# Supplementary material for: Virtual Screening, Structural Analysis, and Formation Thermodynamics of Carbamazepine Cocrystals
Source: MDPI journal article supplement (doi:10.3390/pharmaceutics15030836), 2023-03-03
Supplement: s1 [file s1]

# Supplementary Materials: Virtual screening, structural analysis and formation thermodynamics of carbamazepine cocrystals

Artem O. Surov , Anna G. Ramazanova, Alexander P. Voronin, Ksenia V. Drozd, Andrei V. Churakov and German L. Perlovich

**Table S1.** List of the coformers used for screening and results of the experimental cocrystal screening.

| CID   | Molecular structure                                                                 | Name                       | Outcome          |
|-------|-------------------------------------------------------------------------------------|----------------------------|------------------|
| 464   | 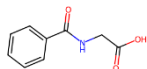   | Hippuric acid              | Physical mixture |
| 1047  |    | Pyrazine-2-carboxylic acid | Physical mixture |
| 3282  |   | Ethenzamide                | Physical mixture |
| 4386  |  | N-phenylanthranilic acid   | Physical mixture |
| 6971  |  | 2-Acetamidobenzoic acid    | Cocrystal        |
| 7470  |  | 4-Methylbenzoic acid       | Physical mixture |
| 7478  |  | 4-Methoxybenzoic acid      | Physical mixture |
| 11370 |  | 2-Methoxybenzoic acid      | Physical mixture |
| 14533 |  | 4-Aminophenylacetic acid   | Physical mixture |

|        |                                                                                     |                             |                  |
|--------|-------------------------------------------------------------------------------------|-----------------------------|------------------|
| 19266  | 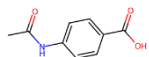   | 4-Acetamidobenzoic acid     | Cocrystal        |
| 48847  |    | 3-Acetamidobenzoic acid     | Cocrystal        |
| 66345  |    | 4-(Methylamino)benzoic acid | Physical mixture |
| 76079  |    | 4-Aminobenzamide            | Physical mixture |
| 108776 |    | 4-Ethoxybenzamide           | Physical mixture |
| 445858 |  | Ferulic acid                | Physical mixture |
| 637775 |  | Sinapic acid                | Physical mixture |
| 689043 |  | Caffeic Acid                | Physical mixture |

**Table S2.** List of calculated score values for different virtual screening models for experimentally tested CBZ – coformer pairs (87 cases).

| CID | Coformer                                       | CCGNet | HBP   | MEP method A | MEP method B | experimental outcome | Refcode or ref. |
|-----|------------------------------------------------|--------|-------|--------------|--------------|----------------------|-----------------|
| 19  | 2,3-Dihydroxybenzoic acid                      | 37.2   | -0.09 | 2            | 10           | yes                  | LEXQAJ          |
| 135 | 4-Hydroxybenzoic acid                          | -22.7  | -0.09 | 5.9          | 11.7         | yes                  | MOXVIF          |
| 178 | Acetamide                                      | 34.7   | 0.01  | -2.3         | 4            | yes                  | [1]             |
| 196 | Adipic Acid                                    | -32    | 0.06  | 1.8          | 6.2          | yes                  | MOXVEB          |
| 227 | Anthranilic acid                               | 42.8   | 0.09  | 6.5          | 8.4          | yes                  | RUTGOE          |
| 243 | Benzoic Acid                                   | 41.6   | -0.05 | 3.6          | 5.4          | yes                  | MOXVAX          |
| 338 | Salicylic Acid                                 | 41.3   | -0.1  | 10.8         | 11.1         | yes                  | MOXWAY          |
| 385 | Pimelic acid                                   | -30.1  | 0.06  | 1.8          | 6.2          | no                   | [1]             |
| 464 | Hippuric acid                                  | 42.7   | -0.1  | 4.6          | 4.7          | no                   | This work       |
| 525 | Malic acid                                     | -33.7  | -0.05 | -            | -            | yes                  | [2]             |
| 723 | 2-Butenedioic acid                             | 43.1   | -0.02 | 4.7          | 9.5          | yes                  | WEYFEN          |
| 743 | Glutaric acid                                  | -14.2  | 0.05  | 3.2          | 7.7          | yes                  | MOXVOL          |
| 757 | Glycolic acid                                  | -8.3   | -0.02 | 8.4          | 9.9          | no                   | [2]             |
| 785 | Hydroquinone                                   | 43.9   | -0.15 | 4.6          | 9.9          | yes                  | ABOQUF          |
| 867 | Malonic acid                                   | 7.5    | 0.06  | 4.2          | 9.8          | yes                  | MOXVUR          |
| 875 | Tartaric acid                                  | -16.5  | -0.07 | 2.9          | 12.7         | yes                  | MOXWIG01        |
| 932 | 5,7-Dihydroxy-2-(4-hydroxyphenyl)chroman-4-one | 38.5   | -0.2  | 4.7          | 10.9         | yes                  | TOJSOD          |
| 936 | Nicotinamide                                   | 46.1   | 0.03  | -1.8         | 3.5          | yes                  | UNEZES          |

|         |                                              |       |       |      |      |     |           |
|---------|----------------------------------------------|-------|-------|------|------|-----|-----------|
| 938     | Nicotinic acid                               | -19.9 | -0.04 | 7.2  | 8.3  | no  | [3]       |
| 971     | Oxalic Acid                                  | 37.7  | -0.11 | 3.5  | 12.1 | yes | MOXWUS    |
| 978     | 4-Aminobenzoic acid                          | 43.8  | 0.1   | 2.5  | 8.2  | yes | XAQRAJ    |
| 1046    | Pyrazinamide                                 | -12.9 | 0.03  | 0.8  | 2.2  | no  | [4]       |
| 1047    | Pyrazine-2-carboxylic acid                   | 15.3  | 0.04  | -0.4 | 4.2  | no  | This work |
| 1110    | Succinic Acid                                | -18.2 | 0.05  | 1.5  | 6.9  | yes | XOBCIB    |
| 1491    | 2,4-Dihydroxybenzoic acid                    | 45.5  | -0.09 | 5.6  | 12.6 | yes | JANZUX    |
| 1983    | Acetaminophen                                | -7.5  | -0.01 | 0.5  | 7.9  | no  | [5]       |
| 2153    | Theophylline                                 | -8.8  | -0.08 | 5.4  | 8.1  | no  | [5]       |
| 2201    | 9-Anthracenecarboxylic acid                  | 41.7  | -0.13 | 5.9  | 6.4  | yes | LEXPIQ    |
| 2244    | Aspirin                                      | 28.6  | -0.05 | 6    | 6.4  | yes | TAZRAO    |
| 2266    | Azelaic acid                                 | -24.1 | 0.08  | 1.1  | 5.5  | no  | [1]       |
| 2331    | Benzamide                                    | -18   | 0.07  | -0.3 | 3.2  | yes | WEKDID    |
| 2519    | Caffeine                                     | -17.9 | 0.1   | 2.1  | 4.1  | no  | [5]       |
| 3220    | Emodin                                       | 41.5  | -0.02 | 11.7 | 12   | yes | [6]       |
| 3282    | Ethenzamide                                  | 38.1  | 0.1   | -0.2 | 0.9  | no  | This work |
| 3469    | 2,5-Dihydroxybenzoic acid                    | 39    | -0.09 | 6.9  | 11.6 | yes | JAPBAH    |
| 3715    | Indomethacin                                 | 14.1  | -0.06 | 7    | 8.9  | yes | LEZKEI    |
| 3767    | Isoniazid                                    | 44.1  | 0.19  | 1.9  | 4.3  | no  | [1]       |
| 3825    | Ketoprofen                                   | 13.6  | -0.11 | 8.7  | 9    | yes | RAFCEO    |
| 4386    | N-phenylanthranilic acid                     | 37.8  | -0.13 | 7    | 7.5  | no  | This work |
| 4485    | Nifedipine                                   | 44.5  | -0.03 | 8.8  | 9    | yes | WEKDUP    |
| 4649    | 4-Aminosalicylic acid                        | 38.3  | 0.08  | 4.7  | 10   | yes | FAYXOV    |
| 4650    | 1,4-Benzoquinone                             | 46.3  | -0.06 | -3.9 | 2.2  | yes | UNEYOB    |
| 5143    | Saccharin                                    | 41.8  | 0.04  | 8    | 9.6  | yes | UNEZAO    |
| 5147    | Salicylamide                                 | -28.2 | 0.07  | 2.5  | 6.4  | no  | [4]       |
| 5192    | Sebacic acid                                 | -22   | 0.08  | 1.1  | 5.5  | no  | [1]       |
| 6409    | 2,2,2-Trifluoroethanol                       | 42.5  | 0.12  | 5.1  | 7.7  | yes | SAPDUJ    |
| 6844    | 1-Hydroxy-2-naphthoic acid                   | 35.6  | -0.11 | 11   | 11   | yes | MOXWEC    |
| 6971    | N-Acetylthranilic acid                       | 30.9  | -0.12 | 5.2  | 5.3  | yes | This work |
| 7064    | 6-Phenyl-1,3,5-triazine-2,4-diamine          | 45.1  | 0.15  | -0.8 | 7.7  | yes | BIXBOC    |
| 7433    | 3,5-Dinitrobenzoic acid                      | -22.6 | -0.17 | 13.7 | 18.7 | yes | HORWIX    |
| 7456    | Methylparaben                                | 29.5  | -0.14 | 6.3  | 7.2  | yes | HEDYAU    |
| 7470    | 4-Methylbenzoic acid                         | 21.4  | -0.05 | 3.4  | 4.5  | no  | This work |
| 7478    | 4-Methoxybenzoic acid                        | 6.8   | -0.01 | 3.4  | 3.8  | no  | This work |
| 7978    | 2-Aminopyrimidine                            | -2    | 0.11  | -1.5 | 1.1  | yes | JIQLAZ    |
| 8456    | 2-tert-Butyl-4-methoxyphenol                 | 42.3  | -0.1  | 8.8  | 9.2  | yes | HEDYIC    |
| 8567    | Meglumine                                    | -37.5 | 0.1   | -6.5 | 8.2  | no  | [7]       |
| 9338    | 2,6-Dihydroxybenzoic acid                    | 26.6  | -0.1  | 13.4 | 14.1 | yes | JANZOR    |
| 10367   | 2,6-Pyridinedicarboxylic acid                | 27.6  | -0.11 | 0.5  | 9.6  | yes | XAQRIR    |
| 10457   | Suberic acid                                 | -40.2 | 0.07  | 1.5  | 5.7  | no  | [1]       |
| 11092   | Paeonol                                      | 39.3  | -0.09 | -2   | 3.2  | yes | [6]       |
| 11107   | 4,4'-Bipyridine                              | 5.9   | 0.16  | 0.2  | 4    | yes | XAQQUC    |
| 11112   | Nicotinic acid hydrazide                     | 44.8  | 0.18  | 1.7  | 4.6  | no  | [1]       |
| 11370   | 2-Methoxybenzoic acid                        | 9.6   | -0.01 | 0.7  | 1    | no  | This work |
| 14300   | 4-Nitropyridine N-oxide                      | 45.5  | 0.17  | -2.9 | 3.1  | yes | JIQKUS    |
| 14533   | 4-Aminophenylacetic acid                     | 32.2  | 0.21  | 1.9  | 5.2  | no  | This work |
| 15070   | Picolinamide                                 | -49.1 | 0.04  | -0.7 | 0.6  | no  | [8]       |
| 15074   | Isonicotinamide                              | -23.2 | 0.03  | -0.4 | 4.2  | yes | LOFKIB    |
| 19266   | 4-Acetamidobenzoic acid                      | 24.8  | -0.11 | 0.1  | 5.4  | yes | This work |
| 21954   | Maleic hydrazide                             | -2.1  | -0.01 | 1.7  | 7.1  | no  | [1]       |
| 48847   | 3-Acetamidobenzoic acid                      | 23.3  | -0.12 | -0.9 | 5.8  | yes | This work |
| 65052   | 4-Hydroxybenzamide                           | 45.8  | 0.11  | 0.6  | 7.1  | yes | SOGSEP    |
| 66345   | 4-(Methylamino)benzoic acid                  | 39.8  | -0.01 | 3    | 6.7  | no  | This work |
| 69021   | 2-Hydroxyacetamide                           | 5.6   | 0.09  | -0.6 | 5.5  | no  | [7]       |
| 72073   | Quinoxin                                     | 42.3  | 0.16  | 1.4  | 3.2  | yes | VIGGOI    |
| 76079   | 4-Aminobenzamide                             | -31.3 | 0.12  | -1.6 | 5.6  | no  | This work |
| 94220   | Lactamide                                    | 4.3   | 0.06  | -0.4 | 3.3  | no  | [7]       |
| 108776  | 4-Ethoxybenzamide                            | 36.8  | 0.08  | 0.5  | 1.1  | no  | This work |
| 222656  | DL-malic acid                                | -37.2 | -0.06 | 4.4  | 11.1 | yes | [2]       |
| 444266  | Maleic acid                                  | 6.6   | -0.02 | 6.7  | 7.8  | yes | MOXWOM    |
| 444539  | Cinnamic acid                                | 39.3  | -0.04 | 3.5  | 4.3  | yes | [9]       |
| 445858  | Ferulic acid                                 | 21.3  | -0.12 | 1.3  | 6.3  | no  | This work |
| 520103  | Pyrazine, 1,4-dioxide                        | 6.3   | 0.2   | -6   | 3.2  | yes | VIGGUO    |
| 637775  | Sinapic acid                                 | 41.3  | -0.09 | -0.3 | 3.5  | no  | This work |
| 643757  | cis-Aconitic acid                            | 15.4  | 0.04  | -2.2 | 10   | yes | [3]       |
| 689043  | Caffeic Acid                                 | 42.3  | -0.1  | -1.4 | 12.5 | no  | This work |
| 2723790 | Thiourea                                     | 46.9  | 0.02  | 2.3  | 11.7 | yes | UWAZID    |
| 3035171 | Benzo[d]isothiazole-3(2H)-thione 1,1-dioxide | 43.1  | -0.02 | 9.1  | 9.8  | yes | YAJGEY    |
| 5281727 | Pterostilbene                                | 40.3  | -0.12 | 9.5  | 13.5 | yes | YABHIU    |

**Table S3.** Experimental data and crystallographic information for [CBZ+3AcAmBA] (1:1), [CBZ+4AcAmBA] (1:1) and 2AcAmBA ethyl acetate solvate.

| Compound                                                                                                       | [CBZ+3AcAmBA] (1:1)                                                                            | [CBZ+4AcAmBA] (1:1)                                                                            | 2AcAmBA ethyl acetate solvate                 |
|----------------------------------------------------------------------------------------------------------------|------------------------------------------------------------------------------------------------|------------------------------------------------------------------------------------------------|-----------------------------------------------|
| Crystal data                                                                                                   |                                                                                                |                                                                                                |                                               |
| Chemical formula                                                                                               | C <sub>15</sub> H <sub>12</sub> N <sub>2</sub> O·C <sub>9</sub> H <sub>9</sub> NO <sub>3</sub> | C <sub>15</sub> H <sub>12</sub> N <sub>2</sub> O·C <sub>9</sub> H <sub>9</sub> NO <sub>3</sub> | C <sub>9</sub> H <sub>9</sub> NO <sub>3</sub> |
| <i>M<sub>r</sub></i>                                                                                           | 415.44                                                                                         | 415.44                                                                                         | 179.17                                        |
| Crystal system, space group                                                                                    | Monoclinic, <i>P</i> 2 <sub>1</sub> / <i>n</i>                                                 | Monoclinic, <i>P</i> 2 <sub>1</sub> / <i>c</i>                                                 | Monoclinic, <i>C</i> 2/ <i>c</i>              |
| Temperature (K)                                                                                                | 100                                                                                            | 150                                                                                            | 150                                           |
| <i>a</i> , <i>b</i> , <i>c</i> (Å)                                                                             | 7.0272 (3), 11.4177 (4), 25.3995 (10)                                                          | 6.7920 (2), 24.9978 (8), 12.1120 (4)                                                           | 14.3522 (12), 18.7197 (16), 7.4273 (6)        |
| β (°)                                                                                                          | 97.7026 (15)                                                                                   | 94.9744 (12)                                                                                   |                                               |
| <i>V</i> (Å <sup>3</sup> )                                                                                     | 2019.53 (14)                                                                                   | 2048.69 (11)                                                                                   | 92.155 (3)                                    |
| <i>Z</i>                                                                                                       | 4                                                                                              | 4                                                                                              | 8                                             |
| Radiation type                                                                                                 |                                                                                                | Mo Kα                                                                                          |                                               |
| μ (mm <sup>−1</sup> )                                                                                          | 0.10                                                                                           | 0.09                                                                                           | 0.09                                          |
| Crystal size (mm)                                                                                              | 0.25 × 0.15 × 0.10                                                                             | 0.25 × 0.25 × 0.20                                                                             | 0.15 × 0.15 × 0.01                            |
| Data collection                                                                                                |                                                                                                |                                                                                                |                                               |
| Diffractionmeter                                                                                               | Bruker D8 Venture                                                                              | Bruker D8 Venture                                                                              | Bruker D8 Venture                             |
| Absorption correction                                                                                          | Multi-scan<br><i>SADABS</i> (Bruker, 2016)                                                     | Multi-scan<br><i>SADABS</i> (Bruker, 2016)                                                     | Multi-scan<br><i>SADABS</i> (Bruker, 2016)    |
| <i>T<sub>min</sub></i> , <i>T<sub>max</sub></i>                                                                | 0.871, 0.928                                                                                   | 0.883, 0.928                                                                                   | 0.837, 0.928                                  |
| No. of measured, independent and observed [ <i>I</i> > 2σ( <i>I</i> )] reflections                             | 26443, 4407, 3385                                                                              | 29190, 4922, 4316                                                                              | 11010, 1856, 1327                             |
| <i>R<sub>int</sub></i>                                                                                         | 0.055                                                                                          | 0.029                                                                                          | 0.047                                         |
| (sin θ/λ) <sub>max</sub> (Å <sup>−1</sup> )                                                                    | 0.639                                                                                          | 0.661                                                                                          | 0.606                                         |
| Refinement                                                                                                     |                                                                                                |                                                                                                |                                               |
| <i>R</i> [ <i>F</i> <sup>2</sup> > 2σ( <i>F</i> <sup>2</sup> )], <i>wR</i> ( <i>F</i> <sup>2</sup> ), <i>S</i> | 0.041, 0.091, 1.02                                                                             | 0.039, 0.102, 1.04                                                                             | 0.041, 0.117, 1.02                            |
| No. of reflections                                                                                             | 4407                                                                                           | 4922                                                                                           | 1856                                          |
| No. of parameters                                                                                              | 365                                                                                            | 365                                                                                            | 154                                           |
| H-atom treatment                                                                                               | All H-atom parameters refined                                                                  | All H-atom parameters refined                                                                  | All H-atom parameters refined                 |
| Δ <i>Q</i> <sub>max</sub> , Δ <i>Q</i> <sub>min</sub> (e Å <sup>−3</sup> )                                     | 0.23, −0.18                                                                                    | 0.35, −0.17                                                                                    | 0.43, −0.19                                   |

**Table S4.** Metric and energetic parameters for conventional hydrogen bonds in [CBZ+3AcAmBA] (1:1) and [CBZ+4AcAmBA] (1:1).

| Crystal                    | [CBZ+3AcAmBA] (1:1) |            |            |                        | [CBZ+4AcAmBA] (1:1) |            |            |                        |
|----------------------------|---------------------|------------|------------|------------------------|---------------------|------------|------------|------------------------|
| Fragment                   | D(X⋯A)              | D(H⋯A)     | ∠(D—H⋯A)   | <i>E<sub>int</sub></i> | D(X⋯A)              | D(H⋯A)     | ∠(D—H⋯A)   | <i>E<sub>int</sub></i> |
| O1—H1⋯O3 <sup>i</sup>      | 2.6182 (16)         | 1.76 (2)   | 160 (2)    | 42.2                   | 2.6046 (13)         | 1.70 (2)   | 161 (2)    | 45.4                   |
| N1—H1⋯O11                  | 2.8430 (16)         | 1.950 (19) | 169.3 (17) | 28.5                   | 2.8676 (13)         | 1.991 (17) | 167.3 (15) | 27.0                   |
| N11—H11⋯O11 <sup>iii</sup> | 2.9248 (17)         | 1.991 (19) | 178.2 (16) | 24.2                   | 2.9017 (13)         | 2.014 (17) | 175.5 (15) | 26.5                   |
| N11—H12⋯O2 <sup>iii</sup>  | 2.8768 (16)         | 2.088 (19) | 146.7 (16) | 20.9                   | 2.9737 (14)         | 2.193 (16) | 147.2 (14) | 17.5                   |

<sup>a</sup>Distances between the donor and acceptor atoms D(X⋯A) and between the hydrogen and acceptor atom D(H⋯A) in Å, where X=O, N and A=O, N, angle ∠(X—H⋯A) in °, the interaction energy (*E<sub>int</sub>*) obtained from eq. (2) in kJ mol<sup>−1</sup>.

Symmetry codes: (i) *x*+1, *−y*+1/2, *z*−1/2; (ii) *−x*+1, *−y*+1, *−z*+2; (iii) *−x*+1, *y*+1/2, *−z*+3/2.

**Table S5.** Experimental values of solubility product (*K<sub>sp</sub>* in (mol·L<sup>−1</sup>)<sup>2</sup>) for the selected [CBZ + CF] (1:1) cocrystals, intrinsic solubility of CBZ (*S*<sub>0</sub>(CBZ) in mol·L<sup>−1</sup>) and coformer (*S*<sub>0</sub>(CF) in mol·L<sup>−1</sup>) in different solvents and the calculated values of the Gibbs energy of the cocrystallization reaction (Δ*G<sub>form</sub>* in kJ·mol<sup>−1</sup>).

| Coformer      | Solvent       | log( <i>K<sub>sp</sub></i> ) | log( <i>S</i> <sub>0</sub> (CBZ)) | log( <i>S</i> <sub>0</sub> (CF)) | Δ <i>G<sub>form</sub></i> | Ref  |
|---------------|---------------|------------------------------|-----------------------------------|----------------------------------|---------------------------|------|
| Emodin        | Ethanol       | −4.28                        | −0.97                             | −1.74                            | −8.91                     | [6]  |
| Emodin        | 2-propanol    | −4.82                        | −1.36                             | −1.68                            | −10.21                    | [6]  |
| Emodin        | Ethyl acetate | −4.64                        | −1.32                             | −1.43                            | −10.77                    | [6]  |
| Emodin        | Acetone       | −4.07                        | −1.27                             | −1.29                            | −8.58                     | [6]  |
| Paconol       | 2-propanol    | −2.32                        | −1.36                             | −0.12                            | −4.83                     | [6]  |
| Paconol       | Ethanol       | −1.74                        | −0.97                             | 0.08                             | −4.84                     | [6]  |
| Paconol       | Methanol      | −0.84                        | −0.49                             | 0.22                             | −3.19                     | [6]  |
| Nicotinamide  | Ethyl acetate | −3.17                        | −1.31                             | −0.96                            | −5.17                     | [10] |
| Nicotinamide  | Ethanol       | −1.66                        | −0.85                             | 0.04                             | −4.82                     | [10] |
| Nicotinamide  | 2-propanol    | −2.43                        | −1.3                              | −0.2                             | −5.31                     | [10] |
| Glutaric acid | Ethyl acetate | −2.05                        | −1.31                             | 0                                | −4.23                     | [10] |
| Glutaric acid | Ethanol       | −1.03                        | −0.85                             | 0.45                             | −3.54                     | [10] |
| Glutaric acid | 2-propanol    | −1.31                        | −1.3                              | 0.56                             | −3.23                     | [10] |

**Table S6.** Solubility values of carbamazepine and isomers of acetamidobenzoic acid in the selected organic solvents. The solubility ratio ( $C_{p,CBZ}/C_{p,coformer}$ ) is shown in parenthesis.

| Solvent      | $C_{p,CBZ} \cdot 10^2$ | $C_{p,2AcAmBA} \cdot 10^2$ | $C_{p,3AcAmBA} \cdot 10^2$ | $C_{p,4AcAmBA} \cdot 10^2$ |
|--------------|------------------------|----------------------------|----------------------------|----------------------------|
| Acetonitrile | 14.2±0.3               | 2.50±0.08<br>(5.7)         | 0.43 ± 0.10<br>(33.0)      | 1.01±0.01<br>(14.1)        |
| Methanol     | 22.0±0.2               | -                          | 7.50±0.05<br>(2.9)         | -                          |

**Table S7.** Solubility of CBZ, 4AcAmBA and cocrystal in acetonitrile at different temperatures, values of  $\ln K_f$  and the Gibbs energy associated with the [CBZ+4AcAmBA] (1:1) cocrystal formation.

| T<br>K | $C_{p,CBZ} \cdot 10^2$ | $C_{p,4AcAmBA} \cdot 10^2$ | $C_{cc,CBZ} \cdot 10^2$ | $C_{cc,4AcAmBA} \cdot 10^2$ | $\ln K_f$ | $\Delta_{form}G$<br>kJ·mol <sup>-1</sup> |
|--------|------------------------|----------------------------|-------------------------|-----------------------------|-----------|------------------------------------------|
|        |                        |                            | mol/l                   |                             |           |                                          |
| 293.15 | 14.2±0.3               | 1.010±0.010                | 0.875±0.014             | 0.880±0.016                 | 2.93±0.04 | -7.13±0.09                               |
| 298.15 | 16.2±0.4               | 1.145±0.005                | 1.013±0.015             | 1.046±0.010                 | 2.86±0.03 | -7.09±0.08                               |
| 303.15 | 19.1±0.4               | 1.280±0.007                | 1.198±0.007             | 1.222±0.017                 | 2.82±0.03 | -7.10±0.07                               |
| 308.15 | 22.2±0.3               | 1.473±0.007                | 1.428±0.009             | 1.472±0.008                 | 2.75±0.02 | -7.04±0.05                               |
| 313.15 | 25.0±0.4               | 1.660±0.030                | 1.684±0.022             | 1.707±0.030                 | 2.67±0.03 | -6.95±0.08                               |

**Table S8.** Solubility of CBZ, 3AcAmBA and cocrystal in methanol at different temperatures, values of  $\ln K_f$  and the Gibbs energy associated with the [CBZ+3AcAmBA] (1:1) cocrystal formation.

| T<br>K | $C_{p,CBZ} \cdot 10^2$ | $C_{p,3AcAmBA} \cdot 10^2$ | $C_{cc,CBZ} \cdot 10^2$ | $C_{cc,3AcAmBA} \cdot 10^2$ | $\ln K_f$  | $\Delta_{form}G$<br>kJ·mol <sup>-1</sup> |
|--------|------------------------|----------------------------|-------------------------|-----------------------------|------------|------------------------------------------|
|        |                        |                            | mol/l                   |                             |            |                                          |
| 293.15 | 22.0±0.2               | 7.50±0.05                  | 7.00±0.06               | 7.0±0.1                     | 1.20±0.02  | -2.93±0.05                               |
| 298.15 | 24.8±0.2               | 8.70±0.05                  | 8.20±0.10               | 8.1±0.1                     | 1.17±0.02  | -2.91±0.05                               |
| 303.15 | 28.5±0.2               | 9.70±0.05                  | 9.50±0.08               | 9.5±0.1                     | 1.12±0.02  | -2.83±0.05                               |
| 308.15 | 32.3±0.3               | 10.90±0.08                 | 11.00±0.08              | 11.1±0.06                   | 1.06±0.015 | -2.72±0.04                               |
| 313.15 | 35.6±0.1               | 11.95±0.06                 | 12.10±0.08              | 12.5±0.07                   | 1.04±0.02  | -2.69±0.03                               |

**Table S9.** Reported experimental thermodynamic parameters for cocrystallization reactions.

| N  | Cocrystal                                  | T<br>K | $\Delta_{form}G$ | $\Delta_{form}H$<br>kJ·mol <sup>-1</sup> | $T\Delta_{form}S$  | Ref.      |
|----|--------------------------------------------|--------|------------------|------------------------------------------|--------------------|-----------|
| 1  | [Bicalutamide + Benzamide] (1:1)           | 298    | -3.4±0.3         | -19.6±0.8                                | -16.2±1.1          | [11]      |
| 2  | [Bicalutamide + Salicylamide] (1:1)        | 298    | -2.2±0.3         | -11.4±0.5                                | -9.2±0.8           | [11]      |
| 3  | [ <sup>a</sup> XI + Vanillic acid] (1:1)   | 298    | -5.3±0.4         | -10.5±0.9                                | -5.2±1.3           | [12]      |
| 4  | [Salinazid + Saccharin] (1:1)              | 298    | -7.3±0.6         | -18.4±1.0                                | -11.1±1.6          | [13]      |
| 5  | [Vanillin isoniazid + Saccharin] (1:1)     | 298    | -9.1±0.8         | -13.5±1.1                                | -4.4±1.9           | [13]      |
| 6  | [4-Aminobenzoic acid + Pyrazinamide] (1:1) | 298    | -6.1±0.3         | -39.6±2.9                                | -33.5±3.2          | [14]      |
| 7  | [CBZ + Saccharin] (1:1)                    | 306    | -4.6             | -5.9±0.9                                 | -1.3               | [15]      |
| 8  | [Adefovir + Saccharin] (1:1)               | 293    | -12.1            | -41.6±6.0 <sup>b</sup>                   | -29.5 <sup>b</sup> | [16]      |
| 9  | [Glycine + Fumaric acid] (2:1)             | 298    | -4.4±0.3         | -5.8±0.5                                 | -1.4±0.6           | [17]      |
| 10 | [Glycine + Maleic acid] (1:1)              | 298    | -5.4±0.4         | -11.1±0.9                                | -5.7±1.0           | [17]      |
| 11 | [Sorafenib + 5-fluorouracil] (1:1)         | 303    | -4.78±0.09       | -4.76±0.07                               | 0.02±0.1           | [18]      |
| 12 | [Nitrofurantoin + Picolinamide] (1:1)      | 298    | -4.9 ± 0.5       | -4.4 ± 0.7                               | 0.6 ± 0.8          | [19]      |
| 13 | [Nitrofurantoin + 2-Aminobenzamide] (1:1)  | 298    | -4.5 ± 0.5       | -3.3 ± 0.8                               | 1.3 ± 1.1          | [19]      |
| 14 | [Nitrofurantoin + Salicylamide] (1:1)      | 298    | -0.6 ± 0.4       | -0.3 ± 0.6                               | 0.3 ± 0.7          | [19]      |
| 15 | [Nitrofurantoin + Isonicotinamide] (1:1)   | 298    | -4.7 ± 0.4       | 1.3 ± 0.6                                | 6.0 ± 0.7          | [19]      |
| 16 | [Celecoxib + Nicotinamide] (1:1)           | 298    | -0.35±0.05       | 6.5±1.5                                  | 6.9±2.0            | [20]      |
| 17 | [Sulfamethazine + salicylic acid] (1:1)    | 293    | -7.1             | 23.1                                     | 29.7               | [21]      |
| 18 | [CBZ + Benzamide] (1:1)                    | 298    | -4.8±0.3         | 25.7 ± 1.9                               | 30.5 ± 2.9         | [22]      |
| 19 | [CBZ + 4-Hydroxybenzamide] (1:1)           | 298    | -6.7 ± 0.5       | -12.4 ± 0.9                              | -5.7 ± 0.5         | [22]      |
| 20 | [CBZ + isonicotinamide] (1:1)              | 298    | -2.1 ± 0.1       | 19.9 ± 1.9                               | 22.0 ± 2.5         | [22]      |
| 21 | [CBZ+3AcAmBA] (1:1)                        | 298    | -2.91±0.05       | -6.7±0.5                                 | -3.8±0.5           | This work |
| 22 | [CBZ+4AcAmBA] (1:1)                        | 298    | -7.09±0.08       | -9.5±0.6                                 | -2.4±0.6           | This work |

<sup>a</sup>XI - 1-[5-(3-Chloro-phenylamino)-1,2,4-thiadiazol-3-yl]-propan-2-ol. <sup>b</sup> Calculated using data provided in the original paper.

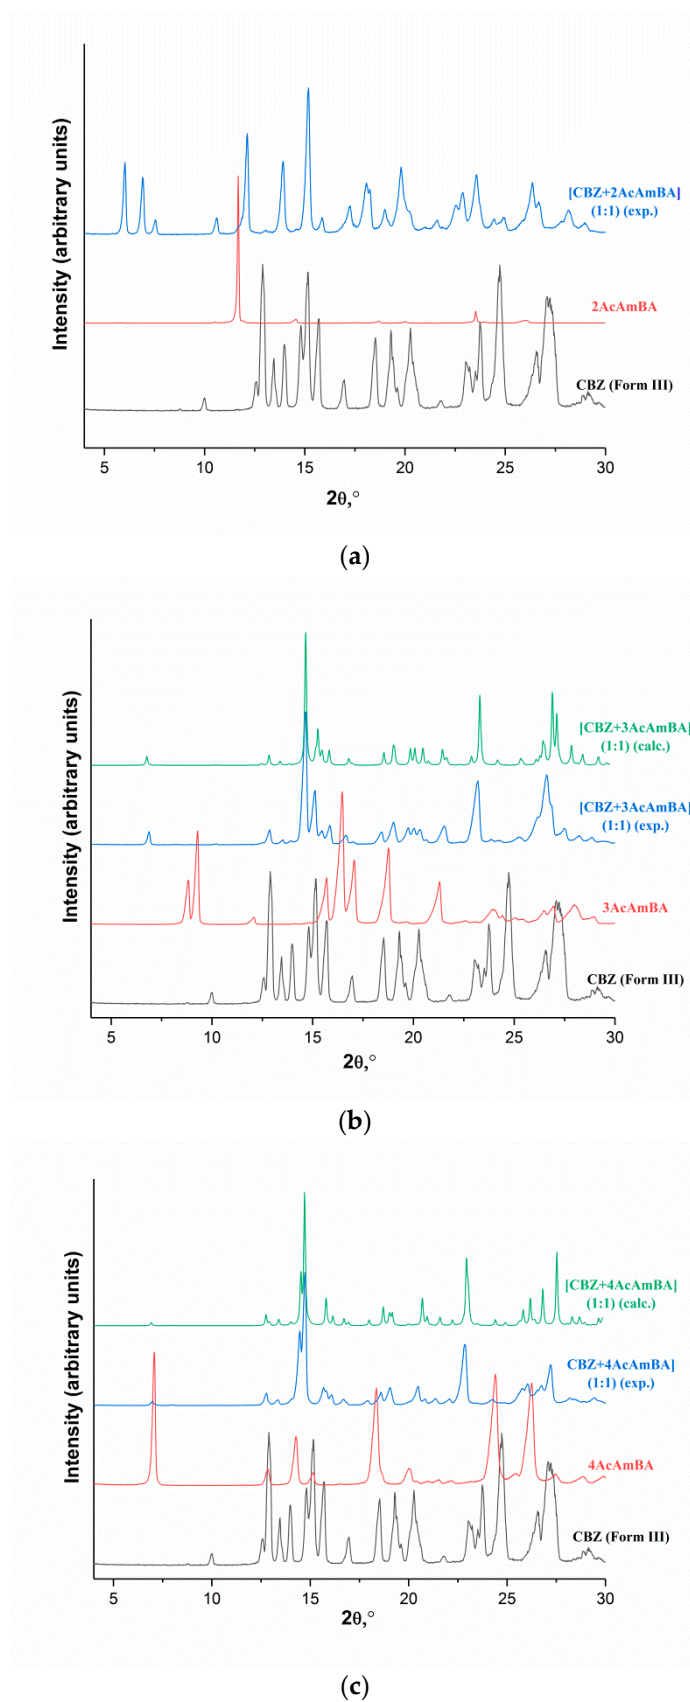

**Figure S1.** Experimental PXRD patterns of CBZ, 2AcAmBA, 3AcAmBA, 4AcAmBA and the cocrystals obtained via mechanochemical treatment: (a) [CBZ+2AcAmBA] (1:1), (b) [CBZ+3AcAmBA] (1:1), (c) [CBZ+4AcAmBA] (1:1).

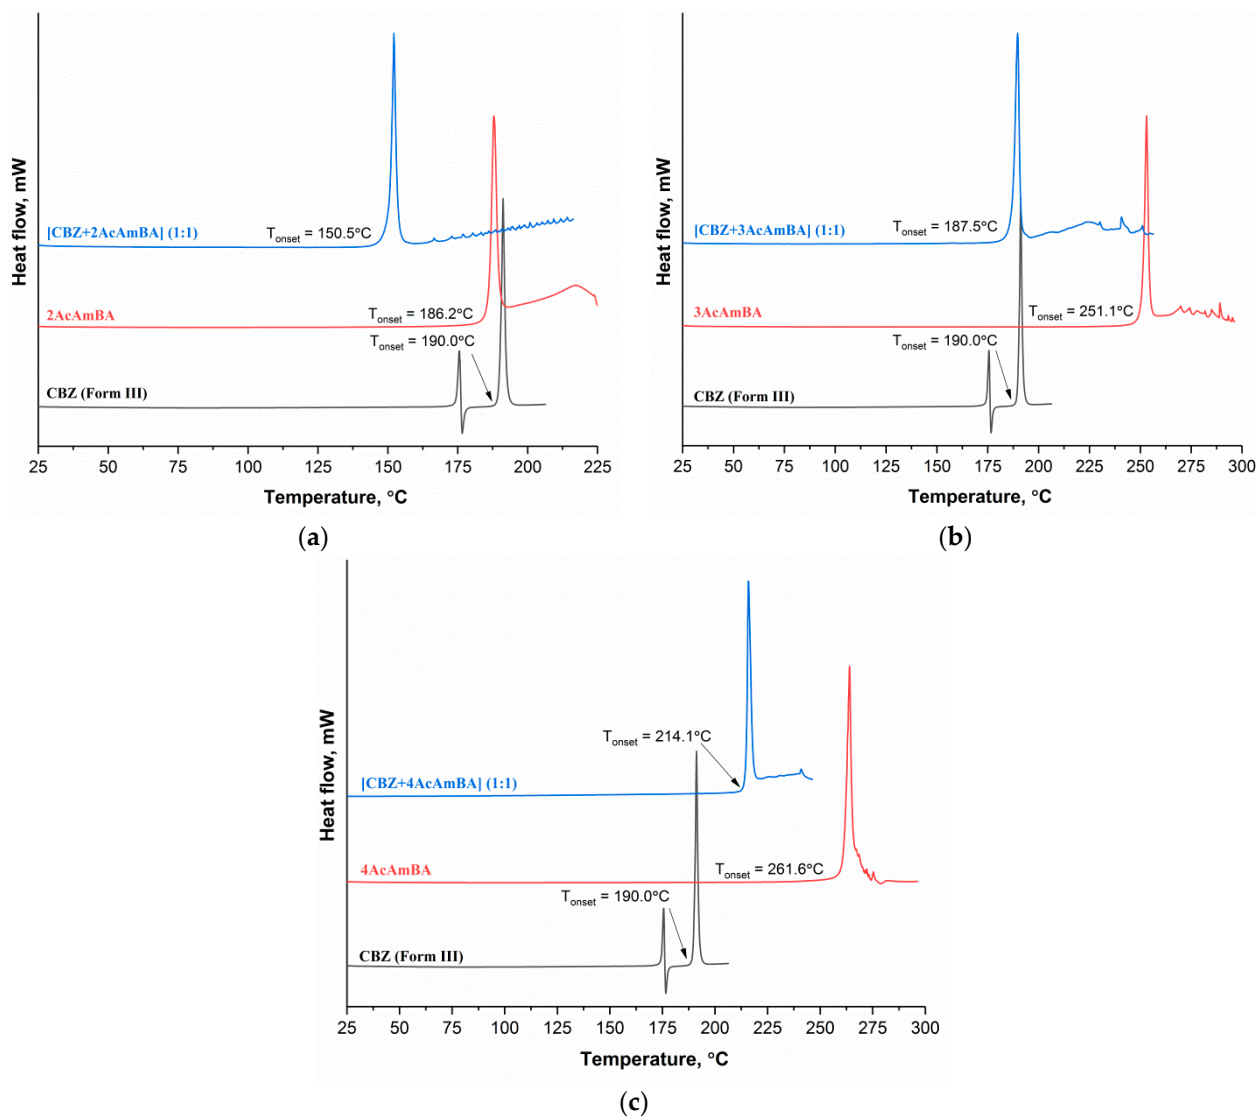

**Figure S2.** Experimental DSC curves for CBZ, 2AcAmBA, 3AcAmBA, 4AcAmBA and the obtained cocrystals: (a) [CBZ+2AcAmBA] (1:1), (b) [CBZ+3AcAmBA] (1:1), (c) [CBZ+4AcAmBA] (1:1).

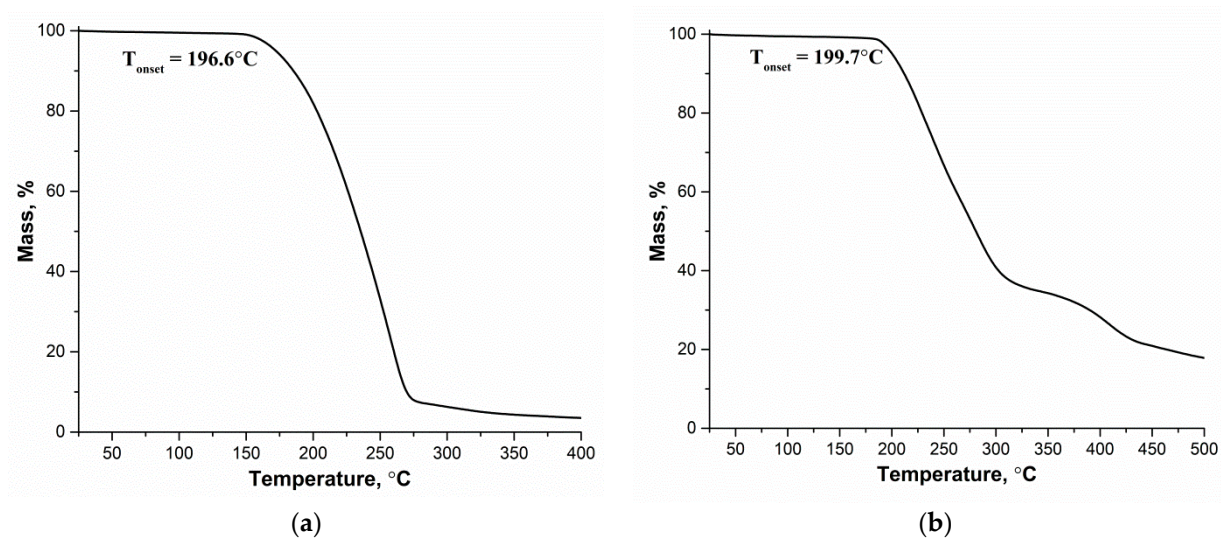



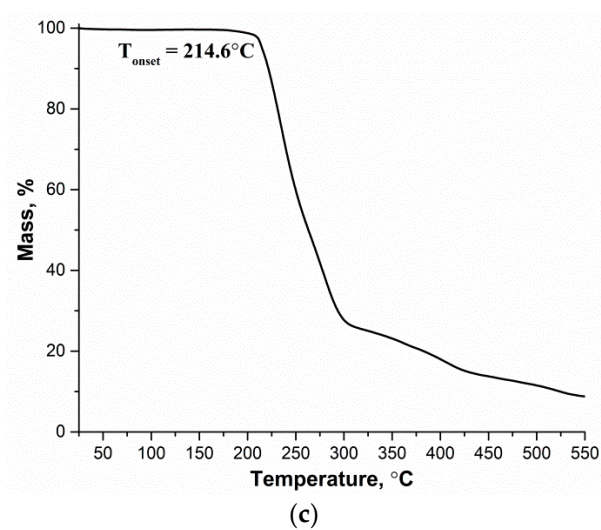

**Figure S3.** Experimental TGA curves for the obtained cocrystals: (a) [CBZ+2AcAmBA] (1:1), (b) [CBZ+3AcAmBA] (1:1), (c) [CBZ+4AcAmBA] (1:1).

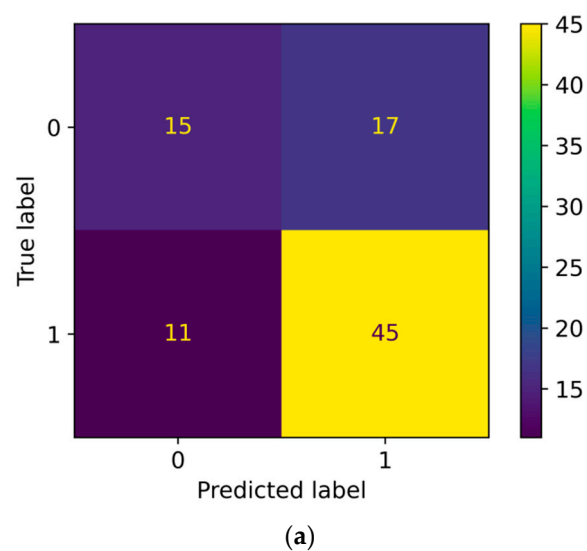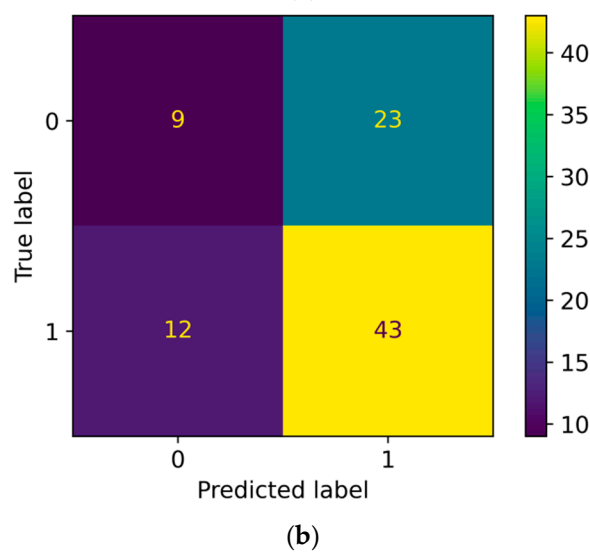



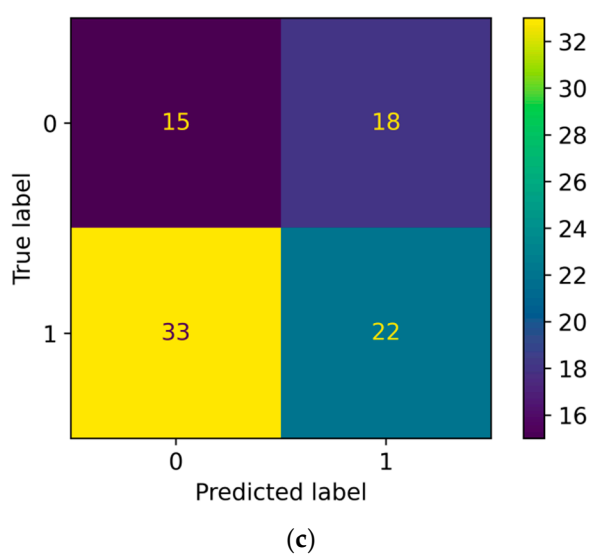

**Figure S4.** Confusion matrixes calculated from predictions of the tested models on the CBZ - coformer dataset: (a) CCGNet, (b) Method A, (c) HBP.

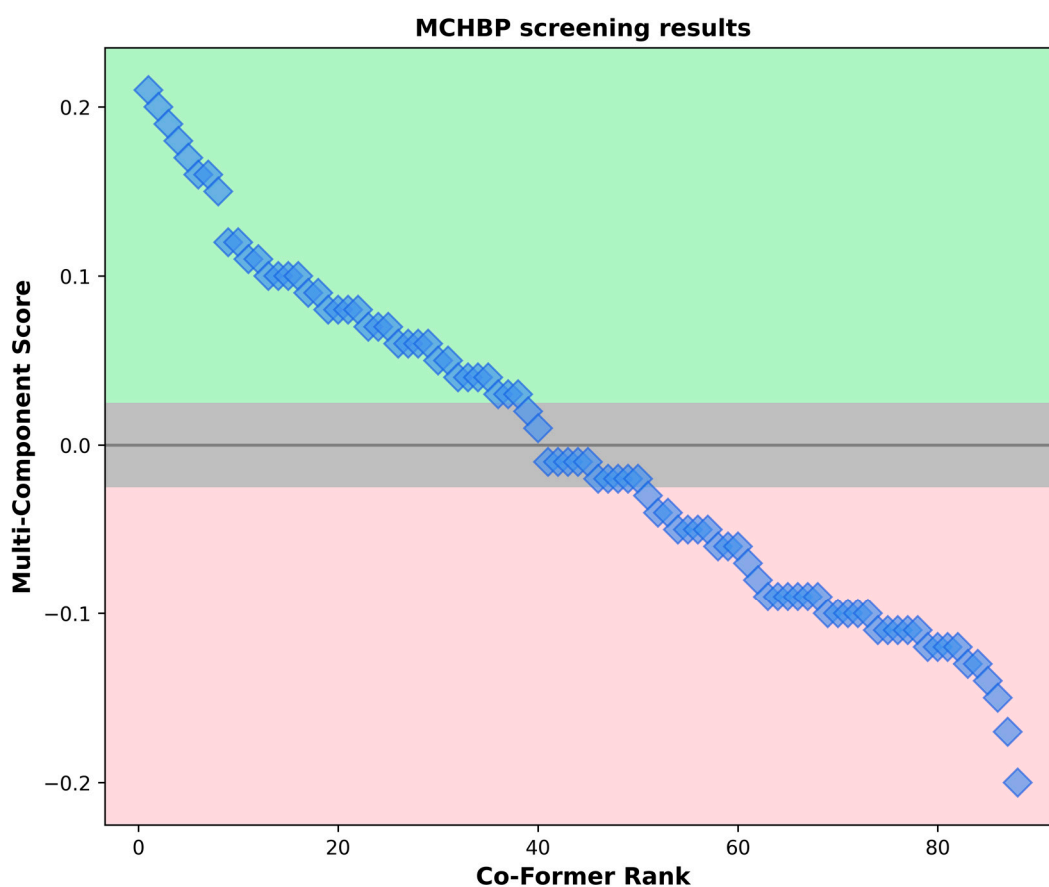

**Figure S5.** Multicomponent hydrogen-bond propensity chart for CBZ and selected cofomers.

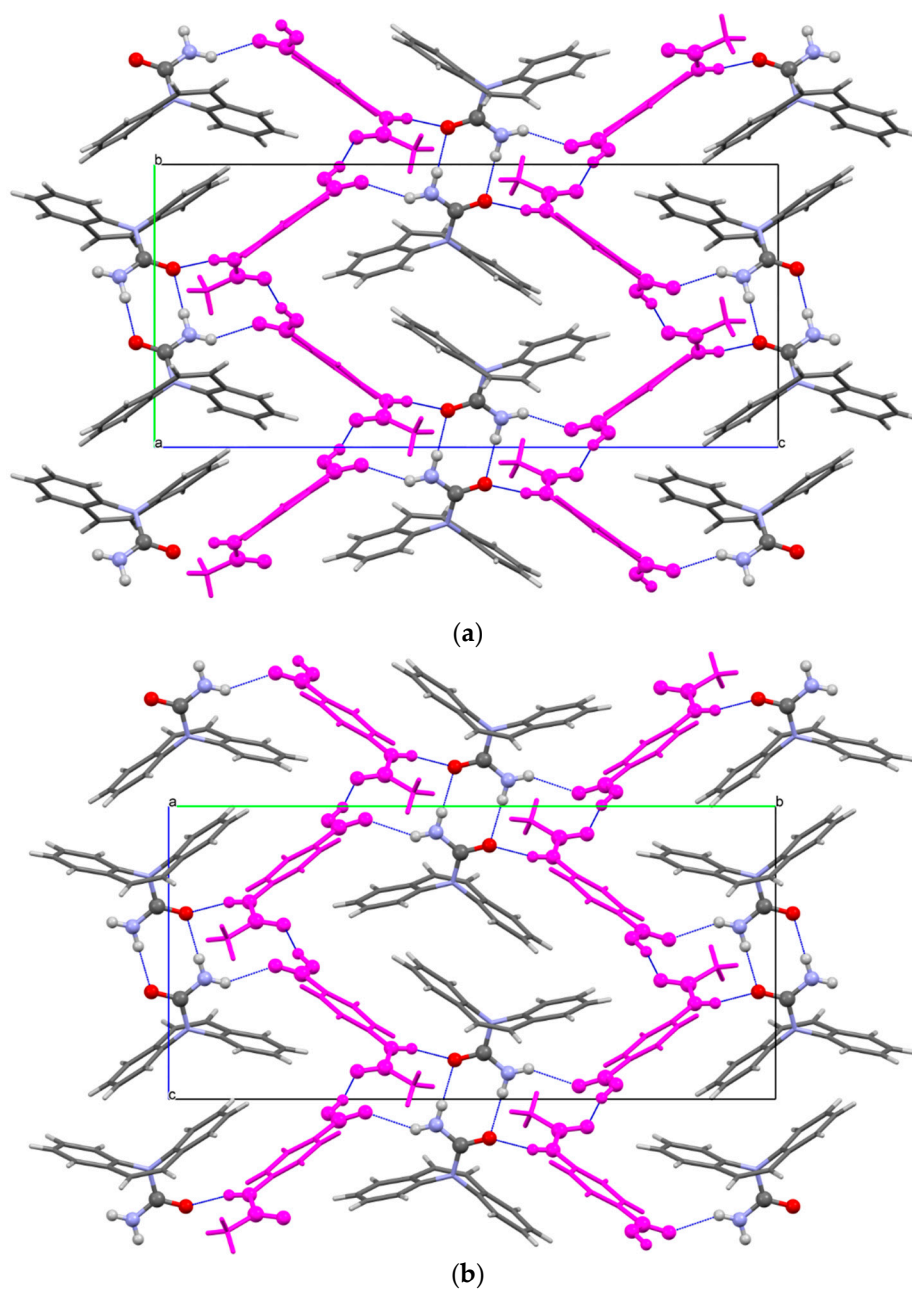

**Figure S6.** Packing of CBZ and coformer molecules (colored magenta) in the crystal structures of [CBZ+3AcAmBA] (1:1) (a) and [CBZ+4AcAmBA] (1:1) (b).

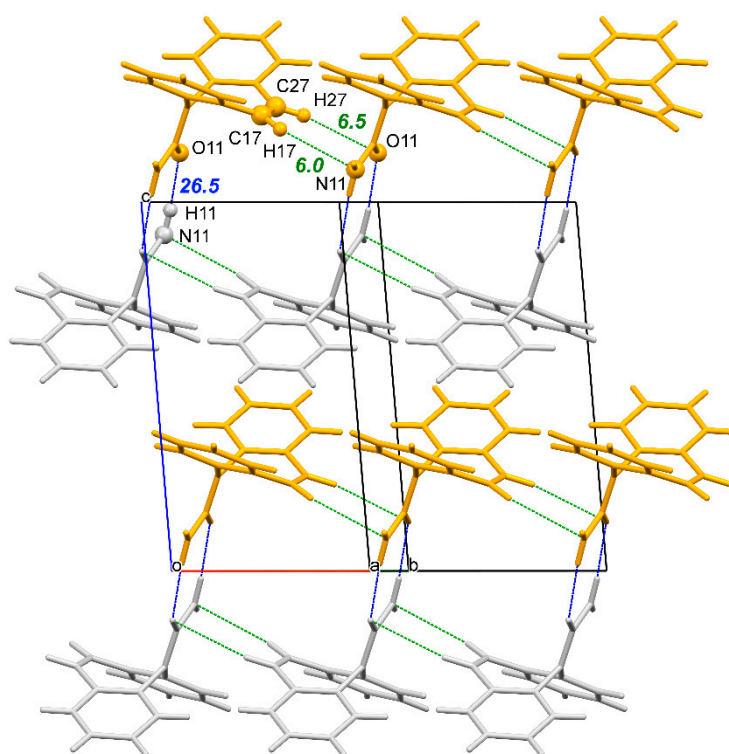

**Figure S7.** Packing of CBZ dimers in [CBZ+4AcAmBA] (1:1). The molecules are colored by symmetry operation and the numbers indicate the energies of a particular non-covalent interaction estimated according to the QTAIMC scheme in  $\text{kJ}\cdot\text{mol}^{-1}$ .

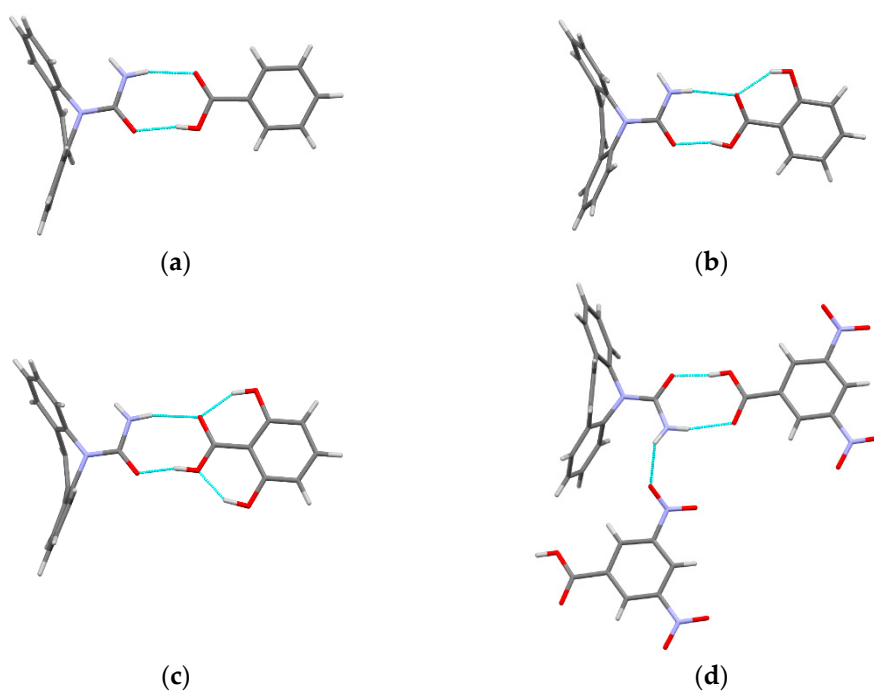

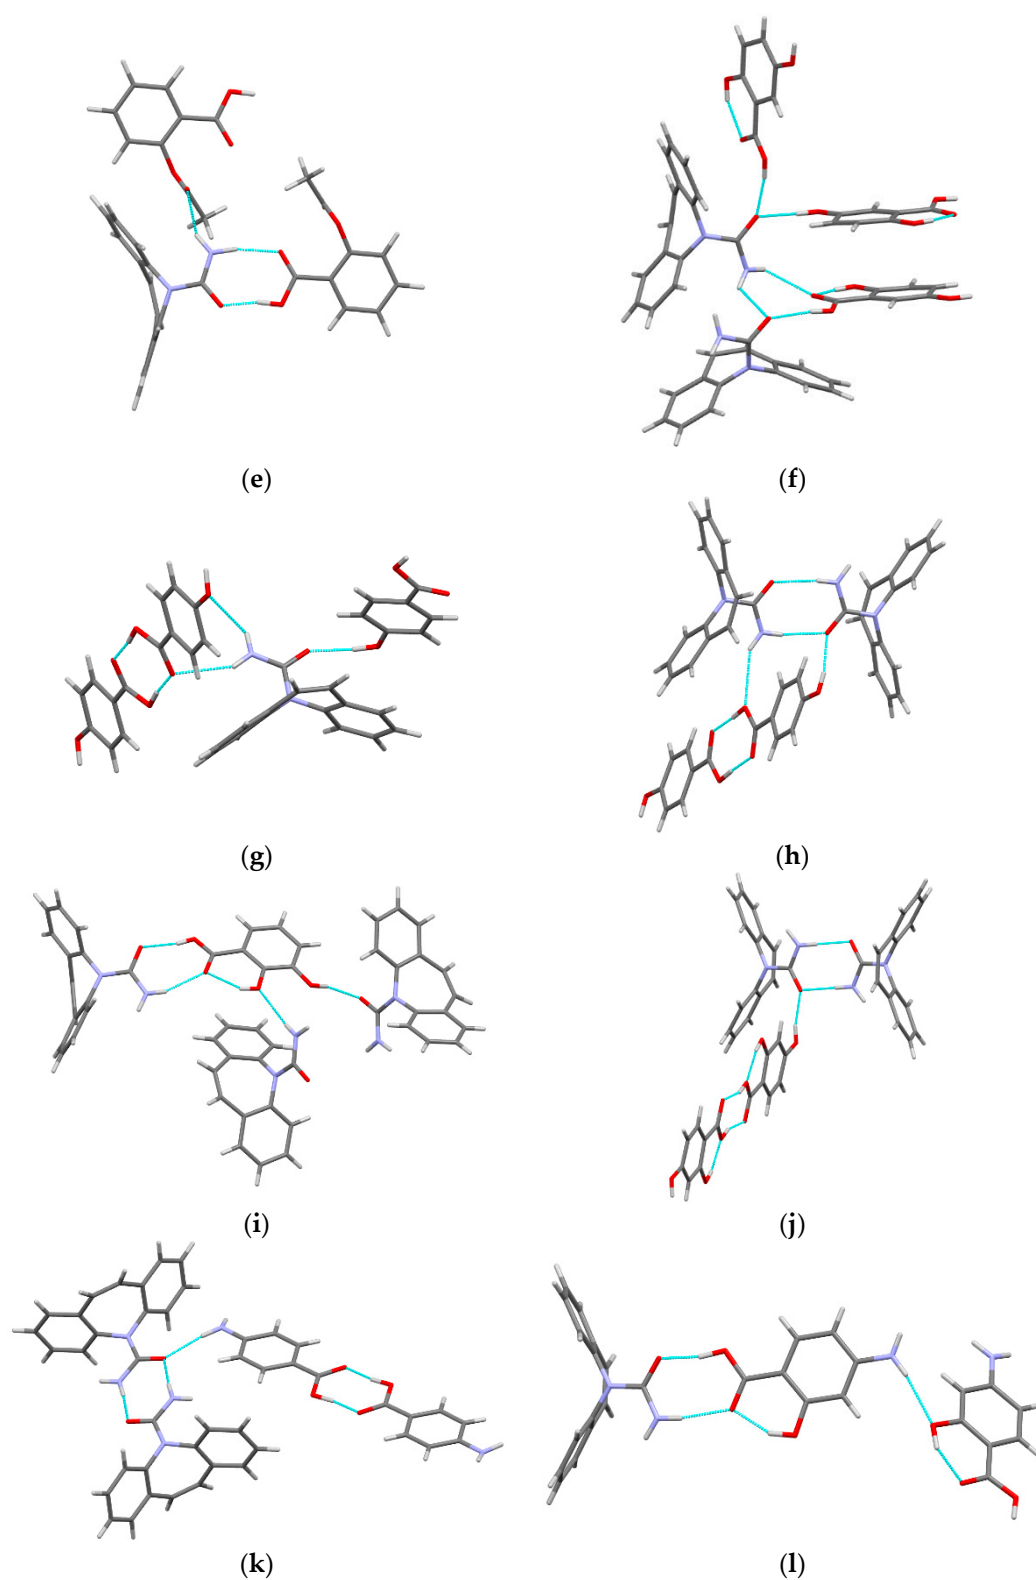

**Figure S8.** Illustration of hydrogen bonding motifs in the CBZ cocrystals (1:1) with benzoic acid (a), salicylic acid (b), 2,6-dihydroxybenzoic acid (c), 3,5-dinitrobenzoic acid (d), acetylsalicylic acid (e), 2,5-dihydroxybenzoic acid (f), 4-hydroxybenzoic acid (stable form) (g), 4-hydroxybenzoic acid (metastable form) (h), 2,3-dihydroxybenzoic acid (i), 2,4-dihydroxybenzoic acid (j), 4-aminobenzoic acid (k), 4-aminosalicylic acid (l).

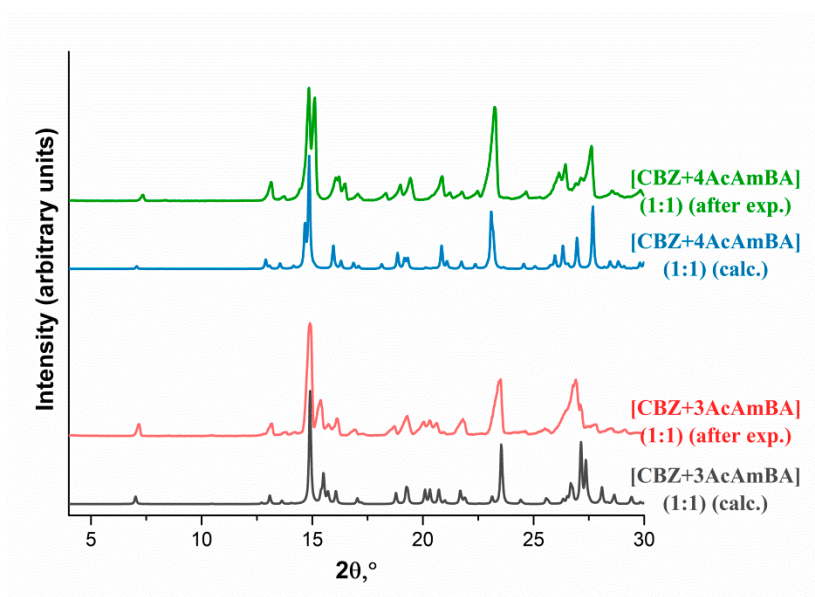

**Figure S9.** Experimental PXRD patterns of the [CBZ+3AcAmBA] and [CBZ+4AcAmBA] cocrystals and residual materials after long-term equilibrium experiment in organic solvent (methanol or acetonitrile).

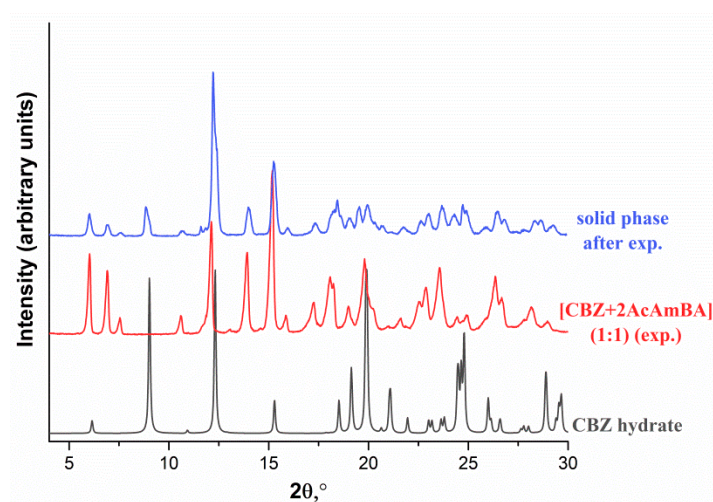

(a)

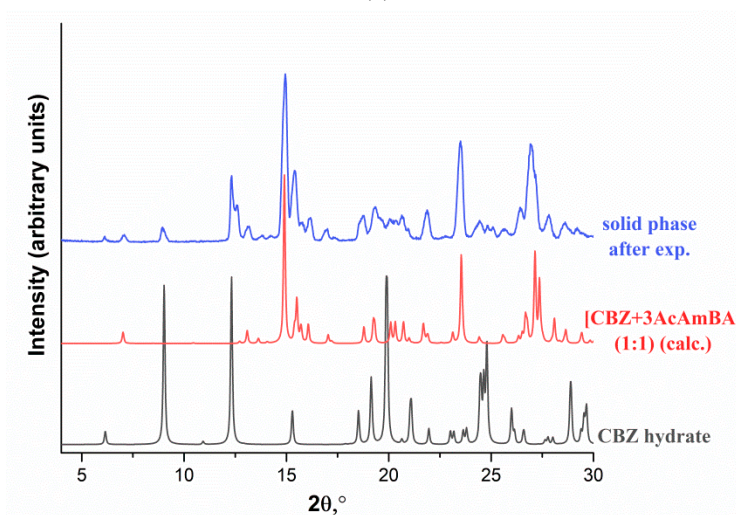

(b)



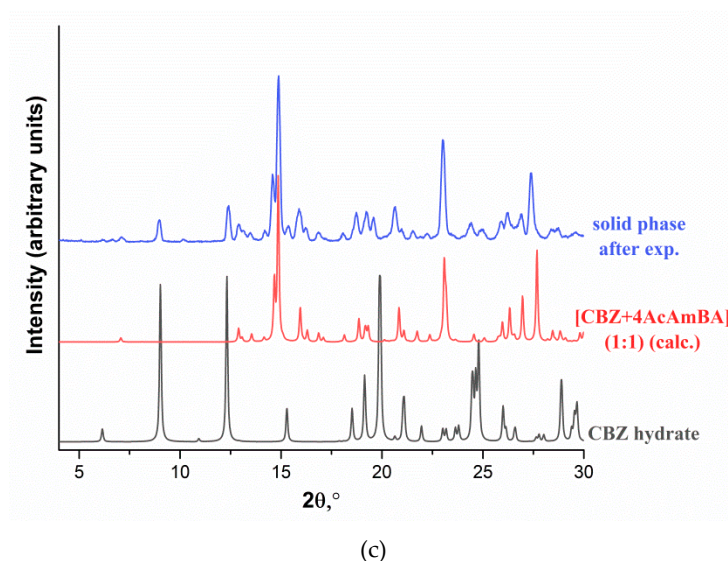

**Figure S10.** Experimental PXRD patterns of [CBZ+2AcAmBA] (1:1) (a), [CBZ+3AcAmBA] (1:1) (b), [CBZ+4AcAmBA] (1:1) (c) and solid phases at the eutectic point in a pH 2.0 buffer solution, indicating that both drug and cocrystal solids are presented in equilibrium with the solution.

## References:

1. Sathisaran, I. and S.V. Dalvi, *Investigating Cocrystallization of Carbamazepine with Structurally Compatible Coformers: New Cocrystal and Eutectic Phases with Enhanced Dissolution*. AAPS PharmSciTech, 2021. **22**(1): p. 29.
2. Childs, S.L., N. Rodríguez-Hornedo, L.S. Reddy, A. Jayasankar, C. Maheshwari, L. McCausland, R. Shipplett, and B.C. Stahly, *Screening strategies based on solubility and solution composition generate pharmaceutically acceptable cocrystals of carbamazepine*. CrystEngComm, 2008. **10**(7): p. 856-864.
3. Sugden, I.J., D.E. Braun, D.H. Bowskill, C.S. Adjiman, and C.C. Pantelides, *Efficient Screening of Coformers for Active Pharmaceutical Ingredient Cocrystallization*. Crystal Growth & Design, 2022. **22**(7): p. 4513-4527.
4. Sathisaran, I. and S.V. Dalvi, *Cocrystallization of carbamazepine with amides: Cocrystal and eutectic phases with improved dissolution*. Journal of Molecular Structure, 2019. **1193**: p. 398-415.
5. Roca-Paixão, L., N.T. Correia, and F. Affouard, *Affinity prediction computations and mechanosynthesis of carbamazepine based cocrystals*. CrystEngComm, 2019. **21**(45): p. 6991-7001.
6. Huang, D., H.C.S. Chan, Y. Wu, L. Li, L. Zhang, Y. Lv, X. Yang, and Z. Zhou, *Phase solubility investigation and theoretical calculations on drug-drug cocrystals of carbamazepine with Emodin, Paeonol*. Journal of Molecular Liquids, 2021. **329**: p. 115604.
7. Yamamoto, K., S. Tsutsumi, and Y. Ikeda, *Establishment of cocrystal cocktail grinding method for rational screening of pharmaceutical cocrystals*. International Journal of Pharmaceutics, 2012. **437**(1): p. 162-171.
8. Habgood, M., M.A. Deij, J. Mazurek, S.L. Price, and J.H. ter Horst, *Carbamazepine Co-crystallization with Pyridine Carboxamides: Rationalization by Complementary Phase Diagrams and Crystal Energy Landscapes*. Crystal Growth & Design, 2010. **10**(2): p. 903-912.
9. Shayanfar, A., K. Asadpour-Zeynali, and A. Jouyban, *Solubility and dissolution rate of a carbamazepine-cinnamic acid cocrystal*. Journal of Molecular Liquids, 2013. **187**: p. 171-176.
10. Good, D.J. and N. Rodríguez-Hornedo, *Solubility Advantage of Pharmaceutical Cocrystals*. Crystal Growth & Design, 2009. **9**(5): p. 2252-2264.
11. Surov, A.O., K.A. Solanko, A.D. Bond, A. Bauer-Brandl, and G.L. Perlovich, *Cocrystals of the antiandrogenic drug bicalutamide: screening, crystal structures, formation thermodynamics and lattice energies*. CrystEngComm, 2016. **18**(25): p. 4818-4829.
12. Surov, A.O., T.V. Volkova, A.V. Churakov, A.N. Proshin, I.V. Terekhova, and G.L. Perlovich, *Cocrystal formation, crystal structure, solubility and permeability studies for novel 1,2,4-thiadiazole derivative as a potent neuroprotector*. European Journal of Pharmaceutical Sciences, 2017. **109**: p. 31-39.
13. Surov, A.O., A.P. Voronin, A.A. Simagina, A.V. Churakov, S.Y. Skachilova, and G.L. Perlovich, *Saccharin salts of biologically active hydrazone derivatives*. New Journal of Chemistry, 2015. **39**(11): p. 8614-8622.
14. Drozd, K.V., A.N. Manin, and G.L. Perlovich, *Comparative analysis of experimental methods for determining thermodynamic parameters of formation of multi-component molecular crystals: Benefits and limitations*. Journal of Molecular Liquids, 2019. **295**: p. 111644.
15. Oliveira, M.A., M.L. Peterson, and R.J. Davey, *Relative Enthalpy of Formation for Co-Crystals of Small Organic Molecules*. Crystal Growth & Design, 2011. **11**(2): p. 449-457.

16. Ma, K., Y. Zhang, H. Kan, L. Cheng, L. Luo, Q. Su, J. Gao, Y. Gao, and J. Zhang, *Thermodynamic and Kinetic Investigation on the Crucial Factors Affecting Adefovir Dipivoxil-Saccharin Cocrystallization*. *Pharmaceutical Research*, 2014. **31**(7): p. 1766-1778.
17. Évora, A.O.L., C.E.S. Bernardes, M.F.M. Piedade, A.C.L. Conceição, and M.E. Minas da Piedade, *Energetics of Glycine Cocrystal or Salt Formation with Two Regioisomers: Fumaric Acid and Maleic Acid*. *Crystal Growth & Design*, 2019. **19**(9): p. 5054-5064.
18. Liu, C., C. Wang, S. Wan, L. Liu, C.C. Sun, and F. Qian, *An Elusive Drug–Drug Cocrystal Prepared Using a Heteroseeding Strategy*. *Crystal Growth & Design*, 2021. **21**(10): p. 5659-5668.
19. Surov, A.O., A.P. Voronin, K.V. Drozd, T.V. Volkova, N. Vasilev, D. Batov, A.V. Churakov, and G.L. Perlovich, *Extending the Range of Nitrofurantoin Solid Forms: Effect of Molecular and Crystal Structure on Formation Thermodynamics and Physicochemical Properties*. *Crystal Growth & Design*, 2022. **22**(4): p. 2569-2586.
20. Zhang, S.-W., A.P.J. Brunskill, E. Schwartz, and S. Sun, *Celecoxib–Nicotinamide Cocrystal Revisited: Can Entropy Control Cocrystal Formation?* *Crystal Growth & Design*, 2017. **17**(5): p. 2836-2843.
21. Ahuja, D., M. Svärd, and Å.C. Rasmuson, *Investigation of solid–liquid phase diagrams of the sulfamethazine–salicylic acid co-crystal*. *CrystEngComm*, 2019. **21**(18): p. 2863-2874.
22. Manin, A.N., D.E. Boycov, O.R. Simonova, T.V. Volkova, A.V. Churakov, and G.L. Perlovich, *Formation Thermodynamics of Carbamazepine with Benzamide, Para-Hydroxybenzamide and Isonicotinamide Cocrystals: Experimental and Theoretical Study*. *Pharmaceutics*, 2022. **14**(9): p. 1881.
