# Supplementary material for: Virtual Screening, Structural Analysis, and Formation Thermodynamics of Carbamazepine Cocrystals
Source: Pharmaceutics. 2023 Mar 3;15(3):836. doi: 10.3390/pharmaceutics15030836 (PMC10052035; doi:10.3390/pharmaceutics15030836)
Supplement: Supplementary file 1 [file pharmaceutics-15-00836-s001.zip]

Archive with 7 entries (7 files):
- 2AcAmBA_solv.cif
- 2AcAmBA_solv_checkcif.pdf
- pharmaceutics-2251144-supplementary.pdf
- [CBZ+3AcAmBA].cif
- [CBZ+3AcAmBA]_checkcif.pdf
- [CBZ+4AcAmBA].cif
- [CBZ+4AcAmBA]_checkcif.pdf
