# Supplementary material for: Virtual Screening, Structural Analysis, and Formation Thermodynamics of Carbamazepine Cocrystals
Source: Pharmaceutics. 2023 Mar 3;15(3):836. doi: 10.3390/pharmaceutics15030836 (PMC10052035; doi:10.3390/pharmaceutics15030836)
Supplement: Supplementary file 1 [file pharmaceutics-15-00836-s001.zip › 2AcAmBA_solv.cif]

 
data_a_sq
 
_audit_creation_method            'SHELXL-2018/3'
_shelx_SHELXL_version_number      '2018/3'
_chemical_name_systematic         ?
_chemical_name_common             ?
_chemical_melting_point           ?
_chemical_formula_moiety          'C9 H9 N O3'
_chemical_formula_sum
 'C9 H9 N O3' 
_chemical_formula_weight          179.17

loop_
 _atom_type_symbol
 _atom_type_description
 _atom_type_scat_dispersion_real
 _atom_type_scat_dispersion_imag
 _atom_type_scat_source
 'C'  'C'   0.0033   0.0016
 'International Tables Vol C Tables 4.2.6.8 and 6.1.1.4'
 'H'  'H'   0.0000   0.0000
 'International Tables Vol C Tables 4.2.6.8 and 6.1.1.4'
 'N'  'N'   0.0061   0.0033
 'International Tables Vol C Tables 4.2.6.8 and 6.1.1.4'
 'O'  'O'   0.0106   0.0060
 'International Tables Vol C Tables 4.2.6.8 and 6.1.1.4'
 
_space_group_crystal_system       monoclinic
_space_group_IT_number            15
_space_group_name_H-M_alt         'C 2/c'
_space_group_name_Hall            '-C 2yc'
 
_shelx_space_group_comment
;
The symmetry employed for this shelxl refinement is uniquely defined
by the following loop, which should always be used as a source of
symmetry information in preference to the above space-group names.
They are only intended as comments.
;
 
loop_
 _space_group_symop_operation_xyz
 'x, y, z'
 '-x, y, -z+1/2'
 'x+1/2, y+1/2, z'
 '-x+1/2, y+1/2, -z+1/2'
 '-x, -y, -z'
 'x, -y, z-1/2'
 '-x+1/2, -y+1/2, -z'
 'x+1/2, -y+1/2, z-1/2'
 
_cell_length_a                    14.3522(12)
_cell_length_b                    18.7197(16)
_cell_length_c                    7.4273(6)
_cell_angle_alpha                 90
_cell_angle_beta                  92.155(3)
_cell_angle_gamma                 90
_cell_volume                      1994.1(3)
_cell_formula_units_Z             8
_cell_measurement_temperature     150(2)
_cell_measurement_reflns_used     2275
_cell_measurement_theta_min       2.176
_cell_measurement_theta_max       25.366
 
_exptl_crystal_description        plate
_exptl_crystal_colour             colourless
_exptl_crystal_density_meas       ?
_exptl_crystal_density_method     ?
_exptl_crystal_density_diffrn     1.194          
_exptl_crystal_F_000              752
_exptl_transmission_factor_min    ?
_exptl_transmission_factor_max    ?
_exptl_crystal_size_max           0.150
_exptl_crystal_size_mid           0.150
_exptl_crystal_size_min           0.010
_exptl_absorpt_coefficient_mu     0.091
_shelx_estimated_absorpt_T_min    0.987
_shelx_estimated_absorpt_T_max    0.999
_exptl_absorpt_correction_type    multi-scan
_exptl_absorpt_correction_T_min   0.8366
_exptl_absorpt_correction_T_max   0.9281
_exptl_absorpt_process_details    'SADABS (Bruker, 2016)'
_exptl_absorpt_special_details    ?
_diffrn_ambient_temperature       150(2)
_diffrn_radiation_wavelength      0.71073
_diffrn_radiation_type            MoK\a
_diffrn_source                    ?
_diffrn_measurement_device_type   'Bruker D8 Venture'
_diffrn_measurement_method        \w
_diffrn_detector_area_resol_mean  ?
_diffrn_reflns_number             11010
_diffrn_reflns_av_unetI/netI      0.0355
_diffrn_reflns_av_R_equivalents   0.0471
_diffrn_reflns_limit_h_min        -17
_diffrn_reflns_limit_h_max        17
_diffrn_reflns_limit_k_min        -22
_diffrn_reflns_limit_k_max        22
_diffrn_reflns_limit_l_min        -8
_diffrn_reflns_limit_l_max        8
_diffrn_reflns_theta_min          2.176
_diffrn_reflns_theta_max          25.500
_diffrn_reflns_theta_full         25.242
_diffrn_measured_fraction_theta_max   0.998
_diffrn_measured_fraction_theta_full  0.998
_diffrn_reflns_Laue_measured_fraction_max    0.998
_diffrn_reflns_Laue_measured_fraction_full   0.998
_diffrn_reflns_point_group_measured_fraction_max   0.998
_diffrn_reflns_point_group_measured_fraction_full  0.998
_reflns_number_total              1856
_reflns_number_gt                 1327
_reflns_threshold_expression      'I > 2\s(I)'
_reflns_Friedel_coverage          0.000
_reflns_Friedel_fraction_max      .
_reflns_Friedel_fraction_full     .
 
_reflns_special_details
;
 Reflections were merged by SHELXL according to the crystal
 class for the calculation of statistics and refinement.
 
 Structure factors included contributions from the .fab file.
 
 _reflns_Friedel_fraction is defined as the number of unique
 Friedel pairs measured divided by the number that would be
 possible theoretically, ignoring centric projections and
 systematic absences.
;
 
_computing_data_collection        '<i>APEX3</i> (Bruker, 2018)'
_computing_cell_refinement        'SAINT (Bruker, 2018)'
_computing_data_reduction         'SAINT (Bruker, 2018)'
_computing_structure_solution     'SHELXT (Sheldrick, 2016)'
_computing_structure_refinement 'SHELXL-2018/3 (Sheldrick, 2018)'
_computing_molecular_graphics     ?
_computing_publication_material   ?
_refine_special_details           ?
_refine_ls_structure_factor_coef  Fsqd
_refine_ls_matrix_type            full
_refine_ls_weighting_scheme       calc
_refine_ls_weighting_details
'w=1/[\s^2^(Fo^2^)+(0.0571P)^2^+0.9446P] where P=(Fo^2^+2Fc^2^)/3'
_atom_sites_solution_primary      direct
_atom_sites_solution_secondary    difmap
_atom_sites_solution_hydrogens    difmap
_refine_ls_hydrogen_treatment     refall
_refine_ls_extinction_method      none
_refine_ls_extinction_coef        .
_refine_ls_number_reflns          1856
_refine_ls_number_parameters      154
_refine_ls_number_restraints      0
_refine_ls_R_factor_all           0.0634
_refine_ls_R_factor_gt            0.0414
_refine_ls_wR_factor_ref          0.1168
_refine_ls_wR_factor_gt           0.1033
_refine_ls_goodness_of_fit_ref    1.017
_refine_ls_restrained_S_all       1.017
_refine_ls_shift/su_max           0.000
_refine_ls_shift/su_mean          0.000
 
loop_
 _atom_site_label
 _atom_site_type_symbol
 _atom_site_fract_x
 _atom_site_fract_y
 _atom_site_fract_z
 _atom_site_U_iso_or_equiv
 _atom_site_adp_type
 _atom_site_occupancy
 _atom_site_site_symmetry_order  
 _atom_site_calc_flag
 _atom_site_refinement_flags_posn
 _atom_site_refinement_flags_adp
 _atom_site_refinement_flags_occupancy
 _atom_site_disorder_assembly
 _atom_site_disorder_group
N1 N 0.33053(10) 0.25608(8) 0.6828(2) 0.0329(4) Uani 1 1 d . . . . .
H1 H 0.3860(17) 0.2320(12) 0.650(3) 0.064(7) Uiso 1 1 d . . . . .
O1 O 0.49222(9) 0.23961(8) 0.52988(19) 0.0470(4) Uani 1 1 d . . . . .
O2 O 0.56359(9) 0.33703(8) 0.43213(19) 0.0424(4) Uani 1 1 d . . . . .
H2 H 0.603(2) 0.3009(15) 0.395(4) 0.091(9) Uiso 1 1 d . . . . .
O3 O 0.18983(9) 0.24830(7) 0.81301(18) 0.0414(4) Uani 1 1 d . . . . .
C1 C 0.49211(12) 0.30402(11) 0.5024(2) 0.0344(4) Uani 1 1 d . . . . .
C2 C 0.41414(12) 0.35263(10) 0.5454(2) 0.0317(4) Uani 1 1 d . . . . .
C3 C 0.33405(12) 0.32829(10) 0.6317(2) 0.0308(4) Uani 1 1 d . . . . .
C4 C 0.26210(13) 0.37638(11) 0.6626(3) 0.0374(5) Uani 1 1 d . . . . .
C5 C 0.27002(14) 0.44709(11) 0.6139(3) 0.0419(5) Uani 1 1 d . . . . .
C6 C 0.34862(14) 0.47173(12) 0.5307(3) 0.0420(5) Uani 1 1 d . . . . .
C7 C 0.41930(13) 0.42441(11) 0.4963(3) 0.0377(5) Uani 1 1 d . . . . .
C8 C 0.26433(12) 0.22055(11) 0.7705(2) 0.0341(4) Uani 1 1 d . . . . .
C9 C 0.28716(17) 0.14469(12) 0.8139(3) 0.0448(5) Uani 1 1 d . . . . .
H4 H 0.2055(14) 0.3591(10) 0.719(3) 0.041(5) Uiso 1 1 d . . . . .
H5 H 0.2193(15) 0.4803(11) 0.635(3) 0.044(6) Uiso 1 1 d . . . . .
H6 H 0.3542(14) 0.5228(12) 0.497(3) 0.049(6) Uiso 1 1 d . . . . .
H7 H 0.4750(14) 0.4395(10) 0.437(3) 0.036(5) Uiso 1 1 d . . . . .
H91 H 0.291(2) 0.1350(17) 0.939(5) 0.116(12) Uiso 1 1 d . . . . .
H92 H 0.233(2) 0.1171(16) 0.780(4) 0.099(10) Uiso 1 1 d . . . . .
H93 H 0.3401(19) 0.1264(14) 0.752(4) 0.081(8) Uiso 1 1 d . . . . .
 
loop_
 _atom_site_aniso_label
 _atom_site_aniso_U_11
 _atom_site_aniso_U_22
 _atom_site_aniso_U_33
 _atom_site_aniso_U_23
 _atom_site_aniso_U_13
 _atom_site_aniso_U_12
N1 0.0278(8) 0.0382(9) 0.0332(8) -0.0001(7) 0.0083(6) -0.0013(7)
O1 0.0390(8) 0.0462(10) 0.0572(10) 0.0032(7) 0.0199(7) 0.0047(6)
O2 0.0299(7) 0.0514(9) 0.0468(8) 0.0075(7) 0.0144(6) 0.0025(7)
O3 0.0314(7) 0.0526(9) 0.0411(8) -0.0061(6) 0.0129(6) -0.0039(6)
C1 0.0277(10) 0.0459(12) 0.0301(9) -0.0008(9) 0.0060(7) 0.0004(8)
C2 0.0269(9) 0.0416(11) 0.0266(9) -0.0042(8) 0.0009(7) -0.0021(7)
C3 0.0279(9) 0.0386(11) 0.0260(9) -0.0052(8) 0.0020(7) -0.0009(8)
C4 0.0308(11) 0.0455(12) 0.0364(11) -0.0046(9) 0.0086(8) -0.0002(9)
C5 0.0372(11) 0.0435(12) 0.0450(12) -0.0087(10) 0.0046(9) 0.0056(9)
C6 0.0433(12) 0.0388(12) 0.0441(12) -0.0029(10) 0.0038(9) -0.0007(9)
C7 0.0333(11) 0.0422(12) 0.0378(11) -0.0029(9) 0.0046(8) -0.0049(9)
C8 0.0322(10) 0.0455(11) 0.0248(9) -0.0058(8) 0.0048(7) -0.0059(8)
C9 0.0471(13) 0.0455(13) 0.0426(13) 0.0006(10) 0.0129(10) -0.0058(10)
 
_geom_special_details
;
 All esds (except the esd in the dihedral angle between two l.s. planes)
 are estimated using the full covariance matrix.  The cell esds are taken
 into account individually in the estimation of esds in distances, angles
 and torsion angles; correlations between esds in cell parameters are only
 used when they are defined by crystal symmetry.  An approximate (isotropic)
 treatment of cell esds is used for estimating esds involving l.s. planes.
;
 
loop_
 _geom_bond_atom_site_label_1
 _geom_bond_atom_site_label_2
 _geom_bond_distance
 _geom_bond_site_symmetry_2
 _geom_bond_publ_flag
N1 C8 1.348(2) . ?
N1 C3 1.406(2) . ?
N1 H1 0.95(2) . ?
O1 C1 1.223(2) . ?
O2 C1 1.322(2) . ?
O2 H2 0.93(3) . ?
O3 C8 1.240(2) . ?
C1 C2 1.486(3) . ?
C2 C7 1.395(3) . ?
C2 C3 1.412(2) . ?
C3 C4 1.395(2) . ?
C4 C5 1.378(3) . ?
C4 H4 0.984(19) . ?
C5 C6 1.385(3) . ?
C5 H5 0.97(2) . ?
C6 C7 1.378(3) . ?
C6 H6 0.99(2) . ?
C7 H7 0.97(2) . ?
C8 C9 1.490(3) . ?
C9 H91 0.94(4) . ?
C9 H92 0.96(3) . ?
C9 H93 0.97(3) . ?
 
loop_
 _geom_angle_atom_site_label_1
 _geom_angle_atom_site_label_2
 _geom_angle_atom_site_label_3
 _geom_angle
 _geom_angle_site_symmetry_1
 _geom_angle_site_symmetry_3
 _geom_angle_publ_flag
C8 N1 C3 129.67(16) . . ?
C8 N1 H1 120.0(14) . . ?
C3 N1 H1 110.3(14) . . ?
C1 O2 H2 105.3(18) . . ?
O1 C1 O2 122.05(17) . . ?
O1 C1 C2 124.33(17) . . ?
O2 C1 C2 113.61(18) . . ?
C7 C2 C3 118.77(17) . . ?
C7 C2 C1 119.06(16) . . ?
C3 C2 C1 122.16(17) . . ?
C4 C3 N1 122.80(16) . . ?
C4 C3 C2 119.12(18) . . ?
N1 C3 C2 118.09(16) . . ?
C5 C4 C3 120.50(18) . . ?
C5 C4 H4 120.4(11) . . ?
C3 C4 H4 119.1(11) . . ?
C4 C5 C6 120.9(2) . . ?
C4 C5 H5 120.0(12) . . ?
C6 C5 H5 119.0(12) . . ?
C7 C6 C5 119.1(2) . . ?
C7 C6 H6 120.4(12) . . ?
C5 C6 H6 120.6(12) . . ?
C6 C7 C2 121.61(18) . . ?
C6 C7 H7 121.5(11) . . ?
C2 C7 H7 116.9(11) . . ?
O3 C8 N1 123.14(18) . . ?
O3 C8 C9 121.93(17) . . ?
N1 C8 C9 114.94(17) . . ?
C8 C9 H91 114(2) . . ?
C8 C9 H92 106.4(18) . . ?
H91 C9 H92 100(2) . . ?
C8 C9 H93 113.9(16) . . ?
H91 C9 H93 113(2) . . ?
H92 C9 H93 109(2) . . ?
 
loop_
 _geom_torsion_atom_site_label_1
 _geom_torsion_atom_site_label_2
 _geom_torsion_atom_site_label_3
 _geom_torsion_atom_site_label_4
 _geom_torsion
 _geom_torsion_site_symmetry_1
 _geom_torsion_site_symmetry_2
 _geom_torsion_site_symmetry_3
 _geom_torsion_site_symmetry_4
 _geom_torsion_publ_flag
O1 C1 C2 C7 -175.58(18) . . . . ?
O2 C1 C2 C7 5.2(2) . . . . ?
O1 C1 C2 C3 3.3(3) . . . . ?
O2 C1 C2 C3 -175.95(15) . . . . ?
C8 N1 C3 C4 -2.2(3) . . . . ?
C8 N1 C3 C2 177.80(17) . . . . ?
C7 C2 C3 C4 1.0(3) . . . . ?
C1 C2 C3 C4 -177.89(17) . . . . ?
C7 C2 C3 N1 -179.04(16) . . . . ?
C1 C2 C3 N1 2.1(2) . . . . ?
N1 C3 C4 C5 178.38(17) . . . . ?
C2 C3 C4 C5 -1.7(3) . . . . ?
C3 C4 C5 C6 1.1(3) . . . . ?
C4 C5 C6 C7 0.2(3) . . . . ?
C5 C6 C7 C2 -0.9(3) . . . . ?
C3 C2 C7 C6 0.3(3) . . . . ?
C1 C2 C7 C6 179.19(18) . . . . ?
C3 N1 C8 O3 4.0(3) . . . . ?
C3 N1 C8 C9 -175.81(18) . . . . ?
 
loop_
 _geom_hbond_atom_site_label_D 
 _geom_hbond_atom_site_label_H 
 _geom_hbond_atom_site_label_A 
 _geom_hbond_distance_DH 
 _geom_hbond_distance_HA 
 _geom_hbond_distance_DA 
 _geom_hbond_angle_DHA 
 _geom_hbond_site_symmetry_A 
 _geom_hbond_publ_flag
N1 H1 O1  0.95(2) 1.80(3) 2.640(2) 145(2) . yes
O2 H2 O3  0.93(3) 1.68(3) 2.5958(19) 166(3) 8 yes
 
_refine_diff_density_max    0.426
_refine_diff_density_min   -0.195
_refine_diff_density_rms    0.039

_shelx_res_file
;
TITL a in C2/c
    a_sq.res
    created by SHELXL-2018/3 at 18:29:20 on 23-Aug-2022
CELL  0.71073  14.3522  18.7197   7.4273   90.000   92.155   90.000
ZERR    8.000   0.0012   0.0016   0.0006    0.000    0.003    0.000
LATT  7
SYMM -X, Y, 1/2-Z
SFAC C H N O
UNIT 72 72 8 24
TEMP -123
SIZE .15 .15 .01

EQIV $1 0.5+X, 0.5-Y, -0.5+Z
HTAB N1 O1
HTAB O2 O3_$1

L.S. 5 0   16
BOND $H
ACTA
CONF
FMAP 2
PLAN 12
OMIT -2 51

ABIN
WGHT    0.057100    0.944600
FVAR       0.15274
N1    3    0.330533    0.256078    0.682763    11.00000    0.02784    0.03819 =
         0.03325   -0.00012    0.00828   -0.00129
H1    2    0.386022    0.231986    0.649976    11.00000    0.06380
O1    4    0.492221    0.239612    0.529876    11.00000    0.03895    0.04615 =
         0.05721    0.00316    0.01990    0.00473
O2    4    0.563586    0.337033    0.432126    11.00000    0.02987    0.05139 =
         0.04682    0.00747    0.01441    0.00252
H2    2    0.602947    0.300877    0.395499    11.00000    0.09055
O3    4    0.189830    0.248303    0.813013    11.00000    0.03143    0.05263 =
         0.04114   -0.00609    0.01290   -0.00393
C1    1    0.492108    0.304022    0.502390    11.00000    0.02773    0.04588 =
         0.03006   -0.00077    0.00598    0.00036
C2    1    0.414141    0.352626    0.545383    11.00000    0.02692    0.04156 =
         0.02655   -0.00416    0.00091   -0.00214
C3    1    0.334053    0.328294    0.631680    11.00000    0.02793    0.03862 =
         0.02595   -0.00524    0.00197   -0.00086
C4    1    0.262100    0.376380    0.662603    11.00000    0.03084    0.04551 =
         0.03637   -0.00456    0.00859   -0.00021
C5    1    0.270017    0.447091    0.613852    11.00000    0.03723    0.04354 =
         0.04503   -0.00874    0.00458    0.00555
C6    1    0.348622    0.471733    0.530702    11.00000    0.04326    0.03880 =
         0.04412   -0.00291    0.00384   -0.00069
C7    1    0.419304    0.424414    0.496309    11.00000    0.03329    0.04224 =
         0.03775   -0.00293    0.00464   -0.00485
C8    1    0.264325    0.220548    0.770476    11.00000    0.03224    0.04555 =
         0.02477   -0.00581    0.00481   -0.00591
C9    1    0.287156    0.144694    0.813870    11.00000    0.04710    0.04552 =
         0.04264    0.00059    0.01292   -0.00576
H4    2    0.205485    0.359119    0.719344    11.00000    0.04086
H5    2    0.219316    0.480292    0.635078    11.00000    0.04401
H6    2    0.354163    0.522814    0.496699    11.00000    0.04917
H7    2    0.475025    0.439515    0.436904    11.00000    0.03597
H91   2    0.290903    0.134970    0.938779    11.00000    0.11606
H92   2    0.232563    0.117128    0.779583    11.00000    0.09929
H93   2    0.340089    0.126410    0.751728    11.00000    0.08109
HKLF 4


REM  a in C2/c
REM wR2 = 0.1168, GooF = S = 1.017, Restrained GooF = 1.017 for all data
REM R1 = 0.0414 for 1327 Fo > 4sig(Fo) and 0.0634 for all 1856 data
REM 154 parameters refined using 0 restraints

END

WGHT      0.0571      0.9446

REM Highest difference peak  0.426,  deepest hole -0.195,  1-sigma level  0.039
Q1    1   0.5000  0.1581  0.7500  10.50000  0.05    0.43
Q2    1   0.4670  0.2493  0.4134  11.00000  0.05    0.21
Q3    1   0.3597  0.1472  0.9026  11.00000  0.05    0.20
Q4    1   0.4560  0.3309  0.5671  11.00000  0.05    0.18
Q5    1   0.2178  0.4693  0.7500  11.00000  0.05    0.14
Q6    1   0.3783  0.3361  0.5505  11.00000  0.05    0.13
Q7    1   0.4279  0.5364  0.5546  11.00000  0.05    0.13
Q8    1   0.3984  0.3510  0.6222  11.00000  0.05    0.13
Q9    1   0.2207  0.1233  0.9034  11.00000  0.05    0.13
Q10   1   0.2512  0.1325  0.9305  11.00000  0.05    0.12
Q11   1   0.4235  0.3836  0.5633  11.00000  0.05    0.12
Q12   1   0.5000  0.3494  0.7500  10.50000  0.05    0.12
;
_shelx_res_checksum   23315

_shelx_hkl_file
;
  -2   0   0    1.67    0.22
   2   0   0    1.63    0.21
  -2   0   0    1.83    0.21
   2   0   0    2.05    0.22
   2   0   0    1.72    0.13
  -4   0   0  590.44   14.64
  -4   0   0  587.30   14.68
   4   0   0  589.49   14.66
   6   0   0   64.54    2.18
   6   0   0   64.76    2.16
  -6   0   0   64.94    2.14
  -6   0   0   66.12    2.22
  -8   0   0    0.31    0.43
   8   0   0    0.06    0.35
  10   0   0    9.59    1.00
 -10   0   0   13.50    1.11
 -12   0   0  126.55    4.34
  14   0   0   12.71    1.37
 -14   0   0   13.49    1.51
  16   0   0    3.34    0.97
 -16   0   0    2.78    0.92
   3  -1   0  214.83    5.47
   3  -1   0  217.53    5.29
  -3  -1   0  213.12    5.44
  -3  -1   0  213.39    5.26
   3  -1   0  208.37    5.45
  -3  -1   0  212.93    5.49
  -3   1   0  212.95    5.46
   3   1   0  208.26    5.43
  -3   1   0  215.21    5.47
   3   1   0  216.10    5.28
   3   1   0  212.64    5.48
  -3   1   0  209.15    5.24
  -5  -1   0  121.71    3.05
   5  -1   0  118.41    3.40
   5  -1   0  123.45    3.41
  -5  -1   0  117.52    3.43
  -5  -1   0  120.47    3.38
   5   1   0  121.72    3.44
   5   1   0  119.54    3.38
   5   1   0  120.79    3.09
  -5   1   0  121.73    3.43
  -5   1   0  116.94    3.39
  -7  -1   0   39.28    1.09
  -7  -1   0   39.76    1.69
   7  -1   0   36.76    1.56
   7  -1   0   37.65    1.57
  -7  -1   0   36.61    1.51
   7   1   0   35.68    1.54
   7   1   0   37.85    1.75
  -7   1   0   36.81    1.62
  -7   1   0   36.88    1.56
  -9  -1   0   23.02    1.38
   9  -1   0   22.96    1.30
   9   1   0   25.77    1.33
  -9   1   0   26.66    1.42
 -11  -1   0    0.74    0.58
  11  -1   0    1.29    0.54
  11   1   0    1.70    0.57
 -11   1   0    1.91    0.65
  13  -1   0   21.98    1.56
 -13  -1   0   20.43    1.66
 -13   1   0   20.75    1.68
  13   1   0   20.79    1.52
  15  -1   0    2.12    0.82
 -15  -1   0    3.97    1.00
 -15   1   0    0.77    0.69
  15   1   0    3.05    0.86
 -17  -1   0    0.15    0.77
  17  -1   0    0.29    0.68
  17   1   0    0.24    0.70
 -17   1   0   -0.61    0.72
   0   2   0  450.25   15.79
  -2  -2   0   31.00    0.88
   2  -2   0   29.62    0.96
  -2  -2   0   28.76    0.99
   2  -2   0   30.10    0.86
   2  -2   0   29.19    0.96
  -2   2   0   30.03    0.96
   2   2   0   28.02    0.92
   2   2   0   28.76    0.98
   2   2   0   30.14    0.88
  -2   2   0   30.33    0.86
  -2   2   0   29.56    0.97
   4  -2   0   31.72    0.95
   4  -2   0   31.61    1.16
  -4  -2   0   33.60    0.96
   4  -2   0   32.26    1.17
  -4  -2   0   33.04    1.14
  -4  -2   0   29.84    1.18
  -4   2   0   33.63    1.19
   4   2   0   32.79    0.98
   4   2   0   32.67    1.14
   4   2   0   33.74    1.22
  -4   2   0   31.80    0.93
  -4   2   0   31.54    1.18
  -6  -2   0  107.01    3.25
   6  -2   0  112.63    3.23
  -6  -2   0  106.88    2.80
   6  -2   0  102.37    3.18
  -6  -2   0  106.18    3.16
  -6   2   0  103.02    2.79
   6   2   0  101.49    3.20
  -6   2   0  114.54    3.29
  -6   2   0  108.56    2.75
   6   2   0  107.92    3.17
   6   2   0  109.10    2.86
  -6   2   0  106.27    3.19
  -8  -2   0   20.56    1.27
   8  -2   0   23.17    1.20
  -8  -2   0   20.63    0.74
   8   2   0   21.26    1.16
  -8   2   0   20.24    1.26
   8   2   0   22.16    0.82
  10  -2   0   16.58    1.20
 -10  -2   0   17.08    1.32
  10   2   0   18.21    1.19
 -10   2   0   18.20    1.29
  12  -2   0   14.24    1.24
 -12  -2   0   16.19    1.54
 -12   2   0   11.34    1.30
  12   2   0   14.56    1.24
  14  -2   0    1.71    0.79
 -14  -2   0    2.30    0.84
  14   2   0    3.34    0.90
 -14   2   0    1.53    0.79
 -16  -2   0    9.60    1.43
  16  -2   0    7.23    1.20
 -16   2   0    6.50    1.23
  16   2   0    8.29    1.30
   1  -3   0  324.99    7.92
   1  -3   0  328.95    7.92
  -1  -3   0  307.22    7.94
  -1  -3   0  319.00    7.88
  -1   3   0  321.18    7.92
   1   3   0  316.89    7.88
  -1   3   0  315.34    7.90
   1   3   0  316.24    7.94
   3  -3   0  153.01    4.02
   3  -3   0  147.92    3.86
   3  -3   0  153.61    4.02
  -3  -3   0  154.06    3.89
  -3  -3   0  147.26    4.05
  -3   3   0  155.18    3.87
   3   3   0  150.26    3.97
  -3   3   0  150.26    4.01
  -3   3   0  156.02    4.03
   3   3   0  148.45    4.04
   3   3   0  149.86    3.90
   5  -3   0   23.61    1.04
   5  -3   0   22.95    1.06
   5  -3   0   22.80    0.80
  -5  -3   0   23.04    0.98
  -5  -3   0   22.65    1.08
  -5  -3   0   24.32    0.82
  -5   3   0   22.93    1.06
  -5   3   0   24.66    0.79
   5   3   0   24.00    1.01
   5   3   0   23.84    0.85
  -7  -3   0    2.20    0.46
   7  -3   0    1.79    0.52
  -7  -3   0    3.69    0.37
   7  -3   0    3.30    0.57
  -7  -3   0    2.53    0.57
  -7   3   0    3.72    0.33
   7   3   0    3.26    0.56
   7   3   0    2.65    0.36
  -7   3   0    2.71    0.59
   9  -3   0   19.97    1.21
  -9  -3   0   20.98    0.78
  -9  -3   0   20.45    1.30
   9   3   0   23.23    1.24
  -9   3   0   20.22    1.27
   9   3   0   21.03    0.86
  11  -3   0   27.00    1.54
 -11  -3   0   24.94    1.63
  11   3   0   24.95    1.51
 -11   3   0   24.92    1.60
 -13  -3   0    1.74    0.78
  13  -3   0    1.20    0.68
  13   3   0    3.06    0.78
 -13   3   0    1.85    0.79
  15  -3   0    1.78    0.79
 -15  -3   0    0.94    0.73
  15   3   0    0.94    0.68
 -15   3   0    1.23    0.81
 -17  -3   0    3.48    1.07
  17  -3   0    3.29    0.99
 -17   3   0    2.52    1.02
  17   3   0    3.95    1.04
   0  -4   0  109.36    2.93
   0  -4   0  107.64    2.87
   0  -4   0  113.97    2.92
   0   4   0  110.87    2.87
   0   4   0  106.78    2.91
   2  -4   0    0.30    0.21
  -2  -4   0    0.15    0.23
  -2  -4   0    0.04    0.17
   2  -4   0    0.33    0.19
   2  -4   0    0.32    0.22
  -2  -4   0   -0.01    0.17
   2   4   0    0.29    0.18
  -2   4   0    0.35    0.21
   2   4   0    0.74    0.26
  -2   4   0    0.37    0.20
  -2   4   0    0.27    0.23
   2   4   0    0.44    0.18
   4  -4   0    5.88    0.50
  -4  -4   0    5.57    0.56
  -4  -4   0    5.84    0.41
   4  -4   0    6.24    0.51
   4  -4   0    5.37    0.38
  -4   4   0    5.85    0.62
   4   4   0    6.29    0.43
   4   4   0    6.48    0.56
   4   4   0    6.64    0.49
  -4   4   0    6.45    0.40
   4   4   0    5.55    0.47
  -4   4   0    6.20    0.51
  -6  -4   0  432.81   10.84
  -6  -4   0  424.82   11.10
  -6  -4   0  436.37   11.27
   6  -4   0  433.74   10.83
   6  -4   0  441.83   11.21
   6  -4   0  429.47   11.16
   6   4   0  438.42   10.89
   6   4   0  441.79   11.12
   6   4   0  424.60   11.22
  -6   4   0  448.52   11.23
  -6   4   0  430.79   11.20
  -6   4   0  436.03   10.79
  -8  -4   0    9.64    0.98
  -8  -4   0    9.36    0.55
   8  -4   0   10.04    0.95
   8  -4   0   10.25    0.55
   8   4   0    9.55    0.60
  -8   4   0    9.89    0.52
  -8   4   0   10.28    0.98
   8   4   0    9.43    0.90
  10  -4   0    6.57    0.92
 -10  -4   0    7.22    0.49
 -10  -4   0    6.84    0.94
  10   4   0    6.78    0.85
 -10   4   0    7.57    0.96
  10   4   0    7.28    0.56
 -12  -4   0    2.32    0.78
  12  -4   0    3.19    0.75
 -12   4   0    2.51    0.81
  12   4   0    2.76    0.74
  14  -4   0    1.69    0.73
 -14  -4   0    3.28    0.94
  14   4   0    3.64    0.85
 -14   4   0    1.90    0.83
  16  -4   0    2.20    0.87
 -16  -4   0    1.89    0.95
 -16   4   0    2.21    0.96
  16   4   0    0.43    0.64
   1  -5   0   32.43    1.09
  -1  -5   0   33.37    1.12
   1  -5   0   33.35    1.12
  -1  -5   0   31.58    1.14
  -1  -5   0   32.55    1.05
   1  -5   0   33.40    1.14
   1  -5   0   33.31    1.12
  -1   5   0   35.49    1.13
   1   5   0   34.30    1.14
   1   5   0   32.47    1.15
   1   5   0   32.66    1.06
  -1   5   0   32.54    1.07
   3  -5   0   10.43    0.54
  -3  -5   0    9.89    0.54
   3  -5   0   11.14    0.63
   3  -5   0    9.23    0.59
   3   5   0   10.78    0.57
  -3   5   0   10.06    0.54
  -3   5   0   10.18    0.63
  -3   5   0   10.62    0.60
   3   5   0   10.04    0.56
   3   5   0   10.26    0.66
   5  -5   0   13.74    0.69
  -5  -5   0   13.27    0.94
   5  -5   0   13.78    0.88
  -5  -5   0   15.03    0.73
   5   5   0   14.65    0.83
  -5   5   0   12.97    0.93
  -5   5   0   13.15    0.83
   5   5   0   15.11    0.98
  -5   5   0   13.96    0.69
   5   5   0   13.06    0.77
   5   5   0   15.03    0.77
   7  -5   0   54.30    1.68
  -7  -5   0   52.00    1.68
  -7  -5   0   55.59    2.12
   7  -5   0   51.97    2.01
   7   5   0   53.93    1.88
  -7   5   0   52.39    2.05
   7   5   0   54.25    1.95
  -7   5   0   56.72    1.65
   9  -5   0   23.29    0.93
  -9  -5   0   24.32    1.41
  -9  -5   0   22.31    0.93
   9  -5   0   23.34    1.34
   9   5   0   22.70    1.27
  -9   5   0   23.65    1.41
  -9   5   0   23.36    0.88
   9   5   0   24.55    1.04
 -11  -5   0    4.69    0.50
 -11  -5   0    3.81    0.79
  11  -5   0    4.74    0.82
  11   5   0    5.46    0.58
 -11   5   0    5.15    0.94
  11   5   0    4.56    0.81
  13  -5   0    0.91    0.65
 -13  -5   0   -0.12    0.61
 -13   5   0    0.40    0.63
  13   5   0    0.00    0.53
  15  -5   0    2.76    0.86
 -15  -5   0    1.15    0.91
 -15   5   0    3.92    1.04
  15   5   0    2.55    0.85
  17  -5   0   -0.51    0.63
 -17  -5   0   -0.03    0.66
  17   5   0    0.64    0.73
 -17   5   0    0.61    0.82
   0  -6   0   19.33    0.79
   0  -6   0   20.16    0.88
   0  -6   0   19.70    0.82
   0   6   0   20.31    0.78
   0   6   0   20.38    0.87
   0   6   0   22.15    0.88
   2  -6   0   15.72    0.75
  -2  -6   0   14.53    0.76
   2  -6   0   15.11    0.73
  -2  -6   0   14.21    0.71
   2  -6   0   14.62    0.71
  -2  -6   0   15.78    0.67
  -2   6   0   16.15    0.72
   2   6   0   15.76    0.80
   2   6   0   15.28    0.68
   2   6   0   16.72    0.75
   4  -6   0   56.49    1.77
  -4  -6   0   59.09    1.81
   4  -6   0   56.44    1.91
   4  -6   0   58.14    1.93
  -4  -6   0   57.00    1.99
   4   6   0   56.00    1.83
  -4   6   0   57.72    1.95
   4   6   0   56.49    1.84
   4   6   0   57.85    1.98
   4   6   0   58.91    1.85
   6  -6   0   47.87    1.83
   6  -6   0   45.99    1.78
   6  -6   0   43.62    1.52
  -6  -6   0   48.84    1.89
  -6  -6   0   46.41    1.56
  -6   6   0   47.83    1.83
   6   6   0   47.32    1.63
   6   6   0   48.19    1.72
   6   6   0   45.40    1.70
   8  -6   0    8.23    0.58
   8  -6   0    8.96    0.92
  -8  -6   0    7.92    0.90
  -8   6   0    7.89    0.90
   8   6   0    7.88    0.64
   8   6   0    8.21    0.85
 -10  -6   0   20.79    1.16
  10  -6   0   20.01    0.89
 -10  -6   0   18.67    1.37
  10  -6   0   20.50    1.36
 -10   6   0   18.95    0.85
  10   6   0   20.07    1.26
  10   6   0   18.61    1.00
 -12  -6   0    3.22    0.85
  12  -6   0    4.51    0.88
 -12   6   0    3.59    0.88
  12   6   0    3.32    0.75
  12   6   0    3.55    0.53
  14  -6   0    4.54    0.97
 -14  -6   0    5.45    1.07
  14   6   0    4.12    0.92
 -14   6   0    6.77    1.22
 -16  -6   0    2.93    1.01
  16  -6   0    2.59    0.93
 -16   6   0    1.95    0.89
  16   6   0    3.69    0.99
   1  -7   0    3.44    0.42
   1  -7   0    3.99    0.47
  -1  -7   0    4.08    0.55
   1  -7   0    4.41    0.48
  -1  -7   0    4.63    0.45
   1  -7   0    3.79    0.44
  -1   7   0    3.95    0.46
   1   7   0    4.31    0.50
  -1   7   0    4.66    0.44
   1   7   0    3.95    0.41
   1   7   0    4.67    0.50
  -3  -7   0    6.57    0.58
  -3  -7   0    5.93    0.64
   3  -7   0    6.18    0.63
   3  -7   0    5.79    0.56
  -3  -7   0    6.49    0.55
   3  -7   0    5.18    0.57
  -3   7   0    6.86    0.61
  -3   7   0    6.73    0.66
   3   7   0    5.39    0.56
   3   7   0    6.46    0.56
  -3   7   0    6.72    0.61
   5  -7   0   21.98    0.99
   5  -7   0   22.94    1.16
  -5  -7   0   22.63    1.24
  -5  -7   0   21.61    1.00
   5  -7   0   21.74    1.11
  -5   7   0   22.54    1.18
   5   7   0   23.01    1.07
   5   7   0   22.41    1.07
   5   7   0   21.25    1.05
  -5   7   0   22.66    1.01
   5   7   0   22.91    1.22
  -5   7   0   21.67    1.10
   7  -7   0    0.70    0.28
   7  -7   0    0.33    0.39
  -7  -7   0    0.36    0.27
  -7  -7   0    0.48    0.43
   7   7   0    0.47    0.31
  -7   7   0    0.64    0.32
  -7   7   0    0.09    0.42
   7   7   0    0.25    0.31
   7   7   0    0.30    0.35
   9  -7   0    3.85    0.47
  -9  -7   0    3.49    0.49
  -9  -7   0    4.79    1.18
  -9   7   0    3.61    0.73
   9   7   0    3.74    0.68
   9   7   0    4.33    0.60
  -9   7   0    4.37    0.50
 -11  -7   0    1.62    0.68
  11  -7   0    0.71    0.58
 -11  -7   0    0.47    0.36
 -11   7   0    0.88    0.34
 -11   7   0   -0.29    0.60
  11   7   0    0.81    0.54
  11   7   0    1.13    0.42
 -13  -7   0    1.41    0.39
 -13  -7   0    2.63    0.86
  13  -7   0    1.58    0.73
 -13   7   0    1.86    0.83
  13   7   0    2.18    0.75
  13   7   0    1.79    0.49
  15  -7   0    1.40    0.73
 -15  -7   0    0.79    0.75
 -15   7   0    1.29    0.89
  15   7   0    1.78    0.80
 -17  -7   0    3.25    1.04
  17  -7   0   -0.91    0.61
 -17   7   0    0.97    0.95
  17   7   0    0.99    0.79
   0  -8   0  142.14    3.86
   0  -8   0  135.32    3.96
   0  -8   0  140.46    3.95
   0   8   0  143.34    3.96
   0   8   0  142.44    3.96
   0   8   0  144.81    3.84
  -2  -8   0   76.53    2.51
   2  -8   0   80.94    2.46
   2  -8   0   81.18    2.46
   2  -8   0   84.27    2.53
  -2  -8   0   81.79    2.47
  -2  -8   0   78.27    2.35
   2  -8   0   79.71    2.46
   2   8   0   76.37    2.70
   2   8   0   77.70    2.36
   2   8   0   80.18    2.49
  -2   8   0   77.87    2.39
  -2   8   0   84.94    2.50
   4  -8   0   10.53    0.72
   4  -8   0    9.25    0.78
  -4  -8   0    8.73    0.84
  -4  -8   0    9.15    0.71
   4  -8   0   10.52    0.82
   4   8   0    9.63    0.76
   4   8   0    9.07    0.85
  -4   8   0   10.50    0.75
  -4   8   0    9.44    0.83
   4   8   0    9.50    0.70
  -4   8   0    8.42    0.73
   6  -8   0   33.57    1.48
   6  -8   0   30.71    1.25
  -6  -8   0   28.61    1.49
  -6  -8   0   29.58    1.25
   6   8   0   34.43    1.38
  -6   8   0   32.25    1.27
   6   8   0   33.28    1.37
   6   8   0   31.41    1.34
  -6   8   0   30.30    1.46
   8  -8   0    1.57    0.53
   8  -8   0    0.65    0.30
  -8  -8   0    0.42    0.31
  -8  -8   0    0.88    0.50
   8   8   0    1.16    0.45
  -8   8   0    0.22    0.30
   8   8   0    0.79    0.38
  -8   8   0    0.12    0.47
 -10  -8   0    5.52    0.95
  10  -8   0    5.94    0.94
  10  -8   0    5.81    0.62
 -10   8   0    5.46    0.92
  10   8   0    4.62    0.76
 -10   8   0    5.58    0.62
  10   8   0    6.00    0.73
 -12  -8   0    0.03    0.56
  12  -8   0   -0.09    0.60
  12   8   0    0.33    0.44
 -12   8   0   -0.44    0.31
  12   8   0   -0.16    0.51
 -12   8   0    0.53    0.67
  14  -8   0    0.69    0.70
 -14  -8   0    3.17    0.51
 -14  -8   0    5.99    1.21
 -14   8   0    3.15    0.94
  14   8   0    3.72    0.63
  14   8   0    3.29    0.83
  16  -8   0    0.48    0.71
 -16  -8   0    1.50    0.80
 -16   8   0    0.74    0.81
  16   8   0    0.01    0.67
   1  -9   0  134.38    3.96
  -1  -9   0  138.15    3.85
   1  -9   0  144.00    4.02
  -1  -9   0  136.84    3.97
   1  -9   0  145.35    3.93
  -1  -9   0  139.23    4.03
   1  -9   0  137.30    4.10
  -1   9   0  143.74    4.00
   1   9   0  141.49    4.02
  -1   9   0  137.20    3.85
   1   9   0  138.20    3.83
   1   9   0  142.24    4.19
   3  -9   0    7.37    0.73
  -3  -9   0    6.95    0.59
   3  -9   0    6.31    0.67
  -3  -9   0    4.90    0.68
   3  -9   0    5.40    0.62
   3  -9   0    4.95    0.66
  -3   9   0    6.10    0.61
   3   9   0    6.02    0.64
   3   9   0    6.15    0.60
  -3   9   0    7.32    0.71
   3   9   0    6.05    0.71
   5  -9   0    0.08    0.35
   5  -9   0    0.09    0.26
   5  -9   0   -0.13    0.38
  -5  -9   0   -0.51    0.33
   5   9   0    0.21    0.33
  -5   9   0   -0.33    0.30
   5   9   0   -0.36    0.25
   5   9   0    0.15    0.31
  -5   9   0   -0.35    0.36
   7  -9   0    8.39    0.67
   7  -9   0    8.37    0.92
  -7  -9   0    9.41    0.98
   7   9   0    8.52    0.84
  -7   9   0    8.47    0.93
   7   9   0    8.20    0.80
  -7   9   0    8.75    0.72
   9  -9   0    0.34    0.49
   9  -9   0    1.08    0.36
  -9  -9   0    1.04    0.57
  -9   9   0    0.14    0.36
   9   9   0    0.17    0.45
  -9   9   0    0.03    0.56
   9   9   0    0.59    0.40
  11  -9   0   -0.09    0.29
 -11  -9   0   -0.31    0.55
  11  -9   0   -0.07    0.52
 -11   9   0    0.41    0.38
  11   9   0    0.66    0.47
 -11   9   0   -0.38    0.59
  11   9   0    0.75    0.55
 -13  -9   0   10.40    1.36
  13  -9   0   11.66    1.42
  13   9   0   12.50    1.02
 -13   9   0   10.70    0.80
 -13   9   0   14.45    1.59
  13   9   0   10.84    1.24
  15  -9   0    0.79    0.72
 -15  -9   0    0.05    0.66
 -15   9   0    0.60    0.89
  15   9   0    0.04    0.54
  15   9   0    0.39    0.45
   0 -10   0  356.50    9.33
   0 -10   0  364.68    9.23
   0  10   0  347.36    9.31
   0  10   0  363.50    9.17
  -2 -10   0   28.25    1.16
  -2 -10   0   28.77    1.36
   2 -10   0   26.89    1.24
   2 -10   0   27.09    1.33
   2 -10   0   27.89    1.27
   2  10   0   29.18    1.18
  -2  10   0   27.47    1.18
   2  10   0   28.47    1.32
  -2  10   0   28.48    1.30
   2  10   0   29.20    1.34
   4 -10   0   -0.19    0.31
  -4 -10   0   -0.06    0.26
  -4 -10   0    0.13    0.39
   4 -10   0   -0.32    0.31
   4  10   0    0.04    0.31
  -4  10   0   -0.13    0.33
  -4  10   0    0.25    0.35
  -6 -10   0    1.88    0.58
   6 -10   0    0.68    0.45
  -6  10   0    1.09    0.43
   6  10   0    1.04    0.41
   6  10   0    1.80    0.45
   6  10   0    0.45    0.36
  -6  10   0    1.30    0.50
   8 -10   0   35.90    2.27
  -8 -10   0   32.65    1.75
   8  10   0   32.94    1.55
   8  10   0   31.72    1.54
  -8  10   0   30.45    1.38
  -8  10   0   33.94    1.72
 -10 -10   0    2.26    0.78
  10 -10   0    1.79    0.67
 -10  10   0    2.35    0.80
 -10  10   0    2.14    0.51
  10  10   0    2.40    0.72
  10  10   0    2.05    0.59
 -12 -10   0    1.97    0.75
  12 -10   0    0.95    0.67
  12  10   0    1.04    0.59
 -12  10   0    1.23    0.79
 -12  10   0    1.80    0.50
  12  10   0    2.13    0.61
 -14 -10   0   -0.51    0.55
  14 -10   0    0.56    0.68
  14  10   0    1.08    0.53
  14  10   0   -0.40    0.52
 -14  10   0   -0.58    0.73
 -14  10   0   -0.68    0.33
 -16 -10   0    0.61    0.81
  16 -10   0   -0.59    0.72
  16  10   0    1.27    0.65
  16  10   0    0.61    0.69
 -16  10   0    0.41    0.86
  -1 -11   0   14.50    0.86
  -1 -11   0   15.29    1.04
   1 -11   0   14.37    1.01
   1 -11   0   14.65    0.93
   1 -11   0   14.88    0.90
  -1  11   0   15.78    0.85
   1  11   0   15.01    0.98
   1  11   0   14.47    0.82
  -1  11   0   14.51    0.98
   1  11   0   14.34    0.98
   3 -11   0    9.36    0.77
   3 -11   0    6.63    0.75
   3 -11   0    6.49    0.71
  -3 -11   0    7.52    0.61
  -3 -11   0    8.37    0.85
  -3  11   0    8.01    0.67
  -3  11   0    7.46    0.78
   3  11   0    7.92    0.84
   5 -11   0    9.68    0.95
  -5 -11   0    9.79    0.98
  -5  11   0   12.16    0.87
   5  11   0   11.94    0.91
   5  11   0   11.07    0.80
   7 -11   0    1.25    0.59
  -7  11   0    1.71    0.61
  -7  11   0    2.21    0.56
   7  11   0    1.07    0.49
   7  11   0    2.50    0.55
  -9 -11   0    0.41    0.55
   9 -11   0    0.74    0.57
  -9  11   0    0.34    0.65
   9  11   0   -0.51    0.38
   9  11   0    1.70    0.55
  -9  11   0    0.10    0.46
  11 -11   0    0.91    0.64
 -11 -11   0   -0.06    0.59
  11  11   0   -0.18    0.47
 -11  11   0   -0.42    0.42
  11  11   0    0.44    0.53
 -11  11   0    1.21    0.75
 -13 -11   0    1.02    0.76
  13 -11   0   -0.54    0.59
  13  11   0    0.55    0.55
  13  11   0    0.17    0.54
 -13  11   0   -0.28    0.39
 -13  11   0   -0.22    0.72
  15 -11   0    1.20    0.81
 -15 -11   0    2.93    1.01
 -15  11   0    1.13    0.88
 -15  11   0    1.21    0.45
  15  11   0    2.22    0.80
  15  11   0    1.71    0.62
   0 -12   0   53.99    1.90
   0 -12   0   53.05    2.06
   0  12   0   56.05    1.87
   0  12   0   51.59    2.03
   2 -12   0   27.08    1.27
  -2 -12   0   25.41    1.17
   2 -12   0   28.14    1.40
  -2 -12   0   26.06    1.38
   2  12   0   26.66    1.36
  -2  12   0   25.80    1.34
   2  12   0   28.52    1.19
  -2  12   0   26.59    1.19
   4 -12   0   16.93    1.18
  -4 -12   0   19.98    1.04
  -4 -12   0   18.90    1.22
   4 -12   0   20.17    1.17
   4  12   0   20.21    1.20
   4  12   0   19.55    1.05
  -4  12   0   18.77    1.15
  -6 -12   0   22.61    1.42
   6 -12   0   21.85    1.32
   6  12   0   20.79    1.29
  -6  12   0   21.21    1.23
  -6  12   0   21.06    1.36
   6  12   0   22.03    1.19
  -8 -12   0   58.05    2.52
   8 -12   0   55.41    2.42
  -8  12   0   57.21    2.17
   8  12   0   59.03    2.25
   8  12   0   55.10    2.50
 -10 -12   0    2.60    0.76
  10 -12   0    2.93    0.77
  10  12   0    2.59    0.67
 -10  12   0    2.71    0.87
 -10  12   0    3.46    0.64
  10  12   0    2.68    0.71
 -12 -12   0    5.31    1.10
  12 -12   0    4.26    0.97
 -12  12   0    4.67    0.73
  12  12   0    6.00    0.92
  12  12   0    3.94    0.86
 -12  12   0    4.46    1.00
 -14 -12   0    1.27    0.74
  14 -12   0    0.96    0.78
  14  12   0   -0.45    0.58
 -14  12   0   -0.21    0.42
  14  12   0   -0.29    0.53
   1 -13   0    0.23    0.48
  -1 -13   0    0.45    0.48
   1 -13   0   -0.27    0.31
  -1 -13   0    0.78    0.34
   1  13   0   -0.45    0.32
  -1  13   0    0.36    0.41
  -1  13   0    0.01    0.32
   1  13   0   -0.15    0.29
   3 -13   0    2.09    0.54
   3 -13   0    2.66    0.63
  -3 -13   0    2.24    0.48
  -3 -13   0    1.68    0.55
   3  13   0    1.53    0.73
  -3  13   0    2.07    0.54
   3  13   0    2.33    0.48
   5 -13   0   53.07    2.12
   5 -13   0   52.79    2.16
  -5 -13   0   50.09    2.18
   5  13   0   50.01    2.15
  -5  13   0   49.67    2.05
  -7 -13   0   21.57    1.51
   7 -13   0   22.10    1.44
  -7  13   0   17.82    1.40
  -7  13   0   18.66    1.25
   7  13   0   19.74    1.22
   7  13   0   19.19    1.34
   9 -13   0   31.17    1.90
  -9 -13   0   33.04    1.97
  -9  13   0   34.76    1.66
  -9  13   0   33.86    1.92
   9  13   0   34.84    1.82
   9  13   0   36.57    1.75
 -11 -13   0    6.23    1.12
  11 -13   0    4.46    1.00
  11  13   0    5.58    0.92
  11  13   0    6.17    0.97
 -11  13   0    5.13    0.79
 -11  13   0    4.84    1.02
  13 -13   0    2.49    0.92
 -13 -13   0    0.89    0.77
  13  13   0    1.02    0.61
 -13  13   0    2.38    0.94
  13  13   0    0.87    0.63
 -13  13   0    1.14    0.55
   0 -14   0   10.37    0.83
   0 -14   0   10.62    1.08
   0  14   0    8.84    0.77
   0  14   0    7.41    0.86
   2 -14   0    0.72    0.55
  -2 -14   0    0.57    0.39
   2 -14   0    0.70    0.46
  -2 -14   0    0.67    0.51
  -2  14   0    0.45    0.41
   2  14   0    0.60    0.45
   2  14   0    0.90    0.39
   4 -14   0    1.73    0.61
  -4 -14   0    1.18    0.47
   4 -14   0    1.23    0.54
  -4 -14   0    0.96    0.58
  -4  14   0    1.37    0.58
   4  14   0    1.05    0.50
   6 -14   0   80.94    2.95
   6 -14   0   79.71    3.61
  -6 -14   0   74.17    2.95
   6  14   0   70.88    2.85
  -6  14   0   76.89    2.79
   6  14   0   76.80    2.65
  -8 -14   0    0.71    0.68
   8 -14   0    0.01    0.60
  -8  14   0    0.99    0.55
   8  14   0    0.76    0.56
   8  14   0    1.03    0.57
  -8  14   0    0.51    0.67
  10 -14   0    3.86    0.95
 -10 -14   0    1.47    0.76
  10  14   0    2.07    0.68
  10  14   0    2.03    0.72
 -10  14   0    1.39    0.58
 -10  14   0    2.29    0.85
 -12 -14   0    0.73    0.70
 -12  14   0    0.65    0.61
  12  14   0   -0.59    0.51
 -12  14   0    0.26    0.74
  12  14   0    0.14    0.50
  14 -14   0    2.11    0.91
 -14 -14   0    2.71    0.97
  14  14   0    1.35    0.66
  14  14   0    1.79    0.74
 -14  14   0    0.55    0.88
   1 -15   0   -0.14    0.45
  -1 -15   0    0.65    0.54
   1 -15   0   -0.20    0.51
  -1 -15   0   -0.16    0.37
   1  15   0   -0.38    0.42
  -1  15   0    0.45    0.49
   3 -15   0   34.29    1.70
   3 -15   0   37.94    1.83
  -3 -15   0   34.44    1.52
  -3 -15   0   36.06    1.83
  -3  15   0   35.11    1.76
   3  15   0   34.88    1.82
   5 -15   0    0.02    0.55
   5 -15   0    0.69    0.58
  -5 -15   0    0.24    0.57
  -5  15   0    0.66    0.51
   5  15   0    0.14    0.52
   7 -15   0    0.86    0.64
  -7 -15   0    1.19    0.69
   7 -15   0    0.96    0.68
  -7  15   0    0.58    0.55
   7  15   0    1.94    0.58
   7  15   0    1.38    0.65
  -9 -15   0   28.65    1.87
   9 -15   0   28.80    1.83
  -9  15   0   28.15    1.62
   9  15   0   27.53    1.75
  11 -15   0    1.67    0.80
 -11 -15   0    1.16    0.77
 -11  15   0    2.04    0.85
  11  15   0    2.02    0.68
  11  15   0    1.54    0.71
 -11  15   0    1.07    0.63
  13 -15   0    0.81    0.83
 -13 -15   0    0.91    0.74
 -13  15   0    2.93    1.55
  13  15   0    1.42    0.77
  13  15   0    1.56    0.66
 -13  15   0    0.69    0.60
   0 -16   0    2.64    0.62
   0 -16   0    4.30    0.84
   0  16   0    1.78    0.65
  -2 -16   0    0.85    0.48
   2 -16   0    1.79    0.70
   2 -16   0    1.54    0.60
  -2 -16   0    1.20    0.77
  -2  16   0    0.73    0.56
   2  16   0    2.04    0.68
  -4 -16   0    4.92    0.71
  -4 -16   0    6.23    0.98
   4 -16   0    6.97    0.93
   4 -16   0    7.36    1.04
   4  16   0    8.51    1.08
  -4  16   0    7.12    0.98
   6 -16   0    8.92    1.19
  -6 -16   0   10.14    1.23
   6 -16   0    8.50    1.07
   6  16   0   10.18    1.00
  -6  16   0    7.33    1.02
   6  16   0   10.22    1.23
  -8 -16   0    0.26    0.59
   8 -16   0    1.02    0.72
   8 -16   0    0.98    0.72
   8  16   0    0.58    0.59
   8  16   0   -0.18    0.49
  -8  16   0    0.70    0.62
 -10 -16   0    1.37    0.79
  10 -16   0    2.90    0.95
  10  16   0    4.54    0.85
  10  16   0    3.82    0.92
 -10  16   0    3.21    0.79
  12 -16   0    0.40    0.77
 -12 -16   0    2.12    0.90
 -12  16   0    0.77    0.88
  12  16   0    1.01    0.61
 -12  16   0    1.51    0.72
  12  16   0    1.64    0.75
  -1 -17   0    3.27    0.85
  -1 -17   0    2.51    0.61
   1 -17   0    3.72    0.75
  -1  17   0    2.78    0.70
   1  17   0    4.54    0.83
   3 -17   0   14.75    1.41
  -3 -17   0   13.82    1.34
   3 -17   0   12.13    1.19
  -3 -17   0   12.50    0.99
  -3  17   0   10.28    1.18
   3  17   0    9.37    1.14
   5 -17   0    4.75    0.87
  -5 -17   0    6.64    1.02
   5 -17   0    5.46    0.96
  -5  17   0    5.73    0.94
   5  17   0    3.85    0.87
  -7 -17   0    6.02    1.06
   7 -17   0    6.54    1.01
   7 -17   0    7.30    1.16
  -7  17   0    5.79    0.97
   7  17   0    7.52    1.11
   7  17   0    6.83    0.91
   9 -17   0    0.06    0.70
  -9 -17   0    0.09    0.63
   9 -17   0   -0.60    0.59
   9  17   0    0.96    0.56
   9  17   0   -0.25    0.64
  -9  17   0   -0.20    0.56
 -11 -17   0    4.94    1.13
  11 -17   0    4.34    1.04
  11  17   0    4.44    0.84
 -11  17   0    4.67    0.90
  11  17   0    6.04    1.07
   0 -18   0    8.25    0.93
   0 -18   0    7.84    1.12
   0  18   0    5.48    0.98
   2 -18   0    0.71    0.59
  -2 -18   0    1.17    0.52
   2 -18   0    0.00    0.65
  -2 -18   0    0.04    0.58
  -2  18   0    1.26    0.63
   2  18   0    0.43    0.57
  -4 -18   0    1.09    0.70
   4 -18   0    0.90    0.65
   4 -18   0    2.61    0.78
  -4 -18   0    0.66    0.48
  -4  18   0    1.34    0.68
   4  18   0    0.23    0.54
  -6 -18   0   13.01    1.42
   6 -18   0   12.59    1.37
   6 -18   0   14.08    1.41
  -6  18   0   13.37    1.39
   6  18   0   11.33    1.31
   6  18   0   14.15    1.12
  -8 -18   0    1.17    0.72
   8 -18   0   -0.19    0.70
   8 -18   0    1.41    0.74
   8  18   0    0.51    0.57
   8  18   0    0.68    0.67
  -8  18   0    0.26    0.61
  10 -18   0    8.55    1.32
 -10 -18   0    5.04    1.11
  10  18   0    6.71    1.53
 -10  18   0   10.25    1.27
  10  18   0    9.29    1.13
  -1 -19   0    0.90    0.52
  -1 -19   0    0.70    0.68
   1 -19   0   -1.29    0.54
   1 -19   0   -0.23    0.47
   1  19   0    0.20    0.57
  -1  19   0    0.95    0.63
   3 -19   0    5.91    0.99
   3 -19   0    7.64    1.07
  -3 -19   0    7.15    0.88
  -3 -19   0    6.64    1.05
   3  19   0    7.68    1.17
  -3  19   0    4.81    0.91
   5 -19   0   -0.52    0.64
  -5 -19   0    0.66    0.68
   5 -19   0    0.23    0.68
   5  19   0    0.55    0.67
  -5  19   0   -0.39    0.53
   7 -19   0    0.42    0.74
  -7 -19   0   -0.26    0.59
   7 -19   0    0.33    0.68
  -7  19   0    0.31    0.61
  -9 -19   0    1.68    0.88
   9 -19   0    1.58    0.82
   9 -19   0    2.64    0.95
   9  19   0    2.18    0.71
   9  19   0    0.56    0.77
  -9  19   0    1.73    0.75
   0 -20   0    0.73    0.71
   0 -20   0   -0.13    0.51
  -2 -20   0    0.62    0.50
   2 -20   0   -0.28    0.67
  -2 -20   0   -0.02    0.65
   2 -20   0    0.45    0.58
  -2  20   0   -0.42    0.73
   2  20   0    0.10    0.61
   4 -20   0    1.60    0.77
   4 -20   0    0.81    0.69
  -4 -20   0    0.31    0.73
  -4 -20   0    2.66    0.63
   4  20   0    0.58    0.71
   6 -20   0    1.56    0.83
  -6 -20   0    0.63    0.67
   6 -20   0   -0.03    0.70
   6  20   0    2.83    0.76
   6  20   0    1.57    0.77
   8 -20   0    1.08    0.80
   8 -20   0    0.06    0.68
  -8 -20   0    0.41    0.73
   8  20   0    0.53    0.75
  -8  20   0    0.46    0.72
   8  20   0    0.20    0.58
   1 -21   0    1.72    0.66
   1 -21   0    3.04    0.93
  -1 -21   0    2.58    0.85
  -1  21   0    2.95    0.89
   1  21   0    2.27    0.80
   3 -21   0   -0.05    0.55
  -3 -21   0   -0.25    0.63
   3 -21   0   -1.01    0.63
  -3 -21   0   -0.16    0.51
  -3  21   0    0.06    0.65
   3  21   0   -0.07    0.64
   5 -21   0    0.05    0.73
   5 -21   0   -0.97    0.56
  -5 -21   0   -0.12    0.66
  -5  21   0    0.73    0.74
   5  21   0    0.17    0.64
   7 -21   0   -0.73    0.66
  -7 -21   0    0.43    0.72
   7 -21   0   -0.87    0.65
  -7  21   0   -0.28    0.68
   7  21   0   -0.86    0.48
   7  21   0   -0.62    0.65
   0 -22   0    2.86    0.71
   0 -22   0    3.92    1.01
   0  22   0    2.19    0.88
  -2 -22   0    2.20    0.88
   2 -22   0   -1.07    0.63
   2 -22   0    0.93    0.65
  -2 -22   0    0.67    0.58
  -2  22   0    1.15    0.78
   2  22   0    3.05    0.92
  -4 -22   0    0.82    0.54
   4 -22   0    1.71    0.88
   4 -22   0    1.99    0.77
  -4 -22   0    1.04    0.80
  -4  22   0    0.92    0.76
   4  22   0   -0.79    0.64
   6 -22   0    0.96    0.83
  -6 -22   0    0.98    0.77
   6 -22   0    0.89    0.78
   6  22   0    0.59    0.57
   6  22   0    1.26    0.87
  -6  22   0    1.10    0.82
   1 -23   0    1.96    0.93
  -1 -23   0   -0.46    0.51
   1 -23   0   -1.08    0.50
  -1 -23   0   -0.28    0.76
   1  23   0   -0.86    0.56
  -1  23   0   -0.15    0.75
   3 -23   0    0.33    0.61
   3 -23   0   -0.01    0.77
  -3 -23   0    0.28    0.52
  -3 -23   0    0.87    0.85
  -3  23   0   -0.93    0.62
   3  23   0   -0.45    0.64
 -16   0   1   -0.41    0.70
  16   0  -1    0.47    0.68
 -14   0   1    0.82    0.71
  14   0  -1   -0.57    0.53
 -12   0   1    0.08    0.59
  12   0  -1   -0.04    0.49
 -10   0   1    0.23    0.46
  10   0  -1    0.60    0.46
   8   0  -1   -0.48    0.28
  -8   0   1    0.17    0.44
   6   0  -1   -0.19    0.35
   6   0  -1   -0.16    0.34
  -6   0   1   -0.12    0.39
  -6   0   1   -0.29    0.27
  -4   0   1   -0.10    0.21
   4   0  -1    0.35    0.26
   4   0  -1   -0.04    0.21
  -4   0   1   -0.02    0.19
   2   0  -1    0.23    0.20
   2   0  -1   -0.15    0.17
   2   0  -1    0.22    0.17
   2   0  -1    0.01    0.15
  -2   0   1    0.00    0.21
   0   0  -1    0.18    0.11
   0   0   1    0.09    0.11
   0   0  -1    0.07    0.12
   0   0   1    0.04    0.12
   0   0  -1    0.06    0.13
  -2   0  -1    0.29    0.19
  -2   0  -1   -0.13    0.19
   2   0   1   -0.05    0.19
   2   0   1   -0.21    0.19
   2   0   1    0.00    0.19
  -2   0  -1   -0.16    0.18
   4   0   1   -0.23    0.17
  -4   0  -1    0.03    0.17
   4   0   1   -0.13    0.21
  -4   0  -1    0.01    0.22
   4   0   1   -0.08    0.21
  -4   0  -1   -0.32    0.17
  -6   0  -1    0.16    0.31
   6   0   1    0.09    0.35
  -6   0  -1    0.31    0.40
   6   0   1    0.31    0.30
   6   0   1    0.09    0.37
  -6   0  -1   -0.14    0.26
  -8   0  -1   -0.26    0.26
   8   0   1   -0.57    0.31
  -8   0  -1   -0.79    0.32
  -8   0  -1    0.17    0.22
 -10   0  -1    0.23    0.25
 -10   0  -1    0.01    0.22
 -10   0  -1   -0.22    0.43
  10   0   1   -0.48    0.35
  12   0   1   -0.66    0.43
 -12   0  -1   -0.03    0.25
 -12   0  -1   -0.08    0.26
 -12   0  -1   -0.25    0.58
 -14   0  -1    0.37    0.73
  14   0   1    0.50    0.56
  16   0   1    1.22    0.69
 -16   0  -1    0.66    0.81
 -17  -1   1    1.00    0.87
  17  -1  -1    1.70    0.85
 -17   1   1    3.10    1.01
  17   1  -1    0.96    0.72
  15  -1  -1    1.33    0.74
 -15  -1   1    2.16    0.83
 -15   1   1    1.24    0.78
  15   1  -1    1.15    0.74
  13  -1  -1  116.53    4.18
 -13  -1   1  122.63    4.38
  13   1  -1  121.73    4.24
 -13   1   1  117.38    4.30
  11  -1  -1    6.64    0.91
 -11  -1   1    6.32    0.98
  11   1  -1    5.44    0.85
 -11   1   1    6.11    0.95
  -9  -1   1   32.66    1.61
   9  -1  -1   32.14    1.56
   9   1  -1   31.62    1.54
  -9   1   1   31.34    1.60
   7  -1  -1    3.13    0.57
  -7  -1   1    3.63    0.62
   7   1  -1    2.70    0.56
  -7   1   1    2.63    0.61
  -5  -1   1    4.47    0.54
   5  -1  -1    3.93    0.49
  -5  -1   1    3.78    0.49
   5  -1  -1    3.88    0.49
  -5   1   1    5.15    0.56
  -5   1   1    3.35    0.49
   5   1  -1    3.61    0.47
   5   1  -1    3.78    0.49
   3  -1  -1   40.45    1.10
   3  -1  -1   39.93    1.30
   3  -1  -1   39.03    1.33
  -3  -1   1   39.59    1.13
  -3  -1   1   39.44    1.30
   3   1  -1   40.30    1.11
  -3   1   1   39.65    1.35
   3   1  -1   40.19    1.33
   3   1  -1   38.71    1.30
  -3   1   1   38.77    1.11
  -3   1   1   41.27    1.30
   3   1  -1   39.82    1.31
   1  -1  -1   75.56    2.11
  -1  -1   1   78.48    2.13
   1  -1  -1   78.15    2.06
   1  -1  -1   78.69    2.09
  -1  -1   1   77.50    2.04
  -1  -1   1   78.56    2.09
   1   1  -1   78.93    2.13
   1   1  -1   77.48    2.08
  -1   1   1   77.96    2.12
   1   1  -1   78.46    2.04
  -1   1   1   77.08    2.09
  -1  -1  -1    8.35    0.46
  -1  -1  -1    9.52    0.37
  -1  -1  -1    8.62    0.47
   1  -1   1    9.42    0.47
   1   1   1    8.47    0.46
  -1   1  -1    9.37    0.35
  -1   1  -1    9.99    0.47
   1   1   1    9.25    0.48
  -1   1  -1    9.62    0.48
   1   1   1    9.06    0.38
  -3  -1  -1  152.68    3.97
   3  -1   1  154.35    4.05
   3  -1   1  154.23    3.99
  -3  -1  -1  152.75    4.00
  -3  -1  -1  153.59    4.06
  -3   1  -1  152.42    4.00
  -3   1  -1  149.49    3.98
   3   1   1  153.78    3.98
  -3   1  -1  151.22    4.01
  -3   1  -1  151.38    4.03
   3   1   1  153.36    4.03
   3   1   1  151.34    4.05
  -5  -1  -1   37.85    1.25
  -5  -1  -1   37.13    1.33
   5  -1   1   36.41    1.36
   5  -1   1   38.78    1.40
  -5  -1  -1   36.58    1.42
  -5   1  -1   37.47    1.39
  -5   1  -1   35.82    1.36
   5   1   1   37.13    1.41
   5   1   1   36.66    1.34
   5   1   1   37.68    1.29
  -5   1  -1   38.34    1.28
  -5   1  -1   37.67    1.25
   7  -1   1    2.95    0.57
  -7  -1  -1    3.32    0.42
  -7  -1  -1    3.39    0.60
   7  -1   1    3.26    0.57
  -7  -1  -1    3.55    0.55
   7   1   1    3.09    0.45
  -7   1  -1    3.26    0.59
  -7   1  -1    3.79    0.45
  -7   1  -1    2.78    0.41
   7   1   1    3.52    0.60
  -9  -1  -1    1.34    0.51
  -9  -1  -1    1.29    0.31
   9  -1   1    1.73    0.49
  -9   1  -1    1.43    0.50
  -9   1  -1    1.31    0.32
  -9   1  -1    1.12    0.29
   9   1   1    2.10    0.56
  11  -1   1    3.53    0.74
 -11  -1  -1    4.41    0.50
 -11  -1  -1    4.59    0.48
 -11  -1  -1    4.41    0.87
 -11   1  -1    3.93    0.45
  11   1   1    3.31    0.72
 -11   1  -1    4.68    0.46
 -11   1  -1    5.20    0.89
  13  -1   1   -0.86    0.42
 -13  -1  -1    0.04    0.58
  13   1   1    0.32    0.55
 -13   1  -1    1.13    0.72
 -15  -1  -1   55.34    2.81
 -15   1  -1   52.10    2.73
 -17  -1  -1    0.78    0.87
  17  -1   1    0.32    0.71
 -17   1  -1    0.90    0.85
  17   1   1    1.39    0.76
  16  -2  -1    0.15    0.63
 -16  -2   1    0.26    0.67
  16   2  -1   -0.38    0.64
 -16   2   1    0.02    0.75
 -14  -2   1   11.27    1.40
  14  -2  -1    9.81    1.27
  14   2  -1   10.66    1.30
 -14   2   1   11.51    1.43
 -12  -2   1   16.03    1.40
  12  -2  -1   14.20    1.23
 -12   2   1   16.80    1.42
  12   2  -1   11.72    1.28
 -10  -2   1   -0.05    0.63
  10   2  -1    0.27    0.42
 -10   2   1   -0.12    0.71
  -8  -2   1    0.07    0.38
   8  -2  -1   -0.16    0.33
  -8   2   1    0.17    0.44
   8   2  -1   -0.11    0.37
  -6  -2   1    6.92    0.69
   6  -2  -1    6.06    0.66
  -6  -2   1    5.96    0.38
  -6  -2   1    6.48    0.74
   6  -2  -1    5.97    0.68
   6   2  -1    5.56    0.65
  -6   2   1    5.92    0.71
   6   2  -1    6.02    0.70
  -6   2   1    7.51    0.74
   4  -2  -1   14.85    0.48
   4  -2  -1   15.02    0.77
   4  -2  -1   13.80    0.80
  -4  -2   1   13.42    0.73
  -4  -2   1   13.66    0.52
   4   2  -1   15.30    0.75
  -4   2   1   14.08    0.51
  -4   2   1   14.04    0.77
   4   2  -1   14.41    0.84
   4   2  -1   13.93    0.72
  -4   2   1   14.74    0.72
   4   2  -1   14.34    0.52
   2  -2  -1   89.14    2.46
  -2  -2   1   93.43    2.44
  -2  -2   1   90.59    2.56
   2  -2  -1   93.07    2.42
   2  -2  -1   93.25    2.56
  -2  -2   1   92.17    2.48
  -2   2   1   92.30    2.48
  -2   2   1   92.90    2.45
  -2   2   1   91.11    2.57
   2   2  -1   91.85    2.56
   2   2  -1   93.42    2.44
   2   2  -1   91.10    2.47
   0  -2  -1   17.01    0.49
   0  -2   1   17.11    0.66
   0  -2  -1   17.12    0.66
   0  -2  -1   16.79    0.70
   0  -2   1   16.08    0.68
   0   2   1   17.29    0.67
   0   2  -1   17.29    0.66
   0   2  -1   16.19    0.67
   0   2   1   16.21    0.70
   0   2   1   16.93    0.49
   2  -2   1  154.13    4.05
   2  -2   1  154.43    3.89
   2  -2   1  154.27    4.01
  -2  -2  -1  149.85    4.04
  -2  -2  -1  154.41    3.87
  -2  -2  -1  152.50    4.01
   2   2   1  154.82    3.88
  -2   2  -1  153.98    3.89
   2   2   1  153.45    4.05
  -2   2  -1  151.79    4.00
   2   2   1  152.34    4.03
  -2   2  -1  152.79    4.02
  -4  -2  -1   25.54    0.94
   4  -2   1   25.05    0.96
   4  -2   1   25.26    1.04
  -4  -2  -1   26.72    1.08
  -4  -2  -1   26.57    0.95
  -4   2  -1   25.24    1.02
  -4   2  -1   24.15    0.91
   4   2   1   24.23    0.95
   4   2   1   25.11    0.94
  -4   2  -1   25.05    0.98
   4   2   1   25.43    1.05
   6  -2   1    1.97    0.50
  -6  -2  -1    1.84    0.35
   6  -2   1    1.46    0.45
  -6  -2  -1    1.79    0.52
  -6   2  -1    2.01    0.46
   6   2   1    1.67    0.40
   6   2   1    2.29    0.45
  -6   2  -1    1.52    0.37
   6   2   1    2.45    0.55
  -6   2  -1    2.50    0.40
  -6   2  -1    1.72    0.50
   8  -2   1   34.12    1.56
  -8  -2  -1   35.12    1.23
  -8  -2  -1   35.30    1.63
   8   2   1   34.26    1.32
  -8   2  -1   33.92    1.26
  -8   2  -1   33.30    1.21
   8   2   1   35.27    1.50
  -8   2  -1   34.43    1.56
  10  -2   1    3.34    1.01
 -10  -2  -1    2.43    0.38
 -10   2  -1    1.75    0.35
  10   2   1    3.04    0.45
 -10   2  -1    2.38    0.68
 -10   2  -1    2.10    0.36
  10   2   1    2.56    0.61
 -12  -2  -1    6.77    0.56
 -12  -2  -1    7.00    1.07
  12  -2   1    6.78    1.04
 -12   2  -1    8.53    1.15
  12   2   1    5.79    0.91
 -14  -2  -1   42.14    2.37
 -14   2  -1   40.60    2.33
  14   2   1   38.47    2.13
  16  -2   1    1.43    0.78
 -16  -2  -1    0.16    0.72
 -16   2  -1    0.18    0.70
  16   2   1    0.00    0.54
  17  -3  -1    0.48    0.74
 -17  -3   1    0.46    0.80
 -17   3   1    0.19    0.78
  17   3  -1    1.31    0.84
  15  -3  -1    2.45    1.07
 -15  -3   1    4.57    1.24
 -15   3   1    2.57    0.97
  15   3  -1    2.00    0.79
 -13  -3   1    9.82    1.30
  13  -3  -1    6.85    1.09
  13   3  -1    9.36    1.17
 -13   3   1   10.51    1.34
 -11  -3   1   10.75    1.19
  11  -3  -1   10.42    1.17
  11   3  -1   11.01    1.20
 -11   3   1    9.77    1.14
  -9  -3   1    5.07    0.77
   9  -3  -1    3.99    0.66
  -9   3   1    3.81    0.74
   9   3  -1    3.41    0.65
   7  -3  -1  148.05    4.35
  -7  -3   1  143.89    3.84
  -7  -3   1  154.38    4.45
  -7   3   1  150.71    4.45
   7   3  -1  150.26    3.85
   7   3  -1  149.84    4.37
   5  -3  -1   31.32    1.30
   5  -3  -1   31.43    1.26
  -5  -3   1   31.10    1.00
  -5  -3   1   30.86    1.29
   5  -3  -1   30.28    0.92
   5   3  -1   32.35    1.00
   5   3  -1   31.17    1.28
   5   3  -1   30.34    1.39
   5   3  -1   30.00    1.38
  -5   3   1   29.52    1.33
  -5   3   1   31.54    0.96
  -3  -3   1   44.19    1.48
   3  -3  -1   44.25    1.40
   3  -3  -1   44.20    1.50
  -3  -3   1   46.03    1.43
  -3  -3   1   44.66    1.32
   3  -3  -1   45.04    1.28
   3   3  -1   43.59    1.47
   3   3  -1   43.65    1.42
  -3   3   1   43.58    1.40
  -3   3   1   45.03    1.51
   3   3  -1   43.97    1.31
  -3   3   1   44.88    1.31
   1  -3  -1   38.87    1.19
  -1  -3   1   39.47    1.21
  -1  -3   1   38.64    1.26
   1  -3  -1   37.00    1.26
  -1  -3   1   39.43    1.11
   1  -3  -1   39.33    1.09
   1   3  -1   39.15    1.20
  -1   3   1   38.42    1.21
  -1   3   1   39.19    1.10
   1   3  -1   36.47    1.25
   1   3  -1   38.94    1.10
  -1  -3  -1  198.98    5.11
   1  -3   1  200.82    5.15
  -1  -3  -1  194.27    5.16
   1  -3   1  202.18    5.11
  -1   3  -1  201.23    5.13
   1   3   1  196.23    5.15
  -1   3  -1  198.75    5.10
   1   3   1  195.37    5.13
  -3  -3  -1   31.21    0.98
   3  -3   1   31.27    1.02
  -3  -3  -1   29.96    1.07
   3  -3   1   31.40    1.08
   3  -3   1   31.36    1.16
  -3  -3  -1   29.79    1.16
   3   3   1   31.82    1.12
  -3   3  -1   30.88    1.03
  -3   3  -1   30.17    1.06
   3   3   1   32.21    1.19
   3   3   1   31.38    0.99
  -3   3  -1   31.76    1.14
   5  -3   1    3.88    0.45
  -5  -3  -1    4.05    0.57
  -5  -3  -1    4.46    0.47
   5  -3   1    4.24    0.56
   5  -3   1    4.31    0.50
  -5  -3  -1    4.24    0.44
   5   3   1    4.33    0.49
  -5   3  -1    3.80    0.43
  -5   3  -1    5.00    0.57
   5   3   1    4.27    0.55
  -5   3  -1    4.49    0.54
   5   3   1    3.44    0.51
  -7  -3  -1    0.75    0.29
   7  -3   1    0.78    0.45
   7  -3   1    0.85    0.42
  -7  -3  -1    0.53    0.32
  -7  -3  -1    0.22    0.45
   7   3   1    0.89    0.40
  -7   3  -1    1.09    0.35
   7   3   1    0.94    0.43
  -7   3  -1    0.81    0.45
  -7   3  -1    0.23    0.29
  -9  -3  -1   22.37    0.95
  -9  -3  -1   20.71    1.34
   9  -3   1   22.19    1.29
  -9   3  -1   22.56    1.00
  -9   3  -1   22.75    0.95
   9   3   1   23.38    1.06
  -9   3  -1   22.11    1.30
   9   3   1   22.89    1.24
  11  -3   1    3.32    0.74
 -11  -3  -1    4.93    0.50
 -11  -3  -1    5.14    0.90
 -11   3  -1    4.87    0.51
  11   3   1    3.83    0.76
 -11   3  -1    3.65    0.83
 -11   3  -1    4.98    0.52
  11   3   1    5.42    0.61
 -13  -3  -1    2.41    0.88
 -13  -3  -1    0.93    0.33
 -13  -3  -1    1.05    0.39
  13  -3   1    1.39    0.66
 -13   3  -1    1.72    0.78
  13   3   1    1.81    0.72
  15  -3   1    0.99    0.91
 -15  -3  -1    0.68    0.88
  15   3   1    1.30    0.72
 -15   3  -1    1.03    0.81
  17  -3   1    0.82    0.69
 -17  -3  -1    0.89    0.81
  17   3   1    0.58    0.64
 -17   3  -1    2.94    1.00
 -16  -4   1   -0.46    0.63
  16  -4  -1   -0.27    0.64
  16   4  -1    0.64    0.68
 -16   4   1    2.20    0.92
  14  -4  -1    0.94    0.63
 -14  -4   1    1.01    0.70
 -14   4   1   -0.03    0.60
  14   4  -1    1.17    0.65
 -12  -4   1   24.15    1.70
  12  -4  -1   24.57    1.61
 -12   4   1   26.49    1.79
  12   4  -1   23.22    1.56
  10  -4  -1    1.05    0.47
 -10  -4   1    1.53    0.61
  10   4  -1    1.16    0.59
 -10   4   1    2.18    0.66
  -8  -4   1    0.20    0.19
  -8  -4   1    0.93    0.45
   8  -4  -1    0.15    0.36
   8   4  -1    0.24    0.19
  -8   4   1    0.06    0.39
   8   4  -1   -0.11    0.30
   6  -4  -1   11.30    0.90
  -6  -4   1   10.97    0.62
   6  -4  -1   11.48    0.85
  -6  -4   1   12.44    0.93
   6  -4  -1   11.36    0.54
   6   4  -1   12.55    0.86
   6   4  -1   12.68    0.90
   6   4  -1   12.24    0.88
  -6   4   1   11.21    0.58
  -6   4   1   12.09    0.83
  -6   4   1   11.24    0.98
   6   4  -1   12.14    0.62
   4  -4  -1  252.48    6.46
  -4  -4   1  250.78    6.51
   4  -4  -1  257.74    6.69
  -4  -4   1  277.67    6.94
   4  -4  -1  248.96    6.77
   4   4  -1  253.59    6.74
  -4   4   1  257.38    6.50
   4   4  -1  258.77    6.52
  -4   4   1  258.99    6.69
   4   4  -1  255.32    6.71
  -4   4   1  258.44    6.80
  -2  -4   1    9.26    0.49
   2  -4  -1    8.29    0.57
   2  -4  -1    8.51    0.44
   2  -4  -1    9.31    0.47
  -2  -4   1    9.00    0.56
  -2  -4   1    8.73    0.49
  -2   4   1    8.77    0.46
   2   4  -1    8.44    0.48
   2   4  -1    8.96    0.49
   2   4  -1    8.88    0.56
  -2   4   1    9.22    0.60
  -2   4   1    9.13    0.50
   0  -4  -1   99.73    2.72
   0  -4   1  100.78    2.73
   0  -4  -1  100.88    2.81
   0  -4   1   99.50    2.78
   0  -4   1  100.53    2.53
   0   4  -1   97.40    2.53
   0   4  -1   96.09    2.75
   0   4   1   99.57    2.75
   0   4   1   97.60    2.79
   0   4  -1   98.92    2.71
  -2  -4  -1   89.41    2.57
   2  -4   1   92.43    2.43
  -2  -4  -1   92.20    2.68
   2  -4   1   92.07    2.65
   2  -4   1   92.10    2.58
   2   4   1   92.75    2.62
   2   4   1   93.21    2.36
  -2   4  -1   91.43    2.62
  -2   4  -1   93.21    2.43
  -2   4  -1   90.25    2.57
   2   4   1   92.57    2.67
   4  -4   1    1.07    0.30
   4  -4   1    1.33    0.29
  -4  -4  -1    0.98    0.34
  -4  -4  -1    1.66    0.30
   4  -4   1    1.43    0.36
  -4  -4  -1    1.58    0.28
  -4   4  -1    1.38    0.31
   4   4   1    2.08    0.32
   4   4   1    1.42    0.36
  -4   4  -1    0.85    0.29
  -6  -4  -1   64.20    2.34
   6  -4   1   68.56    2.10
   6  -4   1   63.34    2.18
  -6  -4  -1   66.59    2.07
   6  -4   1   66.44    2.31
  -6  -4  -1   65.82    2.13
  -6   4  -1   68.83    2.24
  -6   4  -1   68.59    2.10
   6   4   1   67.97    2.15
   6   4   1   64.46    2.15
   6   4   1   74.29    2.87
  -8  -4  -1   20.66    0.95
  -8  -4  -1   23.62    1.33
   8  -4   1   21.06    1.22
  -8   4  -1   25.86    1.31
  -8   4  -1   21.14    1.00
   8   4   1   23.16    1.07
  -8   4  -1   22.52    1.01
   8   4   1   21.09    1.12
 -10  -4  -1   -0.26    0.32
  10  -4   1    0.56    0.46
 -10  -4  -1    0.11    0.44
 -10   4  -1   -0.42    0.44
 -10   4  -1    0.29    0.30
 -10   4  -1   -0.32    0.27
  10   4   1    0.61    0.44
  10   4   1    0.36    0.34
 -12  -4  -1    4.70    0.55
  12  -4   1    4.16    0.85
 -12  -4  -1    6.43    1.07
  12   4   1    4.68    0.62
 -12   4  -1    4.72    0.92
  12   4   1    4.02    0.83
 -12   4  -1    4.58    0.53
 -14  -4  -1    4.97    1.06
 -14  -4  -1    2.23    0.62
  14  -4   1    3.66    0.92
 -14   4  -1    3.57    0.96
  14   4   1    4.63    0.97
  16  -4   1   -0.32    0.59
 -16  -4  -1    0.92    0.81
  16   4   1   -0.06    0.76
 -16   4  -1    1.04    0.80
  17  -5  -1    2.29    0.92
 -17  -5   1    4.02    1.08
 -17   5   1    3.72    1.11
  17   5  -1    3.67    1.03
  15  -5  -1   -0.12    0.62
 -15  -5   1    0.64    0.74
  15   5  -1    0.08    0.62
 -13  -5   1    0.74    0.65
  13  -5  -1   -0.64    0.51
  13   5  -1    0.60    0.61
 -13   5   1   -0.01    0.66
  11  -5  -1   12.13    1.25
 -11  -5   1   11.26    1.22
 -11   5   1   13.42    1.42
  11   5  -1   13.86    1.17
  -9  -5   1    0.44    0.23
   9  -5  -1    0.72    0.43
  -9  -5   1    0.98    0.51
   9   5  -1    0.44    0.40
   9   5  -1    0.41    0.26
  -9   5   1    1.31    0.52
  -7  -5   1   30.90    1.44
   7  -5  -1   26.41    0.95
  -7  -5   1   26.55    1.03
   7  -5  -1   27.38    1.32
   7   5  -1   27.42    1.04
  -7   5   1   28.65    1.45
   7   5  -1   29.67    1.39
  -7   5   1   28.66    1.00
  -5  -5   1    0.52    0.40
  -5  -5   1    1.78    0.36
   5  -5  -1    0.61    0.45
   5  -5  -1    1.44    0.30
   5  -5  -1    1.63    0.42
   5   5  -1    0.72    0.38
   5   5  -1    1.34    0.35
  -5   5   1    1.21    0.47
   5   5  -1    1.36    0.45
  -5   5   1    1.17    0.42
   5   5  -1    0.94    0.42
  -5   5   1    1.76    0.33
   3  -5  -1   77.40    2.26
   3  -5  -1   76.77    2.20
  -3  -5   1   75.21    2.36
  -3  -5   1   77.87    2.31
   3  -5  -1   78.70    2.40
  -3  -5   1   80.07    2.25
  -3   5   1   80.69    2.27
  -3   5   1   77.99    2.41
   3   5  -1   77.92    2.38
   3   5  -1   76.36    2.29
   3   5  -1   80.04    2.25
  -3   5   1   79.48    2.26
  -1  -5   1   42.07    1.34
   1  -5  -1   38.70    1.41
  -1  -5   1   38.61    1.36
   1  -5  -1   42.08    1.17
   1  -5  -1   38.00    1.39
  -1  -5   1   39.91    1.21
   1  -5  -1   41.52    1.31
   1   5  -1   39.36    1.22
   1   5  -1   40.62    1.38
   1   5  -1   41.71    1.33
  -1   5   1   39.96    1.17
  -1   5   1   40.07    1.34
   1  -5   1   33.67    1.00
  -1  -5  -1   33.94    1.27
   1  -5   1   33.54    1.01
   1  -5   1   34.17    1.19
   1  -5   1   34.81    1.24
  -1  -5  -1   32.67    1.16
  -1   5  -1   34.07    1.19
   1   5   1   32.56    1.33
   1   5   1   33.42    1.26
  -1   5  -1   34.01    1.22
  -3  -5  -1    2.13    0.41
   3  -5   1    1.84    0.30
   3  -5   1    2.05    0.34
   3  -5   1    2.15    0.40
  -3  -5  -1    1.98    0.34
   3   5   1    1.68    0.33
  -3   5  -1    1.87    0.30
  -3   5  -1    1.70    0.36
   3   5   1    1.44    0.37
   3   5   1    2.03    0.26
   3   5   1    2.15    0.25
  -3   5  -1    2.00    0.38
   5  -5   1   81.03    2.58
  -5  -5  -1   78.39    2.36
  -5  -5  -1   77.15    2.31
   5  -5   1   79.25    2.40
  -5  -5  -1   77.52    2.60
   5  -5   1   80.27    2.39
   5   5   1   76.06    2.58
  -5   5  -1   82.85    2.46
  -5   5  -1   74.42    2.49
   5   5   1   76.79    2.43
  -5   5  -1   77.90    2.34
   5   5   1   77.97    2.32
  -7  -5  -1    0.02    0.25
   7  -5   1    0.17    0.27
  -7  -5  -1    0.08    0.26
   7  -5   1    0.22    0.33
  -7  -5  -1    0.39    0.42
   7  -5   1    0.50    0.43
  -7   5  -1   -0.18    0.37
   7   5   1   -0.22    0.28
   7   5   1   -0.24    0.28
  -7   5  -1   -0.06    0.29
  -9  -5  -1   13.18    1.24
   9  -5   1   15.11    1.12
  -9  -5  -1   11.72    0.73
   9   5   1   12.58    0.84
  -9   5  -1   11.12    1.05
  -9   5  -1   12.15    0.79
  -9   5  -1   11.90    0.73
   9   5   1   10.85    0.91
 -11  -5  -1    0.38    0.55
  11  -5   1    0.17    0.53
 -11  -5  -1    0.17    0.31
 -11   5  -1    0.62    0.37
 -11   5  -1    0.50    0.58
  11   5   1   -0.04    0.36
 -11   5  -1    0.49    0.35
 -13  -5  -1   18.64    1.62
  13  -5   1   19.04    1.49
 -13  -5  -1   14.06    0.87
 -13   5  -1   18.87    1.56
  13   5   1   19.73    1.07
  13   5   1   19.66    1.44
 -13   5  -1   16.61    0.89
 -13   5  -1   18.63    1.03
 -15  -5  -1    5.77    1.18
  15  -5   1    4.28    1.00
 -15   5  -1    7.01    1.27
  15   5   1    5.14    0.98
  17  -5   1    0.85    0.76
 -17  -5  -1    1.84    0.92
 -17   5  -1    1.39    0.88
  17   5   1    1.15    0.73
  16  -6  -1    0.62    0.71
 -16  -6   1    1.92    0.89
 -16   6   1    0.79    0.83
  16   6  -1    1.36    0.78
 -14  -6   1    3.78    0.94
  14  -6  -1    3.32    0.93
  14   6  -1    2.43    0.77
 -14   6   1    3.33    0.96
 -12  -6   1    6.61    1.09
  12  -6  -1    7.89    1.10
 -12  -6   1    6.84    0.54
 -12   6   1    6.93    1.14
  12   6  -1    5.57    0.98
  12   6  -1    7.99    0.98
 -10  -6   1    1.19    0.32
 -10  -6   1    1.87    0.66
  10  -6  -1    1.31    0.60
  10   6  -1    1.73    0.37
  10   6  -1    1.24    0.89
 -10   6   1    2.39    0.66
   8  -6  -1   -0.08    0.19
  -8  -6   1    0.25    0.26
  -8  -6   1   -0.30    0.34
   8  -6  -1    0.25    0.34
   8   6  -1   -0.11    0.23
  -8   6   1   -0.28    0.19
   8   6  -1   -0.29    0.32
  -8   6   1    0.08    0.44
  -6  -6   1   17.68    1.09
   6  -6  -1   18.31    0.81
   6  -6  -1   18.59    1.05
  -6  -6   1   18.16    0.87
  -6   6   1   18.57    1.17
   6   6  -1   20.18    1.13
  -6   6   1   18.87    1.04
   6   6  -1   19.16    1.05
   6   6  -1   18.82    0.88
  -6   6   1   18.19    0.84
   6   6  -1   20.58    1.11
   4  -6  -1   29.34    1.33
  -4  -6   1   30.72    1.29
  -4  -6   1   30.69    1.29
   4  -6  -1   30.32    1.10
   4  -6  -1   31.13    1.22
  -4  -6   1   31.79    1.18
   4   6  -1   27.43    1.38
  -4   6   1   28.25    1.36
   4   6  -1   30.18    1.16
  -4   6   1   31.14    1.21
   4   6  -1   28.80    1.27
   2  -6  -1    1.80    0.41
   2  -6  -1    2.78    0.44
  -2  -6   1    2.50    0.35
   2  -6  -1    3.59    0.40
  -2  -6   1    3.20    0.41
  -2  -6   1    3.08    0.44
   2  -6  -1    3.14    0.34
   2   6  -1    2.80    0.37
  -2   6   1    3.15    0.40
  -2   6   1    3.91    0.38
   2   6  -1    2.74    0.40
   2   6  -1    2.50    0.38
   0  -6   1    0.29    0.22
   0  -6   1    0.05    0.19
   0  -6  -1    0.44    0.31
   0  -6  -1    0.39    0.15
   0  -6  -1    0.31    0.21
   0   6  -1    0.45    0.24
   0   6   1    0.59    0.15
   0   6  -1    0.40    0.25
   0   6   1    0.43    0.25
   0   6   1    0.07    0.26
   0   6  -1    0.20    0.19
  -2  -6  -1    9.02    0.71
   2  -6   1    7.98    0.58
   2  -6   1    8.28    0.48
  -2  -6  -1    8.17    0.57
   2  -6   1    8.71    0.65
  -2   6  -1    7.06    0.59
  -2   6  -1    7.56    0.58
   2   6   1    8.62    0.38
   2   6   1    8.12    0.39
   2   6   1    8.64    0.70
   2   6   1    8.80    0.63
   4  -6   1    2.64    0.54
  -4  -6  -1    3.07    0.59
  -4  -6  -1    2.86    0.44
   4  -6   1    2.43    0.44
   4  -6   1    3.74    0.48
  -4   6  -1    2.53    0.45
   4   6   1    3.96    0.42
  -4   6  -1    2.71    0.50
  -4   6  -1    3.49    0.51
   4   6   1    4.04    0.55
   4   6   1    2.86    0.58
   4   6   1    3.18    0.39
   6  -6   1   19.62    1.02
   6  -6   1   20.45    1.16
  -6  -6  -1   19.72    1.20
  -6  -6  -1   18.15    0.90
  -6  -6  -1   18.19    0.92
  -6   6  -1   18.36    0.93
   6   6   1   18.50    0.93
   6   6   1   18.23    1.00
  -6   6  -1   18.61    1.04
   8  -6   1   35.62    1.39
  -8  -6  -1   36.93    1.37
  -8  -6  -1   36.44    1.73
   8  -6   1   32.02    1.63
  -8   6  -1   35.26    1.33
   8   6   1   35.36    1.47
   8   6   1   33.09    1.48
  -8   6  -1   35.15    1.61
 -10  -6  -1    0.36    0.53
  10  -6   1    1.04    0.55
 -10  -6  -1   -0.10    0.30
  10   6   1   -0.53    0.35
 -10   6  -1    0.69    0.57
 -10   6  -1    0.53    0.38
 -10   6  -1    0.20    0.35
  10   6   1    0.61    0.49
  12  -6   1   -0.04    0.49
 -12  -6  -1   -0.15    0.36
 -12  -6  -1   -0.01    0.60
 -12   6  -1    0.29    0.35
 -12   6  -1   -0.18    0.33
 -12   6  -1   -0.10    0.59
  12   6   1    0.39    0.41
  12   6   1    0.34    0.53
 -14  -6  -1   -0.09    0.61
  14  -6   1    1.18    0.66
 -14  -6  -1   -0.65    0.30
  14   6   1    0.55    0.41
 -14   6  -1   -0.31    0.65
  14   6   1    0.70    0.61
  16  -6   1    1.05    0.80
 -16  -6  -1    0.83    0.78
 -16   6  -1    1.20    0.88
 -17  -7   1    3.93    1.14
  17  -7  -1    2.74    0.96
  17   7  -1    4.24    1.06
 -17   7   1    3.56    1.19
 -15  -7   1    2.05    0.86
  15  -7  -1    1.82    0.80
 -15   7   1    4.03    1.00
  15   7  -1    2.19    0.80
 -13  -7   1    2.30    0.82
  13  -7  -1    0.98    0.68
 -13  -7   1    0.89    0.31
 -13   7   1    0.67    0.69
  13   7  -1    1.45    0.71
  11  -7  -1    4.00    0.82
 -11  -7   1    3.83    0.85
 -11  -7   1    3.73    0.51
 -11   7   1    3.11    0.87
  11   7  -1    2.88    0.49
 -11   7   1    2.67    0.39
  11   7  -1    3.08    0.75
  -9  -7   1    1.76    0.60
   9  -7  -1    1.75    0.59
  -9  -7   1    0.81    0.31
   9  -7  -1    0.82    0.30
   9   7  -1    1.47    0.54
   9   7  -1    1.23    0.36
  -9   7   1    0.36    0.59
  -7  -7   1   -0.58    0.31
   7  -7  -1   -0.05    0.22
   7  -7  -1    0.41    0.34
  -7  -7   1   -0.25    0.25
  -7   7   1    0.13    0.24
   7   7  -1    0.53    0.31
   7   7  -1    0.06    0.34
  -7   7   1    0.16    0.42
  -5  -7   1    6.32    0.74
   5  -7  -1    6.79    0.58
   5  -7  -1    7.50    0.73
  -5  -7   1    8.66    0.71
  -5  -7   1    7.62    0.78
  -5   7   1    7.77    0.68
   5   7  -1    7.46    0.76
   5   7  -1    6.87    0.75
  -5   7   1    6.90    0.80
  -5   7   1    8.21    0.64
   5   7  -1    8.29    0.69
   3  -7  -1   73.38    2.26
   3  -7  -1   76.43    2.39
  -3  -7   1   72.74    2.30
  -3  -7   1   72.88    2.32
   3  -7  -1   75.62    2.45
  -3  -7   1   77.68    2.39
  -3   7   1   75.00    2.24
   3   7  -1   72.49    2.32
   3   7  -1   76.72    2.32
  -3   7   1   73.71    2.47
   3   7  -1   78.14    2.56
  -3   7   1   74.97    2.32
   1  -7  -1   12.00    0.59
   1  -7  -1   11.98    0.93
  -1  -7   1   11.97    0.72
   1  -7  -1   13.02    0.86
   1  -7  -1   14.20    0.91
  -1  -7   1   12.91    0.77
  -1  -7   1   12.10    0.65
  -1   7   1   11.63    0.73
   1   7  -1   11.09    0.74
   1   7  -1   11.39    0.67
  -1   7   1   11.73    0.55
   1   7  -1   12.53    0.76
  -1  -7  -1   20.19    0.91
   1  -7   1   18.95    0.92
   1  -7   1   20.27    0.83
   1  -7   1   21.28    1.01
  -1  -7  -1   19.12    1.04
  -1  -7  -1   20.20    0.68
   1  -7   1   20.62    0.80
   1   7   1   19.72    0.98
   1   7   1   19.68    0.67
  -1   7  -1   19.40    0.95
  -1   7  -1   18.78    0.94
   3  -7   1    1.05    0.35
  -3  -7  -1    0.92    0.36
   3  -7   1    1.27    0.40
  -3  -7  -1    1.23    0.47
   3  -7   1    0.81    0.49
   3   7   1    1.29    0.41
  -3   7  -1    1.36    0.38
   3   7   1    1.03    0.49
  -3   7  -1    0.69    0.38
  -3   7  -1    1.14    0.39
   3   7   1    1.20    0.28
   3   7   1    1.52    0.29
   5  -7   1   88.37    2.85
  -5  -7  -1   84.66    2.61
   5  -7   1   83.51    2.58
  -5  -7  -1   84.87    2.85
   5  -7   1   85.43    2.63
   5   7   1   86.53    2.71
   5   7   1   87.10    2.51
  -5   7  -1   83.74    2.62
   5   7   1   82.11    2.49
  -5   7  -1   86.66    2.60
   7  -7   1    2.83    0.45
  -7  -7  -1    2.43    0.42
   7  -7   1    3.31    0.54
   7  -7   1    2.76    0.58
  -7  -7  -1    3.65    0.67
   7   7   1    2.23    0.45
   7   7   1    2.20    0.43
  -7   7  -1    2.66    0.45
  -7   7  -1    2.89    0.56
   7   7   1    2.14    0.46
   9  -7   1    0.18    0.46
   9  -7   1    0.01    0.30
  -9  -7  -1    0.57    0.51
   9   7   1    0.00    0.38
  -9   7  -1    0.22    0.35
   9   7   1    0.09    0.36
  -9   7  -1    0.62    0.52
 -11  -7  -1    0.49    0.56
  11  -7   1    1.28    0.66
 -11   7  -1    0.20    0.38
 -11   7  -1    1.31    0.64
 -11   7  -1    0.98    0.45
  11   7   1    0.04    0.42
 -13  -7  -1    4.33    0.94
  13  -7   1    4.02    0.91
 -13   7  -1    4.78    0.97
  13   7   1    4.12    0.84
  13   7   1    4.61    0.73
 -13   7  -1    3.53    0.58
 -13   7  -1    4.48    0.56
 -15  -7  -1   -0.68    0.63
  15  -7   1    0.03    0.63
 -15   7  -1    0.93    0.85
  15   7   1    0.04    0.40
  15   7   1   -0.74    0.47
 -16  -8   1   -1.14    0.61
  16  -8  -1    0.23    0.67
  16   8  -1    1.52    0.87
 -16   8   1    1.63    0.93
 -14  -8   1    2.59    0.87
  14  -8  -1    0.63    0.60
  14   8  -1    1.37    0.43
  14   8  -1    0.72    0.67
 -14   8   1    2.31    0.93
 -12  -8   1    7.00    1.12
  12  -8  -1    4.89    0.95
 -12  -8   1    6.45    0.64
 -12   8   1    6.64    1.09
  12   8  -1    5.65    0.69
  12   8  -1    5.80    0.99
  10  -8  -1    0.87    0.54
 -10  -8   1    0.44    0.53
  10  -8  -1    0.77    0.30
 -10  -8   1    0.82    0.36
 -10   8   1    0.66    0.60
 -10   8   1    0.53    0.33
  10   8  -1    0.81    0.41
  10   8  -1    0.90    0.52
   8  -8  -1   13.00    0.84
   8  -8  -1   11.81    0.99
  -8  -8   1   13.06    0.81
  -8  -8   1   13.09    1.09
  -8   8   1   15.54    1.20
   8   8  -1   13.95    0.85
   8   8  -1   13.50    1.03
  -8   8   1   14.64    0.81
   6  -8  -1   13.42    0.90
  -6  -8   1   11.77    0.76
  -6  -8   1   12.48    0.95
   6  -8  -1   11.62    0.70
  -6   8   1   12.08    1.00
   6   8  -1   10.23    0.87
   6   8  -1   13.33    0.81
  -6   8   1   11.39    0.74
  -4  -8   1   32.95    1.43
  -4  -8   1   34.08    1.37
   4  -8  -1   35.68    1.37
   4  -8  -1   32.36    1.29
   4  -8  -1   34.25    1.51
  -4  -8   1   36.36    1.49
   4   8  -1   36.56    1.41
  -4   8   1   35.17    1.38
   4   8  -1   34.73    1.44
  -4   8   1   33.33    1.50
   4   8  -1   34.39    1.46
  -4   8   1   35.69    1.57
   2  -8  -1    2.48    0.42
   2  -8  -1    2.46    0.54
  -2  -8   1    2.38    0.49
   2  -8  -1    2.35    0.41
  -2  -8   1    1.81    0.42
   2  -8  -1    2.47    0.58
  -2   8   1    2.44    0.39
  -2   8   1    2.41    0.47
   2   8  -1    2.25    0.47
   2   8  -1    1.76    0.44
   0  -8  -1    7.61    0.65
   0  -8   1    7.63    0.75
   0  -8   1    7.11    0.69
   0  -8  -1    7.65    0.50
   0  -8   1    7.24    0.61
   0  -8  -1    7.21    0.80
   0   8  -1    7.47    0.65
   0   8  -1    8.98    0.78
   0   8   1    7.22    0.46
   0   8  -1    8.91    0.77
   0   8   1    8.99    0.75
   0   8   1    7.49    0.77
  -2  -8  -1   58.32    2.13
   2  -8   1   56.39    1.79
   2  -8   1   58.69    1.97
  -2  -8  -1   55.58    1.92
   2  -8   1   57.02    1.82
   2  -8   1   56.43    2.02
  -2  -8  -1   58.44    1.65
   2   8   1   55.45    2.05
   2   8   1   60.44    2.05
  -2   8  -1   55.52    1.97
  -2   8  -1   57.39    1.97
   2   8   1   58.35    1.65
   4  -8   1   41.30    1.71
   4  -8   1   43.39    1.51
  -4  -8  -1   40.62    1.77
   4  -8   1   41.33    1.58
  -4  -8  -1   39.36    1.55
   4   8   1   45.63    1.71
  -4   8  -1   41.77    1.60
   4   8   1   43.16    1.39
   4   8   1   43.01    1.41
  -4   8  -1   41.58    1.53
   6  -8   1    1.12    0.37
   6  -8   1    1.33    0.49
   6  -8   1    0.70    0.32
  -6  -8  -1    1.67    0.52
   6   8   1    0.84    0.31
   6   8   1    1.18    0.41
   6   8   1    1.11    0.34
  -6   8  -1    0.69    0.41
  -6   8  -1    0.36    0.34
   8  -8   1    2.04    0.44
   8  -8   1    2.35    0.81
  -8   8  -1    2.03    0.47
  -8   8  -1    2.07    0.57
   8   8   1    2.00    0.46
   8   8   1    2.34    0.52
  10  -8   1    6.09    0.98
 -10  -8  -1    6.16    1.01
 -10   8  -1    5.42    0.67
  10   8   1    5.27    0.78
  10   8   1    6.33    0.80
 -10   8  -1    6.85    0.97
 -12  -8  -1   -0.61    0.54
  12  -8   1    0.46    0.62
  12   8   1    1.02    0.50
 -12   8  -1    0.13    0.67
  12   8   1    0.12    0.50
 -12   8  -1    0.36    0.38
  14  -8   1    7.78    1.41
 -14  -8  -1   10.02    1.59
 -14   8  -1    7.81    0.80
  14   8   1   10.03    1.06
 -14   8  -1   10.22    1.37
  14   8   1    8.47    1.16
 -14   8  -1    9.08    0.75
 -16  -8  -1    0.54    0.78
  16  -8   1    0.23    0.73
  16   8   1   -0.08    0.40
 -16   8  -1    0.04    0.78
 -15  -9   1    0.68    0.71
  15  -9  -1    0.54    0.69
 -15   9   1    0.46    0.86
  15   9  -1    0.27    0.38
  13  -9  -1   13.40    1.46
 -13  -9   1   12.53    1.50
  13   9  -1   16.05    1.56
 -13   9   1    9.76    1.40
  13   9  -1   11.99    0.93
  11  -9  -1    4.06    0.53
  11  -9  -1    5.50    0.93
 -11  -9   1    2.62    0.76
 -11   9   1    4.76    0.94
  11   9  -1    3.97    0.65
  11   9  -1    5.41    0.96
 -11   9   1    4.20    0.57
  -9  -9   1   11.82    1.20
   9  -9  -1   16.10    1.22
   9  -9  -1   12.70    0.79
  -9   9   1   13.15    0.87
  -9   9   1   15.24    1.32
   9   9  -1   13.39    1.14
   9   9  -1   13.55    0.95
   7  -9  -1   -0.79    0.31
  -7  -9   1   -0.47    0.33
   7  -9  -1   -0.10    0.23
  -7   9   1    0.33    0.31
   7   9  -1    0.12    0.32
   7   9  -1    0.00    0.32
  -7   9   1    0.11    0.47
  -5  -9   1    5.45    0.68
  -5  -9   1    4.35    0.63
   5  -9  -1    3.81    0.50
   5  -9  -1    4.54    0.60
  -5   9   1    4.70    0.56
  -5   9   1    4.61    0.70
   5   9  -1    3.94    0.56
  -5   9   1    5.39    0.64
   3  -9  -1   -0.02    0.41
   3  -9  -1    0.30    0.29
  -3  -9   1   -0.01    0.34
   3  -9  -1   -0.17    0.32
   3  -9  -1    0.24    0.46
  -3  -9   1    0.04    0.33
  -3   9   1   -0.14    0.33
   3   9  -1    0.09    0.34
  -3   9   1    0.07    0.29
   3   9  -1   -0.07    0.38
   3   9  -1   -0.32    0.32
   1  -9  -1   20.78    1.21
  -1  -9   1   17.82    1.02
   1  -9  -1   19.81    1.08
   1  -9  -1   18.76    1.10
   1  -9  -1   17.96    0.84
  -1   9   1   20.55    1.08
  -1   9   1   19.72    0.81
   1   9  -1   18.06    0.97
   1   9  -1   20.20    1.04
   1   9  -1   19.34    1.05
   1  -9   1    2.02    0.51
   1  -9   1    1.83    0.47
  -1  -9  -1    2.50    0.33
  -1  -9  -1    1.81    0.56
   1  -9   1    2.67    0.44
   1   9   1    1.71    0.54
  -1   9  -1    2.56    0.52
   1   9   1    2.68    0.33
  -1   9  -1    1.90    0.47
   1   9   1    2.05    0.48
   3  -9   1   -0.14    0.35
  -3  -9  -1   -0.93    0.36
   3  -9   1    0.32    0.40
   3  -9   1    0.35    0.32
  -3   9  -1    0.22    0.36
  -3   9  -1    0.10    0.38
   3   9   1    0.27    0.26
   3   9   1    0.05    0.35
   3   9   1    0.16    0.23
  -5  -9  -1    8.09    0.89
   5  -9   1    8.08    0.73
   5  -9   1    8.95    0.91
   5   9   1    7.79    0.59
   5   9   1    8.02    0.81
  -5   9  -1    7.90    0.76
  -5   9  -1    7.85    0.73
   7  -9   1    4.22    0.74
  -7  -9  -1    5.31    0.83
   7   9   1    4.81    0.70
  -7   9  -1    4.77    0.70
  -7   9  -1    4.88    0.62
   7   9   1    5.17    0.62
   7   9   1    5.09    0.60
  -9  -9  -1    1.96    0.67
   9  -9   1    1.39    0.65
  -9   9  -1    1.89    0.50
  -9   9  -1    2.14    0.66
   9   9   1    2.98    0.59
   9   9   1    1.72    0.52
 -11  -9  -1   -0.79    0.52
  11  -9   1   -0.15    0.56
  11   9   1    0.77    0.54
 -11   9  -1    0.54    0.66
 -11   9  -1   -0.11    0.39
  13  -9   1    1.75    0.81
 -13  -9  -1    1.71    0.81
 -13   9  -1    1.06    0.47
 -13   9  -1    2.34    0.88
  13   9   1    2.82    0.74
  13   9   1    0.71    0.54
  15  -9   1    0.88    0.78
 -15  -9  -1    3.07    0.96
 -15   9  -1    3.55    1.02
  15   9   1    2.64    0.69
  15   9   1    1.91    0.69
 -15   9  -1    1.77    0.49
 -16 -10   1    1.18    0.78
  16 -10  -1   -0.48    0.59
 -16  10   1    0.69    0.88
  16  10  -1    0.35    0.71
  14 -10  -1    1.34    0.76
 -14 -10   1    0.07    0.67
  14  10  -1    2.38    0.83
  14  10  -1    0.17    0.44
 -12 -10   1    7.37    1.14
  12 -10  -1    5.44    0.60
  12 -10  -1    6.25    1.05
 -12  10   1    6.44    1.19
  12  10  -1    5.83    1.03
 -12  10   1    4.73    0.62
  12  10  -1    6.67    0.82
 -10 -10   1    0.53    0.56
  10 -10  -1    0.46    0.59
  10 -10  -1   -0.10    0.30
  10  10  -1    0.24    0.45
  10  10  -1   -0.37    0.46
 -10  10   1   -0.54    0.38
 -10  10   1    0.32    0.64
   8 -10  -1    1.36    0.55
  -8 -10   1    0.33    0.50
  -8  10   1    0.66    0.66
   8  10  -1    0.82    0.47
   8  10  -1    0.86    0.42
  -8  10   1    0.52    0.37
   6 -10  -1    1.14    0.47
  -6 -10   1    1.13    0.46
   6  10  -1    1.27    0.42
  -6  10   1    1.63    0.42
  -6  10   1    0.82    0.48
   4 -10  -1    2.45    0.48
  -4 -10   1    2.01    0.46
   4 -10  -1    1.82    0.55
  -4 -10   1    2.47    0.53
  -4  10   1    2.47    0.44
   4  10  -1    2.54    0.52
   4  10  -1    3.13    0.58
  -4  10   1    2.20    0.47
   4  10  -1    1.66    0.48
   2 -10  -1    7.04    0.60
  -2 -10   1    8.65    0.72
   2 -10  -1    7.08    0.81
  -2 -10   1    8.30    0.72
   2  10  -1    8.33    0.79
  -2  10   1    7.92    0.58
   2  10  -1    5.83    0.67
  -2  10   1    5.51    0.67
   0 -10  -1    3.23    0.70
   0 -10   1    1.82    0.43
   0 -10  -1    2.70    0.38
   0 -10   1    3.41    0.58
   0  10   1    3.46    0.38
   0  10  -1    2.59    0.52
   0  10  -1    2.98    0.54
   0  10   1    2.81    0.54
   0  10  -1    1.54    0.41
   2 -10   1    1.18    0.43
  -2 -10  -1    1.09    0.53
   2 -10   1    1.06    0.48
  -2 -10  -1    1.59    0.29
   2 -10   1    0.92    0.38
  -2  10  -1    1.39    0.43
  -2  10  -1    1.53    0.46
   2  10   1    1.22    0.27
   2  10   1    1.47    0.47
  -4 -10  -1   -0.11    0.36
   4 -10   1    0.43    0.36
   4 -10   1    1.09    0.46
   4  10   1    0.40    0.26
   4  10   1    0.43    0.27
   4  10   1    0.91    0.42
  -4  10  -1    0.38    0.35
   6 -10   1    1.72    0.46
   6 -10   1    0.69    0.48
  -6 -10  -1    2.35    0.60
  -6  10  -1    1.49    0.50
  -6  10  -1    1.91    0.46
   6  10   1    2.04    0.52
   6  10   1    1.54    0.62
   6  10   1    1.99    0.42
  -8 -10  -1    0.91    0.57
   8 -10   1    1.00    0.58
  -8  10  -1    1.34    0.49
  -8  10  -1    1.09    0.59
   8  10   1    1.04    0.52
   8  10   1    2.12    0.51
  10 -10   1    0.62    0.64
 -10 -10  -1    1.51    0.73
 -10  10  -1    0.49    0.61
  10  10   1    0.20    0.51
 -10  10  -1    0.58    0.46
  10  10   1    0.08    0.42
  12 -10   1    4.24    0.92
 -12 -10  -1    4.67    1.02
  12  10   1    4.40    0.83
 -12  10  -1    6.31    1.03
 -12  10  -1    3.59    0.64
  12  10   1    5.56    0.86
 -14 -10  -1    0.35    0.67
  14 -10   1    0.64    0.68
  14  10   1    0.22    0.55
 -14  10  -1    0.74    0.47
 -14  10  -1    1.90    0.85
 -16 -10  -1    2.45    1.06
  16 -10   1   -0.47    0.67
  16  10   1    1.31    0.77
  16  10   1    1.87    0.71
 -16  10  -1    2.32    1.03
  15 -11  -1   -0.67    0.58
 -15 -11   1    0.21    0.69
  15  11  -1    0.28    0.50
  15  11  -1    0.31    0.65
 -15  11   1    1.42    0.92
  13 -11  -1   11.22    1.36
 -13 -11   1    9.80    1.37
 -13  11   1   12.89    1.52
  13  11  -1   12.26    1.05
 -13  11   1   10.68    0.87
  13  11  -1   12.37    1.44
 -11 -11   1    1.54    0.69
  11 -11  -1    0.62    0.61
 -11  11   1    1.16    0.81
 -11  11   1    0.60    0.43
  11  11  -1    1.93    0.71
  11  11  -1    1.11    0.51
  -9 -11   1    1.03    0.61
   9 -11  -1    2.50    0.72
   9  11  -1    1.41    0.53
  -9  11   1    1.96    0.78
  -9  11   1    1.81    0.50
   9  11  -1    2.35    0.70
  -7 -11   1    0.86    0.54
   7 -11  -1    2.07    0.58
  -7  11   1    0.88    0.46
  -7  11   1    1.41    0.64
   7  11  -1    1.88    0.56
   7  11  -1    0.98    0.48
   5 -11  -1   -0.08    0.36
  -5 -11   1   -0.70    0.35
  -5 -11   1    0.27    0.39
  -5  11   1    0.26    0.39
   5  11  -1   -0.08    0.34
  -3 -11   1    0.77    0.37
   3 -11  -1   -0.11    0.39
   3 -11  -1    0.98    0.35
  -3 -11   1    0.61    0.39
  -3  11   1    0.52    0.40
  -3  11   1    0.12    0.29
   3  11  -1   -0.03    0.36
   3  11  -1    0.09    0.35
   1 -11  -1   -0.11    0.43
  -1 -11   1   -0.26    0.36
   1 -11  -1    0.20    0.32
  -1 -11   1    0.44    0.34
   1  11  -1    0.19    0.36
  -1  11   1    0.10    0.32
  -1  11   1    0.44    0.26
   1  11  -1   -0.37    0.31
   1  11  -1    0.37    0.35
  -1 -11  -1    0.28    0.25
  -1 -11  -1    0.21    0.44
   1 -11   1    0.28    0.39
   1 -11   1    0.52    0.31
   1 -11   1   -0.10    0.34
  -1  11  -1    0.54    0.39
   1  11   1    0.44    0.25
   1  11   1    0.42    0.39
   3 -11   1    5.73    0.75
   3 -11   1    5.95    0.66
   3 -11   1    6.75    0.63
  -3 -11  -1    6.30    0.84
   3  11   1    6.17    0.76
   3  11   1    6.45    0.50
  -3  11  -1    6.31    0.74
   5 -11   1   -0.40    0.26
   5 -11   1    0.33    0.45
  -5 -11  -1   -0.63    0.36
   5  11   1    0.47    0.39
   5  11   1    0.65    0.31
   5  11   1    0.29    0.29
  -5  11  -1    0.03    0.36
  -7 -11  -1   16.34    1.29
   7 -11   1   13.32    1.27
   7  11   1   15.39    1.14
   7  11   1   13.41    0.90
   7  11   1   14.77    0.93
  -7  11  -1   14.98    1.11
  -7  11  -1   14.78    1.03
   9 -11   1    0.65    0.64
  -9 -11  -1    1.36    0.70
   9  11   1    0.56    0.59
   9  11   1    0.55    0.43
  -9  11  -1    0.99    0.53
  -9  11  -1    0.88    0.61
 -11 -11  -1    0.25    0.66
  11 -11   1    0.90    0.69
 -11  11  -1    0.39    0.67
 -11  11  -1    1.20    0.49
  11  11   1    0.49    0.55
 -13 -11  -1    2.51    0.85
  13 -11   1    1.13    0.80
  13  11   1    0.94    0.62
 -13  11  -1    1.86    0.57
 -13  11  -1    2.95    0.94
  13  11   1    3.10    0.76
 -15 -11  -1    2.91    1.01
  15 -11   1    4.04    1.07
  15  11   1    3.92    0.86
 -15  11  -1    4.14    1.09
  15  11   1    2.95    0.81
 -15  11  -1    3.37    0.62
 -14 -12   1   -0.94    0.57
  14 -12  -1    0.74    0.78
  14  12  -1    0.36    0.66
 -14  12   1   -1.12    0.74
 -14  12   1   -0.24    0.42
 -12 -12   1    0.20    0.63
  12 -12  -1   -1.04    0.49
  12  12  -1    0.95    0.63
 -12  12   1    0.04    0.73
 -12  12   1   -0.03    0.44
  10 -12  -1    0.38    0.61
 -10 -12   1    0.64    0.69
  10  12  -1    0.44    0.62
  10  12  -1    1.88    0.69
 -10  12   1    0.98    0.53
 -10  12   1    2.29    0.85
   8 -12  -1   28.61    1.63
  -8 -12   1   31.76    1.79
   8  12  -1   32.70    1.71
   8  12  -1   33.13    1.64
  -8  12   1   32.73    1.86
  -8  12   1   33.05    1.56
   6 -12  -1    0.65    0.48
  -6 -12   1    0.83    0.48
  -6 -12   1    0.96    0.54
  -6  12   1    0.11    0.41
   6  12  -1    0.99    0.46
   4 -12  -1    1.89    0.63
  -4 -12   1    1.48    0.46
   4 -12  -1    1.67    0.47
  -4 -12   1    1.89    0.52
  -4  12   1    2.13    0.54
   4  12  -1    1.24    0.50
  -4  12   1    1.46    0.45
  -2 -12   1    6.92    0.78
  -2 -12   1    6.56    0.71
   2 -12  -1    6.25    0.84
   2 -12  -1    8.08    0.66
   2  12  -1    7.02    0.79
   2  12  -1    6.94    0.73
  -2  12   1    7.19    0.83
   0 -12   1    9.25    0.79
   0 -12  -1    8.65    0.65
   0 -12   1    9.74    0.83
   0 -12  -1    8.11    0.92
   0  12  -1    6.13    0.73
   0  12   1    9.81    0.97
   0  12   1    8.97    0.58
   0  12  -1    9.61    0.77
   2 -12   1    0.83    0.43
  -2 -12  -1    0.79    0.27
  -2 -12  -1    0.33    0.44
   2 -12   1    1.08    0.38
   2 -12   1    1.01    0.47
  -2  12  -1    0.79    0.41
   2  12   1    1.03    0.30
   2  12   1    0.88    0.43
  -4 -12  -1    7.64    0.96
   4 -12   1    8.24    0.90
   4 -12   1    7.84    0.80
   4 -12   1    7.87    0.75
   4  12   1    7.99    0.87
   4  12   1    8.78    0.61
  -4  12  -1    7.55    0.87
  -6 -12  -1   -0.73    0.45
  -6  12  -1    0.05    0.49
   6  12   1   -0.15    0.30
  -6  12  -1    0.23    0.45
   6  12   1    0.08    0.34
   8 -12   1   16.52    1.35
  -8 -12  -1   16.84    1.45
   8  12   1   11.64    1.23
  -8  12  -1   14.25    1.13
  -8  12  -1   16.24    1.24
   8  12   1   15.45    1.03
  10 -12   1    2.14    0.79
 -10 -12  -1    0.15    0.66
  10  12   1    0.90    0.50
 -10  12  -1    0.66    0.69
  10  12   1    0.15    0.52
 -10  12  -1    1.51    0.60
  12 -12   1   -0.22    0.64
 -12 -12  -1   -0.31    0.65
 -12  12  -1    1.77    0.80
  12  12   1    1.22    0.56
 -12  12  -1    1.00    0.55
  12  12   1    0.58    0.61
  14 -12   1   -0.34    0.73
 -14 -12  -1   -0.27    0.63
  14  12   1    0.79    0.60
  14  12   1    1.40    0.70
 -14  12  -1    0.34    0.52
 -14  12  -1    0.62    0.77
 -13 -13   1   -0.19    0.63
  13 -13  -1    0.02    0.66
 -13  13   1    0.38    0.46
  13  13  -1    0.02    0.58
  13  13  -1    0.92    0.62
 -11 -13   1    1.13    0.70
  11 -13  -1    1.75    0.77
  11  13  -1    3.35    0.73
 -11  13   1    3.17    0.69
  11  13  -1    1.79    0.70
 -11  13   1    0.90    0.82
   9 -13  -1    2.95    0.75
  -9 -13   1    3.54    0.86
   9  13  -1    2.74    0.70
  -9  13   1    3.22    0.92
  -9  13   1    3.54    0.71
   9  13  -1    3.91    0.82
   7 -13  -1   53.46    2.22
  -7 -13   1   53.63    2.31
   7  13  -1   54.46    2.25
   7  13  -1   52.06    2.20
  -7  13   1   52.54    2.16
   5 -13  -1   45.19    2.11
   5 -13  -1   43.40    1.83
  -5 -13   1   42.50    1.85
  -5 -13   1   46.25    1.97
   5  13  -1   41.82    1.91
  -5  13   1   41.76    1.88
   3 -13  -1    0.40    0.39
  -3 -13   1   -0.63    0.37
  -3 -13   1    0.75    0.41
   3 -13  -1   -0.22    0.46
  -3  13   1    0.32    0.42
  -3  13   1    0.25    0.33
   1 -13  -1   -0.82    0.44
   1 -13  -1   -0.42    0.26
  -1 -13   1   -0.36    0.33
  -1 -13   1    0.65    0.44
   1  13  -1    0.27    0.48
  -1  13   1   -0.33    0.35
  -1  13   1    0.02    0.28
   1  13  -1    0.67    0.43
   1 -13   1   -0.25    0.30
  -1 -13  -1   -0.23    0.45
   1 -13   1    0.35    0.40
   1 -13   1    0.31    0.41
  -1  13  -1    0.66    0.48
   1  13   1   -0.06    0.25
  -3 -13  -1    2.17    0.65
   3 -13   1    1.25    0.44
   3 -13   1    2.55    0.63
   3 -13   1    0.92    0.49
   3  13   1    0.57    0.46
  -3  13  -1    2.37    0.90
   3  13   1    0.88    0.33
   5 -13   1    7.63    0.86
   5 -13   1    9.70    1.12
  -5 -13  -1    6.62    0.95
   5  13   1    7.17    0.67
  -5  13  -1    4.09    1.12
   5  13   1    7.30    0.94
  -7 -13  -1    7.75    1.09
   7 -13   1    7.36    1.05
   7  13   1    7.23    0.77
  -7  13  -1    6.71    0.87
   7  13   1   10.13    1.15
   7  13   1    7.62    0.81
  -7  13  -1    7.43    0.95
  -9 -13  -1   22.45    1.72
   9 -13   1   26.91    1.76
   9  13   1   23.89    1.62
  -9  13  -1   23.51    1.56
  -9  13  -1   25.82    1.47
   9  13   1   25.68    1.38
 -11 -13  -1    3.33    0.93
  11 -13   1    2.94    0.95
 -11  13  -1    3.73    0.76
  11  13   1    2.64    0.75
 -11  13  -1    3.30    0.86
  11  13   1    3.23    0.70
 -13 -13  -1    0.70    0.75
  13 -13   1    1.09    0.79
 -13  13  -1    0.14    0.53
  13  13   1   -0.11    0.53
 -13  13  -1    0.91    0.73
  13  13   1    0.95    0.66
 -14 -14   1    0.43    0.66
  14 -14  -1    0.27    0.71
 -14  14   1    0.23    0.88
  14  14  -1   -0.16    0.56
  14  14  -1    0.01    0.78
 -14  14   1   -0.34    0.49
 -12 -14   1    0.41    0.71
  12 -14  -1   -0.73    0.58
  12  14  -1    1.31    0.67
 -12  14   1    0.37    0.79
  12  14  -1    0.33    0.59
 -12  14   1   -0.16    0.65
 -10 -14   1    4.02    0.95
  10 -14  -1    2.80    0.80
  10  14  -1    2.98    0.74
  10  14  -1    2.69    0.79
 -10  14   1    1.47    0.77
 -10  14   1    1.91    0.66
  -8 -14   1    0.85    0.62
   8 -14  -1   -0.11    0.55
   8  14  -1    0.47    0.54
   8  14  -1    0.84    0.57
  -8  14   1    0.91    0.55
   6 -14  -1    1.43    0.55
   6 -14  -1   -0.28    0.63
  -6 -14   1   -0.16    0.47
  -6  14   1    0.45    0.51
   6  14  -1    0.07    0.51
   4 -14  -1   38.31    1.98
  -4 -14   1   32.14    1.61
   4 -14  -1   36.34    1.60
  -4 -14   1   35.85    1.71
   4  14  -1   35.60    1.74
  -4  14   1   35.48    1.76
   2 -14  -1    4.47    0.63
  -2 -14   1    1.76    0.55
  -2 -14   1    2.25    0.59
   2 -14  -1    2.31    0.72
  -2  14   1    2.94    0.51
  -2  14   1    2.34    0.60
   2  14  -1    1.74    0.59
   0 -14  -1    6.39    0.92
   0 -14   1    7.26    0.84
   0 -14   1    8.39    0.91
   0 -14  -1    7.82    0.65
   0  14   1    6.00    0.59
   0  14   1    5.82    0.86
   0  14  -1    7.88    0.94
  -2 -14  -1    1.41    0.67
  -2 -14  -1    0.92    0.34
   2 -14   1    1.01    0.53
   2 -14   1    0.89    0.51
   2  14   1    1.09    0.35
  -2  14  -1    2.18    0.62
   2  14   1    1.27    0.55
  -4 -14  -1    3.83    0.80
   4 -14   1    3.62    0.69
   4 -14   1    4.40    0.81
   4  14   1    3.69    0.52
   4  14   1    2.51    0.47
   4  14   1    4.54    0.79
  -4  14  -1    4.22    0.77
   6 -14   1   46.85    2.19
   6 -14   1   46.37    2.01
  -6 -14  -1   44.06    2.21
  -6  14  -1   44.43    2.01
   6  14   1   42.87    1.72
   6  14   1   43.93    1.69
   6  14   1   46.47    2.19
  -8 -14  -1    6.16    1.02
   8 -14   1    6.60    1.08
  -8  14  -1    5.16    0.85
  -8  14  -1    7.77    1.04
   8  14   1    6.14    0.78
   8  14   1    6.51    0.98
  10 -14   1    8.84    1.28
 -10 -14  -1    9.13    1.31
  10  14   1    8.88    0.95
 -10  14  -1    7.55    0.99
  10  14   1   10.05    1.26
 -10  14  -1   10.00    1.16
  12 -14   1    0.20    0.70
 -12 -14  -1    0.03    0.65
 -12  14  -1    0.39    0.76
 -12  14  -1   -0.46    0.51
  12  14   1   -0.06    0.49
  12  14   1   -0.43    0.57
  14 -14   1   -0.31    0.73
 -14 -14  -1    0.71    0.85
  14  14   1    0.16    0.56
 -14  14  -1   -0.58    0.54
  14  14   1    0.03    0.64
 -13 -15   1    0.36    0.69
  13 -15  -1    1.48    0.84
  13  15  -1    0.29    0.64
  13  15  -1    2.48    0.82
 -13  15   1    2.51    1.02
 -13  15   1    0.61    0.58
 -11 -15   1    0.24    0.58
  11 -15  -1   -0.13    0.63
 -11  15   1    0.57    0.79
  11  15  -1   -0.70    0.50
  11  15  -1    0.43    0.63
 -11  15   1   -0.37    0.50
  -9 -15   1    0.49    0.64
   9 -15  -1    2.75    0.81
   9  15  -1    1.72    0.71
  -9  15   1    1.86    0.68
   9  15  -1    1.66    0.68
   7 -15  -1    7.11    1.08
   7 -15  -1    5.42    0.91
  -7 -15   1    5.73    0.92
  -7  15   1    5.03    0.88
   7  15  -1    5.30    0.92
   7  15  -1    5.50    1.03
  -5 -15   1    0.53    0.57
   5 -15  -1    0.01    0.49
   5 -15  -1    0.60    0.66
  -5 -15   1    0.01    0.45
  -5  15   1   -0.06    0.48
   5  15  -1   -0.49    0.43
   3 -15  -1    7.71    0.84
  -3 -15   1    6.78    0.86
   3 -15  -1    7.58    1.10
  -3 -15   1    7.46    0.91
  -3  15   1    8.16    1.03
   3  15  -1    7.14    0.98
  -1 -15   1    1.59    0.55
   1 -15  -1    1.01    0.43
  -1 -15   1    0.67    0.49
   1  15  -1    0.50    0.51
  -1  15   1    0.74    0.54
  -1  15   1    1.00    0.39
  -1 -15  -1    0.81    0.38
  -1 -15  -1    0.73    0.64
   1 -15   1    1.52    0.57
   1 -15   1    1.60    0.59
  -1  15  -1    1.11    0.57
   1  15   1    0.71    0.38
   1  15   1    1.61    0.58
   3 -15   1   10.54    1.02
   3 -15   1   11.38    1.17
  -3 -15  -1   11.96    0.77
  -3 -15  -1   10.93    1.24
   3  15   1   10.09    0.73
  -3  15  -1    9.91    1.05
   3  15   1    9.62    1.10
   5 -15   1    2.27    0.74
  -5 -15  -1    2.25    0.74
   5 -15   1    1.54    0.65
   5  15   1    0.07    0.55
   5  15   1    2.36    0.49
   5  15   1    2.11    0.48
  -5  15  -1    3.10    0.74
   7 -15   1    2.30    0.74
  -7 -15  -1    1.57    0.73
   7 -15   1    2.89    0.81
  -7  15  -1    1.05    0.61
   7  15   1    1.72    0.50
   7  15   1    2.03    0.69
   9 -15   1    9.43    1.30
  -9 -15  -1   13.80    1.56
   9  15   1   10.93    1.32
   9  15   1   13.68    1.05
  -9  15  -1   12.45    1.24
 -11 -15  -1    0.91    0.75
 -11  15  -1   -0.29    0.56
  11  15   1    0.65    0.53
 -11  15  -1    0.65    0.71
  11  15   1   -0.30    0.55
 -13 -15  -1    0.30    0.71
  13 -15   1   -0.06    0.73
  13  15   1    1.53    0.67
 -13  15  -1    0.76    0.64
 -13  15  -1    0.11    0.72
  13  15   1    0.03    0.65
  12 -16  -1    0.95    0.81
 -12 -16   1    0.28    0.70
  12  16  -1   -1.19    0.53
  12  16  -1   -0.17    0.53
 -12  16   1   -0.10    0.80
 -12  16   1   -0.30    0.55
 -10 -16   1   -0.25    0.61
  10 -16  -1    0.63    0.71
  10  16  -1   -0.45    0.51
  10  16  -1    0.68    0.65
 -10  16   1    0.11    0.56
  -8 -16   1   -0.82    0.49
   8 -16  -1   -0.18    0.55
   8 -16  -1    0.33    0.76
   8  16  -1   -0.39    0.55
   8  16  -1    0.58    0.57
  -8  16   1   -0.27    0.54
   6 -16  -1    0.28    0.67
  -6 -16   1   -0.57    0.50
  -6 -16   1   -0.36    0.42
   6 -16  -1    1.06    0.69
  -6  16   1    0.27    0.54
   6  16  -1    0.04    0.53
  -4 -16   1   14.11    1.13
   4 -16  -1   13.54    1.36
   4 -16  -1   14.77    1.12
  -4 -16   1   15.52    1.24
  -4  16   1   13.94    1.32
   4  16  -1   15.50    1.28
  -2 -16   1   20.16    1.29
   2 -16  -1   23.09    1.65
   2 -16  -1   19.59    1.15
  -2 -16   1   17.95    1.30
  -2  16   1   19.42    1.43
   2  16  -1   21.28    1.45
   0 -16  -1    3.01    0.54
   0 -16   1    3.31    0.74
   0 -16   1    2.96    0.73
   0 -16  -1    3.07    0.85
   0  16   1    3.43    0.78
   0  16  -1    3.60    0.81
   0  16   1    2.58    0.48
   2 -16   1   -0.02    0.52
  -2 -16  -1   -0.40    0.59
  -2 -16  -1   -0.49    0.32
   2 -16   1   -0.56    0.49
  -2  16  -1   -0.47    0.49
   2  16   1    0.26    0.47
   2  16   1    0.28    0.53
  -4 -16  -1   11.49    1.30
   4 -16   1   15.18    1.30
   4 -16   1   14.47    1.19
   4  16   1   12.31    0.86
   4  16   1    9.36    1.13
   4  16   1    8.92    0.76
  -4  16  -1   11.47    1.15
   6 -16   1    4.97    0.96
  -6 -16  -1    5.17    0.97
   6 -16   1    4.70    0.85
   6  16   1    2.93    0.84
  -6  16  -1    4.31    0.88
   6  16   1    3.85    0.62
   6  16   1    5.48    0.68
   8 -16   1    3.34    0.80
  -8 -16  -1    2.60    0.85
   8 -16   1    2.59    0.89
  -8  16  -1    2.45    0.77
   8  16   1    2.69    0.60
   8  16   1    1.16    0.68
 -10 -16  -1    0.66    0.87
  10 -16   1    1.04    0.79
  10  16   1    0.29    0.62
 -10  16  -1    1.05    0.67
  10  16   1    0.56    0.48
 -12 -16  -1   -0.07    0.75
  12 -16   1    0.47    0.85
  12  16   1    0.78    0.57
  12  16   1   -0.31    0.61
 -12  16  -1   -0.58    0.66
 -12  16  -1   -0.20    0.59
 -11 -17   1    0.91    0.74
  11 -17  -1    1.03    1.44
  11 -17  -1    1.24    0.96
  11  17  -1   -0.21    0.57
 -11  17   1    0.86    0.61
  11  17  -1    1.71    0.78
   9 -17  -1    1.18    0.72
  -9 -17   1    1.06    0.69
   9 -17  -1    0.90    0.81
  -9  17   1    2.22    0.72
   9  17  -1    0.82    0.62
   9  17  -1    1.80    0.76
  -7 -17   1    0.04    0.57
   7 -17  -1   -0.60    0.64
   7 -17  -1    0.45    0.59
  -7  17   1    0.50    0.59
   7  17  -1    0.65    0.64
   7  17  -1    0.07    0.51
   5 -17  -1    0.31    0.72
   5 -17  -1   -1.06    0.44
  -5 -17   1    0.59    0.55
  -5 -17   1    0.25    0.60
   5  17  -1    1.69    0.67
  -5  17   1   -0.13    0.54
   3 -17  -1   12.05    1.36
  -3 -17   1   12.49    1.06
   3 -17  -1   12.04    1.03
  -3 -17   1   11.05    1.14
   3  17  -1    8.74    1.08
  -3  17   1   10.18    1.19
   1 -17  -1    0.44    0.45
  -1 -17   1    0.18    0.51
   1 -17  -1    0.00    0.64
  -1 -17   1    0.77    0.56
  -1  17   1    0.97    0.62
   1  17  -1    0.26    0.51
   1 -17   1   -0.23    0.54
  -1 -17  -1   -0.74    0.58
   1 -17   1    0.27    0.58
  -1 -17  -1   -0.07    0.37
  -1  17  -1   -0.23    0.52
   1  17   1   -0.47    0.31
   1  17   1    0.47    0.57
  -3 -17  -1    3.09    0.53
   3 -17   1    2.03    0.72
  -3 -17  -1    2.10    0.75
   3 -17   1    2.52    0.67
   3  17   1    2.51    0.50
   3  17   1    3.35    0.83
  -3  17  -1    3.13    0.81
   5 -17   1    8.27    0.99
  -5 -17  -1    8.27    1.20
   5 -17   1    6.10    1.09
   5  17   1    6.44    1.04
   5  17   1    5.75    0.67
   5  17   1    7.24    0.73
  -5  17  -1    6.78    0.99
   7 -17   1    1.30    0.70
  -7 -17  -1    1.19    0.76
   7 -17   1    0.29    0.63
   7  17   1    0.09    0.58
  -7  17  -1   -0.40    0.53
   7  17   1    0.83    0.43
   9 -17   1    1.27    0.75
   9 -17   1   -0.38    0.65
   9  17   1    1.16    0.52
   9  17   1   -0.55    0.55
  -9  17  -1    1.11    0.69
  11 -17   1    1.78    0.85
 -11 -17  -1    0.81    0.79
  11  17   1    1.07    0.75
 -11  17  -1    2.15    0.79
  11  17   1    1.42    0.59
  10 -18  -1    3.43    1.33
  10 -18  -1    5.70    1.08
 -10  18   1    3.29    0.88
  10  18  -1    4.32    0.97
  10  18  -1    6.18    1.07
   8 -18  -1   -0.48    0.68
  -8 -18   1   -0.81    0.51
   8 -18  -1    0.45    0.62
  -8  18   1    0.40    0.63
   8  18  -1    0.46    0.57
   8  18  -1    0.15    0.61
   6 -18  -1   -0.27    0.57
   6 -18  -1    0.53    0.72
  -6 -18   1   -0.76    0.54
  -6 -18   1    0.58    0.52
   6  18  -1   -0.32    0.53
  -6  18   1    0.67    0.64
  -4 -18   1   -0.06    0.49
  -4 -18   1    0.63    0.56
   4 -18  -1   -0.29    0.48
   4 -18  -1   -0.54    0.64
   4  18  -1    1.17    0.66
  -4  18   1   -0.12    0.61
  -2 -18   1    1.94    0.67
   2 -18  -1    2.91    0.88
   2 -18  -1    0.77    0.53
   2  18  -1    1.66    0.70
  -2  18   1    0.90    0.64
   0 -18  -1    2.42    0.85
   0 -18  -1    1.68    0.49
   0 -18   1    1.89    0.67
   0 -18   1    2.54    0.74
   0  18   1    1.97    0.72
   0  18  -1    1.87    0.72
   0  18   1    2.19    0.73
  -2 -18  -1    4.07    0.61
   2 -18   1    4.08    0.87
  -2 -18  -1    4.38    0.98
   2 -18   1    4.27    0.83
   2  18   1    4.75    0.99
   2  18   1    3.02    0.53
  -2  18  -1    3.26    0.84
   4 -18   1   -0.77    0.55
   4 -18   1    0.24    0.59
  -4 -18  -1    0.41    0.71
   4  18   1   -0.34    0.37
   4  18   1    0.29    0.59
   4  18   1    0.75    0.44
  -4  18  -1    0.73    0.66
   6 -18   1    0.50    0.69
   6 -18   1    0.74    0.66
  -6 -18  -1    0.14    0.67
   6  18   1   -0.54    0.33
   6  18   1   -0.98    0.53
  -6  18  -1    0.01    0.59
  -8 -18  -1    1.10    0.92
   8 -18   1    1.22    0.77
   8 -18   1   -0.42    0.62
   8  18   1   -0.61    0.56
   8  18   1    0.07    0.44
  -8  18  -1   -0.19    0.58
  10 -18   1   -0.16    0.72
 -10 -18  -1   -0.61    0.64
  10 -18   1   -0.19    0.74
  10  18   1   -0.76    0.46
 -10  18  -1    0.10    0.61
  10  18   1   -0.63    0.59
   9 -19  -1   -0.67    0.62
   9 -19  -1    0.10    0.81
  -9 -19   1   -0.64    0.59
  -9  19   1    0.96    0.75
   9  19  -1    0.31    0.71
   9  19  -1    0.14    0.62
   7 -19  -1   -0.44    0.63
  -7 -19   1    0.01    0.60
   7 -19  -1    0.36    0.67
  -7  19   1   -0.74    0.50
   7  19  -1   -0.48    0.48
  -5 -19   1    0.80    0.54
   5 -19  -1   -0.74    0.65
   5 -19  -1    0.65    0.61
  -5 -19   1    0.03    0.56
   5  19  -1   -0.22    0.57
  -5  19   1   -0.27    0.56
   3 -19  -1    5.72    1.11
   3 -19  -1    5.36    0.81
  -3 -19   1    5.27    0.94
  -3 -19   1    5.92    0.92
  -3  19   1    5.15    0.95
   3  19  -1    4.88    0.99
  -1 -19   1   -0.18    0.54
   1 -19  -1   -0.37    0.65
  -1 -19   1   -0.74    0.44
   1 -19  -1    0.37    0.47
   1  19  -1    0.32    0.62
  -1  19   1    0.21    0.61
   1 -19   1    1.30    0.64
  -1 -19  -1    1.39    0.82
  -1 -19  -1    0.32    0.40
  -1  19  -1    0.99    0.64
   1  19   1   -0.09    0.57
  -3 -19  -1    1.40    0.79
   3 -19   1    0.07    0.63
  -3 -19  -1    0.98    0.42
   3  19   1    1.29    0.72
  -3  19  -1    0.04    0.61
   3  19   1    1.23    0.44
   5 -19   1    1.34    0.74
   5 -19   1    0.89    0.68
  -5 -19  -1    1.33    0.83
  -5  19  -1    1.93    0.79
   5  19   1    1.13    0.45
   5  19   1    0.78    0.67
   5  19   1    1.46    1.17
  -7 -19  -1    0.67    0.84
   7 -19   1   -0.08    0.64
   7 -19   1   -0.41    0.61
  -7  19  -1   -0.26    0.61
   7  19   1    0.08    0.41
   7  19   1    0.96    0.74
   9 -19   1    0.15    0.74
   9 -19   1    0.24    0.74
  -9 -19  -1    0.03    0.80
   9  19   1    0.58    0.47
   9  19   1    0.05    0.71
   8 -20  -1    0.20    0.68
   8 -20  -1    0.21    0.94
  -8 -20   1    0.32    0.64
   8  20  -1    0.30    0.66
  -8  20   1    0.71    0.92
   8  20  -1    0.82    0.64
   6 -20  -1    0.71    0.62
  -6 -20   1   -0.35    0.65
   6 -20  -1    0.80    0.77
   6  20  -1   -0.49    0.57
   4 -20  -1   -1.32    0.64
   4 -20  -1    0.84    0.64
  -4 -20   1    1.02    0.62
  -4 -20   1    0.05    0.61
   4  20  -1    0.24    0.65
  -2 -20   1    2.95    0.81
  -2 -20   1    1.86    0.69
   2 -20  -1    0.07    0.73
   2 -20  -1    3.02    0.68
   2  20  -1    2.75    0.84
   0 -20   1    0.64    0.61
   0 -20   1   -0.95    0.57
   0 -20  -1    0.53    0.45
   0 -20  -1    0.15    0.70
   0  20  -1    0.35    0.76
   0  20   1    0.96    0.88
  -2 -20  -1    0.12    0.70
   2 -20   1    0.56    0.64
  -2 -20  -1    0.08    0.39
   2 -20   1   -1.07    0.52
   2  20   1   -0.87    0.53
  -2  20  -1    0.74    0.79
   4 -20   1    0.67    0.69
  -4 -20  -1    1.17    0.78
   4 -20   1    1.51    0.77
   4  20   1    0.79    0.74
   4  20   1    0.78    0.43
  -4  20  -1    0.25    0.64
   6 -20   1    0.45    0.69
   6 -20   1   -0.08    0.63
   6  20   1   -0.28    0.66
   6  20   1   -0.04    0.38
  -6  20  -1   -0.13    0.60
   8 -20   1    0.35    0.75
  -8 -20  -1   -0.55    0.70
   8 -20   1   -1.48    0.58
  -8  20  -1    0.34    0.67
   8  20   1   -0.27    0.68
   8  20   1   -0.37    0.40
  -7 -21   1    0.48    0.70
   7 -21  -1   -0.08    0.63
   7  21  -1   -0.85    0.62
  -7  21   1   -0.20    0.68
   7  21  -1    0.42    0.63
  -5 -21   1   -0.38    0.60
  -5 -21   1   -0.22    0.52
   5 -21  -1   -1.33    0.67
   5 -21  -1   -0.51    0.53
   5  21  -1    0.38    0.69
  -5  21   1   -0.27    0.60
  -3 -21   1   -0.55    0.57
  -3 -21   1   -0.24    0.54
   3 -21  -1    1.02    0.80
   3  21  -1    0.12    0.68
  -3  21   1   -0.47    0.61
   1 -21  -1    0.41    0.70
   1 -21  -1    0.29    0.47
  -1 -21   1   -0.40    0.48
  -1 -21   1    0.41    0.63
   1  21  -1    0.82    0.67
  -1  21   1    0.34    0.66
   1 -21   1    0.17    0.64
  -1 -21  -1    0.26    0.71
  -1 -21  -1    0.22    0.42
   1 -21   1   -0.15    0.61
  -1  21  -1    0.28    0.63
   1  21   1   -0.01    0.62
   3 -21   1    0.06    0.63
  -3 -21  -1    0.93    0.80
   3 -21   1    1.16    0.73
  -3  21  -1    1.17    0.77
   3  21   1   -1.12    0.53
   5 -21   1   -0.84    0.64
   5 -21   1    0.35    0.69
  -5 -21  -1    0.85    0.88
  -5  21  -1    0.49    0.75
   5  21   1    1.13    0.48
   5  21   1    0.46    0.72
   7 -21   1    0.80    0.83
   7 -21   1    0.21    0.69
  -7 -21  -1   -1.35    0.62
  -7  21  -1    2.29    0.89
   7  21   1    0.59    0.75
   7  21   1    0.90    0.45
  -4 -22   1    0.64    0.55
   4 -22  -1   -0.29    0.57
   4 -22  -1   -0.22    0.72
  -4 -22   1    0.72    0.71
  -4  22   1   -0.29    0.64
   4  22  -1   -0.95    0.58
  -2 -22   1    0.31    0.64
  -2 -22   1   -0.25    0.59
   2 -22  -1    0.17    0.57
   2 -22  -1   -0.51    0.71
   2  22  -1   -0.56    0.55
  -2  22   1   -0.03    0.74
   0 -22  -1    0.46    0.78
   0 -22   1   -0.58    0.61
   0 -22  -1   -0.22    0.45
   0 -22   1   -0.03    0.60
   0  22   1    0.43    0.66
   0  22  -1    0.05    0.68
  -2 -22  -1    0.08    0.83
  -2 -22  -1    0.21    0.45
   2 -22   1    0.42    0.67
   2 -22   1    0.63    0.67
   2  22   1    0.85    0.75
  -2  22  -1    0.69    0.72
  -4 -22  -1    0.14    0.79
   4 -22   1   -0.14    0.65
   4 -22   1   -1.08    0.59
  -4  22  -1    0.30    0.67
   4  22   1    0.07    0.67
   4  22   1    1.76    0.51
   1 -23  -1    0.04    0.50
  -1 -23   1   -0.54    0.55
  -1 -23   1    0.28    0.69
   1 -23  -1    0.32    0.79
  -1  23   1    0.40    0.74
   1  23  -1    0.67    0.74
  -1 -23  -1    0.22    0.83
   1 -23   1    0.61    0.74
  -1 -23  -1    0.50    0.54
   1 -23   1   -0.17    0.59
  -1  23  -1    0.47    0.72
   1  23   1    1.33    0.79
 -16   0   2    4.49    1.05
  16   0  -2    7.25    1.23
  14   0  -2    9.12    1.26
 -14   0   2    6.79    1.15
 -12   0   2   32.93    1.92
  12   0  -2   29.34    1.74
  10   0  -2   54.80    2.28
 -10   0   2   52.09    2.30
   8   0  -2    0.96    0.43
  -8   0   2    0.91    0.46
   6   0  -2   29.59    1.34
   6   0  -2   30.28    0.96
   6   0  -2   28.69    1.34
   6   0  -2   27.90    1.34
  -6   0   2   27.93    1.38
   6   0  -2   29.23    0.94
   4   0  -2    0.81    0.24
  -4   0   2    1.05    0.35
   4   0  -2    0.46    0.30
   4   0  -2    0.87    0.30
   4   0  -2    0.43    0.21
   4   0  -2    0.79    0.33
   2   0  -2  168.83    4.52
   2   0  -2  169.80    4.49
   2   0  -2  174.78    4.55
  -2   0   2  166.98    4.51
  -2   0   2  172.51    4.50
  -2   0   2  171.60    4.55
   0   0  -2   99.29    2.68
   0   0  -2   96.35    2.63
   0   0   2   95.05    2.78
   0   0   2   96.54    2.68
   0   0  -2  100.21    2.64
   0   0  -2   96.07    2.80
  -4   0  -2   56.71    1.82
   4   0   2   56.76    1.92
   4   0   2   57.54    1.85
   4   0   2   58.84    1.87
  -4   0  -2   57.86    1.93
   6   0   2   22.70    1.12
  -6   0  -2   20.52    1.14
   6   0   2   19.95    1.06
  -6   0  -2   20.81    1.04
  -6   0  -2   20.22    1.03
   6   0   2   20.52    1.11
  -8   0  -2   21.28    1.08
   8   0   2   22.35    1.23
  -8   0  -2   22.52    1.09
  -8   0  -2   22.83    1.26
 -10   0  -2    5.14    0.65
 -10   0  -2    5.09    0.62
 -10   0  -2    6.32    0.92
  10   0   2    4.57    0.78
  12   0   2    8.52    1.08
 -12   0  -2    8.18    0.77
 -12   0  -2    9.05    0.82
 -12   0  -2    9.79    1.25
 -14   0  -2   60.73    2.06
 -14   0  -2   55.84    2.01
 -14   0  -2   66.93    2.96
  16   0   2    2.94    0.91
 -16   0  -2    2.32    0.93
  17  -1  -2   -0.58    0.60
 -17  -1   2    0.16    0.67
 -17   1   2    0.07    0.75
  17   1  -2   -0.78    0.57
  13  -1  -2   13.40    1.47
 -13  -1   2   12.38    1.41
  13   1  -2   11.65    1.35
 -13   1   2   12.01    1.40
 -11  -1   2   16.94    1.41
  11  -1  -2   14.76    1.22
  11   1  -2   13.62    1.17
 -11   1   2   12.58    1.30
  -9  -1   2    1.79    0.57
   9  -1  -2    1.63    0.53
   9   1  -2    1.69    0.52
  -9   1   2    1.96    0.60
   7  -1  -2    0.71    0.42
  -7  -1   2    0.32    0.44
   7   1  -2    0.74    0.41
  -7   1   2    0.47    0.45
   5  -1  -2   51.24    1.50
   5  -1  -2   48.86    1.80
  -5  -1   2   51.73    1.84
   5  -1  -2   48.36    1.83
   5   1  -2   50.95    1.81
   5   1  -2   52.75    1.86
  -5   1   2   51.22    1.90
   5   1  -2   50.95    1.55
   5   1  -2   49.91    1.83
   5   1  -2   50.84    1.51
  -3  -1   2    8.94    0.58
   3  -1  -2    9.45    0.61
   3  -1  -2    9.75    0.58
  -3  -1   2    9.34    0.62
   3  -1  -2   10.22    0.53
   3  -1  -2    9.22    0.57
   3   1  -2    7.93    0.55
   3   1  -2   10.19    0.56
   3   1  -2    9.34    0.62
   3   1  -2    9.26    0.52
  -3   1   2    9.33    0.54
  -1  -1   2    5.58    0.46
   1  -1  -2    5.65    0.39
   1  -1  -2    5.24    0.48
   1  -1  -2    5.34    0.45
  -1  -1   2    4.55    0.38
  -1   1   2    6.12    0.53
   1   1  -2    5.90    0.52
   1   1  -2    6.15    0.53
   1   1  -2    6.60    0.54
  -1   1   2    4.71    0.39
   1   1  -2    4.75    0.37
   1  -1   2 1000.00   33.94
   1   1   2  993.96   33.30
  -3  -1  -2   75.84    2.38
  -3  -1  -2   77.39    2.24
   3  -1   2   78.06    2.23
  -3  -1  -2   80.17    2.34
   3   1   2   80.00    2.28
  -3   1  -2   77.11    2.24
  -3   1  -2   79.28    2.54
  -3   1  -2   81.27    2.34
   3   1   2   79.31    2.45
  -3   1  -2   80.25    2.44
   3   1   2   77.21    2.33
  -5  -1  -2    5.06    0.57
   5  -1   2    6.09    0.69
  -5  -1  -2    4.74    0.58
   5  -1   2    6.29    0.63
  -5  -1  -2    4.24    0.60
  -5   1  -2    4.18    0.57
   5   1   2    4.98    0.63
  -5   1  -2    4.60    0.61
  -5   1  -2    4.79    0.55
   5   1   2    4.71    0.63
   5   1   2    4.96    0.60
  -5   1  -2    5.78    0.63
   7  -1   2   18.46    1.04
  -7  -1  -2   17.73    0.94
  -7  -1  -2   16.44    1.11
  -7  -1  -2   18.56    1.00
   7  -1   2   17.17    1.06
   7   1   2   17.82    0.99
   7   1   2   19.51    1.06
  -7   1  -2   17.50    0.98
  -7   1  -2   18.54    1.10
  -7   1  -2   18.62    1.00
  -9  -1  -2    0.35    0.41
  -9  -1  -2    0.14    0.28
   9  -1   2   -0.70    0.30
  -9   1  -2   -0.14    0.28
  -9   1  -2    0.17    0.47
   9   1   2    0.35    0.34
  -9   1  -2    0.06    0.31
   9   1   2   -0.32    0.37
 -11  -1  -2    3.50    0.81
 -11  -1  -2    3.17    0.59
 -11  -1  -2    3.57    0.56
  11  -1   2    3.22    0.75
 -11   1  -2    3.22    0.82
 -11   1  -2    2.91    0.52
 -11   1  -2    3.72    0.59
  11   1   2    3.82    0.77
 -13  -1  -2    9.81    1.32
 -13  -1  -2    6.63    0.68
  13  -1   2    7.96    1.12
 -13  -1  -2    8.56    0.81
  13   1   2    8.76    1.13
 -13   1  -2    9.30    0.81
 -13   1  -2    7.84    0.74
 -13   1  -2    9.11    1.27
 -15  -1  -2    2.82    0.53
 -15  -1  -2    0.65    0.77
  15  -1   2    1.60    0.71
 -15  -1  -2    0.48    0.55
 -15   1  -2    1.29    0.56
 -15   1  -2    1.79    0.86
  15   1   2    1.34    0.71
 -15   1  -2    1.84    0.43
  17  -1   2    1.20    0.78
 -17  -1  -2    2.67    1.02
 -17   1  -2    1.73    0.90
  17   1   2    2.10    0.85
 -16  -2   2    2.14    0.92
  16  -2  -2    2.02    0.86
 -16   2   2    3.09    0.99
  16   2  -2    2.87    0.94
  14  -2  -2   13.67    1.46
 -14  -2   2   14.92    1.59
 -14   2   2   11.36    1.45
  14   2  -2   14.34    1.52
  12  -2  -2    7.43    1.07
 -12  -2   2    7.44    1.16
  12   2  -2    7.93    1.10
 -12   2   2    8.41    1.19
 -10  -2   2   98.12    3.54
  10  -2  -2  100.77    3.47
 -10   2   2  103.99    3.63
  10   2  -2  103.73    3.53
   8  -2  -2    4.31    0.69
  -8  -2   2    3.59    0.64
  -8   2   2    4.21    0.68
   8   2  -2    4.15    0.68
  -6  -2   2    2.23    0.56
   6  -2  -2    2.42    0.28
   6  -2  -2    1.60    0.46
   6   2  -2    2.60    0.33
  -6   2   2    2.67    0.61
  -6   2   2    2.57    0.33
   6   2  -2    1.86    0.49
  -6   2   2    1.81    0.46
   6   2  -2    2.20    0.52
  -4  -2   2  182.48    4.94
   4  -2  -2  180.82    4.93
  -4  -2   2  181.25    4.79
   4  -2  -2  185.06    4.75
  -4  -2   2  188.35    5.07
   4   2  -2  187.07    4.76
   4   2  -2  176.33    4.91
  -4   2   2  180.38    4.79
  -4   2   2  184.95    5.04
   4   2  -2  184.37    5.03
  -2  -2   2  177.24    4.52
   2  -2  -2  176.19    4.67
  -2  -2   2  174.64    4.62
   2  -2  -2  171.97    4.55
   2  -2  -2  177.67    4.57
   2  -2  -2  176.69    4.60
  -2   2   2  173.25    4.63
   2   2  -2  169.05    4.50
  -2   2   2  169.81    4.66
   2   2  -2  173.77    4.69
   2   2  -2  176.50    4.60
   0  -2   2   98.44    2.80
   0  -2  -2   99.59    2.78
   0  -2   2   98.13    2.81
   0  -2  -2   99.25    2.81
   0  -2  -2   98.41    2.61
   0   2  -2   98.80    2.80
   0   2   2   96.94    2.83
   0   2  -2   98.55    2.79
   0   2   2   99.94    2.61
   0   2  -2   96.18    2.52
   0   2  -2   96.94    2.52
   0   2   2   96.83    2.77
  -2   2  -2  994.97   24.52
  -4  -2  -2   20.30    1.00
   4  -2   2   22.84    0.93
  -4  -2  -2   21.96    1.06
   4  -2   2   22.74    1.07
  -4  -2  -2   21.66    0.88
   4   2   2   21.58    1.06
  -4   2  -2   22.93    1.06
  -4   2  -2   22.05    0.94
   4   2   2   21.13    0.91
   4   2   2   20.52    1.05
  -4   2  -2   20.00    1.01
  -6  -2  -2   10.35    0.75
   6  -2   2   11.55    0.89
  -6  -2  -2   10.73    0.94
  -6  -2  -2   11.35    0.73
   6  -2   2   10.73    0.81
  -6   2  -2   10.41    0.81
  -6   2  -2   11.19    0.83
   6   2   2    9.46    0.76
   6   2   2   10.89    0.88
  -6   2  -2    9.26    0.92
   6   2   2   10.76    0.83
   8  -2   2   75.49    2.66
  -8  -2  -2   76.36    2.70
  -8  -2  -2   73.13    2.40
  -8   2  -2   73.83    2.39
   8   2   2   73.55    2.54
  -8   2  -2   74.82    2.46
   8   2   2   70.82    2.46
  -8   2  -2   79.52    2.65
 -10  -2  -2    1.66    0.45
  10  -2   2    2.75    0.67
 -10  -2  -2    1.63    0.59
 -10   2  -2    2.81    0.52
  10   2   2    3.56    0.58
  10   2   2    1.81    0.57
 -10   2  -2    3.04    0.71
 -10   2  -2    2.21    0.47
 -12  -2  -2    8.59    0.85
  12  -2   2    6.97    1.01
 -12  -2  -2    5.68    0.69
 -12  -2  -2    8.72    1.13
 -12   2  -2    7.83    0.77
 -12   2  -2    6.33    0.70
  12   2   2    6.10    0.92
 -12   2  -2    8.14    1.19
 -14  -2  -2    2.10    0.55
  14  -2   2    1.59    0.70
 -14  -2  -2    3.62    1.02
 -14   2  -2    3.00    0.52
 -14   2  -2    2.34    0.85
  14   2   2    3.35    0.83
 -14   2  -2    1.71    0.46
  16  -2   2    1.53    0.80
 -16  -2  -2    1.36    0.83
 -16   2  -2    2.70    0.94
  16   2   2    1.66    0.76
  17  -3  -2    2.72    0.95
 -17  -3   2    1.09    0.84
 -17   3   2    1.61    0.92
  17   3  -2    1.98    0.85
 -15  -3   2    2.64    1.30
  15  -3  -2    3.81    1.00
 -15   3   2    3.10    1.04
  13  -3  -2    0.32    0.58
 -13  -3   2    0.98    0.68
 -13   3   2    0.53    0.74
  13   3  -2    0.36    0.60
 -11  -3   2   18.31    1.45
  11  -3  -2   19.11    1.40
  11   3  -2   19.87    1.43
 -11   3   2   19.26    1.51
  -9  -3   2   25.26    1.44
   9  -3  -2   23.40    1.35
  -9   3   2   25.40    1.50
   9   3  -2   23.70    1.39
   7  -3  -2   67.14    2.35
  -7  -3   2   64.64    1.95
  -7  -3   2   70.39    2.41
  -7   3   2   67.25    1.90
   7   3  -2   66.94    1.90
   7   3  -2   66.09    2.41
  -7   3   2   67.45    2.48
   5  -3  -2   14.63    0.65
  -5  -3   2   13.73    0.72
  -5  -3   2   13.34    0.90
   5  -3  -2   13.67    0.94
   5  -3  -2   14.53    0.87
  -5   3   2   13.94    0.84
   5   3  -2   14.17    0.91
   5   3  -2   13.77    0.70
  -5   3   2   13.32    1.02
   5   3  -2   14.09    0.98
  -5   3   2   14.06    0.71
   5   3  -2   12.32    0.91
  -3  -3   2    5.28    0.48
  -3  -3   2    5.16    0.49
   3  -3  -2    5.25    0.42
   3  -3  -2    4.32    0.51
   3  -3  -2    6.26    0.53
  -3  -3   2    3.16    0.45
   3   3  -2    4.82    0.56
   3   3  -2    4.48    0.45
   3   3  -2    4.37    0.43
  -3   3   2    5.28    0.50
  -3   3   2    4.00    0.53
   1  -3  -2   13.37    0.55
   1  -3  -2   13.57    0.56
  -1  -3   2   12.74    0.69
   1  -3  -2   14.49    0.75
   1  -3  -2   13.43    0.69
  -1  -3   2   13.76    0.52
  -1  -3   2   13.38    0.82
   1  -3  -2   12.39    0.81
  -1   3   2   14.19    0.74
   1   3  -2   13.89    0.70
   1   3  -2   14.00    0.74
   1   3  -2   12.87    0.50
  -1  -3  -2  380.74    9.62
   1  -3   2  376.78    9.61
  -1  -3  -2  376.55    9.27
   1  -3   2  392.75    9.81
  -1  -3  -2  373.25    9.60
   1   3   2  372.70    9.58
   1   3   2  375.71    9.28
  -1   3  -2  372.88    9.58
  -1   3  -2  373.96    9.61
   1   3   2  370.73    9.65
   3  -3   2   98.39    2.88
  -3  -3  -2   96.25    2.58
   3  -3   2   94.42    2.84
  -3  -3  -2   94.37    2.85
  -3  -3  -2   97.20    2.85
   3  -3   2   95.21    2.58
   3   3   2   98.01    2.61
  -3   3  -2   96.03    2.83
  -3   3  -2   94.26    2.87
  -3   3  -2   94.70    2.58
   3   3   2   95.73    2.86
   3   3   2   93.19    2.87
   5  -3   2   16.33    1.03
  -5  -3  -2   15.33    1.02
  -5  -3  -2   14.82    0.78
  -5  -3  -2   14.39    0.88
   5  -3   2   16.43    0.87
   5   3   2   15.64    1.03
  -5   3  -2   15.83    0.94
   5   3   2   16.12    0.99
  -5   3  -2   14.93    0.92
  -7  -3  -2   15.44    0.86
   7  -3   2   15.16    1.05
  -7  -3  -2   15.83    0.88
   7  -3   2   16.18    0.97
  -7  -3  -2   14.51    1.07
   7   3   2   15.27    0.92
  -7   3  -2   16.50    1.00
  -7   3  -2   15.49    0.91
   7   3   2   16.22    0.98
  -7   3  -2   14.30    0.92
  -9  -3  -2   -0.18    0.42
  -9  -3  -2   -0.16    0.28
   9  -3   2    0.45    0.46
   9   3   2    0.14    0.36
  -9   3  -2   -0.15    0.31
   9   3   2   -0.13    0.35
  -9   3  -2   -0.31    0.41
  -9   3  -2   -0.51    0.27
 -11  -3  -2    1.74    0.71
  11  -3   2    1.93    0.68
 -11   3  -2    1.35    0.47
 -11   3  -2    1.26    0.69
  11   3   2    1.82    0.60
  11   3   2    1.67    0.50
 -11   3  -2    1.45    0.45
  13  -3   2    3.28    0.86
 -13  -3  -2    5.26    1.06
 -13   3  -2    2.96    0.53
 -13   3  -2    2.74    0.53
 -13   3  -2    2.57    0.81
  13   3   2    3.78    0.82
  15  -3   2   -0.35    0.67
 -15  -3  -2    0.79    0.86
 -15  -3  -2    1.91    0.48
 -15   3  -2    1.36    0.41
 -15   3  -2    1.31    0.80
  15   3   2    0.67    0.67
  17  -3   2   -0.83    0.62
 -17  -3  -2    0.44    0.86
  17   3   2    0.42    0.70
 -17   3  -2   -0.31    0.72
  16  -4  -2    0.54    0.75
 -16  -4   2    2.49    0.93
 -16   4   2    0.14    0.79
  16   4  -2    0.89    0.73
 -14  -4   2   14.02    1.56
  14  -4  -2   14.47    1.53
 -14   4   2   12.27    1.50
  14   4  -2   14.42    1.56
  12  -4  -2   21.14    1.51
 -12  -4   2   18.96    1.52
 -12   4   2   18.65    1.60
  12   4  -2   20.21    1.48
  10  -4  -2    3.13    0.68
 -10  -4   2    1.91    0.64
  10   4  -2    2.96    0.66
 -10   4   2    2.24    0.72
  -8  -4   2   53.28    1.70
   8  -4  -2   57.44    2.17
   8  -4  -2   56.21    1.57
  -8  -4   2   57.48    2.21
   8   4  -2   55.99    1.67
   8   4  -2   54.22    2.20
  -8   4   2   55.48    2.26
   6  -4  -2   30.98    1.33
  -6  -4   2   30.08    1.39
   6  -4  -2   27.93    0.99
  -6  -4   2   28.69    1.11
   6   4  -2   30.34    1.41
   6   4  -2   30.30    1.09
  -6   4   2   28.80    1.32
  -6   4   2   29.71    1.10
  -6   4   2   30.23    1.49
   6   4  -2   28.24    1.33
   4  -4  -2  368.88    9.69
   4  -4  -2  367.50    9.37
   4  -4  -2  373.99    9.51
  -4  -4   2  373.39    9.45
  -4  -4   2  375.34    9.53
  -4  -4   2  369.99    9.70
   4   4  -2  375.82    9.70
  -4   4   2  369.01    9.45
   4   4  -2  366.00    9.50
  -4   4   2  360.29    9.50
   4   4  -2  398.96    9.60
  -4   4   2  371.79    9.71
   2  -4  -2    0.11    0.16
  -2  -4   2    0.19    0.19
  -2  -4   2    0.33    0.30
   2  -4  -2   -0.19    0.24
   2  -4  -2    0.51    0.22
  -2  -4   2    0.07    0.22
   2   4  -2    0.32    0.26
   2   4  -2    0.37    0.19
  -2   4   2   -0.05    0.25
   2   4  -2    0.13    0.29
  -2   4   2    0.44    0.32
   0  -4  -2    3.31    0.42
   0  -4  -2    3.09    0.21
   0  -4   2    2.04    0.35
   0  -4  -2    3.31    0.48
   0  -4  -2    3.10    0.23
   0  -4   2    3.02    0.44
   0   4  -2    2.73    0.41
   0   4   2    3.34    0.47
   0   4  -2    2.77    0.40
   0   4   2    3.11    0.42
  -2  -4  -2   84.58    2.19
  -2  -4  -2   86.68    2.63
   2  -4   2   84.49    2.57
   2  -4   2   81.46    2.59
  -2  -4  -2   85.44    2.57
  -2   4  -2   85.04    2.56
   2   4   2   83.85    2.61
   2   4   2   86.64    2.21
   2   4   2   83.27    2.59
  -2   4  -2   83.26    2.71
  -4  -4  -2    7.10    0.49
   4  -4   2    7.92    0.73
  -4  -4  -2    8.31    0.73
  -4  -4  -2    8.19    0.82
   4  -4   2    8.41    0.59
   4  -4   2    7.78    0.79
   4   4   2    8.14    0.79
  -4   4  -2    7.68    0.60
   4   4   2    9.05    0.84
   4   4   2    8.25    0.55
  -4   4  -2    8.67    0.75
  -4   4  -2    7.97    0.75
  -6  -4  -2   61.26    1.99
   6  -4   2   62.44    2.28
  -6  -4  -2   62.09    2.29
   6  -4   2   62.99    2.21
  -6  -4  -2   59.82    2.08
  -6   4  -2   58.93    2.08
   6   4   2   66.17    2.05
  -6   4  -2   63.74    2.19
  -6   4  -2   62.26    2.07
   6   4   2   64.87    2.21
  -8  -4  -2  103.17    3.45
  -8  -4  -2  101.21    3.11
   8  -4   2  108.33    3.48
   8   4   2  104.03    3.28
  -8   4  -2  104.93    3.28
   8   4   2  103.67    3.20
  -8   4  -2   99.26    3.18
  -8   4  -2  103.13    3.12
  10  -4   2    0.38    0.50
 -10  -4  -2    0.59    0.55
  10   4   2    0.18    0.42
 -10   4  -2   -0.18    0.45
  10   4   2   -0.12    0.36
 -10   4  -2    0.36    0.37
 -10   4  -2    0.18    0.35
 -12  -4  -2    2.44    0.79
  12  -4   2    2.79    0.81
 -12   4  -2    3.19    0.85
  12   4   2    2.53    0.61
  12   4   2    2.00    0.64
 -12   4  -2    2.48    0.55
 -12   4  -2    3.04    0.84
  14  -4   2    0.18    0.62
 -14  -4  -2    0.48    0.76
 -14   4  -2    1.44    0.81
 -14   4  -2    1.15    0.43
 -14   4  -2    0.70    0.50
  14   4   2    0.26    0.57
 -16  -4  -2   -0.30    0.73
  16  -4   2   -0.10    0.64
 -16  -4  -2    0.92    0.44
 -16   4  -2    1.08    0.84
  16   4   2    0.61    0.76
 -17  -5   2    4.64    1.16
  17  -5  -2    5.92    1.23
 -17   5   2    7.05    1.33
  17   5  -2    5.99    1.24
 -15  -5   2    1.39    0.74
  15  -5  -2    0.26    0.68
  15   5  -2    0.06    0.63
 -15   5   2    1.63    0.88
  13  -5  -2    2.13    0.74
 -13  -5   2    3.04    0.88
 -13   5   2    5.02    1.05
  13   5  -2    4.44    0.97
 -11  -5   2    0.92    0.60
  11  -5  -2    1.23    0.62
  11   5  -2    0.94    0.61
 -11   5   2    1.59    0.73
  -9  -5   2    6.31    0.54
  -9  -5   2    5.87    0.85
   9  -5  -2    6.37    0.86
   9   5  -2    7.40    1.05
  -9   5   2    7.34    1.07
   9   5  -2    7.09    0.63
   7  -5  -2    5.15    0.69
  -7  -5   2    6.30    0.77
  -7  -5   2    6.14    0.55
   7  -5  -2    5.77    0.42
   7   5  -2    6.47    0.55
  -7   5   2    5.91    0.52
   7   5  -2    5.11    0.72
  -7   5   2    5.19    0.79
  -5  -5   2   35.69    1.60
  -5  -5   2   37.72    1.38
   5  -5  -2   40.10    1.51
   5  -5  -2   37.95    1.30
  -5  -5   2   39.91    1.55
  -5   5   2   39.31    1.41
   5   5  -2   37.42    1.49
  -5   5   2   38.10    1.70
  -5   5   2   37.73    1.48
   5   5  -2   39.30    1.37
   3  -5  -2   14.79    0.95
  -3  -5   2   15.36    0.82
  -3  -5   2   16.25    0.95
  -3  -5   2   15.13    0.79
   3  -5  -2   14.88    0.77
   3  -5  -2   16.18    0.75
   3   5  -2   15.30    0.84
  -3   5   2   16.28    0.77
   3   5  -2   15.54    0.78
   3   5  -2   15.66    0.94
  -3   5   2   16.03    0.87
  -3   5   2   14.98    0.99
   1  -5  -2    0.26    0.15
  -1  -5   2    0.35    0.16
   1  -5  -2   -0.11    0.21
  -1  -5   2    0.36    0.27
   1  -5  -2    0.08    0.15
   1  -5  -2   -0.23    0.28
  -1  -5   2    0.01    0.29
  -1   5   2    0.07    0.26
   1   5  -2   -0.04    0.27
   1   5  -2    0.15    0.15
  -1  -5  -2   14.09    0.87
  -1  -5  -2   14.26    0.89
   1  -5   2   13.44    0.82
   1  -5   2   13.29    0.89
   1   5   2   11.74    0.78
  -1   5  -2   13.46    0.91
  -1   5  -2   13.72    0.80
   3  -5   2   10.38    0.77
   3  -5   2   10.09    0.84
  -3  -5  -2   10.84    0.93
  -3  -5  -2    8.85    0.44
  -3  -5  -2   10.34    0.74
   3  -5   2    9.88    0.52
   3   5   2   10.54    0.86
  -3   5  -2    9.61    0.53
  -3   5  -2    8.66    0.75
   3   5   2   10.32    0.48
  -3   5  -2   10.08    0.76
   3   5   2    9.77    0.85
   5  -5   2    0.56    0.36
   5  -5   2    0.01    0.30
  -5  -5  -2    0.17    0.30
  -5  -5  -2    0.52    0.46
  -5  -5  -2    0.26    0.23
   5  -5   2    0.03    0.39
  -5   5  -2    0.39    0.34
   5   5   2    0.20    0.27
  -5   5  -2   -0.16    0.36
   5   5   2   -0.30    0.36
  -7  -5  -2   25.76    1.43
   7  -5   2   26.21    1.40
  -7  -5  -2   27.25    1.34
   7  -5   2   25.17    1.19
  -7  -5  -2   24.46    1.11
  -7   5  -2   25.17    1.23
  -7   5  -2   25.64    1.18
   7   5   2   27.95    1.32
   7   5   2   27.44    1.18
   9  -5   2    1.03    0.53
  -9  -5  -2   -0.14    0.43
   9   5   2    0.68    0.41
  -9   5  -2    1.62    0.56
   9   5   2    0.75    0.42
  -9   5  -2    0.68    0.44
  -9   5  -2    0.58    0.42
  11  -5   2   13.16    1.38
 -11  -5  -2   12.91    1.37
 -11   5  -2   14.48    1.24
  11   5   2   13.97    1.08
 -11   5  -2   13.66    0.95
  11   5   2   11.26    1.28
  13  -5   2    2.93    0.83
 -13  -5  -2    1.81    0.80
 -13   5  -2    3.42    0.89
  13   5   2    1.90    0.64
  13   5   2    3.56    0.66
 -13   5  -2    2.84    0.55
  15  -5   2   -0.55    0.62
 -15  -5  -2   -0.12    0.77
  15   5   2   -0.47    0.48
 -15   5  -2    0.13    0.69
 -15   5  -2   -0.07    0.39
 -16  -6   2   -0.21    0.69
  16  -6  -2   -0.12    0.66
 -16   6   2    0.52    0.75
  16   6  -2    0.72    0.73
  14  -6  -2    4.96    0.99
 -14  -6   2    3.29    0.96
 -14   6   2    3.07    0.93
  14   6  -2    4.89    0.99
 -12  -6   2   11.57    1.35
  12  -6  -2   10.92    1.27
 -12   6   2   11.52    1.36
  12   6  -2   11.13    1.26
 -10  -6   2   -0.17    0.51
  10  -6  -2    1.18    0.53
 -10  -6   2    0.71    0.31
 -10   6   2   -0.01    0.52
  10   6  -2    0.28    0.29
  10   6  -2   -0.42    0.44
  -8  -6   2   37.42    1.45
   8  -6  -2   41.06    1.76
   8  -6  -2   38.34    1.31
  -8  -6   2   39.17    1.80
   8   6  -2   40.63    1.42
   8   6  -2   38.60    1.81
  -8   6   2   41.69    1.41
  -8   6   2   43.07    1.96
   6  -6  -2   15.61    0.93
  -6  -6   2   15.11    0.98
   6  -6  -2   13.33    0.70
  -6   6   2   14.85    0.81
   6   6  -2   15.83    0.81
  -6   6   2   14.77    1.10
   6   6  -2   14.28    0.95
  -6   6   2   14.98    1.03
   4  -6  -2  229.09    5.97
  -4  -6   2  231.82    6.01
  -4  -6   2  223.16    6.01
  -4  -6   2  228.78    6.24
   4  -6  -2  226.67    5.93
   4   6  -2  216.94    6.19
   4   6  -2  226.29    5.97
   4   6  -2  220.45    5.99
  -4   6   2  225.57    5.99
  -4   6   2  228.21    6.26
  -4   6   2  230.28    6.04
   2  -6  -2   57.95    1.66
   2  -6  -2   54.89    2.04
   2  -6  -2   58.73    2.41
  -2  -6   2   55.26    1.99
  -2  -6   2   55.52    1.68
   2  -6  -2   57.65    2.01
  -2  -6   2   55.82    1.89
  -2   6   2   57.48    1.94
  -2   6   2   56.01    1.66
   2   6  -2   54.30    1.87
   2   6  -2   54.47    1.67
   2   6  -2   55.89    1.99
   0  -6   2   59.97    1.99
   0  -6  -2   56.73    2.07
   0  -6   2   59.29    2.06
   0  -6  -2   59.64    1.95
   0   6   2   58.99    2.03
   0   6  -2   60.26    1.98
   0   6  -2   59.71    2.02
   0   6   2   57.18    2.06
  -2  -6  -2   24.51    1.30
   2  -6   2   26.02    1.20
   2  -6   2   24.34    1.22
  -2  -6  -2   27.60    1.18
   2   6   2   25.04    1.26
  -2   6  -2   25.12    1.21
  -2   6  -2   25.14    1.20
   2   6   2   24.93    1.23
  -4  -6  -2   24.68    0.88
   4  -6   2   23.86    1.19
   4  -6   2   24.88    1.31
  -4  -6  -2   24.59    1.17
  -4  -6  -2   23.42    1.31
   4  -6   2   25.06    0.95
   4   6   2   26.99    1.28
   4   6   2   26.06    0.90
  -4   6  -2   24.49    0.97
  -4   6  -2   24.39    1.21
   6  -6   2    3.61    0.64
   6  -6   2    3.44    0.55
   6  -6   2    4.15    0.51
  -6  -6  -2    3.27    0.44
  -6  -6  -2    3.48    0.65
   6   6   2    3.34    0.58
   6   6   2    3.36    0.47
  -6   6  -2    4.08    0.58
  -6   6  -2    3.92    0.52
  -8  -6  -2    7.71    1.00
  -8  -6  -2    8.40    0.67
   8  -6   2    7.22    1.00
   8   6   2    9.29    0.77
  -8   6  -2    8.99    0.83
   8   6   2    9.49    0.96
  -8   6  -2    8.58    0.86
 -10  -6  -2   19.53    1.52
  10  -6   2   20.33    1.45
  10   6   2   19.31    1.22
 -10   6  -2   21.75    1.38
  10   6   2   18.76    1.24
 -10   6  -2   21.20    1.14
  12  -6   2    0.45    0.62
 -12  -6  -2    2.22    0.80
 -12   6  -2    1.90    0.52
  12   6   2    2.10    0.64
 -12   6  -2    1.93    0.74
  12   6   2    2.20    0.62
 -14  -6  -2   -0.69    0.71
 -14   6  -2    1.04    0.75
  14   6   2    0.17    0.48
  14   6   2    0.37    0.52
 -14   6  -2    0.60    0.45
  16  -6   2   -0.52    0.60
 -16  -6  -2    1.00    0.86
 -16   6  -2    0.07    0.39
 -16   6  -2    1.36    0.81
 -15  -7   2    0.52    0.65
  15  -7  -2    0.23    0.69
 -15   7   2   -0.46    0.68
  15   7  -2    0.13    0.62
  13  -7  -2   -0.39    0.52
 -13  -7   2    1.41    0.70
  13   7  -2   -0.27    0.57
 -13   7   2    0.26    0.69
 -11  -7   2    1.31    0.44
 -11  -7   2    1.14    0.68
  11  -7  -2    1.81    0.65
  11   7  -2    2.02    0.70
 -11   7   2    3.16    0.88
  11   7  -2    1.06    0.38
  -9  -7   2    0.88    0.51
   9  -7  -2    1.09    0.29
   9  -7  -2    0.82    0.57
  -9  -7   2    0.77    0.31
   9   7  -2    0.75    0.52
  -9   7   2    0.24    0.54
  -9   7   2    1.43    0.49
   9   7  -2    0.86    0.35
   7  -7  -2    0.70    0.27
   7  -7  -2    0.93    0.40
  -7  -7   2    0.59    0.28
  -7  -7   2    0.52    0.43
  -7   7   2    0.77    0.33
  -7   7   2    0.67    0.50
   7   7  -2    0.11    0.30
   7   7  -2    0.55    0.44
  -5  -7   2    5.89    0.61
   5  -7  -2    6.72    0.67
  -5  -7   2    6.44    0.70
   5  -7  -2    6.47    0.54
  -5  -7   2    6.86    0.79
   5   7  -2    6.65    0.65
  -5   7   2    6.58    0.83
  -5   7   2    6.27    0.65
  -5   7   2    8.01    0.73
   5   7  -2    6.04    0.65
   3  -7  -2   27.23    1.03
  -3  -7   2   25.51    1.08
  -3  -7   2   25.68    1.17
  -3  -7   2   26.23    1.29
   3  -7  -2   26.86    1.12
   3   7  -2   24.92    1.27
  -3   7   2   27.13    1.22
   3   7  -2   24.65    1.07
   3   7  -2   27.03    1.20
  -3   7   2   26.05    1.04
  -1  -7   2    1.84    0.31
   1  -7  -2    2.28    0.56
   1  -7  -2    1.23    0.53
   1  -7  -2    1.74    0.26
  -1  -7   2    2.47    0.54
  -1  -7   2    1.42    0.43
   1  -7  -2    1.13    0.38
  -1   7   2    1.20    0.43
   1   7  -2    1.41    0.48
  -1   7   2    1.71    0.26
   1   7  -2    2.59    0.53
   1   7  -2    1.50    0.31
   1  -7   2   44.01    1.70
  -1  -7  -2   44.77    1.84
  -1  -7  -2   46.50    1.68
   1  -7   2   45.95    1.80
  -1   7  -2   45.28    1.71
   1   7   2   49.37    1.87
   1   7   2   44.63    1.77
  -1   7  -2   45.38    1.75
   3  -7   2    0.61    0.39
  -3  -7  -2    0.57    0.49
   3  -7   2    0.45    0.47
   3  -7   2    0.20    0.24
   3   7   2    0.47    0.41
  -3   7  -2    0.70    0.28
  -3   7  -2    0.21    0.39
  -5  -7  -2    4.16    0.68
   5  -7   2    5.02    0.51
   5  -7   2    5.91    0.79
  -5  -7  -2    5.06    0.46
  -5   7  -2    4.54    0.60
   5   7   2    5.09    0.68
  -5   7  -2    4.03    0.57
   5   7   2    4.63    0.46
   7  -7   2    0.00    0.40
  -7  -7  -2    0.25    0.43
   7  -7   2    0.32    0.33
  -7  -7  -2   -0.13    0.22
  -7   7  -2    0.37    0.35
   7   7   2    0.24    0.29
  -7   7  -2    0.04    0.35
   7   7   2   -0.02    0.34
  -9  -7  -2   11.41    1.25
   9  -7   2   10.27    1.20
   9   7   2   10.03    0.85
  -9   7  -2    9.67    0.87
  -9   7  -2    9.33    0.97
   9   7   2    9.67    1.00
 -11  -7  -2   -1.31    0.48
  11  -7   2    0.80    0.66
  11   7   2    0.57    0.50
 -11   7  -2    0.23    0.45
 -11   7  -2   -0.20    0.54
  11   7   2    0.47    0.47
 -13  -7  -2    0.33    0.70
  13  -7   2    1.53    0.71
  13   7   2    0.81    0.55
  13   7   2    1.03    0.55
 -13   7  -2    3.31    0.87
 -13   7  -2    1.03    0.47
 -15  -7  -2    2.11    0.93
  15  -7   2    2.07    0.86
  15   7   2    3.42    0.70
  15   7   2    1.60    0.69
 -15   7  -2    1.56    0.51
 -15   7  -2    4.99    1.12
 -16  -8   2    1.85    0.89
  16  -8  -2    0.09    0.79
  16   8  -2    1.08    0.78
 -16   8   2    0.85    0.83
  14  -8  -2    0.96    0.82
 -14  -8   2   -0.44    0.58
 -14   8   2    0.67    1.02
  14   8  -2    0.08    0.61
 -12  -8   2    9.78    1.29
 -12  -8   2   10.79    0.75
  12  -8  -2   11.50    1.30
  12   8  -2   11.51    1.33
  12   8  -2   12.19    0.85
 -12   8   2    9.47    1.41
 -10  -8   2    1.24    0.36
 -10  -8   2    1.40    0.67
  10  -8  -2    1.24    0.59
  10  -8  -2    1.15    0.34
 -10   8   2    1.55    0.79
  10   8  -2    0.19    0.54
  10   8  -2    0.91    0.42
 -10   8   2    1.44    0.40
   8  -8  -2    7.66    0.61
  -8  -8   2    8.28    0.74
   8  -8  -2    7.88    0.90
  -8  -8   2    7.35    0.93
  -8   8   2    7.49    1.01
   8   8  -2    7.85    0.94
  -8   8   2    7.85    0.71
   8   8  -2    9.56    0.76
  -6  -8   2    0.07    0.28
   6  -8  -2    0.05    0.22
  -6  -8   2   -0.79    0.30
   6  -8  -2   -0.13    0.29
  -6  -8   2    0.20    0.36
  -6   8   2    0.47    0.33
   6   8  -2   -0.16    0.29
  -6   8   2    0.45    0.44
  -4  -8   2    1.98    0.51
  -4  -8   2    2.85    0.48
  -4  -8   2    1.80    0.48
   4  -8  -2    2.50    0.42
   4  -8  -2    2.05    0.40
  -4   8   2    2.44    0.43
  -4   8   2    2.36    0.51
   4   8  -2    2.12    0.49
   4   8  -2    3.06    0.52
  -4   8   2    3.33    0.67
   2  -8  -2   15.11    1.10
   2  -8  -2   14.30    0.84
  -2  -8   2   14.78    0.98
   2  -8  -2   14.66    0.68
  -2  -8   2   14.93    0.77
  -2   8   2   14.53    0.96
   2   8  -2   12.86    0.91
   2   8  -2   16.11    1.04
   2   8  -2   14.97    0.79
  -2   8   2   15.19    0.69
   0  -8   2  109.91    2.88
   0  -8   2  104.21    3.37
   0  -8  -2  110.50    3.47
   0   8  -2  111.36    3.30
   0   8  -2  110.77    2.89
   0   8  -2  105.79    3.33
   0   8   2  110.07    3.37
   2  -8   2   51.22    2.01
  -2  -8  -2   54.06    2.10
   2   8   2   51.52    2.00
  -2   8  -2   50.74    1.89
  -4  -8  -2    9.43    0.93
   4  -8   2    9.36    0.95
   4  -8   2    8.30    0.56
  -4   8  -2    8.38    0.61
  -4   8  -2    7.84    0.79
   4   8   2    9.56    0.47
   4   8   2    8.61    0.89
  -6  -8  -2    0.50    0.46
   6  -8   2   -0.04    0.39
  -6   8  -2    0.44    0.39
   6   8   2    0.13    0.36
  -6   8  -2    0.19    0.33
   6   8   2    0.17    0.24
  -8  -8  -2   12.65    1.29
   8  -8   2   11.99    1.23
  -8   8  -2   11.91    0.93
   8   8   2   11.44    0.85
  -8   8  -2   13.03    0.99
   8   8   2   13.65    1.08
  10  -8   2    2.46    0.76
 -10  -8  -2    3.56    0.86
  10   8   2    3.85    0.65
 -10   8  -2    3.58    0.77
  10   8   2    3.85    0.75
 -10   8  -2    3.46    0.65
 -12  -8  -2    0.66    0.68
  12  -8   2    0.49    0.64
  12   8   2    0.97    0.56
 -12   8  -2    0.43    0.45
  12   8   2    0.17    0.53
 -12   8  -2    0.27    0.65
 -14  -8  -2    0.22    0.70
  14  -8   2    0.00    0.57
  14   8   2   -0.79    0.38
 -14   8  -2    0.12    0.46
 -14   8  -2   -0.61    0.62
 -16  -8  -2    1.00    0.82
  16  -8   2   -0.15    0.74
 -16   8  -2    3.72    1.04
 -16   8  -2   -0.30    0.41
  16   8   2    0.69    0.69
 -15  -9   2    0.30    0.66
  15  -9  -2    1.01    0.80
 -15   9   2    1.69    0.89
  15   9  -2   -0.63    0.59
 -13  -9   2    2.18    0.77
  13  -9  -2    2.61    0.82
 -13  -9   2    3.11    0.51
 -13   9   2    2.34    0.86
  13   9  -2    3.00    0.86
  13   9  -2    2.00    0.50
 -11  -9   2    6.18    1.05
  11  -9  -2   10.67    1.16
  11   9  -2    9.24    1.19
  11   9  -2    7.96    0.80
 -11   9   2    8.96    0.79
 -11   9   2    7.40    1.18
   9  -9  -2   -0.22    0.26
  -9  -9   2    1.08    0.57
   9  -9  -2   -0.26    0.42
   9   9  -2    0.17    0.39
   9   9  -2    0.75    0.54
  -9   9   2    0.17    0.38
  -9   9   2   -0.46    0.56
  -7  -9   2   11.78    1.07
   7  -9  -2   11.22    0.73
   7  -9  -2   11.47    0.91
  -7   9   2   12.19    0.87
   7   9  -2   10.24    0.84
  -5  -9   2    2.40    0.51
  -5  -9   2    0.62    0.37
   5  -9  -2    1.85    0.43
  -5   9   2    1.25    0.55
  -5   9   2    1.91    0.45
   5   9  -2    1.79    0.45
   5   9  -2    1.46    0.42
  -5   9   2    2.05    0.45
  -3  -9   2    1.85    0.49
  -3  -9   2    1.29    0.38
   3  -9  -2    2.35    0.59
  -3   9   2    1.61    0.47
   3   9  -2    1.75    0.42
   3   9  -2    1.62    0.45
  -3   9   2    1.67    0.36
   1  -9  -2    9.31    0.49
   1  -9  -2    9.17    0.96
  -1  -9   2   10.27    0.87
  -1  -9   2    8.90    0.59
  -1   9   2    9.27    0.48
  -1   9   2    9.83    0.90
   1   9  -2    7.86    0.60
   1   9  -2   10.60    0.91
   1  -9   2   90.79    3.05
  -1  -9  -2   96.25    3.13
   1  -9   2   92.17    2.54
   1   9   2   95.40    3.06
  -1   9  -2   92.64    2.95
   3  -9   2   26.69    1.40
   3  -9   2   28.25    1.01
  -3  -9  -2   28.37    1.50
   3  -9   2   29.51    1.06
   3   9   2   26.96    1.41
  -3   9  -2   27.91    1.33
   5  -9   2    0.05    0.27
   5  -9   2   -0.17    0.39
  -5  -9  -2    0.53    0.47
  -5   9  -2   -0.47    0.29
   5   9   2    0.12    0.20
  -5   9  -2    0.16    0.37
   5   9   2    0.20    0.34
   7  -9   2    0.09    0.31
  -7  -9  -2    0.29    0.48
   7  -9   2   -0.04    0.43
  -7   9  -2   -0.15    0.39
  -7   9  -2    0.30    0.43
   7   9   2   -0.47    0.24
   7   9   2    0.27    0.39
   9  -9   2    4.28    0.89
  -9  -9  -2    4.84    0.96
  -9   9  -2    4.25    0.70
  -9   9  -2    3.29    0.68
   9   9   2    4.39    0.66
   9   9   2    5.20    0.84
  11  -9   2    0.05    0.61
 -11  -9  -2   -0.77    0.52
 -11   9  -2   -0.73    0.52
  11   9   2    1.08    0.49
 -11   9  -2   -0.16    0.46
  13   9   2    0.31    0.54
 -13   9  -2   -0.62    0.61
  13   9   2    0.64    0.50
 -13   9  -2   -0.31    0.44
  15  -9   2    2.17    0.86
 -15  -9  -2    3.48    1.07
  15   9   2    2.89    0.76
 -15   9  -2    3.34    1.05
  15   9   2    2.58    0.74
 -15   9  -2    1.93    0.57
 -14 -10   2    0.55    0.61
  14 -10  -2    0.05    0.66
 -14  10   2    1.00    0.86
  14  10  -2   -0.58    0.34
  12 -10  -2    2.09    0.39
  12 -10  -2    1.84    0.73
 -12 -10   2    0.21    0.61
 -12  10   2    0.97    0.84
 -12  10   2    1.99    0.50
  12  10  -2    1.42    0.75
  12  10  -2    2.02    0.57
  10 -10  -2    1.46    0.42
 -10 -10   2    1.29    0.67
  10 -10  -2    1.32    0.63
  10  10  -2    1.66    0.53
 -10  10   2    1.83    0.51
  10  10  -2    0.29    0.56
 -10  10   2    2.11    0.83
   8 -10  -2    2.31    0.64
  -8 -10   2    1.66    0.58
  -8  10   2    1.67    0.49
  -8  10   2    2.83    0.79
   8  10  -2    2.40    0.67
   8  10  -2    2.45    0.56
  -6 -10   2   57.67    2.24
   6 -10  -2   53.91    2.02
  -6 -10   2   55.13    2.12
   6  10  -2   52.48    2.01
  -6  10   2   57.82    2.10
  -6  10   2   53.11    2.33
  -4 -10   2    1.71    0.50
   4 -10  -2    2.30    0.62
  -4 -10   2    3.45    0.54
   4 -10  -2    2.87    0.45
  -4  10   2    3.02    0.53
   4  10  -2    2.59    0.49
   4  10  -2    2.13    0.50
  -4  10   2    3.38    0.50
   2 -10  -2    0.32    0.26
   2 -10  -2    0.40    0.48
  -2 -10   2    0.53    0.38
   2  10  -2    0.29    0.35
  -2  10   2    0.84    0.27
  -2  10   2    0.26    0.35
   2  10  -2    0.42    0.34
   0 -10   2    0.21    0.26
   0 -10  -2   -0.38    0.43
   0 -10   2    0.84    0.43
   0  10  -2    0.72    0.41
   0  10   2    0.18    0.35
   2 -10   2  121.40    3.23
   2 -10   2  118.14    3.20
   2 -10   2  120.06    3.76
  -2 -10  -2  116.48    3.81
   2  10   2  116.31    3.72
  -2  10  -2  115.97    3.61
   4 -10   2    4.31    0.50
  -4 -10  -2    4.17    0.71
   4 -10   2    5.32    0.51
   4 -10   2    4.77    0.73
  -4  10  -2    3.67    0.61
   4  10   2    4.00    0.68
   6 -10   2    6.70    1.11
   6 -10   2    7.10    0.69
  -6 -10  -2    4.79    0.85
   6  10   2    6.65    0.55
   6  10   2    7.33    0.56
  -6  10  -2    7.04    0.80
   6  10   2    5.48    0.80
  -6  10  -2    7.00    0.71
   8 -10   2    1.08    0.65
  -8 -10  -2    2.03    0.70
   8  10   2    2.15    0.49
   8  10   2    2.69    0.49
  -8  10  -2    2.65    0.66
   8  10   2    2.33    0.73
  -8  10  -2    3.19    0.66
  10 -10   2    9.78    1.27
 -10 -10  -2   11.67    1.35
 -10  10  -2   10.27    1.03
 -10  10  -2   13.68    1.25
  10  10   2   12.89    1.29
  10  10   2   11.44    0.95
 -12 -10  -2    0.01    0.71
  12 -10   2    0.28    0.66
  12  10   2    0.86    0.53
 -12  10  -2   -0.96    0.54
  12  10   2   -0.09    0.56
 -12  10  -2    0.43    0.53
 -14 -10  -2    2.89    0.95
  14 -10   2    1.46    0.87
 -14  10  -2    3.87    0.98
  14  10   2    3.28    0.75
  14  10   2    3.48    0.85
 -14  10  -2    2.90    0.64
  15 -11  -2    1.79    0.84
 -15 -11   2    2.36    0.95
 -15  11   2    3.99    1.19
  15  11  -2    3.39    0.66
  15  11  -2    3.23    0.97
 -13 -11   2    0.46    0.65
  13 -11  -2   -0.23    0.59
  13  11  -2    0.35    0.46
 -13  11   2    0.05    0.37
  13  11  -2   -0.07    0.58
 -13  11   2   -0.90    1.11
  11 -11  -2    3.47    0.84
 -11 -11   2    6.77    1.06
  11  11  -2    6.19    1.05
  11  11  -2    5.76    0.81
 -11  11   2    4.61    0.69
 -11  11   2    4.92    1.05
  -9 -11   2    0.39    0.53
   9 -11  -2   -0.04    0.49
   9  11  -2    0.22    0.43
   9  11  -2    0.84    0.59
  -9  11   2    0.08    0.41
  -9  11   2    0.21    0.62
   7 -11  -2    0.22    0.45
  -7 -11   2    0.65    0.48
  -7  11   2    0.17    0.42
  -7  11   2    0.15    0.62
   7  11  -2    0.86    0.44
   5 -11  -2   17.35    0.97
  -5 -11   2   15.17    1.10
   5 -11  -2   17.17    1.28
  -5 -11   2   14.97    1.02
  -5  11   2   14.05    0.94
   5  11  -2   15.00    1.04
  -5  11   2   15.60    1.07
   3 -11  -2   -0.68    0.39
  -3 -11   2    0.17    0.38
  -3 -11   2   -0.41    0.27
   3 -11  -2   -0.42    0.25
  -3  11   2    0.31    0.28
   3  11  -2    0.04    0.32
   3  11  -2    0.58    0.38
  -3  11   2    0.47    0.41
  -1 -11   2   49.50    1.99
   1 -11  -2   47.58    2.06
  -1 -11   2   47.12    1.75
   1 -11  -2   48.61    1.47
  -1  11   2   47.24    1.98
  -1  11   2   48.39    1.46
   1  11  -2   47.76    1.92
   1  11  -2   47.38    1.63
   1 -11   2    4.29    0.69
   1 -11   2    4.43    0.43
   1 -11   2    4.29    0.46
  -1 -11  -2    4.57    0.78
  -1  11  -2    4.20    0.63
   1  11   2    2.39    0.55
   3 -11   2   65.36    1.99
   3 -11   2   65.49    2.02
   3 -11   2   65.80    2.51
  -3 -11  -2   63.95    2.57
   3  11   2   65.96    2.49
  -3  11  -2   61.29    2.34
   5 -11   2    1.55    0.50
  -5 -11  -2    2.70    0.71
   5  11   2    1.32    0.30
   5  11   2    1.47    0.58
   5  11   2    1.06    0.27
  -5  11  -2    2.23    0.58
   7 -11   2   26.91    1.62
   7 -11   2   23.17    1.74
  -7 -11  -2   24.16    1.61
  -7  11  -2   25.48    1.31
   7  11   2   27.21    1.59
   7  11   2   22.63    1.22
   7  11   2   23.69    1.08
  -7  11  -2   24.33    1.40
   9 -11   2   -0.60    0.55
  -9 -11  -2   -0.32    0.56
  -9  11  -2    1.33    0.60
   9  11   2    0.31    0.38
   9  11   2   -0.12    0.50
 -11 -11  -2    2.76    0.90
  11 -11   2    4.18    0.97
 -11  11  -2    1.32    0.71
  11  11   2    2.61    0.79
 -11  11  -2    2.17    0.66
  11  11   2    2.67    0.63
 -13 -11  -2   -0.72    0.63
  13 -11   2   -0.24    0.64
  13  11   2   -0.37    0.42
  13  11   2    0.56    0.66
 -13  11  -2   -0.38    0.48
 -13  11  -2   -0.92    0.61
 -15 -11  -2   -0.05    0.73
  15 -11   2   -0.05    0.70
 -15  11  -2    1.35    0.88
 -15  11  -2    0.29    0.55
  15  11   2    0.71    0.55
  15  11   2    1.06    0.69
 -14 -12   2    5.15    1.13
  14 -12  -2    3.02    0.92
 -14  12   2    4.22    1.14
  14  12  -2    3.68    0.96
  14  12  -2    5.09    0.81
 -12 -12   2    0.63    0.66
  12 -12  -2    0.78    0.60
 -12  12   2   -0.21    0.69
 -12  12   2   -0.06    0.43
  12  12  -2    0.91    0.74
 -10 -12   2   11.17    1.30
  10 -12  -2   11.41    1.24
 -10  12   2   10.93    1.37
  10  12  -2   12.78    1.41
 -10  12   2   13.27    1.13
  -8 -12   2    3.41    0.74
   8  12  -2    4.23    0.83
   8  12  -2    0.64    0.59
  -8  12   2    1.25    0.80
  -8  12   2    2.45    0.61
  -6 -12   2   50.69    2.07
  -6 -12   2   46.79    2.56
   6 -12  -2   47.67    2.29
   6 -12  -2   48.22    1.92
  -6  12   2   48.88    2.06
   6  12  -2   50.25    2.08
   4 -12  -2   16.88    1.69
  -4 -12   2   19.44    1.11
   4 -12  -2   18.64    1.01
  -4 -12   2   16.60    1.18
   4  12  -2   20.05    1.21
   4  12  -2   20.17    1.33
  -4  12   2   21.34    1.29
  -4  12   2   18.52    1.00
   2 -12  -2    1.17    0.33
  -2 -12   2    1.11    0.48
   2 -12  -2    2.82    0.71
  -2 -12   2    1.29    0.39
   2  12  -2    1.45    0.49
  -2  12   2    1.13    0.47
   2  12  -2    0.75    0.66
  -2  12   2    1.84    0.35
   0 -12   2    4.59    0.73
   0 -12  -2    4.44    0.81
   0  12  -2    3.23    0.61
   0  12   2    2.51    0.59
   2 -12   2   65.57    2.10
   2 -12   2   61.33    1.98
   2 -12   2   66.69    2.53
  -2 -12  -2   65.63    2.64
   2  12   2   66.90    3.42
  -2  12  -2   61.24    2.43
  -4 -12  -2    1.63    0.65
   4 -12   2    2.08    0.79
   4 -12   2    1.15    0.42
   4 -12   2    1.47    0.37
   4  12   2    1.18    0.55
   6 -12   2   14.03    0.92
  -6 -12  -2   12.82    1.34
   6 -12   2   16.94    1.34
   6  12   2   15.71    0.78
   6  12   2   13.73    0.76
   6  12   2   17.76    1.32
  -6  12  -2   17.47    1.23
   8 -12   2   12.02    1.37
  -8 -12  -2   12.70    1.40
   8  12   2   10.22    0.82
  -8  12  -2   10.30    1.10
  -8  12  -2   12.62    1.08
   8  12   2   11.78    0.83
   8  12   2   11.48    1.26
 -10 -12  -2   19.93    1.71
 -10  12  -2   21.52    1.39
  10  12   2   19.66    1.19
 -10  12  -2   21.10    1.71
  10  12   2   19.96    1.53
 -12 -12  -2    2.98    0.94
  12 -12   2    2.22    0.90
  12  12   2    3.65    0.72
  12  12   2    2.86    0.84
 -12  12  -2    4.10    0.94
 -12  12  -2    2.43    0.68
  14 -12   2    0.29    0.79
 -14 -12  -2    0.06    0.74
 -14  12  -2    0.14    0.55
 -14  12  -2    0.57    0.77
  14  12   2    0.70    0.65
  14  12   2    0.76    0.50
  13 -13  -2    0.79    0.76
 -13 -13   2    1.88    0.89
  13  13  -2    1.36    0.62
 -13  13   2    0.69    0.82
 -13  13   2    0.47    0.52
  13  13  -2    1.49    0.90
 -11 -13   2   -0.14    0.56
  11 -13  -2    0.78    0.63
 -11  13   2    0.78    0.54
  11  13  -2    1.49    0.73
 -11  13   2    1.58    0.88
  11  13  -2    1.02    0.57
  -9 -13   2    2.20    0.71
   9 -13  -2    2.44    0.73
  -9  13   2    1.63    0.86
   9  13  -2    3.28    0.84
  -9  13   2    2.53    0.65
   9  13  -2    3.10    0.72
   7 -13  -2   71.61    2.64
  -7 -13   2   75.01    2.78
  -7 -13   2   68.31    2.80
   7 -13  -2   73.69    3.06
  -7  13   2   71.65    2.71
   7  13  -2   71.90    2.70
   5 -13  -2   22.46    1.64
   5 -13  -2   22.82    1.21
  -5 -13   2   22.11    1.32
  -5 -13   2   22.81    1.61
  -5  13   2   21.36    1.42
   5  13  -2   20.05    1.33
  -3 -13   2   14.70    0.98
  -3 -13   2   13.49    1.09
   3 -13  -2   11.50    0.81
   3 -13  -2   14.78    1.37
  -3  13   2   13.74    1.09
   3  13  -2   12.75    0.96
   3  13  -2   13.84    1.09
  -1 -13   2    1.22    0.40
   1 -13  -2    2.25    0.38
   1 -13  -2    0.76    0.95
  -1 -13   2    1.75    0.57
   1  13  -2    0.91    0.77
   1  13  -2    2.44    0.62
  -1  13   2    1.88    0.56
  -1  13   2    1.99    0.33
  -1 -13  -2   -0.49    0.79
   1 -13   2    0.28    0.34
   1 -13   2    0.41    0.50
   1 -13   2   -0.15    0.28
   1  13   2    0.60    0.46
  -1  13  -2   -0.36    0.38
  -3 -13  -2    0.17    0.56
   3 -13   2   -0.38    0.36
   3 -13   2    0.10    0.29
  -3  13  -2   -0.27    0.42
   3  13   2    0.34    0.50
   5 -13   2   24.49    1.23
  -5 -13  -2   22.44    1.58
   5 -13   2   21.61    1.51
   5 -13   2   21.89    1.13
  -5  13  -2   21.95    1.42
   5  13   2   22.14    1.54
   7 -13   2   26.50    1.75
  -7 -13  -2   27.83    1.84
  -7  13  -2   28.96    1.63
   7  13   2   28.27    1.17
   7  13   2   26.48    1.19
   7  13   2   27.68    1.73
   9 -13   2    8.37    1.27
  -9 -13  -2    8.15    1.26
  -9  13  -2    7.69    0.95
   9  13   2    8.07    1.17
   9  13   2    7.00    0.75
  -9  13  -2    6.84    0.95
  11 -13   2    2.54    1.04
 -11  13  -2    2.07    0.66
  11  13   2    1.52    0.54
  11  13   2    1.97    0.73
 -11  13  -2    2.11    0.78
  13 -13   2   -0.04    0.74
 -13 -13  -2   -0.38    0.68
 -13  13  -2    0.26    0.71
 -13  13  -2    0.26    0.56
  13  13   2   -0.43    0.64
  13  13   2   -0.17    0.46
  12 -14  -2    1.46    0.76
 -12 -14   2    1.13    0.72
  12  14  -2    1.76    0.78
 -12  14   2    2.62    1.01
 -12  14   2    1.33    0.63
  12  14  -2    2.01    0.67
 -10 -14   2   -0.44    0.52
  10 -14  -2   -0.72    0.53
  10  14  -2    0.22    0.54
 -10  14   2    0.27    0.74
 -10  14   2    0.45    0.57
  10  14  -2    0.59    0.62
   8 -14  -2    6.23    1.15
   8 -14  -2    6.64    0.93
  -8 -14   2    6.52    0.99
   8  14  -2    4.31    0.90
  -8  14   2    5.45    0.87
   8  14  -2    6.65    0.94
  -6 -14   2    1.60    0.64
   6 -14  -2    2.58    0.87
  -6 -14   2    1.74    0.62
   6 -14  -2    2.04    0.60
  -6  14   2    1.10    0.59
   6  14  -2    1.46    0.63
  -4 -14   2   67.35    2.40
   4 -14  -2   69.46    2.29
   4 -14  -2   67.06    2.81
  -4  14   2   61.95    2.22
   4  14  -2   62.34    2.53
  -4  14   2   62.94    2.61
   2 -14  -2   21.54    1.01
  -2 -14   2   18.56    1.31
  -2 -14   2   21.65    1.16
   2 -14  -2   19.68    1.52
   2  14  -2   21.09    1.37
  -2  14   2   22.10    1.46
   2  14  -2   22.17    1.19
  -2  14   2   22.26    0.98
   0 -14   2   -0.23    0.33
   0 -14   2    0.22    0.46
   0 -14   2   -0.28    0.34
   0 -14  -2   -0.34    0.56
   0  14   2    0.47    0.48
   0  14  -2    0.43    0.51
  -2 -14  -2    7.13    1.08
   2 -14   2    7.76    1.04
   2 -14   2   10.14    1.15
   2 -14   2    8.83    0.79
  -2  14  -2    8.80    0.97
   2  14   2    9.59    1.08
  -4 -14  -2    2.22    0.75
   4 -14   2    1.89    0.71
   4 -14   2    2.15    0.45
   4 -14   2    2.87    0.58
   4  14   2    2.07    0.68
  -4  14  -2    1.67    0.62
   6 -14   2    7.90    0.87
  -6 -14  -2    9.20    1.25
   6 -14   2    9.88    1.25
   6  14   2    8.60    0.62
  -6  14  -2    7.85    1.02
   6  14   2    8.81    1.18
   8 -14   2   18.82    1.64
  -8 -14  -2   23.61    1.73
   8  14   2   22.73    1.08
   8  14   2   20.49    1.60
  -8  14  -2   22.95    1.49
   8  14   2   17.63    1.04
  10 -14   2    3.45    0.96
 -10 -14  -2    3.79    1.04
  10  14   2    3.93    0.64
 -10  14  -2    4.90    0.87
  10  14   2    2.92    0.87
 -10  14  -2    2.78    0.77
  12 -14   2    2.63    0.99
 -12 -14  -2    3.00    0.96
 -12  14  -2    1.54    0.69
  12  14   2    1.73    0.79
  12  14   2    2.15    0.62
 -12  14  -2    2.99    0.87
  13 -15  -2    1.09    0.80
 -13 -15   2    0.79    0.73
 -13  15   2    1.60    0.96
  13  15  -2    0.84    0.73
  13  15  -2   -0.14    0.63
 -13  15   2    0.36    0.57
 -11 -15   2    0.65    0.66
  11 -15  -2    2.48    0.88
 -11  15   2    1.22    0.62
 -11  15   2    0.48    0.98
  11  15  -2    2.42    0.73
  11  15  -2    1.16    0.72
   9 -15  -2    2.35    0.88
  -9 -15   2    2.45    0.75
   9 -15  -2    1.81    0.76
   9  15  -2    0.98    0.64
  -9  15   2    2.28    0.70
   9  15  -2    2.43    0.74
   7 -15  -2   12.80    1.50
  -7 -15   2   15.28    1.31
  -7 -15   2   17.21    1.33
   7  15  -2   15.71    1.28
  -7  15   2   12.50    1.27
  -5 -15   2    0.38    0.55
  -5 -15   2    0.03    0.49
   5 -15  -2    0.23    0.45
   5 -15  -2   -0.55    0.63
  -5  15   2    0.27    0.57
   5  15  -2   -0.22    0.50
   3 -15  -2   19.21    1.04
   3 -15  -2   16.56    1.62
  -3 -15   2   18.27    1.19
  -3 -15   2   16.69    1.29
   3  15  -2   16.16    1.31
  -3  15   2   17.80    1.41
  -3  15   2   17.93    1.01
  -1 -15   2   12.34    0.93
   1 -15  -2   13.14    1.37
  -1 -15   2   10.25    1.14
   1 -15  -2   12.85    1.05
  -1  15   2    9.07    1.10
  -1  15   2    9.31    0.65
   1  15  -2   10.21    0.89
   1  15  -2    7.53    1.00
   1 -15   2    1.10    0.45
   1 -15   2    1.20    0.60
   1 -15   2    0.72    0.39
  -1 -15  -2    1.91    0.78
  -1  15  -2    1.68    0.62
   1  15   2    0.38    0.52
   3 -15   2    0.59    0.60
   3 -15   2   -0.12    0.35
   3 -15   2   -0.53    0.43
  -3 -15  -2   -0.81    0.57
   3  15   2    0.31    0.53
  -3  15  -2    0.28    0.58
   5 -15   2   14.46    1.11
  -5 -15  -2   16.12    1.60
   5 -15   2   14.25    1.45
  -5  15  -2   10.85    1.16
   5  15   2   17.65    1.46
   7 -15   2    1.71    0.78
  -7 -15  -2    1.95    0.85
   7 -15   2    1.66    0.61
  -7  15  -2    2.13    0.72
   7  15   2    2.61    0.83
   7  15   2    2.06    0.41
   7  15   2    1.74    0.44
  -9 -15  -2    5.17    1.07
   9 -15   2    4.52    1.02
   9  15   2    6.39    1.11
  -9  15  -2    5.86    0.95
   9  15   2    4.47    0.60
 -11 -15  -2   22.33    1.90
  11 -15   2   16.53    1.83
  11  15   2   16.06    1.14
 -11  15  -2   20.42    1.52
 -11  15  -2   20.44    1.46
  11  15   2   16.31    1.71
  13 -15   2    0.08    0.80
 -13 -15  -2    0.79    0.87
 -13  15  -2   -0.94    0.66
  13  15   2   -0.04    0.46
 -13  15  -2    0.62    0.68
  13  15   2   -0.20    0.66
 -12 -16   2    0.90    0.69
  12 -16  -2    0.35    0.72
  12  16  -2   -0.04    0.57
 -12  16   2    0.33    0.64
  10 -16  -2   -0.99    0.84
 -10 -16   2   -0.11    0.52
  10 -16  -2   -0.34    0.63
  10  16  -2   -0.54    0.56
 -10  16   2    0.23    0.56
  10  16  -2   -0.43    0.55
   8 -16  -2   13.02    1.57
   8 -16  -2   14.07    1.21
  -8 -16   2   13.30    1.35
   8  16  -2   13.73    1.36
  -8  16   2   16.17    1.38
   8  16  -2   16.04    1.55
  -6 -16   2    5.98    0.99
   6 -16  -2    5.78    0.84
  -6 -16   2    4.33    0.82
   6 -16  -2    4.05    1.01
  -6  16   2    3.26    0.81
   6  16  -2    4.93    0.87
   4 -16  -2   50.69    1.94
   4 -16  -2   48.95    2.46
  -4 -16   2   48.24    2.23
  -4 -16   2   49.72    2.10
  -4  16   2   51.66    2.40
   4  16  -2   46.79    2.23
  -2 -16   2    2.01    0.69
   2 -16  -2    2.53    0.51
   2 -16  -2    2.10    0.85
  -2 -16   2    2.59    0.60
  -2  16   2    2.15    0.73
   2  16  -2    0.73    0.62
   0 -16  -2    3.48    0.93
   0 -16   2    2.23    0.65
   0 -16   2    2.75    0.58
   0 -16   2    3.02    0.76
   0  16  -2    2.20    0.68
   0  16   2    3.24    0.80
   0  16   2    2.44    0.40
  -2 -16  -2    4.83    1.03
   2 -16   2    4.01    0.64
   2 -16   2    4.11    0.91
   2 -16   2    4.33    0.61
   2  16   2    3.68    0.84
  -2  16  -2    5.07    0.91
   4 -16   2   -0.11    0.61
   4 -16   2   -0.25    0.48
  -4 -16  -2   -0.96    0.53
   4  16   2   -0.37    0.54
  -4  16  -2    0.48    0.64
   6 -16   2    1.45    0.78
   6 -16   2    1.44    0.60
  -6 -16  -2    2.25    0.84
  -6  16  -2    0.41    0.62
   6  16   2    1.15    0.67
   8 -16   2    4.10    0.99
   8 -16   2    5.18    0.87
  -8 -16  -2    5.44    1.09
   8  16   2    4.98    0.56
  -8  16  -2    5.11    0.90
   8  16   2    3.15    0.55
   8  16   2    3.87    0.92
 -10 -16  -2    2.66    0.98
  10 -16   2    5.38    1.16
  10  16   2    4.06    1.03
  10  16   2    3.95    0.60
 -10  16  -2    3.24    0.85
 -12 -16  -2   -0.10    0.74
  12 -16   2    0.29    0.79
 -12  16  -2   -0.09    0.64
  12  16   2   -0.40    0.69
 -12  16  -2    0.77    0.74
  11 -17  -2   -1.12    0.63
 -11 -17   2    0.20    0.87
  11 -17  -2   -0.37    0.79
  11  17  -2    0.31    0.65
 -11  17   2   -0.49    0.53
  11  17  -2    1.68    0.82
   9 -17  -2    3.69    1.12
  -9 -17   2    4.31    0.89
   9 -17  -2    3.90    0.86
  -9  17   2    3.52    0.87
   9  17  -2    1.20    0.70
   9  17  -2    3.01    0.82
   7 -17  -2    0.72    0.78
  -7 -17   2    0.66    0.60
  -7 -17   2    2.07    0.72
   7 -17  -2    0.55    0.60
   7  17  -2    1.01    0.64
  -7  17   2    1.31    0.66
   5 -17  -2    4.81    1.09
  -5 -17   2    2.55    0.73
   5 -17  -2    3.05    0.66
   5  17  -2    3.10    0.79
  -5  17   2    4.99    0.98
   3 -17  -2    4.70    1.04
  -3 -17   2    4.57    0.88
   3 -17  -2    4.00    0.65
  -3 -17   2    4.17    0.75
  -3  17   2    2.49    0.56
   3  17  -2    5.72    0.99
  -3  17   2    5.53    1.01
   1 -17  -2   26.55    1.13
   1 -17  -2   27.45    1.87
  -1 -17   2   28.12    1.68
  -1 -17   2   27.69    1.42
   1  17  -2   25.01    1.66
  -1  17   2   26.24    1.76
  -1  17   2   25.36    1.11
   1 -17   2    4.43    0.90
   1 -17   2    4.72    0.71
  -1 -17  -2    6.37    1.17
  -1  17  -2    6.09    0.99
   1  17   2    4.35    0.89
   3 -17   2    0.81    0.70
   3 -17   2    0.51    0.52
  -3 -17  -2    2.40    0.91
   3  17   2    0.99    0.66
  -3  17  -2    1.55    0.67
  -5 -17  -2    3.04    0.91
   5 -17   2    2.50    0.66
   5 -17   2    4.35    0.99
   5  17   2    2.54    0.80
  -5  17  -2    3.10    0.80
   7 -17   2   -0.67    0.52
  -7 -17  -2    0.81    0.76
   7 -17   2   -0.67    0.56
   7  17   2    1.00    0.75
  -7  17  -2   -0.24    0.57
   9 -17   2    0.30    0.71
   9 -17   2    1.80    0.74
  -9 -17  -2   -0.12    0.64
  -9  17  -2   -0.43    0.61
   9  17   2   -0.21    0.32
   9  17   2    0.47    0.77
 -11 -17  -2    5.05    1.20
  11 -17   2    3.52    0.91
  11 -17   2    4.87    1.18
  11  17   2    4.54    0.66
 -11  17  -2    3.51    0.90
  11  17   2    4.43    1.11
  10 -18  -2    0.90    0.97
  10 -18  -2    0.69    0.70
 -10 -18   2   -0.10    0.57
  10  18  -2    0.74    0.77
 -10  18   2   -0.63    0.55
  10  18  -2   -0.01    0.75
   8 -18  -2    4.16    0.91
   8 -18  -2    5.06    1.16
  -8 -18   2    3.25    0.84
   8  18  -2    3.47    0.90
  -8  18   2    1.63    0.76
   8  18  -2    2.60    0.82
  -6 -18   2    0.41    0.60
  -6 -18   2    0.10    0.53
   6 -18  -2    1.61    0.83
   6  18  -2   -0.44    0.57
  -6  18   2    0.26    0.59
   4 -18  -2    1.51    0.56
  -4 -18   2    1.28    0.69
  -4 -18   2    2.09    0.67
   4 -18  -2   -0.65    0.69
  -4  18   2    1.21    0.68
   4  18  -2    0.99    0.70
   2 -18  -2    1.88    0.87
   2 -18  -2    1.52    0.49
  -2 -18   2    2.94    0.66
  -2 -18   2    2.61    0.77
  -2  18   2    1.37    0.72
   2  18  -2    1.60    0.72
  -2  18   2    2.27    0.50
   0 -18  -2    1.37    0.82
   0 -18   2    2.95    0.85
   0 -18   2    1.29    0.56
   0  18  -2    0.66    0.62
   0  18   2    1.54    0.75
  -2 -18  -2    2.15    0.88
   2 -18   2    1.67    0.76
   2 -18   2    0.47    0.51
   2  18   2    1.25    0.71
  -2  18  -2    0.99    0.67
   4 -18   2   -0.34    0.50
   4 -18   2    0.10    0.65
  -4 -18  -2   -0.78    0.67
  -4  18  -2   -0.52    0.52
   4  18   2   -0.64    0.53
  -6 -18  -2    2.78    0.94
   6 -18   2    1.99    0.66
   6 -18   2    3.66    1.02
   6  18   2    1.23    0.81
  -6  18  -2    2.69    0.82
  -8 -18  -2    8.62    1.37
   8 -18   2    8.79    1.38
   8  18   2    7.38    1.28
  -8  18  -2   10.10    1.29
 -10 -18  -2    0.66    0.81
  10 -18   2    0.73    0.81
  10 -18   2    1.62    0.76
  10  18   2    1.08    0.82
  10  18   2    0.93    0.42
  -9 -19   2    1.46    0.70
   9 -19  -2    1.35    0.94
   9 -19  -2    0.56    0.65
  -9  19   2   -0.78    0.55
   9  19  -2    1.49    0.78
   9  19  -2    1.07    0.75
  -7 -19   2    1.79    0.71
  -7 -19   2    0.93    0.63
   7 -19  -2    0.00    0.58
   7 -19  -2    0.69    1.18
  -7  19   2   -0.38    0.61
   7  19  -2    0.49    0.67
  -5 -19   2   -0.30    0.52
  -5 -19   2    0.17    0.54
   5 -19  -2    0.37    0.81
   5 -19  -2   -0.18    0.47
  -5  19   2    0.51    0.67
   3 -19  -2   -0.11    0.45
  -3 -19   2   -0.65    0.49
  -3 -19   2    0.26    0.61
   3 -19  -2    0.75    0.80
   3  19  -2   -0.39    0.62
  -3  19   2   -0.61    0.50
   1 -19  -2    0.26    0.36
  -1 -19   2   -0.47    0.46
  -1 -19   2    0.85    0.68
   1 -19  -2    0.33    0.74
  -1  19   2   -0.12    0.61
   1  19  -2    0.47    0.63
  -1 -19  -2    1.81    0.87
   1 -19   2   -0.18    0.56
   1 -19   2   -0.64    0.47
  -1  19  -2   -0.42    0.60
   1  19   2    0.04    0.60
   3 -19   2    0.51    0.58
   3 -19   2    1.92    0.79
  -3 -19  -2    0.70    0.75
  -3  19  -2    0.59    0.64
   5 -19   2    8.28    0.95
   5 -19   2    7.31    1.19
  -5 -19  -2    7.28    1.30
   5  19   2    5.99    1.10
   7 -19   2    1.05    0.67
  -7 -19  -2   -0.05    0.68
   7 -19   2    1.41    1.20
   7  19   2    1.11    0.75
  -7  19  -2    0.76    0.73
   9 -19   2   -0.39    0.60
   9 -19   2   -0.92    0.65
  -9 -19  -2    0.09    0.77
  -9  19  -2   -0.19    0.70
   9  19   2   -0.52    0.68
   8 -20  -2    8.10    1.40
  -8 -20   2    5.57    1.01
   8 -20  -2    9.24    1.18
   8  20  -2    7.64    1.25
  -8  20   2    5.26    1.06
   8  20  -2   12.11    1.48
  -6 -20   2    2.33    0.74
   6 -20  -2    2.57    1.15
   6 -20  -2    2.28    0.70
  -6 -20   2    2.79    0.79
   6  20  -2    2.06    0.83
  -6  20   2    0.99    0.71
  -4 -20   2    2.21    0.75
   4 -20  -2    3.70    0.74
   4 -20  -2    3.78    1.04
  -4 -20   2    3.32    0.80
  -4  20   2    5.18    1.06
   4  20  -2    3.54    0.91
  -2 -20   2   -0.34    0.55
   2 -20  -2    0.49    0.43
   2 -20  -2    0.59    0.81
  -2  20   2    0.00    0.58
   2  20  -2   -0.16    0.65
   0 -20  -2   -0.01    0.72
   0 -20   2   -0.60    0.53
   0 -20   2    0.17    0.52
   0  20  -2    0.42    0.71
   0  20   2   -1.08    0.49
  -2 -20  -2    0.81    0.80
   2 -20   2    0.67    0.67
   2 -20   2    0.64    0.57
   2  20   2   -0.64    0.55
  -2  20  -2    0.49    0.70
   4 -20   2    4.26    0.80
   4 -20   2    3.30    0.95
  -4 -20  -2    3.84    1.26
   4  20   2    4.34    1.06
  -4  20  -2    3.36    0.91
   6 -20   2    0.44    0.62
   6 -20   2   -0.98    0.84
  -6 -20  -2   -0.40    0.75
   6  20   2    0.06    0.68
  -6  20  -2    2.28    0.88
  -8 -20  -2    1.38    0.93
   8 -20   2   -0.31    0.72
   8 -20   2    0.24    0.66
   8  20   2    0.52    0.76
  -8  20  -2    0.58    0.70
  -7 -21   2   -1.11    0.54
   7 -21  -2    0.22    0.86
   7 -21  -2   -0.51    0.58
   7  21  -2    0.24    0.75
  -7  21   2   -0.85    0.58
  -5 -21   2    0.83    0.63
   5 -21  -2   -0.14    0.73
  -5 -21   2   -0.83    0.54
   5 -21  -2    0.48    0.71
  -5  21   2    0.35    0.66
   5  21  -2    0.10    0.67
   3 -21  -2    0.87    1.43
  -3 -21   2    0.56    0.66
  -3 -21   2    1.67    0.71
   3 -21  -2    0.20    0.45
  -3  21   2   -0.01    0.61
   3  21  -2   -0.29    0.60
  -1 -21   2    2.60    0.83
  -1 -21   2    1.83    0.74
   1 -21  -2    1.04    0.43
   1 -21  -2    0.42    1.12
  -1  21   2    1.29    0.75
   1  21  -2    1.05    0.76
  -1 -21  -2    0.68    1.15
   1 -21   2    1.15    0.60
   1 -21   2    0.68    0.73
   1  21   2    0.16    0.64
  -1  21  -2    0.45    0.73
  -3 -21  -2   -1.03    0.70
   3 -21   2   -0.06    0.64
   3 -21   2   -0.52    0.51
  -3  21  -2    0.38    0.66
   3  21   2    0.08    0.67
   5 -21   2    0.36    0.84
   5 -21   2   -0.92    0.64
  -5 -21  -2   -0.49    0.66
   5  21   2   -1.24    0.54
  -5  21  -2   -0.71    0.59
  -4 -22   2    0.15    0.63
  -4 -22   2    0.32    0.63
   4 -22  -2   -0.03    0.51
   4 -22  -2    0.81    0.84
  -4  22   2   -0.19    0.74
   4  22  -2    0.61    0.76
  -2 -22   2   -0.44    0.53
   2 -22  -2    0.68    0.80
   2 -22  -2   -0.22    0.42
  -2 -22   2    0.55    0.58
   2  22  -2   -0.61    0.58
  -2  22   2   -0.33    0.68
   0 -22  -2    1.15    0.94
   0 -22   2    1.26    0.66
   0 -22   2    0.74    0.72
   0  22   2    0.56    0.70
   0  22  -2    1.21    0.77
  -2 -22  -2   -0.20    0.85
   2 -22   2    0.99    0.82
  -2  22  -2    2.02    0.84
   2  22   2    1.62    0.87
   4 -22   2    0.03    0.78
   4 -22   2   -0.51    0.66
  -4 -22  -2   -0.61    0.71
   4  22   2   -0.34    0.68
  -4  22  -2   -0.83    0.65
 -16   0   3    0.42    0.71
  16   0  -3   -0.81    0.58
 -14   0   3   -0.61    0.57
  14   0  -3    1.09    0.69
 -12   0   3   -0.28    0.55
  12   0  -3   -0.85    0.44
  10   0  -3    0.14    0.48
 -10   0   3    1.13    0.57
   8   0  -3    0.25    0.38
  -8   0   3   -0.42    0.35
   8   0  -3   -0.12    0.18
   8   0  -3   -0.19    0.18
  -6   0   3    0.19    0.39
   6   0  -3    0.04    0.25
   6   0  -3   -0.61    0.27
   6   0  -3   -0.37    0.23
   4   0  -3    0.08    0.33
   4   0  -3    0.11    0.32
   4   0  -3   -0.14    0.32
   4   0  -3    0.03    0.32
  -4   0   3    0.09    0.42
   2   0  -3   -0.01    0.29
   2   0  -3   -0.21    0.28
  -2   0   3   -0.22    0.24
  -2   0   3   -0.30    0.30
   2   0  -3    0.17    0.30
   0   0   3    0.30    0.34
   0   0   3   -0.14    0.28
   0   0  -3    0.00    0.30
   0   0  -3   -0.49    0.24
   0   0  -3   -0.36    0.24
   0   0  -3    0.06    0.28
   2   0   3    0.00    0.37
  -2   0  -3    0.17    0.32
  -2   0  -3   -0.19    0.30
  -2   0  -3    0.52    0.38
   2   0   3   -0.17    0.31
   2   0   3    0.43    0.35
  -4   0  -3   -0.12    0.37
  -4   0  -3   -0.28    0.32
   4   0   3   -0.27    0.33
   4   0   3    0.04    0.38
   4   0   3   -1.14    0.33
  -4   0  -3   -0.89    0.22
   6   0   3    0.36    0.38
  -6   0  -3   -0.12    0.33
   6   0   3   -0.01    0.34
   6   0   3    0.12    0.34
  -8   0  -3    0.12    0.43
  -8   0  -3   -0.16    0.34
   8   0   3    0.01    0.39
 -10   0  -3    0.18    0.48
  10   0   3    1.18    0.58
 -10   0  -3    0.02    0.55
 -12   0  -3    0.14    0.44
  12   0   3    0.17    0.54
 -12   0  -3   -0.07    0.60
 -14   0  -3    0.95    0.76
 -14   0  -3    0.10    0.45
  14   0   3    0.67    0.61
 -16   0  -3    0.45    0.81
 -16   0  -3    0.56    0.47
  16   0   3    0.76    0.71
  17  -1  -3    3.08    1.03
 -17  -1   3    4.40    1.14
 -17   1   3    2.20    0.92
  17   1  -3    3.60    1.06
  15  -1  -3    5.44    1.10
 -15  -1   3    9.23    1.41
 -15   1   3    5.39    1.12
  15   1  -3    6.07    1.12
  13  -1  -3    0.16    0.61
 -13  -1   3    0.18    0.63
 -13   1   3    0.24    0.68
  13   1  -3   -0.25    0.54
 -11  -1   3  112.10    3.91
  11  -1  -3  105.06    3.81
 -11   1   3  108.08    3.92
  11   1  -3  105.80    3.83
  -9  -1   3    0.72    0.55
   9  -1  -3    1.05    0.57
   9   1  -3    0.29    0.45
   7  -1  -3   29.91    1.10
   7  -1  -3   31.90    1.49
   7  -1  -3   29.03    1.09
  -7  -1   3   30.24    1.50
   7   1  -3   30.40    1.50
   7   1  -3   30.69    1.16
  -7   1   3   30.38    1.52
   7   1  -3   30.22    1.10
   5  -1  -3   67.99    2.40
  -5  -1   3   72.64    2.42
   5  -1  -3   70.13    2.41
   5  -1  -3   72.09    2.22
   5  -1  -3   71.65    2.42
   5   1  -3   75.01    2.23
   5   1  -3   68.67    2.35
  -5   1   3   74.32    2.50
   5   1  -3   69.13    2.25
   5   1  -3   73.30    2.48
  -3  -1   3    0.73    0.39
   3  -1  -3    0.23    0.32
  -3  -1   3    0.48    0.36
   3   1  -3    0.18    0.37
  -3   1   3    0.88    0.39
   3   1  -3    0.28    0.34
  -3   1   3   -0.25    0.32
  -3   1   3    0.57    0.44
   3   1  -3    0.84    0.38
   3   1  -3    0.50    0.36
   1  -1  -3    7.93    0.81
  -1  -1   3    6.32    0.65
   1  -1  -3    7.53    0.65
   1  -1  -3    8.22    0.68
   1   1  -3    6.20    0.66
  -1   1   3    5.88    0.66
   1   1  -3    7.08    0.57
   1   1  -3    7.93    0.72
  -1   1   3    6.08    0.66
  -1  -1  -3   -0.36    0.25
   1  -1   3   -0.22    0.26
   1  -1   3   -0.22    0.29
  -1  -1  -3    0.70    0.42
  -1  -1  -3   -0.03    0.31
  -1   1  -3   -0.13    0.32
  -1   1  -3   -0.18    0.31
   1   1   3    0.21    0.34
  -1   1  -3   -0.02    0.26
   1   1   3    0.64    0.34
  -1   1  -3    0.39    0.32
   1   1   3    0.24    0.27
  -3  -1  -3    6.76    0.63
   3  -1   3    7.25    0.71
  -3  -1  -3    6.87    0.69
  -3  -1  -3    6.73    0.76
   3  -1   3    7.58    0.63
   3   1   3    6.05    0.69
  -3   1  -3    6.42    0.80
  -3   1  -3    5.81    0.72
   3   1   3    7.65    0.69
   3   1   3    6.37    0.78
  -3   1  -3    7.33    0.63
  -3   1  -3    6.81    0.67
   5  -1   3    3.83    0.63
  -5  -1  -3    3.82    0.50
  -5  -1  -3    3.92    0.59
  -5  -1  -3    3.67    0.63
  -5   1  -3    3.94    0.55
   5   1   3    2.50    0.57
   5   1   3    5.00    0.63
  -5   1  -3    3.76    0.62
  -5   1  -3    3.24    0.53
   5   1   3    4.91    0.65
  -5   1  -3    4.21    0.64
  -7  -1  -3   14.14    1.00
   7  -1   3   12.88    0.98
  -7   1  -3   13.66    0.96
  -7   1  -3   12.75    0.97
   7   1   3   11.92    0.95
   7   1   3   13.40    0.93
  -9  -1  -3   14.65    1.20
   9  -1   3   15.39    1.16
   9   1   3   13.94    1.08
  -9   1  -3   14.85    1.09
  -9   1  -3   16.56    1.17
  11  -1   3    1.64    0.69
 -11  -1  -3    1.70    0.71
 -11  -1  -3    2.67    0.65
 -11   1  -3    1.74    0.75
  11   1   3    1.94    0.68
 -11   1  -3    1.99    0.60
 -13  -1  -3    0.56    0.74
  13  -1   3   -0.18    0.55
 -13  -1  -3    0.92    0.52
 -13   1  -3    0.90    0.71
  13   1   3    0.82    0.61
 -13   1  -3    0.01    0.49
 -15  -1  -3    4.28    0.71
  15  -1   3    2.79    0.97
 -15  -1  -3    3.85    1.39
 -15   1  -3    4.58    0.71
 -15   1  -3    6.88    1.23
  15   1   3    1.43    0.75
  16  -2  -3    1.36    0.78
 -16  -2   3    1.21    0.83
  16   2  -3   -0.57    0.62
 -16   2   3   -0.20    0.68
  14  -2  -3    1.08    0.75
 -14  -2   3    0.68    0.67
 -14   2   3    1.85    0.80
  14   2  -3    1.97    0.79
 -12  -2   3   17.72    1.50
  12  -2  -3   15.48    1.51
  12   2  -3   16.21    1.58
 -12   2   3   15.88    1.57
 -10  -2   3    4.93    0.84
  10  -2  -3    4.00    0.77
  10   2  -3    4.77    0.83
 -10   2   3    5.23    0.94
   8  -2  -3    8.26    0.49
   8  -2  -3    9.02    0.96
   8  -2  -3    8.93    0.54
  -8  -2   3    9.86    0.99
   8   2  -3    9.52    1.05
  -8   2   3   10.03    1.03
   8   2  -3    9.04    0.55
   8   2  -3    8.59    0.59
  -6  -2   3   19.96    1.14
   6  -2  -3   17.69    1.07
   6  -2  -3   18.64    0.86
  -6   2   3   18.82    1.19
   6   2  -3   20.38    1.18
   6   2  -3   20.30    0.95
   6   2  -3   18.99    0.89
  -6   2   3   19.23    0.91
   4  -2  -3   66.90    2.11
   4  -2  -3   68.74    2.21
   4  -2  -3   64.34    2.18
   4  -2  -3   64.28    2.27
  -4  -2   3   63.37    2.29
  -4  -2   3   66.27    2.18
   4   2  -3   63.13    2.12
  -4   2   3   64.83    2.30
  -4   2   3   64.53    2.15
   4   2  -3   66.09    2.17
   4   2  -3   68.77    2.32
   4   2  -3   67.59    2.13
  -2  -2   3   62.23    1.88
  -2  -2   3   58.85    2.07
   2  -2  -3   60.07    2.12
   2  -2  -3   59.19    1.93
   2   2  -3   61.88    2.05
   2   2  -3   63.38    2.09
  -2   2   3   58.02    2.07
   2   2  -3   58.85    1.85
  -2   2   3   62.00    2.07
   0  -2   3   16.18    0.93
   0  -2  -3   17.38    0.96
   0  -2  -3   17.79    0.98
   0  -2  -3   16.88    0.79
   0   2   3   16.83    0.79
   0   2   3   16.26    1.00
   0   2  -3   16.09    0.99
   0   2  -3   17.15    0.71
   0   2  -3   16.31    0.97
   0   2  -3   17.30    0.74
  -2  -2  -3   55.74    1.93
   2  -2   3   56.88    1.68
   2  -2   3   55.56    1.96
  -2  -2  -3   53.68    1.72
  -2  -2  -3   55.49    2.01
   2   2   3   55.86    1.91
  -2   2  -3   54.44    2.01
  -2   2  -3   56.59    2.06
   2   2   3   57.76    1.76
  -2   2  -3   55.13    1.66
   2   2   3   56.12    2.08
  -2   2  -3   51.06    1.88
   4  -2   3   46.54    1.84
   4  -2   3   47.37    1.63
  -4  -2  -3   49.53    1.82
  -4  -2  -3   47.86    1.86
  -4  -2  -3   47.80    1.61
  -4   2  -3   47.48    1.87
   4   2   3   49.46    1.68
   4   2   3   49.08    1.82
  -4   2  -3   48.83    1.62
   4   2   3   46.71    1.93
  -4   2  -3   48.12    1.78
  -4   2  -3   50.20    1.93
  -6  -2  -3   13.87    0.80
   6  -2   3   14.96    0.89
  -6  -2  -3   13.10    0.99
   6  -2   3   13.86    0.99
  -6   2  -3   13.65    0.97
   6   2   3   15.40    0.91
  -6   2  -3   12.57    0.87
   6   2   3   13.64    0.99
  -8  -2  -3    5.66    0.82
   8  -2   3    4.48    0.74
  -8   2  -3    6.57    0.78
   8   2   3    6.19    0.80
   8   2   3    3.70    0.63
  -8   2  -3    4.44    0.69
 -10  -2  -3    9.44    1.15
  10  -2   3    9.25    1.12
 -10   2  -3    9.64    0.97
  10   2   3    9.40    1.03
  10   2   3    8.67    1.01
 -10   2  -3    9.85    1.11
 -12  -2  -3    0.20    0.60
  12  -2   3    0.77    0.63
 -12  -2  -3    0.33    0.52
  12   2   3    0.17    0.53
 -12   2  -3    0.76    0.63
 -12   2  -3    0.97    0.51
 -14  -2  -3    0.06    0.50
  14  -2   3    0.00    0.63
 -14  -2  -3   -0.46    0.68
 -14   2  -3    0.83    0.75
 -14   2  -3    1.79    0.54
  14   2   3    0.71    0.60
 -16  -2  -3   18.35    1.21
  16  -2   3   15.68    1.76
 -16  -2  -3   16.58    1.83
 -16   2  -3   15.41    1.11
  16   2   3   13.79    1.56
 -16   2  -3   16.60    1.78
 -17  -3   3    2.87    1.00
  17  -3  -3    3.20    0.98
  17   3  -3    1.86    0.96
 -17   3   3    2.94    1.01
  15  -3  -3    1.32    0.75
 -15  -3   3    1.99    0.84
  15   3  -3    1.18    0.76
 -15   3   3    0.52    0.68
  13  -3  -3    3.44    0.89
 -13  -3   3    1.56    0.73
 -13   3   3    3.17    0.91
  13   3  -3    3.87    0.92
  11  -3  -3   40.00    2.05
 -11  -3   3   42.01    2.15
  11   3  -3   43.73    2.15
 -11   3   3   43.96    2.27
  -9  -3   3    4.30    0.78
   9   3  -3    4.56    0.51
   9   3  -3    4.67    0.45
   9   3  -3    4.56    0.80
  -9   3   3    5.09    0.85
  -7  -3   3    6.81    0.79
   7  -3  -3    7.72    0.85
   7  -3  -3    6.53    0.49
  -7   3   3    7.17    0.60
  -7   3   3    6.58    0.90
   7   3  -3    7.46    0.66
   7   3  -3    6.30    0.54
   7   3  -3    5.98    0.80
   5  -3  -3   57.24    1.99
   5  -3  -3   52.63    1.94
   5  -3  -3   54.08    1.79
  -5  -3   3   56.40    1.97
  -5  -3   3   54.54    2.09
  -5   3   3   54.28    2.12
  -5   3   3   56.86    1.90
   5   3  -3   53.35    1.93
   5   3  -3   55.30    1.83
   3  -3  -3   26.53    1.12
   3  -3  -3   26.42    1.27
   3  -3  -3   26.40    1.12
  -3  -3   3   27.48    1.30
  -3  -3   3   26.19    1.11
   3  -3  -3   25.72    1.27
  -3   3   3   26.17    1.30
   3   3  -3   25.62    1.07
   3   3  -3   25.01    1.19
   3   3  -3   26.78    1.28
  -3   3   3   24.53    1.22
  -1  -3   3   16.79    0.72
  -1  -3   3   16.61    0.98
   1  -3  -3   17.04    0.95
   1  -3  -3   18.15    0.99
   1  -3  -3   16.51    0.78
   1  -3  -3   18.03    1.04
  -1   3   3   18.41    0.82
   1   3  -3   15.60    0.98
   1   3  -3   14.71    0.96
   1   3  -3   16.23    0.69
  -1   3   3   16.59    1.02
  -1  -3  -3    0.01    0.43
   1  -3   3    1.07    0.44
  -1  -3  -3    0.65    0.37
  -1  -3  -3   -0.25    0.23
  -1   3  -3    0.19    0.35
  -1   3  -3   -0.07    0.33
   1   3   3    0.39    0.28
   1   3   3    0.01    0.43
   1   3   3   -0.06    0.40
  -1   3  -3    1.30    0.47
  -3  -3  -3  183.09    5.08
   3  -3   3  175.42    4.64
   3  -3   3  179.72    5.05
  -3  -3  -3  175.47    5.01
  -3  -3  -3  173.83    4.68
   3   3   3  183.32    4.74
   3   3   3  182.25    5.01
   3   3   3  178.38    5.17
  -3   3  -3  179.32    5.02
  -3   3  -3  178.86    5.06
  -3   3  -3  177.53    5.13
  -3   3  -3  181.06    4.65
   5  -3   3   11.83    0.93
  -5  -3  -3   12.19    0.94
  -5  -3  -3   11.26    0.68
   5  -3   3   11.49    0.75
  -5   3  -3   11.63    0.75
   5   3   3   11.66    0.75
   5   3   3   11.26    0.93
  -5   3  -3   11.18    0.90
  -7  -3  -3    6.70    0.67
   7  -3   3    8.00    0.90
   7  -3   3    6.65    0.73
  -7  -3  -3    9.98    1.02
  -7   3  -3    6.62    0.78
   7   3   3    8.30    0.79
   7   3   3    7.26    0.85
  -7   3  -3    8.16    0.78
   9  -3   3    7.98    1.03
  -9  -3  -3    9.80    1.21
  -9   3  -3    9.22    0.94
   9   3   3   10.31    1.01
   9   3   3    7.77    0.93
  -9   3  -3    9.40    1.00
  11  -3   3    0.75    0.60
 -11  -3  -3   -0.72    0.52
 -11   3  -3    1.71    0.68
  11   3   3    1.39    0.58
 -11   3  -3   -0.61    0.41
  11   3   3    0.63    0.50
  13  -3   3    2.68    0.83
 -13  -3  -3    4.61    1.04
 -13   3  -3    3.88    0.70
  13   3   3    2.72    0.73
 -13   3  -3    2.95    0.86
 -15  -3  -3   14.26    1.14
 -15  -3  -3   14.97    1.75
  15  -3   3    8.77    1.27
 -15   3  -3   13.31    1.05
  15   3   3    8.57    1.21
 -15   3  -3   11.73    1.49
  16  -4  -3    0.18    0.68
 -16  -4   3    1.02    0.82
  16   4  -3    0.55    0.77
 -16   4   3   -0.84    0.61
 -14  -4   3    3.78    0.96
  14  -4  -3    2.16    0.81
  14   4  -3    4.00    1.06
 -14   4   3    4.88    1.33
  12  -4  -3   10.09    1.28
 -12  -4   3    8.71    1.21
  12   4  -3    8.98    1.24
 -12   4   3    8.71    1.26
  10  -4  -3   21.29    1.40
 -10  -4   3   22.26    1.50
 -10   4   3   21.34    1.57
  10   4  -3   21.38    0.95
  10   4  -3   23.62    1.54
  10   4  -3   21.48    0.89
  -8  -4   3    0.35    0.42
   8  -4  -3    0.28    0.23
   8  -4  -3    0.23    0.38
   8   4  -3    0.38    0.28
   8   4  -3    0.91    0.58
  -8   4   3    0.10    0.28
  -8   4   3    0.22    0.45
  -6  -4   3    3.00    0.56
   6  -4  -3    2.27    0.49
   6  -4  -3    2.82    0.40
  -6   4   3    2.80    0.48
  -6   4   3    1.61    0.54
   6   4  -3    1.93    0.40
   6   4  -3    2.40    0.46
   4  -4  -3    1.26    0.39
  -4  -4   3    0.47    0.39
   4  -4  -3    0.88    0.35
  -4  -4   3    0.25    0.33
  -4  -4   3    1.59    0.43
  -4   4   3    0.41    0.50
   4   4  -3    0.83    0.33
  -4   4   3    0.40    0.36
   4   4  -3    0.61    0.38
  -2  -4   3   69.61    2.35
   2  -4  -3   74.36    2.43
   2  -4  -3   71.91    2.14
   2  -4  -3   74.61    2.17
  -2  -4   3   70.92    2.07
   2  -4  -3   69.53    2.31
   2  -4  -3   71.89    2.46
  -2  -4   3   69.59    2.42
   2   4  -3   71.85    2.35
   2   4  -3   71.33    2.42
   2   4  -3   69.17    2.05
  -2   4   3   70.67    2.39
   0  -4   3   10.01    0.84
   0  -4  -3    9.62    0.80
   0  -4  -3    9.11    0.56
   0  -4   3   11.39    0.95
   0  -4  -3   12.62    1.02
   0   4  -3   10.49    0.86
   0   4   3   10.13    0.88
   0   4  -3   10.49    0.88
   0   4   3    9.92    0.56
   0   4   3   11.41    0.96
   2  -4   3   13.22    0.94
  -2  -4  -3   12.64    1.01
   2  -4   3   12.20    0.90
  -2  -4  -3   12.00    0.89
  -2  -4  -3   12.78    0.60
   2   4   3   13.14    0.97
   2   4   3   12.81    0.63
  -2   4  -3   11.87    0.90
  -2   4  -3   12.22    0.96
   2   4   3   12.56    1.07
   4  -4   3    5.49    0.76
  -4  -4  -3    5.62    0.50
  -4  -4  -3    5.68    0.72
   4  -4   3    5.63    0.49
   4   4   3    4.43    0.70
   4   4   3    6.25    0.56
  -4   4  -3    5.44    0.49
  -4   4  -3    5.62    0.72
   6  -4   3    2.69    0.47
  -6  -4  -3    2.24    0.56
   6  -4   3    2.25    0.58
  -6  -4  -3    1.95    0.37
  -6   4  -3    2.55    0.47
   6   4   3    2.99    0.59
  -6   4  -3    1.98    0.52
   6   4   3    2.02    0.43
  -8  -4  -3    3.17    0.72
   8  -4   3    3.74    0.83
   8   4   3    3.17    0.59
  -8   4  -3    2.51    0.55
  -8   4  -3    2.54    0.57
   8   4   3    3.36    0.68
  10  -4   3    1.66    0.69
 -10  -4  -3    4.58    0.87
 -10   4  -3    3.39    0.66
  10   4   3    3.12    0.67
 -10   4  -3    3.19    0.72
  10   4   3    3.89    0.74
 -12  -4  -3    0.02    0.66
  12  -4   3    0.63    0.65
  12   4   3    0.30    0.48
 -12   4  -3   -0.03    0.58
 -12   4  -3   -0.61    0.40
  12   4   3    0.00    0.48
 -14  -4  -3    0.27    0.67
 -14   4  -3   -0.78    0.60
  14   4   3    0.10    0.54
 -14   4  -3    0.21    0.49
 -16  -4  -3    2.16    1.00
  16  -4   3    1.43    0.82
 -16  -4  -3    2.45    0.99
 -16   4  -3    2.68    0.96
  16   4   3    0.55    0.67
 -16   4  -3    0.97    0.49
  15  -5  -3    4.78    1.04
 -15  -5   3    3.26    0.97
  15   5  -3    4.52    1.06
 -15   5   3    2.45    0.91
  13  -5  -3    1.33    0.65
 -13  -5   3    2.51    0.86
 -13   5   3    4.04    0.96
  13   5  -3    2.41    0.79
  11  -5  -3    3.56    0.83
 -11  -5   3    4.74    0.91
  11   5  -3    3.76    0.49
  11   5  -3    3.46    0.85
 -11   5   3    3.15    0.90
  -9  -5   3    1.06    0.58
   9  -5  -3    0.66    0.25
  -9  -5   3    0.86    0.36
   9   5  -3    1.03    0.58
  -9   5   3    0.66    0.33
  -9   5   3    1.51    0.66
   9   5  -3    1.23    0.34
  -7  -5   3    1.03    0.47
   7  -5  -3    1.75    0.33
   7  -5  -3    1.84    0.50
  -7  -5   3    1.10    0.33
  -7   5   3    0.88    0.48
   7   5  -3    1.31    0.36
   7   5  -3    2.10    0.58
  -7   5   3    1.08    0.38
   5  -5  -3   17.74    0.97
  -5  -5   3   19.39    0.99
   5  -5  -3   18.21    0.89
   5  -5  -3   17.93    0.97
  -5  -5   3   17.88    1.14
  -5  -5   3   17.75    0.98
   5   5  -3   18.44    0.95
  -5   5   3   18.68    1.20
  -5   5   3   18.86    1.01
   5   5  -3   18.46    0.98
   3  -5  -3   12.93    0.72
   3  -5  -3   12.49    0.79
  -3  -5   3   13.23    0.94
  -3  -5   3   13.51    0.73
   3  -5  -3   12.00    0.74
  -3  -5   3   12.55    0.85
   3   5  -3   14.26    0.92
  -3   5   3   12.13    0.92
   3   5  -3   12.69    0.71
   1  -5  -3   41.32    1.72
  -1  -5   3   39.97    1.62
   1  -5  -3   40.96    1.30
  -1  -5   3   41.18    1.70
   1  -5  -3   40.19    1.59
   1  -5  -3   39.88    1.28
   1  -5  -3   39.68    1.66
  -1   5   3   40.58    1.69
   1   5  -3   41.43    1.64
   1   5  -3   39.50    1.66
   1  -5   3    0.01    0.42
  -1  -5  -3    0.31    0.50
   1  -5   3   -0.23    0.35
  -1  -5  -3    0.84    0.40
  -1  -5  -3    0.27    0.19
  -1   5  -3   -0.71    0.37
  -1   5  -3   -0.08    0.37
   1   5   3    0.33    0.43
   1   5   3    0.28    0.19
   1   5   3    0.35    0.41
  -3  -5  -3    1.75    0.55
   3  -5   3    1.00    0.47
  -3  -5  -3    0.98    0.23
   3   5   3    0.76    0.26
   3   5   3    1.38    0.51
  -3   5  -3    0.26    0.41
  -5  -5  -3    6.92    0.83
   5  -5   3    5.52    0.53
  -5  -5  -3    5.72    0.51
   5  -5   3    4.34    0.70
  -5   5  -3    5.22    0.52
   5   5   3    5.00    0.74
   5   5   3    4.36    0.49
  -5   5  -3    4.21    0.65
   7  -5   3    9.33    1.02
   7  -5   3    8.85    0.74
  -7  -5  -3    8.51    1.01
  -7  -5  -3    9.74    0.66
  -7   5  -3   10.14    0.95
   7   5   3    9.45    0.74
  -7   5  -3   10.79    0.80
   7   5   3    9.32    1.00
  -9  -5  -3    0.33    0.53
   9  -5   3   -0.32    0.46
   9   5   3    0.80    0.44
  -9   5  -3   -0.43    0.38
   9   5   3   -0.19    0.42
  -9   5  -3    0.16    0.45
  11  -5   3    0.02    0.57
 -11  -5  -3    1.16    0.63
 -11   5  -3    0.25    0.49
 -11   5  -3    1.73    0.67
  11   5   3    0.28    0.56
 -13  -5  -3    0.97    0.71
  13  -5   3    0.31    0.67
 -13   5  -3    0.83    0.54
  13   5   3    1.44    0.65
  13   5   3    1.16    0.66
 -13   5  -3    0.73    0.68
  15  -5   3    6.48    1.18
 -15  -5  -3    6.24    1.24
 -15   5  -3    6.14    1.18
  15   5   3    5.65    0.98
 -15   5  -3    6.78    0.80
  16  -6  -3    0.33    0.80
 -16  -6   3    2.63    0.85
  16   6  -3    1.82    0.86
 -16   6   3    1.14    0.88
  14  -6  -3    0.83    0.85
 -14  -6   3    0.56    0.58
 -14   6   3    0.44    0.71
  14   6  -3   -0.17    0.87
 -12  -6   3    0.99    0.68
  12  -6  -3    0.41    0.61
 -12   6   3    0.23    0.72
  12   6  -3    0.29    0.60
  10  -6  -3    1.06    0.57
  10  -6  -3    1.22    0.30
 -10  -6   3    0.10    0.53
 -10  -6   3    1.44    0.43
 -10   6   3    0.85    0.34
 -10   6   3    0.82    0.66
  10   6  -3    1.17    0.39
  10   6  -3    0.88    0.59
  -8  -6   3    1.36    0.56
   8  -6  -3    1.36    0.50
  -8  -6   3    2.21    0.45
   8  -6  -3    1.30    0.32
  -8   6   3    1.71    0.43
  -8   6   3    1.49    0.62
   8   6  -3    2.60    0.68
   8   6  -3    2.31    0.46
  -6  -6   3   -0.14    0.24
  -6  -6   3   -0.07    0.37
  -6  -6   3    0.03    0.35
   6  -6  -3    0.18    0.32
   6  -6  -3   -0.13    0.22
   6   6  -3    0.64    0.34
   6   6  -3   -0.20    0.29
  -6   6   3   -0.06    0.43
  -6   6   3   -0.11    0.30
  -4  -6   3    2.25    0.52
   4  -6  -3    2.68    0.43
   4  -6  -3    2.38    0.42
  -4  -6   3    2.64    0.45
  -4  -6   3    2.67    0.48
   4   6  -3    2.58    0.42
  -4   6   3    2.59    0.60
  -4   6   3    2.02    0.50
   4   6  -3    1.92    0.45
   2  -6  -3   12.19    0.81
   2  -6  -3   13.19    1.05
  -2  -6   3   17.50    1.45
  -2  -6   3   12.09    0.62
   2  -6  -3   12.85    0.64
   2  -6  -3   13.30    0.66
  -2  -6   3   12.24    0.97
  -2   6   3   11.93    0.94
   2   6  -3   13.46    0.93
   2   6  -3   12.58    0.62
   0  -6  -3   14.92    1.08
   0  -6   3   13.56    0.97
   0   6   3   12.46    0.96
   0   6  -3   12.16    0.93
  -2  -6  -3   44.29    1.86
   2  -6   3   42.68    1.81
   2   6   3   43.07    1.84
  -2   6  -3   43.43    1.76
  -4  -6  -3   13.21    0.58
  -4  -6  -3   12.89    1.02
   4  -6   3   13.74    1.03
  -4   6  -3   12.99    0.61
  -4   6  -3   13.30    0.98
   4   6   3   12.90    1.01
   4   6   3   13.76    0.62
  -6  -6  -3    2.55    0.61
  -6  -6  -3    3.27    0.42
   6  -6   3    3.48    0.47
   6  -6   3    4.04    0.74
  -6   6  -3    2.83    0.57
   6   6   3    3.51    0.49
   6   6   3    4.26    0.69
  -6   6  -3    4.12    0.51
   8  -6   3    1.71    0.65
  -8  -6  -3    2.24    0.68
   8  -6   3    2.04    0.62
  -8  -6  -3    2.13    0.43
  -8   6  -3    1.99    0.58
   8   6   3    1.20    0.44
   8   6   3    1.39    0.55
  -8   6  -3    2.79    0.56
 -10  -6  -3   12.83    1.35
  10  -6   3    9.19    1.24
  10   6   3   12.08    1.22
  10   6   3   11.55    0.99
 -10   6  -3   15.17    1.17
 -10   6  -3   12.42    1.12
  12  -6   3    1.40    0.75
 -12  -6  -3    1.06    0.75
  12   6   3    0.99    0.57
 -12   6  -3    0.87    0.63
 -12   6  -3    0.30    0.47
  12   6   3    0.78    0.59
 -14  -6  -3   -0.39    0.66
  14  -6   3    0.02    0.63
  14   6   3    0.08    0.53
 -14   6  -3   -0.69    0.43
 -14   6  -3   -0.15    0.66
  14   6   3   -0.04    0.47
 -16  -6  -3   -0.40    0.70
  16  -6   3   -1.02    0.65
 -16   6  -3   -0.46    0.70
 -16   6  -3    0.40    0.50
 -15  -7   3    4.40    1.03
  15  -7  -3    4.15    1.00
  15   7  -3    5.77    1.19
 -15   7   3    4.22    1.09
  13  -7  -3    2.37    0.78
 -13  -7   3    2.11    0.83
  13   7  -3    2.14    0.82
 -13   7   3    3.25    0.97
  11  -7  -3   10.11    1.19
 -11  -7   3   10.11    1.20
 -11  -7   3   11.00    0.79
 -11   7   3   11.23    1.44
  11   7  -3    9.69    1.28
  11   7  -3    8.81    0.74
 -11   7   3    9.89    0.69
  -9  -7   3    9.39    1.05
  -9  -7   3    6.56    0.70
   9  -7  -3    7.95    0.96
   9  -7  -3    5.09    0.80
  -9   7   3    6.90    1.06
   9   7  -3    7.26    0.71
  -9   7   3    7.98    0.74
   9   7  -3    8.53    1.10
   7  -7  -3    0.31    0.25
   7  -7  -3   -0.05    0.33
  -7  -7   3    0.08    0.36
  -7   7   3    0.12    0.50
  -7   7   3    0.14    0.34
   7   7  -3    0.21    0.33
  -5  -7   3    2.76    0.48
  -5  -7   3    2.13    0.57
   5  -7  -3    2.20    0.41
   5  -7  -3    2.91    0.48
   5   7  -3    3.12    0.53
  -5   7   3    2.73    0.48
   5   7  -3    2.90    0.48
  -5   7   3    2.84    0.64
  -5   7   3    1.64    0.47
  -3  -7   3   37.55    1.31
   3  -7  -3   38.31    1.34
   3  -7  -3   39.06    1.76
  -3  -7   3   34.70    1.63
   3   7  -3   37.88    1.55
   3   7  -3   37.59    1.30
  -3   7   3   36.05    1.59
   1  -7  -3   14.57    0.60
  -1  -7   3   15.41    1.07
   1  -7  -3   16.55    0.64
   1  -7  -3   16.19    1.15
  -1   7   3   16.06    1.06
   1   7  -3   15.18    1.02
  -1  -7  -3    8.32    0.91
   1  -7   3    6.40    0.83
   1   7   3    5.77    0.74
  -1   7  -3    7.36    0.83
   3  -7   3   36.54    1.71
  -3  -7  -3   38.38    1.76
   3   7   3   37.19    1.71
  -3   7  -3   38.92    1.66
   5  -7   3    1.24    0.53
  -5  -7  -3    1.96    0.29
   5  -7   3    0.74    0.28
  -5  -7  -3    1.19    0.52
  -5   7  -3    0.58    0.42
   5   7   3    1.00    0.46
   5   7   3    1.90    0.31
  -5   7  -3    1.42    0.32
  -7  -7  -3   13.42    1.28
  -7  -7  -3   10.24    1.08
   7  -7   3   10.61    1.18
   7  -7   3   10.07    0.78
  -7   7  -3   12.19    0.83
   7   7   3   10.45    0.73
  -7   7  -3   11.18    1.03
   7   7   3   11.66    1.17
   9  -7   3    7.75    1.05
  -9  -7  -3   11.44    1.31
  -9   7  -3   10.59    0.99
  -9   7  -3    8.70    0.96
   9   7   3   10.93    1.20
   9   7   3   11.60    0.90
  11  -7   3   -0.12    0.61
 -11  -7  -3    0.23    0.65
  11   7   3    0.45    0.55
 -11   7  -3   -0.25    0.48
  11   7   3    0.33    0.45
 -13  -7  -3    1.50    0.85
  13  -7   3    1.72    1.30
  13   7   3    0.06    0.45
 -13   7  -3   -0.64    0.60
  13   7   3    0.24    0.53
 -15  -7  -3    7.63    1.37
  15  -7   3    5.29    1.20
  15   7   3    6.19    1.01
 -15   7  -3    7.33    1.02
  15   7   3    7.63    1.05
 -15   7  -3   11.78    1.46
  16  -8  -3    4.22    1.08
 -16  -8   3    4.07    1.05
 -16   8   3    3.31    1.12
  16   8  -3    4.18    1.10
  14  -8  -3   -0.03    0.67
 -14  -8   3    0.19    0.76
 -14   8   3   -0.27    0.65
  14   8  -3    0.70    0.69
  12  -8  -3    2.24    0.78
 -12  -8   3    2.74    0.49
 -12  -8   3    1.92    0.76
  12   8  -3    2.06    0.48
  12   8  -3    0.70    0.65
 -12   8   3    1.45    0.81
 -10  -8   3    7.38    1.03
  10  -8  -3    5.68    0.57
  10  -8  -3    6.43    0.94
 -10   8   3    6.26    0.69
 -10   8   3    4.93    0.99
  10   8  -3    6.36    1.03
  10   8  -3    7.43    0.76
   8  -8  -3    7.81    0.64
  -8  -8   3    9.93    1.01
   8  -8  -3   11.11    1.07
  -8   8   3    8.52    1.14
  -8   8   3    8.11    0.81
   8   8  -3    9.09    0.83
   8   8  -3    8.59    1.09
  -6  -8   3    3.90    0.61
  -6  -8   3    4.87    0.79
   6  -8  -3    4.12    0.63
   6   8  -3    4.03    0.60
  -6   8   3    4.48    0.63
   4  -8  -3    7.62    0.96
  -4  -8   3    7.80    0.65
  -4  -8   3    7.83    0.91
   4  -8  -3    7.68    0.60
   4   8  -3    6.88    0.73
   4   8  -3    8.04    0.64
  -4   8   3    9.14    0.90
  -2  -8   3    1.19    0.44
   2  -8  -3    0.43    0.22
   2  -8  -3    0.48    0.48
   2  -8  -3    0.51    0.23
  -2  -8   3    1.24    0.26
   2   8  -3    0.95    0.28
  -2   8   3    1.12    0.45
   2   8  -3    0.96    0.44
   0  -8  -3    3.36    0.66
   0  -8   3    3.96    0.67
   0   8   3    3.47    0.62
   0   8  -3    4.20    0.64
   2  -8   3   -0.33    0.34
  -2  -8  -3    0.36    0.45
   2   8   3    0.12    0.36
  -2   8  -3   -0.36    0.35
  -4  -8  -3    4.66    0.75
   4  -8   3    3.55    0.67
   4   8   3    5.43    0.81
  -4   8  -3    4.75    0.72
  -6  -8  -3   33.11    1.78
   6  -8   3   30.20    1.22
  -6  -8  -3   29.62    1.11
   6  -8   3   30.45    1.68
  -6   8  -3   31.49    1.24
   6   8   3   32.26    1.15
  -6   8  -3   31.06    1.54
   6   8   3   31.46    1.66
   8  -8   3    0.49    0.58
  -8  -8  -3    0.40    0.58
   8  -8   3    0.44    0.41
  -8  -8  -3    0.58    0.33
   8   8   3    0.92    0.40
  -8   8  -3    0.53    0.45
  -8   8  -3    0.94    0.55
 -10  -8  -3    1.23    0.74
  10  -8   3    0.62    0.61
 -10   8  -3    3.23    1.10
  10   8   3    3.10    0.77
  10   8   3    2.07    0.56
 -10   8  -3    1.78    0.60
  12  -8   3    0.23    0.60
 -12  -8  -3    1.40    0.82
  12   8   3    0.79    0.59
  12   8   3    0.71    0.52
 -12   8  -3    0.71    0.58
 -12   8  -3    0.56    0.64
  14  -8   3    0.00    0.66
 -14  -8  -3    0.66    0.79
  14   8   3    0.13    0.59
 -14   8  -3    0.66    0.55
  14   8   3    0.71    0.59
 -14   8  -3    0.44    0.80
  15  -9  -3    0.59    0.76
 -15  -9   3    2.19    0.93
 -15   9   3   -0.29    0.74
  15   9  -3    1.54    0.84
  13  -9  -3    1.11    0.69
 -13  -9   3    0.42    0.62
  13   9  -3    0.45    0.40
 -13   9   3   -0.10    0.75
  13   9  -3    0.07    0.67
 -11  -9   3    9.48    1.19
  11  -9  -3   15.02    1.30
  11  -9  -3   11.88    0.76
 -11   9   3   14.80    0.95
  11   9  -3   11.16    1.36
  11   9  -3   13.56    0.96
 -11   9   3   11.93    1.47
   9  -9  -3   -0.20    0.47
  -9  -9   3    0.00    0.50
  -9   9   3   -0.12    0.43
   9   9  -3   -0.13    0.50
  -9   9   3    0.12    0.65
   9   9  -3   -0.20    0.40
  -7  -9   3    6.18    0.93
  -7  -9   3    7.09    0.85
   7  -9  -3    7.25    0.84
  -7   9   3    4.99    0.90
  -7   9   3    4.51    0.68
   7   9  -3    5.32    0.70
  -5  -9   3    4.35    0.74
   5  -9  -3    3.96    0.56
  -5  -9   3    4.78    0.61
   5   9  -3    2.55    0.52
  -5   9   3    4.09    0.57
  -5   9   3    2.81    0.58
   5   9  -3    4.83    0.68
  -3  -9   3    2.45    0.59
   3  -9  -3    3.25    0.68
   3  -9  -3    2.52    0.45
  -3  -9   3    2.78    0.41
   3   9  -3    3.20    0.58
  -3   9   3    1.65    0.49
   3   9  -3    2.61    0.40
  -1  -9   3   15.92    1.11
   1  -9  -3   15.29    1.17
   1   9  -3   17.91    1.08
  -1   9   3   16.30    1.12
   1  -9   3    1.01    0.48
  -1  -9  -3    1.39    0.53
   1   9   3    0.58    0.44
  -1   9  -3    0.92    0.42
   3  -9   3    1.08    0.51
  -3  -9  -3    0.92    0.52
   3   9   3    1.19    0.46
  -3   9  -3    0.79    0.44
   5  -9   3    5.76    0.90
  -5  -9  -3    7.69    1.08
   5  -9   3    5.77    0.50
  -5   9  -3    5.93    0.81
   5   9   3    5.94    0.83
   7  -9   3    1.45    0.42
  -7  -9  -3    2.48    0.75
   7  -9   3    1.63    0.66
  -7   9  -3    1.70    0.48
   7   9   3    2.24    0.42
  -7   9  -3    2.43    0.63
   7   9   3    2.24    0.64
  -9  -9  -3    5.56    1.01
   9  -9   3    6.69    1.10
   9   9   3    7.03    0.77
   9   9   3    5.32    0.93
  -9   9  -3    6.81    0.89
  -9   9  -3    8.57    0.90
 -11  -9  -3    0.31    0.73
  11  -9   3    0.79    0.67
  11   9   3    0.72    0.48
 -11   9  -3    1.36    0.60
  11   9   3    0.35    0.57
 -13  -9  -3    3.05    0.96
  13  -9   3    2.20    0.90
 -13   9  -3    2.67    0.70
  13   9   3    2.88    0.79
 -13   9  -3    4.23    0.93
  13   9   3    4.51    0.79
  15  -9   3    0.25    0.81
 -15  -9  -3    0.56    0.75
  15   9   3    0.33    0.53
 -15   9  -3    0.67    0.60
  15   9   3   -0.54    0.56
 -15   9  -3    0.35    0.81
 -14 -10   3    0.82    0.70
  14 -10  -3    1.19    0.71
 -14  10   3    0.78    0.86
  14  10  -3   -0.77    0.54
  14  10  -3    0.05    0.40
  12 -10  -3    0.53    0.31
 -12 -10   3    0.28    0.57
  12 -10  -3    0.17    0.60
 -12  10   3   -0.92    0.62
  12  10  -3    1.54    0.75
  12  10  -3    0.16    0.44
 -12  10   3    0.09    0.38
  10 -10  -3    8.99    1.08
 -10 -10   3    9.21    1.17
  10  10  -3   10.73    0.99
 -10  10   3   10.74    0.98
  10  10  -3    8.47    1.21
 -10  10   3    7.26    1.19
  -8 -10   3    4.68    0.80
   8 -10  -3    5.54    0.81
  -8  10   3    3.95    0.89
   8  10  -3    4.01    0.68
  -8  10   3    5.26    0.77
  -6 -10   3   35.31    1.83
   6 -10  -3   36.07    1.54
  -6 -10   3   34.96    1.60
   6  10  -3   35.86    1.61
  -6  10   3   36.64    1.71
   4 -10  -3    2.81    0.44
  -4 -10   3    1.85    0.44
  -4 -10   3    1.82    0.58
   4  10  -3    1.74    0.56
  -4  10   3    2.94    0.60
   4  10  -3    2.07    0.55
   2 -10  -3   -0.26    0.19
  -2 -10   3    0.18    0.22
   2 -10  -3   -0.35    0.42
  -2 -10   3   -0.15    0.35
  -2  10   3   -0.11    0.35
   2  10  -3   -0.66    0.34
   2  10  -3   -0.13    0.25
   0 -10   3   12.27    1.03
   0 -10  -3   13.30    1.15
   0  10  -3   12.78    0.99
   0  10   3   13.08    1.06
  -2 -10  -3    0.71    0.52
   2 -10   3    1.42    0.54
   2  10   3    1.41    0.50
  -2  10  -3    1.93    0.56
   4 -10   3    6.18    0.92
  -4 -10  -3    6.48    0.96
  -4  10  -3    6.37    0.85
   6 -10   3    2.45    0.43
  -6 -10  -3    4.73    0.89
   6 -10   3    2.01    0.69
  -6  10  -3    3.05    0.71
   6  10   3    2.38    0.69
  -6  10  -3    2.72    0.48
  -8 -10  -3    7.30    1.10
   8 -10   3    8.31    1.16
   8 -10   3    8.34    0.80
  -8  10  -3    8.94    1.01
  -8  10  -3   10.10    0.92
   8  10   3    8.27    1.09
   8  10   3    7.66    0.66
   8  10   3    7.88    0.71
  10 -10   3    0.15    0.67
 -10 -10  -3   -0.07    0.64
  10  10   3    0.51    0.56
 -10  10  -3   -0.09    0.55
  10  10   3    0.47    0.40
 -10  10  -3    0.78    0.56
 -12 -10  -3    0.41    0.76
  12 -10   3    0.12    0.60
 -12  10  -3    1.01    0.63
  12  10   3    0.07    0.56
 -12  10  -3   -0.77    0.54
 -14 -10  -3    2.61    1.03
  14 -10   3    3.01    0.98
 -14  10  -3    3.22    0.91
 -14  10  -3    1.86    0.72
  14  10   3    2.15    0.82
  14  10   3    1.49    0.63
 -13 -11   3    0.80    0.59
  13 -11  -3    0.33    0.63
 -13  11   3   -0.32    0.71
  13  11  -3   -0.32    0.44
 -13  11   3   -0.21    0.37
  13  11  -3   -0.76    0.59
 -11 -11   3   10.51    1.27
  11 -11  -3   11.25    1.27
 -11  11   3   11.95    1.01
  11  11  -3   12.94    1.46
  11  11  -3   12.56    1.06
 -11  11   3   12.49    1.51
   9 -11  -3    0.30    0.49
  -9 -11   3    0.72    0.57
  -9  11   3   -0.41    0.65
   9  11  -3   -0.66    0.43
  -9  11   3    0.14    0.46
   9  11  -3    0.35    0.61
  -7 -11   3    1.35    0.63
   7 -11  -3    3.72    0.66
  -7 -11   3    3.25    0.66
  -7  11   3    3.19    0.88
  -7  11   3    2.96    0.69
   7  11  -3    3.20    0.66
  -5 -11   3   31.25    1.43
  -5 -11   3   31.05    1.68
   5 -11  -3   33.21    1.92
   5 -11  -3   31.64    1.35
   5  11  -3   30.83    1.42
  -5  11   3   31.56    1.63
   5  11  -3   30.50    1.55
  -5  11   3   30.49    1.36
  -3 -11   3    2.71    0.44
  -3 -11   3    3.01    0.71
   3 -11  -3    2.83    0.71
  -3  11   3    2.76    0.41
   3  11  -3    2.16    0.61
   3  11  -3    2.45    0.45
  -3  11   3    2.30    0.59
  -1 -11   3    0.20    0.45
   1  11  -3    0.50    0.50
  -1  11   3    0.58    0.41
   1 -11   3    1.81    0.58
  -3 -11  -3   -0.14    0.50
   3 -11   3    0.03    0.47
  -3  11  -3   -0.90    0.40
   3  11   3   -0.61    0.36
   5 -11   3    3.90    0.87
   5 -11   3    4.32    0.45
  -5 -11  -3    3.57    0.82
  -5  11  -3    2.98    0.73
   5  11   3    4.54    0.84
   7 -11   3    4.33    0.57
  -7 -11  -3    5.60    1.02
   7 -11   3    4.78    0.95
  -7  11  -3    5.60    0.67
   7  11   3    3.61    0.81
   7  11   3    4.30    0.49
  -7  11  -3    4.93    0.88
   7  11   3    5.32    0.50
   9 -11   3   20.82    1.66
  -9 -11  -3   23.65    1.80
  -9  11  -3   22.86    1.34
   9  11   3   21.19    1.11
  -9  11  -3   21.98    1.45
   9  11   3   22.30    1.12
   9  11   3   20.61    1.59
  11 -11   3    0.79    0.87
 -11 -11  -3    0.14    0.71
  11  11   3    0.65    0.46
 -11  11  -3   -0.22    1.09
  11  11   3   -0.76    0.53
 -11  11  -3    0.78    0.61
  13 -11   3   -0.89    0.63
 -13 -11  -3   -0.26    0.68
 -13  11  -3    0.85    0.70
 -13  11  -3   -0.79    0.51
  13  11   3   -0.12    0.43
  13  11   3   -0.04    0.60
 -14 -12   3   -0.06    0.57
  14 -12  -3    0.91    0.80
  14  12  -3    0.52    0.75
  14  12  -3   -0.23    0.64
 -14  12   3    1.53    0.91
 -12 -12   3    0.94    0.66
  12 -12  -3    0.30    0.60
 -12  12   3    1.90    0.89
 -12  12   3    0.44    0.50
  12  12  -3    0.36    0.70
  12  12  -3   -0.34    0.47
  10 -12  -3    3.98    0.83
 -10 -12   3    4.00    0.85
  10  12  -3    3.95    0.93
 -10  12   3    3.71    1.03
  10  12  -3    4.10    0.74
 -10  12   3    3.81    0.74
  -8 -12   3    0.54    0.61
  -8  12   3    0.08    0.68
  -8  12   3   -0.62    0.46
   8  12  -3    1.15    0.58
   6 -12  -3   32.70    2.02
   6 -12  -3   33.02    1.50
  -6 -12   3   34.03    1.61
  -6 -12   3   36.34    1.88
  -6  12   3   33.65    1.76
   6  12  -3   33.48    1.66
  -4 -12   3   18.46    1.02
   4 -12  -3   19.79    1.55
   4 -12  -3   17.18    0.93
  -4 -12   3   17.01    1.29
   4  12  -3   17.47    1.05
  -4  12   3   19.77    2.23
   4  12  -3   16.95    1.24
  -4  12   3   17.38    0.93
   2 -12  -3    9.46    1.15
  -2 -12   3    8.28    1.02
  -2 -12   3    6.55    0.58
   2  12  -3    8.07    0.65
   2  12  -3    6.98    0.87
  -2  12   3    8.29    1.01
   0 -12   3    1.35    0.64
   0 -12  -3   -0.25    0.60
   0  12   3    0.16    0.44
   0  12  -3    0.17    0.48
  -2 -12  -3    4.75    0.89
   2 -12   3    3.75    0.79
   2  12   3    3.17    0.72
  -2  12  -3    3.76    0.73
   4 -12   3    1.56    0.67
  -4 -12  -3    2.32    0.77
   4  12   3    1.75    0.66
  -4  12  -3    1.38    0.59
   6 -12   3    2.69    0.80
  -6 -12  -3    3.41    0.87
   6 -12   3    1.95    0.42
   6 -12   3    2.50    0.51
  -6  12  -3    2.96    0.74
   6  12   3    3.56    0.80
   8 -12   3    3.76    0.95
  -8 -12  -3    3.54    0.93
   8  12   3    4.12    0.50
   8  12   3    4.45    0.53
  -8  12  -3    5.58    0.90
  -8  12  -3    5.11    0.73
   8  12   3    5.06    1.00
 -10 -12  -3    7.66    1.27
  10 -12   3    8.52    1.32
 -10  12  -3    7.92    0.95
  10  12   3    7.27    1.14
 -10  12  -3    7.29    0.98
  10  12   3    6.93    0.74
 -12 -12  -3    1.09    0.78
  12 -12   3    0.03    0.74
 -12  12  -3    0.07    0.60
 -12  12  -3   -0.58    0.54
  12  12   3    0.54    0.45
  12  12   3   -0.04    0.64
  14 -12   3   -0.98    0.72
 -14 -12  -3   -0.23    0.77
 -14  12  -3   -0.53    0.61
  14  12   3    0.35    0.69
  14  12   3   -0.22    0.44
 -14  12  -3    0.22    0.65
 -13 -13   3    0.27    0.70
  13 -13  -3    0.55    0.69
 -13  13   3    1.06    0.55
 -13  13   3   -0.07    0.77
  13  13  -3   -0.17    0.51
  13  13  -3    0.87    0.74
  11 -13  -3    2.95    0.79
 -11 -13   3    1.67    0.72
  11  13  -3    2.64    0.84
  11  13  -3    3.17    0.77
 -11  13   3    1.95    0.63
 -11  13   3    3.06    1.03
  -9 -13   3    1.28    0.58
   9 -13  -3    2.95    0.74
   9  13  -3    1.50    0.63
   9  13  -3    1.37    0.74
   7 -13  -3    2.26    0.61
   7 -13  -3    3.31    0.93
  -7 -13   3    2.61    0.74
  -7 -13   3    1.83    0.61
   7  13  -3    2.10    0.68
  -7  13   3    1.11    0.56
  -5 -13   3   12.15    0.95
   5 -13  -3   12.53    0.87
   5 -13  -3   10.32    1.32
  -5 -13   3   13.09    1.31
  -5  13   3   10.60    1.19
   5  13  -3   11.09    1.10
  -5  13   3   13.14    1.45
  -3 -13   3    9.91    1.15
   3 -13  -3   10.76    1.28
   3 -13  -3    9.65    0.73
  -3 -13   3    9.49    0.75
   3  13  -3   10.62    1.11
  -3  13   3    9.53    1.10
  -3  13   3    9.33    0.65
   3  13  -3    7.26    0.75
   1 -13  -3   -0.10    0.58
  -1 -13   3   -0.58    0.44
  -1 -13   3    0.19    0.27
   1  13  -3    0.72    0.55
  -1  13   3    0.53    0.50
   1 -13   3    0.84    0.59
  -1 -13  -3    0.70    0.69
  -1  13  -3    0.60    0.55
   1  13   3    0.39    0.48
   3 -13   3    0.21    0.59
  -3 -13  -3   -0.40    0.58
   3  13   3    0.16    0.49
  -3  13  -3    0.13    0.55
   5 -13   3    0.94    0.65
  -5 -13  -3    1.24    0.71
   5 -13   3    0.77    0.32
  -5  13  -3    1.28    0.68
   5  13   3    0.49    0.58
  -7 -13  -3    8.03    1.22
   7 -13   3    7.65    0.74
   7 -13   3    7.39    1.16
   7  13   3    7.87    1.13
  -7  13  -3    8.54    1.09
   9 -13   3    0.13    0.71
  -9 -13  -3    0.23    0.65
  -9  13  -3    0.23    0.53
   9  13   3    0.55    0.35
   9  13   3    0.40    0.64
  -9  13  -3   -0.08    0.63
   9  13   3    0.44    0.39
  11 -13   3    0.09    0.71
 -11 -13  -3    0.76    0.73
  11  13   3    0.24    0.42
 -11  13  -3    0.16    0.66
  11  13   3   -0.15    0.63
 -11  13  -3   -0.22    0.61
  13 -13   3    2.26    0.92
 -13 -13  -3    0.40    0.88
  13  13   3    0.52    0.49
 -13  13  -3    0.86    0.73
  13  13   3    1.77    0.84
 -13  13  -3    0.47    0.67
 -12 -14   3    2.54    0.86
  12 -14  -3    2.89    0.82
 -12  14   3    1.71    0.97
  12  14  -3    1.45    0.67
  12  14  -3    3.78    1.04
 -10 -14   3    0.14    0.56
  10 -14  -3   -0.16    0.54
 -10  14   3    0.24    0.52
  10  14  -3    0.22    0.62
  10  14  -3    0.99    0.59
   8 -14  -3    4.40    0.79
   8 -14  -3    1.61    0.91
  -8 -14   3    4.03    0.89
  -8 -14   3    4.34    0.83
  -8  14   3    2.61    0.73
   8  14  -3    3.83    0.81
   6 -14  -3   -0.66    0.62
  -6 -14   3    0.54    0.53
   6 -14  -3    0.58    0.49
  -6 -14   3   -0.26    0.39
  -6  14   3    0.31    0.50
   6  14  -3   -0.36    0.48
   4 -14  -3    4.42    0.59
  -4 -14   3    3.87    0.62
   4 -14  -3    4.63    0.97
  -4 -14   3    4.78    0.91
  -4  14   3    3.49    0.79
   4  14  -3    4.32    0.87
   4  14  -3    2.78    0.70
  -4  14   3    3.71    0.55
  -2 -14   3    1.65    0.43
  -2 -14   3    3.33    0.84
   2 -14  -3    2.93    0.90
   2  14  -3    2.78    0.72
   2  14  -3    1.50    0.47
  -2  14   3    2.32    0.71
   0 -14  -3    1.02    0.69
   0 -14   3    1.04    0.61
   0  14  -3    1.18    0.63
   0  14   3    0.33    0.51
  -2 -14  -3    1.17    0.75
   2 -14   3    1.28    0.69
  -2  14  -3    0.76    0.59
   2  14   3    1.87    0.69
   4 -14   3    1.64    0.76
  -4 -14  -3    0.63    0.72
   4  14   3    1.00    0.59
  -4  14  -3   -0.06    0.58
  -6 -14  -3    1.11    0.77
   6 -14   3    0.79    0.44
   6 -14   3    0.59    0.68
   6  14   3    0.49    0.60
  -6  14  -3    0.67    0.63
  -8 -14  -3    8.62    1.29
   8 -14   3    6.07    1.13
  -8  14  -3    6.12    1.04
   8  14   3    5.05    1.03
  10 -14   3   -0.30    0.71
 -10 -14  -3    0.37    0.71
 -10  14  -3    0.96    0.62
  10  14   3    1.26    0.73
  10  14   3    0.62    0.37
 -10  14  -3    0.87    0.66
 -12 -14  -3    4.37    1.12
  12 -14   3    3.33    1.07
 -12  14  -3    2.55    0.79
  12  14   3    2.51    0.57
  12  14   3    2.92    0.95
 -12  14  -3    2.23    0.80
 -11 -15   3    1.72    0.68
  11 -15  -3    2.78    0.84
  11  15  -3    1.54    0.69
  11  15  -3    1.01    0.77
 -11  15   3    1.83    0.71
  -9 -15   3   -0.08    0.50
   9 -15  -3    1.09    0.63
   9 -15  -3    0.92    0.88
   9  15  -3    0.71    0.63
  -9  15   3    1.35    0.63
   9  15  -3    1.19    0.73
   7 -15  -3    0.04    0.50
   7 -15  -3    0.78    0.80
  -7 -15   3    0.41    0.60
  -7  15   3    0.99    0.64
   7  15  -3    0.37    0.61
   5 -15  -3    3.22    0.95
   5 -15  -3    2.88    0.60
  -5 -15   3    2.33    0.73
  -5 -15   3    3.03    0.59
  -5  15   3    4.90    0.94
   5  15  -3    3.22    0.81
  -3 -15   3    0.09    0.40
  -3 -15   3   -0.60    0.51
   3 -15  -3   -1.11    0.61
   3 -15  -3   -0.17    0.33
  -3  15   3    0.04    0.30
  -3  15   3   -0.26    0.51
   3  15  -3    0.12    0.47
   3  15  -3    0.17    0.53
  -1 -15   3   11.29    0.77
  -1 -15   3    9.86    0.70
   1 -15  -3   10.08    1.33
  -1 -15   3   11.97    1.32
  -1  15   3   12.42    1.36
   1  15  -3   11.24    1.19
  -1 -15  -3   14.38    1.50
   1 -15   3   17.70    1.46
  -1  15  -3   17.20    1.37
   1  15   3   12.45    1.36
  -3 -15  -3    0.42    0.72
   3 -15   3    0.23    0.63
   3  15   3    0.39    0.60
  -3  15  -3    0.04    0.59
  -5 -15  -3    9.86    1.37
   5 -15   3   10.30    1.34
  -5  15  -3   10.10    1.21
   5  15   3    9.59    1.30
   7 -15   3    4.76    1.06
   7 -15   3    4.94    0.61
  -7 -15  -3    5.32    1.14
   7 -15   3    6.08    0.73
   7  15   3    4.54    1.01
  -7  15  -3    6.43    1.06
   9 -15   3    3.15    0.99
   9 -15   3    2.93    0.67
  -9 -15  -3    3.18    0.98
   9  15   3    1.12    0.72
  -9  15  -3    2.92    0.82
  11 -15   3    8.83    1.52
 -11 -15  -3    7.53    1.38
  11  15   3    9.82    0.82
 -11  15  -3   10.26    1.12
 -11  15  -3   10.79    1.27
  10 -16  -3    0.56    0.62
  10 -16  -3   -0.02    0.81
 -10 -16   3    0.48    0.57
  10  16  -3    0.45    0.80
  10  16  -3   -0.20    0.60
 -10  16   3    0.57    0.64
  -8 -16   3    0.56    0.60
   8 -16  -3    1.06    0.64
  -8 -16   3    0.22    0.52
   8 -16  -3   -0.03    0.79
   8  16  -3    0.10    0.61
  -8  16   3   -0.85    0.50
   6 -16  -3    0.33    0.46
  -6 -16   3   -0.90    0.50
   6 -16  -3    0.69    0.80
  -6 -16   3   -0.08    0.43
  -6  16   3    0.53    0.63
   6  16  -3   -0.16    0.54
  -4 -16   3    1.34    0.68
   4 -16  -3    0.91    0.45
   4 -16  -3   -0.12    0.70
  -4 -16   3   -0.19    0.40
  -4  16   3    0.42    0.37
  -4  16   3    0.08    0.61
   4  16  -3    0.46    0.60
  -2 -16   3   26.69    1.74
   2 -16  -3   31.13    2.04
  -2 -16   3   27.46    1.29
   2  16  -3   27.27    1.71
  -2  16   3   25.09    1.78
   0 -16  -3    0.88    0.80
   0 -16   3    1.11    0.70
   0 -16   3    0.12    0.34
   0  16  -3    0.61    0.61
   0  16   3   -0.22    0.54
   2 -16   3    0.18    0.59
  -2 -16  -3    0.01    0.65
  -2  16  -3    0.06    0.59
   2  16   3    0.89    0.68
  -4 -16  -3    0.78    0.72
   4 -16   3    3.26    0.94
  -4  16  -3    0.58    0.67
   4  16   3    0.50    0.61
   6 -16   3    0.12    0.66
   6 -16   3    0.88    0.38
   6 -16   3   -0.56    0.41
  -6 -16  -3   -1.29    0.62
  -6  16  -3    1.57    0.76
   6  16   3   -0.35    0.60
   8 -16   3    1.77    0.59
  -8 -16  -3    4.05    1.04
   8 -16   3    1.98    1.01
  -8  16  -3    2.06    0.79
   8  16   3    1.32    0.80
 -10 -16  -3    5.15    1.18
  10 -16   3    3.90    1.09
  10 -16   3    5.89    0.89
 -10  16  -3    4.19    0.94
  10  16   3    5.51    1.18
  11 -17  -3   -0.71    0.86
 -11 -17   3    0.67    0.68
  11 -17  -3    0.83    0.69
  11  17  -3    0.13    0.73
 -11  17   3    0.38    0.67
  11  17  -3    0.07    0.66
   9 -17  -3    2.16    1.08
   9 -17  -3    3.31    0.86
  -9 -17   3    3.51    0.80
   9  17  -3    5.12    1.06
   9  17  -3    1.34    0.75
  -9  17   3    2.80    0.83
  -7 -17   3   -0.29    0.47
  -7 -17   3    0.05    0.55
   7 -17  -3    0.39    0.84
   7  17  -3   -0.54    0.56
  -7  17   3   -1.24    0.46
   5 -17  -3    0.37    0.77
  -5 -17   3   -0.47    0.49
   5 -17  -3   -0.09    0.44
  -5 -17   3   -0.07    0.42
   5  17  -3    1.04    0.63
  -5  17   3   -0.10    0.58
   3 -17  -3    7.51    1.23
   3 -17  -3    5.37    0.61
  -3 -17   3    7.83    1.14
  -3 -17   3    7.15    0.80
  -3  17   3    5.54    0.59
   3  17  -3    6.17    1.03
  -3  17   3    4.79    0.97
  -1 -17   3    1.81    0.46
   1 -17  -3    1.56    0.85
  -1 -17   3    2.18    0.78
  -1 -17   3    2.07    0.49
  -1  17   3    1.59    0.74
   1  17  -3    1.72    0.72
   1 -17   3    0.07    0.66
  -1 -17  -3   -0.73    0.61
  -1  17  -3    0.05    0.56
   1  17   3    0.08    0.59
  -3 -17  -3   -0.39    0.68
   3 -17   3    0.00    0.67
  -3  17  -3    0.90    0.70
   3  17   3    0.16    0.62
   5 -17   3    0.18    0.70
  -5 -17  -3    0.22    0.74
   5  17   3   -0.01    0.59
  -5  17  -3   -0.20    0.57
   7 -17   3    2.12    0.59
  -7 -17  -3    2.77    0.99
   7  17   3    1.03    0.83
  -7  17  -3    2.21    0.84
  -9 -17  -3    2.16    0.96
   9 -17   3    2.36    0.96
   9 -17   3    1.89    0.67
   9  17   3    1.47    0.82
  10 -18  -3    0.09    0.64
 -10 -18   3    0.11    0.59
  10 -18  -3   -0.70    0.81
 -10  18   3    1.57    0.77
  10  18  -3    0.56    0.71
  10  18  -3    0.49    0.68
  -8 -18   3    3.83    0.81
   8 -18  -3    2.48    1.01
   8 -18  -3    4.14    0.86
  -8  18   3    3.32    0.88
  -6 -18   3    0.41    0.63
   6 -18  -3    0.01    0.49
  -6 -18   3    0.29    0.49
   6  18  -3    0.33    0.66
  -6  18   3   -0.51    0.56
  -4 -18   3    0.12    0.58
   4 -18  -3   -0.61    0.38
   4 -18  -3    0.77    0.82
  -4 -18   3    0.06    0.44
   4  18  -3    0.66    0.67
  -4  18   3    0.69    0.39
  -4  18   3   -0.48    0.55
   2 -18  -3   -0.19    0.74
  -2 -18   3    0.13    0.43
  -2 -18   3   -0.74    0.55
   2  18  -3   -0.39    0.55
  -2  18   3    0.31    0.64
   0 -18  -3    1.98    0.92
   0 -18   3    0.96    0.69
   0 -18   3    1.84    0.48
   0 -18   3    1.86    0.45
   0  18  -3    0.71    0.72
   0  18   3    0.58    0.69
   2 -18   3   -0.38    0.62
  -2 -18  -3   -0.59    0.71
   2  18   3   -0.23    0.57
  -2  18  -3    0.35    0.63
  -4 -18  -3    0.92    0.88
   4 -18   3    1.90    0.88
  -4  18  -3    0.95    0.90
   4  18   3    0.22    0.75
  -6 -18  -3   -0.78    0.65
   6 -18   3    0.05    0.99
   6 -18   3    0.01    0.45
  -6  18  -3   -0.38    0.66
   6  18   3    0.80    0.71
   8 -18   3    1.20    0.55
  -8 -18  -3    1.75    0.98
   8 -18   3    0.20    0.79
   8  18   3    1.33    0.85
  -8  18  -3    0.72    0.77
  -7 -19   3    0.73    0.73
   7 -19  -3    0.17    0.57
  -7 -19   3    0.76    0.59
   7 -19  -3    0.92    0.90
   7  19  -3   -0.09    0.62
  -7  19   3    0.73    0.78
  -5 -19   3    0.46    0.60
   5 -19  -3    0.38    0.47
   5 -19  -3    0.60    0.79
   5  19  -3   -0.13    0.64
  -5  19   3    0.65    0.79
  -3 -19   3   -0.29    0.41
  -3 -19   3    0.87    0.67
   3 -19  -3   -0.71    0.84
   3  19  -3    0.90    0.71
  -1 -19   3    8.39    1.20
   1 -19  -3   10.45    1.46
  -1 -19   3    6.40    0.75
  -1  19   3    5.61    1.25
   1  19  -3    7.10    1.16
   1 -19   3    0.50    0.40
   1 -19   3    1.09    0.75
  -1 -19  -3    1.72    0.89
   1  19   3   -0.31    0.62
  -1  19  -3    1.19    0.73
   3 -19   3    2.73    0.91
  -3 -19  -3    1.59    0.94
   3  19   3    1.06    0.75
  -3  19  -3    1.20    0.75
  -5 -19  -3   -1.26    0.60
   5 -19   3    1.87    0.94
   5  19   3   -0.95    0.51
  -5  19  -3    0.55    0.70
   7 -19   3    0.76    0.54
  -7 -19  -3    1.59    0.94
   7 -19   3    0.54    0.85
   7  19   3    0.72    0.75
  -7  19  -3    1.12    0.81
   6 -20  -3    1.00    0.56
  -6 -20   3    0.80    0.57
   6 -20  -3    1.75    0.90
  -6  20   3    0.15    0.70
   6  20  -3   -0.96    0.56
   4 -20  -3   -0.36    0.81
   4 -20  -3    0.06    0.45
  -4 -20   3    0.29    0.61
  -4 -20   3   -0.74    0.43
  -4  20   3    1.52    0.87
   4  20  -3   -0.69    0.67
  -2 -20   3   -0.06    0.66
   2 -20  -3   -0.10    0.76
  -2 -20   3    1.51    0.53
   2  20  -3    1.19    0.76
  -2  20   3    1.00    0.75
   0 -20  -3    0.31    0.78
   0 -20   3    0.07    0.44
   0 -20   3   -0.01    0.66
   0  20   3   -0.68    0.56
   0  20  -3   -0.04    0.64
   2 -20   3    0.87    0.76
  -2 -20  -3   -0.23    0.77
  -2  20  -3   -0.69    0.64
   2  20   3    0.50    0.72
   4 -20   3   -0.10    0.69
  -4 -20  -3    1.37    0.89
   4  20   3   -0.46    0.62
  -4  20  -3    0.26    0.78
  -6 -20  -3   -0.06    0.76
   6 -20   3   -1.18    0.70
   6  20   3   -0.25    0.65
  -6  20  -3    0.47    0.77
  -5 -21   3    0.33    0.54
   5 -21  -3   -1.02    0.47
  -5 -21   3    0.40    0.74
   5 -21  -3   -1.31    0.80
   5  21  -3   -0.76    0.68
  -5  21   3    1.12    0.80
  -3 -21   3   -0.42    0.43
   3 -21  -3    0.33    0.82
  -3  21   3   -0.54    0.66
   3  21  -3    0.51    0.74
   1 -21  -3   -0.49    0.83
  -1 -21   3   -0.35    0.42
  -1 -21   3    0.93    0.96
  -1  21   3   -0.99    0.58
   1  21  -3   -0.22    0.74
  -1 -21  -3   -0.59    0.78
   1 -21   3    0.08    0.78
   1  21   3    1.17    0.81
  -1  21  -3   -1.01    0.56
   3 -21   3    0.52    0.78
  -3 -21  -3   -0.74    0.74
  -3  21  -3   -0.21    0.67
   3  21   3    0.89    0.79
   5 -21   3    0.40    0.77
  -5 -21  -3   -0.70    0.76
   5  21   3   -0.20    0.64
  -5  21  -3   -0.81    0.68
  -2 -22   3    0.29    0.74
   2 -22  -3    0.56    0.90
  -2 -22   3   -0.24    0.48
  -2  22   3   -0.43    0.67
   2  22  -3    0.26    0.78
   0 -22  -3    0.34    0.85
   0 -22   3   -0.21    0.69
   0 -22   3   -0.65    0.40
   0  22  -3   -0.41    0.64
   0  22   3   -0.82    0.62
 -16   0   4    2.82    1.00
  16   0  -4    1.78    0.88
  14   0  -4    7.41    1.21
  12   0  -4   49.47    2.49
 -12   0   4   54.26    2.63
  10   0  -4    1.91    0.70
  10   0  -4    3.79    0.44
  10   0  -4    2.49    0.37
 -10   0   4    1.62    0.71
   8   0  -4   51.31    2.22
  -8   0   4   53.12    2.25
   8   0  -4   48.45    1.94
   8   0  -4   51.76    1.77
   6   0  -4    1.80    0.53
   6   0  -4    1.11    0.38
  -6   0   4    0.85    0.47
   6   0  -4    0.65    0.33
   4   0  -4   52.40    1.93
   4   0  -4   53.49    1.95
  -4   0   4   54.23    2.00
  -4   0   4   53.12    2.03
   4   0  -4   54.38    2.00
  -2   0   4   67.44    2.27
   2   0  -4   63.55    2.22
   2   0  -4   64.17    2.14
   0   0   4   43.01    1.80
   0   0   4   38.52    1.56
   0   0  -4   40.84    1.53
   0   0  -4   39.46    1.48
   0   0  -4   39.48    1.56
  -2   0  -4  124.96    3.57
   2   0   4  124.74    3.56
   2   0   4  126.20    3.70
  -2   0  -4  120.40    3.61
   2   0   4  122.59    3.91
   4   0   4  126.04    3.65
   4   0   4  127.57    3.75
  -4   0  -4  118.04    3.65
  -4   0  -4  126.69    3.66
   4   0   4  124.36    3.99
   6   0   4    3.07    0.61
  -6   0  -4    4.21    0.66
   8   0   4    0.83    0.51
  -8   0  -4    0.80    0.54
  -8   0  -4    0.94    0.54
  10   0   4   18.46    1.40
 -10   0  -4   17.51    1.37
  12   0   4    0.78    0.66
 -12   0  -4    1.95    0.69
 -12   0  -4    1.03    0.71
  14   0   4    7.82    1.27
 -14   0  -4   10.74    1.18
 -14   0  -4   12.49    1.56
 -15  -1   4    0.66    0.68
  15  -1  -4    0.83    0.72
 -15   1   4    1.41    0.84
  15   1  -4    1.82    0.84
  13  -1  -4    0.09    0.60
 -13  -1   4    1.38    0.77
 -13   1   4    0.08    0.61
  13   1  -4   -0.46    0.52
  11  -1  -4   18.18    1.44
 -11  -1   4   18.11    1.50
  11   1  -4   19.65    1.49
 -11   1   4   18.56    1.57
   9  -1  -4   -0.04    0.24
   9  -1  -4   -0.18    0.45
  -9  -1   4   -0.30    0.49
   9  -1  -4    0.13    0.28
   9   1  -4   -0.11    0.29
   9   1  -4    0.02    0.29
  -9   1   4   -0.18    0.53
   9   1  -4   -0.02    0.49
  -7  -1   4    0.65    0.48
   7  -1  -4    0.12    0.28
   7  -1  -4   -0.23    0.35
   7  -1  -4    0.23    0.31
   7   1  -4   -0.02    0.28
   7   1  -4    0.35    0.40
  -7   1   4    0.03    0.46
   7   1  -4    0.12    0.31
   5  -1  -4   10.94    0.78
  -5  -1   4   10.91    0.87
   5  -1  -4   10.67    0.86
  -5  -1   4   10.98    0.91
  -5   1   4   11.23    0.95
   5   1  -4    9.49    0.75
   5   1  -4   10.89    0.82
   3  -1  -4   25.88    1.26
   3  -1  -4   23.36    1.19
  -3  -1   4   24.64    1.18
  -3  -1   4   27.08    1.31
   3  -1  -4   23.79    1.19
   3   1  -4   26.27    1.32
   3   1  -4   25.97    1.28
  -3   1   4   26.23    1.30
  -3   1   4   27.11    1.30
  -3   1   4   27.03    1.26
   3   1  -4   25.88    1.15
   1  -1  -4    9.88    0.83
   1  -1  -4   10.41    0.78
  -1  -1   4    9.06    0.81
   1  -1  -4   11.96    0.81
   1   1  -4   12.06    0.93
  -1   1   4   11.19    0.94
   1   1  -4   12.25    0.86
   1   1  -4    9.93    0.70
   1   1  -4   10.53    0.76
  -1   1   4   11.51    0.79
  -1  -1  -4    8.37    0.77
   1  -1   4    8.81    0.83
  -1  -1  -4    8.82    0.80
   1   1   4    8.07    0.69
  -1   1  -4    7.88    0.79
  -1   1  -4   11.21    0.90
  -1   1  -4    7.83    0.89
   1   1   4    6.83    0.83
  -1   1  -4    8.12    0.65
   3  -1   4   38.22    1.44
   3  -1   4   38.77    1.62
  -3  -1  -4   37.04    1.46
  -3  -1  -4   40.52    1.57
   3   1   4   37.22    1.52
  -3   1  -4   37.72    1.43
  -3   1  -4   36.68    1.68
   3   1   4   38.58    1.52
   3   1   4   39.65    1.79
  -3   1  -4   41.03    1.76
   5  -1   4   20.86    1.20
  -5  -1  -4   22.05    1.18
  -5  -1  -4   20.53    1.14
   5  -1   4   17.94    1.02
   5   1   4   22.56    1.34
   5   1   4   19.25    1.09
  -5   1  -4   18.66    1.04
  -5   1  -4   21.14    1.28
   7  -1   4    2.00    0.58
  -7  -1  -4    3.32    0.67
   7   1   4    2.59    0.58
  -7   1  -4    2.75    0.66
  -7   1  -4    1.98    0.54
   7   1   4    1.03    0.52
   9  -1   4    3.37    0.74
   9   1   4    2.73    0.70
  -9   1  -4    2.78    0.67
  -9   1  -4    3.70    0.77
 -11  -1  -4    1.29    0.66
  11  -1   4   -0.28    0.52
 -11  -1  -4    0.24    0.61
  11   1   4    0.75    0.59
 -11   1  -4    1.05    0.66
 -11   1  -4    0.23    0.58
 -13  -1  -4    0.30    0.55
  13  -1   4   -0.03    0.58
 -13  -1  -4    0.57    0.66
 -13   1  -4    0.85    0.58
  13   1   4   -1.00    0.49
 -13   1  -4    1.29    0.77
  15  -1   4    1.97    0.81
 -15  -1  -4    5.43    1.20
 -15  -1  -4    5.69    0.90
  15   1   4    4.03    0.98
 -15   1  -4    6.34    0.92
 -15   1  -4    3.01    1.12
  16  -2  -4    0.22    0.75
 -16  -2   4   -0.20    0.73
 -16   2   4    0.22    0.75
  16   2  -4    0.22    0.74
  14  -2  -4    0.45    0.65
 -14  -2   4    0.67    1.11
 -14   2   4    0.32    0.65
  14   2  -4    0.51    0.71
  12  -2  -4   12.06    1.37
 -12  -2   4    9.79    1.26
  12   2  -4    8.26    1.20
 -12   2   4    9.45    1.31
  10  -2  -4    1.00    0.28
  10  -2  -4    1.02    0.33
  10  -2  -4   -0.37    0.50
 -10  -2   4    1.64    0.67
  10   2  -4    0.43    0.61
  10   2  -4    1.23    0.36
 -10   2   4    1.04    0.66
  10   2  -4    0.92    0.34
   8  -2  -4   81.10    2.47
  -8  -2   4   81.84    2.91
   8   2  -4   78.85    2.97
   8   2  -4   74.68    2.52
   8   2  -4   77.76    2.42
  -8   2   4   75.62    2.95
  -6  -2   4    0.85    0.43
   6  -2  -4    0.38    0.28
   6  -2  -4    1.23    0.46
  -6   2   4    0.95    0.50
   6   2  -4    1.41    0.39
  -6   2   4    1.04    0.42
   6   2  -4    0.43    0.34
  -4  -2   4   -0.08    0.35
   4  -2  -4    0.77    0.37
  -4  -2   4    0.29    0.34
   4  -2  -4    1.03    0.36
   4   2  -4    0.58    0.33
  -4   2   4    1.09    0.41
  -4   2   4    0.87    0.49
   4   2  -4    1.24    0.43
   4   2  -4    0.73    0.37
  -2  -2   4   37.59    1.39
  -2  -2   4   35.30    1.56
   2  -2  -4   35.51    1.43
   2  -2  -4   34.80    1.56
   2  -2  -4   34.72    1.49
  -2   2   4   34.48    1.59
  -2   2   4   37.40    1.46
   2   2  -4   36.65    1.57
   2   2  -4   36.33    1.34
   0  -2  -4   10.47    0.87
   0  -2  -4   11.16    0.85
   0  -2  -4   11.56    0.75
   0  -2   4   12.74    0.91
   0   2  -4   11.31    0.70
   0   2  -4   11.62    0.68
   0   2   4   12.43    0.99
   0   2   4   12.28    0.78
   0   2  -4   11.07    0.93
   2  -2   4   15.38    1.01
  -2  -2  -4   15.51    0.99
  -2  -2  -4   13.68    0.80
   2  -2   4   13.78    0.76
  -2   2  -4   11.58    0.99
  -2   2  -4   15.39    0.76
   2   2   4   14.79    0.84
   2   2   4   14.19    1.07
   2   2   4   15.75    0.96
  -4  -2  -4  342.05    9.01
  -4  -2  -4  328.63    8.79
   4  -2   4  335.79    8.75
   4  -2   4  336.90    9.09
  -4   2  -4  345.67    8.76
  -4   2  -4  335.41    9.19
   4   2   4  350.12    8.89
   4   2   4  346.45    9.30
   6  -2   4    0.40    0.38
   6  -2   4   -0.39    0.34
  -6  -2  -4   -0.07    0.37
   6   2   4   -0.12    0.38
  -6   2  -4    0.98    0.48
  -6   2  -4    0.58    0.41
   6   2   4    0.85    0.39
   8  -2   4    3.71    0.88
  -8  -2  -4    4.94    0.80
   8   2   4    2.70    0.71
   8   2   4    3.45    0.68
  -8   2  -4    3.51    0.68
  -8   2  -4    4.51    0.83
  10  -2   4   17.70    1.41
 -10  -2  -4   19.74    1.49
  10   2   4   18.98    1.36
 -10   2  -4   19.63    1.62
  10   2   4   18.69    1.38
 -10   2  -4   21.04    2.21
 -12  -2  -4    0.72    0.62
  12  -2   4    0.57    0.68
 -12  -2  -4    0.89    0.72
 -12   2  -4    0.22    0.67
  12   2   4    1.19    0.65
 -12   2  -4    1.14    0.63
 -14  -2  -4    0.56    0.71
 -14  -2  -4    0.10    0.57
 -14   2  -4    1.25    0.61
  14   2   4   -0.27    0.54
 -14   2  -4    1.28    0.79
  15  -3  -4    6.12    1.19
 -15  -3   4    4.12    1.04
 -15   3   4    3.13    0.97
  15   3  -4    2.75    0.95
 -13  -3   4    0.36    0.65
  13  -3  -4   -0.62    0.52
  13   3  -4   -0.27    0.57
 -13   3   4    1.05    0.70
 -11  -3   4    7.31    1.07
  11  -3  -4    9.98    1.24
  11   3  -4    8.93    1.24
 -11   3   4    8.46    1.16
  11   3  -4    8.45    0.64
   9  -3  -4   42.60    1.99
   9  -3  -4   37.14    1.40
   9  -3  -4   40.69    1.48
  -9  -3   4   40.44    2.00
   9   3  -4   41.43    1.48
   9   3  -4   39.60    1.57
   9   3  -4   37.80    2.00
  -9   3   4   40.10    2.08
   7  -3  -4    0.63    0.42
   7  -3  -4    0.38    0.31
  -7  -3   4    0.99    0.49
  -7   3   4    1.61    0.47
   7   3  -4    0.86    0.51
  -7   3   4    1.47    0.60
   7   3  -4    0.75    0.36
   7   3  -4    0.94    0.38
  -5  -3   4   11.88    0.96
  -5  -3   4   13.27    0.91
   5  -3  -4   12.59    0.83
   5  -3  -4   12.94    0.90
  -5   3   4   11.83    0.87
  -5   3   4   11.85    1.00
   5   3  -4   11.58    0.83
   5   3  -4   11.97    0.81
   5   3  -4   11.94    0.86
   3  -3  -4   12.97    0.82
  -3  -3   4   14.77    0.84
   3  -3  -4   14.71    0.86
  -3  -3   4   13.62    0.98
   3   3  -4   13.31    0.94
  -3   3   4   13.57    0.98
   3   3  -4   13.50    0.76
   1  -3  -4    8.23    0.65
   1  -3  -4    9.91    0.92
   1  -3  -4    9.51    0.84
  -1  -3   4    9.62    0.82
   1   3  -4   10.60    0.98
   1   3  -4    7.63    0.54
   1   3  -4    8.14    0.61
  -1   3   4    9.73    0.67
  -1   3   4    9.45    0.94
   1  -3   4   23.38    1.25
  -1  -3  -4   23.29    1.00
  -1  -3  -4   23.01    1.27
  -1   3  -4   23.86    0.89
   1   3   4   22.51    1.20
  -1   3  -4   24.02    1.30
   1   3   4   24.80    1.05
  -1   3  -4   24.11    0.92
   1   3   4   23.34    1.35
  -3  -3  -4  216.35    5.98
   3  -3   4  215.74    6.04
   3  -3   4  208.48    5.54
  -3  -3  -4  205.85    5.62
  -3   3  -4  213.59    5.54
   3   3   4  218.01    5.71
   3   3   4  220.31    6.23
  -3   3  -4  207.79    6.06
   5  -3   4    3.60    0.66
  -5  -3  -4    4.30    0.53
   5  -3   4    4.31    0.54
  -5  -3  -4    4.16    0.68
   5   3   4    4.59    0.77
  -5   3  -4    3.95    0.68
   5   3   4    5.20    0.63
  -5   3  -4    4.69    0.54
  -7  -3  -4    0.61    0.52
   7  -3   4    0.52    0.43
   7  -3   4    0.51    0.49
  -7   3  -4   -0.04    0.43
  -7   3  -4    0.98    0.44
   7   3   4    0.33    0.39
   7   3   4    0.68    0.50
  -9  -3  -4    0.56    0.60
   9  -3   4   -0.04    0.51
   9   3   4   -0.43    0.45
  -9   3  -4   -1.10    0.41
   9   3   4   -0.14    0.40
  11  -3   4   -0.37    0.50
 -11  -3  -4    0.04    0.63
  11   3   4    0.12    0.55
 -11   3  -4   -0.27    0.54
 -11   3  -4    0.60    0.60
  11   3   4   -0.46    0.49
 -13  -3  -4    0.82    0.62
 -13  -3  -4    1.24    0.76
  13  -3   4   -0.08    0.60
 -13   3  -4    1.74    0.66
 -13   3  -4   -0.48    0.64
  13   3   4    0.60    0.56
 -15  -3  -4    2.66    0.72
 -15  -3  -4    1.66    0.90
  15  -3   4    2.09    0.89
  15   3   4    2.67    0.88
 -15   3  -4    2.58    0.68
 -15   3  -4    0.72    0.77
 -16  -4   4    2.34    0.88
  16  -4  -4    0.80    0.76
  16   4  -4    2.99    1.02
 -16   4   4    1.85    0.96
  14  -4  -4    3.52    0.96
 -14  -4   4    1.38    0.89
 -14   4   4    3.39    0.99
  14   4  -4    4.13    1.01
 -12  -4   4   13.54    1.51
  12  -4  -4   14.49    1.49
 -12   4   4   13.19    1.51
  12   4  -4   13.84    1.52
  10  -4  -4   43.82    1.54
  10  -4  -4   48.70    1.65
 -10  -4   4   50.19    2.31
  10  -4  -4   51.59    2.27
 -10   4   4   50.83    2.46
  10   4  -4   46.99    1.77
  10   4  -4   47.23    1.67
  10   4  -4   48.68    2.35
  -8  -4   4    7.45    0.95
   8  -4  -4    7.06    0.65
   8  -4  -4    5.46    0.84
   8   4  -4    7.12    0.75
  -8   4   4    5.51    0.66
   8   4  -4    7.62    1.03
  -8   4   4    7.92    1.08
   8   4  -4    5.81    0.65
   6  -4  -4   51.19    2.02
  -6  -4   4   53.46    2.23
  -6  -4   4   51.49    2.00
   6  -4  -4   52.58    1.87
  -6   4   4   54.32    2.22
  -6   4   4   51.74    1.97
   6   4  -4   51.55    1.89
  -4  -4   4    2.28    0.53
   4  -4  -4    3.64    0.55
   4  -4  -4    3.27    0.51
  -4  -4   4    2.92    0.49
  -4   4   4    1.99    0.57
  -4   4   4    2.35    0.55
   4   4  -4    3.10    0.56
   4   4  -4    2.76    0.52
   2  -4  -4   49.08    1.97
  -2  -4   4   47.65    1.95
   2  -4  -4   46.76    1.66
  -2  -4   4   47.94    1.54
   2   4  -4   45.73    1.52
   2   4  -4   47.08    1.88
  -2   4   4   47.98    1.97
   0  -4  -4   24.43    1.01
   0  -4   4   25.90    1.34
   0  -4  -4   24.47    1.31
   0   4   4   24.21    1.00
   0   4   4   25.86    1.41
   0   4  -4   24.42    1.31
  -2  -4  -4   59.70    2.27
  -2  -4  -4   61.23    1.90
   2  -4   4   61.40    2.33
   2   4   4   63.09    2.45
   2   4   4   62.67    1.93
  -2   4  -4   62.04    2.33
   4  -4   4   31.27    1.59
  -4  -4  -4   34.65    1.60
  -4  -4  -4   32.30    1.21
   4  -4   4   33.02    1.20
  -4   4  -4   34.66    1.64
  -4   4  -4   33.72    1.20
   4   4   4   34.25    1.72
   4   4   4   34.45    1.31
  -6  -4  -4    0.60    0.27
  -6  -4  -4    0.20    0.46
   6  -4   4    0.17    0.43
   6   4   4    0.67    0.38
  -6   4  -4    0.33    0.34
  -6   4  -4    0.85    0.51
   6   4   4    1.05    0.50
   8  -4   4   16.28    1.31
  -8  -4  -4   16.05    1.33
   8   4   4   14.83    1.60
  -8   4  -4   15.58    1.10
  -8   4  -4   16.69    1.30
   8   4   4   15.95    1.06
  10  -4   4    8.19    1.20
 -10  -4  -4    6.92    1.11
  10   4   4    7.14    0.95
 -10   4  -4    7.23    0.97
 -10   4  -4   10.47    1.11
  10   4   4    7.84    1.06
 -12  -4  -4    1.03    0.76
  12  -4   4    0.83    0.65
  12   4   4    1.25    0.61
 -12   4  -4    0.57    0.64
  12   4   4    0.84    0.56
 -12   4  -4    1.46    0.66
  14  -4   4    0.64    0.67
 -14  -4  -4    0.12    0.64
 -14  -4  -4    2.11    0.89
 -14   4  -4    2.06    0.64
 -14   4  -4    1.06    0.76
  14   4   4    0.47    0.59
  15  -5  -4    0.95    0.76
 -15  -5   4    1.69    0.80
  15   5  -4    0.77    0.71
 -15   5   4    0.30    0.73
  13  -5  -4    0.87    0.69
 -13  -5   4    0.84    0.65
 -13   5   4    0.21    0.98
  11  -5  -4   -0.39    0.46
 -11  -5   4    1.06    0.66
 -11   5   4    0.50    0.71
  11   5  -4    0.11    0.35
  11   5  -4    0.24    0.34
  11   5  -4   -0.31    0.55
  -9  -5   4    4.49    1.25
   9  -5  -4    1.79    0.40
   9  -5  -4    2.98    0.68
  -9   5   4    2.31    0.51
  -9   5   4    2.08    0.76
   9   5  -4    1.98    0.49
   9   5  -4    3.52    0.81
   9   5  -4    3.10    0.53
  -7  -5   4   11.78    1.01
   7  -5  -4   12.69    0.81
   7  -5  -4   15.16    1.06
   7   5  -4   13.71    0.91
  -7   5   4   14.61    1.00
  -7   5   4   14.89    1.30
   5  -5  -4    0.86    0.36
  -5  -5   4    1.28    0.50
  -5  -5   4    0.26    0.36
   5   5  -4    0.30    0.39
  -5   5   4    0.66    0.41
  -5   5   4    0.36    0.48
   5   5  -4    0.47    0.30
  -3  -5   4    0.11    0.35
   3  -5  -4    0.55    0.27
   3  -5  -4    1.28    0.52
  -3  -5   4    0.09    0.29
   3  -5  -4    0.55    0.32
   3   5  -4    0.78    0.42
   3   5  -4    0.16    0.24
  -3   5   4    0.77    0.45
   1  -5  -4    2.81    0.41
  -1  -5   4    2.50    0.59
   1  -5  -4    2.76    0.61
   1   5  -4    1.69    0.49
  -1   5   4    3.75    0.67
  -1  -5  -4    0.21    0.43
   1  -5   4    0.37    0.40
  -1  -5  -4    0.36    0.23
   1   5   4    0.46    0.24
   1   5   4    0.63    0.42
  -1   5  -4    0.67    0.42
  -3  -5  -4    9.76    0.98
   3  -5   4    7.02    0.87
  -3  -5  -4    6.79    0.47
  -3   5  -4    7.43    0.91
   3   5   4    6.73    0.52
   3   5   4    7.65    0.96
  -5  -5  -4    6.44    0.52
   5  -5   4    7.61    0.59
   5  -5   4    8.18    0.99
  -5  -5  -4    7.76    0.94
   5   5   4    7.54    0.60
   5   5   4    6.73    0.95
  -5   5  -4    8.11    0.91
  -5   5  -4    7.56    0.59
   7  -5   4    5.13    0.90
  -7  -5  -4    5.93    0.62
  -7  -5  -4    4.80    0.85
   7  -5   4    5.77    0.67
   7   5   4    3.71    0.94
   7   5   4    7.19    0.76
  -7   5  -4    6.33    0.94
  -7   5  -4    5.48    0.66
   9  -5   4    3.36    0.84
  -9  -5  -4    3.61    0.85
   9   5   4    2.78    0.64
   9   5   4    3.53    0.83
  -9   5  -4    3.96    0.81
  -9   5  -4    3.71    0.69
 -11  -5  -4   -0.02    0.70
  11  -5   4    0.20    0.61
 -11   5  -4    1.64    0.69
 -11   5  -4    0.83    0.59
  11   5   4    0.81    0.52
  11   5   4    0.40    0.55
 -13  -5  -4   -0.33    0.69
 -13   5  -4    0.24    0.70
  13   5   4   -0.27    0.51
 -13   5  -4    1.81    0.66
  13   5   4    0.78    0.63
 -15  -5  -4    0.80    0.65
  15  -5   4    1.19    0.81
 -15  -5  -4    1.44    0.92
 -15   5  -4    1.50    0.62
 -15   5  -4    1.40    0.81
  15   5   4    0.44    0.62
  14  -6  -4    0.72    0.65
 -14   6   4    0.34    0.80
  14   6  -4    1.75    0.79
 -12  -6   4    2.79    0.78
  12  -6  -4    3.38    0.83
  12   6  -4    2.17    0.44
 -12   6   4    3.73    0.97
  12   6  -4    2.64    0.83
  12   6  -4    3.01    0.53
  10  -6  -4   17.56    1.33
  10  -6  -4   14.70    0.82
 -10  -6   4   18.24    1.38
 -10   6   4   17.22    1.00
  10   6  -4   21.50    1.56
  10   6  -4   16.98    1.00
 -10   6   4   16.93    1.66
   8  -6  -4    3.30    0.69
  -8  -6   4    3.63    0.70
   8  -6  -4    2.82    0.46
   8   6  -4    2.44    0.70
   8   6  -4    4.44    0.64
  -8   6   4    4.67    0.90
  -8   6   4    3.33    0.63
  -6  -6   4   23.15    1.43
  -6  -6   4   24.51    1.27
   6  -6  -4   23.88    1.26
  -6   6   4   26.25    1.36
  -6   6   4   24.37    1.55
   6   6  -4   24.03    1.24
  -4  -6   4    5.28    0.60
   4  -6  -4    6.94    0.92
   4  -6  -4    5.03    0.61
   4  -6  -4    4.92    0.58
  -4  -6   4    5.51    0.80
  -4   6   4    4.65    0.70
   4   6  -4    5.25    0.70
   4   6  -4    4.63    0.53
   2  -6  -4  110.60    3.73
   2  -6  -4  120.22    3.30
   2  -6  -4  111.20    3.41
  -2  -6   4  114.13    3.76
  -2  -6   4  115.05    3.13
   2   6  -4  122.73    3.67
  -2   6   4  120.87    3.77
   0  -6  -4   14.51    0.66
   0  -6  -4   15.69    1.12
   0  -6   4   15.08    1.07
   0   6   4   12.85    1.05
   0   6  -4   14.58    1.05
  -2  -6  -4   62.32    1.78
   2  -6   4   60.69    2.44
  -2  -6  -4   62.60    2.43
  -2   6  -4   67.26    2.44
   2   6   4   62.04    1.82
   2   6   4   65.19    2.51
  -4  -6  -4    3.58    0.72
  -4  -6  -4    3.79    0.39
   4  -6   4    3.73    0.72
   4   6   4    3.29    0.40
  -4   6  -4    3.31    0.66
   4   6   4    2.89    0.67
   6  -6   4   12.89    1.29
  -6  -6  -4   13.09    1.43
   6  -6   4   11.54    0.76
  -6  -6  -4   10.14    0.71
  -6   6  -4   12.17    1.28
  -6   6  -4   12.10    0.76
   6   6   4   11.72    1.45
   6   6   4   12.06    0.76
   8  -6   4    1.35    0.63
  -8  -6  -4    0.10    0.57
   8  -6   4   -0.10    0.37
  -8   6  -4    0.21    0.53
   8   6   4   -0.16    0.38
  -8   6  -4    0.24    0.45
   8   6   4    0.02    0.49
  10  -6   4   10.04    1.30
 -10  -6  -4   12.97    1.44
 -10   6  -4   11.42    1.18
  10   6   4   10.77    1.06
 -10   6  -4    9.89    1.04
  10   6   4    9.77    1.19
  12  -6   4    1.73    0.85
 -12  -6  -4    2.17    0.88
  12   6   4    1.81    0.68
 -12   6  -4    2.34    0.71
  12   6   4    2.04    0.67
 -12   6  -4    3.04    0.80
  14  -6   4    0.03    0.66
 -14  -6  -4   -0.42    0.69
 -14   6  -4    0.79    0.71
  14   6   4   -0.20    0.59
  14   6   4    1.34    0.65
 -14   6  -4    1.04    0.60
  15  -7  -4    4.34    1.03
 -15  -7   4    3.17    0.92
  15   7  -4    3.39    1.04
 -15   7   4    4.35    1.11
  13  -7  -4    1.18    0.74
 -13  -7   4    0.70    0.64
 -13   7   4   -0.04    0.65
  13   7  -4    0.22    0.64
 -11  -7   4    0.66    0.63
  11  -7  -4   -0.08    0.53
  11  -7  -4   -0.26    0.30
 -11   7   4    0.20    0.69
  11   7  -4    0.01    0.53
 -11   7   4    0.00    0.34
  11   7  -4    0.13    0.40
  -9  -7   4    6.90    1.13
   9  -7  -4    5.49    0.66
   9  -7  -4    8.39    1.04
  -9   7   4    8.36    0.90
  -9   7   4    8.60    1.27
   9   7  -4    7.16    1.04
   9   7  -4    8.78    0.85
  -7  -7   4    2.49    0.69
  -7  -7   4    2.31    0.57
   7  -7  -4    3.09    0.63
  -7   7   4    2.39    0.59
  -7   7   4    3.51    0.81
   7   7  -4    3.46    0.63
   5  -7  -4    0.63    0.37
   5  -7  -4   -0.12    0.31
  -5  -7   4   -0.45    0.35
  -5  -7   4   -0.59    0.30
   5   7  -4   -0.24    0.27
  -5   7   4   -0.03    0.38
   5   7  -4    0.30    0.40
  -3  -7   4   55.11    2.24
  -3  -7   4   53.29    1.69
   3  -7  -4   53.40    1.80
   3  -7  -4   53.98    1.77
   3  -7  -4   52.88    2.26
  -3   7   4   52.43    2.16
   3   7  -4   53.17    1.70
   3   7  -4   52.05    2.08
   1  -7  -4    4.82    0.45
   1  -7  -4    4.91    0.43
   1  -7  -4    5.21    0.80
  -1  -7   4    4.56    0.75
  -1   7   4    4.24    0.74
   1   7  -4    4.27    0.66
  -1  -7  -4   -0.21    0.44
   1  -7   4    0.94    0.45
   1   7   4    0.47    0.42
  -1   7  -4    0.12    0.36
  -3  -7  -4   11.79    1.15
   3  -7   4   12.71    1.08
  -3   7  -4   12.10    1.04
   3   7   4   11.31    1.17
  -5  -7  -4    2.78    0.35
   5  -7   4    2.59    0.68
  -5  -7  -4    2.79    0.80
   5   7   4    2.92    0.39
   5   7   4    1.84    0.63
   7  -7   4   -0.47    0.48
  -7  -7  -4    0.22    0.26
  -7  -7  -4    0.77    0.61
  -7   7  -4    0.46    0.39
   7   7   4   -0.49    0.30
   7   7   4   -0.44    0.44
  -7   7  -4    0.63    0.54
   9  -7   4   -0.56    0.53
  -9  -7  -4   -0.35    0.65
   9   7   4   -0.54    0.45
   9   7   4    0.13    0.39
  -9   7  -4    0.47    0.53
  -9   7  -4    0.59    0.50
 -11  -7  -4   14.29    1.55
  11  -7   4    9.81    1.40
 -11   7  -4   13.24    1.29
 -11   7  -4   13.12    1.28
  11   7   4   12.40    1.09
  11   7   4   14.69    1.51
  13  -7   4    0.84    0.81
 -13  -7  -4    0.56    0.82
 -13   7  -4    1.43    0.70
  13   7   4    0.53    0.57
 -13   7  -4    1.50    0.65
  13   7   4   -0.02    0.49
  14  -8  -4    0.65    0.68
 -14  -8   4    0.90    0.69
 -14   8   4    0.62    0.82
  14   8  -4    1.84    0.86
  12  -8  -4    0.49    0.61
 -12  -8   4    0.43    0.64
 -12   8   4    0.28    0.37
  12   8  -4   -0.04    0.43
  12   8  -4   -0.09    0.61
  10  -8  -4    7.51    1.03
 -10  -8   4    8.08    1.09
 -10   8   4    8.44    0.89
 -10   8   4    8.41    1.27
  10   8  -4    6.26    1.05
  10   8  -4    8.82    0.87
   8  -8  -4    1.08    0.54
  -8  -8   4    1.53    0.56
  -8   8   4    0.71    0.48
   8   8  -4    0.69    0.49
  -8   8   4   -0.48    0.57
  -6  -8   4   15.26    1.26
   6  -8  -4   17.08    1.05
  -6  -8   4   15.72    1.02
  -6   8   4   13.49    1.12
  -6   8   4   14.92    1.41
   6   8  -4   14.93    1.08
  -4  -8   4   17.49    1.37
   4  -8  -4   19.12    1.40
   4  -8  -4   16.20    0.88
   4  -8  -4   17.42    0.94
  -4  -8   4   16.38    0.89
  -4   8   4   19.03    1.26
   4   8  -4   17.40    0.89
   4   8  -4   17.61    1.15
   2  -8  -4    3.58    0.76
   2  -8  -4    3.51    0.39
   2  -8  -4    2.87    0.38
  -2  -8   4    3.90    0.74
  -2   8   4    2.05    0.60
   2   8  -4    2.67    0.60
   0  -8   4    2.00    0.58
   0  -8  -4    3.00    0.72
   0   8   4    2.72    0.64
   0   8  -4    3.51    0.68
   2  -8   4   22.69    1.55
  -2  -8  -4   22.34    1.46
   2   8   4   22.43    1.50
  -2   8  -4   22.24    1.37
  -4  -8  -4   15.92    1.29
   4  -8   4   12.60    1.29
   4   8   4   14.94    1.24
  -4   8  -4   13.08    1.11
   6  -8   4    0.79    0.60
  -6  -8  -4    0.79    0.61
  -6  -8  -4    0.64    0.26
   6   8   4    0.13    0.27
  -6   8  -4    0.72    0.32
   6   8   4    1.91    0.64
  -6   8  -4   -0.02    0.52
   8  -8   4    0.48    0.42
  -8  -8  -4    0.09    0.29
   8  -8   4    0.63    0.63
  -8  -8  -4    1.06    0.65
  -8   8  -4    0.86    0.45
   8   8   4    0.26    0.38
  -8   8  -4    0.82    0.61
   8   8   4    0.21    0.58
 -10  -8  -4   -1.02    0.51
  10  -8   4   -0.01    0.62
  10   8   4    0.34    0.58
 -10   8  -4    0.18    0.54
 -10   8  -4   -0.01    0.48
  10   8   4   -0.01    0.43
 -12  -8  -4    1.16    0.97
  12  -8   4   -0.66    0.63
 -12   8  -4    0.61    0.60
  12   8   4    0.19    0.60
 -12   8  -4    0.12    0.62
  12   8   4    0.42    0.49
 -14  -8  -4   -0.14    0.81
  14  -8   4    0.37    0.79
 -14   8  -4   -0.56    0.61
 -14   8  -4   -0.30    0.59
  14   8   4    0.54    0.57
  14   8   4    0.57    0.67
 -13  -9   4   -0.40    0.52
  13  -9  -4    0.16    0.64
 -13   9   4   -0.28    0.68
  13   9  -4    0.36    0.66
  13   9  -4    0.09    0.43
 -11  -9   4    6.35    0.99
  11  -9  -4    8.70    1.14
  11   9  -4    8.27    1.21
 -11   9   4    6.47    1.19
 -11   9   4    7.00    0.83
  11   9  -4    8.40    0.88
   9  -9  -4    3.49    0.74
  -9  -9   4    2.28    0.66
   9   9  -4    3.08    0.64
  -9   9   4    3.56    0.68
  -9   9   4    5.30    1.03
   9   9  -4    5.14    1.01
   7  -9  -4    0.21    0.43
  -7  -9   4   -0.10    0.51
  -7  -9   4    0.51    0.45
  -7   9   4    0.47    0.65
  -7   9   4   -0.36    0.42
   7   9  -4    0.55    0.50
   5  -9  -4   13.91    0.88
   5  -9  -4   15.39    1.50
   5  -9  -4   14.12    0.90
  -5  -9   4   14.69    0.92
  -5  -9   4   13.73    1.21
   5   9  -4   13.90    1.09
   5   9  -4   13.82    0.90
  -5   9   4   14.66    1.17
   3  -9  -4    2.37    0.38
  -3  -9   4    2.31    0.37
   3  -9  -4    1.66    0.37
   3  -9  -4    0.62    0.55
  -3  -9   4    1.62    0.56
   3   9  -4    3.09    0.66
   3   9  -4    1.75    0.35
  -3   9   4    1.90    0.58
  -1  -9   4   10.00    1.19
  -1   9   4    9.13    1.02
   1   9  -4    9.94    1.32
   1  -9   4   19.22    1.33
  -1  -9  -4   20.12    1.63
  -1   9  -4   18.56    1.29
   1   9   4   18.51    1.39
  -3  -9  -4    8.91    1.15
   3  -9   4   10.01    1.15
  -3   9  -4    7.89    0.99
   3   9   4    7.44    1.03
   5  -9   4    8.72    1.16
  -5  -9  -4    9.19    1.12
   5   9   4    7.68    1.06
  -5   9  -4    5.51    0.86
   7  -9   4    0.68    0.64
  -7  -9  -4    2.22    0.37
  -7  -9  -4    1.30    0.75
   7  -9   4    2.17    0.45
   7   9   4    0.39    0.59
  -7   9  -4    1.94    0.46
  -7   9  -4    1.45    0.68
  -9  -9  -4    1.97    0.47
  -9  -9  -4    3.85    0.95
   9  -9   4    2.22    0.79
   9   9   4    2.44    0.51
  -9   9  -4    2.78    0.60
   9   9   4    2.31    0.75
  -9   9  -4    2.30    0.72
  11  -9   4    2.02    1.44
 -11  -9  -4    2.08    0.88
 -11   9  -4    1.82    0.64
  11   9   4    1.76    0.79
 -11   9  -4    2.46    0.80
  11   9   4    2.63    0.59
 -13  -9  -4    0.56    0.84
  13  -9   4   -0.28    0.74
  13   9   4   -0.30    0.48
 -13   9  -4    0.87    0.68
  13   9   4    1.30    0.72
 -13   9  -4    0.74    0.64
  14 -10  -4    1.78    0.80
 -14 -10   4    0.62    0.70
  14  10  -4    0.29    0.45
  14  10  -4    2.32    0.89
 -14  10   4    0.50    0.85
  12 -10  -4    3.70    0.86
 -12 -10   4    4.48    0.96
 -12  10   4    4.83    0.71
  12  10  -4    6.83    1.21
  12  10  -4    4.34    0.73
 -12  10   4    6.54    1.21
  10 -10  -4    0.53    0.56
 -10 -10   4   -0.03    0.48
  10  10  -4    0.72    0.54
 -10  10   4    0.70    0.76
  10  10  -4    1.07    0.72
 -10  10   4    0.63    0.50
  -8 -10   4    3.72    0.73
   8 -10  -4    4.76    0.90
  -8 -10   4    3.93    0.89
  -8  10   4    5.36    1.05
  -8  10   4    6.54    0.88
  -6 -10   4    0.72    0.55
   6 -10  -4    0.46    0.40
  -6 -10   4    0.23    0.41
   6 -10  -4    0.47    0.66
   6  10  -4    0.61    0.54
  -6  10   4    0.63    0.53
  -4 -10   4   47.07    2.23
   4 -10  -4   47.08    1.66
   4 -10  -4   46.66    2.32
  -4 -10   4   49.90    1.68
   4 -10  -4   45.71    1.72
   4  10  -4   47.77    1.68
   4  10  -4   46.47    2.02
  -4  10   4   49.10    2.20
   2 -10  -4    2.50    0.31
  -2 -10   4    2.19    0.67
   2 -10  -4    1.85    0.68
   2  10  -4    1.90    0.62
  -2  10   4    2.04    0.73
   0 -10   4    3.26    0.73
   0 -10  -4    2.33    0.71
   0  10   4    1.96    0.63
   0  10  -4    3.20    0.68
  -2 -10  -4    5.11    0.92
   2 -10   4    3.72    0.80
  -2  10  -4    2.51    0.66
   2  10   4    3.82    0.73
   4 -10   4    6.61    1.04
  -4 -10  -4    9.68    1.20
  -4  10  -4    7.12    1.01
   4  10   4    8.59    1.14
   6 -10   4    0.84    0.64
  -6 -10  -4   -0.13    0.56
   6  10   4    0.22    0.51
  -6  10  -4   -0.50    0.53
   8 -10   4    8.89    0.79
   8 -10   4   10.48    1.36
  -8 -10  -4   13.33    1.47
   8  10   4    8.97    1.22
  -8  10  -4   10.28    0.87
  -8  10  -4   10.73    1.18
   8  10   4   10.27    0.71
 -10 -10  -4   -0.08    0.69
  10 -10   4    1.59    0.81
 -10  10  -4    1.96    0.71
  10  10   4    1.42    0.47
  10  10   4    1.11    0.71
 -10  10  -4    2.51    0.65
 -12 -10  -4    3.56    1.02
  12 -10   4    1.23    0.84
  12  10   4    3.51    0.71
 -12  10  -4    3.46    0.73
  12  10   4    3.30    0.89
 -12  10  -4    3.01    0.79
 -13 -11   4    2.00    0.77
 -13  11   4    3.99    0.67
 -13  11   4    3.33    1.06
  13  11  -4    5.62    1.17
 -11 -11   4    0.63    0.58
  11 -11  -4    0.16    0.60
  11  11  -4    1.14    1.15
 -11  11   4    2.17    0.87
 -11  11   4    0.99    0.52
  11  11  -4    1.71    0.60
  -9 -11   4    7.53    0.97
   9 -11  -4    8.38    1.05
  -9  11   4    7.32    1.26
   9  11  -4    9.28    1.32
  -9  11   4    7.59    1.00
   9  11  -4    8.98    1.02
  -7 -11   4    2.60    0.80
   7 -11  -4    3.47    0.65
  -7 -11   4    3.04    0.66
   7 -11  -4    2.16    1.02
   7  11  -4    2.50    0.70
  -7  11   4    2.52    0.71
   5 -11  -4    1.03    0.75
   5 -11  -4    1.15    0.38
  -5 -11   4    1.46    0.65
  -5 -11   4    1.01    0.42
   5 -11  -4    1.25    0.42
   5  11  -4    1.26    0.61
  -5  11   4    0.61    0.54
   5  11  -4    1.29    0.45
   3 -11  -4   21.04    0.93
  -3 -11   4   22.51    1.53
  -3 -11   4   21.12    0.90
   3 -11  -4   18.78    1.06
   3 -11  -4   22.95    1.64
  -3  11   4   23.95    1.53
   3  11  -4   22.28    1.41
   1 -11  -4    0.30    0.62
  -1 -11   4    1.01    0.60
  -1  11   4    0.73    0.55
   1  11  -4   -0.11    0.50
   1 -11   4   14.55    1.41
  -1 -11  -4   13.57    1.36
   1  11   4   11.06    1.25
  -1  11  -4   12.35    1.18
   3 -11   4   -0.12    0.56
  -3 -11  -4    0.87    0.68
  -3  11  -4   -0.40    0.48
   3  11   4    0.02    0.49
   5 -11   4   14.18    1.52
  -5 -11  -4   17.66    1.51
   5  11   4   17.19    1.47
  -5  11  -4   14.01    1.36
   7 -11   4   -0.32    0.53
  -7 -11  -4   -0.21    0.56
  -7  11  -4   -0.71    0.51
   7  11   4    0.49    0.64
   9 -11   4   11.13    1.08
  -9 -11  -4   14.62    1.59
   9 -11   4   10.67    1.45
   9  11   4   12.63    0.84
  -9  11  -4   18.19    1.10
   9  11   4   17.00    1.67
  -9  11  -4   15.72    1.34
   9  11   4   13.02    0.82
 -11 -11  -4   -0.15    0.72
  11 -11   4   -0.16    0.63
  11  11   4    0.29    0.59
  11  11   4   -0.10    0.41
 -11  11  -4   -0.15    0.60
 -11  11  -4    0.35    0.56
 -13 -11  -4    0.61    0.84
  13 -11   4    0.83    0.87
 -13  11  -4    2.44    0.79
 -13  11  -4    1.37    0.73
  13  11   4    0.59    0.73
  13  11   4    0.59    0.54
 -12 -12   4    1.96    0.72
  12 -12  -4    3.02    0.82
 -12  12   4    2.22    0.64
 -12  12   4    2.84    1.05
  12  12  -4    2.00    0.62
  12  12  -4    2.36    0.92
 -10 -12   4   -0.13    0.46
  10 -12  -4    0.64    0.56
 -10  12   4   -0.02    0.53
  10  12  -4    0.29    0.64
  10  12  -4    0.71    0.59
  -8 -12   4    1.39    0.56
  -8 -12   4    2.53    0.80
   8 -12  -4    1.20    0.84
   8 -12  -4    3.36    1.07
   8  12  -4    2.72    0.72
  -8  12   4    2.54    0.70
  -6 -12   4    7.98    0.84
   6 -12  -4    8.71    0.86
  -6 -12   4    9.47    1.22
   6 -12  -4    8.72    1.28
  -6  12   4    7.54    1.03
   6  12  -4    7.49    1.00
   4 -12  -4   16.41    0.87
  -4 -12   4   16.25    0.91
  -4 -12   4   16.06    1.38
   4 -12  -4   17.41    1.65
   4  12  -4   18.20    1.36
   4  12  -4   16.38    1.17
  -4  12   4   13.66    1.37
   2 -12  -4    6.25    1.07
  -2 -12   4    6.37    1.01
  -2  12   4    7.46    1.08
   2  12  -4    7.86    1.03
   0 -12  -4    0.06    0.65
   0 -12   4    0.02    0.53
   0  12  -4    0.45    0.58
   0  12   4   -0.06    0.50
  -2 -12  -4    2.18    0.77
   2 -12   4    2.03    0.76
   2  12   4    3.53    0.80
  -2  12  -4    1.37    0.64
  -4 -12  -4   37.92    2.15
   4 -12   4   34.75    2.01
  -4  12  -4   34.96    1.88
   4  12   4   29.06    1.91
  -6 -12  -4   12.32    1.46
   6 -12   4    9.62    1.29
  -6  12  -4   10.35    1.19
   6  12   4    8.27    1.23
   8 -12   4   -0.33    0.63
  -8 -12  -4    1.74    0.79
  -8  12  -4    0.86    0.45
  -8  12  -4    1.08    0.73
   8  12   4    0.33    0.60
  10 -12   4    1.48    0.88
 -10 -12  -4    2.88    0.94
 -10  12  -4    1.88    0.61
  10  12   4    1.32    0.78
  10  12   4    1.65    0.44
 -10  12  -4    3.56    0.86
 -12 -12  -4    3.45    1.13
  12 -12   4    0.95    0.82
  12  12   4    2.22    0.92
 -12  12  -4    4.04    0.82
  12  12   4    2.01    0.58
 -12  12  -4    3.98    0.89
 -13 -13   4    0.50    0.70
  13 -13  -4    0.93    0.75
  13  13  -4   -1.41    0.46
  13  13  -4    0.01    0.72
 -13  13   4   -0.28    0.76
 -13  13   4   -0.04    0.52
  11 -13  -4    1.69    0.69
 -11 -13   4    0.45    0.58
  11  13  -4    1.45    0.82
 -11  13   4    1.40    0.60
  11  13  -4   -0.19    0.55
 -11  13   4   -1.31    0.63
   9 -13  -4   -0.60    0.81
  -9 -13   4   -0.62    0.44
   9 -13  -4    1.42    0.56
  -9  13   4    0.91    0.64
   9  13  -4    0.57    0.58
   7 -13  -4    4.49    1.19
   7 -13  -4    4.52    0.72
  -7 -13   4    3.49    0.68
  -7 -13   4    4.77    0.98
  -7  13   4    3.53    0.79
   7  13  -4    3.19    0.75
  -5 -13   4   26.73    1.29
   5 -13  -4   24.59    1.22
  -5 -13   4   29.40    1.80
   5 -13  -4   30.74    1.28
   5 -13  -4   24.59    1.88
   5  13  -4   27.23    1.67
  -5  13   4   26.14    1.70
   5  13  -4   26.72    1.34
  -3 -13   4   16.84    1.57
   3 -13  -4   14.33    1.50
   3 -13  -4   13.31    0.70
  -3  13   4   10.41    1.22
   3  13  -4   15.84    1.31
   3  13  -4   12.33    0.78
  -1 -13   4    0.79    0.62
   1 -13  -4   -0.24    0.64
  -1  13   4    0.38    0.53
   1  13  -4   -0.70    0.46
   1 -13   4    1.92    0.77
  -1 -13  -4    4.07    0.99
   1  13   4    3.07    0.82
  -1  13  -4    4.39    0.84
  -3 -13  -4    0.46    0.66
   3 -13   4    0.97    0.70
   3  13   4    0.46    0.62
  -3  13  -4    0.89    0.64
   5 -13   4    1.06    0.78
  -5 -13  -4    1.16    0.72
  -5  13  -4    0.63    0.67
   5  13   4    1.19    0.69
  -7 -13  -4   17.28    1.72
   7 -13   4   15.72    1.71
   7  13   4   16.84    1.74
  -7  13  -4   19.91    1.54
   9 -13   4    1.44    0.83
   9 -13   4    0.28    0.73
  -9 -13  -4    3.04    0.94
  -9  13  -4    1.18    0.55
   9  13   4    3.58    0.97
  -9  13  -4    0.99    0.70
 -11 -13  -4    1.23    0.90
  11 -13   4   -0.10    0.71
 -11  13  -4   -0.02    0.66
 -11  13  -4    0.81    0.63
  11  13   4    0.59    0.39
  12 -14  -4   -0.28    0.58
 -12 -14   4    0.55    0.64
 -12  14   4    0.84    0.63
  12  14  -4    0.76    0.81
  12  14  -4    0.59    0.63
  10 -14  -4    1.25    0.65
  10 -14  -4    0.79    0.83
 -10 -14   4    1.27    0.63
  10  14  -4    0.09    0.66
  10  14  -4   -0.07    0.54
 -10  14   4    0.49    0.60
   8 -14  -4    0.18    0.80
  -8 -14   4   -0.35    0.54
   8 -14  -4    0.54    0.52
  -8 -14   4   -0.72    0.37
   8  14  -4   -1.09    0.47
  -8  14   4    0.17    0.58
  -6 -14   4   20.82    1.61
   6 -14  -4   17.75    1.81
  -6 -14   4   19.08    1.17
   6 -14  -4   18.56    1.11
  -6  14   4   20.13    1.54
   6  14  -4   18.25    1.43
   4 -14  -4    4.61    0.59
  -4 -14   4    4.52    0.57
   4 -14  -4    5.39    0.60
  -4 -14   4    5.36    1.02
   4 -14  -4    4.41    1.08
   4  14  -4    4.27    0.60
   4  14  -4    6.19    1.01
  -4  14   4    6.39    1.06
  -2 -14   4   15.26    1.53
   2 -14  -4   12.95    1.51
  -2  14   4   12.53    1.43
   2  14  -4   12.32    1.25
   0 -14   4    4.85    0.98
   0 -14  -4    5.35    1.04
   0  14  -4    4.61    0.91
   0  14   4    4.40    0.90
   2 -14   4    2.34    0.76
  -2 -14  -4    1.71    0.86
   2  14   4    2.45    0.78
  -2  14  -4    1.65    0.72
   4 -14   4    7.02    1.17
  -4 -14  -4    8.44    1.26
   4  14   4    8.54    1.23
  -4  14  -4    9.61    1.24
   6 -14   4    0.24    0.74
  -6 -14  -4    0.34    0.68
   6  14   4    0.32    0.63
  -6  14  -4    0.68    0.66
  -8 -14  -4    6.30    1.19
   8 -14   4    4.41    1.09
  -8  14  -4    6.82    1.09
   8  14   4    5.80    1.13
  10 -14   4    0.70    0.80
 -10 -14  -4    0.86    0.82
 -10  14  -4    1.57    0.80
  10  14   4    1.42    0.82
  11 -15  -4    2.32    1.05
  11 -15  -4    3.07    0.81
 -11 -15   4    1.70    0.73
  11  15  -4    2.24    0.97
 -11  15   4    0.67    0.66
  11  15  -4    0.59    0.66
   9 -15  -4   -0.30    0.49
   9 -15  -4   -0.29    0.73
  -9 -15   4   -0.16    0.47
  -9  15   4    0.76    0.66
   9  15  -4   -0.50    0.56
   7 -15  -4    0.35    0.47
  -7 -15   4    0.34    0.47
  -7 -15   4   -0.08    0.61
   7 -15  -4    0.40    0.98
  -7  15   4    0.43    0.60
   7  15  -4   -1.00    0.53
  -5 -15   4    8.97    1.25
   5 -15  -4    4.48    0.60
   5 -15  -4    7.68    1.28
  -5 -15   4    8.66    0.83
   5 -15  -4    8.43    0.79
  -5  15   4    7.73    1.19
   5  15  -4    7.19    1.07
  -3 -15   4    4.75    0.96
   3 -15  -4    3.76    0.98
   3  15  -4    3.24    0.86
  -3  15   4    3.08    0.89
   1 -15  -4   15.21    1.65
  -1 -15   4   17.70    1.71
   1  15  -4   17.31    1.46
  -1  15   4   14.01    1.54
  -1 -15  -4    1.87    0.86
   1 -15   4    4.08    0.95
   1  15   4    2.47    0.82
  -1  15  -4    2.24    0.79
  -3 -15  -4   -0.22    0.66
   3 -15   4   -0.52    0.62
   3  15   4    0.13    0.59
  -3  15  -4    0.40    0.65
  -5 -15  -4   -0.19    0.64
   5 -15   4    1.26    0.80
  -5  15  -4    0.18    0.64
   5  15   4    0.10    0.60
  -7 -15  -4    1.77    0.87
   7 -15   4    0.80    0.80
   7  15   4    0.01    0.64
  -7  15  -4    1.11    0.74
   9 -15   4   -0.12    0.67
  -9 -15  -4   -0.17    0.67
   9  15   4    0.93    0.78
  -9  15  -4    1.14    1.23
 -11 -15  -4    6.78    1.39
  11 -15   4    7.51    1.47
 -11  15  -4    4.40    1.01
  11  15   4    5.44    1.23
  10 -16  -4    1.30    0.95
 -10 -16   4   -0.37    0.51
  10 -16  -4    0.56    0.63
  10  16  -4    1.74    0.80
  10  16  -4    1.48    0.85
 -10  16   4   -0.30    0.59
  -8 -16   4    0.93    0.75
   8 -16  -4    0.96    0.56
   8 -16  -4    1.30    0.85
  -8 -16   4    0.29    0.54
  -8  16   4   -0.33    0.58
   8  16  -4    1.62    0.75
  -6 -16   4   10.05    1.34
  -6 -16   4   13.75    1.04
   6 -16  -4   12.24    0.96
   6  16  -4   12.73    1.36
  -6  16   4   11.60    1.40
  -4 -16   4    2.37    0.47
  -4 -16   4    3.18    0.86
   4 -16  -4    6.99    1.27
   4 -16  -4    4.26    0.52
   4 -16  -4    3.24    0.48
   4  16  -4    2.28    0.77
  -4  16   4    3.38    0.92
   4  16  -4    2.30    0.55
   2 -16  -4   44.36    2.52
  -2 -16   4   45.39    2.39
   2  16  -4   41.53    2.23
  -2  16   4   44.56    2.45
   0 -16   4    1.85    0.83
   0 -16  -4    1.97    0.86
   0  16  -4    2.66    0.85
   0  16   4    2.23    0.81
  -2 -16  -4   -0.51    0.57
   2 -16   4    0.22    0.67
  -2  16  -4    2.27    0.81
   2  16   4    0.50    0.66
   4 -16   4    0.85    0.78
  -4 -16  -4    0.00    0.69
  -4  16  -4   -0.19    0.61
   4  16   4    0.59    0.71
   6 -16   4   -0.10    0.67
  -6 -16  -4    0.13    0.73
   6  16   4   -0.40    0.59
  -6  16  -4   -0.19    0.72
   8 -16   4   -0.60    0.75
  -8 -16  -4    0.36    0.74
   8  16   4    0.37    0.72
  -8  16  -4   -0.85    0.59
  10 -16   4    6.10    1.34
 -10 -16  -4    6.56    1.33
 -10  16  -4    6.91    1.20
  10  16   4    4.82    1.23
   9 -17  -4    0.94    0.96
   9 -17  -4   -0.16    0.56
  -9 -17   4   -0.23    0.49
  -9  17   4   -0.70    0.59
   7 -17  -4    0.18    0.50
   7 -17  -4   -0.76    0.73
  -7 -17   4    0.71    0.68
  -7  17   4    0.55    0.71
   7  17  -4    0.44    0.76
  -5 -17   4    4.82    0.98
  -5 -17   4    4.31    0.66
   5 -17  -4    5.29    0.66
   5 -17  -4    4.34    1.13
  -5  17   4    6.21    1.11
   5  17  -4    3.73    0.89
  -3 -17   4    2.93    0.83
   3 -17  -4    4.36    1.19
  -3  17   4    3.18    0.91
   3  17  -4    2.99    0.85
  -1 -17   4    3.04    0.92
   1 -17  -4    1.54    0.86
  -1  17   4    1.47    0.78
   1  17  -4    2.46    0.81
   1 -17   4   14.18    1.58
  -1 -17  -4   15.81    1.73
  -1  17  -4   14.19    1.62
   1  17   4   12.92    1.59
   3 -17   4    0.05    0.68
   3  17   4    0.07    0.69
  -3  17  -4   -0.42    0.82
  -5 -17  -4   -0.25    0.65
   5 -17   4    0.19    0.74
   5  17   4   -0.43    0.53
  -5  17  -4    1.72    0.85
   7 -17   4   -0.14    0.73
  -7 -17  -4    0.32    0.79
  -7  17  -4   -0.67    0.65
   7  17   4    0.96    0.80
   9 -17   4    1.36    0.91
  -9 -17  -4    0.42    0.77
  -9  17  -4   -0.87    0.69
   9  17   4    0.10    0.73
  -8 -18   4    0.26    0.54
   8 -18  -4    2.14    1.06
   8 -18  -4    0.14    0.56
  -8 -18   4    0.10    0.62
   8  18  -4    0.76    0.74
  -8  18   4    0.21    0.71
  -6 -18   4    4.81    0.73
  -6 -18   4    3.41    0.98
   6 -18  -4    5.87    0.78
   6 -18  -4    4.87    1.22
   6  18  -4    6.19    1.10
  -6  18   4    5.10    1.12
   4 -18  -4    0.66    0.91
  -4 -18   4    1.38    0.95
  -4 -18   4   -0.21    0.34
   4  18  -4    0.10    0.63
  -4  18   4    0.42    1.10
   2 -18  -4    2.66    0.99
  -2 -18   4    3.05    0.94
   2  18  -4    1.68    0.80
  -2  18   4    2.02    1.11
   0 -18  -4    8.68    1.38
   0 -18   4    8.57    1.30
   0  18   4    6.80    1.26
   0  18  -4    6.78    1.13
  -2 -18  -4    0.45    0.79
  -2  18  -4    0.74    0.73
   2  18   4   -0.52    0.57
   4 -18   4    0.10    0.68
  -4 -18  -4    0.10    0.73
   4  18   4    0.19    0.61
  -4  18  -4    1.16    0.79
  -6 -18  -4   -0.49    0.68
   6 -18   4   -0.27    0.73
   6  18   4    0.10    0.64
  -6  18  -4    0.80    0.76
  -8 -18  -4   -0.30    0.80
   8 -18   4   -0.01    0.76
  -8  18  -4    0.83    0.78
   8  18   4   -0.11    0.71
  -7 -19   4    0.03    0.46
  -7 -19   4    1.69    0.84
   7 -19  -4    0.94    1.00
   7 -19  -4    0.20    0.51
   7  19  -4    0.71    0.75
  -7  19   4    0.62    0.82
  -5 -19   4    0.59    0.45
   5 -19  -4   -0.27    0.84
  -5 -19   4    0.42    0.72
  -5  19   4    0.63    0.74
   5  19  -4   -1.55    0.56
  -3 -19   4   -0.63    0.65
   3 -19  -4    1.67    0.94
  -3  19   4    0.12    0.69
   3  19  -4    0.48    0.68
  -1 -19   4    1.65    0.78
   1 -19  -4    0.26    0.83
  -1  19   4    1.95    0.89
   1  19  -4    2.34    0.84
  -1 -19  -4    1.70    0.92
   1 -19   4    2.43    0.92
   1  19   4   -0.08    0.59
  -1  19  -4   -0.47    0.61
   3 -19   4    0.92    0.79
  -3 -19  -4    1.61    0.87
   3  19   4    1.79    0.84
  -3  19  -4    1.16    0.80
   5 -19   4    0.79    0.91
  -5 -19  -4    1.01    0.87
  -5  19  -4    1.23    0.87
   5  19   4    1.41    0.78
   4 -20  -4    0.38    0.89
  -4 -20   4    1.01    0.78
  -4 -20   4    1.78    0.49
   4  20  -4    0.00    0.72
  -4  20   4    0.68    0.73
  -2 -20   4    0.89    0.82
   2 -20  -4    3.54    1.12
   2  20  -4    1.39    0.85
  -2  20   4    2.30    0.92
   0 -20  -4    0.64    0.91
   0 -20   4   -1.14    0.58
   0  20  -4    0.00    0.77
   0  20   4    0.25    0.77
  -2 -20  -4    0.89    0.89
   2 -20   4    0.45    0.80
  -2  20  -4   -0.01    0.68
   2  20   4    0.43    0.70
  -4 -20  -4    2.57    1.05
   4 -20   4    0.77    0.84
   4  20   4    0.73    0.78
  -4  20  -4    2.19    0.96
  -1 -21   4    0.15    0.71
   1 -21  -4   -0.57    0.82
  -1  21   4   -0.01    0.69
   1  21  -4   -0.40    0.69
   1 -21   4    0.69    0.80
  -1 -21  -4    2.73    1.09
  -1  21  -4   -0.21    0.69
   1  21   4    0.44    0.82
  14   0  -5    0.47    0.68
 -14   0   5    0.30    0.68
  12   0  -5    0.42    0.63
 -12   0   5    0.87    0.68
  10   0  -5    0.13    0.35
 -10   0   5   -0.84    0.50
  10   0  -5   -0.25    0.28
  10   0  -5   -0.29    0.48
   8   0  -5   -0.26    0.33
  -8   0   5   -0.27    0.54
   8   0  -5    0.42    0.53
   6   0  -5   -0.05    0.34
  -6   0   5    0.43    0.51
  -4   0   5   -0.29    0.39
  -4   0   5    0.19    0.35
   4   0  -5   -0.48    0.30
   2   0  -5   -0.01    0.27
  -2   0   5    0.18    0.31
   2   0  -5    0.07    0.34
   2   0  -5    0.18    0.38
   0   0  -5   -0.07    0.34
   0   0   5   -0.12    0.30
   0   0  -5    0.03    0.29
  -2   0  -5    0.41    0.39
   2   0   5   -0.20    0.33
   4   0   5    0.03    0.37
  -4   0  -5   -0.04    0.35
   4   0   5    0.03    0.34
  -6   0  -5   -0.69    0.41
  -6   0  -5    0.47    0.54
   6   0   5    0.80    0.48
   8   0   5   -0.23    0.48
  -8   0  -5    0.35    0.60
  -8   0  -5    0.11    0.52
 -10   0  -5   -0.81    0.57
 -10   0  -5   -0.85    0.48
  10   0   5    0.60    0.56
 -12   0  -5    0.71    0.70
  12   0   5    0.27    0.59
 -12   0  -5    1.47    0.78
 -14   0  -5   -0.19    0.72
 -14   0  -5   -0.33    0.58
  14   0   5    0.11    0.64
  15  -1  -5    7.87    1.31
 -15  -1   5    7.38    1.28
 -15   1   5    5.51    1.20
  15   1  -5    7.61    1.36
 -13  -1   5    2.41    0.88
  13  -1  -5    3.15    0.90
  13   1  -5    1.72    0.77
 -11  -1   5    1.69    0.73
  11  -1  -5    0.49    0.32
  11  -1  -5    0.02    0.59
 -11   1   5   -0.93    0.54
  11   1  -5    0.39    0.34
  11   1  -5    0.34    0.34
  11   1  -5   -0.09    0.62
   9  -1  -5   32.58    1.44
   9  -1  -5   32.87    1.86
   9  -1  -5   34.50    1.83
  -9  -1   5   33.38    1.89
   9   1  -5   29.70    1.82
  -9   1   5   34.20    1.96
   9   1  -5   33.66    1.46
  -7  -1   5    5.39    0.88
   7  -1  -5    3.92    0.65
   7  -1  -5    5.88    0.91
   7   1  -5    4.64    0.69
  -7   1   5    3.98    0.93
   7   1  -5    4.86    0.85
   5  -1  -5    3.76    0.66
  -5  -1   5    2.67    0.61
   5  -1  -5    4.17    0.71
  -5  -1   5    3.65    0.68
   5   1  -5    3.09    0.60
  -5   1   5    3.74    0.74
  -3  -1   5   87.10    3.02
   3  -1  -5   89.38    2.96
   3   1  -5   88.43    3.01
   3   1  -5   83.46    2.76
  -3   1   5   88.93    2.97
   1  -1  -5    4.97    0.68
  -1  -1   5    4.48    0.69
  -1   1   5    4.87    0.79
   1   1  -5    4.52    0.62
   1   1  -5    2.63    0.60
  -1   1   5    4.35    0.65
   1   1  -5    4.25    0.56
  -1  -1  -5   11.29    0.95
   1  -1   5   11.21    1.04
  -1  -1  -5   10.83    0.93
  -1   1  -5    9.15    0.75
  -1   1  -5   10.37    1.03
   1   1   5    9.48    1.05
  -1   1  -5    7.94    0.95
   1   1   5   10.09    0.92
  -3  -1  -5    7.54    0.82
   3  -1   5    7.53    0.91
   3  -1   5    7.85    0.75
  -3   1  -5    7.52    0.74
   3   1   5    7.82    0.84
   5  -1   5    0.44    0.48
  -5  -1  -5   -0.23    0.40
   5  -1   5   -0.29    0.34
  -5   1  -5   -0.52    0.44
  -5   1  -5   -0.20    0.37
   5   1   5    0.28    0.49
   5   1   5   -0.26    0.34
  -7  -1  -5    0.20    0.50
   7  -1   5    0.37    0.56
  -7   1  -5    1.16    0.54
  -7   1  -5    0.28    0.57
   7   1   5   -0.16    0.42
  -9  -1  -5    7.48    1.06
  -9  -1  -5    6.90    1.06
   9  -1   5    4.82    0.93
  -9   1  -5    4.66    1.01
   9   1   5    6.33    0.94
  -9   1  -5    5.45    0.97
  11  -1   5    3.49    0.90
 -11  -1  -5    5.34    1.03
 -11  -1  -5    5.56    1.02
 -11   1  -5    5.79    0.99
  11   1   5    4.32    0.92
 -11   1  -5    4.55    0.89
  13  -1   5   -0.66    0.51
 -13  -1  -5    0.25    0.61
 -13  -1  -5   -0.63    0.69
 -13   1  -5    0.73    0.63
  13   1   5    1.10    0.70
 -13   1  -5    0.12    0.73
  14  -2  -5    1.22    0.80
 -14  -2   5    1.34    0.73
  14   2  -5    1.30    0.82
 -14   2   5    1.29    0.82
  12  -2  -5    9.03    1.27
 -12  -2   5    5.83    1.05
 -12   2   5    3.33    0.88
  12   2  -5    3.51    0.95
  10  -2  -5   12.48    1.37
 -10  -2   5   12.53    1.36
  10  -2  -5    8.29    0.72
  10  -2  -5   11.09    0.81
  10   2  -5    9.94    0.80
 -10   2   5    9.86    1.29
  10   2  -5   10.55    0.95
  10   2  -5    9.71    1.30
  -8  -2   5    6.59    1.04
   8  -2  -5    6.47    0.78
   8  -2  -5    8.27    1.06
   8   2  -5    6.41    0.78
  -8   2   5    5.83    1.01
   8   2  -5    6.43    1.04
   6  -2  -5   11.46    1.12
  -6  -2   5    9.39    1.12
  -6  -2   5   11.36    1.10
  -6   2   5   11.64    1.21
   6   2  -5   10.74    1.00
  -4  -2   5    0.61    0.43
  -4  -2   5    0.61    0.46
   4   2  -5    0.52    0.42
  -4   2   5    0.80    0.43
  -2  -2   5   22.56    1.32
   2  -2  -5   22.97    1.30
   2   2  -5   22.28    1.06
  -2   2   5   23.15    1.39
   2   2  -5   27.27    1.41
   2   2  -5   22.18    1.13
  -2   2   5   25.03    1.25
   0  -2  -5   14.74    1.03
   0  -2   5   15.97    1.08
   0  -2  -5   15.30    0.91
   0   2  -5   16.30    1.15
   0   2   5   15.39    1.17
   0   2  -5   14.76    0.86
   0   2  -5   14.75    0.81
   0   2   5   15.58    0.94
   2  -2   5   -0.14    0.33
  -2  -2  -5    0.44    0.41
  -2  -2  -5    0.53    0.33
  -2   2  -5    0.28    0.30
  -2   2  -5   -0.17    0.26
  -2   2  -5    0.83    0.48
   2   2   5    0.14    0.35
   2   2   5    0.08    0.43
   4  -2   5   23.50    1.12
   4  -2   5   22.34    1.35
  -4  -2  -5   23.34    1.32
  -4   2  -5   25.08    1.15
  -4   2  -5   24.41    1.52
   4   2   5   23.31    1.52
   4   2   5   25.02    1.27
  -6  -2  -5    1.06    0.55
   6   2   5    1.15    0.61
  -6   2  -5    1.06    0.48
   6   2   5    1.44    0.52
  -6   2  -5    1.22    0.64
   8  -2   5    2.09    0.71
  -8  -2  -5    3.23    0.78
  -8   2  -5    2.88    0.66
  -8   2  -5    1.62    0.69
   8   2   5    2.41    0.71
   8   2   5    2.38    0.65
  10  -2   5    6.27    1.01
 -10  -2  -5    9.61    1.20
 -10   2  -5    6.96    1.08
 -10   2  -5    8.57    1.07
  10   2   5    6.50    0.97
  12  -2   5   -0.03    0.65
 -12  -2  -5   -0.17    0.61
 -12  -2  -5   -0.71    0.56
 -12   2  -5   -0.27    0.63
  12   2   5    0.81    0.64
 -12   2  -5   -0.56    0.53
 -14  -2  -5    0.62    0.63
  14  -2   5   -0.37    0.61
 -14  -2  -5   -0.99    0.69
 -14   2  -5    0.11    0.75
  14   2   5    1.80    0.73
 -14   2  -5    1.27    0.72
 -15  -3   5    1.41    0.81
  15  -3  -5    2.04    0.92
  15   3  -5    3.26    1.02
 -15   3   5    0.57    0.74
  13  -3  -5    2.12    0.87
 -13  -3   5    4.75    1.01
  13   3  -5    4.13    0.98
 -13   3   5    3.49    1.01
  11  -3  -5   -0.35    0.28
 -11  -3   5   -0.39    0.53
  11  -3  -5   -0.68    0.49
  11  -3  -5    0.50    0.32
  11   3  -5   -0.15    0.33
 -11   3   5   -0.55    0.57
  11   3  -5   -0.07    0.33
  11   3  -5    0.55    0.61
  -9  -3   5   49.09    2.30
   9  -3  -5   51.25    2.30
   9  -3  -5   48.96    1.91
  -9   3   5   47.82    2.42
   9   3  -5   53.08    2.47
   9   3  -5   53.59    1.95
  -7  -3   5    1.00    0.52
   7  -3  -5    0.09    0.51
   7   3  -5    0.13    0.40
  -7   3   5    0.06    0.53
  -5  -3   5   10.54    1.13
   5  -3  -5   11.46    0.95
  -5  -3   5   11.05    0.95
  -5   3   5   11.54    1.10
   5   3  -5   11.24    1.07
  -5   3   5   13.21    1.25
  -3  -3   5    2.49    0.62
  -3  -3   5    3.27    0.53
   3  -3  -5    2.87    0.67
   3   3  -5    2.52    0.59
   3   3  -5    2.87    0.47
  -3   3   5    3.36    0.67
   1  -3  -5   -0.24    0.24
  -1  -3   5   -0.75    0.27
   1  -3  -5    0.15    0.43
   1   3  -5    0.17    0.25
   1   3  -5    0.24    0.37
   1   3  -5   -0.26    0.28
  -1   3   5   -0.12    0.26
  -1   3   5    0.37    0.45
  -1  -3  -5    9.52    0.97
  -1  -3  -5    8.43    0.68
   1  -3   5   11.09    1.09
   1   3   5   10.68    1.12
   1   3   5    7.96    0.68
  -1   3  -5    9.15    1.06
  -1   3  -5    8.72    0.63
  -1   3  -5    7.87    0.58
  -3  -3  -5    8.83    0.68
   3  -3   5   10.22    1.08
  -3  -3  -5    9.57    1.03
   3   3   5    7.97    0.70
   3   3   5   10.66    1.22
  -3   3  -5   10.06    1.06
  -3   3  -5    9.51    1.07
   5  -3   5   19.12    1.00
  -5  -3  -5   19.15    1.30
   5  -3   5   17.63    1.52
   5   3   5   19.39    1.41
   5   3   5   17.56    1.06
  -5   3  -5   18.85    1.37
  -5   3  -5   18.27    1.01
  -7  -3  -5    5.75    0.94
   7  -3   5    6.20    0.94
  -7   3  -5    7.57    1.09
   7   3   5    7.76    1.08
  -7   3  -5    7.10    0.82
   7   3   5    5.41    0.75
  -9  -3  -5   -0.03    0.55
   9  -3   5    0.52    0.61
   9   3   5    1.83    0.71
  -9   3  -5    1.97    0.74
   9   3   5    2.83    0.68
  -9   3  -5    1.33    0.58
 -11  -3  -5    1.48    0.79
  11  -3   5    0.59    0.68
 -11   3  -5    1.64    0.70
 -11   3  -5    3.35    0.82
  11   3   5    1.27    0.63
 -13  -3  -5    1.52    0.93
 -13  -3  -5    0.54    0.66
  13  -3   5    0.34    0.67
  13   3   5    0.80    0.63
 -13   3  -5   -0.23    0.62
 -13   3  -5    0.59    0.64
  14  -4  -5    1.12    0.83
 -14  -4   5   -0.30    0.62
  14   4  -5    0.12    0.68
 -14   4   5   -0.46    0.66
 -12  -4   5    2.61    0.82
  12  -4  -5    3.65    0.95
  12   4  -5    4.16    0.55
 -12   4   5    3.98    1.00
  10  -4  -5   29.16    1.35
  10  -4  -5   26.21    1.26
  10  -4  -5   30.21    1.77
 -10  -4   5   27.61    1.76
 -10   4   5   28.04    1.90
  10   4  -5   30.76    1.92
  10   4  -5   31.00    1.35
   8  -4  -5    1.23    0.58
  -8  -4   5    0.66    0.55
  -8   4   5    0.37    0.63
   8   4  -5    0.21    0.45
   8   4  -5    0.98    0.64
  -8   4   5    0.74    0.46
   6  -4  -5    1.52    0.56
  -6  -4   5    0.93    0.51
  -6  -4   5    1.27    0.54
  -6   4   5    1.56    0.67
  -6   4   5    0.97    0.52
   6   4  -5    1.62    0.52
  -4  -4   5    0.39    0.39
   4  -4  -5   -0.52    0.43
  -4  -4   5    0.53    0.41
   4  -4  -5    0.35    0.38
   4   4  -5    0.39    0.31
   4   4  -5   -0.14    0.41
  -4   4   5   -0.11    0.43
   2  -4  -5   -0.37    0.37
  -2  -4   5   -0.20    0.37
   2  -4  -5    0.03    0.31
  -2   4   5   -0.26    0.40
  -2   4   5    0.08    0.29
   2   4  -5    0.01    0.38
   2   4  -5    0.24    0.32
   2   4  -5    0.03    0.24
   0  -4  -5   10.00    1.02
   0  -4  -5    8.18    0.66
   0  -4   5    8.29    0.98
   0   4   5    8.06    1.05
   0   4  -5    7.73    0.53
   0   4  -5    8.78    0.58
   0   4  -5    7.09    0.89
   0   4   5    9.16    0.67
  -2  -4  -5    0.37    0.47
  -2  -4  -5    0.91    0.32
   2  -4   5    1.37    0.54
   2   4   5    0.69    0.33
  -2   4  -5    0.91    0.27
  -2   4  -5    1.34    0.54
   2   4   5    0.04    0.45
  -4  -4  -5    0.65    0.52
   4  -4   5    1.31    0.35
  -4  -4  -5    1.54    0.37
  -4   4  -5    1.57    0.42
   4   4   5    0.92    0.39
   4   4   5    1.10    0.60
  -4   4  -5    1.17    0.57
  -6  -4  -5   16.70    1.48
   6  -4   5   18.77    1.04
   6  -4   5   17.83    1.37
   6   4   5   18.94    1.12
  -6   4  -5   19.90    1.05
  -6   4  -5   19.97    1.43
   6   4   5   20.76    1.50
   8  -4   5    2.42    0.76
  -8  -4  -5    2.15    0.77
   8   4   5    2.42    0.61
  -8   4  -5    2.29    0.61
   8   4   5    3.25    0.83
  -8   4  -5    2.50    0.80
  10  -4   5    0.25    0.59
 -10  -4  -5   -0.33    0.62
  10   4   5    0.84    0.50
 -10   4  -5   -0.20    0.52
  10   4   5   -0.32    0.52
 -10   4  -5    0.15    0.61
 -12  -4  -5   -0.37    0.64
  12  -4   5   -0.40    0.57
 -12   4  -5    0.99    0.64
  12   4   5    0.00    0.55
 -12   4  -5   -0.38    0.59
  14  -4   5    0.32    0.72
 -14  -4  -5   -0.11    0.62
 -14  -4  -5    0.43    0.80
 -14   4  -5    0.43    0.61
  14   4   5   -0.29    0.53
 -14   4  -5    0.98    0.76
  13  -5  -5    5.34    1.17
 -13  -5   5    4.93    1.03
  13   5  -5    4.81    1.06
 -13   5   5    3.68    1.03
 -11  -5   5    1.88    0.73
  11  -5  -5    1.45    0.38
  11  -5  -5    2.55    0.49
  11  -5  -5    2.28    0.77
  11   5  -5    2.16    0.51
  11   5  -5    3.33    0.93
 -11   5   5    2.35    0.85
   9  -5  -5   -0.18    0.50
  -9  -5   5    0.64    0.58
  -9   5   5    0.74    0.69
   9   5  -5    0.96    0.66
   9   5  -5    0.79    0.47
  -9   5   5    0.67    0.46
   7  -5  -5    6.25    0.86
  -7  -5   5    2.55    0.74
  -7  -5   5    3.67    0.73
  -7   5   5    3.77    0.89
  -7   5   5    4.96    0.81
   7   5  -5    3.97    0.70
  -5  -5   5    1.38    0.57
   5  -5  -5    0.89    0.46
  -5  -5   5    0.73    0.44
   5   5  -5    0.29    0.45
   5   5  -5    0.46    0.35
  -5   5   5    1.37    0.59
  -3  -5   5    8.02    0.71
   3  -5  -5    7.85    1.01
   3  -5  -5    8.58    0.83
   3  -5  -5    8.28    0.82
  -3  -5   5    6.79    0.96
  -3   5   5    6.71    0.95
   3   5  -5    7.15    0.61
   3   5  -5    6.75    0.88
   1  -5  -5    6.57    0.90
   1  -5  -5    7.86    0.72
  -1  -5   5    7.50    0.95
  -1   5   5    7.18    0.98
   1   5  -5    5.44    0.46
   1   5  -5    6.45    0.86
  -1   5   5    7.14    0.68
   1  -5   5   12.53    1.08
  -1  -5  -5   14.47    1.13
  -1  -5  -5   11.40    0.71
  -1   5  -5   11.82    1.16
   1   5   5   13.49    0.77
   1   5   5   12.26    1.25
  -3  -5  -5    7.61    0.97
  -3  -5  -5    6.10    0.54
   3  -5   5    8.28    1.12
   3   5   5    6.15    0.93
  -3   5  -5    7.34    1.00
   3   5   5    7.10    0.61
   5  -5   5   47.80    1.65
  -5  -5  -5   50.84    2.30
   5  -5   5   51.14    2.32
  -5  -5  -5   47.37    1.71
   5   5   5   50.54    1.83
   5   5   5   52.21    2.44
  -5   5  -5   54.36    1.96
  -5   5  -5   52.77    2.33
   7  -5   5    1.05    0.65
  -7  -5  -5    2.34    0.73
   7  -5   5   -0.17    0.37
  -7   5  -5    1.01    0.46
   7   5   5    1.61    0.49
   7   5   5    0.99    0.63
  -7   5  -5    0.33    0.59
   9  -5   5    0.50    0.63
  -9  -5  -5    0.54    0.65
   9   5   5    0.76    0.56
   9   5   5    0.81    0.51
  -9   5  -5   -0.01    0.46
  -9   5  -5   -0.02    0.56
  11  -5   5   -0.56    0.61
 -11  -5  -5    0.27    0.76
  11   5   5    1.04    0.57
 -11   5  -5    0.80    0.65
  11   5   5    1.22    0.70
 -11   5  -5   -0.38    0.54
 -13  -5  -5    0.40    0.77
  13  -5   5   -0.58    0.58
 -13   5  -5    0.69    0.68
 -13   5  -5    0.29    0.60
  13   5   5   -0.30    0.52
  13   5   5    0.35    0.65
  14  -6  -5   -0.50    0.56
 -14  -6   5   -0.01    0.64
  14   6  -5    0.88    0.76
 -14   6   5    0.09    0.75
 -12  -6   5   -0.16    0.57
  12  -6  -5    0.38    0.64
  12   6  -5   -0.62    0.35
 -12   6   5   -0.13    0.65
  12   6  -5   -0.09    0.67
  10  -6  -5    7.82    1.07
 -10  -6   5    8.11    1.09
 -10   6   5    8.25    0.90
 -10   6   5   11.15    1.41
  10   6  -5    8.79    0.89
  10   6  -5    9.46    1.32
   8  -6  -5    4.87    0.87
  -8  -6   5    4.88    0.83
   8   6  -5    5.63    0.80
  -8   6   5    4.74    0.97
  -8   6   5    5.60    0.82
  -6  -6   5    1.28    0.52
   6  -6  -5    1.06    0.47
  -6  -6   5    1.22    0.63
  -6   6   5    1.16    0.57
   6   6  -5    0.69    0.50
   4  -6  -5   -0.16    0.52
  -4  -6   5    0.18    0.37
  -4  -6   5   -0.46    0.39
   4  -6  -5    0.94    0.40
  -4   6   5    1.14    0.57
   4   6  -5    0.65    0.33
   4   6  -5    0.65    0.51
  -2  -6   5   -0.05    0.45
   2  -6  -5    0.31    0.31
   2  -6  -5   -0.14    0.26
   2  -6  -5    0.41    0.50
   2   6  -5    1.05    0.31
  -2   6   5    0.18    0.48
   0  -6  -5    4.07    0.83
   0  -6   5    4.19    0.80
   0  -6  -5    5.24    0.53
   0   6   5    3.72    0.76
   0   6   5    3.49    0.50
   0   6  -5    4.93    0.79
   2  -6   5    2.14    0.62
  -2  -6  -5    1.96    0.34
  -2  -6  -5    1.71    0.63
   2   6   5    2.00    0.37
   2   6   5    2.42    0.70
  -2   6  -5    2.05    0.63
  -4  -6  -5    5.22    0.51
   4  -6   5    3.29    0.78
  -4  -6  -5    4.92    0.85
  -4   6  -5    5.07    0.89
   4   6   5    3.82    0.49
   4   6   5    4.14    0.85
   6  -6   5    5.19    0.91
   6  -6   5    2.92    0.47
  -6  -6  -5    3.82    0.49
  -6  -6  -5    4.86    0.90
  -6   6  -5    4.14    0.76
  -6   6  -5    3.16    0.79
   6   6   5    3.67    0.85
   6   6   5    3.33    0.53
  -8  -6  -5    3.11    0.83
   8  -6   5    2.05    0.80
   8  -6   5    0.88    0.45
   8   6   5    1.44    0.71
  -8   6  -5    0.49    0.65
  -8   6  -5    1.38    0.51
   8   6   5    1.85    0.54
  10  -6   5   -0.14    0.57
 -10  -6  -5    0.56    0.75
  10   6   5    0.23    0.48
 -10   6  -5   -0.01    0.61
  10   6   5    1.36    0.70
 -10   6  -5    0.68    0.55
 -12  -6  -5   -0.30    0.79
  12  -6   5    0.34    0.70
 -12   6  -5    1.03    0.68
  12   6   5    0.08    0.50
  12   6   5    0.75    0.68
 -12   6  -5    1.23    0.67
  14  -6   5    0.39    0.80
 -14  -6  -5    0.48    0.88
  14   6   5    0.79    0.75
 -14   6  -5    1.52    0.76
  14   6   5    0.12    0.55
 -14   6  -5    1.69    0.79
 -13  -7   5    2.89    0.91
  13  -7  -5    2.47    0.83
  13   7  -5    2.02    0.53
 -13   7   5    0.83    0.80
  13   7  -5    1.76    0.83
  11  -7  -5    0.36    0.60
 -11  -7   5   -0.38    0.51
 -11   7   5   -1.06    0.55
  11   7  -5   -0.34    0.42
 -11   7   5   -0.39    0.40
  -9  -7   5    1.16    0.58
   9  -7  -5    1.91    0.64
  -9   7   5    1.10    0.70
   9   7  -5    2.42    0.76
   9   7  -5    1.33    0.56
  -9   7   5    0.30    0.50
  -7  -7   5    2.42    0.74
  -7  -7   5    3.31    0.68
   7  -7  -5    2.46    0.62
  -7   7   5    3.73    0.92
   7   7  -5    2.86    0.69
  -7   7   5    2.89    0.71
   5  -7  -5    0.97    0.69
   5  -7  -5    1.18    0.48
  -5  -7   5    0.64    0.53
  -5  -7   5    1.46    0.47
  -5   7   5    1.39    0.62
   5   7  -5    1.30    0.42
  -3  -7   5    0.07    0.43
  -3  -7   5    0.03    0.28
   3  -7  -5    0.16    0.30
   3  -7  -5    0.35    0.33
   3  -7  -5   -0.61    0.49
  -3   7   5   -0.13    0.73
   3   7  -5   -0.26    0.23
   3   7  -5    0.84    0.52
  -1  -7   5    9.28    1.10
   1  -7  -5    6.83    0.56
   1  -7  -5    7.61    0.65
   1  -7  -5    6.97    0.98
  -1   7   5    8.34    1.12
   1   7  -5    6.68    0.90
  -1  -7  -5    0.83    0.26
   1  -7   5    1.11    0.59
  -1  -7  -5    0.75    0.54
  -1   7  -5    0.82    0.55
   1   7   5    0.78    0.57
  -3  -7  -5    6.56    0.45
   3  -7   5    3.74    0.82
  -3  -7  -5    5.78    0.95
  -3   7  -5    8.06    1.08
   3   7   5    6.90    0.49
   3   7   5    8.34    1.15
   5  -7   5    1.97    0.74
  -5  -7  -5    2.68    0.39
  -5  -7  -5    2.30    0.72
   5   7   5    2.46    0.80
   5   7   5    4.18    0.73
  -5   7  -5    3.69    0.82
   7  -7   5    0.57    0.61
   7  -7   5    0.40    0.35
  -7  -7  -5    0.13    0.25
  -7  -7  -5    0.16    0.59
  -7   7  -5    0.00    0.58
   7   7   5    0.27    0.57
   7   7   5    0.40    0.37
  -7   7  -5    0.23    0.36
  -9  -7  -5    0.96    0.76
   9  -7   5    0.99    0.69
   9   7   5    0.22    0.43
  -9   7  -5    1.59    0.52
   9   7   5    1.74    0.74
  -9   7  -5    0.73    0.66
 -11  -7  -5    3.54    1.02
  11  -7   5    2.00    0.87
  11   7   5    3.51    0.88
 -11   7  -5    3.85    0.77
 -11   7  -5    4.08    0.91
  13  -7   5   -0.10    0.72
 -13  -7  -5    1.31    0.95
 -13   7  -5    1.33    0.73
  13   7   5   -0.01    0.67
 -13   7  -5   -0.11    0.63
  13   7   5    0.29    0.52
 -14  -8   5    2.05    0.83
  14  -8  -5    4.81    1.05
  14   8  -5    2.39    0.99
 -14   8   5    0.69    0.77
  12  -8  -5    0.28    0.55
 -12  -8   5   -0.12    0.59
  12   8  -5    0.16    0.48
 -12   8   5    0.96    0.82
  12   8  -5   -0.37    0.61
  10  -8  -5    0.83    0.62
 -10  -8   5    0.66    0.57
  10   8  -5    1.49    0.73
  10   8  -5    1.20    0.54
 -10   8   5    1.62    0.82
 -10   8   5    2.22    0.65
  -8  -8   5    6.56    0.91
   8  -8  -5    7.26    0.96
  -8  -8   5    6.08    1.06
  -8   8   5    6.35    0.93
   8   8  -5    6.52    0.88
  -8   8   5    8.99    1.29
   6  -8  -5    1.09    0.71
   6  -8  -5   -0.54    0.35
  -6  -8   5   -0.12    0.51
  -6  -8   5    0.02    0.41
  -6   8   5    0.15    0.52
   6   8  -5   -0.28    0.47
   4  -8  -5    1.57    0.45
  -4  -8   5    1.56    0.41
   4  -8  -5    1.81    0.46
  -4  -8   5    2.13    0.69
   4  -8  -5    2.11    0.76
   4   8  -5    1.33    0.62
  -4   8   5    0.89    0.58
   4   8  -5    1.03    0.37
  -2  -8   5    3.40    0.78
   2  -8  -5    4.82    0.52
   2  -8  -5    4.95    0.55
   2  -8  -5    5.23    0.93
   2   8  -5    2.66    0.72
  -2   8   5    3.61    0.77
   0  -8  -5    5.35    0.93
   0  -8  -5    4.98    0.44
   0  -8   5    4.06    0.82
   0   8  -5    4.80    0.84
   0   8   5    4.61    0.83
   2  -8   5    2.63    0.75
  -2  -8  -5    0.87    0.67
  -2   8  -5    1.24    0.60
   2   8   5    2.22    0.73
   4  -8   5    0.57    0.57
  -4  -8  -5   -0.46    0.55
   4   8   5   -0.17    0.52
  -4   8  -5   -0.22    0.54
   6  -8   5    1.20    0.67
  -6  -8  -5    0.78    0.69
  -6  -8  -5    1.44    0.31
   6   8   5    0.97    0.65
  -6   8  -5    0.88    0.64
   8  -8   5    1.92    0.49
  -8  -8  -5    2.54    0.81
   8  -8   5    1.28    0.75
  -8  -8  -5    1.82    0.40
  -8   8  -5    1.33    0.70
   8   8   5    3.25    0.85
   8   8   5    2.14    0.48
  -8   8  -5    3.06    0.55
 -10  -8  -5    0.01    0.66
  10  -8   5    0.39    0.72
 -10   8  -5   -0.23    0.49
  10   8   5    0.16    0.61
  10   8   5   -0.11    0.41
 -10   8  -5    1.48    0.75
 -12  -8  -5    0.17    0.75
  12  -8   5   -0.97    0.63
  12   8   5    0.66    0.72
 -12   8  -5    1.57    0.62
  12   8   5    1.17    0.59
 -12   8  -5    1.27    0.70
 -13  -9   5    2.50    0.78
  13  -9  -5    1.79    0.76
 -13   9   5    2.45    0.94
  13   9  -5    4.04    1.11
  13   9  -5    3.90    0.71
  11  -9  -5   -0.10    0.49
 -11  -9   5    0.33    0.55
 -11   9   5    0.20    0.48
  11   9  -5   -0.19    0.48
  11   9  -5   -0.54    0.56
 -11   9   5   -0.01    0.65
  -9  -9   5    9.13    1.06
   9  -9  -5    8.65    1.05
   9   9  -5    7.99    0.99
  -9   9   5    8.92    1.06
  -9   9   5    7.12    1.28
   9   9  -5    9.51    1.28
  -7  -9   5    2.33    0.61
   7  -9  -5    1.93    0.85
  -7  -9   5    1.19    0.68
   7  -9  -5    1.43    0.54
   7   9  -5    2.20    0.66
   5  -9  -5    4.54    0.65
   5  -9  -5    4.16    0.94
  -5  -9   5    4.98    0.64
  -5  -9   5    4.54    0.92
   5   9  -5    4.59    0.85
   5   9  -5    3.26    0.53
  -5   9   5    4.36    0.93
   3  -9  -5    0.94    0.33
  -3  -9   5    0.43    0.52
   3  -9  -5   -0.28    0.60
   3   9  -5    0.13    0.55
  -3   9   5    0.81    0.57
  -1  -9   5    3.37    0.78
   1  -9  -5    4.93    0.94
   1   9  -5    5.30    0.93
  -1   9   5    3.20    0.76
   1  -9   5   13.67    1.36
  -1  -9  -5   12.72    1.37
  -1   9  -5   10.59    1.18
   1   9   5   11.58    1.32
   3  -9   5    0.02    0.54
  -3  -9  -5   -0.07    0.56
  -3   9  -5   -0.04    0.53
   3   9   5   -0.59    0.45
   5  -9   5    2.18    0.80
  -5  -9  -5    3.30    0.86
   5   9   5    0.41    0.64
  -5   9  -5    2.34    0.77
  -7  -9  -5    0.92    0.30
   7  -9   5    1.98    0.79
  -7  -9  -5    1.31    0.80
  -7   9  -5    1.26    0.68
   7   9   5    0.36    0.62
   9  -9   5    2.44    0.57
   9  -9   5    4.20    0.99
  -9  -9  -5    2.84    0.57
  -9  -9  -5    2.95    0.90
  -9   9  -5    3.09    0.56
   9   9   5    3.17    0.55
  -9   9  -5    4.38    0.98
   9   9   5    3.60    0.93
  11  -9   5    6.84    1.29
 -11  -9  -5    6.13    1.21
 -11   9  -5    9.75    1.23
  11   9   5    9.12    1.35
  11   9   5    8.66    0.91
 -11   9  -5   12.37    1.09
 -13  -9  -5   -0.83    0.71
  13  -9   5   -0.38    0.76
 -13   9  -5    1.02    0.68
  13   9   5   -0.37    0.49
 -13   9  -5    0.36    0.67
  13   9   5    0.44    0.67
 -12 -10   5    1.28    0.68
  12 -10  -5    0.13    0.59
 -12  10   5    1.84    0.62
  12  10  -5    1.13    0.58
 -12  10   5    2.99    0.99
  12  10  -5    3.40    0.97
  10 -10  -5   -0.36    0.51
 -10 -10   5    0.00    0.52
 -10  10   5   -0.29    0.49
 -10  10   5   -0.20    0.65
  10  10  -5    0.19    0.57
  10  10  -5    0.26    0.52
   8 -10  -5    5.83    0.88
  -8 -10   5    3.81    0.94
  -8 -10   5    4.89    0.79
   8  10  -5    5.58    0.92
  -8  10   5    4.89    0.89
   6 -10  -5    1.27    0.48
  -6 -10   5    1.41    0.49
   6 -10  -5    2.07    0.88
  -6 -10   5    2.32    0.76
  -6  10   5    1.94    0.71
   6  10  -5    1.84    0.67
   4 -10  -5   65.98    2.17
  -4 -10   5   67.08    2.89
   4 -10  -5   67.80    2.97
   4 -10  -5   64.38    2.22
   4  10  -5   68.81    2.67
  -4  10   5   65.29    2.83
   2 -10  -5    2.84    0.37
   2 -10  -5    2.10    0.37
   2 -10  -5    2.09    0.82
  -2 -10   5    1.56    0.68
   2  10  -5    1.16    0.65
  -2  10   5    2.86    0.78
   0 -10  -5    0.59    0.68
   0 -10   5    0.01    0.55
   0  10  -5    0.27    0.57
   0  10   5    0.28    0.53
   2 -10   5    1.18    0.64
  -2 -10  -5    0.98    0.71
  -2  10  -5    0.12    0.60
   2  10   5    1.12    0.65
  -4 -10  -5   -0.21    0.60
   4 -10   5    0.99    0.67
  -4  10  -5    0.19    0.58
   4  10   5   -0.48    0.51
   6 -10   5    2.00    0.80
  -6 -10  -5    4.18    0.96
   6  10   5    3.04    0.89
  -6  10  -5    2.53    0.82
  -8 -10  -5   12.50    1.49
   8 -10   5    9.75    1.33
  -8  10  -5   11.02    1.33
   8  10   5    9.51    1.34
  10 -10   5    1.02    0.75
 -10 -10  -5   -0.33    0.67
  10  10   5    0.27    0.71
 -10  10  -5    2.05    0.58
  10  10   5    0.57    0.41
 -10  10  -5    0.55    0.69
  12 -10   5   -0.83    0.66
 -12 -10  -5    0.90    0.81
 -12  10  -5    1.38    0.81
 -12  10  -5    0.94    1.21
  12  10   5    0.79    0.72
  12  10   5    0.54    0.45
 -11 -11   5    0.41    0.56
  11 -11  -5    0.98    0.67
  11  11  -5   -0.40    0.50
 -11  11   5    0.01    0.80
  11  11  -5    0.38    0.66
  -9 -11   5    3.52    0.72
   9 -11  -5    7.15    0.95
  -9  11   5    3.63    0.88
   9  11  -5    5.42    0.88
   7 -11  -5   -0.07    0.42
   7 -11  -5   -0.03    0.74
  -7 -11   5    0.13    0.59
  -7 -11   5    0.39    0.46
  -7  11   5   -0.16    0.53
   7  11  -5    0.89    0.60
   5 -11  -5    1.42    0.45
  -5 -11   5    1.43    0.45
   5 -11  -5    1.61    0.83
  -5 -11   5    0.94    0.65
  -5  11   5    1.89    0.67
   5  11  -5    2.13    0.73
   5  11  -5    2.24    0.48
   3 -11  -5   27.11    1.38
   3 -11  -5   23.65    1.04
   3 -11  -5   23.56    1.80
  -3 -11   5   26.48    1.76
  -3  11   5   24.19    1.71
   3  11  -5   24.08    1.60
  -1 -11   5    3.71    0.86
   1 -11  -5    5.59    1.08
   1  11  -5    4.88    0.90
  -1  11   5    4.21    0.87
  -1 -11  -5    0.07    0.61
   1 -11   5    1.17    0.65
  -1  11  -5   -0.05    0.54
   1  11   5   -0.87    0.48
   3 -11   5    0.29    0.64
  -3 -11  -5   -0.47    0.62
  -3  11  -5   -0.86    0.50
   3  11   5    0.66    0.61
  -5 -11  -5    1.12    0.71
   5 -11   5    0.54    0.65
   5  11   5    0.56    0.65
  -5  11  -5    0.70    0.67
  -7 -11  -5   -0.67    0.61
   7 -11   5    0.80    0.74
  -7  11  -5    0.93    0.66
   7  11   5    0.14    0.63
   9 -11   5    6.88    1.24
  -9 -11  -5    9.83    1.43
   9  11   5    7.78    1.24
  -9  11  -5    7.11    1.10
  11 -11   5    3.77    1.15
 -11 -11  -5    4.16    1.12
  11  11   5    3.38    0.60
 -11  11  -5    4.83    1.00
  11  11   5    4.14    1.04
 -11  11  -5    6.02    0.84
  12 -12  -5    0.72    0.67
 -12 -12   5    0.52    0.65
  12  12  -5    0.42    0.62
 -12  12   5    0.44    0.85
 -12  12   5    1.04    1.05
  12  12  -5    1.35    0.85
 -10 -12   5    0.35    0.52
  10 -12  -5   -0.28    0.49
 -10  12   5   -0.36    0.50
  10  12  -5   -0.17    0.51
  10  12  -5   -0.36    0.71
  -8 -12   5   12.88    1.59
   8 -12  -5   10.35    1.08
  -8 -12   5   10.10    1.04
  -8  12   5    9.49    1.16
   8  12  -5   10.86    1.23
  -6 -12   5   -0.51    0.51
   6 -12  -5    0.27    0.71
  -6 -12   5    0.74    0.42
   6 -12  -5    0.87    0.47
  -6  12   5   -0.37    0.53
   6  12  -5    0.90    0.62
   4 -12  -5    5.16    0.54
  -4 -12   5    4.99    1.00
   4 -12  -5    2.92    0.96
  -4  12   5    3.93    0.92
   4  12  -5    2.10    0.76
   2 -12  -5   -0.04    0.65
  -2 -12   5    0.42    0.62
  -2  12   5    1.07    0.68
   2  12  -5   -0.25    0.58
   0 -12  -5    1.25    0.77
   0 -12   5    0.82    0.68
   0  12   5    1.50    0.71
   0  12  -5    0.68    0.64
  -2 -12  -5    0.22    0.66
   2 -12   5    0.07    0.57
  -2  12  -5    0.70    0.64
   2  12   5   -0.41    0.54
   4 -12   5    2.87    0.93
  -4 -12  -5    1.60    0.82
  -4  12  -5    1.57    0.79
   4  12   5    1.47    0.72
   6 -12   5    2.07    0.81
  -6 -12  -5    2.25    0.89
  -6  12  -5    2.00    0.82
   6  12   5    1.70    0.78
   8 -12   5   -0.77    0.61
  -8 -12  -5   -0.27    0.65
   8  12   5    0.60    0.66
  -8  12  -5   -0.42    0.58
 -10 -12  -5    3.32    1.02
  10 -12   5    2.97    1.01
  10  12   5    6.12    1.29
  11 -13  -5    1.59    0.93
 -11 -13   5    1.63    0.68
  11 -13  -5    1.84    0.75
  11  13  -5    2.07    0.77
  11  13  -5    4.04    1.11
 -11  13   5    2.97    0.83
  -9 -13   5    9.30    1.05
   9 -13  -5    9.84    1.08
   9 -13  -5   10.93    1.57
  -9  13   5    8.50    1.17
   9  13  -5   10.68    1.22
   7 -13  -5    1.19    0.50
  -7 -13   5    0.12    0.41
  -7 -13   5    0.11    0.59
  -7  13   5   -0.57    0.51
   7  13  -5   -0.20    0.59
   5 -13  -5    5.08    1.12
   5 -13  -5    4.91    0.65
  -5 -13   5    5.65    1.10
   5 -13  -5    7.07    0.71
  -5 -13   5    5.35    0.61
  -5  13   5    6.07    1.09
   5  13  -5    7.58    1.09
   5  13  -5    4.74    0.67
  -3 -13   5    0.16    0.63
   3 -13  -5    1.21    0.76
   3  13  -5    0.37    0.63
  -3  13   5    0.15    0.63
  -1 -13   5    2.12    0.80
   1 -13  -5    0.61    0.74
   1  13  -5    1.19    0.69
  -1  13   5   -0.13    0.56
   1 -13   5    1.29    0.78
  -1 -13  -5    1.88    0.88
   1  13   5    3.38    0.88
  -1  13  -5    2.67    0.85
  -3 -13  -5    0.79    0.72
   3 -13   5   -0.20    0.64
   3  13   5    0.26    0.59
  -3  13  -5    1.82    0.74
   5 -13   5   -0.51    0.57
  -5 -13  -5    0.18    0.67
  -5  13  -5   -0.68    0.58
   5  13   5   -0.48    0.53
   7 -13   5    0.53    0.73
  -7 -13  -5    1.14    0.83
  -7  13  -5    0.94    0.75
  -9 -13  -5    1.13    0.81
   9 -13   5    0.04    0.68
  -9  13  -5    0.99    0.76
   9  13   5   -0.10    0.69
  11 -13   5    0.45    0.79
  11  13   5   -0.58    0.58
 -10 -14   5    1.26    0.59
  10 -14  -5   -0.31    0.85
  10 -14  -5    0.32    0.59
  10  14  -5    1.58    0.86
  10  14  -5    0.06    0.60
 -10  14   5    1.28    0.69
   8 -14  -5    0.12    0.83
  -8 -14   5   -0.45    0.59
  -8 -14   5    0.09    0.42
   8 -14  -5    0.14    0.45
  -8  14   5    0.46    0.65
   8  14  -5   -0.46    0.57
  -6 -14   5    0.33    0.76
   6 -14  -5    0.56    0.41
  -6 -14   5    1.05    0.42
   6 -14  -5   -0.65    0.72
  -6  14   5    1.13    0.67
   6  14  -5   -0.30    0.60
   4 -14  -5    1.13    0.86
  -4 -14   5    0.74    0.68
  -4  14   5    0.85    0.68
   4  14  -5   -0.04    0.65
  -2 -14   5    1.14    0.70
   2 -14  -5    0.61    0.71
   2  14  -5    0.43    0.60
  -2  14   5    0.78    0.69
   0 -14  -5    1.09    0.77
   0 -14   5   -0.51    0.57
   0  14   5    0.39    0.67
   0  14  -5    1.19    0.68
   2 -14   5    8.56    1.33
  -2 -14  -5    7.44    1.28
  -2  14  -5    5.96    1.02
   2  14   5    5.75    1.12
   4 -14   5   -0.67    0.60
  -4 -14  -5    0.50    0.77
   4  14   5    0.71    0.68
  -4  14  -5   -0.37    0.63
   6 -14   5    1.03    0.78
  -6 -14  -5    0.95    0.79
   6  14   5    2.41    0.88
  -8 -14  -5    1.71    0.93
   8 -14   5    1.60    0.87
   8  14   5    3.28    1.03
  -8  14  -5    1.73    0.84
  10 -14   5   -1.02    0.72
 -10 -14  -5   -0.96    0.67
  10  14   5    0.73    0.87
 -10  14  -5    0.55    0.76
   9 -15  -5    0.78    1.02
  -9 -15   5    1.70    0.63
   9 -15  -5    1.56    0.64
  -9  15   5    1.35    0.74
   9  15  -5    2.18    0.78
   7 -15  -5    0.49    0.46
   7 -15  -5   -1.06    0.68
  -7 -15   5    0.05    0.62
  -7 -15   5    0.33    0.43
   7  15  -5    0.45    0.67
  -7  15   5   -0.76    0.53
   5 -15  -5    0.52    0.38
   5 -15  -5   -0.31    0.73
  -5  15   5   -0.12    0.55
   5  15  -5   -0.61    0.57
   3 -15  -5   -0.60    0.82
  -3 -15   5    0.84    0.73
  -3  15   5    0.78    0.65
   3  15  -5    0.69    0.72
   1 -15  -5    0.77    0.80
  -1 -15   5    1.11    0.78
  -1  15   5    0.68    0.72
   1  15  -5    1.62    0.74
   1 -15   5   -0.18    0.67
  -1 -15  -5    0.02    0.76
   1  15   5    0.57    0.56
  -1  15  -5    0.18    0.66
   3  15   5    3.88    1.64
  -5 -15  -5   -0.07    0.64
   5 -15   5   -0.72    0.64
  -5  15  -5    0.04    0.68
   5  15   5   -0.85    0.55
  -7 -15  -5    0.02    0.78
   7 -15   5    0.11    0.75
   7  15   5    0.02    0.63
  -7  15  -5    0.99    0.76
  -9 -15  -5    0.98    0.91
   9 -15   5    0.40    0.86
  -9  15  -5    0.47    0.78
   9  15   5    0.84    0.77
   8 -16  -5   -0.24    0.84
   8 -16  -5    2.04    0.64
  -8 -16   5    0.92    0.74
  -8  16   5    1.05    0.73
   8  16  -5    0.48    0.68
  -6 -16   5    2.36    0.88
   6 -16  -5    1.72    0.51
   6 -16  -5    2.60    1.07
  -6 -16   5    1.46    0.45
   6  16  -5    1.02    0.86
  -6  16   5    1.34    0.72
  -4 -16   5   -0.43    0.56
   4 -16  -5   -0.03    0.78
  -4  16   5    0.15    0.65
   4  16  -5    1.10    0.88
   2 -16  -5    1.40    0.88
   2  16  -5    1.36    0.86
  -2  16   5    1.42    0.75
   0 -16  -5   10.31    1.54
   0  16  -5   10.32    1.33
   0  16   5   10.49    2.29
   2 -16   5    0.31    0.76
  -2 -16  -5    2.33    0.91
  -2  16  -5    1.24    0.77
   2  16   5    2.04    0.87
  -4 -16  -5    0.45    0.78
   4 -16   5    0.55    0.75
  -4  16  -5   -0.76    0.59
   4  16   5    0.98    0.70
  -6 -16  -5   -0.47    0.72
   6 -16   5    1.57    0.94
   6  16   5   -0.01    0.68
  -6  16  -5   -0.02    0.67
  -8 -16  -5    0.76    0.91
   8 -16   5   -1.26    0.64
  -8  16  -5   -1.58    0.58
   8  16   5   -0.48    0.67
  -7 -17   5    1.02    0.86
  -7 -17   5    0.82    0.46
   7 -17  -5    0.66    0.85
   7 -17  -5    0.52    0.54
   7  17  -5   -0.59    0.66
  -5 -17   5    1.15    0.78
   5 -17  -5    0.12    0.78
   5  17  -5    0.00    0.69
  -5  17   5    0.01    0.64
   3 -17  -5    0.53    0.81
  -3 -17   5   -0.02    0.63
   3  17  -5    0.54    0.74
  -3  17   5   -0.19    0.69
   1 -17  -5    6.97    1.32
  -1 -17   5    4.85    1.10
   1  17  -5    6.13    1.16
  -1  17   5    3.39    0.96
   1 -17   5   -0.09    0.68
  -1 -17  -5   -1.21    0.66
   1  17   5    0.19    0.64
  -1  17  -5    0.61    0.80
   3 -17   5    0.98    0.74
  -3 -17  -5   -1.03    0.62
  -3  17  -5    0.04    0.68
   3  17   5    1.25    0.72
  -5 -17  -5    0.83    0.82
   5 -17   5    0.09    0.75
  -5  17  -5   -1.30    0.61
   5  17   5    0.14    0.66
  -7 -17  -5    0.61    0.89
   7 -17   5    0.97    0.91
  -7  17  -5    0.48    0.86
   7  17   5    2.65    1.01
   6 -18  -5    0.58    1.01
  -6 -18   5   -0.05    0.37
  -6 -18   5    0.67    0.71
  -6  18   5    0.01    0.76
   6  18  -5    0.08    0.69
  -4 -18   5    0.91    0.77
   4 -18  -5    0.12    0.82
   4  18  -5   -1.17    0.57
  -4  18   5    0.69    0.76
   2 -18  -5   -0.50    0.72
  -2 -18   5    0.12    0.74
   2  18  -5    0.43    0.71
  -2  18   5    1.07    0.79
   0 -18  -5    6.73    1.32
   0 -18   5    5.33    1.22
   0  18  -5    3.16    0.99
   0  18   5    4.20    1.11
   2 -18   5    0.12    0.72
  -2 -18  -5   -1.39    0.60
   2  18   5   -0.22    0.64
  -2  18  -5   -0.30    0.73
   4 -18   5   -0.91    0.64
  -4 -18  -5    0.48    0.81
  -4  18  -5    1.44    0.86
   4  18   5    0.03    0.70
  -3 -19   5    0.11    0.78
   3 -19  -5    0.52    0.96
   3  19  -5   -0.81    0.64
  -3  19   5   -0.29    0.72
   1 -19  -5    0.29    0.90
  -1 -19   5    0.75    0.80
   1  19  -5    0.54    0.78
  -1  19   5   -0.30    0.65
  -1 -19  -5    1.30    0.91
   1 -19   5    0.71    0.80
   1  19   5    1.41    0.87
  -1  19  -5    1.73    0.92
   3 -19   5   -0.37    0.75
  -3 -19  -5    0.51    0.87
   3  19   5    0.76    0.82
  -3  19  -5    0.31    0.85
 -14   0   6    2.12    0.90
  14   0  -6    0.66    0.75
 -12   0   6    0.67    0.75
  12   0  -6    0.52    0.64
  12   0  -6    0.75    0.39
  10   0  -6   42.20    1.75
  10   0  -6   41.81    2.27
 -10   0   6   36.14    2.17
   8   0  -6    3.02    0.64
  -8   0   6    2.05    0.75
   8   0  -6    2.82    0.79
   6   0  -6   36.35    1.90
  -6   0   6   31.85    2.06
   4   0  -6    2.76    0.70
   4   0  -6    3.19    0.74
  -4   0   6    2.97    0.70
   2   0  -6   14.81    1.39
   2   0  -6   14.48    1.11
  -2   0   6   13.95    1.08
   0   0  -6   40.28    2.04
   0   0  -6   40.67    1.76
   0   0   6   40.90    1.86
   2   0   6    0.98    0.51
  -2   0  -6    1.74    0.57
  -2   0  -6    2.36    0.74
   4   0   6    9.46    1.06
  -4   0  -6    8.90    1.20
  -4   0  -6    8.53    0.92
  -6   0  -6   13.65    1.13
   6   0   6   12.06    1.19
  -6   0  -6   11.66    1.33
  -8   0  -6    1.07    0.61
  -8   0  -6    1.17    0.72
   8   0   6    1.63    0.68
 -10   0  -6   -0.58    0.54
 -10   0  -6   -0.66    0.59
  10   0   6    0.68    0.61
 -12   0  -6    9.80    1.38
  12   0   6    9.36    1.27
 -12   0  -6   16.99    1.64
  13  -1  -6    2.45    0.94
 -13  -1   6    3.19    0.91
  13   1  -6    3.34    0.98
 -13   1   6    2.45    0.88
 -11  -1   6    1.27    0.74
  11  -1  -6    0.96    0.70
  11  -1  -6    1.84    0.49
  11   1  -6    1.48    0.50
 -11   1   6    0.85    0.68
  -9  -1   6    2.63    0.75
   9  -1  -6    2.26    0.58
   9  -1  -6    0.70    0.64
   9   1  -6    2.03    0.55
   9   1  -6    0.57    0.59
  -9   1   6   -0.40    0.65
  -7  -1   6    0.48    0.58
   7  -1  -6    1.71    0.58
   7  -1  -6    0.13    0.50
  -7   1   6   -0.21    0.55
   7   1  -6    1.26    0.62
   7   1  -6    0.66    0.49
   5  -1  -6    0.19    0.47
  -5  -1   6    0.08    0.45
  -5  -1   6   -0.39    0.49
   5   1  -6   -0.38    0.44
   3  -1  -6   10.99    1.19
   3  -1  -6    8.24    1.00
  -3  -1   6    7.24    0.98
   3   1  -6    9.42    0.99
  -3   1   6    8.28    0.96
   3   1  -6    8.47    1.03
  -1  -1   6    0.71    0.46
   1  -1  -6   -0.06    0.42
   1   1  -6    0.11    0.42
   1   1  -6    0.05    0.45
  -1   1   6    0.13    0.39
  -1  -1  -6    2.93    0.66
   1  -1   6    2.15    0.61
  -1   1  -6    2.12    0.53
   1   1   6    2.67    0.62
  -1   1  -6    2.95    0.78
  -1   1  -6    3.02    0.55
  -3  -1  -6    2.63    0.64
   3  -1   6    4.35    0.79
  -3   1  -6    3.33    0.61
  -3   1  -6    0.80    0.61
   3   1   6    2.81    0.66
   5  -1   6    0.80    0.55
  -5  -1  -6    0.60    0.51
  -5   1  -6    0.58    0.48
  -5   1  -6   -0.62    0.53
   5   1   6    0.93    0.51
  -7  -1  -6    0.96    0.62
  -7  -1  -6   -0.30    0.52
   7  -1   6    0.47    0.57
  -7   1  -6    0.27    0.60
  -7   1  -6   -0.10    0.50
   7   1   6   -0.14    0.47
  -9  -1  -6    1.10    0.75
   9  -1   6    0.59    0.56
  -9  -1  -6    0.13    0.62
  -9   1  -6   -0.28    0.53
  -9   1  -6   -0.42    0.53
   9   1   6    0.61    0.55
  11  -1   6    0.43    0.67
 -11  -1  -6   -0.60    0.61
 -11  -1  -6    0.22    0.61
 -11   1  -6    0.21    0.61
  11   1   6    1.09    0.65
 -11   1  -6    1.01    0.66
  13  -1   6    0.33    0.68
 -13   1  -6    0.99    0.83
  13   1   6   -0.51    0.91
  14  -2  -6   -0.08    0.64
 -14  -2   6   -0.47    0.62
 -14   2   6   -0.01    0.75
  14   2  -6   -0.38    0.65
 -12  -2   6    1.47    0.77
  12  -2  -6    2.08    0.45
  12  -2  -6    0.53    0.68
  12   2  -6    0.98    0.74
 -12   2   6    0.84    0.74
  12   2  -6    1.62    0.45
  10  -2  -6   12.72    0.98
  10  -2  -6   12.34    1.42
 -10  -2   6   11.73    1.29
  10   2  -6   14.30    1.59
  10   2  -6   12.91    1.00
 -10   2   6   11.79    1.44
   8  -2  -6   -0.06    0.41
  -8  -2   6    0.21    0.59
   8  -2  -6    0.47    0.55
   8   2  -6   -0.48    0.48
  -8   2   6    1.76    0.69
   8   2  -6    0.70    0.46
  -6  -2   6   12.44    1.38
  -6  -2   6   12.28    1.16
   6  -2  -6   13.00    1.29
   6   2  -6   10.03    1.11
  -6   2   6   12.73    1.33
   4  -2  -6    1.40    0.73
  -4  -2   6    1.76    0.60
   4   2  -6    1.42    0.57
   2  -2  -6    3.38    0.73
  -2  -2   6    3.79    0.79
   2   2  -6    2.67    0.58
   2   2  -6    3.21    0.75
  -2   2   6    3.48    0.82
   2   2  -6    3.40    0.54
  -2   2   6    2.73    0.63
   0  -2  -6    5.76    0.87
   0   2  -6    6.03    0.71
   0   2   6    6.09    0.99
   0   2   6    6.08    0.79
   0   2  -6    5.63    0.63
   0   2  -6    5.56    0.93
  -2  -2  -6   -0.01    0.46
  -2   2  -6    0.43    0.54
   2   2   6    0.06    0.34
  -2   2  -6    0.25    0.36
  -2   2  -6    0.13    0.33
   2   2   6    0.66    0.57
   4  -2   6    3.15    0.57
  -4  -2  -6    3.10    0.73
   4  -2   6    3.07    0.75
   4   2   6    3.20    0.64
  -4   2  -6    2.44    0.53
  -4   2  -6    3.02    0.82
   4   2   6    4.23    0.95
   6  -2   6   33.16    1.85
  -6  -2  -6   36.10    2.08
   6   2   6   31.63    2.01
   6   2   6   35.47    1.72
  -6   2  -6   32.98    1.57
  -6   2  -6   31.28    1.94
   8  -2   6    0.71    0.64
  -8  -2  -6    1.32    0.70
  -8   2  -6    1.53    0.60
   8   2   6    0.82    0.55
  -8   2  -6    1.09    0.65
 -10  -2  -6    2.50    0.89
  10  -2   6    2.73    0.82
 -10  -2  -6    1.45    0.76
  10   2   6    1.73    0.65
 -10   2  -6    1.28    0.73
 -10   2  -6    1.23    0.66
  12  -2   6    3.12    1.13
 -12  -2  -6    1.98    0.86
 -12  -2  -6    3.13    0.92
 -12   2  -6    2.76    0.89
  12   2   6    0.68    0.65
 -12   2  -6    2.04    0.84
 -13  -3   6    2.34    0.83
  13  -3  -6    3.33    0.93
 -13   3   6    3.32    0.97
  13   3  -6    4.60    0.60
  13   3  -6    3.37    0.97
  11  -3  -6   -0.09    0.55
  11  -3  -6    0.22    0.35
 -11  -3   6    0.21    0.65
  11   3  -6    0.44    0.68
  11   3  -6    0.32    0.42
 -11   3   6    0.82    0.72
   9  -3  -6   19.92    1.27
  -9  -3   6   19.73    1.50
   9  -3  -6   19.32    1.49
   9   3  -6   19.78    1.25
  -9   3   6   20.57    1.65
   9   3  -6   18.82    1.57
   7  -3  -6   24.28    1.57
   7  -3  -6   24.42    1.64
  -7  -3   6   23.09    1.71
  -7   3   6   27.29    1.76
   7   3  -6   25.00    1.61
  -5  -3   6    3.99    0.83
  -5  -3   6    3.49    0.72
   5  -3  -6    3.97    0.87
  -5   3   6    3.63    0.82
   5   3  -6    4.11    0.76
   3  -3  -6    1.15    0.91
  -3  -3   6    0.62    0.50
  -3   3   6    0.05    0.38
  -3   3   6    0.19    0.53
   3   3  -6    0.33    0.45
   3   3  -6   -0.19    0.26
   3   3  -6   -0.29    0.44
  -1  -3   6    4.27    0.80
   1  -3  -6    1.76    0.62
  -1   3   6    3.16    0.81
   1   3  -6    2.88    0.55
   1   3  -6    2.99    0.47
  -1   3   6    3.45    0.63
   1   3  -6    2.75    0.66
  -1  -3  -6    0.16    0.50
   1  -3   6    0.16    0.47
  -1   3  -6    1.22    0.60
  -1   3  -6    0.44    0.31
   1   3   6    0.81    0.42
   1   3   6   -0.38    0.50
  -1   3  -6    0.08    0.35
   3  -3   6    1.81    0.65
  -3  -3  -6    0.60    0.59
   3   3   6    0.70    0.44
  -3   3  -6    0.35    0.38
   3   3   6    1.17    0.66
  -3   3  -6    1.57    0.66
  -5  -3  -6   40.99    2.02
   5  -3   6   41.21    1.64
   5  -3   6   42.78    2.12
  -5   3  -6   40.76    1.65
  -5   3  -6   42.14    2.19
   5   3   6   39.65    2.23
   5   3   6   41.83    1.82
   7  -3   6   -0.23    0.53
  -7  -3  -6    0.18    0.57
  -7   3  -6    0.46    0.48
  -7   3  -6   -0.63    0.53
   7   3   6   -0.32    0.43
   7   3   6    0.68    0.60
  -9  -3  -6   -0.13    0.59
   9  -3   6   -0.10    0.58
   9   3   6   -0.20    0.43
  -9   3  -6   -0.27    0.50
  -9   3  -6    0.74    0.71
  11  -3   6    0.08    0.69
 -11  -3  -6   -0.21    0.60
 -11  -3  -6   -0.38    0.58
 -11   3  -6    0.76    0.69
  11   3   6    1.43    0.65
 -11   3  -6    0.53    0.68
 -13  -3  -6   -0.56    0.74
  13  -3   6   -0.81    0.52
 -13  -3  -6    0.39    0.73
 -13   3  -6   -0.02    0.67
 -13   3  -6    0.18    0.80
  13   3   6    0.44    0.61
  12  -4  -6    0.28    0.36
  12  -4  -6    0.42    0.71
 -12  -4   6    1.09    0.73
  12   4  -6    1.47    0.83
 -12   4   6   -0.23    0.64
  12   4  -6   -0.14    0.39
  10  -4  -6    1.21    0.67
  10  -4  -6    3.21    0.65
 -10  -4   6    2.32    0.78
  10   4  -6    2.04    0.58
  10   4  -6    3.94    1.03
 -10   4   6    1.83    0.86
  -8  -4   6   30.85    1.74
   8  -4  -6   28.02    1.71
   8   4  -6   27.08    1.85
  -8   4   6   31.37    1.96
   8   4  -6   31.54    1.62
   6  -4  -6   17.47    1.26
  -6  -4   6   16.65    1.36
  -6  -4   6   15.56    1.18
  -6   4   6   17.46    1.39
   6   4  -6   17.26    1.26
  -4  -4   6    6.90    1.03
   4  -4  -6   10.40    1.03
   4  -4  -6    7.81    1.10
  -4   4   6   10.61    1.21
   4   4  -6    8.12    1.09
   2  -4  -6    1.15    0.64
  -2  -4   6    0.65    0.54
   2   4  -6    1.83    0.48
  -2   4   6   -0.16    0.46
   2   4  -6    0.93    0.36
  -2   4   6    1.33    0.48
   2   4  -6    1.23    0.62
   0  -4   6    3.60    0.76
   0  -4  -6    4.35    0.84
   0   4  -6    3.71    0.45
   0   4  -6    3.89    0.61
   0   4   6    3.64    0.59
   0   4   6    4.55    0.92
   0   4  -6    2.81    0.76
  -2  -4  -6   19.58    1.79
   2  -4   6   15.49    1.26
   2   4   6   16.90    1.04
  -2   4  -6   17.25    1.02
  -2   4  -6   17.22    1.40
   2   4   6   17.46    1.46
  -4  -4  -6   43.04    2.03
   4  -4   6   40.95    2.10
   4   4   6   40.79    2.25
  -4   4  -6   40.85    1.49
  -4   4  -6   39.68    2.12
   4   4   6   42.08    1.72
  -4   4  -6   37.82    1.48
   6  -4   6   21.68    1.61
   6  -4   6   19.53    1.09
  -6  -4  -6   22.33    1.56
  -6   4  -6   20.45    1.13
   6   4   6   22.06    1.70
   6   4   6   22.15    1.28
  -6   4  -6   19.89    1.58
  -8  -4  -6    0.90    0.68
   8  -4   6    0.32    0.62
   8   4   6    0.31    0.49
  -8   4  -6    1.43    0.72
  -8   4  -6    0.21    0.46
   8   4   6    0.30    0.62
 -10  -4  -6   -0.80    0.55
  10  -4   6    0.35    0.63
  10   4   6   -0.25    0.57
  10   4   6   -0.37    0.46
 -10   4  -6   -0.17    0.66
 -12  -4  -6    1.48    0.88
  12  -4   6    0.11    0.72
 -12   4  -6    2.02    0.76
 -12   4  -6    2.04    0.89
  12   4   6    0.85    0.64
 -13  -5   6    0.80    0.67
  13  -5  -6    0.34    0.67
 -13   5   6    0.73    0.80
  13   5  -6   -0.66    0.40
  13   5  -6    0.39    0.72
  11  -5  -6    2.36    0.56
  11  -5  -6    1.93    0.75
 -11  -5   6    2.30    0.79
  11   5  -6    2.12    0.59
  11   5  -6    1.36    0.79
 -11   5   6    1.58    0.80
   9  -5  -6   -0.16    0.51
  -9  -5   6   -0.25    0.49
  -9   5   6   -0.52    0.60
   9   5  -6   -0.25    0.61
   9   5  -6    0.24    0.47
  -7  -5   6   12.92    1.22
   7  -5  -6   12.98    1.28
  -7  -5   6   13.30    1.45
   7   5  -6   13.01    1.22
  -7   5   6   15.68    1.46
  -5  -5   6    2.01    0.57
   5  -5  -6    1.79    0.78
  -5  -5   6    1.90    0.66
   5  -5  -6    2.23    0.62
  -5   5   6    2.56    0.76
   5   5  -6    1.30    0.60
   3  -5  -6    0.34    0.38
  -3  -5   6   -0.17    0.44
   3  -5  -6   -0.25    0.55
  -3   5   6    0.05    0.50
   3   5  -6   -0.05    0.27
   3   5  -6   -0.64    0.44
   3   5  -6   -1.00    0.34
   1  -5  -6    0.64    0.59
  -1  -5   6   -0.35    0.47
   1   5  -6    1.46    0.65
   1   5  -6    0.89    0.36
  -1   5   6    1.11    0.43
  -1   5   6    0.66    0.63
  -1  -5  -6    1.23    0.39
   1  -5   6    1.21    0.60
  -1  -5  -6    1.15    0.66
  -1   5  -6    1.35    0.64
   1   5   6    2.18    0.74
   1   5   6    0.39    0.37
  -3  -5  -6    0.59    0.31
  -3  -5  -6    1.00    0.62
   3  -5   6    0.62    0.52
  -3   5  -6    1.06    0.64
   3   5   6    1.39    0.65
   3   5   6    0.12    0.34
   5  -5   6   10.44    1.33
  -5  -5  -6   12.04    1.32
  -5   5  -6    9.89    0.87
  -5   5  -6   10.38    1.27
   5   5   6   11.01    0.94
   5   5   6   11.71    1.45
   7  -5   6    1.50    0.71
  -7  -5  -6    1.16    0.67
   7  -5   6    0.53    0.41
  -7   5  -6    0.81    0.66
   7   5   6    1.37    0.71
  -7   5  -6    0.56    0.46
   7   5   6    0.50    0.45
   9  -5   6    0.93    0.65
  -9  -5  -6    0.73    0.69
   9   5   6    1.38    0.75
  -9   5  -6    0.95    0.76
  -9   5  -6    1.17    0.59
   9   5   6    0.70    0.54
 -11  -5  -6    0.19    0.88
  11  -5   6    1.03    0.77
 -11   5  -6    0.26    0.63
 -11   5  -6    1.18    0.63
  11   5   6    0.00    0.49
 -12  -6   6    1.92    0.76
  12  -6  -6    1.45    0.78
  12  -6  -6    1.19    0.44
  12   6  -6    1.45    0.57
 -12   6   6    0.61    0.74
  12   6  -6    2.26    0.94
  10  -6  -6    1.03    0.65
 -10  -6   6    0.29    0.58
 -10   6   6    0.90    0.87
  10   6  -6    0.93    0.68
  10   6  -6    0.33    0.49
  -8  -6   6   38.93    2.22
   8  -6  -6   39.43    1.99
  -8   6   6   39.64    2.31
   8   6  -6   42.13    1.93
  -8   6   6   40.79    2.06
  -6  -6   6    1.93    0.59
  -6  -6   6    2.99    0.80
   6  -6  -6    3.67    0.98
  -6   6   6    2.72    0.75
   6   6  -6    1.43    0.63
  -4  -6   6    8.18    1.10
   4  -6  -6    8.19    0.91
   4  -6  -6    7.19    1.13
  -4   6   6    6.86    1.08
   4   6  -6    8.70    1.05
   4   6  -6    6.66    0.67
  -2  -6   6    0.59    0.53
   2  -6  -6    0.93    0.67
   2  -6  -6   -0.05    0.34
   2   6  -6    0.42    0.26
   2   6  -6    0.18    0.51
  -2   6   6   -0.57    0.48
   0  -6   6   11.46    1.29
   0  -6  -6   13.23    1.40
   0  -6  -6    9.24    0.73
   0   6  -6   10.21    1.19
   0   6   6   10.96    0.78
   0   6   6   10.32    1.29
  -2  -6  -6    3.10    0.83
   2  -6   6    4.45    0.88
  -2  -6  -6    3.90    0.50
  -2   6  -6    4.06    0.88
   2   6   6    3.51    0.54
   2   6   6    3.54    0.87
  -4  -6  -6   30.78    1.26
   4  -6   6   30.51    1.91
  -4  -6  -6   35.02    1.95
   4   6   6   32.32    1.36
   4   6   6   33.92    2.08
  -4   6  -6   37.67    2.04
  -6  -6  -6    0.00    0.58
   6  -6   6   -0.02    0.59
  -6   6  -6    1.24    0.69
   6   6   6    0.80    0.40
   6   6   6   -0.48    0.53
   8  -6   6   -0.16    0.58
  -8  -6  -6    0.80    0.73
   8  -6   6    0.57    0.40
   8   6   6    0.22    0.44
  -8   6  -6    0.27    0.42
   8   6   6    0.24    0.57
  -8   6  -6    1.01    0.71
 -10  -6  -6   -0.07    0.71
  10  -6   6    0.27    0.65
  10   6   6   -0.90    0.52
  10   6   6    0.21    0.55
 -10   6  -6    0.13    0.50
 -10   6  -6    0.86    0.71
 -12  -6  -6    5.04    1.20
  12  -6   6    4.34    1.11
  12   6   6    4.37    1.07
  12   6   6    2.58    0.73
 -12   6  -6    4.56    0.97
 -12   6  -6    4.71    0.88
 -13  -7   6   -0.19    0.71
  13  -7  -6    0.40    0.73
  13   7  -6   -0.25    0.48
  13   7  -6    0.47    0.77
 -13   7   6    1.11    0.80
 -11  -7   6    1.97    0.74
  11  -7  -6    1.77    0.76
 -11   7   6    2.05    0.88
  11   7  -6    1.72    0.59
  11   7  -6    1.44    0.79
  -9  -7   6    1.25    0.63
   9  -7  -6    2.24    0.70
  -9   7   6    1.49    0.85
  -9   7   6    2.30    0.69
   9   7  -6    1.13    0.57
  -7  -7   6    6.65    0.89
   7  -7  -6    5.28    1.08
   7  -7  -6    5.22    0.86
  -7  -7   6    6.22    1.06
   7   7  -6    8.55    1.05
  -7   7   6    6.08    1.01
   5  -7  -6    3.47    0.90
   5  -7  -6    3.43    0.65
  -5  -7   6    4.25    0.66
  -5  -7   6    4.64    0.93
   5   7  -6    3.00    0.76
  -5   7   6    3.66    0.86
   5   7  -6    4.13    0.60
   3  -7  -6    3.72    0.89
   3  -7  -6    5.65    0.72
  -3  -7   6    6.22    1.03
  -3   7   6    5.63    1.01
   3   7  -6    6.30    0.98
   1  -7  -6   17.22    1.57
   1  -7  -6   15.04    0.90
   1  -7  -6   15.46    0.90
  -1  -7   6   15.75    1.37
   1   7  -6   15.32    1.47
  -1   7   6   16.65    1.59
  -1  -7  -6    2.05    0.40
  -1  -7  -6    1.73    0.72
   1  -7   6    2.45    0.79
   1   7   6    1.93    0.78
   1   7   6    2.31    0.41
  -1   7  -6    1.90    0.75
  -3  -7  -6    3.53    0.88
  -3  -7  -6    2.33    0.38
   3  -7   6    4.53    0.93
   3   7   6    2.98    0.46
  -3   7  -6    2.94    0.77
   3   7   6    1.64    0.73
  -5  -7  -6    0.51    0.64
   5  -7   6    0.63    0.65
  -5  -7  -6    1.62    0.35
  -5   7  -6    0.70    0.62
   5   7   6    0.26    0.58
   5   7   6    0.51    0.34
   7  -7   6    0.20    0.63
  -7  -7  -6    1.53    0.82
  -7   7  -6    1.73    0.76
   7   7   6    0.57    0.40
   7   7   6    0.82    0.70
  -9  -7  -6    1.30    0.85
   9   7   6    3.32    0.92
  -9   7  -6    2.17    0.85
   9   7   6    2.29    0.58
  -9   7  -6    3.26    0.61
 -11  -7  -6    0.67    0.84
  11  -7   6   -0.13    0.72
 -11   7  -6    0.81    0.83
  11   7   6   -1.01    0.58
  11   7   6    0.54    0.52
 -11   7  -6    0.63    0.55
 -12  -8   6    0.96    0.69
  12  -8  -6    0.97    0.73
  12  -8  -6    2.07    0.53
 -12   8   6    0.38    0.84
  12   8  -6   -0.07    0.71
  12   8  -6    1.64    0.63
  10  -8  -6    0.88    0.65
 -10  -8   6    0.27    0.54
  10   8  -6   -0.63    0.48
 -10   8   6    0.20    0.54
  10   8  -6   -0.35    0.57
 -10   8   6    1.06    0.78
   8  -8  -6    3.30    0.98
   8  -8  -6    3.29    0.73
  -8  -8   6    2.95    0.94
  -8  -8   6    3.41    0.73
   8   8  -6    3.93    0.79
  -8   8   6    3.70    0.83
   6  -8  -6    0.92    0.50
   6  -8  -6   -0.25    0.70
  -6  -8   6    1.02    0.49
  -6  -8   6    0.10    0.58
   6   8  -6    0.64    0.59
  -6   8   6   -0.75    0.52
   4  -8  -6   10.77    0.95
  -4  -8   6    8.00    1.16
   4  -8  -6    7.17    1.22
   4   8  -6    7.94    1.12
   4   8  -6    7.50    0.68
  -4   8   6    9.65    1.30
   2  -8  -6   44.87    2.34
   2  -8  -6   45.58    1.69
   2  -8  -6   46.27    1.68
  -2  -8   6   49.23    2.40
   2   8  -6   47.70    2.25
  -2   8   6   39.62    2.29
   0  -8  -6    7.62    0.66
   0  -8   6    7.77    1.19
   0  -8  -6    6.87    0.60
   0  -8  -6    7.29    1.16
   0   8  -6    7.73    1.12
   0   8   6    7.32    1.19
   2  -8   6    0.31    0.56
  -2  -8  -6    0.73    0.69
  -2   8  -6    1.76    0.73
   2   8   6    1.00    0.69
  -4  -8  -6    0.82    0.64
   4  -8   6    0.58    0.65
   4   8   6    0.99    0.71
  -4   8  -6    0.93    0.67
   6  -8   6    0.29    0.61
  -6  -8  -6    1.26    0.78
  -6  -8  -6    0.32    0.35
   6   8   6    0.63    0.34
   6   8   6   -0.15    0.63
  -6   8  -6    0.15    0.60
   8  -8   6    0.35    0.70
  -8  -8  -6    0.67    0.67
   8   8   6    0.01    0.54
  -8   8  -6   -0.46    0.57
   8   8   6    0.29    0.39
 -10  -8  -6    6.23    1.24
  10  -8   6    2.39    0.92
  10   8   6    3.68    0.68
 -10   8  -6    4.84    0.69
  10   8   6    3.11    1.02
 -10   8  -6    4.96    1.35
  11  -9  -6    1.89    0.72
 -11  -9   6    1.19    0.66
 -11   9   6    0.61    0.58
 -11   9   6   -0.92    0.64
  11   9  -6    0.36    0.72
  11   9  -6    0.63    0.61
  -9  -9   6    0.00    0.55
   9  -9  -6   -0.05    0.50
   9  -9  -6    2.00    0.90
  -9   9   6    0.56    0.60
   9   9  -6    1.14    0.61
  -7  -9   6    4.53    1.02
   7  -9  -6    5.16    1.21
  -7  -9   6    6.37    0.84
   7  -9  -6    7.20    0.90
  -7   9   6    4.85    0.94
   7   9  -6    5.77    0.94
   5  -9  -6    3.49    0.98
  -5  -9   6    2.89    0.52
  -5  -9   6    4.64    1.00
   5  -9  -6    3.63    0.63
   5   9  -6    2.90    0.52
   5   9  -6    3.83    0.84
  -5   9   6    4.09    0.95
   3  -9  -6    3.67    0.96
   3  -9  -6    2.81    0.54
  -3  -9   6    3.44    0.92
   3  -9  -6    4.05    0.56
   3   9  -6    3.39    0.83
  -3   9   6    4.15    0.96
  -1  -9   6    1.38    0.69
   1  -9  -6    0.87    0.73
   1  -9  -6    1.37    0.36
  -1   9   6    1.21    0.75
   1   9  -6    2.32    0.82
   1  -9   6    8.26    1.19
  -1  -9  -6    6.20    1.14
  -1   9  -6    8.51    1.16
   1   9   6    7.22    1.13
  -3  -9  -6   10.73    1.37
   3  -9   6    7.11    1.15
   3   9   6    8.54    1.24
  -3   9  -6    9.52    1.22
   5  -9   6    0.05    0.62
  -5  -9  -6   -0.35    0.56
  -5   9  -6    0.20    0.62
   5   9   6    0.41    0.69
  -7  -9  -6    2.94    0.93
   7  -9   6    2.17    0.85
  -7   9  -6    3.46    0.93
   7   9   6    3.15    1.00
  -9  -9  -6    1.95    0.92
   9  -9   6    0.91    0.79
   9   9   6    1.14    0.45
   9   9   6    1.95    0.85
  -9   9  -6    2.31    1.13
 -11  -9  -6    3.14    1.10
  11  -9   6    3.44    1.11
  11   9   6    4.21    1.07
 -11   9  -6    4.00    1.00
  11   9   6    3.34    0.67
 -11   9  -6    3.93    0.71
  10 -10  -6   11.05    1.24
 -10 -10   6    8.65    1.11
  10  10  -6    7.90    1.34
 -10  10   6    7.72    1.11
  10  10  -6    9.46    1.12
   8 -10  -6    4.02    1.14
  -8 -10   6    3.53    0.72
   8 -10  -6    4.51    0.79
  -8 -10   6    3.70    0.97
  -8  10   6    3.81    0.91
   8  10  -6    4.85    0.89
  -6 -10   6    2.59    0.56
   6 -10  -6    1.34    0.50
  -6 -10   6    3.12    0.97
   6 -10  -6    0.96    0.78
   6  10  -6    2.16    0.74
  -6  10   6    2.73    0.84
  -4 -10   6    3.62    0.91
   4 -10  -6    4.59    0.63
   4 -10  -6    3.68    1.01
   4 -10  -6    2.53    0.70
   4  10  -6    3.80    0.89
  -4  10   6    4.05    0.97
  -2 -10   6   27.75    1.88
   2 -10  -6   26.10    1.10
   2 -10  -6   27.74    1.23
   2 -10  -6   26.50    1.92
  -2  10   6   27.25    1.93
   2  10  -6   28.86    1.80
   0 -10  -6   -0.52    0.57
   0 -10   6    0.98    0.68
   0  10   6    0.55    0.64
   0  10  -6    0.80    0.68
  -2 -10  -6    0.61    0.70
   2 -10   6    0.62    0.64
   2  10   6    0.17    0.65
  -2  10  -6    0.45    0.63
   4 -10   6    0.71    0.69
  -4 -10  -6    0.02    0.62
   4  10   6    0.11    0.61
  -4  10  -6   -0.55    0.57
   6 -10   6    1.05    0.75
  -6 -10  -6    1.76    0.83
  -6  10  -6    0.76    0.73
   6  10   6    1.51    0.72
   8 -10   6    1.50    0.85
  -8 -10  -6    1.29    0.83
  -8  10  -6    1.46    0.81
   8  10   6    0.01    0.62
  10 -10   6    1.50    0.91
 -10 -10  -6    1.67    0.96
  10  10   6    1.21    0.78
  10  10   6    1.31    0.46
 -10  10  -6    2.50    0.87
  11 -11  -6    0.55    0.61
  11 -11  -6    1.01    0.96
 -11 -11   6    0.29    0.55
 -11  11   6   -0.42    0.52
  11  11  -6   -0.80    0.50
  11  11  -6    0.31    0.73
  -9 -11   6    0.15    0.51
   9 -11  -6    0.17    0.79
   9 -11  -6    0.63    0.55
   9  11  -6    0.00    0.60
  -9  11   6   -0.36    0.56
  -7 -11   6    0.27    0.45
   7 -11  -6    0.72    0.82
  -7 -11   6    2.29    0.87
   7  11  -6    0.27    0.59
  -7  11   6    0.42    0.67
  -5 -11   6    0.80    0.69
   5 -11  -6   -0.02    0.74
   5 -11  -6   -0.10    0.34
  -5  11   6    0.14    0.63
   5  11  -6    0.34    0.60
   3 -11  -6    2.04    0.39
  -3 -11   6    1.55    0.76
   3 -11  -6    2.64    0.95
   3 -11  -6    1.85    0.44
  -3  11   6    2.37    0.83
   3  11  -6    0.98    0.67
   1 -11  -6   12.25    1.55
  -1 -11   6    9.58    1.31
   1  11  -6   10.61    1.34
  -1  11   6    9.25    1.33
   1 -11   6    2.04    0.82
  -1 -11  -6    2.52    0.89
   1  11   6    1.11    0.68
  -1  11  -6    1.73    0.75
   3 -11   6   -0.43    0.58
  -3 -11  -6    0.44    0.72
  -3  11  -6    1.71    0.78
   3  11   6    0.62    0.64
   5 -11   6   -0.60    0.75
  -5 -11  -6    0.72    0.79
   5  11   6    1.75    1.25
  -5  11  -6    1.21    0.75
  -7 -11  -6    0.00    0.72
   7 -11   6   -0.14    0.67
   7  11   6   -0.88    0.51
  -7  11  -6    1.27    0.75
  -9 -11  -6    0.77    0.80
   9 -11   6    1.68    0.86
   9  11   6    2.10    0.88
  -9  11  -6    0.85    0.80
  10 -12  -6    0.10    0.55
 -10 -12   6    0.20    0.55
  10 -12  -6    1.42    0.91
  10  12  -6    0.01    0.81
  10  12  -6   -0.45    0.58
 -10  12   6    0.58    0.65
  -8 -12   6    0.15    0.47
   8 -12  -6    0.22    0.46
  -8 -12   6    0.27    0.69
   8 -12  -6    0.86    0.87
  -8  12   6   -0.09    0.59
   8  12  -6   -0.07    0.60
  -6 -12   6    0.80    0.42
   6 -12  -6    0.63    0.84
   6 -12  -6    0.75    0.43
  -6 -12   6    0.15    0.61
   6  12  -6    1.11    0.67
  -6  12   6   -0.16    0.62
   4 -12  -6    0.16    0.72
   4 -12  -6    1.10    0.43
   4 -12  -6    1.23    0.37
  -4 -12   6    0.66    0.68
  -4  12   6   -0.67    0.56
   4  12  -6    1.63    0.78
   2 -12  -6    2.97    0.95
  -2 -12   6    5.01    1.01
   2  12  -6    4.44    0.96
  -2  12   6    2.61    0.84
   0 -12   6    0.60    0.66
   0 -12  -6   -0.04    0.67
   0  12   6    1.01    0.67
   0  12  -6    0.09    0.64
  -2 -12  -6    0.00    0.66
   2 -12   6    0.65    0.74
  -2  12  -6    2.11    0.81
   2  12   6    0.38    0.61
   4 -12   6   -0.25    0.86
  -4 -12  -6    1.55    0.82
   4  12   6    0.86    0.97
   6 -12   6    3.69    1.02
  -6 -12  -6    5.30    1.17
  -6  12  -6    4.19    0.99
   6  12   6    5.00    1.11
   8 -12   6    6.56    1.31
  -8 -12  -6    5.96    1.23
   8  12   6    4.98    1.14
  -8  12  -6    7.32    1.18
  -9 -13   6    0.12    0.51
   9 -13  -6    0.22    0.55
   9 -13  -6   -0.81    0.84
  -9 -13   6    0.03    0.74
   9  13  -6   -0.57    0.58
  -9  13   6   -0.08    0.66
   7 -13  -6    0.41    0.46
   7 -13  -6    0.59    0.89
  -7 -13   6   -0.22    0.64
  -7 -13   6    0.45    0.43
   7  13  -6   -0.14    0.62
  -7  13   6   -0.42    0.56
   5 -13  -6    8.79    0.72
  -5 -13   6    8.13    1.32
   5 -13  -6    8.44    1.41
  -5  13   6    6.35    1.12
   5  13  -6   10.00    1.24
  -3 -13   6    1.43    0.91
   3 -13  -6    1.11    1.15
   3  13  -6    0.92    0.68
  -3  13   6    2.79    0.94
  -1 -13   6    7.96    2.11
   1 -13  -6    5.99    1.24
   1  13  -6    6.46    1.11
  -1  13   6    3.52    0.97
  -1 -13  -6    0.65    0.81
   1  13   6    0.87    0.83
  -3 -13  -6    3.84    1.18
   3 -13   6    3.42    0.93
  -3  13  -6    2.58    0.91
   3  13   6    0.97    0.71
  -5 -13  -6   -0.43    0.63
   5 -13   6    0.85    0.76
  -5  13  -6    0.06    0.64
   5  13   6    0.02    0.64
  -7 -13  -6    2.31    0.95
   7 -13   6    3.08    1.05
  -7  13  -6    3.15    0.98
   7  13   6    1.17    0.83
  -8 -14   6    0.20    0.67
   8 -14  -6    0.26    0.50
  -8 -14   6    0.65    0.49
   8 -14  -6    1.70    1.07
  -8  14   6   -0.01    0.68
   8  14  -6   -0.34    0.68
   6 -14  -6    0.81    0.45
   6 -14  -6    0.79    0.91
  -6 -14   6   -0.08    0.64
   6  14  -6   -0.31    0.77
  -6  14   6    1.40    0.80
  -4 -14   6    3.44    0.93
   4 -14  -6    3.75    1.10
  -4  14   6    2.04    0.88
   4  14  -6    1.11    0.86
  -2 -14   6    2.69    0.96
   2 -14  -6    3.05    1.01
  -2  14   6    0.57    0.86
   2  14  -6    4.16    1.00
   0 -14  -6   -0.15    0.74
   0 -14   6    0.03    0.64
   0  14  -6    0.74    0.75
   0  14   6    1.06    0.71
   2 -14   6    1.23    0.79
  -2 -14  -6   -0.37    0.75
  -2  14  -6    0.22    0.67
   2  14   6    1.65    0.81
   4 -14   6    3.00    0.99
  -4 -14  -6    1.17    0.89
   4  14   6    2.13    0.89
  -4  14  -6    2.72    0.85
   6 -14   6    5.27    1.29
  -6 -14  -6    5.37    1.20
   6  14   6    6.36    1.29
  -6  14  -6    5.83    1.20
   8 -14   6    0.74    0.82
  -8 -14  -6    0.65    0.87
   8  14   6    0.28    0.76
  -8  14  -6   -0.57    0.74
   7 -15  -6    0.13    0.45
  -7 -15   6    0.10    0.40
  -7 -15   6    0.28    0.74
   7 -15  -6    2.91    1.12
   7  15  -6   -0.80    0.67
  -7  15   6   -0.11    0.87
  -5 -15   6    0.02    0.67
   5 -15  -6   -1.18    0.65
   5  15  -6   -0.19    0.67
  -5  15   6   -0.85    0.71
  -3 -15   6    6.11    1.24
   3 -15  -6    7.68    1.38
   3  15  -6    7.26    1.18
  -3  15   6    5.32    1.12
   1 -15  -6    2.60    0.95
  -1 -15   6    5.05    1.14
   1  15  -6    4.15    1.00
  -1  15   6    1.46    0.84
  -1 -15  -6    1.75    0.92
   1 -15   6    2.23    0.88
  -1  15  -6    0.79    0.72
   1  15   6    2.61    0.92
   3 -15   6    4.15    1.11
  -3 -15  -6    2.00    0.94
  -3  15  -6    2.35    0.87
   3  15   6    3.35    0.99
  -5 -15  -6    1.13    0.86
   5 -15   6    0.72    0.79
  -5  15  -6    0.19    0.75
   5  15   6   -0.50    0.59
   7 -15   6    0.87    0.88
  -7 -15  -6   -0.30    0.74
   7  15   6    0.08    0.73
  -6 -16   6    0.84    0.75
   6 -16  -6    0.00    0.81
   6  16  -6    0.88    0.83
  -6  16   6   -0.40    0.67
  -4 -16   6    7.34    1.30
   4 -16  -6    8.15    1.45
  -4  16   6    5.40    1.12
   4  16  -6    6.72    1.17
  -2 -16   6    1.14    0.82
   2 -16  -6    0.04    0.75
   2  16  -6    0.02    0.69
  -2  16   6    0.15    0.66
   0 -16   6    9.30    1.45
   0 -16  -6    8.26    1.44
   0  16   6    8.15    1.39
   0  16  -6    7.18    1.23
  -2 -16  -6    2.23    0.96
   2 -16   6    0.68    0.79
   2  16   6    0.86    0.82
  -2  16  -6    0.92    0.80
   4 -16   6   -0.09    0.74
  -4 -16  -6    0.94    0.86
  -4  16  -6    0.10    0.75
   4  16   6    0.90    0.82
   3 -17  -6    1.06    0.91
  -3 -17   6    1.85    0.94
  -3  17   6    0.91    0.78
   3  17  -6    0.23    0.75
   1 -17  -6    0.82    0.94
  -1 -17   6    2.55    1.02
   1  17  -6    5.32    1.13
  -1  17   6    2.71    1.01
  -1 -17  -6    3.19    1.08
   1 -17   6    4.22    1.13
   1  17   6    5.23    1.22
  -1  17  -6    4.99    1.14
   3 -17   6    1.53    0.91
  -3 -17  -6    2.88    1.10
   3  17   6    1.25    0.84
  -3  17  -6    1.89    0.92
  12   0  -7    1.26    0.82
 -12   0   7    0.13    0.66
  12   0  -7    0.03    0.44
 -10   0   7   -0.22    0.66
  10   0  -7   -0.17    0.59
  10   0  -7    0.61    0.45
   8   0  -7    0.66    0.61
   8   0  -7    0.03    0.44
  -8   0   7    0.46    0.67
   6   0  -7   -0.08    0.46
   6   0  -7    0.73    0.60
   6   0  -7    0.13    0.51
  -4   0   7    0.51    0.51
   4   0  -7   -0.37    0.46
   4   0  -7    0.84    0.60
   2   0  -7    0.49    0.48
   2   0  -7   -0.94    0.44
  -2   0   7    0.24    0.43
   0   0  -7   -0.46    0.44
   0   0   7    0.56    0.51
   0   0  -7    0.52    0.58
  -2   0  -7   -0.41    0.44
   2   0   7    0.15    0.41
  -2   0  -7   -0.60    0.48
   4   0   7    0.29    0.43
  -4   0  -7   -0.02    0.46
  -4   0  -7    0.80    0.66
   6   0   7   -0.10    0.49
  -6   0  -7    0.02    0.59
   8   0   7    0.30    0.58
  -8   0  -7   -0.46    1.08
  -8   0  -7   -0.52    0.56
 -10   0  -7    0.35    0.72
 -10   0  -7    0.62    0.71
  10   0   7   -0.04    0.59
 -11  -1   7    0.44    0.70
  11  -1  -7   -0.24    0.60
  11  -1  -7    0.51    0.46
  11   1  -7    0.00    0.66
  11   1  -7   -0.06    0.44
 -11   1   7   -0.20    0.58
  -9  -1   7    1.37    0.73
   9  -1  -7    2.05    0.81
   9  -1  -7    3.41    0.70
   9   1  -7    1.74    0.61
  -9   1   7    1.59    0.80
   9   1  -7    3.19    0.93
  -7  -1   7    5.96    1.01
   7  -1  -7    4.24    0.81
   7  -1  -7    4.28    0.89
   7   1  -7    3.05    0.73
   7   1  -7    4.03    0.90
   5  -1  -7    6.64    1.06
   5  -1  -7    6.36    1.00
  -5  -1   7    4.64    0.88
   5   1  -7    5.60    0.91
   5   1  -7    5.12    0.89
  -3  -1   7   -0.45    0.44
   3  -1  -7   -0.13    0.54
   3  -1  -7    0.39    0.53
   3   1  -7   -0.12    0.52
  -3   1   7    0.77    0.54
   3   1  -7   -0.27    0.47
   1  -1  -7   32.75    1.71
   1  -1  -7   29.31    1.87
  -1  -1   7   29.91    1.72
   1   1  -7   28.42    1.55
  -1   1   7   31.98    1.67
   1   1  -7   30.63    1.89
  -1  -1  -7    4.02    0.78
   1  -1   7    3.75    0.76
  -1  -1  -7    2.31    0.80
  -1   1  -7    3.43    0.89
  -1   1  -7    2.32    0.60
   1   1   7    3.77    0.70
   3  -1   7    2.68    0.69
  -3  -1  -7    2.80    0.85
  -3  -1  -7    2.71    0.67
   3   1   7    3.03    0.69
  -3   1  -7    1.48    0.70
  -3   1  -7    2.57    0.63
   5  -1   7    2.72    0.74
  -5  -1  -7    2.37    0.82
  -5  -1  -7    3.24    0.76
   5   1   7    2.53    0.67
  -5   1  -7    1.56    0.77
  -5   1  -7    2.39    0.65
  -7  -1  -7    0.65    0.60
  -7  -1  -7   -0.19    0.69
   7  -1   7    0.43    0.60
  -7   1  -7    0.77    0.65
  -7   1  -7   -0.34    0.95
   7   1   7   -0.57    0.47
  -9  -1  -7   -1.64    0.52
   9  -1   7   -0.31    0.52
  -9  -1  -7    0.19    0.71
  -9   1  -7    0.07    0.59
  -9   1  -7    0.13    0.58
   9   1   7   -0.07    0.53
 -11  -1  -7    3.13    0.97
 -11  -1  -7    2.23    0.89
  11  -1   7    2.32    0.92
  11   1   7    2.73    0.84
 -11   1  -7    3.01    0.83
 -11   1  -7    1.77    0.84
 -12  -2   7   -0.27    0.61
  12  -2  -7    0.59    0.44
  12  -2  -7    0.00    0.64
  12   2  -7    0.09    0.73
  12   2  -7   -0.50    0.64
 -12   2   7   -1.28    0.57
 -10  -2   7    3.56    0.94
  10  -2  -7    3.22    0.66
  10   2  -7    3.22    0.98
 -10   2   7    2.71    0.85
  10   2  -7    4.24    0.75
  -8  -2   7    1.81    0.70
   8  -2  -7    2.77    0.68
   8  -2  -7    2.46    0.78
   8   2  -7    2.95    0.73
  -8   2   7    1.49    0.81
   8   2  -7    2.83    0.81
   6  -2  -7   -0.49    0.40
   6  -2  -7    0.51    0.63
  -6  -2   7    0.45    0.58
   6  -2  -7    0.24    0.47
   6   2  -7   -0.24    0.47
  -4  -2   7    0.24    0.48
   4  -2  -7    0.89    0.64
   4  -2  -7    0.75    0.59
   4   2  -7   -0.36    0.47
   4   2  -7    0.36    0.52
  -2  -2   7    6.27    1.00
   2  -2  -7    6.58    0.97
   2   2  -7    6.72    0.84
  -2   2   7    8.73    1.03
   2   2  -7    7.38    1.13
   0  -2   7    0.23    0.52
   0   2  -7    0.39    0.44
   0   2  -7   -0.56    0.50
   0   2   7    0.23    0.43
   2  -2   7    2.17    0.69
   2   2   7    2.27    0.61
  -2   2  -7    0.90    0.70
  -2   2  -7    1.30    0.49
   4  -2   7    1.08    0.57
  -4  -2  -7    0.45    0.52
  -4   2  -7    0.91    0.67
  -4   2  -7    0.48    0.44
   6  -2   7    3.87    0.89
  -6  -2  -7    3.76    0.84
  -6  -2  -7    3.33    0.87
   6   2   7    3.08    0.73
  -6   2  -7    3.49    0.68
  -6   2  -7    1.65    0.79
   8  -2   7    0.01    0.53
  -8  -2  -7    0.67    0.70
  -8  -2  -7   -0.25    0.60
   8   2   7    0.47    0.51
  -8   2  -7    1.05    0.83
 -10  -2  -7    0.02    0.69
  10  -2   7    0.68    0.79
 -10  -2  -7   -0.04    0.67
 -10   2  -7   -0.37    0.63
 -10   2  -7    0.84    0.67
  10   2   7    0.06    0.52
 -11  -3   7    4.06    0.93
  11  -3  -7    6.77    1.22
  11  -3  -7    4.64    0.76
  11   3  -7    3.77    0.75
 -11   3   7    3.69    1.00
  11   3  -7    4.10    1.05
  -9  -3   7    0.70    0.62
   9  -3  -7    0.45    0.48
   9  -3  -7    0.43    0.64
   9   3  -7    0.37    0.49
  -9   3   7    0.42    0.68
   9   3  -7   -0.18    0.59
   7  -3  -7   12.41    1.34
   7  -3  -7   11.67    1.27
  -7  -3   7   10.15    1.14
   7  -3  -7   10.75    1.34
   7   3  -7   10.54    1.20
   5  -3  -7    0.47    0.62
   5  -3  -7   -0.01    0.43
   5  -3  -7   -0.97    0.38
  -5  -3   7   -0.45    0.46
   5   3  -7    0.08    0.50
   5   3  -7   -0.62    0.44
  -3  -3   7    1.50    0.64
   3  -3  -7    1.56    0.66
   3   3  -7    0.70    0.58
  -3   3   7    1.18    0.56
   3   3  -7    1.01    0.52
   1  -3  -7    0.91    0.61
  -1  -3   7    0.51    0.50
   1   3  -7    0.33    0.41
  -1   3   7    1.07    0.49
  -1   3   7    0.94    0.68
   1   3  -7    0.83    0.65
   1   3  -7    0.62    0.35
  -1  -3  -7    0.73    0.61
   1  -3   7    1.65    0.63
   1   3   7    1.04    0.48
  -1   3  -7    0.41    0.60
  -1   3  -7    0.07    0.38
   1   3   7    1.48    0.73
  -1   3  -7    1.38    0.39
   3  -3   7    6.05    1.03
  -3  -3  -7    8.37    1.08
  -3   3  -7    6.74    1.09
   3   3   7    5.53    0.78
  -3   3  -7    5.14    0.63
  -3   3  -7    5.69    0.68
   3   3   7    6.05    1.13
   5  -3   7    0.33    0.58
  -5  -3  -7   -0.13    0.56
  -5   3  -7    0.38    0.45
  -5   3  -7    0.35    0.61
   5   3   7    0.39    0.64
   5   3   7    0.21    0.42
   7  -3   7    1.38    0.67
  -7  -3  -7    0.08    0.60
   7   3   7    1.19    0.58
  -7   3  -7    1.05    0.56
  -7   3  -7   -0.51    0.63
   9  -3   7    1.12    0.75
  -9  -3  -7   -0.47    0.58
  -9  -3  -7    0.27    0.68
   9   3   7    1.57    0.66
  -9   3  -7    1.37    0.83
  -9   3  -7   -0.69    0.62
  11  -3   7   -0.15    0.69
 -11  -3  -7   -0.18    0.61
 -11   3  -7   -0.14    0.62
  11   3   7   -0.95    0.46
 -11   3  -7   -0.08    0.71
  10  -4  -7    0.75    0.66
 -10  -4   7    0.65    0.65
  10  -4  -7    0.54    0.48
  10   4  -7    0.86    0.55
  10   4  -7    0.23    0.64
 -10   4   7    0.33    0.76
   8  -4  -7   10.39    1.28
  -8  -4   7    9.74    1.14
   8  -4  -7    9.40    1.14
   8   4  -7    9.54    1.09
   6  -4  -7    6.29    1.13
  -6  -4   7    2.34    0.78
   6  -4  -7    5.54    0.91
   6   4  -7    5.42    0.90
   4  -4  -7    2.32    0.62
   4  -4  -7    1.21    0.66
  -4  -4   7    1.05    0.63
   4   4  -7    0.33    0.59
   4   4  -7    1.81    0.56
  -4   4   7    1.64    0.75
  -2  -4   7    0.08    0.50
   2  -4  -7   -0.88    0.49
  -2   4   7   -0.47    0.34
   2   4  -7   -0.21    0.27
   2   4  -7   -0.70    0.35
   2   4  -7   -0.62    0.47
  -2   4   7    0.72    0.68
   0  -4  -7    0.52    0.57
   0  -4   7   -0.77    0.43
   0   4   7    0.50    0.43
   0   4   7    0.08    0.55
   0   4  -7    0.27    0.36
   0   4  -7    1.35    0.67
   2  -4   7    0.04    0.55
  -2  -4  -7   -0.81    0.48
   2   4   7   -0.42    0.54
  -2   4  -7    0.71    0.65
   2   4   7    0.00    0.37
  -4  -4  -7    0.68    0.62
   4  -4   7    1.15    0.66
   4   4   7    1.49    0.76
  -4   4  -7    1.60    0.77
  -4   4  -7    0.93    0.41
   4   4   7    0.78    0.44
   6  -4   7    5.82    1.07
  -6  -4  -7    7.15    1.13
  -6   4  -7    6.65    1.10
   6   4   7    3.86    0.72
   6   4   7    6.28    1.20
  -6   4  -7    5.50    0.69
   8  -4   7    2.25    0.81
  -8  -4  -7    4.49    1.01
   8   4   7    2.27    0.68
   8   4   7    3.37    1.00
  -8   4  -7    1.32    0.76
  -8   4  -7    1.88    0.64
 -10  -4  -7   -0.51    0.67
  10  -4   7    0.40    0.73
  10   4   7    0.06    0.52
 -10   4  -7    0.25    0.70
 -10   4  -7    0.25    0.60
  11  -5  -7    5.36    1.03
  11  -5  -7    5.14    0.82
 -11  -5   7    3.64    0.89
 -11   5   7    3.97    1.08
  11   5  -7    4.21    0.78
  11   5  -7    4.79    1.13
   9  -5  -7   10.26    1.16
  -9  -5   7   10.42    1.21
   9  -5  -7   12.19    1.37
   9   5  -7   12.67    1.26
   9   5  -7    9.71    1.44
   7  -5  -7   14.36    1.26
  -7  -5   7   15.86    1.68
   7  -5  -7   15.22    1.72
  -7  -5   7   13.38    1.38
   7   5  -7   17.26    1.33
   5  -5  -7    0.55    0.47
  -5  -5   7    0.11    0.58
   5  -5  -7   -0.33    0.63
   5   5  -7    0.54    0.51
  -5   5   7    0.23    0.63
   5   5  -7   -0.55    0.45
  -3  -5   7    0.62    0.59
   3  -5  -7    0.60    0.63
   3  -5  -7    1.33    0.53
   3   5  -7    0.75    0.63
   3   5  -7    0.38    0.44
   3   5  -7    1.04    0.40
  -3   5   7    0.40    0.65
  -1  -5   7    0.56    0.57
   1  -5  -7    0.29    0.59
   1   5  -7    1.00    0.63
  -1   5   7   -0.23    0.58
   1   5  -7   -0.02    0.28
  -1   5   7    0.43    0.40
  -1  -5  -7    0.22    0.58
   1  -5   7   -0.49    0.49
  -1   5  -7    0.82    0.67
   1   5   7    0.94    0.66
   1   5   7   -0.09    0.36
  -3  -5  -7    0.84    0.70
   3  -5   7    0.44    0.53
   3   5   7    2.33    0.86
   3   5   7    1.18    0.46
  -3   5  -7    0.38    0.66
  -5  -5  -7    0.49    0.59
   5  -5   7   -0.24    0.51
  -5   5  -7    0.04    0.64
   5   5   7    0.53    0.42
   5   5   7    0.00    0.59
   7  -5   7   26.23    1.91
  -7  -5  -7   26.94    1.85
  -7   5  -7   23.82    1.91
   7   5   7   29.44    2.11
   7   5   7   27.03    1.46
   9  -5   7    1.67    0.79
  -9  -5  -7    2.44    0.91
   9   5   7    3.66    1.03
   9   5   7    2.03    0.65
  -9   5  -7    3.99    1.02
  -9   5  -7    2.91    0.67
  10  -6  -7    2.27    0.65
 -10  -6   7    2.40    0.78
  10  -6  -7    1.74    0.78
  10   6  -7    2.73    0.74
  10   6  -7    0.90    0.76
   8  -6  -7   -0.18    0.45
   8  -6  -7   -0.72    0.92
  -8  -6   7   -0.10    0.50
   8   6  -7   -0.05    0.58
   6  -6  -7    1.50    0.59
  -6  -6   7    0.79    0.61
   6  -6  -7    0.71    0.78
  -6  -6   7    1.42    0.60
  -6   6   7    1.57    0.74
   6   6  -7    2.52    0.72
   4  -6  -7    0.01    0.42
  -4  -6   7    0.34    0.56
   4  -6  -7    0.41    0.64
   4   6  -7    0.56    0.37
   4   6  -7   -0.20    0.52
   4   6  -7    0.51    0.44
  -4   6   7   -0.06    0.59
   2  -6  -7    0.27    0.42
  -2  -6   7   -0.20    0.47
   2  -6  -7    0.08    0.63
   2   6  -7    0.77    0.61
  -2   6   7    0.14    0.58
   0  -6  -7    0.16    0.61
   0  -6   7    0.44    0.59
   0   6   7    0.68    0.63
   0   6  -7    0.51    0.67
   0   6   7    0.48    0.40
   2  -6   7    2.14    0.73
  -2  -6  -7    1.87    0.72
   2   6   7    1.21    0.72
  -2   6  -7    1.77    0.82
   2   6   7    1.39    0.45
   4  -6   7    0.87    0.70
  -4  -6  -7    2.54    0.79
  -4   6  -7    3.33    0.89
   4   6   7    1.55    0.46
   4   6   7    2.34    0.85
  -6  -6  -7    1.88    0.78
   6  -6   7    1.40    0.83
  -6   6  -7    3.22    1.23
   6   6   7    3.38    0.62
   6   6   7    2.59    0.91
   8  -6   7    0.25    0.66
  -8  -6  -7    1.20    0.77
   8   6   7    0.68    0.52
   8   6   7   -0.11    0.63
  -8   6  -7    0.64    0.72
 -10  -6  -7   -0.31    0.74
  10  -6   7    0.13    0.72
  10   6   7   -1.02    0.53
  10   6   7    0.03    0.52
 -10   6  -7    0.03    0.50
 -10   6  -7   -0.05    0.66
  11  -7  -7    1.58    0.60
 -11  -7   7   -0.18    0.65
  11  -7  -7    1.80    0.77
  11   7  -7    0.97    0.81
  11   7  -7    0.70    0.61
  -9  -7   7   -0.47    0.51
   9  -7  -7    0.29    0.57
   9  -7  -7    1.89    0.92
   9   7  -7   -0.60    0.49
   9   7  -7   -0.52    0.65
  -7  -7   7    0.65    0.65
   7  -7  -7   -0.14    0.71
  -7  -7   7    0.47    0.51
   7  -7  -7    0.28    0.48
   7   7  -7    0.65    0.63
  -7   7   7   -0.83    0.49
  -5  -7   7    3.13    0.88
   5  -7  -7    2.38    0.65
   5  -7  -7    4.15    1.03
   5   7  -7    4.10    0.87
  -5   7   7    2.70    0.85
   5   7  -7    3.67    0.64
   3  -7  -7   -0.16    0.63
  -3  -7   7    0.03    0.55
   3  -7  -7    0.84    0.48
   3   7  -7    1.15    0.71
  -3   7   7    0.86    0.68
  -1  -7   7   -1.17    0.43
   1  -7  -7   -0.33    0.59
   1  -7  -7   -0.06    0.36
   1   7  -7   -0.29    0.59
  -1   7   7   -0.88    0.56
  -1  -7  -7    1.55    0.41
  -1  -7  -7    0.87    0.70
   1  -7   7    1.04    0.69
  -1   7  -7    0.47    0.58
   1   7   7    2.05    0.83
  -3  -7  -7    2.45    0.44
   3  -7   7    2.12    0.76
  -3  -7  -7    3.13    0.88
   3   7   7    1.19    0.72
  -3   7  -7    2.76    0.90
   3   7   7    2.16    0.45
   5  -7   7    0.03    0.58
  -5  -7  -7   -0.79    0.53
  -5   7  -7    0.01    0.73
   5   7   7   -0.04    0.33
   5   7   7   -0.27    0.54
  -7  -7  -7    3.19    0.93
   7  -7   7    3.21    0.92
   7   7   7    3.05    1.00
   7   7   7    3.52    0.61
  -7   7  -7    2.70    0.93
  -9  -7  -7   -0.51    0.72
   9  -7   7    0.49    0.82
  -9   7  -7    0.04    0.70
   9   7   7    0.12    0.44
   9   7   7   -0.62    0.59
  10  -8  -7    0.80    0.87
 -10  -8   7    0.23    0.61
  10  -8  -7    0.31    0.60
  10   8  -7   -0.13    0.69
  10   8  -7    0.47    0.60
  -8  -8   7    1.04    0.57
   8  -8  -7    0.82    0.82
   8  -8  -7    1.31    0.63
  -8  -8   7    0.76    0.77
   8   8  -7    0.02    0.60
  -8   8   7    2.30    0.82
   6  -8  -7    1.65    0.59
  -6  -8   7    1.89    0.82
   6  -8  -7    1.27    0.85
  -6  -8   7    0.81    0.52
  -6   8   7    1.54    0.74
   6   8  -7    2.02    0.74
   4  -8  -7    4.32    1.09
   4  -8  -7    6.22    0.81
  -4  -8   7    4.52    1.03
  -4   8   7    5.26    1.06
   4   8  -7    5.37    0.99
   2  -8  -7    9.93    1.40
   2  -8  -7   11.34    0.85
  -2  -8   7   12.85    1.54
   2   8  -7   10.84    1.27
  -2   8   7    9.11    1.30
   0  -8  -7   -0.04    0.31
   0  -8   7    0.00    0.55
   0  -8  -7    0.10    0.31
   0  -8  -7   -0.44    0.63
   0   8   7    0.11    0.62
   0   8  -7   -0.20    0.60
  -2  -8  -7    3.11    0.56
  -2  -8  -7    3.19    0.90
   2  -8   7    2.28    0.78
   2   8   7    1.86    0.87
  -2   8  -7    2.67    0.85
   4  -8   7   -0.14    0.60
  -4  -8  -7    0.47    0.67
   4   8   7    1.42    0.78
  -4   8  -7    1.24    0.89
   6  -8   7    0.34    0.67
  -6  -8  -7    0.41    0.70
   6   8   7   -0.23    0.30
  -6   8  -7   -0.20    0.61
   6   8   7    0.36    0.70
   8  -8   7    1.27    0.88
  -8  -8  -7    0.14    0.69
   8   8   7    1.21    0.76
   8   8   7    0.62    0.41
  -8   8  -7    0.80    0.75
  -9  -9   7   -0.19    0.51
   9  -9  -7    1.04    0.99
   9  -9  -7    0.68    0.60
  -9   9   7    0.82    0.71
   9   9  -7    0.57    0.63
  -7  -9   7    0.83    0.70
   7  -9  -7    0.65    0.50
  -7  -9   7    0.20    0.48
   7  -9  -7    1.03    0.83
   7   9  -7    0.22    0.60
  -7   9   7    0.26    0.65
   5  -9  -7    0.46    0.43
   5  -9  -7    0.11    0.79
  -5  -9   7   -0.51    0.58
  -5   9   7    0.68    0.70
   5   9  -7    0.73    0.63
   3  -9  -7    5.57    0.68
  -3  -9   7    5.02    1.18
   3  -9  -7    5.27    1.10
  -3   9   7    6.04    1.17
   3   9  -7    6.88    1.06
   1  -9  -7    3.71    0.61
   1  -9  -7    3.85    0.53
   1  -9  -7    4.28    1.04
  -1  -9   7    3.74    0.96
  -1   9   7    4.68    1.12
   1   9  -7    4.69    0.98
   1  -9   7    3.44    0.94
  -1  -9  -7    3.32    0.97
  -1   9  -7    2.79    0.88
   1   9   7    3.94    1.07
   3  -9   7   -0.39    0.64
  -3  -9  -7    0.56    0.73
   3   9   7   -0.32    0.50
  -3   9  -7    0.88    0.68
  -5  -9  -7    0.30    0.68
   5  -9   7    0.60    0.64
  -5   9  -7    1.36    0.77
   5   9   7   -0.14    0.62
   7  -9   7   -0.53    0.66
  -7  -9  -7   -0.05    0.66
  -7   9  -7    0.35    0.69
   7   9   7   -0.84    0.51
  -9  -9  -7    1.29    0.87
   9  -9   7    0.50    0.81
   9   9   7    0.21    0.70
  -9   9  -7    0.84    0.73
  -8 -10   7    0.93    0.74
   8 -10  -7    0.03    0.50
   8 -10  -7   -0.15    0.84
  -8 -10   7   -0.57    0.46
   8  10  -7   -0.47    0.56
  -8  10   7   -0.11    0.65
  -6 -10   7    2.92    0.95
   6 -10  -7    2.33    0.99
  -6  10   7    2.62    0.84
   6  10  -7    2.72    0.78
  -4 -10   7    1.24    0.71
   4 -10  -7    0.52    0.39
  -4  10   7    0.45    0.67
   4  10  -7    1.26    0.68
   2 -10  -7   16.70    0.87
  -2 -10   7   17.94    1.95
   2 -10  -7   16.73    1.78
  -2  10   7   16.23    1.80
   2  10  -7   17.33    1.80
   0 -10  -7    5.45    1.17
   0  10  -7    4.18    1.64
   0  10   7    4.60    1.41
   2 -10   7   -0.28    0.58
  -2 -10  -7   -0.23    0.72
   2  10   7    0.90    0.76
  -2  10  -7    0.20    0.67
   4 -10   7    0.11    0.59
  -4  10  -7   -0.15    0.68
   4  10   7    0.24    0.67
  -6 -10  -7   -0.36    0.62
   6 -10   7   -0.01    0.71
   6  10   7   -1.12    0.49
  -6  10  -7    0.64    0.74
   8 -10   7   -1.45    0.61
  -8 -10  -7   -0.32    0.73
  -8  10  -7    0.29    0.72
   8  10   7    0.29    0.68
  -7 -11   7    1.20    0.49
   7 -11  -7    1.31    0.54
  -7 -11   7    0.25    0.66
   7 -11  -7    1.10    0.91
  -7  11   7    3.24    0.95
   5 -11  -7    0.92    0.81
  -5 -11   7   -0.14    0.69
   5 -11  -7   -0.38    0.33
  -5  11   7    0.02    0.68
   3 -11  -7    6.97    1.25
  -3 -11   7    7.28    1.28
   3 -11  -7    6.90    0.63
  -3  11   7    6.92    1.37
   3  11  -7    5.03    1.04
   1 -11  -7    0.52    1.23
  -1 -11   7    0.42    0.67
  -1  11   7    0.10    0.69
   1  11  -7    0.90    0.72
   1 -11   7    0.28    0.69
  -1 -11  -7    0.64    1.02
   1  11   7    0.30    0.67
  -1  11  -7   -0.21    0.66
  -3 -11  -7    0.75    0.78
   3 -11   7   -0.20    0.56
  -3  11  -7    0.03    0.69
   3  11   7    0.71    0.72
  -5 -11  -7    0.00    0.71
   5 -11   7   -0.03    0.70
  -5  11  -7   -0.33    0.64
   5  11   7    0.22    0.67
  -7 -11  -7   -0.74    0.67
   7 -11   7   -0.55    0.74
   7  11   7    0.02    0.63
  -7  11  -7    1.17    0.81
   6 -12  -7    3.20    1.07
  -6 -12   7    0.83    0.76
   6 -12  -7    2.85    0.60
  -6  12   7    1.31    0.93
   6  12  -7    0.48    0.68
  -4 -12   7    1.01    0.82
   4 -12  -7    0.01    0.32
   4 -12  -7   -0.13    0.66
   4  12  -7   -1.02    0.60
  -4  12   7    0.02    0.76
   2 -12  -7    0.43    0.78
  -2 -12   7   -0.71    0.54
  -2  12   7    0.25    0.68
   2  12  -7   -0.56    0.63
   0 -12  -7    0.13    0.74
   0 -12   7    0.44    0.67
   0  12  -7    1.28    0.77
   0  12   7    0.94    0.75
  -2 -12  -7    0.68    0.80
   2 -12   7   -0.28    0.66
   2  12   7    0.13    0.69
  -2  12  -7    0.03    0.69
  -4 -12  -7    2.23    0.90
   4 -12   7    3.56    1.02
  -4  12  -7    3.58    1.02
   4  12   7    1.04    0.76
   6 -12   7    0.49    0.76
  -6 -12  -7    0.55    0.82
   6  12   7   -0.01    0.65
  -6  12  -7    0.52    0.74
   5 -13  -7    0.76    0.87
  -5 -13   7    2.02    0.92
   5 -13  -7    1.74    0.48
   5  13  -7    1.25    0.79
  -5  13   7    0.08    0.69
   3 -13  -7    3.40    1.09
  -3 -13   7    2.48    0.94
  -3  13   7    3.49    1.05
   3  13  -7    3.82    0.98
   1 -13  -7    0.04    0.72
  -1 -13   7    0.29    0.71
   1  13  -7    1.06    0.78
  -1  13   7   -0.58    0.60
  -1 -13  -7    0.76    0.79
   1 -13   7    1.10    0.79
   1  13   7   -0.38    0.59
  -1  13  -7    1.00    0.79
   3 -13   7    0.05    0.66
  -3 -13  -7    0.23    0.82
  -3  13  -7    1.24    0.84
   3  13   7    1.37    0.92
  -5 -13  -7    0.52    0.80
   5 -13   7    1.08    0.89
   5  13   7    0.55    0.78
  -5  13  -7    0.34    0.77
   4 -14  -7   -0.16    0.86
  -4 -14   7    0.12    0.76
   4  14  -7   -0.55    0.65
  -4  14   7    0.10    0.69
  -2 -14   7    1.31    0.89
   2 -14  -7    0.71    0.83
  -2  14   7    0.09    0.70
   2  14  -7   -0.65    0.65
   0 -14  -7   -0.48    0.74
   0 -14   7    0.34    0.72
   0  14   7    0.41    0.76
   0  14  -7   -0.75    0.64
  -2 -14  -7    1.58    0.92
   2 -14   7    0.63    0.78
   2  14   7    2.15    0.91
  -2  14  -7    1.04    0.84
   4 -14   7    0.95    0.85
  -4 -14  -7    0.20    0.76
   4  14   7    1.37    0.88
  -4  14  -7    0.02    0.71
  -3 -15   7   -0.31    0.66
   3 -15  -7    0.49    0.89
  -3  15   7    0.91    0.87
   3  15  -7    1.98    0.89
  -1 -15   7   -0.53    0.65
   1 -15  -7   -0.35    0.74
   1  15  -7   -0.29    0.74
  -1  15   7    1.04    0.84
  -1 -15  -7   -1.34    0.73
   1 -15   7    0.17    0.79
  -1  15  -7    2.35    0.89
   1  15   7   -0.75    0.69
   8   0  -8   11.11    1.46
   8   0  -8   10.10    1.33
   8   0  -8   11.24    1.32
   6   0  -8    0.74    0.59
   6   0  -8    0.22    0.64
   6   0  -8   -0.11    0.57
  -4   0   8    3.65    0.87
   4   0  -8    5.21    0.94
   4   0  -8    5.22    1.04
   2   0  -8   -0.27    0.58
  -2   0   8    0.73    0.61
   2   0  -8    0.68    0.57
   0   0  -8    0.66    0.79
   0   0   8   -0.12    0.47
   2   0   8    8.36    1.14
  -2   0  -8    7.45    1.28
  -4   0  -8    0.82    0.69
   4   0   8   -0.32    0.40
  -4   0  -8   -0.38    0.49
  -6   0  -8   -0.31    0.52
   6   0   8    0.00    0.50
  -6   0  -8   -0.73    0.52
  -8   0  -8    3.07    0.97
  -8   0  -8    4.96    1.00
   8   0   8    2.86    0.85
   9  -1  -8    0.04    0.57
   9  -1  -8    0.13    0.51
   9   1  -8   -0.14    0.47
   9   1  -8    1.02    0.76
   7  -1  -8    0.08    0.62
   7  -1  -8    0.56    0.52
   7  -1  -8   -0.17    0.54
   7   1  -8    0.21    0.62
   7   1  -8    1.07    0.71
   7   1  -8    0.01    0.49
  -5  -1   8    3.11    0.84
   5  -1  -8    1.42    0.68
   5  -1  -8    2.83    0.82
   5  -1  -8    3.09    0.82
   5   1  -8    1.52    0.69
   5   1  -8    2.58    0.75
  -3  -1   8    1.27    0.64
   3  -1  -8    0.59    0.57
   3  -1  -8    2.73    0.83
  -3   1   8    1.62    0.64
   3   1  -8    1.66    0.74
   3   1  -8    1.78    0.64
   1  -1  -8    0.91    0.56
  -1  -1   8    0.47    0.50
   1  -1  -8    1.84    0.75
   1   1  -8    0.04    0.48
  -1   1   8    0.32    0.50
   1   1  -8    0.52    0.67
  -1  -1  -8    2.69    1.57
   1  -1   8    1.50    0.63
  -1  -1  -8    1.51    0.67
   1   1   8    2.25    0.70
  -1   1  -8    2.76    1.08
  -1   1  -8    1.21    0.59
   3  -1   8    0.21    0.51
  -3  -1  -8    0.10    0.53
  -3  -1  -8   -0.02    0.57
   3   1   8    0.60    0.49
  -3   1  -8   -0.26    0.53
  -3   1  -8    0.16    0.50
  -5  -1  -8   -0.56    0.51
   5  -1   8   -0.02    0.48
  -5  -1  -8    0.36    0.72
  -5   1  -8    0.11    0.54
   5   1   8    0.00    0.47
  -5   1  -8    0.76    0.77
   7  -1   8   -0.27    0.52
  -7  -1  -8   -0.16    0.59
  -7  -1  -8   -0.17    0.61
  -7   1  -8   -1.13    0.52
  -7   1  -8    0.05    0.66
   7   1   8    0.66    0.56
   8  -2  -8   14.50    1.44
   8  -2  -8    8.68    1.31
   8   2  -8   14.62    1.69
   8   2  -8   12.65    1.36
   6  -2  -8    0.65    0.62
   6  -2  -8    1.24    0.69
   6  -2  -8    0.54    0.60
   6   2  -8    0.82    0.63
   6   2  -8    0.72    0.61
   4  -2  -8    1.58    0.70
   4  -2  -8    2.26    0.76
  -4  -2   8    2.06    0.77
   4   2  -8    0.44    0.56
   4   2  -8    2.25    0.77
   2  -2  -8    0.63    0.65
   2  -2  -8    0.53    0.59
  -2  -2   8    1.17    0.58
   2   2  -8   -0.57    0.53
   2   2  -8    0.71    0.56
  -2   2   8    1.91    0.64
   0  -2   8    4.38    0.91
   0  -2  -8    4.81    0.90
   0   2   8    4.61    0.81
   0   2  -8    4.98    0.77
   2  -2   8    1.85    0.71
  -2  -2  -8    0.78    0.78
  -2  -2  -8    2.52    0.74
  -2   2  -8    2.01    0.86
   2   2   8    1.55    0.62
  -2   2  -8    2.15    0.60
   4  -2   8    0.26    0.55
  -4  -2  -8    0.11    0.56
  -4  -2  -8    0.70    0.72
   4   2   8    0.72    0.52
  -4   2  -8    0.96    0.74
  -4   2  -8    0.81    0.53
  -6  -2  -8   -0.17    0.62
  -6  -2  -8    0.57    0.63
   6  -2   8    2.46    0.78
  -6   2  -8    1.51    0.61
   6   2   8    1.64    0.63
  -6   2  -8    0.52    0.68
  -8  -2  -8    0.33    0.73
   8  -2   8    0.48    0.72
  -8  -2  -8    0.50    0.69
   8   2   8    0.76    0.62
  -8   2  -8    0.80    0.82
  -8   2  -8    0.03    0.60
   9  -3  -8    3.00    0.73
  -9  -3   8    0.63    0.75
   9  -3  -8    2.42    0.88
   9  -3  -8    3.24    0.94
   9   3  -8    2.43    0.72
   9   3  -8    3.64    1.06
   7  -3  -8    8.10    1.19
   7  -3  -8    8.08    1.16
   7  -3  -8    7.98    1.26
   7   3  -8    7.76    1.09
   7   3  -8   10.19    1.22
   5  -3  -8    5.36    1.03
   5  -3  -8    5.58    0.95
  -5  -3   8    6.18    1.11
   5  -3  -8    2.14    0.80
   5   3  -8    4.97    0.98
   5   3  -8    3.96    0.80
  -3  -3   8   -0.85    0.44
   3  -3  -8    0.07    0.57
   3  -3  -8    1.13    0.64
   3   3  -8   -0.27    0.42
   3   3  -8   -0.40    0.51
   1  -3  -8    0.97    0.74
   1  -3  -8    0.48    0.59
  -1  -3   8    0.32    0.55
   1   3  -8    0.56    1.02
   1   3  -8   -0.15    0.42
  -1   3   8   -0.06    0.43
  -1  -3  -8   -0.07    0.55
   1  -3   8   -0.11    0.49
   1   3   8    0.65    0.49
  -1   3  -8    0.00    0.40
  -1   3  -8   -0.24    0.58
   3  -3   8   -0.03    0.49
  -3  -3  -8    0.55    0.59
   3   3   8   -0.10    0.43
  -3   3  -8    0.95    0.67
  -3   3  -8   -0.26    0.39
   5  -3   8    5.87    1.05
  -5  -3  -8    6.88    1.27
  -5  -3  -8    8.89    1.22
  -5   3  -8    5.80    0.76
  -5   3  -8    7.27    1.28
   5   3   8    4.02    0.78
  -7  -3  -8    1.52    0.83
   7  -3   8    0.70    1.14
  -7  -3  -8    1.04    0.77
   7   3   8    0.99    0.55
  -7   3  -8    1.01    0.76
  -7   3  -8    1.80    0.62
   8  -4  -8    0.89    0.56
   8  -4  -8    0.05    0.74
   8  -4  -8    0.88    0.67
   8   4  -8    0.77    0.76
   8   4  -8    1.03    0.61
   6  -4  -8   12.21    1.44
   6  -4  -8   11.19    1.31
  -6  -4   8   12.56    1.54
   6  -4  -8   10.35    1.43
   6   4  -8   11.20    1.32
   6   4  -8   11.96    1.23
   4  -4  -8    7.18    1.13
   4  -4  -8    6.47    0.98
   4  -4  -8    6.87    1.15
  -4  -4   8    9.41    1.36
   4   4  -8    6.88    0.89
   4   4  -8    5.36    1.03
   2  -4  -8   -0.21    0.56
  -2  -4   8    0.27    0.53
   2   4  -8   -0.46    0.91
   2   4  -8    0.04    0.44
   0  -4   8    0.09    0.55
   0  -4  -8   -0.62    0.54
   0   4   8    0.41    0.82
   0   4   8    0.91    0.49
   0   4  -8    0.13    0.58
   0   4  -8   -0.62    0.33
   2  -4   8    0.00    0.53
  -2  -4  -8    0.10    0.58
   2   4   8    0.32    0.67
   2   4   8    0.72    0.49
  -2   4  -8    1.06    0.73
   4  -4   8    0.82    0.62
  -4  -4  -8    0.87    0.70
   4   4   8    0.63    0.72
  -4   4  -8    0.59    0.71
   4   4   8    0.58    0.48
   6  -4   8    4.09    1.19
  -6  -4  -8    5.89    1.07
  -6   4  -8    5.39    0.67
   6   4   8    5.27    0.83
  -6   4  -8    5.28    1.14
   8  -4   8    3.23    1.00
   8   4   8    3.98    0.82
   7  -5  -8    0.53    0.63
   7  -5  -8   -0.18    0.66
  -7  -5   8   -0.25    0.58
   7  -5  -8    1.37    0.68
   7   5  -8    0.09    0.54
   7   5  -8    0.27    0.60
  -5  -5   8   10.12    1.42
   5  -5  -8    9.96    1.34
   5  -5  -8   11.72    1.30
   5   5  -8    9.80    1.04
   5   5  -8   11.42    1.34
   3  -5  -8    0.60    0.50
   3  -5  -8   -0.04    0.60
  -3  -5   8    0.77    0.73
  -3   5   8   -0.13    0.63
   3   5  -8    0.14    0.42
   1  -5  -8    0.16    0.59
  -1  -5   8    0.07    0.54
  -1   5   8   -0.17    0.75
   1   5  -8    0.29    0.65
  -1  -5  -8    1.08    0.68
   1  -5   8   -0.19    0.52
   1   5   8    0.54    0.75
  -1   5  -8   -0.52    0.54
   1   5   8    0.27    0.39
   3  -5   8    2.20    0.81
  -3  -5  -8    1.92    0.76
  -3   5  -8    1.79    0.83
   3   5   8    2.18    0.57
   3   5   8    1.41    0.82
  -5  -5  -8   -0.52    0.64
   5  -5   8   -0.28    0.55
   5   5   8   -0.48    0.63
  -5   5  -8    0.15    0.64
  -7  -5  -8    7.05    1.22
   7  -5   8    6.30    1.15
   7   5   8    4.77    0.80
  -7   5  -8    7.50    1.32
   7   5   8    5.68    1.23
   8  -6  -8    0.80    0.87
   8  -6  -8    0.63    0.61
   8  -6  -8    0.27    0.62
   8   6  -8   -0.42    0.53
  -6  -6   8   33.56    2.20
   6  -6  -8   29.39    1.78
   6  -6  -8   33.24    2.23
   6   6  -8   37.63    2.58
   6   6  -8   31.41    1.70
  -4  -6   8    1.52    0.77
   4  -6  -8   -0.16    0.61
   4  -6  -8    0.94    0.53
   4   6  -8    1.59    0.88
  -4   6   8    0.04    0.63
   4   6  -8    0.79    0.46
   2  -6  -8    3.61    0.97
   2  -6  -8    4.32    0.90
  -2  -6   8    3.78    1.26
   2   6  -8    5.30    1.04
  -2   6   8    3.60    1.19
   0  -6   8    0.65    0.96
   0  -6  -8    0.17    0.67
   0   6   8    0.16    0.66
   0   6  -8    0.41    0.67
  -2  -6  -8    0.63    0.64
   2   6   8    0.44    0.69
  -2   6  -8   -0.17    0.66
   2   6   8    0.71    0.42
  -4  -6  -8    0.58    0.71
   4  -6   8    0.37    0.61
  -4   6  -8   -0.20    0.63
   4   6   8    0.60    0.42
   4   6   8    1.21    0.77
   6  -6   8    8.21    1.32
  -6  -6  -8   15.49    1.84
  -6   6  -8    9.34    1.43
   6   6   8   12.53    1.71
   6   6   8   11.58    0.99
   7  -7  -8    5.36    0.92
  -7  -7   8    3.23    0.99
   7  -7  -8    4.62    1.15
   7   7  -8    4.22    0.80
   7   7  -8    4.87    1.16
  -5  -7   8   -0.01    0.63
   5  -7  -8    0.66    0.53
   5  -7  -8    0.45    0.73
   5   7  -8    0.23    0.47
   5   7  -8   -0.24    0.54
  -5   7   8    0.36    0.86
   3  -7  -8    0.67    0.76
   3  -7  -8    1.62    0.62
  -3  -7   8    2.37    0.88
  -3   7   8    1.44    0.78
   3   7  -8    1.93    0.76
   1  -7  -8   12.55    1.48
   1  -7  -8   11.27    0.97
  -1  -7   8   12.08    1.55
  -1   7   8    9.43    1.44
   1   7  -8   13.78    1.57
  -1  -7  -8   -1.13    0.61
   1  -7   8    0.22    0.66
  -1   7  -8    0.74    0.65
   1   7   8    0.24    0.66
   3  -7   8    2.58    0.85
  -3  -7  -8    4.19    1.01
   3   7   8    2.81    0.55
   3   7   8    2.64    0.94
  -3   7  -8    4.88    1.05
   5  -7   8    7.43    1.25
   5   7   8    6.02    1.26
  -5   7  -8    4.93    1.11
   5   7   8    6.27    0.75
   6  -8  -8    2.70    1.02
   6  -8  -8    5.16    0.86
  -6  -8   8    5.49    1.16
   6   8  -8    2.67    0.63
   6   8  -8    2.99    0.88
   4  -8  -8   -0.67    0.61
  -4  -8   8   -0.03    0.60
   4  -8  -8    1.09    0.53
   4   8  -8    2.19    0.79
  -4   8   8    0.77    0.73
  -2  -8   8   -0.91    0.55
   2  -8  -8    0.48    0.44
   2   8  -8    0.94    0.70
  -2   8   8   -0.16    0.65
   0  -8  -8   22.62    2.13
   0  -8  -8   19.57    1.10
   0  -8   8   18.78    1.88
   0   8   8   15.92    1.82
   0   8  -8   20.16    1.71
   2  -8   8    2.19    0.82
   2   8   8    2.43    0.90
  -2   8  -8    2.39    0.88
   4  -8   8   -0.11    0.54
  -4  -8  -8    0.71    0.71
  -4   8  -8   -0.31    0.64
   4   8   8    1.48    0.84
   6  -8   8    1.59    0.79
  -6  -8  -8    1.20    0.82
  -6   8  -8    1.33    0.84
   6   8   8    0.54    0.76
  -5  -9   8    2.91    1.00
   5  -9  -8    3.60    0.72
   5  -9  -8    3.27    1.06
   5   9  -8    3.79    0.97
  -5   9   8    2.31    0.90
  -3  -9   8    3.25    1.03
   3  -9  -8    2.70    0.96
   3  -9  -8    4.64    0.68
   3   9  -8    2.40    0.89
  -3   9   8    3.83    1.08
   1  -9  -8   -0.22    0.32
   1  -9  -8   -0.66    0.63
  -1  -9   8   -0.22    0.60
  -1   9   8   -0.35    0.60
   1   9  -8    0.10    0.65
  -1  -9  -8    0.93    0.76
   1  -9   8   -0.49    0.62
   1   9   8   -0.82    0.57
  -1   9  -8    1.27    0.77
  -3  -9  -8    1.40    0.90
   3  -9   8    2.58    0.92
   3   9   8    0.80    0.75
  -3   9  -8    2.10    0.83
   5  -9   8   -0.30    0.64
  -5  -9  -8    1.70    0.91
   5   9   8    0.37    0.66
  -5   9  -8    0.84    0.75
  -4 -10   8    0.71    0.72
   4 -10  -8    1.65    0.52
   4 -10  -8    0.15    0.73
   4  10  -8    3.64    0.99
  -4  10   8   -0.03    0.72
   2 -10  -8    0.16    0.81
   2 -10  -8    1.21    0.43
  -2 -10   8    0.85    0.78
   2  10  -8    0.97    0.76
  -2  10   8    1.53    0.93
   0 -10   8    9.35    1.47
   0 -10  -8   12.36    1.67
   0  10  -8   10.97    1.51
   0  10   8    8.70    1.52
   2 -10   8    0.44    0.69
  -2 -10  -8   -0.89    0.64
   2  10   8   -0.96    0.46
  -2  10  -8    0.48    0.74
  -4 -10  -8   -1.59    0.52
   4 -10   8    0.19    0.72
  -4  10  -8   -0.05    0.71
   4  10   8   -0.04    0.72
   3 -11  -8   -0.17    0.80
  -3 -11   8   -0.22    0.71
  -3  11   8    0.64    0.71
   3  11  -8    1.86    0.84
   1 -11  -8    1.75    0.90
  -1 -11   8    0.77    0.77
   1  11  -8    1.82    0.85
  -1  11   8    1.92    0.94
   1 -11   8    2.85    1.01
  -1 -11  -8    0.43    0.77
   1  11   8    1.30    0.84
  -1  11  -8    3.46    1.05
  -4   0   9   -0.38    0.87
   4   0  -9    0.02    0.52
   4   0  -9    0.05    0.61
  -2   0   9   -0.06    0.52
   2   0  -9    1.40    0.78
   2   0  -9   -1.28    0.47
   0   0  -9   -0.17    0.52
   0   0  -9    0.58    0.66
   0   0   9    0.13    0.51
  -2   0  -9   -0.02    0.57
   2   0   9    0.30    0.55
  -2   0  -9   -0.01    0.72
   5  -1  -9    1.33    0.75
   5  -1  -9    0.34    0.64
   5   1  -9    0.00    0.58
  -3  -1   9    0.83    0.65
   3  -1  -9    0.80    0.72
   3  -1  -9    0.97    0.66
   3   1  -9    2.45    0.83
   3   1  -9    1.21    0.68
  -3   1   9    1.14    0.62
  -1  -1   9    0.77    0.61
   1  -1  -9    0.62    0.62
   1  -1  -9    1.12    0.75
   1   1  -9    1.61    0.78
   1   1  -9    0.74    0.59
  -1   1   9    0.68    0.55
   1  -1   9    4.24    0.93
  -1  -1  -9    5.06    1.12
  -1  -1  -9    2.83    0.82
  -1   1  -9    5.50    0.88
  -1   1  -9    5.48    1.17
   1   1   9    4.64    0.91
  -3  -1  -9    0.55    0.70
  -3  -1  -9    1.36    0.67
   3  -1   9   -0.12    0.49
   3   1   9    0.40    0.56
  -3   1  -9    0.44    0.58
  -3   1  -9    1.39    0.80
   4  -2  -9    0.45    0.61
   4  -2  -9    0.25    0.62
   4  -2  -9    0.00    0.59
  -4  -2   9    0.98    0.62
   4   2  -9    0.26    0.55
   4   2  -9   -0.87    0.49
   2  -2  -9    0.15    0.61
  -2  -2   9   -0.22    0.52
   2  -2  -9    0.20    0.61
  -2   2   9    0.12    0.49
   2   2  -9   -0.16    0.53
   2   2  -9    0.55    0.67
   0  -2  -9    4.71    0.99
   0  -2  -9    6.49    1.27
   0   2   9    3.25    0.79
   0   2  -9    4.61    1.09
   0   2  -9    3.94    0.76
  -2  -2  -9    0.48    0.62
  -2  -2  -9    0.75    0.79
  -2   2  -9    0.28    0.52
   2   2   9   -0.36    0.44
  -2   2  -9    0.47    0.71
   3  -3  -9    0.16    0.64
   3  -3  -9    1.18    0.74
  -3  -3   9    0.34    0.58
   3   3  -9    0.13    0.65
   3   3  -9    0.69    0.91
  -1  -3   9    0.21    0.57
   1  -3  -9    0.04    0.63
   1  -3  -9    0.93    0.74
   1   3  -9    0.55    0.52
   1   3  -9    0.13    0.59
  -1   3   9   -0.04    0.43
   1  -3   9    2.23    0.80
  -1  -3  -9    1.83    0.78
  -1  -3  -9    3.42    1.07
  -1   3  -9    1.51    0.56
  -1   3  -9    3.36    0.99
   1   3   9    1.82    0.64
  -3  -3  -9    0.57    0.62
  -3  -3  -9   -0.89    0.54
   3  -3   9   -0.02    0.56
   3   3   9   -0.26    0.43
  -3   3  -9    0.59    0.76
   2  -4  -9   -1.13    0.53
  -2  -4   9    0.30    0.60
   2  -4  -9   -0.03    0.58
   2   4  -9    0.18    0.70
   2   4  -9    0.33    0.50
   0  -4  -9    1.49    0.78
   0  -4   9    0.39    0.59
   0  -4  -9    0.22    0.64
   0   4   9    0.81    0.51
   0   4  -9    0.98    0.69
  -2  -4  -9   -0.43    0.60
  -2  -4  -9    0.42    0.73
   2  -4   9   -0.64    0.50
   2   4   9    1.28    0.58
  -2   4  -9   -0.30    0.64
   1  -5  -9   -0.41    0.65
  -1  -5   9   -0.22    0.58
   1   5  -9    0.32    0.67
  -1  -5  -9    0.24    0.65
   1  -5   9    0.13    0.61
  -1   5  -9    0.11    0.67
   1   5   9    0.07    0.42
   0   0   0    0.00    0.00
;
_shelx_hkl_checksum   27276

_shelx_fab_file
;
    2    0    0     94.24      0.00
    4    0    0     57.23      0.00
    6    0    0     32.68      0.00
    8    0    0     20.79      0.00
   10    0    0     13.15      0.00
   12    0    0      7.59      0.00
   14    0    0      4.68      0.00
   16    0    0      3.27      0.00
    3    1    0    -67.10      0.00
    5    1    0    -37.84      0.00
    7    1    0    -22.91      0.00
    9    1    0    -14.89      0.00
   11    1    0     -8.98      0.00
   13    1    0     -5.16      0.00
   15    1    0     -3.58      0.00
   17    1    0     -2.07      0.00
    0    2    0     72.92      0.00
    2    2    0     58.99      0.00
    4    2    0     34.32      0.00
    6    2    0     19.41      0.00
    8    2    0     12.69      0.00
   10    2    0      8.09      0.00
   12    2    0      4.60      0.00
   14    2    0      2.84      0.00
   16    2    0      2.09      0.00
    1    3    0    -36.18      0.00
    3    3    0    -22.16      0.00
    5    3    0    -10.91      0.00
    7    3    0     -6.86      0.00
    9    3    0     -4.75      0.00
   11    3    0     -2.82      0.00
   13    3    0     -1.40      0.00
   15    3    0     -1.07      0.00
   17    3    0     -0.68      0.00
    0    4    0     12.31      0.00
    2    4    0      7.69      0.00
    4    4    0      1.23      0.00
    6    4    0     -0.25      0.00
    8    4    0      0.24      0.00
   10    4    0      0.32      0.00
   12    4    0     -0.12      0.00
   14    4    0     -0.39      0.00
   16    4    0      0.00      0.00
    1    5    0      1.05      0.00
    3    5    0      4.29      0.00
    5    5    0      5.04      0.00
    7    5    0      3.43      0.00
    9    5    0      1.89      0.00
   11    5    0      1.13      0.00
   13    5    0      1.27      0.00
   15    5    0      0.95      0.00
    0    6    0     -1.49      0.00
    2    6    0     -3.06      0.00
    4    6    0     -4.82      0.00
    6    6    0     -4.35      0.00
    8    6    0     -2.85      0.00
   10    6    0     -1.39      0.00
   12    6    0     -1.09      0.00
   14    6    0     -1.29      0.00
   16    6    0     -0.60      0.00
    1    7    0     -2.35      0.00
    3    7    0      0.17      0.00
    5    7    0      1.98      0.00
    7    7    0      2.04      0.00
    9    7    0      0.95      0.00
   11    7    0      0.21      0.00
   13    7    0      0.62      0.00
   15    7    0      0.65      0.00
    0    8    0      6.87      0.00
    2    8    0      5.18      0.00
    4    8    0      2.10      0.00
    6    8    0      0.17      0.00
    8    8    0      0.00      0.00
   10    8    0      0.72      0.00
   12    8    0      0.56      0.00
   14    8    0     -0.11      0.00
   16    8    0     -0.06      0.00
    1    9    0     -7.52      0.00
    3    9    0     -5.04      0.00
    5    9    0     -2.37      0.00
    7    9    0     -1.06      0.00
    9    9    0     -1.26      0.00
   11    9    0     -1.52      0.00
   13    9    0     -0.78      0.00
   15    9    0     -0.13      0.00
    0   10    0      6.07      0.00
    2   10    0      5.05      0.00
    4   10    0      3.05      0.00
    6   10    0      1.53      0.00
    8   10    0      1.26      0.00
   10   10    0      1.81      0.00
   12   10    0      1.56      0.00
   14   10    0      0.54      0.00
    1   11    0     -2.84      0.00
    3   11    0     -1.94      0.00
    5   11    0     -1.03      0.00
    7   11    0     -0.72      0.00
    9   11    0     -1.36      0.00
   11   11    0     -1.84      0.00
   13   11    0     -1.03      0.00
   15   11    0     -0.04      0.00
    0   12    0      0.58      0.00
    2   12    0      0.36      0.00
    4   12    0      0.07      0.00
    6   12    0     -0.01      0.00
    8   12    0      0.50      0.00
   10   12    0      1.47      0.00
   12   12    0      1.37      0.00
   14   12    0      0.26      0.00
    1   13    0      0.22      0.00
    3   13    0      0.35      0.00
    5   13    0      0.34      0.00
    7   13    0      0.15      0.00
    9   13    0     -0.68      0.00
   11   13    0     -1.29      0.00
   13   13    0     -0.56      0.00
    0   14    0      0.33      0.00
    2   14    0      0.16      0.00
    4   14    0     -0.02      0.00
    6   14    0     -0.20      0.00
    8   14    0     -0.03      0.00
   10   14    0      0.73      0.00
   12   14    0      0.71      0.00
    1   15    0     -0.85      0.00
    3   15    0     -0.47      0.00
    5   15    0     -0.05      0.00
    7   15    0      0.38      0.00
    9   15    0      0.06      0.00
   11   15    0     -0.51      0.00
   13   15    0     -0.15      0.00
    0   16    0      0.70      0.00
    2   16    0      0.45      0.00
    4   16    0      0.03      0.00
    6   16    0     -0.52      0.00
    8   16    0     -0.75      0.00
   10   16    0     -0.09      0.00
   12   16    0      0.28      0.00
    1   17    0      0.23      0.00
    3   17    0      0.40      0.00
    5   17    0      0.66      0.00
    7   17    0      1.08      0.00
    9   17    0      0.77      0.00
   11   17    0     -0.06      0.00
    0   18    0     -0.89      0.00
    2   18    0     -0.84      0.00
    4   18    0     -0.69      0.00
    6   18    0     -0.87      0.00
    8   18    0     -1.01      0.00
   10   18    0     -0.36      0.00
    1   19    0      0.78      0.00
    3   19    0      0.44      0.00
    5   19    0      0.26      0.00
    7   19    0      0.56      0.00
    9   19    0      0.50      0.00
    0   20    0     -0.25      0.00
    2   20    0     -0.02      0.00
    4   20    0      0.35      0.00
    6   20    0      0.19      0.00
    8   20    0     -0.17      0.00
    1   21    0     -0.24      0.00
    3   21    0     -0.52      0.00
    5   21    0     -0.56      0.00
    0   22    0      0.13      0.00
    2   22    0      0.24      0.00
    4   22    0      0.33      0.00
  -17    1    1      0.26      0.00
  -15    1    1      0.52      0.00
  -13    1    1      1.13      0.00
  -11    1    1      1.90      0.00
   -9    1    1      3.01      0.00
   -7    1    1      4.63      0.00
   -5    1    1      6.94      0.00
   -3    1    1     10.51      0.00
   -1    1    1     13.48      0.00
    1    1    1     12.47      0.00
    3    1    1      8.22      0.00
    5    1    1      4.42      0.00
    7    1    1      2.57      0.00
    9    1    1      1.64      0.00
   11    1    1      0.69      0.00
   13    1    1      0.19      0.00
   15    1    1      0.50      0.00
   17    1    1      0.59      0.00
  -16    2    1     -0.48      0.00
  -14    2    1     -1.25      0.00
  -12    2    1     -2.43      0.00
  -10    2    1     -3.84      0.00
   -8    2    1     -5.97      0.00
   -6    2    1     -8.81      0.00
   -4    2    1    -13.26      0.00
   -2    2    1    -19.02      0.00
    0    2    1    -20.81      0.00
    2    2    1    -15.95      0.00
    4    2    1     -9.30      0.00
    6    2    1     -5.31      0.00
    8    2    1     -3.48      0.00
   10    2    1     -1.89      0.00
   12    2    1     -0.50      0.00
   14    2    1     -0.58      0.00
   16    2    1     -1.17      0.00
  -17    3    1      0.20      0.00
  -15    3    1      0.65      0.00
  -13    3    1      1.87      0.00
  -11    3    1      3.18      0.00
   -9    3    1      4.85      0.00
   -7    3    1      7.15      0.00
   -5    3    1     10.19      0.00
   -3    3    1     15.37      0.00
   -1    3    1     19.69      0.00
    1    3    1     17.57      0.00
    3    3    1     11.28      0.00
    5    3    1      6.76      0.00
    7    3    1      4.69      0.00
    9    3    1      2.96      0.00
   11    3    1      1.00      0.00
   13    3    1      0.35      0.00
   15    3    1      1.23      0.00
   17    3    1      1.25      0.00
  -16    4    1      0.09      0.00
  -14    4    1     -0.71      0.00
  -12    4    1     -1.94      0.00
  -10    4    1     -2.89      0.00
   -8    4    1     -4.13      0.00
   -6    4    1     -5.47      0.00
   -4    4    1     -7.94      0.00
   -2    4    1    -11.79      0.00
    0    4    1    -12.28      0.00
    2    4    1     -8.27      0.00
    4    4    1     -5.10      0.00
    6    4    1     -4.32      0.00
    8    4    1     -3.36      0.00
   10    4    1     -1.42      0.00
   12    4    1     -0.03      0.00
   14    4    1     -0.58      0.00
   16    4    1     -1.35      0.00
  -15    5    1     -0.40      0.00
  -13    5    1      0.58      0.00
  -11    5    1      1.29      0.00
   -9    5    1      1.51      0.00
   -7    5    1      1.61      0.00
   -5    5    1      1.79      0.00
   -3    5    1      3.46      0.00
   -1    5    1      4.60      0.00
    1    5    1      2.38      0.00
    3    5    1      0.43      0.00
    5    5    1      1.52      0.00
    7    5    1      2.51      0.00
    9    5    1      1.49      0.00
   11    5    1     -0.16      0.00
   13    5    1     -0.42      0.00
   15    5    1      0.60      0.00
  -16    6    1      0.86      0.00
  -14    6    1      0.58      0.00
  -12    6    1     -0.21      0.00
  -10    6    1     -0.13      0.00
   -8    6    1      0.57      0.00
   -6    6    1      1.52      0.00
   -4    6    1      1.67      0.00
   -2    6    1      0.99      0.00
    0    6    1      2.34      0.00
    2    6    1      4.38      0.00
    4    6    1      2.99      0.00
    6    6    1      0.07      0.00
    8    6    1     -0.77      0.00
   10    6    1      0.17      0.00
   12    6    1      1.05      0.00
   14    6    1      0.60      0.00
   16    6    1     -0.19      0.00
  -15    7    1     -1.10      0.00
  -13    7    1     -0.56      0.00
  -11    7    1     -0.27      0.00
   -9    7    1     -1.07      0.00
   -7    7    1     -2.42      0.00
   -5    7    1     -3.49      0.00
   -3    7    1     -3.44      0.00
   -1    7    1     -4.10      0.00
    1    7    1     -6.45      0.00
    3    7    1     -6.64      0.00
    5    7    1     -3.66      0.00
    7    7    1     -1.11      0.00
    9    7    1     -0.48      0.00
   11    7    1     -0.99      0.00
   13    7    1     -1.34      0.00
   15    7    1     -0.72      0.00
  -16    8    1      0.88      0.00
  -14    8    1      0.96      0.00
  -12    8    1      0.39      0.00
  -10    8    1      0.61      0.00
   -8    8    1      1.70      0.00
   -6    8    1      2.99      0.00
   -4    8    1      3.53      0.00
   -2    8    1      3.77      0.00
    0    8    1      5.61      0.00
    2    8    1      7.37      0.00
    4    8    1      6.16      0.00
    6    8    1      3.45      0.00
    8    8    1      1.47      0.00
   10    8    1      0.76      0.00
   12    8    1      1.17      0.00
   14    8    1      1.31      0.00
   16    8    1      0.58      0.00
  -15    9    1     -0.89      0.00
  -13    9    1     -0.47      0.00
  -11    9    1     -0.07      0.00
   -9    9    1     -0.43      0.00
   -7    9    1     -1.31      0.00
   -5    9    1     -2.11      0.00
   -3    9    1     -2.43      0.00
   -1    9    1     -3.48      0.00
    1    9    1     -5.48      0.00
    3    9    1     -6.06      0.00
    5    9    1     -4.63      0.00
    7    9    1     -2.58      0.00
    9    9    1     -0.87      0.00
   11    9    1     -0.53      0.00
   13    9    1     -1.13      0.00
   15    9    1     -0.97      0.00
  -14   10    1      0.45      0.00
  -12   10    1     -0.19      0.00
  -10   10    1     -0.48      0.00
   -8   10    1     -0.32      0.00
   -6   10    1      0.18      0.00
   -4   10    1      0.66      0.00
   -2   10    1      1.34      0.00
    0   10    1      2.80      0.00
    2   10    1      3.99      0.00
    4   10    1      3.82      0.00
    6   10    1      2.71      0.00
    8   10    1      1.09      0.00
   10   10    1      0.00      0.00
   12   10    1      0.40      0.00
   14   10    1      0.95      0.00
  -15   11    1     -0.38      0.00
  -13   11    1      0.22      0.00
  -11   11    1      0.82      0.00
   -9   11    1      1.16      0.00
   -7   11    1      1.14      0.00
   -5   11    1      0.78      0.00
   -3   11    1      0.25      0.00
   -1   11    1     -0.75      0.00
    1   11    1     -1.81      0.00
    3   11    1     -2.08      0.00
    5   11    1     -1.71      0.00
    7   11    1     -0.85      0.00
    9   11    1      0.27      0.00
   11   11    1      0.40      0.00
   13   11    1     -0.43      0.00
  -14   12    1     -0.08      0.00
  -12   12    1     -0.70      0.00
  -10   12    1     -1.24      0.00
   -8   12    1     -1.54      0.00
   -6   12    1     -1.33      0.00
   -4   12    1     -0.90      0.00
   -2   12    1     -0.22      0.00
    0   12    1      0.67      0.00
    2   12    1      0.99      0.00
    4   12    1      0.66      0.00
    6   12    1      0.22      0.00
    8   12    1     -0.45      0.00
   10   12    1     -0.89      0.00
   12   12    1     -0.35      0.00
   14   12    1      0.39      0.00
  -13   13    1      0.30      0.00
  -11   13    1      0.81      0.00
   -9   13    1      1.36      0.00
   -7   13    1      1.32      0.00
   -5   13    1      0.79      0.00
   -3   13    1      0.29      0.00
   -1   13    1     -0.42      0.00
    1   13    1     -0.92      0.00
    3   13    1     -0.51      0.00
    5   13    1      0.17      0.00
    7   13    1      0.58      0.00
    9   13    1      0.93      0.00
   11   13    1      0.90      0.00
   13   13    1      0.23      0.00
  -12   14    1     -0.09      0.00
  -10   14    1     -0.77      0.00
   -8   14    1     -1.24      0.00
   -6   14    1     -0.75      0.00
   -4   14    1     -0.11      0.00
   -2   14    1      0.38      0.00
    0   14    1      1.04      0.00
    2   14    1      1.00      0.00
    4   14    1      0.05      0.00
    6   14    1     -0.60      0.00
    8   14    1     -0.69      0.00
   10   14    1     -0.85      0.00
   12   14    1     -0.76      0.00
  -11   15    1     -0.09      0.00
   -9   15    1      0.92      0.00
   -7   15    1      1.06      0.00
   -5   15    1      0.32      0.00
   -3   15    1     -0.14      0.00
   -1   15    1     -0.66      0.00
    1   15    1     -1.16      0.00
    3   15    1     -0.57      0.00
    5   15    1      0.39      0.00
    7   15    1      0.45      0.00
    9   15    1      0.33      0.00
   11   15    1      0.69      0.00
  -12   16    1      0.67      0.00
  -10   16    1     -0.20      0.00
   -8   16    1     -1.15      0.00
   -6   16    1     -0.82      0.00
   -4   16    1     -0.23      0.00
   -2   16    1      0.01      0.00
    0   16    1      0.63      0.00
    2   16    1      0.85      0.00
    4   16    1      0.06      0.00
    6   16    1     -0.24      0.00
    8   16    1      0.22      0.00
   10   16    1     -0.03      0.00
   12   16    1     -0.62      0.00
  -11   17    1     -0.39      0.00
   -9   17    1      0.65      0.00
   -7   17    1      0.99      0.00
   -5   17    1      0.44      0.00
   -3   17    1      0.26      0.00
   -1   17    1      0.00      0.00
    1   17    1     -0.71      0.00
    3   17    1     -0.62      0.00
    5   17    1     -0.15      0.00
    7   17    1     -0.56      0.00
    9   17    1     -0.75      0.00
   11   17    1      0.07      0.00
  -10   18    1     -0.08      0.00
   -8   18    1     -0.64      0.00
   -6   18    1     -0.34      0.00
   -4   18    1      0.00      0.00
   -2   18    1     -0.06      0.00
    0   18    1      0.43      0.00
    2   18    1      0.96      0.00
    4   18    1      0.69      0.00
    6   18    1      0.74      0.00
    8   18    1      1.19      0.00
   10   18    1      0.67      0.00
   -9   19    1      0.18      0.00
   -7   19    1      0.11      0.00
   -5   19    1     -0.33      0.00
   -3   19    1     -0.32      0.00
   -1   19    1     -0.33      0.00
    1   19    1     -0.88      0.00
    3   19    1     -0.97      0.00
    5   19    1     -0.74      0.00
    7   19    1     -1.09      0.00
    9   19    1     -1.07      0.00
   -8   20    1      0.05      0.00
   -6   20    1      0.37      0.00
   -4   20    1      0.57      0.00
   -2   20    1      0.38      0.00
    0   20    1      0.51      0.00
    2   20    1      0.72      0.00
    4   20    1      0.49      0.00
    6   20    1      0.57      0.00
   -5   21    1     -0.44      0.00
   -3   21    1     -0.39      0.00
   -1   21    1     -0.19      0.00
    1   21    1     -0.22      0.00
    3   21    1     -0.09      0.00
    5   21    1      0.00      0.00
   -2   22    1      0.12      0.00
    0   22    1     -0.06      0.00
    2   22    1     -0.15      0.00
  -16    0    2     -1.59      0.00
  -14    0    2     -2.49      0.00
  -12    0    2     -3.15      0.00
  -10    0    2     -2.12      0.00
   -8    0    2     -1.81      0.00
   -6    0    2     -5.11      0.00
   -4    0    2    -11.25      0.00
   -2    0    2    -12.55      0.00
    0    0    2     -4.21      0.00
    4    0    2      3.28      0.00
    6    0    2      0.58      0.00
    8    0    2     -0.54      0.00
   10    0    2     -0.26      0.00
   12    0    2      0.76      0.00
   14    0    2      0.52      0.00
   16    0    2     -0.09      0.00
  -17    1    2      1.12      0.00
  -13    1    2      2.50      0.00
  -11    1    2      2.21      0.00
   -9    1    2      0.94      0.00
   -7    1    2      1.78      0.00
   -5    1    2      6.40      0.00
   -3    1    2     11.03      0.00
   -1    1    2      7.43      0.00
    1    1    2     -1.70      0.00
    3    1    2     -4.78      0.00
    5    1    2     -2.08      0.00
    7    1    2     -0.07      0.00
    9    1    2      0.32      0.00
   11    1    2     -0.46      0.00
   13    1    2     -0.82      0.00
   15    1    2     -0.07      0.00
  -16    2    2     -0.29      0.00
  -14    2    2     -0.85      0.00
  -12    2    2     -1.33      0.00
  -10    2    2     -0.08      0.00
   -8    2    2      1.17      0.00
   -6    2    2     -0.23      0.00
   -4    2    2     -4.54      0.00
   -2    2    2     -5.78      0.00
    0    2    2      0.45      0.00
    2    2    2      5.86      0.00
    4    2    2      4.33      0.00
    6    2    2      1.32      0.00
    8    2    2      0.26      0.00
   10    2    2      0.49      0.00
   12    2    2      1.01      0.00
   14    2    2      0.39      0.00
   16    2    2     -0.12      0.00
  -15    3    2     -0.54      0.00
  -13    3    2      0.09      0.00
  -11    3    2     -0.37      0.00
   -9    3    2     -2.31      0.00
   -7    3    2     -3.58      0.00
   -5    3    2     -1.94      0.00
   -3    3    2      1.21      0.00
   -1    3    2     -0.29      0.00
    1    3    2     -5.42      0.00
    3    3    2     -6.06      0.00
    5    3    2     -2.85      0.00
    7    3    2     -0.94      0.00
    9    3    2     -0.66      0.00
   11    3    2     -1.08      0.00
   13    3    2     -0.82      0.00
   15    3    2      0.03      0.00
  -16    4    2      0.84      0.00
  -14    4    2      0.68      0.00
  -12    4    2      0.42      0.00
  -10    4    2      1.80      0.00
   -8    4    2      4.05      0.00
   -6    4    2      4.88      0.00
   -4    4    2      2.66      0.00
   -2    4    2      0.75      0.00
    0    4    2      3.22      0.00
    2    4    2      5.58      0.00
    4    4    2      3.82      0.00
    6    4    2      1.44      0.00
    8    4    2      0.61      0.00
   10    4    2      0.72      0.00
   12    4    2      0.91      0.00
   14    4    2      0.27      0.00
   16    4    2      0.00      0.00
  -15    5    2     -0.57      0.00
  -13    5    2     -0.17      0.00
  -11    5    2     -0.58      0.00
   -9    5    2     -2.46      0.00
   -7    5    2     -4.26      0.00
   -5    5    2     -3.77      0.00
   -3    5    2     -1.09      0.00
   -1    5    2     -0.54      0.00
    1    5    2     -2.81      0.00
    3    5    2     -3.26      0.00
    5    5    2     -1.60      0.00
    7    5    2     -0.39      0.00
    9    5    2      0.04      0.00
   11    5    2     -0.20      0.00
   13    5    2     -0.24      0.00
   15    5    2      0.07      0.00
  -16    6    2      0.00      0.00
  -14    6    2     -0.18      0.00
  -12    6    2     -0.41      0.00
  -10    6    2      0.55      0.00
   -8    6    2      2.13      0.00
   -6    6    2      2.60      0.00
   -4    6    2      0.83      0.00
   -2    6    2     -1.16      0.00
    0    6    2     -0.34      0.00
    2    6    2      1.32      0.00
    4    6    2      1.13      0.00
    6    6    2      0.17      0.00
    8    6    2     -0.66      0.00
   10    6    2     -0.94      0.00
   12    6    2     -0.53      0.00
   14    6    2     -0.33      0.00
   16    6    2     -0.20      0.00
  -15    7    2      0.35      0.00
  -13    7    2      0.72      0.00
  -11    7    2      0.59      0.00
   -9    7    2     -0.35      0.00
   -7    7    2     -0.91      0.00
   -5    7    2     -0.10      0.00
   -3    7    2      1.67      0.00
   -1    7    2      2.06      0.00
    1    7    2      0.63      0.00
    3    7    2     -0.19      0.00
    5    7    2      0.15      0.00
    7    7    2      0.87      0.00
    9    7    2      1.63      0.00
   11    7    2      1.55      0.00
   13    7    2      0.92      0.00
   15    7    2      0.57      0.00
  -14    8    2     -0.39      0.00
  -12    8    2     -0.74      0.00
  -10    8    2     -0.44      0.00
   -8    8    2     -0.04      0.00
   -6    8    2     -0.41      0.00
   -4    8    2     -1.49      0.00
   -2    8    2     -2.20      0.00
    0    8    2     -1.49      0.00
    2    8    2     -0.51      0.00
    4    8    2     -0.47      0.00
    6    8    2     -0.87      0.00
    8    8    2     -1.54      0.00
   10    8    2     -1.92      0.00
   12    8    2     -1.36      0.00
   14    8    2     -0.76      0.00
  -15    9    2     -0.20      0.00
  -13    9    2      0.20      0.00
  -11    9    2      0.42      0.00
   -9    9    2      0.18      0.00
   -7    9    2      0.26      0.00
   -5    9    2      0.79      0.00
   -3    9    2      1.39      0.00
   -1    9    2      1.29      0.00
    1    9    2      0.54      0.00
    3    9    2      0.31      0.00
    5    9    2      0.62      0.00
    7    9    2      1.01      0.00
    9    9    2      1.44      0.00
   11    9    2      1.21      0.00
   13    9    2      0.54      0.00
   15    9    2      0.34      0.00
  -14   10    2      0.45      0.00
  -12   10    2     -0.02      0.00
  -10   10    2     -0.05      0.00
   -8   10    2      0.14      0.00
   -6   10    2      0.15      0.00
   -4   10    2     -0.07      0.00
   -2   10    2     -0.37      0.00
    0   10    2     -0.07      0.00
    2   10    2      0.39      0.00
    4   10    2      0.23      0.00
    6   10    2     -0.16      0.00
    8   10    2     -0.54      0.00
   10   10    2     -0.56      0.00
   12   10    2      0.03      0.00
   14   10    2      0.24      0.00
  -13   11    2     -0.36      0.00
  -11   11    2     -0.08      0.00
   -9   11    2     -0.23      0.00
   -7   11    2     -0.62      0.00
   -5   11    2     -1.07      0.00
   -3   11    2     -0.93      0.00
   -1   11    2     -0.64      0.00
    1   11    2     -1.09      0.00
    3   11    2     -1.39      0.00
    5   11    2     -1.02      0.00
    7   11    2     -0.48      0.00
    9   11    2     -0.17      0.00
   11   11    2     -0.52      0.00
   13   11    2     -0.87      0.00
  -14   12    2      0.40      0.00
  -12   12    2      0.15      0.00
  -10   12    2      0.08      0.00
   -8   12    2      0.31      0.00
   -6   12    2      1.14      0.00
   -4   12    2      1.79      0.00
   -2   12    2      1.41      0.00
    0   12    2      1.34      0.00
    2   12    2      1.97      0.00
    4   12    2      1.98      0.00
    6   12    2      1.35      0.00
    8   12    2      0.70      0.00
   10   12    2      0.62      0.00
   12   12    2      1.03      0.00
   14   12    2      0.80      0.00
  -13   13    2     -0.07      0.00
  -11   13    2      0.04      0.00
   -9   13    2      0.18      0.00
   -7   13    2     -0.21      0.00
   -5   13    2     -1.39      0.00
   -3   13    2     -1.72      0.00
   -1   13    2     -1.23      0.00
    1   13    2     -1.55      0.00
    3   13    2     -1.99      0.00
    5   13    2     -1.62      0.00
    7   13    2     -0.90      0.00
    9   13    2     -0.39      0.00
   11   13    2     -0.60      0.00
   13   13    2     -0.77      0.00
  -12   14    2     -0.12      0.00
  -10   14    2     -0.30      0.00
   -8   14    2     -0.57      0.00
   -6   14    2      0.18      0.00
   -4   14    2      1.22      0.00
   -2   14    2      1.00      0.00
    0   14    2      0.72      0.00
    2   14    2      1.14      0.00
    4   14    2      1.17      0.00
    6   14    2      0.72      0.00
    8   14    2      0.10      0.00
   10   14    2     -0.10      0.00
   12   14    2      0.27      0.00
  -11   15    2      0.23      0.00
   -9   15    2      0.55      0.00
   -7   15    2      0.56      0.00
   -5   15    2     -0.43      0.00
   -3   15    2     -0.87      0.00
   -1   15    2     -0.40      0.00
    1   15    2     -0.41      0.00
    3   15    2     -0.61      0.00
    5   15    2     -0.48      0.00
    7   15    2     -0.06      0.00
    9   15    2      0.52      0.00
   11   15    2      0.40      0.00
  -10   16    2     -0.22      0.00
   -8   16    2     -0.37      0.00
   -6   16    2      0.11      0.00
   -4   16    2      0.95      0.00
   -2   16    2      0.87      0.00
    0   16    2      0.59      0.00
    2   16    2      0.68      0.00
    4   16    2      0.67      0.00
    6   16    2      0.46      0.00
    8   16    2     -0.25      0.00
   10   16    2     -0.74      0.00
   -9   17    2     -0.06      0.00
   -7   17    2     -0.26      0.00
   -5   17    2     -1.02      0.00
   -3   17    2     -1.55      0.00
   -1   17    2     -1.44      0.00
    1   17    2     -1.35      0.00
    3   17    2     -1.27      0.00
    5   17    2     -1.12      0.00
    7   17    2     -0.54      0.00
    9   17    2      0.43      0.00
   -8   18    2      0.34      0.00
   -6   18    2      0.75      0.00
   -4   18    2      1.57      0.00
   -2   18    2      1.99      0.00
    0   18    2      1.96      0.00
    2   18    2      1.71      0.00
    4   18    2      1.45      0.00
    6   18    2      1.14      0.00
    8   18    2      0.25      0.00
   -7   19    2     -0.18      0.00
   -5   19    2     -0.69      0.00
   -3   19    2     -1.52      0.00
   -1   19    2     -1.83      0.00
    1   19    2     -1.55      0.00
    3   19    2     -1.09      0.00
    5   19    2     -0.93      0.00
    7   19    2     -0.58      0.00
   -6   20    2     -0.37      0.00
   -4   20    2      0.28      0.00
   -2   20    2      0.93      0.00
    0   20    2      0.85      0.00
    2   20    2      0.30      0.00
    4   20    2      0.07      0.00
    6   20    2      0.22      0.00
   -5   21    2      0.72      0.00
   -3   21    2      0.12      0.00
   -1   21    2     -0.06      0.00
    1   21    2      0.37      0.00
    3   21    2      0.70      0.00
    5   21    2      0.41      0.00
    0   22    2     -0.58      0.00
  -15    1    3     -1.13      0.00
  -13    1    3     -1.42      0.00
  -11    1    3     -1.33      0.00
   -9    1    3     -1.14      0.00
   -7    1    3     -1.33      0.00
   -5    1    3     -2.04      0.00
   -3    1    3     -2.28      0.00
   -1    1    3     -1.01      0.00
    1    1    3      0.42      0.00
    3    1    3      0.53      0.00
    5    1    3      0.10      0.00
    7    1    3      0.01      0.00
    9    1    3     -0.07      0.00
   11    1    3     -0.37      0.00
   13    1    3     -0.60      0.00
   15    1    3     -0.33      0.00
  -16    2    3      1.24      0.00
  -14    2    3      1.96      0.00
  -12    2    3      2.14      0.00
  -10    2    3      1.90      0.00
   -8    2    3      1.80      0.00
   -6    2    3      2.47      0.00
   -4    2    3      3.35      0.00
   -2    2    3      2.24      0.00
    0    2    3     -0.52      0.00
    2    2    3     -1.60      0.00
    4    2    3     -0.75      0.00
    6    2    3     -0.19      0.00
    8    2    3     -0.16      0.00
   10    2    3      0.17      0.00
   12    2    3      0.82      0.00
   14    2    3      0.92      0.00
   16    2    3      0.21      0.00
  -15    3    3     -1.37      0.00
  -13    3    3     -1.92      0.00
  -11    3    3     -1.93      0.00
   -9    3    3     -1.74      0.00
   -7    3    3     -1.87      0.00
   -5    3    3     -2.59      0.00
   -3    3    3     -2.27      0.00
   -1    3    3      0.56      0.00
    1    3    3      2.84      0.00
    3    3    3      2.10      0.00
    5    3    3      0.73      0.00
    7    3    3      0.46      0.00
    9    3    3      0.38      0.00
   11    3    3     -0.26      0.00
   13    3    3     -0.98      0.00
   15    3    3     -0.69      0.00
  -16    4    3      0.38      0.00
  -14    4    3      0.94      0.00
  -12    4    3      1.22      0.00
  -10    4    3      1.22      0.00
   -8    4    3      1.14      0.00
   -6    4    3      1.22      0.00
   -4    4    3      1.16      0.00
   -2    4    3     -0.80      0.00
    0    4    3     -3.59      0.00
    2    4    3     -3.58      0.00
    4    4    3     -1.64      0.00
    6    4    3     -0.72      0.00
    8    4    3     -0.75      0.00
   10    4    3     -0.61      0.00
   12    4    3      0.13      0.00
   14    4    3      0.63      0.00
  -15    5    3     -0.08      0.00
  -13    5    3     -0.35      0.00
  -11    5    3     -0.41      0.00
   -9    5    3     -0.43      0.00
   -7    5    3     -0.26      0.00
   -5    5    3      0.01      0.00
   -3    5    3      1.14      0.00
   -1    5    3      3.54      0.00
    1    5    3      4.38      0.00
    3    5    3      2.60      0.00
    5    5    3      1.01      0.00
    7    5    3      0.75      0.00
    9    5    3      0.97      0.00
   11    5    3      0.91      0.00
   13    5    3      0.25      0.00
   15    5    3     -0.04      0.00
  -14    6    3      0.00      0.00
  -12    6    3     -0.14      0.00
  -10    6    3     -0.25      0.00
   -8    6    3     -0.30      0.00
   -6    6    3     -0.61      0.00
   -4    6    3     -1.32      0.00
   -2    6    3     -2.98      0.00
    0    6    3     -4.26      0.00
    2    6    3     -3.19      0.00
    4    6    3     -1.36      0.00
    6    6    3     -0.64      0.00
    8    6    3     -0.73      0.00
   10    6    3     -1.17      0.00
   12    6    3     -1.13      0.00
   14    6    3     -0.53      0.00
  -15    7    3     -0.25      0.00
  -13    7    3      0.05      0.00
  -11    7    3      0.58      0.00
   -9    7    3      0.71      0.00
   -7    7    3      0.79      0.00
   -5    7    3      1.22      0.00
   -3    7    3      2.31      0.00
   -1    7    3      3.64      0.00
    1    7    3      3.35      0.00
    3    7    3      1.69      0.00
    5    7    3      0.60      0.00
    7    7    3      0.34      0.00
    9    7    3      0.65      0.00
   11    7    3      1.11      0.00
   13    7    3      0.87      0.00
[truncated: 38,586 more chars]
