# Supplementary material for: Virtual Screening, Structural Analysis, and Formation Thermodynamics of Carbamazepine Cocrystals
Source: Pharmaceutics. 2023 Mar 3;15(3):836. doi: 10.3390/pharmaceutics15030836 (PMC10052035; doi:10.3390/pharmaceutics15030836)
Supplement: Supplementary file 1 [file pharmaceutics-15-00836-s001.zip › [CBZ+3AcAmBA].cif]

 
data_[CBZ+3AcAmBA]
 
_audit_creation_method            'SHELXL-2018/3'
_shelx_SHELXL_version_number      '2018/3'
_chemical_name_systematic         ?
_chemical_name_common             ?
_chemical_melting_point           ?
_chemical_formula_moiety          'C15 H12 N2 O, C9 H9 N O3'
_chemical_formula_sum
 'C24 H21 N3 O4' 
_chemical_formula_weight          415.44

loop_
 _atom_type_symbol
 _atom_type_description
 _atom_type_scat_dispersion_real
 _atom_type_scat_dispersion_imag
 _atom_type_scat_source
 'C'  'C'   0.0033   0.0016
 'International Tables Vol C Tables 4.2.6.8 and 6.1.1.4'
 'H'  'H'   0.0000   0.0000
 'International Tables Vol C Tables 4.2.6.8 and 6.1.1.4'
 'N'  'N'   0.0061   0.0033
 'International Tables Vol C Tables 4.2.6.8 and 6.1.1.4'
 'O'  'O'   0.0106   0.0060
 'International Tables Vol C Tables 4.2.6.8 and 6.1.1.4'
 
_space_group_crystal_system       monoclinic
_space_group_IT_number            14
_space_group_name_H-M_alt         'P 21/n'
_space_group_name_Hall            '-P 2yn'
 
_shelx_space_group_comment
;
The symmetry employed for this shelxl refinement is uniquely defined
by the following loop, which should always be used as a source of
symmetry information in preference to the above space-group names.
They are only intended as comments.
;
 
loop_
 _space_group_symop_operation_xyz
 'x, y, z'
 '-x+1/2, y+1/2, -z+1/2'
 '-x, -y, -z'
 'x-1/2, -y-1/2, z-1/2'
 
_cell_length_a                    7.0272(3)
_cell_length_b                    11.4177(4)
_cell_length_c                    25.3995(10)
_cell_angle_alpha                 90
_cell_angle_beta                  97.7026(15)
_cell_angle_gamma                 90
_cell_volume                      2019.53(14)
_cell_formula_units_Z             4
_cell_measurement_temperature     100(2)
_cell_measurement_reflns_used     6132
_cell_measurement_theta_min       2.929
_cell_measurement_theta_max       30.037
 
_exptl_crystal_description        prism
_exptl_crystal_colour             colourless
_exptl_crystal_density_meas       ?
_exptl_crystal_density_method     ?
_exptl_crystal_density_diffrn     1.366          
_exptl_crystal_F_000              872
_exptl_transmission_factor_min    ?
_exptl_transmission_factor_max    ?
_exptl_crystal_size_max           0.250
_exptl_crystal_size_mid           0.150
_exptl_crystal_size_min           0.100
_exptl_absorpt_coefficient_mu     0.095
_shelx_estimated_absorpt_T_min    0.977
_shelx_estimated_absorpt_T_max    0.991
_exptl_absorpt_correction_type    multi-scan
_exptl_absorpt_correction_T_min   0.8706
_exptl_absorpt_correction_T_max   0.9281
_exptl_absorpt_process_details    'SADABS (Bruker, 2016)'
_exptl_absorpt_special_details    ?
_diffrn_ambient_temperature       100(2)
_diffrn_radiation_wavelength      0.71073
_diffrn_radiation_type            MoK\a
_diffrn_source                    ?
_diffrn_measurement_device_type   'Bruker D8 Venture'
_diffrn_measurement_method        \w
_diffrn_detector_area_resol_mean  ?
_diffrn_reflns_number             26443
_diffrn_reflns_av_unetI/netI      0.0405
_diffrn_reflns_av_R_equivalents   0.0553
_diffrn_reflns_limit_h_min        -8
_diffrn_reflns_limit_h_max        8
_diffrn_reflns_limit_k_min        -14
_diffrn_reflns_limit_k_max        14
_diffrn_reflns_limit_l_min        -32
_diffrn_reflns_limit_l_max        32
_diffrn_reflns_theta_min          1.959
_diffrn_reflns_theta_max          26.997
_diffrn_reflns_theta_full         25.242
_diffrn_measured_fraction_theta_max   1.000
_diffrn_measured_fraction_theta_full  1.000
_diffrn_reflns_Laue_measured_fraction_max    1.000
_diffrn_reflns_Laue_measured_fraction_full   1.000
_diffrn_reflns_point_group_measured_fraction_max   1.000
_diffrn_reflns_point_group_measured_fraction_full  1.000
_reflns_number_total              4407
_reflns_number_gt                 3385
_reflns_threshold_expression      'I > 2\s(I)'
_reflns_Friedel_coverage          0.000
_reflns_Friedel_fraction_max      .
_reflns_Friedel_fraction_full     .
 
_reflns_special_details
;
 Reflections were merged by SHELXL according to the crystal
 class for the calculation of statistics and refinement.
 
 _reflns_Friedel_fraction is defined as the number of unique
 Friedel pairs measured divided by the number that would be
 possible theoretically, ignoring centric projections and
 systematic absences.
;
 
_computing_data_collection        '<i>APEX3</i> (Bruker, 2018)'
_computing_cell_refinement        'SAINT (Bruker, 2018)'
_computing_data_reduction         'SAINT (Bruker, 2018)'
_computing_structure_solution     'SHELXT (Sheldrick, 2016)'
_computing_structure_refinement 'SHELXL-2018/3 (Sheldrick, 2018)'
_computing_molecular_graphics     ?
_computing_publication_material   ?
_refine_special_details           ?
_refine_ls_structure_factor_coef  Fsqd
_refine_ls_matrix_type            full
_refine_ls_weighting_scheme       calc
_refine_ls_weighting_details
'w=1/[\s^2^(Fo^2^)+(0.0319P)^2^+0.9205P] where P=(Fo^2^+2Fc^2^)/3'
_atom_sites_solution_primary      direct
_atom_sites_solution_secondary    difmap
_atom_sites_solution_hydrogens    difmap
_refine_ls_hydrogen_treatment     refall
_refine_ls_extinction_method      'SHELXL-2018/3 (Sheldrick 2018)'
_refine_ls_extinction_coef        0.0048(6)
_refine_ls_extinction_expression
 'Fc^*^=kFc[1+0.001xFc^2^\l^3^/sin(2\q)]^-1/4^'
_refine_ls_number_reflns          4407
_refine_ls_number_parameters      365
_refine_ls_number_restraints      0
_refine_ls_R_factor_all           0.0624
_refine_ls_R_factor_gt            0.0410
_refine_ls_wR_factor_ref          0.0912
_refine_ls_wR_factor_gt           0.0837
_refine_ls_goodness_of_fit_ref    1.024
_refine_ls_restrained_S_all       1.024
_refine_ls_shift/su_max           0.001
_refine_ls_shift/su_mean          0.000
 
loop_
 _atom_site_label
 _atom_site_type_symbol
 _atom_site_fract_x
 _atom_site_fract_y
 _atom_site_fract_z
 _atom_site_U_iso_or_equiv
 _atom_site_adp_type
 _atom_site_occupancy
 _atom_site_site_symmetry_order  
 _atom_site_calc_flag
 _atom_site_refinement_flags_posn
 _atom_site_refinement_flags_adp
 _atom_site_refinement_flags_occupancy
 _atom_site_disorder_assembly
 _atom_site_disorder_group
N11 N 0.00394(18) 0.89711(12) 0.44392(5) 0.0155(3) Uani 1 1 d . . . . .
H11 H -0.040(2) 0.9708(17) 0.4529(7) 0.027(5) Uiso 1 1 d . . . . .
H12 H -0.004(3) 0.8805(16) 0.4094(8) 0.029(5) Uiso 1 1 d . . . . .
N12 N 0.18441(17) 0.73110(11) 0.46923(5) 0.0153(3) Uani 1 1 d . . . . .
O11 O 0.12771(15) 0.86978(9) 0.52971(4) 0.0192(2) Uani 1 1 d . . . . .
C10 C 0.1064(2) 0.83600(13) 0.48273(6) 0.0141(3) Uani 1 1 d . . . . .
C11 C 0.1718(2) 0.69211(13) 0.41504(6) 0.0167(3) Uani 1 1 d . . . . .
C12 C 0.3267(2) 0.70931(13) 0.38663(6) 0.0210(4) Uani 1 1 d . . . . .
C13 C 0.3024(3) 0.67442(15) 0.33307(7) 0.0274(4) Uani 1 1 d . . . . .
C14 C 0.1356(3) 0.62237(15) 0.30982(7) 0.0293(4) Uani 1 1 d . . . . .
C15 C -0.0147(3) 0.60439(15) 0.33908(7) 0.0267(4) Uani 1 1 d . . . . .
C16 C 0.0034(2) 0.63906(14) 0.39190(6) 0.0206(3) Uani 1 1 d . . . . .
C17 C 0.5099(2) 0.75898(14) 0.41064(7) 0.0251(4) Uani 1 1 d . . . . .
C21 C 0.3217(2) 0.67334(13) 0.50773(6) 0.0163(3) Uani 1 1 d . . . . .
C22 C 0.5175(2) 0.68981(13) 0.50496(6) 0.0204(3) Uani 1 1 d . . . . .
C23 C 0.6490(2) 0.64317(15) 0.54609(7) 0.0250(4) Uani 1 1 d . . . . .
C24 C 0.5887(3) 0.57957(14) 0.58681(7) 0.0253(4) Uani 1 1 d . . . . .
C25 C 0.3944(2) 0.55913(14) 0.58731(6) 0.0222(4) Uani 1 1 d . . . . .
C26 C 0.2608(2) 0.60636(13) 0.54776(6) 0.0186(3) Uani 1 1 d . . . . .
C27 C 0.5896(2) 0.75155(14) 0.46144(7) 0.0253(4) Uani 1 1 d . . . . .
H13 H 0.409(3) 0.6870(16) 0.3130(7) 0.034(5) Uiso 1 1 d . . . . .
H14 H 0.122(3) 0.6007(16) 0.2730(7) 0.031(5) Uiso 1 1 d . . . . .
H15 H -0.133(3) 0.5690(16) 0.3230(7) 0.027(5) Uiso 1 1 d . . . . .
H16 H -0.102(3) 0.6296(15) 0.4123(7) 0.027(5) Uiso 1 1 d . . . . .
H17 H 0.588(3) 0.7980(17) 0.3846(7) 0.036(5) Uiso 1 1 d . . . . .
H23 H 0.786(3) 0.6582(16) 0.5447(7) 0.028(5) Uiso 1 1 d . . . . .
H24 H 0.683(2) 0.5499(15) 0.6157(7) 0.022(4) Uiso 1 1 d . . . . .
H25 H 0.350(3) 0.5109(17) 0.6177(7) 0.034(5) Uiso 1 1 d . . . . .
H26 H 0.119(2) 0.5958(15) 0.5473(6) 0.022(4) Uiso 1 1 d . . . . .
N1 N 0.36713(18) 0.83661(11) 0.62801(5) 0.0165(3) Uani 1 1 d . . . . .
H1 H 0.295(3) 0.8378(16) 0.5957(7) 0.029(5) Uiso 1 1 d . . . . .
O1 O 0.40946(16) 0.56349(10) 0.83159(4) 0.0244(3) Uani 1 1 d . . . . .
O2 O 0.61794(17) 0.55165(11) 0.77243(4) 0.0259(3) Uani 1 1 d . . . . .
H2 H 0.690(3) 0.508(2) 0.7966(9) 0.051(7) Uiso 1 1 d . . . . .
O3 O 0.63956(16) 0.90409(10) 0.67609(4) 0.0247(3) Uani 1 1 d . . . . .
C1 C 0.4541(2) 0.58495(13) 0.78816(6) 0.0180(3) Uani 1 1 d . . . . .
C2 C 0.3289(2) 0.65165(13) 0.74657(6) 0.0165(3) Uani 1 1 d . . . . .
C3 C 0.4077(2) 0.70989(13) 0.70647(6) 0.0160(3) Uani 1 1 d . . . . .
C4 C 0.2906(2) 0.77614(13) 0.66925(6) 0.0161(3) Uani 1 1 d . . . . .
C5 C 0.0936(2) 0.77882(14) 0.67081(6) 0.0203(3) Uani 1 1 d . . . . .
C6 C 0.0152(2) 0.71866(15) 0.71004(7) 0.0236(4) Uani 1 1 d . . . . .
C7 C 0.1322(2) 0.65681(14) 0.74869(6) 0.0207(3) Uani 1 1 d . . . . .
C8 C 0.5345(2) 0.89461(13) 0.63312(6) 0.0178(3) Uani 1 1 d . . . . .
C9 C 0.5918(3) 0.94589(16) 0.58333(7) 0.0232(4) Uani 1 1 d . . . . .
H3 H 0.543(2) 0.7063(14) 0.7047(6) 0.015(4) Uiso 1 1 d . . . . .
H5 H 0.015(2) 0.8219(15) 0.6449(7) 0.021(4) Uiso 1 1 d . . . . .
H6 H -0.129(3) 0.7188(16) 0.7105(7) 0.033(5) Uiso 1 1 d . . . . .
H7 H 0.078(2) 0.6169(16) 0.7769(7) 0.026(5) Uiso 1 1 d . . . . .
H91 H 0.487(3) 0.9454(19) 0.5552(8) 0.048(6) Uiso 1 1 d . . . . .
H92 H 0.644(3) 1.0243(17) 0.5906(7) 0.031(5) Uiso 1 1 d . . . . .
H93 H 0.701(3) 0.8985(19) 0.5724(8) 0.049(6) Uiso 1 1 d . . . . .
H27 H 0.721(3) 0.7853(17) 0.4715(7) 0.037(5) Uiso 1 1 d . . . . .
 
loop_
 _atom_site_aniso_label
 _atom_site_aniso_U_11
 _atom_site_aniso_U_22
 _atom_site_aniso_U_33
 _atom_site_aniso_U_23
 _atom_site_aniso_U_13
 _atom_site_aniso_U_12
N11 0.0193(7) 0.0139(7) 0.0132(7) -0.0006(5) 0.0018(5) 0.0035(5)
N12 0.0164(7) 0.0147(6) 0.0145(6) -0.0009(5) 0.0011(5) 0.0039(5)
O11 0.0243(6) 0.0184(6) 0.0140(5) -0.0026(4) -0.0012(4) 0.0065(4)
C10 0.0125(7) 0.0146(7) 0.0154(7) 0.0002(6) 0.0021(6) -0.0015(6)
C11 0.0232(8) 0.0126(7) 0.0144(7) -0.0004(6) 0.0030(6) 0.0062(6)
C12 0.0293(9) 0.0128(7) 0.0225(8) 0.0030(6) 0.0089(7) 0.0053(7)
C13 0.0421(11) 0.0215(9) 0.0213(9) 0.0060(7) 0.0149(8) 0.0093(8)
C14 0.0488(12) 0.0242(9) 0.0145(8) -0.0005(7) 0.0032(8) 0.0140(8)
C15 0.0335(10) 0.0226(9) 0.0218(9) -0.0045(7) -0.0039(7) 0.0070(8)
C16 0.0238(9) 0.0180(8) 0.0198(8) -0.0014(6) 0.0020(7) 0.0046(7)
C17 0.0263(9) 0.0187(8) 0.0336(10) 0.0026(7) 0.0163(8) 0.0012(7)
C21 0.0170(8) 0.0130(7) 0.0184(8) -0.0040(6) 0.0004(6) 0.0033(6)
C22 0.0201(8) 0.0146(8) 0.0263(9) -0.0040(7) 0.0026(6) 0.0016(6)
C23 0.0164(9) 0.0216(9) 0.0359(10) -0.0057(7) -0.0011(7) 0.0047(7)
C24 0.0293(10) 0.0159(8) 0.0274(9) -0.0041(7) -0.0076(7) 0.0086(7)
C25 0.0326(10) 0.0126(7) 0.0205(8) -0.0016(7) -0.0002(7) 0.0035(7)
C26 0.0207(9) 0.0167(8) 0.0185(8) -0.0030(6) 0.0026(6) 0.0010(6)
C27 0.0175(9) 0.0192(8) 0.0404(10) -0.0001(7) 0.0088(7) -0.0009(7)
N1 0.0187(7) 0.0165(7) 0.0129(6) 0.0013(5) -0.0027(5) -0.0007(5)
O1 0.0336(7) 0.0251(6) 0.0144(5) 0.0014(5) 0.0030(5) -0.0003(5)
O2 0.0255(7) 0.0318(7) 0.0200(6) 0.0077(5) 0.0017(5) 0.0117(5)
O3 0.0235(6) 0.0269(6) 0.0216(6) 0.0003(5) -0.0046(5) -0.0079(5)
C1 0.0211(8) 0.0155(8) 0.0170(8) -0.0023(6) 0.0010(6) -0.0009(6)
C2 0.0197(8) 0.0149(7) 0.0146(7) -0.0031(6) 0.0011(6) 0.0007(6)
C3 0.0144(8) 0.0165(8) 0.0168(7) -0.0027(6) 0.0008(6) -0.0005(6)
C4 0.0193(8) 0.0145(7) 0.0138(7) -0.0028(6) 0.0000(6) -0.0006(6)
C5 0.0176(8) 0.0214(8) 0.0209(8) 0.0010(7) -0.0012(6) 0.0041(7)
C6 0.0152(8) 0.0286(9) 0.0274(9) 0.0000(7) 0.0042(7) 0.0018(7)
C7 0.0218(9) 0.0222(8) 0.0192(8) -0.0018(7) 0.0059(7) -0.0014(7)
C8 0.0205(8) 0.0128(7) 0.0193(8) -0.0009(6) -0.0003(6) 0.0013(6)
C9 0.0251(9) 0.0206(9) 0.0233(9) 0.0019(7) 0.0017(7) -0.0045(7)
 
_geom_special_details
;
 All esds (except the esd in the dihedral angle between two l.s. planes)
 are estimated using the full covariance matrix.  The cell esds are taken
 into account individually in the estimation of esds in distances, angles
 and torsion angles; correlations between esds in cell parameters are only
 used when they are defined by crystal symmetry.  An approximate (isotropic)
 treatment of cell esds is used for estimating esds involving l.s. planes.
;
 
loop_
 _geom_bond_atom_site_label_1
 _geom_bond_atom_site_label_2
 _geom_bond_distance
 _geom_bond_site_symmetry_2
 _geom_bond_publ_flag
N11 C10 1.3366(19) . ?
N11 H11 0.934(19) . ?
N11 H12 0.893(19) . ?
N12 C10 1.3795(18) . ?
N12 C11 1.4379(18) . ?
N12 C21 1.4383(19) . ?
O11 C10 1.2439(17) . ?
C11 C16 1.387(2) . ?
C11 C12 1.398(2) . ?
C12 C13 1.406(2) . ?
C12 C17 1.463(2) . ?
C13 C14 1.374(3) . ?
C13 H13 0.973(19) . ?
C14 C15 1.386(3) . ?
C14 H14 0.959(18) . ?
C15 C16 1.388(2) . ?
C15 H15 0.966(18) . ?
C16 H16 0.966(18) . ?
C17 C27 1.339(2) . ?
C17 H17 1.015(19) . ?
C21 C26 1.385(2) . ?
C21 C22 1.400(2) . ?
C22 C23 1.403(2) . ?
C22 C27 1.458(2) . ?
C23 C24 1.376(3) . ?
C23 H23 0.982(18) . ?
C24 C25 1.387(2) . ?
C24 H24 0.983(17) . ?
C25 C26 1.388(2) . ?
C25 H25 1.029(19) . ?
C26 H26 1.005(17) . ?
C27 H27 1.00(2) . ?
N1 C8 1.341(2) . ?
N1 C4 1.4192(19) . ?
N1 H1 0.903(19) . ?
O1 C1 1.2115(18) . ?
O2 C1 1.3243(19) . ?
O2 H2 0.90(2) . ?
O3 C8 1.2378(18) . ?
C1 C2 1.490(2) . ?
C2 C7 1.391(2) . ?
C2 C3 1.392(2) . ?
C3 C4 1.391(2) . ?
C3 H3 0.957(16) . ?
C4 C5 1.390(2) . ?
C5 C6 1.384(2) . ?
C5 H5 0.941(17) . ?
C6 C7 1.386(2) . ?
C6 H6 1.015(19) . ?
C7 H7 0.969(18) . ?
C8 C9 1.497(2) . ?
C9 H91 0.95(2) . ?
C9 H92 0.98(2) . ?
C9 H93 1.01(2) . ?
 
loop_
 _geom_angle_atom_site_label_1
 _geom_angle_atom_site_label_2
 _geom_angle_atom_site_label_3
 _geom_angle
 _geom_angle_site_symmetry_1
 _geom_angle_site_symmetry_3
 _geom_angle_publ_flag
C10 N11 H11 116.9(11) . . ?
C10 N11 H12 124.7(12) . . ?
H11 N11 H12 116.9(16) . . ?
C10 N12 C11 122.08(12) . . ?
C10 N12 C21 118.80(12) . . ?
C11 N12 C21 117.30(12) . . ?
O11 C10 N11 121.95(13) . . ?
O11 C10 N12 120.46(13) . . ?
N11 C10 N12 117.56(13) . . ?
C16 C11 C12 121.42(14) . . ?
C16 C11 N12 118.71(13) . . ?
C12 C11 N12 119.87(14) . . ?
C11 C12 C13 117.23(15) . . ?
C11 C12 C17 122.81(14) . . ?
C13 C12 C17 119.95(15) . . ?
C14 C13 C12 121.62(16) . . ?
C14 C13 H13 120.8(11) . . ?
C12 C13 H13 117.5(11) . . ?
C13 C14 C15 120.05(16) . . ?
C13 C14 H14 119.9(11) . . ?
C15 C14 H14 120.0(11) . . ?
C14 C15 C16 119.89(17) . . ?
C14 C15 H15 120.8(10) . . ?
C16 C15 H15 119.3(10) . . ?
C11 C16 C15 119.75(16) . . ?
C11 C16 H16 119.6(10) . . ?
C15 C16 H16 120.6(10) . . ?
C27 C17 C12 127.46(15) . . ?
C27 C17 H17 117.6(11) . . ?
C12 C17 H17 114.8(11) . . ?
C26 C21 C22 120.89(14) . . ?
C26 C21 N12 120.49(14) . . ?
C22 C21 N12 118.58(13) . . ?
C21 C22 C23 117.71(15) . . ?
C21 C22 C27 123.14(15) . . ?
C23 C22 C27 119.15(15) . . ?
C24 C23 C22 121.43(16) . . ?
C24 C23 H23 121.4(10) . . ?
C22 C23 H23 117.2(10) . . ?
C23 C24 C25 119.89(16) . . ?
C23 C24 H24 119.8(10) . . ?
C25 C24 H24 120.3(10) . . ?
C24 C25 C26 119.92(16) . . ?
C24 C25 H25 119.4(10) . . ?
C26 C25 H25 120.6(10) . . ?
C21 C26 C25 120.02(15) . . ?
C21 C26 H26 117.5(9) . . ?
C25 C26 H26 122.5(9) . . ?
C17 C27 C22 128.22(16) . . ?
C17 C27 H27 118.3(11) . . ?
C22 C27 H27 113.3(11) . . ?
C8 N1 C4 125.68(13) . . ?
C8 N1 H1 117.1(12) . . ?
C4 N1 H1 117.2(12) . . ?
C1 O2 H2 112.9(14) . . ?
O1 C1 O2 123.94(14) . . ?
O1 C1 C2 123.27(14) . . ?
O2 C1 C2 112.80(13) . . ?
C7 C2 C3 120.17(14) . . ?
C7 C2 C1 119.30(14) . . ?
C3 C2 C1 120.52(14) . . ?
C4 C3 C2 120.00(14) . . ?
C4 C3 H3 119.5(9) . . ?
C2 C3 H3 120.5(9) . . ?
C5 C4 C3 119.55(14) . . ?
C5 C4 N1 119.18(13) . . ?
C3 C4 N1 121.20(14) . . ?
C6 C5 C4 120.23(15) . . ?
C6 C5 H5 120.6(10) . . ?
C4 C5 H5 119.2(10) . . ?
C5 C6 C7 120.47(15) . . ?
C5 C6 H6 120.1(10) . . ?
C7 C6 H6 119.4(10) . . ?
C6 C7 C2 119.47(15) . . ?
C6 C7 H7 120.7(10) . . ?
C2 C7 H7 119.8(10) . . ?
O3 C8 N1 122.70(14) . . ?
O3 C8 C9 120.97(15) . . ?
N1 C8 C9 116.32(14) . . ?
C8 C9 H91 111.2(13) . . ?
C8 C9 H92 109.6(11) . . ?
H91 C9 H92 112.4(17) . . ?
C8 C9 H93 108.8(12) . . ?
H91 C9 H93 109.3(17) . . ?
H92 C9 H93 105.2(16) . . ?
 
loop_
 _geom_torsion_atom_site_label_1
 _geom_torsion_atom_site_label_2
 _geom_torsion_atom_site_label_3
 _geom_torsion_atom_site_label_4
 _geom_torsion
 _geom_torsion_site_symmetry_1
 _geom_torsion_site_symmetry_2
 _geom_torsion_site_symmetry_3
 _geom_torsion_site_symmetry_4
 _geom_torsion_publ_flag
C11 N12 C10 O11 -176.58(13) . . . . ?
C21 N12 C10 O11 -12.4(2) . . . . ?
C11 N12 C10 N11 5.3(2) . . . . ?
C21 N12 C10 N11 169.44(13) . . . . ?
C10 N12 C11 C16 -81.07(18) . . . . ?
C21 N12 C11 C16 114.52(15) . . . . ?
C10 N12 C11 C12 98.19(17) . . . . ?
C21 N12 C11 C12 -66.22(18) . . . . ?
C16 C11 C12 C13 2.2(2) . . . . ?
N12 C11 C12 C13 -177.02(13) . . . . ?
C16 C11 C12 C17 -176.51(15) . . . . ?
N12 C11 C12 C17 4.3(2) . . . . ?
C11 C12 C13 C14 -1.9(2) . . . . ?
C17 C12 C13 C14 176.89(15) . . . . ?
C12 C13 C14 C15 0.8(3) . . . . ?
C13 C14 C15 C16 0.0(3) . . . . ?
C12 C11 C16 C15 -1.5(2) . . . . ?
N12 C11 C16 C15 177.76(14) . . . . ?
C14 C15 C16 C11 0.3(2) . . . . ?
C11 C12 C17 C27 29.3(3) . . . . ?
C13 C12 C17 C27 -149.42(18) . . . . ?
C10 N12 C21 C26 80.90(18) . . . . ?
C11 N12 C21 C26 -114.17(16) . . . . ?
C10 N12 C21 C22 -96.82(16) . . . . ?
C11 N12 C21 C22 68.11(18) . . . . ?
C26 C21 C22 C23 -4.4(2) . . . . ?
N12 C21 C22 C23 173.32(13) . . . . ?
C26 C21 C22 C27 174.99(15) . . . . ?
N12 C21 C22 C27 -7.3(2) . . . . ?
C21 C22 C23 C24 2.4(2) . . . . ?
C27 C22 C23 C24 -177.01(15) . . . . ?
C22 C23 C24 C25 0.9(2) . . . . ?
C23 C24 C25 C26 -2.3(2) . . . . ?
C22 C21 C26 C25 3.1(2) . . . . ?
N12 C21 C26 C25 -174.56(13) . . . . ?
C24 C25 C26 C21 0.3(2) . . . . ?
C12 C17 C27 C22 2.0(3) . . . . ?
C21 C22 C27 C17 -30.3(3) . . . . ?
C23 C22 C27 C17 149.10(18) . . . . ?
O1 C1 C2 C7 -22.3(2) . . . . ?
O2 C1 C2 C7 157.46(14) . . . . ?
O1 C1 C2 C3 156.62(15) . . . . ?
O2 C1 C2 C3 -23.6(2) . . . . ?
C7 C2 C3 C4 1.8(2) . . . . ?
C1 C2 C3 C4 -177.14(13) . . . . ?
C2 C3 C4 C5 -3.3(2) . . . . ?
C2 C3 C4 N1 179.88(13) . . . . ?
C8 N1 C4 C5 142.92(15) . . . . ?
C8 N1 C4 C3 -40.2(2) . . . . ?
C3 C4 C5 C6 1.8(2) . . . . ?
N1 C4 C5 C6 178.75(15) . . . . ?
C4 C5 C6 C7 1.1(2) . . . . ?
C5 C6 C7 C2 -2.6(2) . . . . ?
C3 C2 C7 C6 1.1(2) . . . . ?
C1 C2 C7 C6 -179.92(14) . . . . ?
C4 N1 C8 O3 -2.1(2) . . . . ?
C4 N1 C8 C9 176.45(14) . . . . ?
 
loop_
 _geom_hbond_atom_site_label_D 
 _geom_hbond_atom_site_label_H 
 _geom_hbond_atom_site_label_A 
 _geom_hbond_distance_DH 
 _geom_hbond_distance_HA 
 _geom_hbond_distance_DA 
 _geom_hbond_angle_DHA 
 _geom_hbond_site_symmetry_A 
 _geom_hbond_publ_flag
N1 H1 O11  0.903(19) 1.950(19) 2.8430(16) 169.3(17) . yes
O2 H2 O3  0.90(2) 1.76(2) 2.6182(16) 160(2) 2_646 yes
N11 H11 O11  0.934(19) 1.991(19) 2.9248(17) 178.2(16) 3_576 yes
N11 H12 O1  0.893(19) 2.088(19) 2.8768(16) 146.7(16) 4_575 yes
 
_refine_diff_density_max    0.232
_refine_diff_density_min   -0.176
_refine_diff_density_rms    0.044

_shelx_res_file
;
TITL a in P2(1)/n
    a.res
    created by SHELXL-2018/3 at 16:22:37 on 17-Aug-2022
CELL  0.71073   7.0272  11.4177  25.3995   90.000   97.7026   90.000
ZERR    4.000   0.0003   0.0004   0.0010    0.000    0.0015    0.000
LATT  1
SYMM 1/2-X, 1/2+Y, 1/2-Z
SFAC C H N O
UNIT 96 84 12 16
TEMP -173
SIZE .25 .15 .10

EQIV $1 1.5-X, -0.5+Y, 1.5-Z
EQIV $2 -X, 2-Y, 1-Z
EQIV $3 -0.5+X, 1.5-Y, -0.5+Z
HTAB N1 O11
HTAB O2 O3_$1
HTAB N11 O11_$2
HTAB N11 O1_$3

L.S. 10
BOND $H
CONF
ACTA
FMAP 2
PLAN 12
OMIT -2 54
OMIT 0 0 2

WGHT    0.031900    0.920500
EXTI    0.004841
FVAR       0.16785
N11   3    0.003944    0.897109    0.443920    11.00000    0.01934    0.01392 =
         0.01321   -0.00058    0.00177    0.00346
H11   2   -0.039645    0.970844    0.452858    11.00000    0.02747
H12   2   -0.003582    0.880486    0.409360    11.00000    0.02929
N12   3    0.184414    0.731097    0.469227    11.00000    0.01640    0.01468 =
         0.01449   -0.00094    0.00107    0.00391
O11   4    0.127714    0.869783    0.529708    11.00000    0.02434    0.01835 =
         0.01403   -0.00263   -0.00116    0.00647
C10   1    0.106416    0.835998    0.482725    11.00000    0.01246    0.01463 =
         0.01542    0.00016    0.00211   -0.00146
C11   1    0.171770    0.692108    0.415039    11.00000    0.02321    0.01258 =
         0.01440   -0.00036    0.00296    0.00623
C12   1    0.326684    0.709305    0.386626    11.00000    0.02932    0.01279 =
         0.02246    0.00302    0.00891    0.00534
C13   1    0.302356    0.674424    0.333071    11.00000    0.04210    0.02153 =
         0.02133    0.00598    0.01487    0.00930
C14   1    0.135627    0.622366    0.309825    11.00000    0.04885    0.02421 =
         0.01446   -0.00050    0.00315    0.01396
C15   1   -0.014652    0.604389    0.339079    11.00000    0.03347    0.02263 =
         0.02184   -0.00454   -0.00391    0.00696
C16   1    0.003443    0.639056    0.391904    11.00000    0.02378    0.01799 =
         0.01978   -0.00139    0.00205    0.00465
C17   1    0.509908    0.758979    0.410638    11.00000    0.02627    0.01875 =
         0.03363    0.00264    0.01630    0.00120
C21   1    0.321678    0.673339    0.507728    11.00000    0.01704    0.01299 =
         0.01839   -0.00399    0.00040    0.00331
C22   1    0.517546    0.689811    0.504956    11.00000    0.02010    0.01457 =
         0.02635   -0.00399    0.00260    0.00158
C23   1    0.648994    0.643170    0.546087    11.00000    0.01638    0.02159 =
         0.03592   -0.00571   -0.00108    0.00474
C24   1    0.588690    0.579567    0.586809    11.00000    0.02932    0.01594 =
         0.02737   -0.00412   -0.00761    0.00862
C25   1    0.394353    0.559131    0.587309    11.00000    0.03262    0.01257 =
         0.02050   -0.00160   -0.00018    0.00349
C26   1    0.260808    0.606355    0.547758    11.00000    0.02075    0.01667 =
         0.01849   -0.00298    0.00258    0.00099
C27   1    0.589580    0.751553    0.461438    11.00000    0.01754    0.01921 =
         0.04041   -0.00006    0.00882   -0.00094
H13   2    0.409320    0.686987    0.313015    11.00000    0.03357
H14   2    0.122013    0.600655    0.273048    11.00000    0.03138
H15   2   -0.133225    0.568972    0.323046    11.00000    0.02652
H16   2   -0.102217    0.629637    0.412278    11.00000    0.02703
H17   2    0.587640    0.798032    0.384650    11.00000    0.03599
H23   2    0.785775    0.658225    0.544687    11.00000    0.02796
H24   2    0.683417    0.549947    0.615742    11.00000    0.02201
H25   2    0.350479    0.510932    0.617744    11.00000    0.03404
H26   2    0.118598    0.595832    0.547262    11.00000    0.02213
N1    3    0.367126    0.836608    0.628015    11.00000    0.01872    0.01650 =
         0.01289    0.00132   -0.00274   -0.00074
H1    2    0.295403    0.837802    0.595723    11.00000    0.02909
O1    4    0.409463    0.563492    0.831589    11.00000    0.03356    0.02515 =
         0.01436    0.00135    0.00298   -0.00027
O2    4    0.617936    0.551651    0.772425    11.00000    0.02549    0.03183 =
         0.02003    0.00766    0.00173    0.01170
H2    2    0.689980    0.507627    0.796563    11.00000    0.05146
O3    4    0.639555    0.904092    0.676094    11.00000    0.02346    0.02687 =
         0.02163    0.00029   -0.00464   -0.00793
C1    1    0.454063    0.584947    0.788158    11.00000    0.02109    0.01551 =
         0.01703   -0.00232    0.00100   -0.00090
C2    1    0.328872    0.651648    0.746575    11.00000    0.01969    0.01494 =
         0.01462   -0.00310    0.00106    0.00070
C3    1    0.407681    0.709893    0.706468    11.00000    0.01437    0.01655 =
         0.01676   -0.00274    0.00078   -0.00048
C4    1    0.290587    0.776145    0.669254    11.00000    0.01934    0.01448 =
         0.01375   -0.00283    0.00004   -0.00062
C5    1    0.093647    0.778818    0.670811    11.00000    0.01760    0.02144 =
         0.02092    0.00101   -0.00123    0.00405
C6    1    0.015238    0.718663    0.710039    11.00000    0.01518    0.02857 =
         0.02737    0.00004    0.00419    0.00179
C7    1    0.132235    0.656813    0.748691    11.00000    0.02176    0.02218 =
         0.01916   -0.00180    0.00592   -0.00142
C8    1    0.534501    0.894608    0.633117    11.00000    0.02054    0.01278 =
         0.01932   -0.00085   -0.00026    0.00128
C9    1    0.591813    0.945895    0.583331    11.00000    0.02513    0.02058 =
         0.02332    0.00193    0.00168   -0.00452
H3    2    0.542783    0.706285    0.704706    11.00000    0.01461
H5    2    0.014609    0.821885    0.644870    11.00000    0.02057
H6    2   -0.128906    0.718832    0.710482    11.00000    0.03342
H7    2    0.078278    0.616854    0.776940    11.00000    0.02575
H91   2    0.487058    0.945364    0.555227    11.00000    0.04828
H92   2    0.644397    1.024338    0.590623    11.00000    0.03106
H93   2    0.701058    0.898485    0.572440    11.00000    0.04889
H27   2    0.721419    0.785250    0.471494    11.00000    0.03658
HKLF 4


REM  a in P2(1)/n
REM wR2 = 0.0912, GooF = S = 1.024, Restrained GooF = 1.024 for all data
REM R1 = 0.0410 for 3385 Fo > 4sig(Fo) and 0.0624 for all 4407 data
REM 365 parameters refined using 0 restraints

END

WGHT      0.0319      0.9205

REM Highest difference peak  0.232,  deepest hole -0.176,  1-sigma level  0.044
Q1    1   0.1979  0.6836  0.3179  11.00000  0.05    0.23
Q2    1   0.2391  0.7194  0.3983  11.00000  0.05    0.23
Q3    1   0.0045  0.5792  0.3722  11.00000  0.05    0.23
Q4    1   0.3955  0.7580  0.4045  11.00000  0.05    0.22
Q5    1   0.2769  0.7869  0.4546  11.00000  0.05    0.22
Q6    1   0.3860  0.6069  0.7595  11.00000  0.05    0.22
Q7    1   0.3435  0.7235  0.6782  11.00000  0.05    0.21
Q8    1   0.1944  0.7525  0.6657  11.00000  0.05    0.21
Q9    1   0.4837  0.5981  0.5946  11.00000  0.05    0.20
Q10   1   0.3241  0.5536  0.5615  11.00000  0.05    0.20
Q11   1   0.2092  0.8047  0.6807  11.00000  0.05    0.20
Q12   1   0.5405  0.7095  0.4781  11.00000  0.05    0.20
;
_shelx_res_checksum   37995

_shelx_hkl_file
;
  -1   0   0    0.11    0.07
   1   0   0    0.05    0.07
  -1   0   0   -0.06    0.06
   1   0   0    0.08    0.08
  -2   0   0  161.03    4.52
  -2   0   0  158.06    4.10
   2   0   0  159.29    4.09
   2   0   0  160.25    4.52
   2   0   0  158.03    4.47
  -2   0   0  159.55    4.48
  -3   0   0    0.92    0.27
   3   0   0    0.76    0.26
   3   0   0    0.98    0.29
  -3   0   0    0.53    0.29
  -4   0   0  142.78    4.40
   4   0   0  131.92    4.38
  -5   0   0   -0.14    0.45
   6   0   0   18.59    1.43
  -6   0   0   18.43    1.39
  -7   0   0    1.75    0.70
   7   0   0    0.56    0.62
   8   0   0   14.08    1.74
  -8   0   0   15.48    1.81
  -9   0   0    1.80    1.10
   9   0   0    0.84    0.93
   0   1   0    0.03    0.03
   0   1   0   -0.01    0.03
   0   1   0    0.01    0.03
  -1  -1   0   70.24    1.99
  -1  -1   0   74.41    1.96
   1  -1   0   74.08    2.03
   1  -1   0   72.34    2.11
   1  -1   0   76.08    2.11
  -1  -1   0   75.09    2.12
  -1  -1   0   71.19    2.12
   1   1   0   73.05    2.12
  -1   1   0   74.72    2.11
  -1   1   0   77.80    2.11
  -1   1   0   74.14    2.03
   2  -1   0  125.68    3.36
   2  -1   0  124.68    3.66
  -2  -1   0  122.71    3.65
  -2  -1   0  127.89    3.68
  -2  -1   0  126.57    3.23
  -2  -1   0  125.37    3.24
   2  -1   0  122.62    3.60
  -2   1   0  126.06    3.37
   2   1   0  122.11    3.62
  -2   1   0  128.46    3.66
   2   1   0  125.50    3.66
  -2   1   0  127.95    3.63
  -3  -1   0   10.04    0.71
  -3  -1   0   11.52    0.78
   3  -1   0   12.06    0.79
   3  -1   0   10.37    0.45
   3  -1   0    9.85    0.71
  -3   1   0   11.18    0.80
   3   1   0   10.21    0.72
   3   1   0   10.12    0.72
  -3   1   0   10.56    0.71
   4  -1   0   30.18    0.97
   4  -1   0   36.67    1.63
  -4  -1   0   29.71    1.49
   4  -1   0   30.09    0.98
  -4   1   0   29.63    1.46
   4   1   0   30.02    1.54
   5  -1   0    8.61    0.37
   5  -1   0    8.40    0.37
   5   1   0    8.90    1.20
  -5   1   0    9.20    0.90
  -6  -1   0    9.06    1.15
   6  -1   0   10.58    1.22
   6   1   0   10.63    1.27
  -6   1   0    8.31    1.12
  -7  -1   0    4.62    0.98
   7  -1   0    2.23    0.81
  -7   1   0    2.26    0.76
   7   1   0    4.81    1.05
  -8  -1   0    0.84    0.84
   8  -1   0    2.82    0.98
  -8   1   0    1.34    0.96
   8   1   0    2.82    0.93
   9  -1   0    2.70    1.15
  -9  -1   0   -0.93    0.98
  -9   1   0    0.33    1.08
   9   1   0    0.38    1.05
   0  -2   0  415.21   10.87
   0  -2   0  424.16   10.77
   0  -2   0  413.21   10.84
   0   2   0  421.22   10.88
   0   2   0  424.96   10.77
   1  -2   0  176.45    4.70
   1  -2   0  171.55    4.71
  -1  -2   0  174.04    4.64
  -1  -2   0  176.78    4.72
  -1  -2   0  177.18    4.75
  -1  -2   0  177.17    4.65
   1  -2   0  172.11    4.70
   1   2   0  182.58    4.76
  -1   2   0  172.94    4.71
  -1   2   0  170.01    4.68
   1   2   0  171.17    4.70
  -1   2   0  174.65    4.72
  -2  -2   0   21.68    0.71
   2  -2   0   20.77    0.91
  -2  -2   0   22.05    0.72
  -2  -2   0   22.55    0.97
   2  -2   0   21.07    0.94
   2  -2   0   21.90    0.81
  -2  -2   0   20.40    0.94
  -2  -2   0   21.80    0.96
  -2   2   0   21.70    0.82
  -2   2   0   19.62    0.91
  -2   2   0   20.88    1.03
   3  -2   0    1.63    0.38
  -3  -2   0    1.40    0.36
  -3  -2   0    1.52    0.14
   3  -2   0    1.96    0.41
  -3  -2   0    2.15    0.48
   3  -2   0    2.09    0.28
  -3  -2   0    1.73    0.16
  -3   2   0    2.11    0.42
  -3   2   0    1.35    0.35
   3   2   0    1.55    0.36
   3   2   0    1.62    0.36
   4  -2   0    5.29    0.40
   4  -2   0    4.05    0.64
  -4  -2   0    5.04    0.73
   4  -2   0    6.06    0.41
  -4   2   0    5.88    0.75
   4   2   0    4.61    0.68
   5  -2   0    1.60    0.27
  -5  -2   0    1.45    0.48
   5  -2   0    1.42    0.27
   5   2   0    0.86    0.46
  -5   2   0    1.87    0.65
   6  -2   0   20.33    0.77
   6  -2   0   19.81    1.53
  -6  -2   0   21.46    1.52
   6  -2   0   20.91    0.78
   6   2   0   17.63    1.43
  -6   2   0   21.54    1.54
  -7  -2   0    9.21    1.37
   7  -2   0    9.59    1.33
   7   2   0   10.45    1.38
  -7   2   0    8.93    1.26
  -8  -2   0    2.61    0.96
   8  -2   0    2.44    0.95
  -8   2   0    2.00    1.02
   8   2   0    2.22    1.12
  -9  -2   0    1.30    1.10
   9  -2   0   -1.69    1.10
   9   2   0    2.14    1.02
  -9   2   0   -1.23    1.03
   0  -3   0    0.11    0.13
   0  -3   0    0.03    0.12
   0  -3   0   -0.03    0.07
   0   3   0    0.24    0.09
   0   3   0   -0.03    0.10
   1  -3   0    1.89    0.24
  -1  -3   0    2.34    0.29
  -1  -3   0    2.63    0.32
   1  -3   0    2.14    0.30
  -1  -3   0    1.99    0.26
  -1  -3   0    2.09    0.27
   1  -3   0    2.38    0.28
  -1   3   0    2.05    0.28
  -1   3   0    1.45    0.22
   1   3   0    2.44    0.28
   1   3   0    2.07    0.28
  -1   3   0    2.48    0.30
   2  -3   0   36.43    1.39
  -2  -3   0   37.64    1.24
   2  -3   0   37.13    1.33
  -2  -3   0   37.42    1.56
  -2  -3   0   38.18    1.43
  -2  -3   0   36.93    1.23
  -2  -3   0   37.12    1.45
  -2   3   0   38.65    1.40
   2   3   0   37.38    1.41
  -2   3   0   38.14    1.43
  -3  -3   0    2.93    0.48
   3  -3   0    4.11    0.43
  -3  -3   0    4.04    0.31
   3  -3   0    3.23    0.48
   3  -3   0    3.23    0.51
  -3  -3   0    4.24    0.30
  -3  -3   0    4.62    0.58
   3   3   0    4.08    0.55
  -3   3   0    4.36    0.55
  -3   3   0    4.77    0.59
   4  -3   0   11.14    0.67
  -4  -3   0   10.58    0.90
  -4  -3   0   11.67    0.47
   4  -3   0   12.79    0.70
   4  -3   0   11.67    0.91
  -4  -3   0   11.76    0.44
   4   3   0   13.54    0.97
  -4   3   0   11.25    0.86
   5  -3   0    0.32    0.30
   5  -3   0   -0.20    0.40
  -5  -3   0    0.30    0.39
   5  -3   0   -0.01    0.25
  -5   3   0    0.98    0.46
   5   3   0    0.21    0.38
   6  -3   0   20.59    0.94
  -6  -3   0   19.37    1.57
   6  -3   0   20.24    0.92
   6  -3   0   20.52    1.52
   6   3   0   17.29    1.42
  -6   3   0   19.36    1.45
   7  -3   0    3.05    0.41
  -7  -3   0    3.36    1.04
   7  -3   0    3.74    0.97
   7  -3   0    3.22    0.39
   7   3   0    3.67    0.93
  -7   3   0    0.62    0.74
  -8  -3   0    0.44    0.98
   8  -3   0   -1.65    0.85
  -8   3   0    0.70    0.84
   8   3   0    0.36    0.85
  -9  -3   0   -0.47    1.05
   9  -3   0    0.47    1.27
   9   3   0   -0.55    1.05
  -9   3   0    1.50    1.11
   0  -4   0  262.93    7.15
   0  -4   0  269.38    7.03
   0  -4   0  261.35    7.03
   0  -4   0  272.03    7.26
   0   4   0  264.13    7.17
  -1  -4   0    3.75    0.42
   1  -4   0    3.37    0.32
  -1  -4   0    3.27    0.38
   1  -4   0    2.64    0.38
  -1  -4   0    2.22    0.31
   1  -4   0    3.53    0.38
  -1  -4   0    3.03    0.39
  -1   4   0    2.71    0.36
   1   4   0    2.61    0.36
  -1   4   0    2.87    0.29
   1   4   0    2.14    0.30
  -2  -4   0    3.46    0.40
  -2  -4   0    3.53    0.44
   2  -4   0    3.90    0.46
   2  -4   0    3.05    0.45
  -2  -4   0    3.95    0.49
  -2  -4   0    3.05    0.42
  -2   4   0    3.79    0.47
   2   4   0    3.85    0.49
   2   4   0    3.01    0.40
  -2   4   0    3.69    0.49
  -2   4   0    3.05    0.40
  -3  -4   0   38.56    1.84
   3  -4   0   36.75    1.50
   3  -4   0   40.74    1.54
  -3  -4   0   38.89    1.37
   3  -4   0   36.25    1.75
   3  -4   0   42.28    1.69
  -3  -4   0   43.72    1.78
  -3  -4   0   38.52    1.35
   3   4   0   38.74    1.65
  -3   4   0   39.03    1.61
  -3   4   0   39.91    1.66
   4  -4   0    6.28    0.59
   4  -4   0    5.58    0.76
  -4  -4   0    6.01    0.39
  -4  -4   0    5.37    0.77
  -4  -4   0    5.60    0.43
   4  -4   0    5.57    0.62
  -4   4   0    4.86    0.67
   4   4   0    6.75    0.81
  -5  -4   0   12.10    0.47
   5  -4   0   13.17    0.82
   5  -4   0   13.73    0.88
  -5  -4   0   13.41    1.16
   5  -4   0   11.17    1.05
  -5  -4   0   11.73    0.46
  -5   4   0   12.63    1.14
   5   4   0   12.75    1.11
   6  -4   0    9.37    0.86
  -6  -4   0   12.67    1.44
   6  -4   0   11.01    1.31
   6  -4   0   12.28    0.81
   6   4   0   10.01    1.24
  -6   4   0   12.48    1.35
  -7  -4   0   12.18    1.74
   7  -4   0   14.08    0.88
   7  -4   0   16.60    1.54
   7  -4   0   15.80    1.00
   7   4   0   16.64    1.52
  -7   4   0   14.80    1.60
  -8  -4   0   16.18    1.87
   8  -4   0   14.36    1.89
  -8   4   0   18.80    1.83
   8   4   0   16.13    1.89
   9  -4   0    4.09    1.25
  -9   4   0    2.09    1.20
   9   4   0    2.10    1.29
   0  -5   0    0.52    0.20
   0  -5   0    0.42    0.15
   0  -5   0    0.08    0.16
   0  -5   0    0.11    0.22
   0  -5   0    0.11    0.20
   0   5   0    0.53    0.22
  -1  -5   0    5.73    0.50
  -1  -5   0    6.12    0.52
   1  -5   0    5.74    0.55
  -1  -5   0    5.38    0.47
  -1  -5   0    5.71    0.54
   1  -5   0    6.27    0.45
   1   5   0    6.32    0.46
  -1   5   0    6.10    0.49
  -1   5   0    5.80    0.43
   1   5   0    5.41    0.49
  -2  -5   0    0.72    0.34
  -2  -5   0    0.54    0.26
   2  -5   0    0.19    0.27
  -2  -5   0    0.20    0.27
   2  -5   0    0.29    0.23
  -2  -5   0    0.56    0.26
   2  -5   0    0.29    0.29
   2   5   0    0.51    0.29
  -2   5   0    0.39    0.26
   2   5   0    0.80    0.29
  -2   5   0    0.61    0.27
   3  -5   0   -0.10    0.28
  -3  -5   0    0.54    0.23
   3  -5   0    0.02    0.27
  -3  -5   0    0.05    0.28
  -3  -5   0    0.19    0.26
   3   5   0    0.50    0.32
  -3   5   0    0.30    0.34
  -3   5   0    0.20    0.32
  -4  -5   0    3.29    0.38
   4  -5   0    3.07    0.60
   4  -5   0    3.04    0.51
  -4  -5   0    2.80    0.41
   4   5   0    3.72    0.68
  -4   5   0    2.91    0.57
  -5  -5   0    1.81    0.28
   5  -5   0    0.19    0.51
  -5  -5   0    1.80    0.33
  -5  -5   0    1.43    0.59
   5  -5   0    1.95    0.47
   5   5   0    1.68    0.54
  -5   5   0    0.76    0.52
  -6  -5   0    4.31    0.87
   6  -5   0    4.94    1.00
   6  -5   0    6.41    0.77
  -6   5   0    5.69    1.02
   6   5   0    4.57    0.90
  -7  -5   0    0.54    0.83
   7  -5   0    0.17    0.71
   7  -5   0    0.23    0.50
   7   5   0    1.02    1.09
  -7   5   0    0.91    0.85
   8  -5   0    0.33    1.00
   8  -5   0    0.40    0.57
  -8  -5   0    0.14    1.04
   8   5   0   -0.27    0.87
  -8   5   0   -0.66    1.04
   9  -5   0    0.20    1.13
  -9  -5   0   -3.35    1.25
  -9   5   0   -0.65    1.42
   0  -6   0   67.36    2.16
   0  -6   0   69.45    2.18
   0  -6   0   70.36    2.37
   0  -6   0   66.75    2.43
   0   6   0   71.56    2.38
   1  -6   0    8.82    0.70
  -1  -6   0    7.28    0.53
   1  -6   0    6.52    0.58
  -1  -6   0    5.84    0.57
  -1  -6   0    7.67    0.65
   1  -6   0    6.74    0.64
  -1  -6   0    8.08    0.57
   1   6   0    7.20    0.61
  -1   6   0    6.97    0.50
  -1   6   0    6.29    0.55
   2  -6   0   66.30    2.22
   2  -6   0   62.72    2.33
  -2  -6   0   61.70    2.23
  -2  -6   0   64.68    2.25
  -2  -6   0   61.64    2.23
   2   6   0   65.19    2.40
  -2   6   0   63.27    2.28
   2   6   0   60.08    2.18
  -2   6   0   62.95    2.15
   3  -6   0    9.52    0.81
   3  -6   0    7.68    0.75
  -3  -6   0    9.73    0.70
  -3  -6   0    8.13    0.70
  -3  -6   0    9.13    0.83
  -3   6   0    8.50    0.79
   3   6   0    9.47    0.76
   4  -6   0    7.91    0.95
  -4  -6   0    9.39    1.09
   4  -6   0    7.41    0.73
  -4  -6   0    7.59    0.68
  -4  -6   0    7.93    0.62
   4   6   0    6.59    0.84
  -4   6   0    8.93    1.00
  -5  -6   0    3.63    0.83
  -5  -6   0    3.66    0.44
   5  -6   0    5.51    0.77
  -5  -6   0    4.45    0.54
   5  -6   0    4.70    0.81
  -5   6   0    4.79    0.86
   5   6   0    5.74    0.89
   6  -6   0   15.31    1.44
  -6  -6   0   12.53    1.46
   6  -6   0   12.47    1.07
  -6  -6   0   12.45    0.64
  -6  -6   0   13.55    0.61
   6   6   0   13.41    1.33
  -6   6   0   13.84    1.34
   7  -6   0   -0.45    0.74
   7  -6   0    0.34    0.60
  -7  -6   0    0.93    0.86
  -7   6   0   -1.20    0.81
   7   6   0    0.55    0.82
  -8  -6   0   -0.49    1.00
   8  -6   0    0.24    1.05
   8  -6   0    0.15    0.71
   8   6   0    0.03    1.07
  -8   6   0   -1.75    0.93
  -9  -6   0    1.56    1.33
   9   6   0    1.38    1.53
   0  -7   0    0.06    0.20
   0  -7   0   -0.40    0.24
   0  -7   0    0.02    0.24
   0   7   0    0.03    0.25
  -1  -7   0   18.56    0.92
   1  -7   0   18.43    1.12
   1  -7   0   18.83    0.91
  -1  -7   0   18.46    1.08
  -1   7   0   16.54    1.01
   1   7   0   18.10    1.07
  -1   7   0   17.55    0.87
  -2  -7   0   44.58    1.82
   2  -7   0   43.24    1.75
   2  -7   0   45.91    1.98
  -2  -7   0   44.95    1.86
   2   7   0   44.24    1.79
  -2   7   0   48.54    1.75
  -2   7   0   47.18    1.90
   2   7   0   48.65    2.01
   3  -7   0   10.31    0.86
  -3  -7   0    9.91    0.77
   3  -7   0    9.26    0.82
  -3   7   0    8.65    0.93
   3   7   0    9.80    0.80
   3   7   0    9.18    1.12
   4  -7   0    4.56    0.78
  -4  -7   0    4.39    0.78
   4  -7   0    3.48    0.90
  -4  -7   0    3.78    0.57
   4   7   0    3.39    0.78
  -4   7   0    4.25    0.78
   5  -7   0   20.96    1.51
  -5  -7   0   20.89    1.55
   5  -7   0   25.01    1.45
  -5  -7   0   21.48    1.20
  -5  -7   0   23.47    1.11
   5   7   0   20.08    1.47
  -5   7   0   21.23    1.49
  -6  -7   0    0.34    0.71
  -6  -7   0    0.83    0.35
   6  -7   0    1.04    0.70
  -6  -7   0    0.41    0.51
   6  -7   0    0.32    0.56
  -6   7   0   -0.45    0.70
   6   7   0    0.74    0.79
   7  -7   0    0.11    0.66
  -7  -7   0   -0.42    0.85
   7   7   0    0.78    0.82
  -7   7   0    1.00    0.97
   8  -7   0    0.35    1.19
   8  -7   0    0.93    0.83
  -8  -7   0    2.03    1.21
   8   7   0    1.24    1.12
  -8   7   0    0.72    1.26
   0  -8   0    4.48    0.50
   0  -8   0    5.63    0.76
   0   8   0    4.14    0.63
   1  -8   0   17.05    0.90
  -1  -8   0   14.28    1.01
  -1  -8   0   16.14    0.91
  -1  -8   0   15.47    0.96
  -1   8   0   16.08    0.90
  -1   8   0   15.96    1.05
   1   8   0   15.04    1.07
  -2  -8   0    0.07    0.33
   2  -8   0    0.92    0.49
   2  -8   0    0.42    0.32
   2   8   0    0.08    0.33
  -2   8   0   -0.08    0.32
   2   8   0    0.14    0.31
  -2   8   0    0.41    0.38
  -3  -8   0    8.26    0.87
   3  -8   0    7.63    0.92
   3  -8   0    8.94    0.85
   3   8   0    8.57    0.82
  -3   8   0    9.26    0.91
   3   8   0    7.40    0.95
   4  -8   0   12.61    1.19
   4  -8   0   14.20    1.14
  -4  -8   0   14.75    1.01
  -4  -8   0   17.35    1.43
   4   8   0   16.41    1.23
  -4   8   0   13.17    1.16
   5  -8   0    1.19    0.66
  -5  -8   0    0.13    0.42
  -5  -8   0    0.82    0.76
   5  -8   0    0.43    0.49
   5   8   0    1.57    0.64
  -5   8   0    1.13    0.64
   6  -8   0    5.75    0.95
  -6  -8   0    5.03    1.13
   6  -8   0    4.26    1.02
  -6  -8   0    4.42    0.61
  -6   8   0    5.17    1.08
   6   8   0    2.82    0.86
  -7  -8   0   -1.69    0.87
   7  -8   0   -0.39    0.78
   7  -8   0   -0.58    0.93
  -7   8   0    0.63    1.02
   7   8   0   -0.31    0.85
   8  -8   0    1.32    1.35
   8  -8   0    3.43    1.12
  -8   8   0    3.85    1.25
   8   8   0    0.95    1.27
   0  -9   0    0.06    0.37
   0  -9   0   -0.05    0.27
   0  -9   0    0.39    0.39
   0   9   0   -0.20    0.39
  -1  -9   0   22.68    1.40
   1  -9   0   21.84    1.41
  -1  -9   0   23.17    1.16
   1  -9   0   20.70    1.09
   1  -9   0   20.84    1.12
  -1  -9   0   20.63    1.16
   1   9   0   24.65    1.39
  -1   9   0   19.38    1.27
   2  -9   0   13.75    0.96
   2  -9   0   14.33    1.17
  -2  -9   0   13.73    1.00
  -2  -9   0   13.94    1.07
   2   9   0   13.76    1.17
  -2   9   0   14.59    1.12
   3  -9   0    1.67    0.58
  -3  -9   0    2.96    0.60
   3  -9   0    2.61    0.71
   3   9   0    1.60    0.67
  -3   9   0    2.98    0.68
   3   9   0    1.92    0.59
  -4  -9   0    1.50    0.62
  -4  -9   0    0.14    0.59
   4  -9   0    0.45    0.51
  -4   9   0    0.17    0.57
   4   9   0    0.89    0.55
   5  -9   0    8.99    1.17
   5  -9   0   10.62    1.23
  -5  -9   0    9.42    0.97
  -5  -9   0    7.31    1.22
   5   9   0    8.26    1.07
  -5   9   0    9.48    1.28
   6  -9   0    0.86    0.91
  -6  -9   0    0.27    0.86
  -6  -9   0    0.41    0.54
   6  -9   0    1.00    0.75
   6   9   0   -0.17    0.85
  -6   9   0    0.93    0.89
   7  -9   0   -0.02    1.07
   7  -9   0   -0.41    0.88
  -7  -9   0    1.97    1.14
  -7   9   0    0.07    1.00
   7   9   0   -0.22    1.05
   8  -9   0    0.24    1.42
  -8  -9   0    0.94    1.50
   8  -9   0    0.20    1.17
  -8   9   0    0.11    1.37
   8   9   0    2.09    1.44
   0 -10   0    0.71    0.48
   0 -10   0    0.70    0.40
   0 -10   0    2.01    0.55
   0  10   0    1.78    0.55
   1 -10   0    2.63    0.54
   1 -10   0    2.29    0.68
  -1 -10   0    2.58    0.56
  -1 -10   0    3.05    0.68
   1 -10   0    3.10    0.54
  -1  10   0    3.51    0.68
   1  10   0    2.34    0.65
  -2 -10   0    0.68    0.45
   2 -10   0    1.43    0.50
  -2 -10   0    1.62    0.56
   2 -10   0    0.77    0.55
  -2  10   0    1.37    0.62
   2  10   0    1.20    0.55
   3 -10   0   -0.28    0.49
   3 -10   0    0.52    0.56
  -3 -10   0    0.43    0.53
  -3  10   0   -0.11    0.47
   3  10   0   -0.44    0.62
  -4 -10   0   34.41    1.80
  -4 -10   0   29.67    2.09
   4 -10   0   29.98    1.84
   4 -10   0   32.76    1.93
   4  10   0   32.98    1.89
  -4  10   0   31.86    1.93
  -5 -10   0   -0.31    0.60
  -5 -10   0    0.44    0.81
   5 -10   0    1.82    0.83
   5 -10   0    0.76    0.78
   5  10   0   -0.62    0.69
  -5  10   0    0.67    0.76
  -6 -10   0    3.58    1.19
   6 -10   0    2.03    1.10
   6 -10   0    2.80    0.98
  -6 -10   0    3.34    0.79
   6  10   0    4.28    1.26
  -6  10   0    4.14    1.08
  -7 -10   0    0.53    1.22
   7 -10   0   -0.20    1.12
   7 -10   0   -1.63    1.04
  -7  10   0   -1.53    1.01
   7  10   0    0.29    1.10
   0 -11   0    0.22    0.43
   0 -11   0    1.40    0.63
   0  11   0   -0.36    0.53
   1 -11   0    1.23    0.62
  -1 -11   0    0.53    0.62
  -1 -11   0    2.22    0.53
   1 -11   0    1.26    0.50
  -1  11   0    0.14    0.55
   1  11   0    0.88    0.56
   2 -11   0   -0.24    0.54
  -2 -11   0    0.14    0.60
  -2 -11   0    1.32    0.55
   2 -11   0    0.57    0.52
  -2  11   0    1.11    0.59
   2  11   0    0.90    0.59
  -3 -11   0   11.94    1.32
   3 -11   0   15.92    1.41
   3 -11   0   11.27    1.19
  -3 -11   0   13.27    1.24
  -3  11   0    9.86    1.24
   3  11   0   10.77    1.38
  -4 -11   0    0.63    0.70
  -4 -11   0    0.86    1.26
   4 -11   0    1.43    0.77
   4 -11   0   -0.21    0.85
  -4  11   0    0.28    0.75
   4  11   0    0.84    0.69
   5 -11   0   25.37    1.95
  -5 -11   0   26.10    1.66
   5 -11   0   26.36    1.96
  -5 -11   0   26.66    2.24
   5  11   0   27.71    1.95
  -5  11   0   25.78    2.03
  -6 -11   0    0.89    0.87
   6 -11   0    0.18    1.01
  -6 -11   0   -0.31    1.19
   6 -11   0    0.29    1.05
   6  11   0    0.93    1.05
  -6  11   0   -0.84    0.90
  -7 -11   0    1.09    1.58
   7 -11   0    0.63    1.21
   7 -11   0    0.13    1.34
   7  11   0    1.99    1.35
  -7  11   0    2.34    1.35
   0 -12   0    1.22    0.55
   0 -12   0    0.07    0.65
   0  12   0    1.05    0.66
   1 -12   0    3.86    0.94
  -1 -12   0    3.62    0.90
   1 -12   0    4.85    0.74
  -1 -12   0    4.90    0.76
  -1  12   0    3.08    0.85
   1  12   0    3.97    0.92
  -2 -12   0    0.58    0.65
  -2 -12   0    0.31    0.60
   2 -12   0    0.70    0.72
   2 -12   0    0.48    0.59
   2  12   0   -0.67    0.71
  -2  12   0    0.15    0.62
   3 -12   0    1.54    0.78
   3 -12   0    1.39    0.90
  -3 -12   0    1.95    0.78
  -3 -12   0    0.79    0.74
  -3  12   0    3.10    0.90
   3  12   0    1.25    0.92
   4 -12   0   -0.51    0.81
  -4 -12   0    1.42    0.92
  -4 -12   0    0.05    0.77
  -4 -12   0   -0.27    0.79
   4 -12   0   -0.40    0.89
  -4  12   0   -0.45    0.79
  -5 -12   0   -0.59    0.81
   5 -12   0    0.23    0.94
   5 -12   0    0.62    1.00
  -5 -12   0   -0.22    1.10
  -5  12   0    0.57    1.01
   5  12   0    1.78    1.01
   6 -12   0    0.07    1.06
  -6 -12   0   -0.38    1.16
  -6 -12   0    1.37    0.95
  -6  12   0    0.78    1.28
   6  12   0    0.70    1.16
   0 -13   0   -0.55    0.58
   0 -13   0    0.06    0.79
   0  13   0    0.46    0.78
   1 -13   0   -0.73    0.68
   1 -13   0   -0.08    0.62
  -1 -13   0    0.02    0.63
  -1 -13   0    0.10    0.72
   1  13   0   -0.41    0.81
  -1  13   0    1.33    0.81
   2 -13   0   -0.45    0.77
  -2 -13   0    1.22    0.73
   2 -13   0   -0.24    0.71
  -2 -13   0    0.46    0.82
   2  13   0   -0.43    0.83
  -2  13   0    1.06    0.86
   3 -13   0    0.52    0.85
   3 -13   0    0.34    0.83
  -3 -13   0    0.74    0.87
  -3 -13   0   -0.42    0.81
  -3  13   0   -0.84    0.84
   3  13   0   -0.01    0.97
  -4 -13   0    3.06    1.03
   4 -13   0    1.79    1.00
  -4 -13   0    4.77    1.32
  -4 -13   0    1.94    0.99
   4 -13   0    1.09    0.92
  -4  13   0    2.85    1.07
   5 -13   0    3.90    1.30
  -5 -13   0    5.04    1.07
  -5 -13   0    6.52    1.59
  -5 -13   0    4.99    1.32
   5 -13   0    5.41    1.30
  -5  13   0    5.17    1.37
   6 -13   0   -1.55    1.11
  -6 -13   0    0.50    1.53
  -6  13   0   -1.08    1.32
   0 -14   0   -0.40    0.92
   0 -14   0    0.05    0.75
   0  14   0   -0.42    0.99
   1 -14   0    1.48    0.89
  -1 -14   0    0.40    0.73
  -1 -14   0    1.15    0.86
   1 -14   0    0.75    0.76
   1  14   0    0.70    0.94
   2 -14   0   -1.38    0.85
  -2 -14   0    0.31    0.83
  -2 -14   0    0.32    0.87
   2 -14   0   -0.70    0.79
  -2  14   0   -0.07    0.96
   2  14   0   -0.50    1.02
   3 -14   0   -0.18    0.94
  -3 -14   0    1.26    1.00
  -3 -14   0    1.03    0.92
  -3  14   0    1.27    1.07
   3  14   0    2.88    1.19
   4 -14   0    9.12    1.61
  -4 -14   0   10.44    1.47
  -4 -14   0    7.11    1.40
  -4 -14   0    7.26    1.71
  -4  14   0    4.96    1.39
  -5 -14   0    1.84    1.30
  -5 -14   0   -3.19    1.30
   5 -14   0    0.91    1.17
  -5 -14   0    0.66    1.19
  -5  14   0    0.85    1.36
   0 -15   0    1.27    1.09
   0  15   0   -1.48    1.07
  -1 -15   0    5.91    1.32
   1 -15   0    4.10    1.23
   1  15   0    4.22    1.29
  -1  15   0    6.38    1.44
  -2 -15   0    0.97    1.14
  -2  15   0    2.88    1.24
   2  15   0    0.55    1.19
  -3 -15   0   -0.62    1.20
   3 -15   0   -0.12    1.16
  -3  15   0    0.22    1.25
   0 -16   0    1.92    1.22
   0  16   0    1.60    1.45
   1 -16   0    0.37    1.19
  -1 -16   0    1.48    1.21
   1  16   0    3.34    1.49
  -1  16   0    0.56    1.30
  -9   0   1   -1.26    0.97
   9   0  -1    1.27    1.18
   8   0  -1   -1.23    0.71
  -8   0   1    0.67    0.81
  -7   0   1    1.42    0.69
   7   0  -1    0.39    0.61
   6   0  -1   -0.10    0.45
  -6   0   1   -0.33    0.42
  -5   0   1   20.90    1.30
  -4   0   1    0.54    0.32
  -3   0   1   91.63    2.42
   3   0  -1   90.85    2.98
   3   0  -1   90.67    2.90
  -3   0   1   88.54    2.95
   3   0  -1   89.35    2.40
  -3   0   1   91.96    2.92
   2   0  -1    0.12    0.14
   2   0  -1    0.04    0.06
  -2   0   1    0.08    0.06
   2   0  -1    0.20    0.15
  -2   0   1   -0.12    0.12
  -2   0   1    0.19    0.15
   1   0  -1   13.26    0.51
  -1   0   1   13.06    0.40
  -1   0   1   13.49    0.51
   1   0  -1   12.72    0.53
   1   0  -1   13.03    0.40
  -1   0   1   13.20    0.53
   1   0   1   35.05    1.11
  -1   0  -1   35.74    1.10
  -1   0  -1   34.29    1.11
  -1   0  -1   33.96    0.91
   1   0   1   34.94    1.10
   1   0   1   33.00    0.91
   2   0   1    0.01    0.15
  -2   0  -1    0.16    0.15
   2   0   1   -0.04    0.12
  -2   0  -1    0.09    0.12
   2   0   1    0.05    0.04
   2   0   1    0.05    0.03
   3   0   1    0.01    0.19
  -3   0  -1    0.24    0.20
  -3   0  -1   -0.26    0.25
   3   0   1    0.30    0.26
   4   0   1    0.02    0.32
  -4   0  -1   -0.07    0.28
   5   0   1   12.53    1.22
  -6   0  -1    0.02    0.46
   6   0   1    0.21    0.51
   7   0   1    5.56    1.02
  -7   0  -1    6.22    1.13
  -8   0  -1   -0.61    0.87
   8   0   1   -0.72    0.80
   9   0   1    0.98    1.06
  -9   0  -1    2.43    1.12
   9  -1  -1    1.14    1.21
  -9  -1   1    2.08    1.16
  -9   1   1    3.54    1.37
   9   1  -1    3.80    1.26
   8  -1  -1    0.63    0.84
  -8  -1   1    0.44    0.82
   8   1  -1    0.46    0.80
  -8   1   1    1.69    0.95
   7  -1  -1   -0.26    0.56
  -7  -1   1    0.96    0.70
   7   1  -1    0.45    0.61
  -7   1   1   -0.20    0.57
  -6  -1   1    0.03    0.45
   6  -1  -1    0.49    0.45
  -6   1   1   -0.41    0.48
   6   1  -1    0.12    0.46
   5  -1  -1   26.05    0.88
   5  -1  -1   26.95    0.87
  -5   1   1   27.91    1.52
  -4  -1   1    0.00    0.24
   4  -1  -1    0.06    0.12
   4  -1  -1    0.06    0.30
  -4   1   1    0.26    0.29
   4   1  -1   -0.08    0.30
  -3  -1   1   72.94    2.46
   3  -1  -1   70.88    2.48
  -3  -1   1   72.79    1.89
   3  -1  -1   73.16    2.41
   3  -1  -1   70.73    2.03
  -3  -1   1   68.68    2.46
   3   1  -1   68.19    2.40
  -3   1   1   72.25    2.48
   3   1  -1   71.89    1.90
  -3   1   1   71.89    2.06
  -3   1   1   73.19    2.42
   3   1  -1   73.57    2.49
  -2  -1   1  130.03    3.38
   2  -1  -1  131.93    3.79
   2  -1  -1  131.13    3.49
  -2  -1   1  131.31    3.77
  -2  -1   1  129.21    3.74
   2  -1  -1  127.60    3.69
   2   1  -1  131.46    3.78
  -2   1   1  132.38    3.77
   2   1  -1  122.93    3.42
  -2   1   1  130.73    3.50
  -2   1   1  132.70    3.71
   2   1  -1  128.35    3.73
  -1  -1   1  642.23   19.56
   1  -1  -1  663.52   21.04
   1   1  -1  677.94   19.68
  -1   1   1  694.08   21.12
   0  -1   1    0.38    0.07
   0   1  -1    0.04    0.05
   0   1   1    0.24    0.06
   0   1   1    0.28    0.05
   0   1  -1    0.28    0.07
   0   1   1    0.07    0.04
  -1  -1  -1   40.45    1.26
   1  -1   1   40.69    1.16
  -1  -1  -1   40.75    1.27
   1  -1   1   39.28    1.25
  -1  -1  -1   39.40    1.13
   1  -1   1   40.21    1.23
   1  -1   1   38.19    1.15
  -1   1  -1   40.66    1.26
   1   1   1   39.78    1.26
   1   1   1   39.45    1.25
  -1   1  -1   36.67    1.22
   1   1   1   39.81    1.10
   2  -1   1    2.93    0.36
   2  -1   1    2.48    0.19
  -2  -1  -1    2.27    0.33
  -2  -1  -1    2.58    0.40
   2  -1   1    2.47    0.35
   2  -1   1    2.40    0.19
   2   1   1    2.26    0.38
  -2   1  -1    2.01    0.30
   2   1   1    3.11    0.39
  -2   1  -1    1.61    0.28
  -3  -1  -1    2.05    0.42
   3  -1   1    1.39    0.18
   3  -1   1    1.12    0.33
   3  -1   1    1.44    0.19
  -3  -1  -1    1.42    0.40
   3  -1   1    2.06    0.38
  -3   1  -1    0.79    0.30
  -3   1  -1    1.70    0.39
   3   1   1    0.94    0.31
   3   1   1    1.03    0.28
   4  -1   1   21.52    0.72
  -4  -1  -1   20.92    1.23
   4  -1   1   22.29    1.27
   4  -1   1   20.86    0.71
   4   1   1   20.41    1.22
  -4   1  -1   20.83    1.20
  -5  -1  -1   15.07    1.20
   5  -1   1   17.97    0.66
   5   1   1   18.05    1.27
   6  -1   1    2.85    0.79
  -6  -1  -1    1.34    0.59
  -6   1  -1    2.80    0.73
   6   1   1    2.42    0.70
   7  -1   1    0.29    0.65
  -7  -1  -1    0.44    0.65
  -7   1  -1   -0.71    0.68
   7   1   1    0.44    0.70
  -8  -1  -1   -0.14    0.77
   8  -1   1    0.37    0.92
  -8   1  -1   -0.44    0.94
   8   1   1    0.57    0.77
  -9  -1  -1    1.88    1.13
   9  -1   1   -0.31    1.03
  -9   1  -1    1.30    1.12
   9   1   1    0.25    1.08
  -9  -2   1    0.72    1.04
   9  -2  -1    0.92    1.02
   9   2  -1    0.62    1.09
  -9   2   1   -1.64    1.00
   8  -2  -1    0.17    0.88
  -8  -2   1    2.48    1.09
   8   2  -1    3.47    1.10
  -8   2   1    1.27    0.97
  -7  -2   1    8.65    1.27
   7  -2  -1    9.78    1.33
   7   2  -1    8.42    1.23
  -7   2   1    9.79    1.29
   6  -2  -1   10.36    0.55
  -6  -2   1    8.69    1.14
   6  -2  -1    9.28    1.20
   6  -2  -1    9.36    0.54
  -6   2   1   10.13    1.18
   6   2  -1    6.68    1.02
  -5  -2   1    8.24    0.97
   5  -2  -1    6.25    0.48
   5  -2  -1    5.96    0.46
  -5   2   1    7.71    0.93
   5   2  -1    6.10    0.86
   4  -2  -1    1.51    0.44
   4  -2  -1    1.35    0.25
  -4  -2   1    2.15    0.48
   4   2  -1    2.02    0.47
  -4   2   1    1.52    0.41
  -4   2   1    1.53    0.29
   3  -2  -1    3.39    0.32
   3  -2  -1    2.96    0.48
  -3  -2   1    3.04    0.48
  -3  -2   1    3.29    0.21
  -3  -2   1    3.40    0.23
   3  -2  -1    3.06    0.48
  -3  -2   1    3.05    0.46
  -3  -2   1    3.41    0.51
   3   2  -1    2.85    0.45
  -3   2   1    2.96    0.34
  -3   2   1    3.45    0.49
  -3   2   1    4.85    0.56
  -2  -2   1   58.73    1.98
   2  -2  -1   59.80    1.92
   2  -2  -1   60.32    1.82
  -2  -2   1   60.32    1.70
  -2  -2   1   60.69    1.98
   2  -2  -1   58.32    1.99
   2   2  -1   58.93    1.97
  -2   2   1   60.14    1.83
  -2   2   1   57.33    1.92
  -2   2   1   59.53    1.97
   2   2  -1   61.63    1.72
  -1  -2   1    5.62    0.37
   1  -2  -1    5.86    0.34
  -1  -2   1    5.40    0.32
   1  -2  -1    5.29    0.34
   1  -2  -1    5.39    0.34
  -1  -2   1    5.53    0.30
   1   2  -1    5.01    0.30
   1   2  -1    5.83    0.36
  -1   2   1    4.18    0.30
  -1   2   1    6.24    0.35
  -1   2   1    5.48    0.33
   1   2  -1    5.13    0.31
   0  -2  -1    2.07    0.20
   0  -2  -1    2.19    0.18
   0  -2   1    2.18    0.23
   0  -2  -1    2.24    0.18
   0  -2   1    2.25    0.21
   0  -2   1    2.27    0.13
   0   2  -1    2.08    0.20
   0   2   1    2.17    0.18
   0   2  -1    1.76    0.21
   0   2   1    2.07    0.19
   0   2   1    2.32    0.18
   1  -2   1   88.50    2.51
   1  -2   1   86.59    2.51
   1  -2   1   88.42    2.56
  -1  -2  -1   87.19    2.54
  -1  -2  -1   89.94    2.45
  -1  -2  -1   91.33    2.56
   1  -2   1   85.18    2.48
  -1   2  -1   86.73    2.47
   1   2   1   87.98    2.45
   1   2   1   89.06    2.55
   1   2   1   88.94    2.55
  -1   2  -1   88.93    2.56
  -2  -2  -1    8.67    0.57
  -2  -2  -1    9.50    0.39
  -2  -2  -1    9.40    0.59
   2  -2   1    9.06    0.57
   2  -2   1    8.58    0.55
  -2  -2  -1    9.00    0.38
   2  -2   1    7.71    0.44
   2  -2   1    9.02    0.47
  -2   2  -1    8.60    0.56
   2   2   1    9.56    0.60
  -2   2  -1    9.25    0.57
  -3  -2  -1   69.06    2.51
   3  -2   1   73.43    2.19
  -3  -2  -1   75.21    2.57
   3  -2   1   73.61    2.19
  -3  -2  -1   74.00    1.95
   3  -2   1   71.40    2.49
   3  -2   1   76.44    2.55
  -3   2  -1   73.62    2.53
  -3   2  -1   72.61    2.52
   3   2   1   74.29    2.56
   3   2   1   73.04    2.51
   4  -2   1    2.29    0.32
   4  -2   1    2.19    0.28
  -4  -2  -1    1.84    0.46
   4  -2   1    2.32    0.52
   4   2   1    1.52    0.45
  -4   2  -1    1.74    0.44
  -5  -2  -1    3.29    0.67
   5  -2   1    2.95    0.35
   5  -2   1    3.68    0.35
   5   2   1    2.38    0.61
  -5   2  -1    3.60    0.77
  -6  -2  -1    6.85    1.00
   6  -2   1    4.64    0.34
   6  -2   1    4.80    0.37
   6  -2   1    7.00    0.99
  -6   2  -1    5.28    0.87
   6   2   1    4.06    0.82
   7  -2   1    1.03    0.79
  -7  -2  -1    0.65    0.70
   7   2   1    1.87    0.84
  -7   2  -1    0.91    0.74
   8  -2   1    1.24    0.87
  -8  -2  -1    1.41    0.88
   8   2   1    1.94    0.90
  -8   2  -1    0.89    0.94
   9  -2   1    0.83    1.10
  -9  -2  -1    0.18    1.05
   9   2   1    0.27    1.05
  -9   2  -1    0.52    1.25
   9  -3  -1    4.59    1.26
  -9  -3   1    6.63    1.48
   9   3  -1    5.03    1.21
  -9   3   1    5.26    1.50
  -8  -3   1    3.10    1.04
   8  -3  -1    2.91    1.07
  -8   3   1    2.54    1.05
   8   3  -1    4.82    1.11
   7  -3  -1   -0.13    0.37
   7  -3  -1    0.99    0.69
   7  -3  -1   -0.08    0.32
  -7  -3   1    0.06    0.66
   7   3  -1    0.52    0.77
  -7   3   1    0.55    0.64
   6  -3  -1   15.95    1.33
  -6  -3   1   15.64    1.38
   6  -3  -1   15.00    0.81
   6  -3  -1   15.44    0.83
  -6   3   1   12.23    1.20
   6   3  -1   16.05    1.31
   5  -3  -1    0.56    0.33
  -5  -3   1    1.28    0.50
   5  -3  -1    0.62    0.32
   5  -3  -1    0.21    0.50
  -5   3   1    0.51    0.45
   5   3  -1    0.41    0.42
  -4  -3   1   10.48    0.48
   4  -3  -1   11.01    0.67
  -4  -3   1   11.49    0.92
  -4  -3   1   11.08    0.45
   4  -3  -1   10.25    0.87
  -4   3   1   10.68    0.65
   4   3  -1   10.29    0.86
  -4   3   1   10.64    0.84
   3  -3  -1    0.19    0.19
  -3  -3   1   -0.05    0.21
  -3  -3   1    0.11    0.12
   3  -3  -1   -0.06    0.21
  -3  -3   1    0.20    0.16
   3  -3  -1   -0.12    0.24
  -3  -3   1    0.52    0.30
  -3   3   1    0.13    0.20
  -3   3   1   -0.08    0.27
   3   3  -1    0.40    0.26
  -3   3   1   -0.07    0.21
  -2  -3   1    5.75    0.39
  -2  -3   1    6.18    0.39
   2  -3  -1    6.71    0.49
   2  -3  -1    6.25    0.49
   2  -3  -1    5.97    0.45
  -2  -3   1    7.15    0.52
  -2   3   1    5.91    0.49
   2   3  -1    6.36    0.47
   2   3  -1    7.47    0.54
  -2   3   1    5.58    0.54
  -1  -3   1  386.74   10.02
   1  -3  -1  386.25   10.12
  -1  -3   1  385.24   10.06
   1  -3  -1  377.38   10.04
   1  -3  -1  395.18   10.06
  -1  -3   1  377.11   10.12
  -1  -3   1  374.98   10.05
  -1   3   1  379.42   10.04
   1   3  -1  385.59   10.01
   1   3  -1  386.15   10.14
  -1   3   1  391.52   10.14
  -1   3   1  375.69   10.03
   0  -3  -1   68.43    2.11
   0  -3  -1   69.50    2.03
   0  -3   1   69.30    2.09
   0  -3   1   70.23    1.93
   0  -3  -1   70.62    2.05
   0  -3   1   70.25    2.13
   0  -3   1   69.19    1.93
   0  -3   1   67.06    2.11
   0   3   1   70.21    2.12
   0   3  -1   69.55    2.11
   0   3   1   70.61    2.05
  -1  -3  -1  946.21   23.68
  -1  -3  -1  912.18   23.66
   1  -3   1  897.57   23.68
  -1  -3  -1  911.86   23.62
  -1   3  -1  915.72   23.55
   1   3   1  935.03   23.69
  -2  -3  -1    8.57    0.59
   2  -3   1    8.35    0.58
  -2  -3  -1    9.15    0.60
  -2  -3  -1    8.94    0.46
  -2  -3  -1    9.19    0.46
   2  -3   1    8.73    0.57
  -2  -3  -1    8.28    0.58
   2  -3   1    9.12    0.61
   2  -3   1    7.85    0.52
  -2   3  -1    7.41    0.56
   2   3   1    7.56    0.56
  -2   3  -1    8.20    0.56
  -3  -3  -1    8.81    0.70
   3  -3   1    8.29    0.68
   3  -3   1    8.44    0.68
   3  -3   1    8.56    0.55
  -3  -3  -1    7.96    0.71
   3  -3   1    7.81    0.53
  -3  -3  -1    7.88    0.41
  -3  -3  -1    8.02    0.41
   3   3   1    7.51    0.67
  -3   3  -1    7.92    0.67
  -3   3  -1    7.79    0.65
   4  -3   1   17.35    1.11
  -4  -3  -1   14.47    0.50
   4  -3   1   13.04    0.74
   4  -3   1   15.02    0.77
  -4  -3  -1   13.94    1.03
  -4  -3  -1   14.97    0.50
   4   3   1   14.58    1.03
  -4   3  -1   16.28    1.08
   5  -3   1    8.56    0.58
  -5  -3  -1    9.06    1.09
   5  -3   1    7.27    0.59
   5  -3   1    7.04    1.04
   5   3   1    7.74    0.99
  -5   3  -1    9.72    0.95
   6  -3   1    8.90    0.60
   6  -3   1    8.85    1.21
   6  -3   1    8.60    0.65
  -6  -3  -1    8.15    1.11
  -6   3  -1    8.41    1.08
   6   3   1   11.51    1.29
   7  -3   1   23.90    0.87
  -7  -3  -1   21.66    1.76
   7  -3   1   22.28    0.90
   7  -3   1   21.82    1.84
  -7   3  -1   20.86    1.79
   7   3   1   21.96    1.75
  -8  -3  -1    4.86    1.21
   8  -3   1    5.54    1.29
  -8   3  -1    3.72    1.17
   8   3   1    5.64    1.24
   9  -3   1    0.06    1.08
  -9  -3  -1   -0.42    1.16
   9   3   1    0.29    1.06
  -9   3  -1    1.51    1.30
  -9  -4   1   10.18    1.78
   9  -4  -1   11.08    1.94
  -9   4   1    9.66    1.81
   9   4  -1   10.94    1.87
   8  -4  -1    0.38    0.88
  -8  -4   1    1.09    0.90
   8   4  -1    1.03    0.94
  -8   4   1    2.93    1.12
   7  -4  -1    4.83    0.58
  -7  -4   1    5.60    1.21
   7  -4  -1    4.00    1.10
   7  -4  -1    2.78    0.61
  -7   4   1    4.52    1.06
   7   4  -1    3.01    0.97
   6  -4  -1    1.66    0.42
   6  -4  -1    1.64    0.49
   6  -4  -1    0.91    0.57
  -6  -4   1    1.79    0.66
  -6   4   1    1.29    0.58
   6   4  -1    0.99    0.56
   5  -4  -1    2.93    0.50
   5  -4  -1    2.89    0.51
  -5  -4   1    3.82    0.30
   5  -4  -1    4.50    0.86
  -5  -4   1    3.36    0.71
  -5  -4   1    3.71    0.33
   5   4  -1    2.78    0.64
  -5   4   1    4.39    0.90
  -4  -4   1    5.99    0.76
   4  -4  -1    7.10    0.85
  -4  -4   1    6.44    0.41
   4  -4  -1    5.49    0.60
  -4  -4   1    6.70    0.48
  -4   4   1    6.39    0.75
   4   4  -1    6.80    0.79
   3  -4  -1   14.72    0.85
  -3  -4   1   16.54    1.02
  -3  -4   1   16.91    0.77
   3  -4  -1   14.98    0.95
  -3  -4   1   16.59    0.74
  -3  -4   1   15.27    0.98
   3  -4  -1   16.61    1.00
  -3   4   1   15.82    0.97
   3   4  -1   16.42    0.97
  -3   4   1   14.76    0.86
  -3   4   1   17.16    0.98
   2  -4  -1    3.65    0.46
   2  -4  -1    3.21    0.44
  -2  -4   1    2.92    0.36
  -2  -4   1    3.71    0.48
   2  -4  -1    3.51    0.46
  -2  -4   1    3.74    0.44
  -2   4   1    2.77    0.39
   2   4  -1    2.73    0.42
  -2   4   1    3.64    0.43
  -2   4   1    3.76    0.46
   2   4  -1    3.08    0.42
  -1  -4   1   55.09    1.81
   1  -4  -1   55.20    1.76
  -1  -4   1   51.65    1.82
  -1  -4   1   54.22    1.81
   1  -4  -1   54.03    1.78
  -1  -4   1   55.95    1.73
   1  -4  -1   54.79    1.86
  -1   4   1   52.92    1.76
   1   4  -1   52.00    1.84
   1   4  -1   53.84    1.70
  -1   4   1   55.71    1.88
  -1   4   1   55.16    1.74
   0  -4   1   77.07    2.21
   0  -4  -1   79.72    2.32
   0  -4  -1   76.20    2.30
   0  -4   1   75.73    2.45
   0  -4  -1   80.13    2.37
   0  -4   1   78.29    2.41
   0  -4   1   80.23    2.46
   0  -4  -1   77.19    2.44
   0  -4   1   77.66    2.22
   0   4   1   78.17    2.37
   0   4  -1   76.63    2.92
   0   4   1   78.17    2.46
  -1  -4  -1   84.04    2.62
   1  -4   1   86.19    2.68
  -1  -4  -1   87.62    2.61
   1  -4   1   86.11    2.69
  -1  -4  -1   86.21    2.63
   1  -4   1   85.97    2.50
   1  -4   1   83.85    2.64
   1   4   1   87.83    2.60
   1   4   1   88.90    2.64
  -1   4  -1   83.17    2.47
   1   4   1   85.35    2.65
  -1   4  -1   85.53    2.64
   2  -4   1    9.14    0.63
   2  -4   1    7.11    0.56
   2  -4   1    8.78    0.60
  -2  -4  -1    8.47    0.60
  -2  -4  -1    7.31    0.59
  -2  -4  -1    9.38    0.55
   2  -4   1    8.82    0.62
  -2   4  -1    8.46    0.61
  -2   4  -1    7.95    0.56
   2   4   1    7.68    0.58
   3  -4   1   54.78    2.06
   3  -4   1   56.13    1.92
  -3  -4  -1   49.54    2.06
  -3  -4  -1   54.42    1.73
  -3  -4  -1   53.50    1.72
   3  -4   1   55.40    1.92
   3   4   1   54.75    2.08
  -3   4  -1   52.23    1.98
  -3   4  -1   51.55    2.05
   4  -4   1    1.09    0.34
   4  -4   1    1.12    0.41
  -4  -4  -1    0.79    0.23
  -4  -4  -1    1.37    0.24
   4  -4   1    1.59    0.40
  -4  -4  -1    1.01    0.44
   4   4   1    0.61    0.43
  -4   4  -1    0.55    0.35
   5  -4   1    0.07    0.42
   5  -4   1   -0.47    0.36
   5  -4   1   -0.03    0.28
  -5  -4  -1   -0.08    0.42
  -5   4  -1   -0.17    0.48
   5   4   1    0.11    0.43
   6  -4   1    3.52    0.51
   6  -4   1    2.96    0.56
  -6  -4  -1    2.22    0.74
   6  -4   1    4.49    0.92
   6   4   1    3.20    0.86
  -6   4  -1    3.16    0.84
   7  -4   1   -0.36    0.53
   7  -4   1    0.41    0.75
   7  -4   1    1.78    0.43
   7   4   1    0.93    0.82
  -7   4  -1    1.47    0.84
   8  -4   1    9.38    1.61
  -8  -4  -1    6.36    1.29
  -8   4  -1    9.73    1.64
   8   4   1    9.56    1.53
   9  -4   1    3.60    1.42
  -9   4  -1    4.20    1.46
   9   4   1    4.58    1.54
   9  -5  -1    2.72    1.44
  -9  -5   1    2.16    1.37
  -9   5   1    4.56    1.54
   8  -5  -1    1.47    1.13
   8  -5  -1   -0.40    0.57
  -8  -5   1    0.95    0.95
  -8   5   1    0.36    0.91
   8   5  -1    0.18    0.89
  -7  -5   1   -0.32    0.77
   7  -5  -1   -0.07    0.71
   7  -5  -1    0.36    0.52
  -7   5   1    0.01    0.73
   7   5  -1    0.05    0.73
  -6  -5   1   34.31    2.17
   6  -5  -1   39.14    2.25
   6  -5  -1   43.47    1.77
   6   5  -1   38.20    2.21
  -6   5   1   41.43    2.18
  -5  -5   1   18.39    1.39
  -5  -5   1   16.68    0.74
   5  -5  -1   18.19    1.37
   5  -5  -1   19.35    1.10
  -5  -5   1   16.78    0.82
  -5   5   1   19.17    1.35
   5   5  -1   18.98    1.32
  -4  -5   1    0.76    0.33
  -4  -5   1    1.07    0.27
   4  -5  -1    0.83    0.43
   4  -5  -1    0.29    0.30
   4   5  -1    0.58    0.37
  -4   5   1    0.88    0.44
  -3  -5   1   72.31    2.67
  -3  -5   1   71.84    2.49
  -3  -5   1   72.36    2.31
   3  -5  -1   72.31    2.60
  -3   5   1   69.23    2.48
   3   5  -1   72.97    2.56
  -3   5   1   72.73    2.70
  -3   5   1   71.01    2.54
  -2  -5   1   43.22    1.61
  -2  -5   1   45.95    1.69
  -2  -5   1   44.30    1.62
   2  -5  -1   42.95    1.71
   2  -5  -1   46.70    1.70
   2  -5  -1   41.55    1.65
   2   5  -1   42.94    1.63
  -2   5   1   44.93    1.67
   2   5  -1   43.96    1.77
  -2   5   1   44.51    1.74
   1  -5  -1    5.30    0.58
   1  -5  -1    4.95    0.44
  -1  -5   1    6.12    0.51
  -1  -5   1    5.51    0.44
  -1  -5   1    5.55    0.53
  -1  -5   1    6.19    0.52
   1  -5  -1    5.48    0.49
  -1   5   1    5.17    0.43
  -1   5   1    5.42    0.45
  -1   5   1    5.34    0.59
   1   5  -1    5.24    0.50
   1   5  -1    6.45    0.44
   0  -5   1   58.60    2.05
   0  -5   1   61.09    2.16
   0  -5   1   57.12    1.78
   0  -5  -1   57.04    1.94
   0  -5   1   57.50    1.77
   0  -5  -1   60.46    1.88
   0  -5  -1   58.89    2.06
   0  -5   1   60.52    2.08
   0  -5  -1   56.18    1.87
   0   5   1   57.27    2.04
   0   5   1   59.41    1.97
   0   5  -1   57.61    2.01
  -1  -5  -1   43.95    1.61
   1  -5   1   44.27    1.46
  -1  -5  -1   42.35    1.60
   1  -5   1   41.52    1.66
   1  -5   1   43.11    1.68
   1  -5   1   43.23    1.63
  -1  -5  -1   42.68    1.55
   1   5   1   45.56    1.64
  -1   5  -1   43.82    1.42
  -1   5  -1   40.57    1.60
   1   5   1   43.15    1.55
  -2  -5  -1   10.97    0.78
   2  -5   1   12.96    0.81
   2  -5   1   12.85    0.80
  -2  -5  -1   11.68    0.77
  -2  -5  -1   13.02    0.74
   2  -5   1   11.37    0.72
  -2  -5  -1   13.11    0.82
   2  -5   1   11.35    0.82
  -2   5  -1   12.62    0.72
   2   5   1   12.26    0.81
   2   5   1   12.16    0.77
  -2   5  -1   12.13    0.78
   3  -5   1    6.57    0.74
   3  -5   1    5.09    0.61
  -3  -5  -1    6.86    0.83
  -3  -5  -1    6.28    0.55
  -3  -5  -1    5.91    0.49
  -3   5  -1    5.37    0.69
   3   5   1    7.69    0.71
  -3   5  -1    6.20    0.68
  -4  -5  -1    2.13    0.33
  -4  -5  -1    2.66    0.39
   4  -5   1    2.49    0.48
   4  -5   1    1.81    0.51
  -4   5  -1    3.38    0.66
   4   5   1    3.16    0.58
   5  -5   1   13.70    1.21
  -5  -5  -1   12.65    1.16
  -5  -5  -1   12.62    0.59
   5  -5   1   11.98    0.90
  -5  -5  -1   12.79    0.63
   5   5   1   13.70    1.17
  -5   5  -1   13.22    1.16
  -6  -5  -1   14.08    1.56
   6  -5   1   14.37    1.03
   6  -5   1   17.26    1.48
   6   5   1   16.37    1.41
  -6   5  -1   15.89    1.40
   7  -5   1   18.06    1.14
  -7  -5  -1   20.72    1.79
   7  -5   1   21.60    1.88
  -7   5  -1   21.19    1.74
   7   5   1   23.25    3.15
   8  -5   1    9.66    1.57
  -8  -5  -1   11.49    1.65
  -8   5  -1    9.73    1.63
   8   5   1   12.53    1.74
   9  -5   1    2.71    1.40
  -9  -5  -1   -1.39    1.34
   9   5   1    2.06    1.25
  -9   5  -1    0.19    1.22
  -9  -6   1   10.07    1.79
  -9   6   1   12.09    1.93
   9   6  -1    8.70    1.79
   8  -6  -1    2.08    0.79
   8  -6  -1    2.15    1.07
  -8  -6   1    0.66    0.99
  -8   6   1    3.06    1.09
   8   6  -1    2.23    1.14
   7  -6  -1    4.21    0.77
  -7  -6   1    3.58    1.06
   7  -6  -1    3.23    1.06
   7   6  -1    5.25    1.35
  -7   6   1    6.14    1.21
   6  -6  -1    6.14    0.83
  -6  -6   1    6.30    0.56
  -6  -6   1    6.09    0.47
  -6  -6   1    5.60    1.10
   6  -6  -1    4.91    1.02
   6   6  -1    4.22    0.96
  -6   6   1    7.45    1.11
  -5  -6   1   75.54    3.15
   5  -6  -1   76.12    2.78
  -5  -6   1   71.14    2.32
   5  -6  -1   75.03    3.11
  -5   6   1   69.18    2.93
   5   6  -1   78.40    3.09
   4  -6  -1   -0.03    0.41
  -4  -6   1    0.32    0.38
   4  -6  -1    0.03    0.34
  -4  -6   1    0.51    0.28
  -4  -6   1   -0.59    0.40
  -4   6   1   -0.19    0.43
   4   6  -1    0.23    0.38
  -3  -6   1    5.79    0.61
  -3  -6   1    6.13    0.67
   3  -6  -1    5.89    0.73
   3   6  -1    6.74    0.77
   3   6  -1    5.62    0.76
  -3   6   1    6.03    0.74
   2  -6  -1   43.99    1.71
   2  -6  -1   44.58    1.77
  -2  -6   1   42.86    1.68
  -2  -6   1   43.98    1.71
  -2  -6   1   42.48    1.71
   2   6  -1   41.57    1.63
  -2   6   1   44.27    1.81
   2   6  -1   43.19    1.83
  -2   6   1   43.65    1.71
  -2   6   1   41.67    1.62
  -1  -6   1    7.71    0.55
   1  -6  -1    8.06    0.63
  -1  -6   1    8.09    0.64
   1  -6  -1    7.16    0.55
   1   6  -1    6.92    0.62
  -1   6   1    7.58    0.65
  -1   6   1    7.15    0.59
  -1   6   1    6.89    0.54
   0  -6   1   36.53    1.29
   0  -6   1   36.56    1.29
   0  -6  -1   39.40    1.40
   0  -6  -1   37.39    1.39
   0  -6   1   35.79    1.52
   0  -6  -1   38.60    1.49
   0  -6   1   35.46    1.57
   0   6  -1   37.40    1.53
   0   6   1   36.13    1.56
   0   6   1   38.33    1.49
  -1  -6  -1   -0.32    0.25
   1  -6   1    0.44    0.33
  -1  -6  -1    0.19    0.23
  -1  -6  -1    0.08    0.27
  -1  -6  -1    0.21    0.32
   1  -6   1    0.74    0.31
   1  -6   1    0.04    0.18
  -1   6  -1    0.14    0.27
  -1   6  -1    0.27    0.20
   1   6   1    0.36    0.25
   2  -6   1   49.78    1.84
  -2  -6  -1   51.74    1.94
   2  -6   1   53.20    2.03
  -2  -6  -1   49.93    1.90
  -2  -6  -1   50.06    1.90
  -2   6  -1   48.69    1.95
  -2   6  -1   51.32    1.79
   2   6   1   50.57    2.00
   2   6   1   50.94    1.92
  -3  -6  -1    0.10    0.34
   3  -6   1    0.10    0.31
  -3  -6  -1    0.29    0.23
   3  -6   1    0.21    0.32
  -3  -6  -1   -0.18    0.33
  -3   6  -1   -0.09    0.30
   3   6   1   -0.28    0.27
  -3   6  -1   -0.06    0.35
  -4  -6  -1    4.34    0.77
  -4  -6  -1    4.14    0.50
   4  -6   1    4.28    0.74
  -4  -6  -1    4.48    0.57
   4  -6   1    3.63    0.60
   4   6   1    3.81    0.68
  -4   6  -1    3.49    0.76
  -5  -6  -1    0.14    0.36
  -5  -6  -1    0.17    0.51
   5  -6   1   -0.28    0.39
   5  -6   1    0.72    0.52
  -5  -6  -1   -0.23    0.27
  -5   6  -1   -0.29    0.47
   5   6   1    0.10    0.50
   6  -6   1    1.95    0.56
  -6  -6  -1    2.45    0.28
  -6  -6  -1    1.83    0.30
  -6  -6  -1    3.54    0.95
   6  -6   1    2.88    0.86
   6   6   1    2.40    0.80
  -6   6  -1    2.21    0.80
  -7  -6  -1    1.47    0.91
   7  -6   1   -0.18    0.55
   7  -6   1    0.04    0.85
   7   6   1    1.83    0.81
  -7   6  -1    0.05    0.89
   8  -6   1   14.26    1.92
  -8  -6  -1   10.99    1.76
   8  -6   1   11.80    1.10
   8   6   1   11.00    1.72
  -8   6  -1   10.57    1.65
  -9  -6  -1   -1.25    1.40
   9   6   1   -0.27    1.22
  -9   6  -1    0.44    1.62
  -9  -7   1   -0.77    1.48
   9  -7  -1    0.11    1.35
  -9   7   1   -0.24    1.72
   9   7  -1   -1.69    1.50
   8  -7  -1    1.87    0.89
  -8  -7   1    1.24    1.12
   8  -7  -1    1.76    1.22
  -8   7   1    0.96    1.20
   8   7  -1    1.79    1.20
   7  -7  -1    0.24    0.68
  -7  -7   1    0.09    0.95
  -7   7   1   -0.93    1.37
   7   7  -1   -0.13    0.82
   6  -7  -1    5.89    1.04
  -6  -7   1    4.08    0.50
  -6  -7   1    6.39    1.13
   6  -7  -1    5.38    0.88
   6   7  -1    3.08    0.98
  -6   7   1    3.25    0.96
   5  -7  -1   23.55    1.45
  -5  -7   1   22.67    1.39
   5  -7  -1   25.89    1.69
  -5  -7   1   19.38    1.58
  -5  -7   1   23.56    1.14
   5   7  -1   24.83    1.62
  -5   7   1   26.30    1.65
  -4  -7   1   36.09    1.54
   4  -7  -1   33.04    1.79
  -4  -7   1   35.94    1.93
   4   7  -1   38.00    1.81
  -3  -7   1    6.16    0.71
   3  -7  -1    4.89    0.70
   3  -7  -1    6.41    0.78
  -3   7   1    4.85    0.65
   3   7  -1    6.81    0.80
  -2  -7   1   21.47    1.15
  -2  -7   1   18.32    1.05
   2  -7  -1   18.27    1.04
   2   7  -1   20.82    1.21
  -2   7   1   18.72    1.01
   2   7  -1   20.81    1.06
  -2   7   1   19.96    1.12
  -1  -7   1    1.38    0.34
   1  -7  -1    1.23    0.30
  -1  -7   1    2.09    0.47
  -1  -7   1    1.48    0.32
  -1   7   1    1.04    0.37
  -1   7   1    1.70    0.40
   1   7  -1    0.58    0.33
   0  -7   1    5.47    0.70
   0  -7  -1    5.60    0.50
   0  -7   1    5.02    0.46
   0  -7  -1    6.61    0.80
   0  -7  -1    4.92    0.56
   0  -7   1    3.68    0.57
   0   7   1    4.28    0.57
   0   7  -1    5.92    0.70
  -1  -7  -1   13.31    0.91
  -1  -7  -1   13.92    0.82
   1  -7   1   13.26    0.74
  -1  -7  -1   12.96    0.84
   1  -7   1   13.31    0.96
   1   7   1   14.67    0.94
  -1   7  -1   12.84    0.87
  -1   7  -1   12.98    0.72
   2  -7   1    3.95    0.54
  -2  -7  -1    3.76    0.58
   2  -7   1    4.31    0.64
  -2   7  -1    5.14    0.70
   2   7   1    4.22    0.58
  -2   7  -1    4.72    0.55
   2   7   1    4.95    0.70
  -3  -7  -1   15.64    0.99
   3  -7   1   18.46    1.16
   3  -7   1   18.51    1.11
  -3  -7  -1   18.82    1.29
   3   7   1   18.52    1.16
  -3   7  -1   19.19    1.19
   4  -7   1    1.27    0.57
  -4  -7  -1    1.30    0.41
   4  -7   1    1.76    0.55
  -4  -7  -1    1.66    0.55
   4   7   1    0.79    0.50
  -4   7  -1    1.94    0.56
  -5  -7  -1    1.72    0.54
  -5  -7  -1    0.86    0.65
   5  -7   1    1.09    0.61
  -5  -7  -1    2.02    0.44
   5  -7   1    1.47    0.56
  -5   7  -1    1.88    0.69
   5   7   1    2.25    0.75
  -6  -7  -1    5.09    1.16
  -6  -7  -1    4.29    0.47
   6  -7   1    4.27    0.94
  -6  -7  -1    4.01    0.54
   6  -7   1    2.75    0.71
   6   7   1    2.32    0.86
  -6   7  -1    2.70    0.80
   7  -7   1    1.90    0.71
   7  -7   1    0.32    0.90
  -7  -7  -1    1.65    0.89
   7   7   1    0.47    0.87
  -7   7  -1    1.00    0.86
   8  -7   1    3.26    0.98
   8  -7   1    3.06    1.33
  -8  -7  -1    1.69    1.21
  -8   7  -1    0.31    1.20
   8   7   1    1.54    1.24
  -8  -8   1    6.55    2.76
   8  -8  -1    5.55    1.54
   8  -8  -1    4.83    1.16
   8   8  -1    5.33    1.38
  -8   8   1    6.74    1.52
   7  -8  -1    1.04    0.79
  -7  -8   1    2.81    1.09
   7  -8  -1    2.30    1.06
  -7   8   1    2.56    1.03
   7   8  -1   -0.24    0.96
   6  -8  -1    3.82    1.01
  -6  -8   1    2.95    0.93
   6  -8  -1    1.61    0.74
  -6  -8   1    3.99    0.58
   6   8  -1    0.27    0.71
  -6   8   1    2.11    0.75
  -5  -8   1    0.06    0.62
  -5  -8   1    0.35    0.43
   5  -8  -1    0.96    0.64
   5  -8  -1   -0.05    0.47
   5   8  -1    0.68    0.56
  -5   8   1    0.70    0.55
   4  -8  -1   15.40    1.23
  -4  -8   1   15.44    1.04
  -4  -8   1   15.55    1.30
   4  -8  -1   15.73    1.20
   4   8  -1   13.24    1.16
  -4   8   1   15.84    1.25
   3  -8  -1    5.93    0.79
  -3  -8   1    5.14    0.69
   3  -8  -1    5.14    0.79
   3   8  -1    4.90    0.81
   3   8  -1    5.06    0.72
  -3   8   1    5.34    0.76
  -2  -8   1   10.60    0.87
  -2  -8   1    9.35    0.85
   2  -8  -1   10.19    0.94
   2  -8  -1   10.06    0.80
   2   8  -1   11.71    0.94
  -2   8   1    8.57    0.92
   2   8  -1    8.45    0.72
  -2   8   1   11.32    0.87
  -1  -8   1   21.83    1.09
  -1  -8   1   23.56    1.07
   1  -8  -1   21.55    1.10
  -1  -8   1   21.25    1.27
  -1   8   1   20.86    1.10
   1   8  -1   22.50    1.29
  -1   8   1   22.75    1.24
   0  -8   1    8.68    0.61
   0  -8  -1    8.43    0.64
   0  -8  -1    8.46    0.95
   0  -8   1    8.40    0.63
   0  -8  -1    9.78    0.72
   0  -8   1    8.73    0.81
   0   8  -1    8.86    0.83
   0   8   1    9.41    0.75
  -1  -8  -1    7.23    0.71
  -1  -8  -1    7.22    0.64
  -1  -8  -1    6.26    0.77
   1  -8   1    5.74    0.55
   1   8   1    7.80    0.72
  -1   8  -1    6.66    0.58
  -1   8  -1    6.27    0.77
  -2  -8  -1   19.01    1.14
   2  -8   1   18.02    1.02
   2  -8   1   18.48    1.21
  -2   8  -1   16.01    1.13
   2   8   1   14.84    1.15
  -2   8  -1   16.50    0.96
   3  -8   1    0.10    0.43
  -3  -8  -1    1.48    0.46
   3  -8   1    1.08    0.47
   3   8   1    0.65    0.43
  -3   8  -1    0.44    0.48
   4  -8   1    9.69    1.06
  -4  -8  -1    8.07    0.86
  -4  -8  -1    7.42    1.07
   4  -8   1    6.91    0.90
  -4   8  -1    9.17    1.07
   4   8   1    8.14    0.98
   5  -8   1    1.54    0.63
  -5  -8  -1    1.99    0.70
  -5  -8  -1    1.72    0.48
   5  -8   1    1.79    0.71
   5   8   1    2.40    0.73
  -5   8  -1    3.22    0.85
   6  -8   1    0.39    0.73
  -6  -8  -1    1.48    0.46
   6  -8   1    1.01    0.62
  -6  -8  -1    1.63    0.88
  -6   8  -1    0.18    0.73
   6   8   1    0.21    0.79
  -7  -8  -1    0.45    1.06
   7  -8   1    0.18    0.98
   7  -8   1    0.75    0.82
   7   8   1    0.09    0.86
  -7   8  -1    0.07    0.98
   8  -8   1    2.21    1.05
   8  -8   1    1.11    1.19
   8   8   1    2.99    1.38
  -8   8  -1    0.76    1.31
  -8  -9   1   -1.84    1.29
   8  -9  -1   -0.73    1.31
   8  -9  -1   -0.74    1.15
   8   9  -1    0.89    1.18
  -8   9   1    0.02    1.33
   7  -9  -1   -0.94    0.83
  -7  -9   1   -0.47    1.15
   7  -9  -1    0.95    0.98
   7   9  -1    1.24    1.05
  -7   9   1   -0.61    1.05
   6  -9  -1   -0.04    0.73
  -6  -9   1    0.66    0.87
   6  -9  -1    1.87    0.97
  -6  -9   1    0.29    0.52
  -6   9   1   -1.13    0.79
   6   9  -1   -0.30    0.80
  -5  -9   1    7.89    0.89
   5  -9  -1    9.05    1.23
  -5  -9   1    8.25    1.33
   5  -9  -1    4.18    0.95
   5   9  -1    7.14    1.04
  -5   9   1    7.85    1.18
  -4  -9   1    3.96    0.90
  -4  -9   1    5.07    0.79
   4  -9  -1    2.21    0.73
   4  -9  -1    3.84    0.80
  -4   9   1    4.17    0.85
   4   9  -1    3.99    0.78
   3  -9  -1    0.17    0.47
   3  -9  -1   -0.58    0.44
  -3  -9   1    0.29    0.49
   3   9  -1    0.54    0.47
   3   9  -1   -0.13    0.51
  -3   9   1   -0.02    0.46
  -2  -9   1   21.14    1.36
   2  -9  -1   23.34    1.26
  -2  -9   1   23.20    1.25
   2  -9  -1   20.81    1.43
  -2   9   1   25.15    1.36
   2   9  -1   23.85    1.51
  -1  -9   1   11.16    0.77
   1  -9  -1   11.69    1.09
   1  -9  -1   10.30    0.81
   1  -9  -1   12.16    0.89
  -1  -9   1   11.52    0.99
  -1  -9   1    9.75    0.85
  -1   9   1   11.76    0.97
   0  -9  -1    0.27    0.41
   0  -9  -1   -0.29    0.28
   0  -9   1    0.15    0.39
   0  -9  -1   -0.58    0.38
   0  -9   1    0.12    0.30
   0  -9   1    0.29    0.41
   0   9   1   -0.53    0.31
   0   9  -1   -0.21    0.34
   1  -9   1    6.97    0.88
  -1  -9  -1    5.33    0.66
   1  -9   1    4.92    0.60
   1  -9   1    5.61    0.62
  -1  -9  -1    5.59    0.80
  -1   9  -1    4.90    0.77
   1   9   1    5.12    0.75
  -2  -9  -1    4.20    0.66
   2  -9   1    3.92    0.58
   2  -9   1    2.86    0.65
  -2  -9  -1    4.07    0.70
  -2   9  -1    4.72    0.70
  -2   9  -1    3.02    0.57
   2   9   1    4.58    0.79
  -3  -9  -1   10.49    1.07
   3  -9   1    8.48    0.94
   3  -9   1    8.16    1.00
   3   9   1    7.05    0.95
  -3   9  -1    8.73    1.07
   3   9   1    6.99    0.90
  -4  -9  -1    1.25    0.78
   4  -9   1    1.87    0.66
   4  -9   1    1.44    0.65
   4   9   1    1.77    0.56
  -4   9  -1    1.99    0.73
   5  -9   1    1.37    0.73
  -5  -9  -1    1.36    0.85
  -5  -9  -1    0.92    0.55
   5  -9   1    1.07    0.68
  -5   9  -1    0.83    0.76
   5   9   1    1.38    0.67
   6  -9   1   21.44    1.67
  -6  -9  -1   22.62    1.95
   6  -9   1   21.17    1.77
  -6  -9  -1   20.10    1.24
   6   9   1   21.26    1.88
  -7  -9  -1    1.86    1.16
   7  -9   1    1.60    1.07
   7  -9   1   -0.22    0.89
   7   9   1    1.92    1.07
  -7   9  -1   -0.24    1.04
   8  -9   1   -1.69    1.30
   8  -9   1   -0.34    1.16
  -8  -9  -1    0.34    1.35
  -8   9  -1    0.42    1.22
   8   9   1   -0.76    1.37
  -7 -10   1    0.78    1.35
   7 -10  -1   -0.69    1.15
   7 -10  -1   -2.25    0.99
  -7  10   1   -1.54    0.98
   7  10  -1   -0.34    1.09
   6 -10  -1   -0.05    0.87
  -6 -10   1   -0.29    0.64
  -6 -10   1    0.74    0.97
   6 -10  -1    0.43    0.93
   6  10  -1    0.99    1.01
  -6  10   1   -0.23    0.79
  -5 -10   1    4.94    0.84
  -5 -10   1    4.86    1.13
   5 -10  -1    3.48    0.93
   5 -10  -1    6.52    1.10
   5  10  -1    5.15    1.06
  -5  10   1    4.12    0.96
   4 -10  -1   14.18    1.28
   4 -10  -1   13.59    1.30
  -4 -10   1   15.53    1.25
  -4 -10   1   11.74    1.49
  -4  10   1   13.50    1.31
   4  10  -1   15.36    1.28
  -3 -10   1    0.39    0.55
   3 -10  -1    0.05    0.58
   3 -10  -1   -0.13    0.51
   3  10  -1    0.46    0.53
  -3  10   1    0.77    0.59
  -2 -10   1   -0.13    0.45
   2 -10  -1   -0.22    0.44
   2 -10  -1   -0.54    0.47
  -2 -10   1    0.57    0.49
  -2  10   1   -0.22    0.47
   2  10  -1    0.03    0.53
  -1 -10   1    2.23    0.49
  -1 -10   1    1.53    0.55
  -1 -10   1    0.75    0.53
   1 -10  -1    1.01    0.53
   1 -10  -1    1.90    0.50
   1  10  -1    1.04    0.54
  -1  10   1    1.50    0.49
   0 -10  -1    8.02    0.78
   0 -10  -1    7.95    1.03
   0 -10   1   10.10    1.12
   0 -10   1    8.42    0.81
   0 -10   1    8.70    0.73
   0  10  -1    9.76    1.11
   0  10   1    8.21    0.99
   1 -10   1   12.29    1.13
   1 -10   1   10.32    0.90
   1 -10   1   15.38    0.93
  -1 -10  -1   12.72    1.14
  -1 -10  -1   11.87    0.93
  -1  10  -1   13.46    1.15
   1  10   1   13.28    1.14
   2 -10   1    0.65    0.41
  -2 -10  -1    0.42    0.50
   2 -10   1   -0.06    0.51
  -2 -10  -1    0.87    0.56
  -2  10  -1    0.34    0.45
   2  10   1    0.70    0.54
   3 -10   1    1.44    0.56
   3 -10   1    0.42    0.54
  -3 -10  -1   -0.28    0.49
  -3  10  -1    1.07    0.63
   3  10   1    0.63    0.60
  -4 -10  -1    3.10    0.76
  -4 -10  -1    2.58    0.81
   4 -10   1    2.77    0.87
   4 -10   1    1.78    0.68
  -4  10  -1    1.40    0.72
   4  10   1    1.86    0.66
  -5 -10  -1    7.62    1.29
   5 -10   1    8.73    1.20
   5 -10   1    7.64    1.16
  -5 -10  -1    7.73    1.00
  -5  10  -1    5.45    1.15
   5  10   1    7.26    1.10
  -6 -10  -1    2.16    0.82
   6 -10   1    1.35    0.96
  -6 -10  -1    1.14    1.02
   6 -10   1    2.87    0.95
   6  10   1    2.14    0.88
  -6  10  -1    1.24    0.95
  -7 -10  -1    5.19    1.54
   7 -10   1    2.64    1.11
   7 -10   1    4.44    1.38
  -7  10  -1    2.71    1.27
   7  10   1    1.64    1.23
  -7 -11   1    0.38    1.29
   7 -11  -1    1.27    1.26
   7 -11  -1    3.32    1.34
  -7  11   1    0.82    1.25
   7  11  -1   -0.32    1.23
  -6 -11   1    3.28    1.21
  -6 -11   1    5.05    0.90
   6 -11  -1    3.74    1.18
   6 -11  -1    5.70    1.35
   6  11  -1    5.74    1.29
  -6  11   1    4.21    1.25
  -5 -11   1    0.25    0.96
  -5 -11   1    1.61    0.75
   5 -11  -1    3.57    0.89
   5 -11  -1    0.52    0.90
   5  11  -1    2.47    0.92
  -5  11   1    1.81    0.98
  -4 -11   1    0.22    0.70
   4 -11  -1   -0.27    0.70
   4 -11  -1   -0.51    0.74
   4  11  -1    0.75    0.69
  -4  11   1   -0.29    0.66
  -3 -11   1    2.70    0.87
   3 -11  -1    3.49    0.80
  -3 -11   1    1.56    0.70
   3 -11  -1    1.78    0.68
  -3  11   1    2.72    0.76
   3  11  -1    1.74    0.80
   2 -11  -1   -0.63    0.48
  -2 -11   1    0.22    0.51
   2 -11  -1    0.78    0.69
  -2 -11   1   -0.76    0.59
   2  11  -1    0.51    0.65
  -2  11   1    0.57    0.61
   1 -11  -1    1.53    0.53
   1 -11  -1    2.83    0.81
  -1 -11   1    1.67    0.54
  -1 -11   1    1.93    0.64
  -1  11   1    2.29    0.72
   1  11  -1    1.35    0.60
   0 -11   1    1.65    0.72
   0 -11  -1    2.50    0.58
   0 -11   1    2.15    0.61
   0 -11   1    2.43    0.52
   0 -11  -1    2.49    0.68
   0  11  -1    2.47    0.72
   0  11   1    0.74    0.62
   1 -11   1    2.01    0.50
   1 -11   1    3.00    0.86
  -1 -11  -1    2.21    0.71
   1 -11   1    3.41    0.62
  -1 -11  -1    2.73    0.63
  -1  11  -1    2.07    0.64
   1  11   1    1.26    0.70
   2 -11   1   -0.62    0.61
  -2 -11  -1    0.59    0.56
  -2 -11  -1    0.89    0.56
   2 -11   1    1.27    0.54
  -2  11  -1    0.71    0.54
   2  11   1    1.12    0.72
   3 -11   1    1.86    0.71
  -3 -11  -1    0.82    0.66
  -3 -11  -1    2.90    0.75
   3 -11   1    1.55    0.64
   3  11   1    1.82    0.69
  -3  11  -1    2.43    0.76
  -4 -11  -1   -0.30    0.74
   4 -11   1    0.56    0.74
  -4 -11  -1   -0.19    0.66
   4 -11   1    0.50    0.72
   4  11   1    1.37    0.73
  -4  11  -1   -0.84    0.72
   5 -11   1    0.79    0.89
  -5 -11  -1   -0.12    0.71
   5 -11   1    1.69    0.76
  -5 -11  -1    0.18    0.91
   5  11   1    0.71    0.84
  -5  11  -1    1.33    1.10
   6 -11   1    1.17    1.02
  -6 -11  -1   -1.53    1.15
  -6 -11  -1    1.45    0.84
   6 -11   1    0.16    1.08
   6  11   1   -0.01    1.05
  -6  11  -1   -1.56    1.03
  -7 -11  -1    1.06    1.35
   7 -11   1    1.52    1.31
   7 -11   1   -1.29    1.13
  -7  11  -1   -2.70    1.24
   7  11   1    0.19    1.28
   6 -12  -1    0.19    1.00
  -6 -12   1    2.68    1.20
   6 -12  -1   -0.44    1.22
  -6 -12   1   -0.14    0.96
   6  12  -1    0.98    1.15
  -6  12   1   -1.52    1.10
  -5 -12   1    2.62    1.21
  -5 -12   1    0.91    0.85
   5 -12  -1   -0.05    0.96
   5 -12  -1    1.07    0.98
   5  12  -1    0.29    0.92
  -5  12   1    2.94    1.11
  -4 -12   1   -0.41    0.80
  -4 -12   1    0.53    0.76
  -4 -12   1    0.42    0.92
   4 -12  -1   -0.65    0.82
   4 -12  -1   -2.19    0.85
  -4  12   1   -0.98    0.78
  -3 -12   1    1.20    0.71
   3 -12  -1    1.76    0.77
   3 -12  -1    3.07    0.85
  -3 -12   1    2.46    0.79
  -3  12   1    4.48    0.98
   3  12  -1    2.33    0.89
  -2 -12   1    1.08    0.64
  -2 -12   1    0.43    0.60
   2 -12  -1    0.36    0.60
   2 -12  -1    0.53    0.74
   2  12  -1    0.67    0.80
  -2  12   1   -0.15    0.65
   1 -12  -1    2.29    0.79
  -1 -12   1    0.47    0.53
   1 -12  -1    2.32    0.64
  -1 -12   1   -0.38    0.66
   1  12  -1    1.57    0.68
  -1  12   1    0.60    0.63
   0 -12  -1   12.17    1.08
   0 -12  -1   13.38    1.54
   0 -12   1   13.55    1.50
   0 -12   1   12.54    1.01
   0  12  -1   13.76    1.33
   0  12   1   11.39    1.30
   1 -12   1    7.25    0.82
  -1 -12  -1    4.40    0.94
   1 -12   1    6.12    1.22
  -1 -12  -1    6.54    0.88
   1  12   1    6.63    1.12
  -1  12  -1    6.74    1.06
   2 -12   1    1.33    0.61
  -2 -12  -1    2.11    0.74
   2 -12   1    1.03    0.73
  -2 -12  -1    1.95    0.75
  -2  12  -1    2.11    0.82
   2  12   1    1.25    0.73
  -3 -12  -1    0.21    0.71
  -3 -12  -1   -0.31    0.70
   3 -12   1   -0.19    0.79
   3 -12   1   -0.36    0.68
   3  12   1    1.89    0.86
  -3  12  -1    0.52    0.79
  -4 -12  -1   13.44    1.71
  -4 -12  -1   11.21    1.40
  -4 -12  -1   13.54    1.49
   4 -12   1   12.35    1.40
   4 -12   1    9.71    1.41
  -4  12  -1   14.89    1.81
   5 -12   1    0.91    1.02
   5 -12   1    0.58    0.98
  -5 -12  -1    2.75    1.19
  -5 -12  -1    2.31    0.92
   5  12   1    1.39    1.01
  -5  12  -1    0.08    1.06
   6 -12   1   10.11    1.62
  -6 -12  -1    9.14    1.83
   6 -12   1    8.58    1.59
  -6 -12  -1   10.02    1.33
   6  12   1    6.01    1.45
  -6  12  -1    6.94    1.58
  -6 -13   1    2.84    1.43
   6 -13  -1   -0.89    1.07
   6 -13  -1   -0.93    1.43
  -6  13   1   -0.23    1.34
  -5 -13   1    0.55    0.98
   5 -13  -1    0.01    1.17
   5 -13  -1    0.84    1.01
  -5 -13   1    0.77    1.32
  -5  13   1   -0.95    1.08
  -4 -13   1    1.69    1.20
   4 -13  -1    0.64    1.03
   4 -13  -1    0.94    1.09
  -4 -13   1    1.80    0.99
  -4 -13   1    0.62    0.96
  -4  13   1    1.10    1.05
   3 -13  -1    0.65    0.85
  -3 -13   1   -0.13    0.84
   3 -13  -1    0.49    0.93
  -3 -13   1    0.07    0.80
   3  13  -1   -0.32    0.99
  -3  13   1    1.58    0.87
   2 -13  -1    1.07    0.85
  -2 -13   1    0.66    0.78
   2 -13  -1    1.16    0.84
  -2 -13   1    2.63    0.69
  -2  13   1    2.00    0.84
   2  13  -1    2.02    1.34
   1 -13  -1    0.42    0.76
  -1 -13   1    0.55    0.61
  -1 -13   1   -0.09    0.69
   1 -13  -1    1.07    0.66
   1  13  -1    1.31    0.88
  -1  13   1    1.24    0.73
   0 -13  -1    0.11    0.75
   0 -13  -1    0.52    0.65
   0 -13   1    1.98    0.61
   0 -13   1    0.79    0.80
   0  13   1    2.12    0.77
   0  13  -1    0.80    0.79
   1 -13   1    0.73    0.61
   1 -13   1   -0.19    0.70
  -1 -13  -1    0.56    0.72
  -1  13  -1    0.70    0.83
   1  13   1    1.27    0.80
  -2 -13  -1    1.19    0.80
  -2 -13  -1    0.74    0.72
   2 -13   1   -0.56    0.72
   2 -13   1   -0.52    0.66
  -2  13  -1    0.29    0.83
   2  13   1    0.16    0.80
  -3 -13  -1    8.98    1.28
   3 -13   1    6.73    1.26
   3 -13   1    8.03    1.09
  -3 -13  -1    4.92    1.04
   3  13   1    5.81    1.24
  -4 -13  -1    1.23    1.01
   4 -13   1    1.23    0.98
   4 -13   1   -0.69    0.88
  -4 -13  -1    1.14    1.14
  -4 -13  -1    0.39    0.92
  -4  13  -1   -0.29    1.00
  -5 -13  -1    1.35    1.06
  -5 -13  -1    1.60    1.24
  -5 -13  -1    1.84    1.40
   5 -13   1    1.82    1.18
   5 -13   1    1.48    1.18
  -5  13  -1    2.66    1.21
   5 -14  -1    1.60    1.39
  -5 -14   1    0.70    1.33
  -5 -14   1    2.36    1.20
  -5 -14   1   -0.19    1.50
  -5  14   1   -0.21    1.29
  -4 -14   1    3.76    1.17
   4 -14  -1    0.87    1.20
  -4 -14   1    0.09    1.27
  -4 -14   1    0.58    1.07
  -4  14   1    1.13    1.26
   3 -14  -1    3.21    1.07
  -3 -14   1    7.07    1.30
  -3 -14   1    3.64    1.03
   3 -14  -1    5.98    1.43
   3  14  -1    3.65    1.35
  -3  14   1    3.40    1.14
   2 -14  -1    0.79    0.97
  -2 -14   1    0.64    0.91
   2 -14  -1    0.51    0.88
  -2 -14   1   -1.37    0.93
   2  14  -1   -0.64    1.04
  -1 -14   1    6.09    0.94
   1 -14  -1    7.66    1.15
  -1 -14   1    7.76    1.43
   1 -14  -1    8.33    1.28
  -1  14   1    7.74    1.27
   1  14  -1    6.99    1.32
   0 -14   1    0.20    0.80
   0 -14   1   -0.22    0.67
   0 -14  -1    0.04    0.83
   0  14   1    0.87    1.00
   0  14  -1   -1.42    0.75
   1 -14   1   -0.05    0.95
  -1 -14  -1    0.61    0.76
  -1 -14  -1    0.45    0.97
   1 -14   1   -0.05    0.76
   1  14   1    0.77    0.98
  -1  14  -1    2.69    1.04
   2 -14   1    4.07    1.15
  -2 -14  -1    2.88    0.94
  -2 -14  -1    2.49    1.12
   2  14   1    2.95    1.19
  -2  14  -1    2.29    1.09
   3 -14   1    2.72    1.06
  -3 -14  -1   -0.13    1.05
  -3 -14  -1    0.39    1.02
  -3  14  -1    0.87    1.10
  -4 -14  -1    1.08    1.33
  -4 -14  -1    1.22    1.19
   4 -14   1   -1.08    1.15
  -4 -14  -1    0.16    1.08
  -4  14  -1    0.34    1.15
   5 -14   1    1.26    1.23
  -5 -14  -1   -0.15    1.20
  -5 -14  -1    1.32    1.48
  -5 -14  -1   -0.65    1.34
  -5  14  -1   -1.21    1.25
   3 -15  -1   -1.94    1.18
  -3 -15   1    2.80    1.20
  -3  15   1    0.00    1.26
   3  15  -1    1.12    1.21
  -2 -15   1    0.05    1.03
  -2  15   1    1.67    1.17
   2  15  -1    0.80    1.20
   1 -15  -1   -0.38    1.13
  -1 -15   1    1.55    1.01
   1  15  -1   -0.97    1.13
  -1  15   1    0.80    1.08
   0 -15   1    5.11    1.26
   0 -15  -1    3.98    1.26
   0  15   1    4.45    1.26
   0  15  -1    4.60    1.27
   1 -15   1   -0.70    1.08
  -1 -15  -1    1.86    1.18
   1  15   1   -0.46    1.08
  -1  15  -1   -1.30    1.05
  -2 -15  -1   15.84    1.95
   2  15   1   14.88    1.92
  -2  15  -1   12.94    1.80
   3 -15   1    2.22    1.34
  -3 -15  -1    1.65    1.21
  -3  15  -1   -0.23    1.20
   1 -16  -1    6.06    1.42
  -1 -16   1    9.13    1.53
   1  16  -1    7.25    1.60
  -1  16   1    7.32    1.58
   0 -16   1    2.58    1.29
   0 -16  -1    3.12    1.35
   0  16   1    5.26    1.51
   0  16  -1    1.37    1.42
  -1 -16  -1   -1.43    1.14
   1 -16   1    2.28    1.38
  -1  16  -1    1.13    1.36
   1  16   1    2.30    1.42
 -10   0   2   -0.98    1.47
  10   0  -2    1.05    1.54
   9   0  -2    0.70    1.09
  -9   0   2   -0.45    1.08
  -8   0   2    0.65    0.86
   8   0  -2    2.59    0.86
  -7   0   2    0.30    0.63
   7   0  -2   -0.43    0.56
  -6   0   2    4.06    0.79
   6   0  -2    5.09    0.95
  -5   0   2    0.48    0.37
  -4   0   2   77.38    2.80
   4   0  -2   80.46    2.92
  -4   0   2   81.58    2.21
   4   0  -2   79.25    2.16
  -3   0   2    0.59    0.30
   3   0  -2    0.22    0.22
   2   0  -2   14.45    0.49
  -2   0   2   13.36    0.70
   2   0  -2   13.60    0.66
  -2   0   2   14.68    0.69
  -2   0   2   14.71    0.50
   2   0  -2   12.54    0.70
   1   0  -2    0.14    0.07
  -1   0   2    0.04    0.07
  -1   0   2    0.22    0.08
   1   0  -2    0.39    0.08
   1   0  -2    0.05    0.08
  -1   0   2    0.36    0.07
   0   0   2   -0.01    0.02
  -1   0  -2    0.56    0.13
  -1   0  -2    0.12    0.09
   1   0   2    0.33    0.11
   1   0   2    0.63    0.14
   2   0   2   62.08    2.02
   2   0   2   66.51    2.08
  -2   0  -2   61.20    1.66
  -2   0  -2   60.48    2.03
   2   0   2   62.06    1.65
  -3   0  -2    0.00    0.20
   3   0   2    0.03    0.20
   3   0   2    0.15    0.26
  -3   0  -2    0.11    0.31
   4   0   2    1.37    0.40
  -4   0  -2    2.34    0.50
  -5   0  -2    0.26    0.40
   5   0   2    0.03    0.34
  -6   0  -2    0.31    0.51
   6   0   2    0.39    0.48
  -7   0  -2    0.73    0.67
   7   0   2    0.77    0.67
  -8   0  -2    0.60    0.82
   8   0   2    0.37    0.88
   9   0   2   -0.63    1.07
  -9   0  -2   -0.74    0.99
   9  -1  -2    0.04    1.14
  -9  -1   2    0.62    1.18
  -9   1   2    2.38    1.09
   9   1  -2    0.39    1.01
   8  -1  -2    3.01    0.96
  -8  -1   2    2.69    1.05
   8   1  -2    2.55    0.93
  -8   1   2    1.81    0.98
   7  -1  -2    8.06    1.25
  -7  -1   2   10.52    1.42
  -7   1   2   10.98    1.33
   7   1  -2    9.43    1.33
  -6  -1   2   23.53    1.54
   6  -1  -2   19.72    1.50
   6   1  -2   19.26    1.43
  -6   1   2   19.90    1.44
  -5  -1   2   -0.43    0.38
   5  -1  -2    0.05    0.16
  -5   1   2   -0.37    0.32
   4  -1  -2   25.61    0.88
   4  -1  -2   24.75    1.38
  -4  -1   2   25.39    0.76
  -4  -1   2   25.51    1.33
   4   1  -2   26.84    1.41
   4   1  -2   26.41    0.88
  -4   1   2   25.58    0.92
  -4   1   2   25.59    1.30
   3  -1  -2    1.85    0.22
  -3  -1   2    1.23    0.14
  -3  -1   2    0.51    0.29
  -3  -1   2    0.73    0.27
   3  -1  -2    1.23    0.35
   3  -1  -2    1.21    0.35
   3   1  -2    1.15    0.29
  -3   1   2    0.85    0.27
   3   1  -2    1.34    0.15
  -3   1   2    0.93    0.35
  -3   1   2    1.28    0.19
   3   1  -2    1.81    0.34
  -2  -1   2  178.28    4.56
   2  -1  -2  172.76    4.64
   2  -1  -2  176.14    4.82
  -2  -1   2  176.04    4.88
  -2  -1   2  175.36    4.90
   2  -1  -2  170.95    4.92
  -2   1   2  177.22    4.66
   2   1  -2  174.34    4.56
  -2   1   2  173.93    4.82
   2   1  -2  169.48    4.89
  -2   1   2  175.73    4.91
   1  -1  -2   55.21    1.58
  -1  -1   2   56.14    1.66
   1  -1  -2   57.22    1.69
   1  -1  -2   55.19    1.59
  -1  -1   2   55.21    1.64
  -1  -1   2   56.49    1.55
  -1   1   2   54.49    1.59
  -1   1   2   56.82    1.59
  -1   1   2   56.13    1.68
   1   1  -2   54.25    1.66
   1   1  -2   55.05    1.64
   1   1  -2   55.62    1.55
   0  -1  -2    1.35    0.13
   0  -1   2    1.19    0.11
   0  -1   2    1.42    0.13
   0  -1  -2    1.29    0.12
   0   1   2    1.17    0.11
   0   1  -2    1.14    0.13
   0   1   2    1.17    0.08
   0   1  -2    1.11    0.13
   0   1   2    1.44    0.14
  -1  -1  -2   10.79    0.51
   1  -1   2   11.13    0.51
  -1  -1  -2   11.08    0.37
   1  -1   2   10.35    0.46
   1  -1   2   11.20    0.42
  -1  -1  -2   10.17    0.48
   1   1   2    9.82    0.47
  -1   1  -2   11.32    0.48
   1   1   2   10.46    0.38
  -1   1  -2   10.58    0.42
   1   1   2   10.21    0.50
  -1   1  -2   10.28    0.50
  -2  -1  -2   49.19    1.83
   2  -1   2   49.57    1.44
  -2  -1  -2   48.00    1.70
   2  -1   2   48.39    1.43
  -2  -1  -2   50.23    1.31
   2  -1   2   49.03    1.69
   2  -1   2   50.36    1.69
   2   1   2   49.15    1.31
  -2   1  -2   48.54    1.83
  -2   1  -2   48.35    1.69
   2   1   2   49.73    1.69
   2   1   2   48.29    1.72
   3  -1   2    1.34    0.34
   3  -1   2    2.01    0.21
   3  -1   2    1.82    0.20
   3  -1   2    2.26    0.43
  -3  -1  -2    1.71    0.37
  -3  -1  -2    1.38    0.37
  -3   1  -2    1.78    0.41
   3   1   2    1.74    0.38
  -3   1  -2    2.18    0.40
   3   1   2    1.31    0.36
  -4  -1  -2   19.51    1.16
   4  -1   2   18.83    0.66
   4  -1   2   17.64    1.12
   4  -1   2   19.19    0.65
   4   1   2   18.62    1.16
  -4   1  -2   19.40    1.14
  -5  -1  -2    4.71    0.78
   5  -1   2    4.51    0.87
  -5   1  -2    4.38    0.79
   5   1   2    2.72    0.64
  -6  -1  -2    6.30    0.95
   6  -1   2    7.40    1.09
  -6   1  -2    8.77    1.13
   6   1   2    5.45    0.91
  -7  -1  -2    4.91    0.97
   7  -1   2    6.63    1.11
   7   1   2    3.40    0.99
  -7   1  -2    6.43    1.09
  -8  -1  -2    0.37    0.89
   8  -1   2    1.52    0.82
   8   1   2   -1.07    0.81
  -8   1  -2   -0.52    0.86
   9  -1   2    1.85    1.35
  -9  -1  -2    4.16    1.39
   9   1   2    4.64    1.42
  -9   1  -2    4.28    1.31
  -9  -2   2    1.78    1.08
   9  -2  -2    2.65    1.22
  -9   2   2    0.96    1.25
   9   2  -2    2.13    1.17
  -8  -2   2   -0.39    0.75
   8  -2  -2    0.80    0.89
   8   2  -2   -0.44    0.79
  -8   2   2    0.18    0.93
  -7  -2   2   -0.24    0.59
   7  -2  -2   -1.08    0.57
   7   2  -2    0.37    0.63
  -7   2   2    0.51    0.71
   6  -2  -2    0.91    0.29
   6  -2  -2    1.19    0.58
   6  -2  -2    0.80    0.29
  -6  -2   2    0.99    0.59
   6   2  -2    0.84    0.54
  -6   2   2    0.20    0.47
   5  -2  -2    7.11    0.51
  -5  -2   2    7.44    0.97
   5  -2  -2    8.04    1.18
  -5   2   2    6.96    0.88
   5   2  -2    6.89    1.01
  -4  -2   2   13.90    0.96
   4  -2  -2   13.02    0.63
  -4  -2   2   12.30    0.46
   4  -2  -2   12.28    0.98
  -4   2   2   12.29    0.86
  -4   2   2   12.76    0.65
   4   2  -2   10.64    0.88
  -3  -2   2   74.95    2.52
  -3  -2   2   69.24    2.44
   3  -2  -2   70.32    2.38
   3  -2  -2   79.22    2.58
  -3  -2   2   70.83    2.00
  -3  -2   2   71.55    2.49
   3  -2  -2   71.59    2.17
  -3   2   2   72.77    2.19
   3   2  -2   69.01    2.46
   3   2  -2   70.79    2.02
  -3   2   2   69.71    2.39
  -3   2   2   71.51    2.48
   2  -2  -2   60.51    2.01
  -2  -2   2   65.80    2.11
  -2  -2   2   65.79    2.14
  -2  -2   2   64.85    1.85
  -2  -2   2   65.13    2.10
   2  -2  -2   67.02    1.97
   2  -2  -2   64.98    2.30
   2   2  -2   65.20    1.87
  -2   2   2   65.49    2.11
  -2   2   2   64.95    2.04
  -2   2   2   63.66    1.97
   2   2  -2   65.30    2.10
   1  -2  -2  116.48    3.24
  -1  -2   2  118.99    3.28
   1  -2  -2  117.75    3.27
  -1  -2   2  116.65    3.20
  -1  -2   2  120.20    3.20
   1  -2  -2  115.37    3.17
   1   2  -2  115.80    3.29
  -1   2   2  115.77    3.26
   1   2  -2  116.00    3.19
  -1   2   2  115.73    3.17
  -1   2   2  114.07    3.25
   1   2  -2  114.53    3.19
   0  -2  -2   53.02    1.51
   0  -2   2   54.01    1.40
   0  -2   2   54.79    1.62
   0  -2   2   55.53    1.63
   0  -2  -2   53.03    1.59
   0  -2  -2   52.63    1.60
   0  -2   2   53.32    1.40
   0   2   2   52.85    1.61
   0   2  -2   50.96    1.60
   0   2   2   52.53    1.59
   0   2   2   53.64    1.51
   0   2  -2   55.02    1.63
  -1  -2  -2   57.60    1.80
   1  -2   2   58.85    1.84
  -1  -2  -2   61.38    1.81
   1  -2   2   58.85    1.74
   1  -2   2   57.48    1.77
  -1  -2  -2   59.16    1.84
  -1  -2  -2   59.62    1.72
  -1   2  -2   59.21    1.84
   1   2   2   59.12    1.72
   1   2   2   59.92    1.84
  -1   2  -2   60.64    1.74
  -1   2  -2   57.79    1.77
   2  -2   2   36.51    1.31
   2  -2   2   32.37    1.30
   2  -2   2   36.60    1.19
   2  -2   2   34.55    1.16
  -2  -2  -2   32.73    1.34
  -2  -2  -2   33.95    1.05
  -2  -2  -2   34.42    1.34
   2   2   2   34.55    1.32
  -2   2  -2   35.15    1.30
  -2   2  -2   34.04    1.33
   2   2   2   34.53    1.34
   2   2   2   35.60    1.06
   3  -2   2  119.32    3.38
  -3  -2  -2  120.83    3.81
  -3  -2  -2  123.77    3.80
   3  -2   2  120.18    3.75
   3  -2   2  126.18    3.78
  -3  -2  -2  120.85    3.16
   3  -2   2  116.71    3.39
  -3   2  -2  125.05    3.80
   3   2   2  119.13    3.75
  -3   2  -2  119.15    3.75
   3   2   2  117.41    3.79
   4  -2   2    1.41    0.40
   4  -2   2    0.79    0.23
   4  -2   2    0.94    0.23
  -4  -2  -2    0.12    0.36
  -4   2  -2    0.85    0.38
   4   2   2    0.71    0.36
   5  -2   2    8.81    0.50
   5  -2   2    7.36    0.47
   5  -2   2    7.99    1.15
  -5  -2  -2    7.44    0.96
  -5   2  -2    8.63    1.03
   5   2   2    8.35    0.99
   6  -2   2    4.32    0.80
  -6  -2  -2    3.97    0.83
   6  -2   2    5.01    0.33
   6  -2   2    4.00    0.34
  -6   2  -2    5.60    0.93
   6   2   2    5.29    0.91
  -7  -2  -2    0.14    0.64
   7  -2   2    0.42    0.65
  -7   2  -2   -0.12    0.65
   7   2   2    0.20    0.65
   8  -2   2    0.82    0.92
  -8  -2  -2    1.58    0.88
  -8   2  -2    2.35    0.99
   8   2   2    2.02    0.95
   9  -2   2    6.22    1.59
  -9  -2  -2    2.67    1.32
   9   2   2    3.41    1.33
  -9   2  -2    4.35    1.37
   9  -3  -2    5.08    1.38
  -9  -3   2    3.12    1.16
   9   3  -2    4.42    1.29
  -9   3   2    1.28    1.17
   8  -3  -2    2.24    0.97
  -8  -3   2    4.01    1.09
  -8   3   2    2.38    1.07
   8   3  -2    1.78    0.96
  -7  -3   2    9.05    1.30
   7  -3  -2   10.59    0.77
   7  -3  -2   13.86    1.07
   7  -3  -2   10.62    1.42
   7   3  -2   10.56    1.36
  -7   3   2   13.31    1.49
  -6  -3   2   -0.81    0.46
   6  -3  -2    0.02    0.54
   6  -3  -2    0.45    0.32
   6   3  -2    0.28    0.47
  -6   3   2    0.30    0.52
  -5  -3   2   34.56    1.82
   5  -3  -2   33.72    1.42
   5  -3  -2   29.57    1.74
   5   3  -2   32.62    1.75
  -5   3   2   33.52    1.71
  -4  -3   2   54.86    2.22
  -4  -3   2   52.37    1.61
   4  -3  -2   51.45    2.21
  -4  -3   2   52.99    1.57
   4  -3  -2   54.72    1.84
  -4   3   2   50.64    2.10
  -4   3   2   53.68    1.86
   4   3  -2   55.11    2.22
   3  -3  -2    0.20    0.22
  -3  -3   2    0.43    0.16
   3  -3  -2    0.10    0.26
  -3  -3   2    0.86    0.33
   3  -3  -2    0.62    0.33
  -3  -3   2    0.01    0.25
  -3   3   2    0.51    0.29
   3   3  -2    0.21    0.20
   3   3  -2    0.36    0.17
  -3   3   2    0.40    0.33
  -3   3   2    0.18    0.21
  -2  -3   2    2.54    0.37
   2  -3  -2    1.59    0.30
  -2  -3   2    2.52    0.24
   2  -3  -2    1.91    0.29
   2  -3  -2    2.23    0.31
  -2  -3   2    1.99    0.40
   2   3  -2    1.67    0.24
  -2   3   2    1.52    0.26
  -2   3   2    1.42    0.29
   2   3  -2    1.39    0.30
  -2   3   2    1.58    0.29
   2   3  -2    2.09    0.36
   1  -3  -2  597.47   15.35
   1  -3  -2  586.74   15.46
  -1  -3   2  617.82   15.51
   1  -3  -2  593.97   15.43
  -1  -3   2  592.16   15.32
  -1  -3   2  601.10   15.41
  -1   3   2  598.18   15.48
   1   3  -2  593.88   15.41
  -1   3   2  579.21   15.33
  -1   3   2  587.03   15.40
   1   3  -2  585.29   15.49
   1   3  -2  599.06   15.31
   0  -3  -2   30.40    1.00
   0  -3  -2   28.79    1.08
   0  -3   2   29.68    1.09
   0  -3   2   29.65    1.09
   0  -3  -2   30.05    1.05
   0  -3   2   31.14    0.92
   0  -3   2   30.57    0.87
   0   3   2   30.69    1.06
   0   3  -2   29.28    1.09
   0   3   2   30.06    1.01
   0   3   2   28.34    1.08
   0   3  -2   29.97    1.10
   1  -3   2    4.09    0.36
  -1  -3  -2    3.11    0.28
   1  -3   2    3.80    0.34
   1  -3   2    3.74    0.39
  -1  -3  -2    3.60    0.33
   1  -3   2    2.62    0.24
  -1  -3  -2    2.58    0.32
   1   3   2    3.54    0.31
  -1   3  -2    2.32    0.23
   1   3   2    3.35    0.31
   1   3   2    3.05    0.29
  -1   3  -2    3.46    0.34
   2  -3   2  102.94    3.04
  -2  -3  -2   98.36    3.17
  -2  -3  -2  103.61    3.17
  -2  -3  -2  102.26    3.15
  -2  -3  -2  102.96    2.90
   2  -3   2  105.47    3.10
  -2   3  -2  100.91    3.06
   2   3   2  104.36    2.91
  -2   3  -2  101.88    3.17
   2   3   2  104.34    3.18
   3  -3   2   11.54    0.66
  -3  -3  -2   12.98    0.55
  -3  -3  -2   13.22    0.54
  -3  -3  -2   12.75    0.86
   3  -3   2   12.77    0.70
   3  -3   2   11.00    0.76
  -3   3  -2   13.15    0.86
  -3   3  -2   12.83    0.84
   3   3   2   11.95    0.83
   4  -3   2    0.13    0.29
  -4  -3  -2   -0.10    0.09
  -4  -3  -2   -0.05    0.28
  -4  -3  -2   -0.08    0.10
   4  -3   2   -0.05    0.24
   4  -3   2    0.32    0.21
   4   3   2   -0.06    0.27
  -4   3  -2   -0.27    0.28
   5  -3   2    5.70    0.49
   5  -3   2    4.49    0.51
  -5  -3  -2    5.37    0.85
   5  -3   2    5.31    0.96
  -5   3  -2    4.10    0.76
   5   3   2    4.76    0.85
   6  -3   2    0.76    0.60
  -6  -3  -2    1.49    0.61
   6  -3   2    0.62    0.35
   6  -3   2    1.15    0.47
   6   3   2    0.44    0.57
  -6   3  -2    1.33    0.64
   7  -3   2    6.87    1.11
   7  -3   2    5.83    0.49
  -7  -3  -2    5.92    1.14
   7  -3   2    6.28    0.43
  -7   3  -2    7.24    1.26
   7   3   2    5.13    1.12
  -8  -3  -2    0.53    0.99
   8  -3   2   -0.44    0.92
   8   3   2    2.13    0.92
  -8   3  -2   -0.08    0.93
  -9  -3  -2    3.49    1.24
   9  -3   2    6.46    1.58
   9   3   2    5.58    1.44
  -9   3  -2    4.43    1.37
  -9  -4   2    5.50    1.36
   9  -4  -2    2.67    1.27
  -9   4   2    2.56    1.35
   9   4  -2    3.34    1.27
   8  -4  -2    8.26    0.71
  -8  -4   2    6.33    1.28
   8  -4  -2    6.71    1.40
   8   4  -2   10.19    1.51
  -8   4   2    6.24    1.22
  -7  -4   2    6.57    1.31
   7  -4  -2    8.36    1.40
   7  -4  -2    7.34    0.77
   7  -4  -2    7.21    0.73
   7   4  -2   10.60    1.33
  -7   4   2    9.09    1.23
   6  -4  -2   -0.33    0.57
   6  -4  -2    0.04    0.38
  -6  -4   2    0.52    0.60
  -6   4   2    0.40    0.54
   6   4  -2   -0.21    0.49
   5  -4  -2    1.24    0.50
  -5  -4   2    0.57    0.44
  -5  -4   2    1.28    0.24
   5  -4  -2    1.31    0.42
  -5  -4   2    1.45    0.27
  -5   4   2    1.43    0.53
   5   4  -2    1.22    0.50
  -4  -4   2    1.97    0.55
   4  -4  -2    0.96    0.32
   4  -4  -2    1.44    0.47
  -4  -4   2    1.40    0.25
  -4  -4   2    1.85    0.32
  -4   4   2    1.59    0.43
  -4   4   2    1.18    0.33
   4   4  -2    0.97    0.44
   3  -4  -2    0.34    0.32
   3  -4  -2    0.44    0.31
   3  -4  -2    0.41    0.25
  -3  -4   2    0.08    0.33
  -3  -4   2    0.33    0.27
  -3  -4   2   -0.15    0.20
  -3   4   2    0.21    0.24
  -3   4   2    0.44    0.25
   3   4  -2    0.09    0.21
  -3   4   2    0.10    0.29
  -2  -4   2   27.34    1.08
  -2  -4   2   27.28    1.22
   2  -4  -2   28.28    1.17
  -2  -4   2   25.63    1.07
   2  -4  -2   26.03    1.18
   2  -4  -2   28.52    1.15
  -2  -4   2   28.88    1.16
   2   4  -2   27.64    1.13
  -2   4   2   26.80    1.13
   2   4  -2   25.84    1.22
  -2   4   2   28.60    1.17
  -2   4   2   25.76    1.15
   1  -4  -2    9.31    0.53
  -1  -4   2    9.93    0.58
   1  -4  -2    9.40    0.67
  -1  -4   2    8.30    0.47
  -1  -4   2    9.68    0.58
   1  -4  -2    9.47    0.55
  -1  -4   2    8.58    0.58
   1   4  -2    9.37    0.61
  -1   4   2    8.72    0.53
  -1   4   2    9.14    0.61
   1   4  -2    8.84    0.47
  -1   4   2    9.49    0.53
   0  -4   2    3.16    0.41
   0  -4  -2    3.46    0.32
   0  -4  -2    3.19    0.31
   0  -4  -2    3.05    0.30
   0  -4   2    3.09    0.22
   0  -4   2    3.16    0.22
   0  -4   2    3.33    0.40
   0  -4   2    3.33    0.40
   0  -4  -2    3.49    0.41
   0   4   2    2.16    0.28
   0   4  -2    2.32    0.34
   0   4   2    3.06    0.40
   1  -4   2   65.04    1.95
  -1  -4  -2   65.83    2.09
   1  -4   2   66.37    2.31
  -1  -4  -2   66.28    2.10
   1  -4   2   64.06    2.14
  -1  -4  -2   62.67    2.10
   1  -4   2   65.94    2.16
   1   4   2   62.44    2.08
  -1   4  -2   67.34    2.16
  -1   4  -2   64.22    1.92
   1   4   2   68.63    2.27
  -2  -4  -2    9.89    0.71
   2  -4   2   10.92    0.74
   2  -4   2    9.37    0.62
  -2  -4  -2    9.28    0.57
  -2  -4  -2    9.30    0.67
   2  -4   2    9.80    0.70
  -2  -4  -2   10.09    0.72
   2  -4   2    9.87    0.65
  -2   4  -2   11.65    0.64
   2   4   2   10.55    0.58
   2   4   2   10.07    0.66
  -2   4  -2   10.08    0.70
   3  -4   2   33.35    1.48
   3  -4   2   33.35    1.39
  -3  -4  -2   35.53    1.24
   3  -4   2   35.25    1.40
  -3  -4  -2   33.57    1.22
  -3  -4  -2   34.01    1.57
   3   4   2   36.72    1.60
  -3   4  -2   35.03    1.49
  -3   4  -2   36.17    1.58
  -4  -4  -2    0.16    0.16
   4  -4   2    0.50    0.26
  -4  -4  -2    0.20    0.19
   4  -4   2    0.34    0.35
   4  -4   2    0.31    0.35
  -4  -4  -2   -0.33    0.32
  -4   4  -2    0.17    0.34
   4   4   2    0.00    0.35
   5  -4   2    5.57    0.87
   5  -4   2    5.05    0.61
   5  -4   2    4.27    0.55
  -5  -4  -2    5.69    0.90
  -5   4  -2    4.07    0.82
   5   4   2    4.01    0.77
   6  -4   2    6.82    0.67
   6  -4   2    6.83    0.73
  -6  -4  -2    8.00    1.14
   6  -4   2    6.85    1.05
   6   4   2    9.34    1.23
  -6   4  -2    6.00    1.02
   7  -4   2    5.90    0.61
  -7  -4  -2    2.66    1.02
   7  -4   2    4.16    0.66
   7  -4   2    6.54    1.17
  -7   4  -2    6.38    1.20
   8  -4   2    5.28    1.23
  -8  -4  -2    2.58    0.98
   8   4   2    4.34    1.18
  -8   4  -2    2.55    1.09
  -9  -4  -2    2.69    1.56
   9  -4   2    1.97    1.20
  -9   4  -2   -0.45    1.13
  -9  -5   2   -0.50    1.18
   9  -5  -2   -0.21    1.11
  -9   5   2    1.96    1.40
   9   5  -2    0.56    1.18
  -8  -5   2    0.62    0.92
   8  -5  -2    0.74    0.62
   8  -5  -2    2.25    1.15
   8   5  -2   -0.50    0.87
  -8   5   2    1.54    0.94
   7  -5  -2    2.75    0.97
  -7  -5   2    3.85    1.00
   7  -5  -2    5.34    0.70
   7   5  -2    5.78    1.08
  -7   5   2    4.47    1.07
  -6  -5   2   14.54    0.57
  -6  -5   2   15.13    1.41
   6  -5  -2   15.27    1.63
  -6  -5   2   14.02    0.59
   6  -5  -2   15.33    1.04
   6   5  -2   13.51    1.29
  -6   5   2   17.32    1.42
  -5  -5   2   -0.18    0.30
  -5  -5   2    1.13    0.54
   5  -5  -2    0.05    0.45
   5  -5  -2    0.70    0.40
   5   5  -2    0.67    0.56
  -5   5   2    1.14    0.48
  -4  -5   2    1.79    0.32
  -4  -5   2    1.78    0.39
   4  -5  -2    1.53    0.53
   4   5  -2    1.72    0.49
  -4   5   2    1.96    0.44
  -4   5   2    1.59    0.48
  -3  -5   2    7.75    0.57
   3  -5  -2    6.19    0.72
  -3  -5   2    6.38    0.75
  -3  -5   2    8.04    0.67
   3  -5  -2    7.32    0.71
  -3   5   2    8.61    0.68
   3   5  -2    6.65    0.71
  -3   5   2    6.82    0.61
  -2  -5   2    4.56    0.45
   2  -5  -2    3.69    0.49
   2  -5  -2    4.71    0.55
  -2  -5   2    4.84    0.56
   2  -5  -2    4.98    0.58
  -2  -5   2    4.89    0.53
  -2   5   2    4.94    0.47
  -2   5   2    4.88    0.55
   2   5  -2    4.66    0.46
  -2   5   2    5.57    0.62
   2   5  -2    5.88    0.66
  -1  -5   2   20.26    1.00
  -1  -5   2   20.17    0.98
  -1  -5   2   18.86    0.94
   1  -5  -2   18.10    0.88
   1  -5  -2   18.81    0.98
   1  -5  -2   18.19    0.88
  -1  -5   2   18.64    0.80
   1   5  -2   19.36    0.80
   1   5  -2   18.73    0.98
  -1   5   2   20.70    1.01
  -1   5   2   19.17    0.88
  -1   5   2   18.79    0.87
   0  -5   2   -0.25    0.22
   0  -5   2   -0.02    0.17
   0  -5  -2    0.23    0.23
   0  -5  -2    0.06    0.18
   0  -5   2   -0.04    0.12
   0  -5   2   -0.12    0.20
   0  -5  -2    0.25    0.19
   0  -5   2    0.28    0.12
   0   5   2    0.03    0.19
   0   5  -2   -0.07    0.19
   0   5   2    0.15    0.19
   1  -5   2  142.53    4.33
   1  -5   2  143.56    4.34
  -1  -5  -2  149.21    4.25
  -1  -5  -2  142.70    4.26
   1  -5   2  141.54    4.30
   1  -5   2  145.86    4.05
   1   5   2  147.18    4.28
   1   5   2  147.24    4.27
  -1   5  -2  142.58    3.99
  -1   5  -2  150.72    4.34
   1   5   2  150.42    4.25
  -2  -5  -2   -0.09    0.31
   2  -5   2    0.44    0.25
  -2  -5  -2    0.53    0.29
   2  -5   2    0.40    0.21
  -2  -5  -2    0.82    0.34
   2  -5   2    0.03    0.31
   2  -5   2    0.35    0.31
  -2   5  -2    0.26    0.24
  -2   5  -2    0.62    0.28
   2   5   2    0.12    0.23
   2   5   2    0.57    0.26
  -3  -5  -2   32.81    1.31
  -3  -5  -2   34.55    1.62
   3  -5   2   31.79    1.45
   3  -5   2   35.07    1.52
  -3  -5  -2   34.43    1.32
  -3   5  -2   34.72    1.59
   3   5   2   35.32    1.60
  -3   5  -2   34.11    1.47
   4  -5   2    3.16    0.55
   4  -5   2    2.51    0.57
  -4  -5  -2    3.72    0.40
  -4  -5  -2    3.70    0.44
   4   5   2    4.24    0.73
  -4   5  -2    4.17    0.71
  -5  -5  -2    5.06    0.92
  -5  -5  -2    5.37    0.42
   5  -5   2    6.39    0.96
   5  -5   2    4.99    0.65
  -5  -5  -2    5.90    0.40
  -5   5  -2    6.41    0.92
   5   5   2    4.41    0.80
   6  -5   2    3.32    0.57
  -6  -5  -2    3.20    0.90
   6  -5   2    2.86    0.86
  -6   5  -2    3.57    0.81
   6   5   2    3.92    0.94
   7  -5   2    7.09    0.78
   7  -5   2    6.32    1.21
  -7  -5  -2    5.18    1.13
   7   5   2    6.29    1.16
  -8  -5  -2    2.61    1.08
   8  -5   2    1.32    1.09
   8   5   2    2.32    1.06
  -8   5  -2    3.54    1.13
  -9  -5  -2    2.97    1.35
   9  -5   2    0.95    1.38
   9   5   2    1.65    1.30
  -9  -6   2    1.70    1.33
  -9   6   2    2.25    1.51
   9   6  -2    1.87    1.51
   8  -6  -2    0.38    1.08
  -8  -6   2    1.49    1.07
   8  -6  -2    0.45    0.75
  -8   6   2    1.01    0.97
   8   6  -2    0.91    1.03
   7  -6  -2    0.47    0.61
   7  -6  -2   -0.52    0.85
  -7  -6   2   -0.18    0.82
  -7   6   2    0.12    0.72
  -6  -6   2    3.95    0.94
  -6  -6   2    3.04    0.50
   6  -6  -2    2.96    0.80
   6  -6  -2    3.50    0.67
   6   6  -2    5.38    0.98
  -6   6   2    3.48    0.86
  -5  -6   2   40.86    1.60
   5  -6  -2   36.41    1.80
   5  -6  -2   41.86    2.14
  -5  -6   2   46.23    2.29
  -5  -6   2   41.96    1.51
   5   6  -2   39.63    2.07
  -5   6   2   40.32    2.02
  -4  -6   2   17.65    0.91
   4  -6  -2   16.74    1.19
  -4  -6   2   16.32    1.24
  -4  -6   2   16.32    0.97
  -4   6   2   17.41    1.18
   4   6  -2   16.21    1.16
  -3  -6   2   19.32    1.05
  -3  -6   2   21.01    1.05
   3  -6  -2   19.00    1.13
   3   6  -2   18.84    1.10
  -3   6   2   20.50    1.16
  -3   6   2   20.59    1.11
   3   6  -2   20.08    1.23
   2  -6  -2    8.72    0.68
  -2  -6   2   10.63    1.29
   2  -6  -2    8.85    0.72
  -2  -6   2    8.82    0.66
  -2   6   2    7.40    0.69
  -2   6   2    7.68    0.64
   2   6  -2    8.67    0.73
  -2   6   2    8.43    0.68
   2   6  -2    9.00    0.64
  -1  -6   2   59.39    2.10
   1  -6  -2   55.91    1.94
  -1  -6   2   55.08    1.82
   1  -6  -2   53.74    1.95
  -1   6   2   55.40    2.11
  -1   6   2   54.59    1.93
  -1   6   2   54.25    2.01
   1   6  -2   55.47    2.08
   0  -6  -2    4.97    0.54
   0  -6   2    4.70    0.58
   0  -6   2    4.55    0.58
   0  -6   2    4.51    0.36
   0  -6  -2    4.62    0.44
   0  -6   2    4.83    0.36
   0  -6  -2    4.88    0.53
   0   6   2    5.11    0.60
   0   6   2    5.82    0.53
   0   6  -2    5.56    0.55
   1  -6   2  104.87    3.39
  -1  -6  -2  108.99    3.27
  -1  -6  -2  101.31    3.26
  -1  -6  -2  101.33    3.23
   1  -6   2  103.80    3.03
   1   6   2  107.97    3.31
  -1   6  -2  104.79    3.34
  -1   6  -2   99.41    2.98
   1   6   2  104.52    3.32
  -2  -6  -2   58.57    2.10
  -2  -6  -2   55.35    2.08
  -2  -6  -2   52.79    2.13
   2  -6   2   58.97    2.21
   2  -6   2   61.84    2.04
   2   6   2   59.80    2.16
   2   6   2   59.60    2.21
  -2   6  -2   59.38    1.96
  -2   6  -2   54.45    2.16
  -3  -6  -2    5.62    0.62
   3  -6   2    5.87    0.68
  -3  -6  -2    5.02    0.73
  -3  -6  -2    5.70    0.60
   3  -6   2    5.21    0.66
   3   6   2    5.86    0.72
  -3   6  -2    4.67    0.64
  -3   6  -2    5.31    0.73
  -4  -6  -2    2.04    0.44
   4  -6   2    2.26    0.51
   4  -6   2    1.35    0.46
  -4  -6  -2    1.56    0.36
  -4  -6  -2    1.37    0.51
  -4   6  -2    1.93    0.54
   5  -6   2   17.86    1.14
  -5  -6  -2   16.99    1.41
   5  -6   2   20.11    1.42
  -5  -6  -2   19.98    0.94
  -5  -6  -2   18.65    0.88
  -5   6  -2   18.31    1.40
   5   6   2   17.39    1.35
   6  -6   2    1.17    0.53
   6  -6   2    1.76    0.71
  -6  -6  -2    0.81    0.70
  -6   6  -2    1.38    0.72
   6   6   2    0.35    0.69
   7  -6   2   -0.29    0.55
  -7  -6  -2   -0.41    0.80
   7  -6   2    0.05    0.83
  -7   6  -2    0.54    0.81
   7   6   2    0.53    0.78
  -8  -6  -2    1.77    1.09
   8  -6   2    1.69    1.09
   8  -6   2    1.13    1.17
  -8   6  -2   -1.25    1.03
   8   6   2    0.99    1.14
  -9  -6  -2    0.38    1.35
  -9   6  -2    1.11    1.56
   9   6   2   -1.26    1.43
  -9  -7   2    7.10    1.73
   9  -7  -2    7.73    1.76
   9   7  -2    5.78    1.74
   8  -7  -2    1.71    1.19
  -8  -7   2    4.54    1.43
   8  -7  -2    2.61    0.91
   8   7  -2    0.24    1.14
  -8   7   2   -0.40    1.06
  -7  -7   2    2.60    1.07
   7  -7  -2    3.16    0.82
   7  -7  -2    2.09    1.07
  -7   7   2    0.05    0.78
   7   7  -2    1.62    0.95
  -6  -7   2    0.19    0.81
   6  -7  -2    1.94    0.66
   6  -7  -2    0.19    0.64
  -6  -7   2    0.68    0.58
  -6  -7   2    0.77    0.38
  -6   7   2    0.45    0.65
   6   7  -2    2.87    0.89
  -5  -7   2   34.71    1.41
   5  -7  -2   32.63    1.74
  -5  -7   2   30.82    2.01
   5  -7  -2   28.77    1.89
  -5   7   2   34.67    1.88
   5   7  -2   31.25    1.84
   4  -7  -2    0.69    0.52
  -4  -7   2    0.67    0.49
  -4  -7   2    1.39    0.41
  -4   7   2    1.12    0.52
   4   7  -2    1.99    0.57
  -3  -7   2   11.35    0.84
   3  -7  -2   10.39    0.89
  -3   7   2    9.60    0.83
  -3   7   2   11.99    0.93
   3   7  -2   11.41    0.86
   3   7  -2   11.51    1.13
  -2  -7   2   44.74    1.75
  -2  -7   2   43.61    1.81
   2  -7  -2   45.91    1.82
   2   7  -2   43.97    1.96
  -2   7   2   48.10    1.83
   2   7  -2   44.17    1.68
  -2   7   2   45.11    1.95
  -2   7   2   39.92    1.69
   1  -7  -2   14.70    0.94
   1  -7  -2   13.51    0.84
  -1  -7   2   14.67    0.77
  -1  -7   2   15.69    0.81
  -1  -7   2   15.43    0.98
  -1   7   2   15.19    0.88
   1   7  -2   15.07    0.98
  -1   7   2   17.92    0.96
  -1   7   2   14.21    0.98
   0  -7  -2    0.18    0.33
   0  -7   2    0.08    0.18
   0  -7   2   -0.02    0.28
   0  -7  -2    0.08    0.28
   0  -7   2    0.02    0.20
   0  -7  -2   -0.20    0.21
   0   7  -2   -0.23    0.25
   0   7   2    0.01    0.23
   0   7   2    0.44    0.24
  -1  -7  -2   39.04    1.61
   1  -7   2   36.74    1.70
   1  -7   2   38.27    1.39
  -1  -7  -2   42.98    1.62
  -1   7  -2   36.45    1.66
   1   7   2   38.27    1.65
  -1   7  -2   37.83    1.36
  -2  -7  -2   11.07    0.86
   2  -7   2   11.81    0.88
   2  -7   2   12.06    0.76
  -2   7  -2   11.57    0.90
  -2   7  -2   10.38    0.72
   2   7   2   11.83    0.92
   2   7   2   13.16    0.88
  -3  -7  -2   32.82    1.73
   3  -7   2   36.31    1.69
   3  -7   2   32.32    1.56
  -3  -7  -2   33.15    1.51
  -3   7  -2   34.89    1.69
   3   7   2   36.00    1.70
  -3   7  -2   33.96    1.69
   4  -7   2    3.04    0.62
  -4  -7  -2    1.12    0.55
  -4  -7  -2    1.99    0.48
   4   7   2    2.50    0.68
  -4   7  -2    3.39    0.75
  -5  -7  -2    7.91    0.77
   5  -7   2    7.66    0.91
   5  -7   2    8.63    1.09
  -5  -7  -2    7.55    0.67
  -5  -7  -2    9.56    1.27
   5   7   2   10.20    1.22
  -5   7  -2    7.27    1.10
  -6  -7  -2    0.28    0.42
  -6  -7  -2    1.10    0.35
  -6  -7  -2    1.48    0.84
   6  -7   2    0.43    0.57
   6  -7   2    0.86    0.77
  -6   7  -2    1.39    0.75
   6   7   2    0.47    0.75
  -7  -7  -2    1.14    0.94
   7  -7   2    1.25    0.70
   7  -7   2    2.94    1.24
  -7   7  -2    1.37    0.91
   7   7   2   -0.39    0.92
  -8  -7  -2    1.74    1.26
   8  -7   2    0.71    1.14
   8  -7   2    2.72    0.95
  -8   7  -2    1.16    1.22
   8   7   2    1.93    1.21
   8  -8  -2    6.51    1.62
  -8  -8   2    4.54    1.63
   8  -8  -2    6.32    1.21
   8   8  -2    7.57    1.59
  -8   8   2    7.92    1.47
   7  -8  -2    3.62    0.94
   7  -8  -2    2.71    1.10
  -7  -8   2    3.25    1.26
  -7   8   2    4.13    1.09
   7   8  -2    3.74    1.09
   6  -8  -2    7.50    1.06
  -6  -8   2    6.50    0.72
   6  -8  -2    8.37    1.23
  -6  -8   2    7.99    1.26
   6   8  -2    4.43    1.05
  -6   8   2    5.47    1.14
   5  -8  -2   25.70    1.79
   5  -8  -2   24.90    1.58
  -5  -8   2   29.61    1.93
  -5  -8   2   27.45    1.39
  -5   8   2   28.02    1.67
   5   8  -2   31.76    1.81
   4  -8  -2    4.79    0.81
  -4  -8   2    3.92    0.82
  -4  -8   2    4.20    0.63
   4   8  -2    2.87    0.68
  -4   8   2    4.78    0.77
   3  -8  -2   11.96    1.03
  -3  -8   2   11.73    0.94
   3  -8  -2   13.67    1.03
   3   8  -2   11.87    0.91
   3   8  -2   12.39    1.14
  -3   8   2   13.87    1.00
  -2  -8   2    0.19    0.35
   2  -8  -2    0.86    0.38
  -2  -8   2    0.44    0.43
   2   8  -2    0.03    0.31
  -2   8   2    0.14    0.37
  -1  -8   2   12.89    0.95
  -1  -8   2   11.92    0.71
   1  -8  -2   10.55    0.79
  -1  -8   2   12.98    0.80
   1   8  -2    9.98    0.87
  -1   8   2   12.28    0.89
  -1   8   2   11.53    0.86
   0  -8   2    9.39    0.62
   0  -8   2    9.17    0.82
   0  -8  -2    9.92    0.75
   0  -8  -2    9.95    0.76
   0   8  -2    9.98    0.82
   0   8   2    7.98    0.75
   1  -8   2   18.48    1.39
  -1  -8  -2   19.17    1.20
  -1  -8  -2   20.54    1.09
   1  -8   2   20.84    0.95
   1   8   2   20.66    1.17
  -1   8  -2   18.31    1.16
   2  -8   2    0.97    0.42
   2  -8   2    0.78    0.37
  -2  -8  -2    0.89    0.45
  -2   8  -2    1.47    0.47
   2   8   2    1.05    0.41
  -2   8  -2    1.10    0.38
  -3  -8  -2    3.21    0.71
  -3  -8  -2    2.44    0.52
   3  -8   2    2.91    0.55
   3  -8   2    2.90    0.64
  -3   8  -2    2.71    0.64
   3   8   2    1.91    0.49
  -4  -8  -2   -0.04    0.48
   4  -8   2   -0.73    0.45
   4  -8   2   -0.48    0.49
  -4  -8  -2   -0.32    0.40
  -4   8  -2   -0.51    0.47
   4   8   2    0.18    0.47
   5  -8   2    1.40    0.67
  -5  -8  -2    3.58    0.86
  -5  -8  -2    2.45    0.55
   5  -8   2    0.39    0.58
   5   8   2    0.69    0.64
  -5   8  -2    2.03    0.78
  -6  -8  -2    0.22    0.41
  -6  -8  -2   -0.26    0.78
   6  -8   2   -0.84    0.64
   6  -8   2   -0.24    0.73
  -6   8  -2    0.16    0.86
   6   8   2    0.19    0.81
  -7  -8  -2    1.57    1.12
   7  -8   2    1.33    1.03
   7  -8   2    1.70    0.80
   7   8   2    1.16    1.09
  -7   8  -2    1.29    0.96
   8  -8   2   -0.68    1.17
   8  -8   2    0.49    0.97
   8   8   2   -0.70    1.32
  -8   8  -2   -0.21    1.31
   8  -9  -2    1.74    1.50
   8  -9  -2    3.55    1.19
  -8  -9   2    3.71    1.53
   8   9  -2    0.59    1.33
  -8   9   2    1.98    1.39
  -7  -9   2    0.46    1.04
   7  -9  -2   -1.03    1.03
   7  -9  -2    1.39    0.89
   7   9  -2    0.22    0.94
  -7   9   2    0.38    1.05
  -6  -9   2    6.59    0.84
   6  -9  -2    5.42    1.25
   6  -9  -2    6.95    1.17
  -6  -9   2    6.11    1.19
  -6   9   2    5.38    1.11
   6   9  -2    7.29    1.25
  -5  -9   2    1.10    0.81
   5  -9  -2   -0.12    0.62
   5  -9  -2   -0.36    0.73
  -5   9   2    0.65    0.58
   5   9  -2   -0.08    0.62
  -4  -9   2    2.57    0.63
  -4  -9   2    2.23    0.75
   4  -9  -2    1.43    0.64
   4  -9  -2    2.60    0.70
  -4   9   2    3.36    0.72
   4   9  -2    3.48    0.74
  -3  -9   2    1.64    0.51
   3  -9  -2    1.08    0.54
   3  -9  -2    2.08    0.60
   3   9  -2    0.46    0.51
   3   9  -2    1.48    0.53
  -2  -9   2   16.14    1.14
  -2  -9   2   16.07    1.02
   2  -9  -2   18.90    1.37
  -2  -9   2   15.67    1.21
   2  -9  -2   17.19    1.12
   2   9  -2   15.33    1.20
  -2   9   2   17.03    1.14
   1  -9  -2    3.13    0.54
  -1  -9   2    3.70    0.55
  -1  -9   2    2.68    0.57
  -1  -9   2    2.24    0.40
   1  -9  -2    3.79    0.71
   1   9  -2    2.91    0.60
  -1   9   2    2.79    0.56
   0  -9  -2    1.07    0.45
   0  -9   2    0.62    0.30
   0  -9  -2    1.07    0.39
   0  -9   2    1.32    0.53
   0  -9   2    1.08    0.34
   0   9   2    0.61    0.43
  -1  -9  -2    1.76    0.58
   1  -9   2    1.35    0.39
  -1  -9  -2    3.61    0.58
   1  -9   2    1.66    0.39
   1  -9   2    2.58    0.60
   1   9   2    1.84    0.52
  -2  -9  -2    4.83    0.78
   2  -9   2    1.52    0.56
  -2  -9  -2    1.95    0.53
   2  -9   2    1.62    0.46
  -2   9  -2    2.27    0.50
  -2   9  -2    2.29    0.61
   2   9   2    3.00    0.59
   3  -9   2    1.12    0.49
  -3  -9  -2    0.94    0.46
   3  -9   2    0.71    0.54
  -3   9  -2    1.45    0.54
   4  -9   2   10.21    1.12
   4  -9   2   10.63    1.20
  -4  -9  -2   11.77    1.35
  -4   9  -2    9.25    1.17
   4   9   2   11.30    1.22
  -5  -9  -2    5.72    0.80
   5  -9   2    6.59    1.04
  -5  -9  -2    6.00    1.16
   5  -9   2    4.79    1.00
   5   9   2    6.53    1.07
  -5   9  -2    8.44    1.24
   6  -9   2   -0.27    0.71
   6  -9   2    0.82    0.83
  -6  -9  -2    1.13    0.57
  -6  -9  -2    1.29    0.93
  -6   9  -2   -0.07    0.86
  -7  -9  -2    6.32    1.57
   7  -9   2    5.46    1.09
   7  -9   2    6.29    1.27
   7   9   2    4.52    1.36
  -7   9  -2    5.75    1.44
  -8  -9  -2    2.70    1.60
   8  -9   2    0.53    1.41
   8  -9   2    1.24    1.31
  -8   9  -2    0.90    1.55
   7 -10  -2    1.10    1.24
   7 -10  -2    0.46    0.96
  -7 -10   2    0.24    1.16
  -7  10   2   -0.02    1.15
   7  10  -2    2.38    1.22
   6 -10  -2    3.45    1.02
  -6 -10   2    2.46    0.70
  -6 -10   2    4.19    1.34
   6 -10  -2    4.20    1.15
  -6  10   2    2.84    1.08
   6  10  -2    2.74    1.05
  -5 -10   2    0.93    0.62
  -5 -10   2    0.26    0.83
   5 -10  -2    1.21    0.73
   5 -10  -2   -0.31    0.76
   5  10  -2    2.46    0.83
  -5  10   2    1.04    0.79
   4 -10  -2    3.64    0.88
  -4 -10   2    4.25    0.80
  -4 -10   2    4.97    1.01
   4 -10  -2    4.90    0.99
   4  10  -2    6.26    0.90
  -4  10   2    5.92    0.97
   3 -10  -2    0.72    0.55
   3 -10  -2    1.25    0.69
  -3 -10   2    1.46    0.58
   3  10  -2    0.28    0.54
  -3  10   2    0.79    0.58
  -2 -10   2   -0.23    0.41
   2 -10  -2    0.38    0.51
   2 -10  -2    0.29    0.44
  -2 -10   2    0.15    0.41
   2  10  -2   -0.13    0.46
  -2  10   2    0.38    0.49
   1 -10  -2   11.83    0.95
  -1 -10   2   11.43    1.06
   1 -10  -2   13.31    1.19
  -1 -10   2   13.00    0.84
  -1 -10   2   14.20    1.00
   1  10  -2   12.23    1.09
  -1  10   2   11.65    1.02
   0 -10   2    0.71    0.49
   0 -10  -2    1.10    0.52
   0 -10   2    0.81    0.35
   0 -10  -2    1.45    0.46
   0  10  -2    0.99    0.47
   1 -10   2    3.36    0.55
   1 -10   2    3.29    0.52
  -1 -10  -2    3.93    0.66
  -1 -10  -2    3.27    0.73
   1 -10   2    3.81    0.72
   1  10   2    4.87    0.80
  -1  10  -2    2.96    0.72
   2 -10   2   15.08    1.26
  -2 -10  -2   13.76    1.13
  -2 -10  -2   13.10    1.18
   2 -10   2   13.15    0.95
  -2  10  -2   13.92    0.96
  -2  10  -2   14.00    1.15
   2  10   2   12.43    1.18
   3 -10   2    0.25    0.54
  -3 -10  -2    0.98    0.60
   3 -10   2    0.66    0.51
  -3 -10  -2    0.50    0.48
  -3  10  -2    0.41    0.58
  -4 -10  -2    1.33    0.86
   4 -10   2    1.64    0.68
  -4 -10  -2    2.28    0.68
   4 -10   2    1.22    0.72
  -4  10  -2    0.57    0.63
   4  10   2    0.53    0.66
  -5 -10  -2   10.72    1.16
   5 -10   2   15.67    1.47
  -5 -10  -2   12.24    1.64
   5 -10   2   10.59    1.31
  -5  10  -2   13.00    1.58
   5  10   2   10.03    1.33
  -6 -10  -2    2.17    1.18
   6 -10   2    2.82    1.06
   6 -10   2    2.10    0.96
  -6  10  -2    0.84    1.04
   6  10   2    3.05    1.04
   7 -10   2    1.71    1.04
  -7 -10  -2    1.41    1.44
   7 -10   2    1.37    1.24
  -7  10  -2    1.22    1.21
   7  10   2    0.09    1.18
  -7 -11   2   -0.56    1.49
   7 -11  -2    1.01    1.21
   7 -11  -2   -1.97    1.26
  -7  11   2   -2.11    1.20
   7  11  -2   -1.70    1.23
  -6 -11   2    0.47    0.78
  -6 -11   2    0.73    1.13
   6 -11  -2    0.47    1.07
  -6  11   2    0.85    1.02
   6  11  -2    1.29    1.03
   5 -11  -2    0.07    0.89
   5 -11  -2    0.84    0.92
  -5 -11   2    0.36    0.90
  -5 -11   2    0.11    0.71
   5  11  -2    0.60    0.84
  -5  11   2   -0.52    0.79
  -4 -11   2    6.63    1.05
   4 -11  -2    8.47    1.83
  -4 -11   2    7.85    1.53
   4 -11  -2    6.70    1.10
   4  11  -2    6.53    1.05
  -4  11   2    8.52    1.16
   3 -11  -2    0.61    0.62
   3 -11  -2    0.56    0.63
  -3 -11   2    1.36    0.61
  -3 -11   2    0.62    0.63
  -3  11   2    0.80    0.66
   3  11  -2    0.62    0.63
  -2 -11   2    7.73    0.87
   2 -11  -2    6.87    1.12
  -2 -11   2    5.19    0.89
   2 -11  -2    5.52    0.82
   2  11  -2    4.86    0.96
  -2  11   2    5.87    0.96
  -1 -11   2    1.25    0.59
  -1 -11   2    0.62    0.43
   1 -11  -2    0.78    0.62
  -1 -11   2    1.60    0.56
   1 -11  -2    1.60    0.55
   1  11  -2    1.15    0.60
  -1  11   2    0.56    0.56
   0 -11   2   -0.30    0.51
   0 -11  -2    0.45    0.57
   0 -11  -2   -0.10    0.46
   0 -11   2    0.06    0.38
   0 -11   2    0.23    0.52
   0  11   2    0.43    0.51
   0  11  -2    0.22    0.59
   1 -11   2    9.17    0.88
   1 -11   2    8.96    0.82
   1 -11   2   13.36    1.23
  -1 -11  -2   10.62    1.01
  -1 -11  -2   10.51    1.33
   1  11   2   11.59    1.25
  -1  11  -2   12.27    1.11
  -2 -11  -2   -0.25    0.62
   2 -11   2    1.58    0.53
  -2 -11  -2    0.35    0.51
   2 -11   2    0.30    0.58
  -2  11  -2    0.89    0.64
   2  11   2    1.06    0.64
   3 -11   2    0.42    0.59
  -3 -11  -2    0.02    0.61
  -3 -11  -2    0.86    0.63
   3 -11   2    0.58    0.65
  -3  11  -2   -0.69    0.64
  -4 -11  -2    0.77    0.86
   4 -11   2    2.46    1.43
   4 -11   2    1.47    0.85
  -4 -11  -2    0.22    0.68
  -4  11  -2    0.49    0.77
  -5 -11  -2    0.78    0.91
   5 -11   2   -0.29    0.83
   5 -11   2   -1.20    0.81
  -5 -11  -2   -0.92    0.72
   5  11   2   -1.44    0.77
  -5  11  -2    0.32    0.96
   6 -11   2    3.36    1.16
  -6 -11  -2    3.05    0.89
   6 -11   2    0.53    0.96
  -6 -11  -2    1.69    1.33
   6  11   2    2.61    1.21
  -6  11  -2    2.01    1.18
   7 -11   2   -0.72    1.33
  -7 -11  -2    0.79    1.39
   7 -11   2    2.29    1.29
  -7  11  -2    1.39    1.37
   7  11   2    2.39    1.32
  -6 -12   2   -0.93    0.93
   6 -12  -2    2.13    1.29
  -6 -12   2   -0.53    1.36
   6 -12  -2   -2.33    1.04
   6  12  -2   -0.21    1.19
  -6  12   2    1.58    1.24
  -5 -12   2    0.20    1.10
  -5 -12   2    2.65    0.93
   5 -12  -2    1.45    1.10
   5 -12  -2    1.07    1.01
  -5  12   2    3.50    1.24
   5  12  -2    3.62    1.06
  -4 -12   2    0.52    0.80
   4 -12  -2   -0.69    0.86
  -4 -12   2    1.21    0.88
  -4 -12   2   -0.96    0.72
   4 -12  -2    0.85    0.86
  -4  12   2    0.96    0.82
   3 -12  -2    3.71    0.87
  -3 -12   2    4.66    0.86
   3 -12  -2    3.10    0.92
  -3 -12   2    1.96    0.77
  -3  12   2    4.61    1.04
  -2 -12   2   -0.31    0.53
  -2 -12   2    1.22    0.76
   2 -12  -2   -0.01    0.74
   2 -12  -2    0.98    0.64
   2  12  -2    0.28    0.78
  -2  12   2   -0.45    0.62
  -1 -12   2    1.26    0.67
  -1 -12   2    1.05    0.53
   1 -12  -2    2.06    0.69
   1 -12  -2    2.28    0.95
   1  12  -2    0.76    0.74
  -1  12   2    1.45    0.70
   0 -12   2    1.69    0.52
   0 -12   2    1.73    0.65
   0 -12  -2    1.32    0.73
   0 -12   2    1.26    0.65
   0 -12  -2    1.14    0.60
   0  12   2    3.34    0.80
   0  12  -2    1.11    0.73
   1 -12   2    6.95    1.27
   1 -12   2    5.46    0.79
  -1 -12  -2    4.31    0.91
  -1 -12  -2    6.04    1.06
   1 -12   2    5.94    0.74
  -1  12  -2    6.38    1.08
   1  12   2    5.70    0.97
   2 -12   2    0.65    0.66
   2 -12   2    0.92    0.58
  -2 -12  -2    1.14    0.68
  -2 -12  -2    1.30    0.79
  -2  12  -2    0.19    0.65
   2  12   2    1.45    0.79
  -3 -12  -2    1.35    0.78
   3 -12   2   -0.35    0.70
  -3 -12  -2    1.32    0.77
   3 -12   2    0.69    0.72
  -3  12  -2   -1.01    0.74
  -4 -12  -2   -1.45    0.73
  -4 -12  -2    0.46    0.86
   4 -12   2    1.10    0.82
   4 -12   2    0.08    0.74
  -4 -12  -2    0.39    1.00
  -4  12  -2    0.29    0.84
  -5 -12  -2    0.03    1.19
  -5 -12  -2    1.24    0.86
   5 -12   2    2.68    1.03
   5 -12   2    1.94    0.96
  -5  12  -2   -1.36    0.94
  -6 -12  -2    2.26    1.54
   6 -12   2    4.60    1.34
   6 -12   2    2.21    1.28
  -6  12  -2    2.53    1.36
   6  12   2    3.96    1.30
   6 -13  -2    0.47    1.25
  -6 -13   2    0.58    1.61
   6 -13  -2    0.44    1.54
  -6  13   2    0.18    1.32
   6  13  -2    2.30    1.40
  -5 -13   2    1.20    1.24
  -5 -13   2   -0.23    0.95
  -5 -13   2    0.36    1.14
   5 -13  -2    0.08    1.21
   5 -13  -2    2.22    1.05
  -5  13   2    0.38    1.09
   4 -13  -2    2.76    1.19
  -4 -13   2    5.90    1.07
   4 -13  -2    3.83    1.11
  -4 -13   2    2.24    1.10
  -4 -13   2    3.92    1.09
   3 -13  -2   -0.49    0.81
  -3 -13   2    0.20    0.87
  -3 -13   2    0.21    0.79
   3 -13  -2    1.18    1.00
  -3  13   2   -0.14    0.83
   3  13  -2    1.01    0.87
  -2 -13   2   -0.10    0.75
   2 -13  -2   -0.07    0.70
   2 -13  -2   -0.11    0.81
  -2 -13   2    0.53    0.67
   2  13  -2    1.94    0.86
  -2  13   2    1.16    0.79
  -1 -13   2    0.35    0.71
  -1 -13   2   -0.03    0.57
   1 -13  -2    1.09    0.82
  -1  13   2   -0.77    0.69
   1  13  -2   -0.07    0.75
   0 -13   2   -0.24    0.78
   0 -13   2    0.87    0.56
   0 -13  -2    1.01    0.74
   0  13  -2    1.60    0.87
   0  13   2    0.48    0.79
   1 -13   2    5.56    1.13
   1 -13   2    6.33    0.79
  -1 -13  -2    8.01    1.09
  -1 -13  -2    6.00    1.21
  -1  13  -2    5.34    1.16
   1  13   2    6.55    1.16
  -2 -13  -2    2.04    0.78
   2 -13   2    3.77    1.07
   2 -13   2    4.48    0.79
  -2 -13  -2    2.70    0.87
   2  13   2    3.23    0.99
  -2  13  -2    2.76    1.07
   3 -13   2    3.15    0.95
  -3 -13  -2    3.82    1.07
   3 -13   2    3.18    0.90
  -3 -13  -2    4.67    1.06
  -3  13  -2    4.36    1.10
  -4 -13  -2    0.57    1.12
   4 -13   2    0.28    0.92
   4 -13   2    1.73    0.94
  -4 -13  -2    2.60    0.97
  -4 -13  -2    1.73    1.12
  -4  13  -2    2.25    1.15
  -5 -13  -2   12.21    1.92
   5 -13   2   11.73    1.77
  -5 -13  -2   13.32    1.79
  -5 -13  -2   14.19    1.54
  -5  13  -2   13.76    1.65
   5 -14  -2   -1.07    1.13
  -5 -14   2   -0.96    1.15
  -5 -14   2   -2.02    1.26
  -5  14   2    2.26    1.37
  -4 -14   2    0.73    1.09
  -4 -14   2    1.81    1.06
   4 -14  -2    1.06    1.21
  -4 -14   2   -1.40    1.12
   4 -14  -2    0.00    1.01
  -4  14   2   -1.18    1.18
   3 -14  -2    0.10    0.99
  -3 -14   2    0.06    0.90
   3 -14  -2    0.36    0.92
  -3 -14   2    0.43    0.91
  -3  14   2    0.27    1.01
   3  14  -2   -0.70    0.98
   2 -14  -2    1.99    1.08
   2 -14  -2    0.53    0.87
  -2 -14   2   -0.12    0.75
  -2 -14   2    1.09    0.87
   2  14  -2   -0.02    0.90
  -2  14   2    0.06    0.96
   1 -14  -2    0.56    0.87
   1 -14  -2    0.55    0.84
  -1 -14   2    1.13    0.80
  -1 -14   2    3.76    1.03
   1  14  -2    1.96    1.06
  -1  14   2    1.50    0.97
   0 -14   2   11.07    1.55
   0 -14  -2    9.82    1.21
   0 -14  -2   12.52    1.71
   0  14   2    7.96    1.31
   0  14  -2    8.27    1.40
   1 -14   2    0.82    0.89
  -1 -14  -2    1.17    0.90
  -1 -14  -2    1.04    0.85
  -1  14  -2    1.57    0.97
  -2 -14  -2    2.15    1.00
   2 -14   2    2.84    1.01
  -2 -14  -2    2.41    0.97
  -2  14  -2    4.69    1.21
   2  14   2    3.12    1.13
  -3 -14  -2    7.74    1.38
   3 -14   2    7.07    1.53
  -3 -14  -2    6.05    1.30
  -3 -14  -2    7.65    1.59
  -3  14  -2    6.94    1.38
  -4 -14  -2    0.52    1.36
   4 -14   2    0.95    1.23
  -4 -14  -2    3.19    1.16
  -4 -14  -2    1.82    1.47
  -4  14  -2    0.94    1.23
  -5 -14  -2    1.50    1.26
  -5 -14  -2   -0.06    1.30
  -5 -14  -2   -0.80    1.28
  -5  14  -2    0.99    1.37
   3 -15  -2    1.38    1.31
  -3 -15   2    0.46    1.04
  -3  15   2    2.07    1.38
   3  15  -2    1.42    1.35
  -2 -15   2   -0.45    1.08
  -2  15   2   -1.02    1.11
   2  15  -2    1.72    1.30
   1 -15  -2    1.52    1.19
  -1 -15   2    0.94    1.16
   1  15  -2   -0.86    1.01
  -1  15   2   -1.60    1.00
   0 -15   2   -0.13    1.11
   0 -15  -2    2.43    1.15
   0  15  -2    4.04    1.31
   0  15   2    3.79    1.15
  -1 -15  -2    0.96    0.97
   1 -15   2    1.58    1.13
  -1 -15  -2    1.77    1.16
   1  15   2    0.43    1.14
  -1  15  -2    1.26    1.18
  -2 -15  -2    2.43    1.08
  -2 -15  -2    1.96    1.17
   2  15   2   -0.43    1.13
  -2  15  -2    0.18    1.20
  -3 -15  -2   -0.62    1.28
  -3 -15  -2    0.39    1.11
   3 -15   2   -1.86    1.05
  -3 -15  -2    0.98    1.33
  -3  15  -2   -0.05    1.28
   1 -16  -2   -1.68    1.12
  -1 -16   2   -1.20    1.10
   1  16  -2    0.93    1.36
  -1  16   2    0.75    1.28
   0 -16  -2    8.87    1.73
   0 -16   2    5.08    1.45
   0  16  -2    8.28    1.65
   0  16   2   13.30    1.89
  -1 -16  -2   12.88    1.96
   1 -16   2   15.10    2.07
  -1  16  -2   16.68    2.04
   1  16   2   12.90    1.85
  10   0  -3   -0.83    1.28
 -10   0   3    1.20    1.36
   9   0  -3    2.00    1.20
  -9   0   3    1.77    1.19
  -8   0   3   -0.83    0.74
   8   0  -3    0.33    0.77
   7   0  -3   18.79    1.57
  -7   0   3   17.66    1.51
   6   0  -3   -0.03    0.48
  -6   0   3    0.25    0.43
  -5   0   3    0.13    0.15
  -5   0   3    0.85    0.36
   5   0  -3    0.42    0.15
   4   0  -3    0.38    0.29
   4   0  -3    0.16    0.13
  -4   0   3   -0.20    0.26
  -4   0   3   -0.16    0.12
  -3   0   3  152.44    4.10
   3   0  -3  150.83    4.08
  -3   0   3  160.01    4.53
   3   0  -3  156.28    4.49
   3   0  -3  147.76    4.60
  -3   0   3  152.92    4.57
   2   0  -3   -0.04    0.08
   2   0  -3   -0.07    0.12
  -2   0   3    0.14    0.08
   2   0  -3   -0.03    0.13
  -2   0   3   -0.23    0.13
  -2   0   3   -0.02    0.12
  -1   0   3  134.23    3.65
  -1   0   3  135.48    3.65
   1   0  -3  137.60    3.63
   1   0  -3  133.96    3.73
  -1   0   3  137.43    3.63
  -1   0   3  141.00    3.73
   0   0  -3    0.01    0.04
   0   0   3    0.06    0.05
   0   0  -3   -0.04    0.04
   0   0  -3    0.05    0.05
   0   0   3   -0.03    0.04
   1   0   3    0.69    0.16
  -1   0  -3    0.41    0.12
   1   0   3    0.54    0.09
  -1   0  -3    0.47    0.08
  -1   0  -3    0.39    0.13
   1   0   3    0.17    0.11
  -2   0  -3    0.05    0.06
  -2   0  -3    0.31    0.16
  -2   0  -3    0.03    0.16
   2   0   3   -0.17    0.15
   2   0   3    0.00    0.05
   3   0   3   95.77    3.11
  -3   0  -3   93.94    3.09
   3   0   3   94.98    2.49
   3   0   3   95.01    3.09
  -4   0  -3    0.49    0.37
   4   0   3   -0.03    0.26
   5   0   3    0.41    0.43
  -5   0  -3    0.44    0.40
  -6   0  -3    0.52    0.50
   6   0   3    0.25    0.47
   7   0   3   19.29    1.61
  -7   0  -3   17.39    1.59
   8   0   3   -0.18    0.82
  -8   0  -3   -0.23    0.85
   9   0   3    0.26    1.16
  -9   0  -3    2.00    1.16
  10  -1  -3    5.93    1.57
 -10  -1   3    4.99    1.69
 -10   1   3    3.26    1.58
  10   1  -3    4.87    1.59
   9  -1  -3    2.19    1.04
  -9  -1   3    1.79    1.25
  -9   1   3    2.70    1.19
   9   1  -3    1.81    1.15
  -8  -1   3    0.35    0.87
   8  -1  -3    0.21    0.81
   8   1  -3    0.07    0.75
  -8   1   3    0.19    0.84
  -7  -1   3    5.42    1.03
   7  -1  -3    4.45    0.98
  -7   1   3    6.12    1.08
   7   1  -3    4.58    0.98
   6  -1  -3    0.31    0.18
  -6  -1   3   -0.34    0.47
   6  -1  -3    0.21    0.20
   6  -1  -3    0.39    0.47
   6   1  -3    0.11    0.46
  -6   1   3    0.10    0.51
  -5  -1   3    1.83    0.51
   5  -1  -3    0.81    0.22
  -5   1   3    1.74    0.52
  -5   1   3    1.23    0.25
   4  -1  -3   11.09    0.89
  -4  -1   3   11.35    0.85
  -4  -1   3   10.33    0.44
   4  -1  -3   10.30    0.52
  -4   1   3   11.68    0.56
   4   1  -3   10.76    0.86
   4   1  -3   11.06    0.44
  -4   1   3   12.34    0.87
  -3  -1   3    0.20    0.11
  -3  -1   3    0.07    0.19
   3  -1  -3    0.23    0.13
   3  -1  -3   -0.04    0.23
  -3  -1   3    0.01    0.26
  -3   1   3    0.09    0.18
  -3   1   3    0.39    0.27
   3   1  -3    0.16    0.11
   3   1  -3    0.12    0.19
  -3   1   3    0.09    0.13
   3   1  -3    0.03    0.23
  -2  -1   3   28.50    1.16
  -2  -1   3   29.72    1.16
  -2  -1   3   31.28    0.95
   2  -1  -3   30.04    1.10
   2  -1  -3   30.51    1.00
  -2  -1   3   31.33    1.16
  -2   1   3   29.52    1.10
  -2   1   3   30.76    1.02
   2   1  -3   32.94    1.22
   2   1  -3   29.96    0.95
  -2   1   3   30.43    1.19
  -1  -1   3    5.45    0.31
   1  -1  -3    5.86    0.31
   1  -1  -3    5.83    0.36
  -1  -1   3    5.47    0.32
   1  -1  -3    5.60    0.27
  -1  -1   3    6.17    0.29
   1   1  -3    5.80    0.34
   1   1  -3    5.46    0.28
   1   1  -3    5.58    0.32
  -1   1   3    5.46    0.34
  -1   1   3    5.25    0.27
  -1   1   3    5.49    0.30
   0  -1  -3   45.87    1.36
   0  -1   3   47.22    1.37
   0  -1  -3   46.28    1.40
   0  -1  -3   48.25    1.26
   0  -1   3   48.40    1.39
   0   1   3   47.27    1.37
   0   1  -3   46.45    1.37
   0   1  -3   46.31    1.26
   0   1   3   46.85    1.40
   0   1  -3   47.82    1.39
   0   1   3   45.68    1.25
   1  -1   3   85.26    2.49
  -1  -1  -3   86.60    2.50
  -1  -1  -3   88.26    2.46
   1  -1   3   84.61    2.42
  -1  -1  -3   85.09    2.31
   1  -1   3   83.10    2.36
  -1   1  -3   85.95    2.37
  -1   1  -3   85.87    2.42
   1   1   3   84.73    2.50
   1   1   3   87.25    2.33
   1   1   3   85.34    2.45
  -1   1  -3   85.45    2.49
   2  -1   3    2.17    0.19
   2  -1   3    2.96    0.36
  -2  -1  -3    2.67    0.36
   2  -1   3    2.66    0.37
  -2  -1  -3    2.34    0.15
  -2  -1  -3    2.50    0.36
  -2   1  -3    2.66    0.37
   2   1   3    2.07    0.32
   2   1   3    2.35    0.36
  -2   1  -3    2.86    0.39
   2   1   3    2.25    0.15
  -2   1  -3    2.65    0.22
  -3  -1  -3    0.45    0.32
   3  -1   3    0.80    0.17
   3  -1   3    0.40    0.25
   3  -1   3    0.73    0.15
   3  -1   3    1.10    0.34
  -3  -1  -3    1.22    0.33
  -3   1  -3    0.86    0.28
   3   1   3    0.70    0.31
  -3   1  -3    0.37    0.31
   3   1   3    0.54    0.25
  -4  -1  -3    2.95    0.56
   4  -1   3    3.00    0.23
   4  -1   3    3.18    0.55
   4  -1   3    2.74    0.26
  -4   1  -3    2.63    0.50
   4   1   3    2.54    0.53
  -5  -1  -3    8.55    1.01
   5  -1   3    7.10    0.93
   5   1   3    9.32    1.08
  -5   1  -3    6.92    0.93
   6  -1   3    5.97    0.95
  -6  -1  -3    4.42    0.85
  -6   1  -3    8.30    1.13
   6   1   3    3.63    0.83
   7  -1   3    1.93    0.81
  -7  -1  -3    1.28    0.81
   7   1   3    2.11    0.85
  -7   1  -3    0.26    0.69
   8  -1   3    2.24    0.97
  -8  -1  -3    2.03    1.00
   8   1   3    3.37    1.05
  -8   1  -3    4.61    1.12
   9  -1   3    1.42    1.11
  -9  -1  -3    0.27    1.24
  -9   1  -3    0.38    1.10
   9   1   3   -0.96    1.05
   9  -2  -3   -1.14    1.12
  -9  -2   3    1.50    1.06
  -9   2   3    0.05    1.06
   9   2  -3    0.77    0.99
  -8  -2   3    0.40    0.79
   8  -2  -3    0.52    0.88
   8   2  -3    0.82    0.93
  -8   2   3    1.73    1.01
   7  -2  -3    6.09    0.46
  -7  -2   3    5.49    1.02
   7  -2  -3    6.19    1.12
   7  -2  -3    6.45    0.45
  -7   2   3    6.40    1.07
   7   2  -3    6.53    1.14
   6  -2  -3   13.49    0.74
   6  -2  -3   15.10    0.76
  -6  -2   3   14.28    1.28
   6  -2  -3   16.62    1.38
  -6   2   3   15.04    1.29
   6   2  -3   14.15    1.34
  -5  -2   3   13.38    0.46
   5  -2  -3   14.49    0.71
  -5  -2   3   15.94    1.33
   5  -2  -3   11.60    1.09
  -5   2   3   13.25    1.02
  -5   2   3   13.02    0.72
  -4  -2   3   13.85    0.55
  -4  -2   3   14.26    0.99
   4  -2  -3   13.84    1.00
   4  -2  -3   13.31    0.67
  -4   2   3   14.04    0.95
   4   2  -3   14.10    0.57
   4   2  -3   14.00    0.98
   3  -2  -3   30.07    1.39
  -3  -2   3   30.55    0.97
  -3  -2   3   30.72    1.36
  -3  -2   3   27.58    1.29
  -3  -2   3   29.82    1.34
   3  -2  -3   29.13    1.08
  -3   2   3   30.67    1.35
  -3   2   3   28.88    1.26
   3   2  -3   30.05    1.00
   3   2  -3   30.27    1.35
  -3   2   3   29.40    1.11
  -2  -2   3    2.16    0.33
  -2  -2   3    2.17    0.21
   2  -2  -3    2.21    0.28
   2  -2  -3    2.65    0.38
   2  -2  -3    2.54    0.32
  -2  -2   3    2.22    0.38
  -2   2   3    2.43    0.30
   2   2  -3    1.73    0.30
   2   2  -3    1.98    0.33
   2   2  -3    2.58    0.23
  -2   2   3    3.36    0.42
  -2   2   3    3.15    0.34
  -1  -2   3   53.37    1.61
   1  -2  -3   53.04    1.65
  -1  -2   3   53.95    1.59
   1  -2  -3   55.95    1.71
   1  -2  -3   53.02    1.54
  -1  -2   3   53.89    1.69
  -1   2   3   52.39    1.66
  -1   2   3   52.04    1.53
  -1   2   3   53.59    1.68
   1   2  -3   53.49    1.61
   1   2  -3   51.54    1.58
   1   2  -3   54.55    1.70
   0  -2   3  125.40    3.31
   0  -2  -3  118.18    3.26
   0  -2  -3  117.44    3.12
   0  -2  -3  116.10    3.27
   0  -2   3  117.73    3.27
   0   2  -3  118.17    3.27
   0   2  -3  118.70    3.29
   0   2   3  116.49    3.26
   0   2   3  113.43    3.27
   0   2   3  116.00    3.12
   1  -2   3   78.13    2.36
  -1  -2  -3   78.89    2.30
   1  -2   3   77.22    2.27
  -1  -2  -3   80.49    2.37
   1  -2   3   78.38    2.21
  -1  -2  -3   75.95    2.21
   1   2   3   77.73    2.22
  -1   2  -3   79.64    2.23
  -1   2  -3   80.73    2.37
   1   2   3   75.99    2.35
  -1   2  -3   75.62    2.27
  -2  -2  -3   22.24    0.73
   2  -2   3   21.83    0.83
   2  -2   3   21.61    0.98
  -2  -2  -3   20.94    1.01
   2  -2   3   21.85    0.94
  -2  -2  -3   20.68    0.96
  -2   2  -3   22.41    0.96
   2   2   3   21.44    0.97
   2   2   3   20.51    0.98
   2   2   3   21.39    0.74
  -2   2  -3   21.73    1.00
  -2   2  -3   20.61    0.83
   3  -2   3   53.05    1.65
   3  -2   3   52.67    2.00
  -3  -2  -3   50.52    2.20
   3  -2   3   51.58    1.66
  -3  -2  -3   51.76    1.44
   3  -2   3   52.18    1.96
  -3  -2  -3   50.23    1.97
   3   2   3   55.70    2.04
   3   2   3   50.10    1.95
  -3   2  -3   52.13    1.96
  -3   2  -3   53.93    2.01
  -4  -2  -3    8.37    0.77
   4  -2   3    7.66    0.73
   4  -2   3    8.29    0.47
   4  -2   3    7.64    0.50
   4   2   3    6.75    0.81
  -4   2  -3    8.15    0.81
   5  -2   3   11.19    1.00
   5  -2   3   10.94    0.54
  -5  -2  -3   12.61    1.08
   5  -2   3   10.35    0.57
   5   2   3   11.60    1.00
  -5   2  -3   10.62    1.01
   6  -2   3    0.32    0.19
  -6  -2  -3    0.92    0.58
   6  -2   3    0.46    0.60
   6  -2   3    0.12    0.17
   6   2   3    1.50    0.71
  -6   2  -3   -0.12    0.49
  -7  -2  -3    1.49    0.72
   7  -2   3    1.00    0.69
   7   2   3    1.79    0.72
  -7   2  -3    1.62    0.76
   8  -2   3    7.26    1.42
  -8  -2  -3    4.56    1.18
   8   2   3    4.41    1.18
  -8   2  -3    5.34    1.23
   9  -2   3   -0.76    1.04
  -9  -2  -3   -0.09    1.15
   9   2   3   -0.78    1.03
  -9   2  -3   -0.47    1.11
  -9  -3   3    2.74    1.21
   9  -3  -3    2.92    1.33
  -9   3   3    6.08    1.51
   9   3  -3    6.05    1.48
   8  -3  -3    2.73    1.12
  -8  -3   3    1.97    1.09
  -8   3   3    3.31    1.03
   8   3  -3    0.62    1.01
   7  -3  -3    1.52    0.78
   7  -3  -3    1.50    0.60
   7  -3  -3    2.26    0.46
  -7  -3   3    0.94    0.77
   7   3  -3    1.37    0.79
  -7   3   3    1.73    0.86
   6  -3  -3    0.09    0.33
  -6  -3   3   -0.11    0.50
   6  -3  -3    0.14    0.58
   6  -3  -3   -0.06    0.37
   6   3  -3    0.40    0.56
  -6   3   3    0.14    0.50
  -5  -3   3   10.38    0.45
   5  -3  -3   10.62    1.19
  -5  -3   3   11.42    1.01
  -5  -3   3    9.75    0.48
   5  -3  -3    9.70    0.69
  -5   3   3   10.50    0.72
   5   3  -3   10.70    1.17
  -5   3   3    8.25    0.95
  -4  -3   3    4.80    0.33
   4  -3  -3    2.84    0.58
  -4  -3   3    4.07    0.64
   4  -3  -3    4.44    0.54
   4   3  -3    5.18    0.73
  -4   3   3    4.44    0.59
   4   3  -3    4.77    0.38
  -4   3   3    4.96    0.48
  -3  -3   3  189.17    5.50
   3  -3  -3  185.32    5.17
   3  -3  -3  184.72    5.49
  -3  -3   3  187.31    4.99
  -3  -3   3  180.90    5.39
   3  -3  -3  181.32    5.27
  -3   3   3  182.94    5.40
  -3   3   3  178.41    5.28
  -3   3   3  186.72    5.21
   3   3  -3  187.57    5.03
   3   3  -3  185.24    5.41
  -2  -3   3   16.63    0.70
   2  -3  -3   16.45    0.87
   2  -3  -3   15.42    0.77
   2  -3  -3   16.39    0.75
  -2  -3   3   16.49    0.80
  -2  -3   3   16.10    0.84
  -2   3   3   15.10    0.76
   2   3  -3   16.65    0.80
   2   3  -3   16.60    0.72
   2   3  -3   18.72    0.89
  -2   3   3   15.00    0.82
  -2   3   3   16.26    0.76
   1  -3  -3  443.51   11.66
  -1  -3   3  445.93   11.61
  -1  -3   3  439.63   11.68
  -1  -3   3  436.11   11.48
   1  -3  -3  444.68   11.50
   1  -3  -3  440.35   11.66
  -1   3   3  432.68   11.63
  -1   3   3  439.31   11.48
  -1   3   3  456.12   12.11
   1   3  -3  446.29   11.62
   1   3  -3  456.06   11.48
   0  -3  -3    5.50    0.38
   0  -3  -3    5.11    0.38
   0  -3  -3    5.02    0.31
   0  -3   3    5.64    0.20
   0  -3   3    5.26    0.40
   0  -3   3    5.43    0.39
   0  -3   3    5.15    0.19
   0   3   3    5.53    0.38
   0   3  -3    6.21    0.41
   0   3   3    5.47    0.32
   0   3   3    6.22    0.40
   0   3  -3    4.70    0.37
  -1  -3  -3    1.36    0.21
   1  -3   3    1.20    0.17
  -1  -3  -3    1.60    0.23
   1  -3   3    1.73    0.30
   1  -3   3    1.38    0.27
  -1  -3  -3    1.78    0.30
   1   3   3    1.16    0.20
  -1   3  -3    1.35    0.24
  -1   3  -3    1.28    0.25
  -1   3  -3    0.98    0.17
   1   3   3    1.56    0.25
  -2  -3  -3   90.40    2.86
  -2  -3  -3   91.16    2.61
  -2  -3  -3   91.88    2.91
   2  -3   3   89.67    2.76
   2  -3   3   92.18    2.75
  -2  -3  -3   91.34    2.87
   2  -3   3   87.76    2.87
   2  -3   3   93.76    2.75
  -2   3  -3   90.69    2.90
   2   3   3   91.92    2.62
  -2   3  -3   89.99    2.76
   2   3   3   89.50    2.89
  -3  -3  -3    5.42    0.34
   3  -3   3    4.35    0.47
   3  -3   3    4.77    0.59
   3  -3   3    6.32    0.46
  -3  -3  -3    5.32    0.67
  -3   3  -3    4.52    0.58
  -3   3  -3    7.14    0.77
   3   3   3    5.97    0.60
  -4  -3  -3    2.24    0.18
  -4  -3  -3    2.38    0.51
   4  -3   3    2.59    0.40
   4  -3   3    2.76    0.57
  -4  -3  -3    2.30    0.18
   4  -3   3    2.05    0.31
   4   3   3    2.60    0.56
  -4   3  -3    2.09    0.50
  -5  -3  -3   15.16    1.23
   5  -3   3   14.47    0.81
   5  -3   3   13.79    0.74
   5  -3   3   15.58    1.22
  -5   3  -3   14.95    1.17
   5   3   3   10.79    1.06
   6  -3   3   12.88    0.77
  -6  -3  -3   13.89    1.47
   6  -3   3   12.87    1.21
   6   3   3   12.26    1.23
  -6   3  -3   14.36    1.39
  -7  -3  -3   -0.03    0.66
   7  -3   3    1.56    0.77
   7  -3   3   -0.27    0.26
   7  -3   3    0.00    0.23
   7   3   3    0.44    0.68
  -7   3  -3   -0.93    0.59
   8  -3   3    1.20    1.04
  -8  -3  -3   -0.32    0.87
   8   3   3    1.66    1.01
  -8   3  -3   -1.33    0.84
   9  -3   3    4.22    1.27
  -9   3  -3    2.34    1.38
  -9  -4   3    1.09    1.19
   9  -4  -3    0.02    1.14
  -9   4   3    0.22    1.22
   9   4  -3    1.56    1.11
  -8  -4   3   -1.44    0.85
   8  -4  -3   -1.19    0.93
   8  -4  -3    0.26    0.51
   8   4  -3    0.80    0.87
  -8   4   3   -0.14    0.86
   7  -4  -3   -0.06    0.44
   7  -4  -3    0.59    0.78
  -7  -4   3    0.41    0.72
  -7   4   3   -0.42    0.73
   7   4  -3    0.24    0.66
   6  -4  -3   19.83    1.53
  -6  -4   3   17.64    1.46
   6  -4  -3   16.57    1.04
   6   4  -3   16.31    1.38
  -6   4   3   15.36    1.35
  -5  -4   3   29.90    1.73
  -5  -4   3   29.67    1.10
   5  -4  -3   31.28    1.79
  -5  -4   3   29.63    1.05
   5   4  -3   30.20    1.69
  -5   4   3   30.97    1.62
  -5   4   3   31.08    1.39
   4  -4  -3    0.58    0.37
  -4  -4   3    1.55    0.50
   4  -4  -3    1.13    0.34
  -4  -4   3    0.67    0.26
  -4   4   3    0.81    0.38
   4   4  -3    0.61    0.34
  -4   4   3    0.76    0.31
  -3  -4   3   10.38    0.80
   3  -4  -3   11.56    0.73
   3  -4  -3   10.29    0.74
   3  -4  -3   11.64    0.82
  -3  -4   3   10.72    0.59
  -3   4   3    9.53    0.68
  -3   4   3   10.25    0.73
   3   4  -3   11.03    0.64
   3   4  -3   10.68    0.74
   2  -4  -3    5.27    0.49
  -2  -4   3    5.81    0.45
   2  -4  -3    6.19    0.49
   2  -4  -3    6.53    0.55
  -2  -4   3    6.19    0.57
  -2  -4   3    7.07    0.52
  -2   4   3    6.67    0.63
   2   4  -3    6.02    0.48
   2   4  -3    4.72    0.56
  -2   4   3    6.17    0.51
  -1  -4   3   24.78    0.90
   1  -4  -3   25.07    0.97
  -1  -4   3   26.26    1.08
   1  -4  -3   25.84    1.19
  -1   4   3   25.49    1.04
  -1   4   3   27.99    0.98
   1   4  -3   26.28    1.08
   1   4  -3   25.33    0.90
   1   4  -3   25.97    1.12
  -1   4   3   25.19    1.11
   0  -4   3  111.26    3.42
   0  -4   3  118.33    3.08
   0  -4  -3  117.78    3.44
   0  -4  -3  113.40    3.27
   0  -4   3  117.63    3.07
   0  -4  -3  115.65    3.38
   0  -4   3  115.23    3.45
   0   4  -3  113.64    3.44
   0   4  -3  117.09    3.46
   0   4   3  118.06    3.45
   0   4   3  118.51    3.29
   1  -4   3    6.89    0.52
  -1  -4  -3    7.86    0.53
  -1  -4  -3    6.35    0.48
  -1  -4  -3    6.25    0.47
   1  -4   3    6.92    0.39
   1   4   3    7.00    0.50
  -1   4  -3    5.71    0.49
   1   4   3    6.27    0.46
  -1   4  -3    6.27    0.35
  -2  -4  -3    5.24    0.43
   2  -4   3    4.76    0.46
  -2  -4  -3    4.85    0.57
   2  -4   3    5.10    0.48
  -2  -4  -3    5.16    0.57
   2  -4   3    3.95    0.44
  -2  -4  -3    4.61    0.57
   2  -4   3    5.49    0.62
  -2   4  -3    4.93    0.60
   2   4   3    4.21    0.51
  -2   4  -3    4.50    0.43
  -3  -4  -3   13.16    0.89
  -3  -4  -3   13.05    0.64
   3  -4   3   12.14    0.75
   3  -4   3   14.17    0.82
  -3  -4  -3   13.83    0.67
   3  -4   3   13.25    0.83
  -3   4  -3   12.96    0.90
  -3   4  -3   11.42    0.82
   3   4   3   13.15    0.90
   4  -4   3   13.50    1.00
  -4  -4  -3   13.91    0.61
   4  -4   3   13.38    0.86
  -4  -4  -3   13.98    0.61
   4  -4   3   13.42    0.81
  -4  -4  -3   14.14    1.09
   4   4   3   14.35    1.08
  -4   4  -3   14.32    1.06
   5  -4   3   15.14    0.87
  -5  -4  -3   18.37    1.34
   5  -4   3   13.92    0.91
   5  -4   3   14.74    1.22
  -5   4  -3   15.11    1.27
   5   4   3   15.69    1.27
   6  -4   3   -0.32    0.50
   6  -4   3   -0.42    0.47
   6  -4   3    0.01    0.32
  -6  -4  -3   -0.36    0.58
   6   4   3    0.12    0.58
  -6   4  -3    0.54    0.60
   7  -4   3    1.97    0.84
   7  -4   3    4.02    0.98
   7  -4   3    2.63    0.46
  -7  -4  -3    3.76    0.96
  -7   4  -3    1.61    0.82
   7   4   3    4.29    1.26
   8  -4   3    1.34    1.12
  -8  -4  -3    2.00    1.07
   8   4   3    1.57    0.99
  -8   4  -3    0.97    0.96
  -9  -4  -3    0.40    1.09
   9  -4   3    2.03    1.18
  -9   4  -3    1.41    1.58
   9   4   3    2.87    1.29
   9  -5  -3    2.03    1.33
  -9  -5   3   -1.12    1.27
   9   5  -3   -0.01    1.31
  -9   5   3    0.12    1.31
  -8  -5   3    0.39    1.04
   8  -5  -3    1.16    0.62
   8  -5  -3   -0.33    0.87
  -8   5   3    0.59    0.85
   8   5  -3    1.60    0.99
   7  -5  -3    1.42    0.91
   7  -5  -3    0.57    0.52
  -7  -5   3    0.51    0.73
  -7   5   3    0.56    0.76
   7   5  -3    0.33    0.82
   6  -5  -3    3.56    0.61
   6  -5  -3    4.10    0.90
  -6  -5   3    2.75    0.33
  -6  -5   3    2.38    0.75
  -6  -5   3    2.70    0.36
  -6   5   3    3.26    0.79
   6   5  -3    1.60    0.69
  -5  -5   3    1.15    0.57
   5  -5  -3    1.21    0.56
  -5  -5   3    0.96    0.28
  -5  -5   3    1.06    0.38
  -5   5   3    1.58    0.43
   5   5  -3    0.81    0.56
   4  -5  -3    4.60    0.79
  -4  -5   3    3.37    0.40
   4   5  -3    4.06    0.66
  -4   5   3    4.07    0.66
  -4   5   3    5.26    0.66
   3  -5  -3    3.17    0.55
  -3  -5   3    5.12    0.47
   3  -5  -3    4.98    0.62
  -3  -5   3    4.30    0.60
  -3  -5   3    6.45    0.55
   3   5  -3    4.49    0.65
   3   5  -3    5.02    0.60
  -3   5   3    5.76    0.65
  -3   5   3    6.26    0.69
   2  -5  -3    0.13    0.24
  -2  -5   3    0.66    0.25
  -2  -5   3    0.40    0.25
  -2  -5   3    0.22    0.26
   2  -5  -3    0.18    0.26
  -2   5   3   -0.04    0.20
   2   5  -3    0.20    0.22
   2   5  -3    0.32    0.27
  -2   5   3    0.21    0.28
  -2   5   3    0.54    0.24
   1  -5  -3   21.62    1.04
  -1  -5   3   19.05    0.96
  -1  -5   3   19.92    0.80
  -1  -5   3   19.87    0.98
   1  -5  -3   19.58    0.90
  -1  -5   3   20.28    1.03
   1  -5  -3   19.74    0.94
  -1   5   3   20.26    1.03
  -1   5   3   20.48    0.95
   1   5  -3   18.59    1.00
   1   5  -3   20.90    0.80
   0  -5   3   -0.23    0.19
   0  -5   3    0.09    0.12
   0  -5  -3    0.22    0.21
   0  -5   3    0.09    0.24
   0  -5  -3   -0.16    0.21
   0  -5   3    0.09    0.25
   0  -5  -3   -0.41    0.22
   0  -5   3   -0.10    0.10
   0  -5  -3    0.23    0.17
   0   5  -3    0.00    0.20
   0   5   3    0.06    0.18
   1  -5   3   23.52    0.89
  -1  -5  -3   24.43    1.08
   1  -5   3   21.87    1.12
   1  -5   3   23.67    1.13
   1  -5   3   25.08    1.18
  -1  -5  -3   24.74    1.23
  -1  -5  -3   23.57    1.10
  -1   5  -3   22.88    1.12
   1   5   3   24.54    1.10
   1   5   3   25.71    1.09
  -1   5  -3   23.98    0.86
   2  -5   3    2.88    0.52
  -2  -5  -3    4.02    0.48
   2  -5   3    3.35    0.46
  -2  -5  -3    3.95    0.54
  -2  -5  -3    3.52    0.53
  -2  -5  -3    4.01    0.54
  -2   5  -3    4.06    0.45
   2   5   3    3.83    0.52
  -2   5  -3    3.81    0.57
   2   5   3    4.16    0.49
   3  -5   3    0.15    0.23
  -3  -5  -3   -0.05    0.22
   3  -5   3    0.26    0.27
  -3  -5  -3   -0.23    0.26
  -3  -5  -3    0.34    0.33
  -3   5  -3    0.32    0.33
  -3   5  -3    0.27    0.33
   3   5   3    0.74    0.36
   4  -5   3    1.75    0.55
   4  -5   3    2.55    0.48
  -4  -5  -3    2.31    0.34
  -4  -5  -3    1.74    0.33
   4   5   3    1.44    0.47
  -4   5  -3    3.11    0.80
  -5  -5  -3    0.89    0.24
   5  -5   3    1.51    0.44
   5  -5   3   -0.23    0.41
  -5  -5  -3    0.50    0.22
  -5  -5  -3    0.60    0.51
  -5   5  -3    0.42    0.57
   5   5   3    0.12    0.46
  -6  -5  -3    4.56    0.95
   6  -5   3    9.50    1.21
   6  -5   3    7.63    0.77
  -6   5  -3    5.77    1.09
   6   5   3    9.27    1.24
   7  -5   3   17.70    1.61
   7  -5   3   15.74    1.06
  -7  -5  -3   18.73    1.74
  -7   5  -3   19.94    1.77
   7   5   3   17.16    1.67
   8  -5   3    3.72    1.25
  -8  -5  -3    0.97    1.17
  -8   5  -3   -1.56    1.06
   8   5   3    0.71    0.98
  -9  -5  -3    4.32    1.55
   9  -5   3    4.41    1.39
   9   5   3    2.85    1.43
  -9   5  -3    4.62    1.64
  -9  -6   3    0.10    1.26
  -9   6   3    1.07    1.44
   8  -6  -3   -0.30    0.94
  -8  -6   3    2.51    1.14
   8  -6  -3    0.75    0.86
   8   6  -3    1.48    1.14
  -8   6   3    0.57    1.00
   7  -6  -3    0.54    0.93
  -7  -6   3    0.55    0.91
   7   6  -3    0.67    0.82
  -7   6   3    1.07    0.73
  -6  -6   3    3.90    0.88
  -6  -6   3    2.95    0.42
   6  -6  -3    3.43    0.72
  -6  -6   3    2.97    0.51
   6  -6  -3    3.99    0.94
   6   6  -3    5.45    1.03
  -6   6   3    3.50    0.83
   5  -6  -3    6.85    1.03
  -5  -6   3    6.01    0.59
  -5  -6   3    6.27    1.03
  -5  -6   3    6.03    0.69
   5   6  -3    5.56    0.92
  -5   6   3    6.87    0.97
   4  -6  -3    1.69    0.53
  -4  -6   3    0.86    0.31
  -4  -6   3    1.85    0.52
  -4  -6   3    1.74    0.46
   4   6  -3    2.00    0.55
  -4   6   3    2.06    0.47
  -4   6   3    1.49    0.45
   3  -6  -3    0.24    0.36
  -3  -6   3    1.34    0.35
  -3  -6   3    1.41    0.47
   3   6  -3    1.58    0.43
  -3   6   3    1.15    0.40
   3   6  -3    0.54    0.31
  -3   6   3    1.24    0.40
  -2  -6   3    6.32    0.57
   2  -6  -3    6.37    0.70
   2  -6  -3    7.07    0.64
  -2  -6   3    6.52    0.59
   2   6  -3    6.15    0.75
  -2   6   3    6.91    0.71
   2   6  -3    6.44    0.55
  -2   6   3    6.64    0.78
  -2   6   3    6.27    0.55
  -1  -6   3    0.23    0.20
   1  -6  -3    0.40    0.24
  -1  -6   3    0.51    0.26
  -1   6   3    0.20    0.21
  -1   6   3   -0.12    0.23
  -1   6   3    0.58    0.29
   1   6  -3    0.39    0.26
   0  -6   3   28.00    1.32
   0  -6   3   28.75    0.98
   0  -6  -3   29.79    1.25
   0  -6  -3   29.19    1.24
   0  -6   3   29.12    0.99
   0   6   3   29.05    1.34
   0   6  -3   28.18    1.33
   0   6   3   27.58    1.20
  -1  -6  -3   27.81    1.26
   1  -6   3   26.95    1.31
  -1  -6  -3   27.05    1.24
   1  -6   3   27.46    1.03
  -1  -6  -3   28.06    1.27
  -1   6  -3   27.10    1.29
   1   6   3   27.85    1.29
   1   6   3   28.26    1.24
  -1   6  -3   27.78    0.99
   2  -6   3   32.78    1.54
   2  -6   3   34.14    1.34
  -2  -6  -3   34.87    1.47
   2   6   3   33.72    1.52
  -2   6  -3   34.97    1.31
  -2   6  -3   34.19    1.58
   2   6   3   34.91    1.54
   2   6   3   33.88    1.44
   3  -6   3   -0.01    0.30
  -3  -6  -3    0.26    0.27
   3  -6   3    0.04    0.32
  -3  -6  -3    0.51    0.43
  -3  -6  -3    0.31    0.34
   3   6   3    0.42    0.35
  -3   6  -3    0.05    0.36
  -3   6  -3    0.07    0.33
   4  -6   3    1.39    0.45
  -4  -6  -3    1.29    0.55
  -4  -6  -3    1.46    0.34
  -4  -6  -3    1.35    0.41
   4  -6   3    0.92    0.48
  -4   6  -3    1.40    0.52
   4   6   3    0.25    0.41
   5  -6   3   51.25    2.36
   5  -6   3   48.78    2.04
  -5  -6  -3   49.16    1.69
  -5  -6  -3   49.15    1.68
  -5  -6  -3   51.37    2.48
  -5   6  -3   49.20    2.41
   5   6   3   49.62    2.42
   6  -6   3    4.37    0.97
   6  -6   3    4.00    0.66
  -6  -6  -3    5.20    1.01
   6   6   3    5.49    0.96
  -6   6  -3    5.01    1.08
   7  -6   3    3.86    1.01
   7  -6   3    3.12    0.71
  -7  -6  -3    3.51    1.03
   7   6   3    4.68    1.07
  -7   6  -3    5.42    1.25
   8  -6   3    2.52    1.03
  -8  -6  -3    0.51    0.98
   8   6   3   -1.25    0.97
  -8   6  -3   -2.10    1.09
  -9  -6  -3    3.55    1.48
   9   6   3    2.85    1.66
  -9   6  -3    2.54    1.64
  -9  -7   3    5.97    1.70
   9  -7  -3    6.14    1.65
  -9   7   3    7.73    1.74
   9   7  -3    7.88    1.66
  -8  -7   3    1.61    1.18
   8  -7  -3    0.85    0.86
   8  -7  -3   -0.81    1.15
  -8   7   3    1.18    1.18
   8   7  -3    3.05    1.13
   7  -7  -3    1.68    0.73
   7  -7  -3    2.00    0.97
  -7  -7   3    2.27    1.13
   7   7  -3    2.55    1.02
  -7   7   3    1.28    0.93
  -6  -7   3    0.21    0.36
   6  -7  -3    0.40    0.57
  -6  -7   3    1.03    0.83
   6  -7  -3   -0.52    0.69
  -6  -7   3    0.47    0.59
  -6   7   3   -0.11    0.67
   6   7  -3    0.32    0.70
   5  -7  -3    7.32    1.14
  -5  -7   3    6.99    1.09
   5  -7  -3    7.00    0.90
  -5  -7   3    7.62    0.69
  -5   7   3    8.97    1.06
   5   7  -3    6.60    0.97
  -4  -7   3    0.67    0.51
  -4  -7   3    0.26    0.35
   4  -7  -3    1.00    0.49
   4   7  -3    1.50    0.52
  -4   7   3    1.10    0.49
  -4   7   3    0.82    0.46
   3  -7  -3    5.79    0.81
  -3  -7   3    5.81    0.71
  -3   7   3    4.97    0.67
   3   7  -3    5.31    0.79
  -3   7   3    6.37    0.82
   3   7  -3    5.92    0.67
  -2  -7   3    0.67    0.33
   2  -7  -3    0.23    0.31
   2  -7  -3    0.50    0.45
  -2  -7   3    0.24    0.37
  -2   7   3    0.90    0.37
   2   7  -3    1.46    0.40
  -2   7   3    0.04    0.28
   2   7  -3    0.91    0.29
   1  -7  -3    2.34    0.43
  -1  -7   3    2.62    0.47
   1  -7  -3    3.30    0.53
  -1  -7   3    3.20    0.38
  -1  -7   3    3.17    0.41
   1   7  -3    3.73    0.60
  -1   7   3    2.23    0.45
  -1   7   3    3.62    0.61
  -1   7   3    2.25    0.43
   0  -7  -3   50.65    1.94
   0  -7   3   54.38    2.13
   0  -7  -3   53.57    1.95
   0  -7  -3   51.07    1.92
   0  -7   3   54.10    1.66
   0  -7   3   51.15    1.65
   0   7  -3   53.19    2.09
   0   7   3   54.04    2.13
   0   7   3   50.62    1.93
  -1  -7  -3   20.72    1.15
   1  -7   3   22.45    1.26
   1  -7   3   21.96    0.92
  -1  -7  -3   24.20    1.17
   1   7   3   24.97    1.20
  -1   7  -3   22.67    1.23
   1   7   3   23.31    1.25
  -1   7  -3   21.96    0.90
  -2  -7  -3    3.70    0.58
   2  -7   3    4.22    0.54
   2  -7   3    4.14    0.63
  -2   7  -3    4.23    0.63
   2   7   3    5.15    0.70
  -2   7  -3    4.41    0.50
   2   7   3    4.72    0.65
   3  -7   3    7.65    0.81
   3  -7   3    7.30    0.85
  -3  -7  -3    6.27    0.72
  -3  -7  -3    6.70    0.86
  -3   7  -3    5.52    0.68
   3   7   3    7.17    0.83
  -3   7  -3    5.87    0.92
  -4  -7  -3   16.84    1.35
   4  -7   3   15.62    1.16
  -4  -7  -3   14.52    0.95
   4   7   3   15.87    1.21
  -4   7  -3   17.77    1.26
  -5  -7  -3    4.10    0.55
  -5  -7  -3    3.06    0.58
   5  -7   3    3.26    0.80
  -5  -7  -3    1.83    0.70
   5  -7   3    4.47    0.73
   5   7   3    3.76    0.74
  -5   7  -3    4.03    0.96
  -6  -7  -3    3.45    0.64
   6  -7   3    3.49    0.75
  -6  -7  -3    3.79    1.00
   6  -7   3    3.91    0.91
   6   7   3    2.48    0.80
  -6   7  -3    4.54    1.03
   7  -7   3    5.35    0.87
   7  -7   3    4.19    1.09
  -7  -7  -3    6.01    1.22
  -7   7  -3    5.65    1.28
   7   7   3    4.86    1.22
   8  -7   3    1.01    1.13
  -8  -7  -3    2.39    1.19
  -8   7  -3    2.39    1.35
   8   7   3    2.48    1.15
   8  -8  -3    5.68    1.21
   8  -8  -3    2.92    1.17
  -8  -8   3    5.09    1.66
   8   8  -3    5.29    1.38
  -8   8   3    3.58    1.40
  -7  -8   3    0.79    1.02
   7  -8  -3    0.43    0.83
   7  -8  -3    0.11    1.01
   7   8  -3    0.59    0.99
  -7   8   3    1.52    1.17
   6  -8  -3    2.84    0.98
  -6  -8   3    2.41    0.92
  -6  -8   3    2.61    0.58
   6  -8  -3    4.93    0.94
  -6   8   3    6.04    1.13
   6   8  -3    4.77    1.02
   5  -8  -3    5.71    1.02
   5  -8  -3    4.35    0.82
  -5  -8   3    3.85    0.89
  -5  -8   3    5.35    0.70
  -5   8   3    6.81    0.95
   5   8  -3    3.04    0.79
  -4  -8   3    2.17    0.65
   4  -8  -3    2.16    0.67
  -4  -8   3    2.17    0.53
   4   8  -3    2.37    0.61
   3  -8  -3    2.12    0.55
  -3  -8   3    2.58    0.56
   3   8  -3    3.31    0.57
  -3   8   3    2.50    0.65
   3   8  -3    1.62    0.54
  -3   8   3    3.36    0.62
  -2  -8   3   22.43    1.32
   2  -8  -3   25.32    1.31
  -2  -8   3   24.04    1.20
   2   8  -3   23.73    1.14
   2   8  -3   22.76    1.41
  -2   8   3   22.20    1.37
  -2   8   3   23.41    1.24
  -1  -8   3   16.51    1.10
  -1  -8   3   15.70    0.80
   1  -8  -3   14.55    0.96
  -1  -8   3   15.87    0.83
   1   8  -3   16.92    1.16
  -1   8   3   15.59    1.27
  -1   8   3   14.20    0.94
   0  -8   3    7.64    0.99
   0  -8   3    8.78    0.56
   0  -8  -3    7.37    0.68
   0  -8   3    8.02    0.52
   0   8  -3    8.96    0.84
   0   8   3    9.28    0.75
   0   8   3    7.16    0.86
  -1  -8  -3   -0.27    0.32
   1  -8   3    0.03    0.24
   1  -8   3   -0.02    0.31
   1   8   3   -0.15    0.34
  -1   8  -3    0.43    0.34
   2  -8   3   33.79    1.69
   2  -8   3   30.63    1.33
  -2  -8  -3   30.95    1.58
  -2  -8  -3   30.76    1.55
   2   8   3   31.53    1.60
  -2   8  -3   30.68    1.34
  -2   8  -3   30.08    1.59
   3  -8   3    0.21    0.37
   3  -8   3   -0.01    0.41
  -3  -8  -3   -0.04    0.45
  -3  -8  -3    0.26    0.40
   3   8   3    0.48    0.46
  -3   8  -3   -0.09    0.38
   4  -8   3   -0.47    0.44
   4  -8   3   -0.51    0.47
  -4  -8  -3    0.46    0.55
  -4  -8  -3    0.12    0.39
  -4   8  -3   -0.29    0.47
   4   8   3   -0.30    0.46
   5  -8   3    0.14    0.53
  -5  -8  -3    0.78    0.46
   5  -8   3   -0.44    0.56
  -5  -8  -3    0.59    0.65
   5   8   3   -0.22    0.53
  -5   8  -3   -0.47    0.59
  -6  -8  -3    6.77    0.68
  -6  -8  -3    5.47    1.22
   6  -8   3    7.28    1.17
   6  -8   3    7.84    1.01
  -6   8  -3    6.64    1.42
   6   8   3    5.73    1.15
  -7  -8  -3   -0.54    1.13
   7  -8   3    0.80    1.13
   7  -8   3   -1.48    0.70
   7   8   3   -0.43    0.92
  -7   8  -3    0.96    1.10
   8  -8   3    5.60    1.48
  -8  -8  -3    5.32    1.71
  -8   8  -3    4.80    1.52
   8   8   3    8.18    1.71
  -8  -9   3    8.17    1.87
   8  -9  -3    7.94    1.39
   8  -9  -3    3.37    1.50
   8   9  -3    6.08    1.63
  -8   9   3    6.81    1.55
   7  -9  -3   -2.03    0.91
  -7  -9   3    0.83    1.26
   7  -9  -3   -1.30    1.06
   7   9  -3    0.74    1.03
  -7   9   3    2.01    1.09
  -6  -9   3   15.78    1.13
   6  -9  -3   15.00    1.46
  -6  -9   3   15.09    1.82
   6  -9  -3   13.55    1.60
   6   9  -3   15.14    1.60
  -6   9   3   15.84    1.63
   5  -9  -3   -0.29    0.66
  -5  -9   3   -0.49    0.51
  -5  -9   3   -0.17    0.67
   5  -9  -3   -0.72    0.67
  -5   9   3    0.35    0.64
   5   9  -3    0.19    0.66
   4  -9  -3    5.76    0.99
  -4  -9   3    7.63    0.88
   4  -9  -3    6.75    1.02
  -4   9   3    7.20    0.98
   3  -9  -3    1.18    0.60
  -3  -9   3    2.04    0.59
   3   9  -3    1.97    0.64
   3   9  -3    1.79    0.51
  -3   9   3    1.51    0.47
  -2  -9   3    1.68    0.52
  -2  -9   3    0.99    0.40
   2  -9  -3    1.31    0.46
  -2  -9   3    1.05    0.53
   2   9  -3    1.66    0.57
  -2   9   3    1.98    0.54
  -1  -9   3    5.33    0.61
  -1  -9   3    7.72    0.92
  -1  -9   3    7.57    0.60
   1  -9  -3    6.95    0.77
   1   9  -3    5.99    0.82
  -1   9   3    7.20    0.81
   0  -9   3    0.45    0.42
   0  -9   3    1.63    0.37
   0  -9  -3    2.20    0.48
   0   9  -3    0.99    0.51
   0   9   3    1.40    0.47
   1  -9   3    0.21    0.29
  -1  -9  -3    0.49    0.35
   1  -9   3   -0.19    0.39
  -1  -9  -3    0.61    0.43
   1  -9   3    0.12    0.30
  -1   9  -3    0.01    0.46
   1   9   3   -0.77    0.36
   2  -9   3   32.80    1.43
  -2  -9  -3   36.99    1.78
  -2  -9  -3   32.01    1.65
   2  -9   3   34.05    1.79
  -2   9  -3   35.47    1.80
  -2   9  -3   31.51    1.37
   2   9   3   34.83    2.02
  -3  -9  -3    4.90    0.81
   3  -9   3    4.84    0.70
   3  -9   3    4.30    0.84
  -3  -9  -3    4.27    0.83
   3   9   3    3.67    0.70
  -3   9  -3    2.78    0.68
   4  -9   3    0.43    0.59
  -4  -9  -3    0.27    0.61
   4  -9   3   -0.46    0.52
   4   9   3    0.73    0.61
  -4   9  -3    0.45    0.61
  -5  -9  -3    0.33    0.72
  -5  -9  -3    0.25    0.52
   5  -9   3    0.10    0.65
   5  -9   3    0.40    0.65
  -5   9  -3    0.00    0.74
   5   9   3   -0.37    0.63
  -6  -9  -3    0.10    0.96
   6  -9   3   -0.16    0.71
   6  -9   3    1.72    0.90
  -6  -9  -3    1.25    0.57
  -6   9  -3    0.85    0.84
   6   9   3   -0.16    0.90
   7  -9   3   -2.17    1.01
   7  -9   3   -1.30    0.84
  -7  -9  -3   -0.98    1.21
   7   9   3   -0.57    0.91
  -7   9  -3    1.15    1.01
  -8  -9  -3   -1.06    1.31
   8  -9   3   -0.07    1.32
  -8   9  -3   -2.27    1.52
   8   9   3    0.53    1.27
  -7 -10   3   -0.28    1.28
   7 -10  -3    0.45    1.00
   7 -10  -3   -1.45    1.11
  -7  10   3    0.30    1.14
   7  10  -3   -0.30    1.12
  -6 -10   3   -0.68    0.91
   6 -10  -3   -0.65    0.93
  -6 -10   3    2.23    0.77
   6 -10  -3    4.02    1.15
   6  10  -3    2.24    0.94
  -6  10   3    1.84    0.93
   5 -10  -3    1.38    0.82
  -5 -10   3    2.52    0.69
  -5 -10   3    1.93    0.84
   5 -10  -3    3.21    0.97
   5  10  -3    2.29    0.80
  -5  10   3    1.50    0.79
   4 -10  -3    1.17    0.74
  -4 -10   3    0.31    0.54
   4 -10  -3    1.03    0.73
   4  10  -3    0.43    0.58
  -4  10   3    2.15    0.70
   3 -10  -3   17.59    1.48
  -3 -10   3   15.92    1.26
  -3  10   3   15.01    1.20
   3  10  -3   15.51    1.34
   3  10  -3   13.23    1.07
   2 -10  -3    9.66    1.21
  -2 -10   3    8.21    0.99
  -2 -10   3    6.64    0.94
   2 -10  -3    8.99    1.02
  -2 -10   3    8.16    0.78
   2  10  -3    8.07    1.06
  -2  10   3    7.89    0.95
  -1 -10   3   -0.07    0.32
  -1 -10   3    0.22    0.67
  -1 -10   3    0.88    0.52
   1 -10  -3    0.70    0.44
   1 -10  -3    0.82    0.54
  -1  10   3   -0.55    0.38
   1  10  -3    0.46    0.50
   0 -10   3    1.76    0.38
   0 -10  -3    0.25    0.41
   0 -10   3    0.93    0.49
   0 -10  -3    1.62    0.58
   0 -10   3    0.80    0.41
   0  10  -3    0.84    0.56
   0  10   3    0.93    0.49
  -1 -10  -3    2.49    0.65
   1 -10   3    2.46    0.46
   1 -10   3    2.55    0.65
  -1 -10  -3    2.75    0.58
   1 -10   3    2.98    0.49
  -1  10  -3    2.80    0.71
   1  10   3    2.63    0.63
   2 -10   3    1.92    0.46
  -2 -10  -3    1.28    0.59
   2 -10   3    1.22    0.57
  -2 -10  -3    1.12    0.60
   2  10   3    1.60    0.59
  -2  10  -3    1.90    0.52
  -2  10  -3    1.96    0.65
  -3 -10  -3    1.82    0.64
   3 -10   3    1.87    0.57
  -3 -10  -3    1.50    0.54
  -3 -10  -3   -0.14    0.64
   3 -10   3    0.50    0.63
  -3  10  -3    1.62    0.63
  -4 -10  -3    1.08    0.60
   4 -10   3    3.07    0.77
  -4 -10  -3    2.23    0.92
   4 -10   3    2.66    0.82
  -4  10  -3    2.25    0.83
   4  10   3    0.44    0.68
   5 -10   3   -0.11    0.75
  -5 -10  -3    2.06    0.87
  -5 -10  -3    0.72    0.62
   5 -10   3    1.84    0.80
   5  10   3   -0.87    0.78
  -5  10  -3   -0.01    0.85
   6 -10   3    1.44    1.00
  -6 -10  -3    0.98    1.01
   6 -10   3    0.00    0.84
  -6  10  -3   -0.29    0.85
   6  10   3   -1.00    0.95
   7 -10   3   -1.65    1.16
   7 -10   3    1.17    0.96
  -7 -10  -3    1.52    1.42
   7  10   3    0.42    1.03
  -7  10  -3   -0.27    1.24
  -7 -11   3   -0.12    1.32
   7 -11  -3    0.28    1.41
   7 -11  -3    0.33    1.24
   7  11  -3    0.55    1.29
  -7  11   3   -0.72    1.28
   6 -11  -3    0.84    1.02
  -6 -11   3    0.02    1.17
   6 -11  -3    0.17    1.14
  -6 -11   3   -0.51    0.77
  -6  11   3    0.28    1.02
  -5 -11   3   11.59    1.69
   5 -11  -3   11.05    1.49
  -5 -11   3   10.87    1.21
   5 -11  -3    8.20    1.31
  -5  11   3   10.55    1.38
   5  11  -3   10.23    1.35
   4 -11  -3    4.19    0.98
  -4 -11   3    6.35    0.97
   4  11  -3    4.16    0.87
  -4  11   3    4.86    0.93
  -3 -11   3    2.39    0.69
   3 -11  -3    4.66    0.93
   3 -11  -3    3.77    0.93
  -3 -11   3    3.38    0.78
  -3  11   3    2.81    0.73
   3  11  -3    2.84    0.85
   2 -11  -3   15.25    1.63
  -2 -11   3   14.24    1.46
   2 -11  -3   13.13    1.18
  -2 -11   3   13.61    1.02
   2  11  -3   15.64    1.44
  -2  11   3   15.74    1.24
   1 -11  -3   -0.03    0.65
  -1 -11   3    0.61    0.39
   1 -11  -3    0.52    0.54
  -1 -11   3    0.22    0.57
  -1 -11   3    0.37    0.55
  -1  11   3    1.11    0.58
   1  11  -3    0.53    0.55
   0 -11   3    0.98    0.56
   0 -11  -3    1.24    0.70
   0 -11   3    1.97    0.44
   0 -11  -3    1.71    0.59
   0 -11   3    1.04    0.48
   0  11   3    1.67    0.60
   0  11  -3    1.20    0.67
   1 -11   3    0.44    0.39
  -1 -11  -3    0.19    0.49
  -1 -11  -3    0.37    0.55
   1 -11   3   -0.09    0.47
   1 -11   3    0.34    0.55
  -1  11  -3   -0.28    0.47
   1  11   3    0.69    0.56
   2 -11   3    0.12    0.53
   2 -11   3    0.13    0.45
  -2 -11  -3   -0.73    0.56
   2 -11   3   -0.45    0.53
  -2 -11  -3   -0.28    0.54
   2  11   3   -0.20    0.58
  -2  11  -3    0.04    0.58
   3 -11   3   20.86    1.35
  -3 -11  -3   18.81    1.51
  -3 -11  -3   21.42    1.55
   3 -11   3   22.31    1.69
  -3 -11  -3   19.79    1.66
  -3  11  -3   18.50    1.56
  -4 -11  -3    5.90    0.99
  -4 -11  -3    3.44    1.04
   4 -11   3    4.07    0.93
  -4  11  -3    4.26    0.94
   5 -11   3   13.69    1.60
   5 -11   3   13.65    1.45
  -5 -11  -3   13.54    1.78
  -5 -11  -3   12.14    1.31
   5  11   3   13.81    1.55
  -5  11  -3   12.90    1.58
  -6 -11  -3    3.60    1.38
   6 -11   3    3.56    1.23
  -6 -11  -3    3.47    0.95
   6 -11   3    3.75    1.20
  -6  11  -3    5.67    1.37
   6  11   3    2.32    1.19
  -7 -11  -3   -2.63    1.32
   7 -11   3   -0.12    1.19
   7 -11   3   -0.34    1.37
  -7  11  -3   -0.24    1.30
   7  11   3    0.79    1.30
   6 -12  -3    0.98    1.14
  -6 -12   3    2.98    1.37
  -6 -12   3    1.23    1.00
   6 -12  -3    0.54    1.18
  -6  12   3    0.25    1.19
   6  12  -3    1.43    1.15
  -5 -12   3    0.56    1.01
  -5 -12   3   -0.79    0.79
   5 -12  -3    1.22    1.05
   5 -12  -3   -0.11    0.95
   5  12  -3    0.10    0.98
  -5  12   3   -0.35    0.94
  -4 -12   3    1.65    0.84
   4 -12  -3    1.05    0.97
   4 -12  -3    0.14    0.89
  -4 -12   3    0.88    0.75
  -4  12   3    0.69    0.76
   3 -12  -3   -0.16    0.70
  -3 -12   3    0.62    0.74
   3 -12  -3   -0.23    0.71
  -3 -12   3    1.23    0.66
  -3  12   3    1.02    0.77
   3  12  -3    0.42    0.94
   2 -12  -3    0.44    0.84
  -2 -12   3    0.85    0.57
   2 -12  -3    1.30    0.68
  -2 -12   3    2.29    0.87
  -2  12   3    0.38    0.63
   2  12  -3    1.32    0.74
  -1 -12   3   -0.31    0.63
  -1 -12   3    0.42    0.64
   1 -12  -3    0.56    0.65
   1 -12  -3    0.29    0.78
  -1 -12   3    0.01    0.45
   1  12  -3    0.75    0.73
  -1  12   3   -0.02    0.59
   0 -12   3    5.25    0.62
   0 -12   3    3.90    0.94
   0 -12  -3    4.16    1.00
   0  12  -3    5.79    1.06
   0  12   3    5.32    0.97
  -1 -12  -3    0.01    0.59
  -1 -12  -3   -0.23    0.64
   1 -12   3    0.41    0.46
   1  12   3    0.75    0.68
  -1  12  -3    2.09    0.74
   2 -12   3    0.01    0.55
  -2 -12  -3    0.42    0.77
   2 -12   3    0.24    0.75
  -2 -12  -3   -0.07    0.66
   2  12   3    0.58    0.71
  -2  12  -3   -0.40    0.71
   3 -12   3    1.44    0.66
   3 -12   3    0.09    0.65
  -3 -12  -3    0.59    0.75
  -3 -12  -3    0.93    0.73
  -3 -12  -3    1.10    0.77
  -3  12  -3    0.24    0.81
  -4 -12  -3    2.97    1.07
   4 -12   3    4.14    1.17
  -4 -12  -3    4.44    1.06
  -4 -12  -3    4.18    1.09
  -4  12  -3    1.86    1.00
   5 -12   3   -2.22    0.95
  -5 -12  -3    0.65    1.13
   5 -12   3    1.72    1.08
  -5 -12  -3    0.24    0.85
  -5  12  -3    0.44    1.11
  -6 -12  -3   -1.53    1.38
   6 -12   3    5.45    1.41
   6 -12   3    3.94    1.25
   6  12   3    0.96    1.25
  -6  12  -3    5.58    1.54
   6 -13  -3   -0.58    1.44
   6 -13  -3   -0.22    1.41
  -6 -13   3    0.28    1.42
  -6 -13   3    1.84    1.11
  -6  13   3    0.44    1.45
   6  13  -3   -0.35    1.33
  -5 -13   3   -1.11    1.06
  -5 -13   3   -1.30    0.97
  -5 -13   3    0.56    1.31
   5 -13  -3    1.93    1.18
   5 -13  -3   -0.78    1.22
  -5  13   3    1.83    1.08
  -4 -13   3    0.68    0.97
  -4 -13   3   -0.26    0.90
   4 -13  -3    0.98    1.01
   4 -13  -3    0.09    0.93
  -4  13   3    1.50    1.07
  -3 -13   3    1.11    0.90
   3 -13  -3    2.51    0.94
   3 -13  -3    1.25    0.89
   3  13  -3    1.70    0.96
  -3  13   3    1.06    0.97
   2 -13  -3    0.21    0.73
  -2 -13   3   -0.17    0.64
   2 -13  -3    1.90    1.04
  -2 -13   3    1.88    0.87
  -2  13   3    0.35    0.84
   2  13  -3    1.27    0.94
  -1 -13   3    2.58    0.91
   1 -13  -3    2.43    0.93
   1 -13  -3    1.44    0.76
  -1 -13   3    3.65    0.63
  -1  13   3    3.59    0.90
   0 -13  -3    5.04    0.86
   0 -13   3    3.29    0.60
   0 -13   3    5.18    1.16
   0 -13  -3    4.05    1.02
   0  13  -3    4.55    1.02
   0  13   3    4.22    0.96
   1 -13   3    5.07    0.69
  -1 -13  -3    5.00    1.09
   1 -13   3    4.16    0.99
  -1 -13  -3    4.66    0.90
   1  13   3    4.89    1.04
  -1  13  -3    4.30    1.03
   2 -13   3   11.27    1.06
   2 -13   3    8.63    1.41
  -2 -13  -3   10.59    1.34
  -2 -13  -3   12.68    1.36
   2  13   3   11.15    1.48
   3 -13   3    4.12    0.85
  -3 -13  -3    3.58    1.19
   3 -13   3    4.23    1.14
  -3 -13  -3    6.33    1.13
  -3 -13  -3    2.98    0.97
  -3  13  -3    3.43    1.15
  -4 -13  -3    2.44    1.08
  -4 -13  -3    3.90    1.04
   4 -13   3    3.55    1.12
  -4 -13  -3    4.79    1.21
  -4  13  -3    3.38    1.09
  -5 -13  -3    0.01    1.14
   5 -13   3    0.58    1.17
  -5 -13  -3    0.29    1.30
  -5 -13  -3    2.09    1.10
  -5  13  -3    2.17    1.26
  -5 -14   3   -0.29    1.19
   5 -14  -3    1.12    1.35
  -5 -14   3   -1.79    1.41
   5 -14  -3   -0.65    1.43
  -5  14   3   -1.46    1.40
   4 -14  -3    1.03    1.26
   4 -14  -3    0.43    1.20
  -4 -14   3    2.17    1.08
  -4  14   3    0.63    1.09
  -3 -14   3    2.06    1.10
   3 -14  -3    4.59    1.27
   3 -14  -3    1.91    1.04
  -3  14   3    3.49    1.32
   3  14  -3    2.20    1.19
  -2 -14   3    0.45    0.94
   2 -14  -3   -0.43    0.90
   2 -14  -3    0.03    0.91
  -2  14   3    0.11    0.94
   2  14  -3    0.80    1.01
   1 -14  -3    7.05    1.33
   1 -14  -3    7.57    1.12
  -1 -14   3   10.22    1.49
  -1  14   3    7.76    1.31
   1  14  -3    6.17    1.38
   0 -14   3   -0.98    0.89
   0 -14  -3    1.38    0.96
   0 -14  -3    0.07    0.80
   0  14  -3    0.29    0.97
   0  14   3    0.49    0.94
   1 -14   3    3.31    1.09
  -1 -14  -3    3.57    0.96
  -1 -14  -3    4.00    1.21
  -1  14  -3    2.89    1.03
   1  14   3    2.74    1.07
  -2 -14  -3    0.48    0.87
   2 -14   3   -0.35    0.89
  -2 -14  -3    1.40    1.01
   2  14   3    0.67    1.02
  -2  14  -3    0.41    1.02
  -3 -14  -3   -0.53    1.03
   3 -14   3   -0.30    0.94
  -3 -14  -3    0.14    1.18
  -3 -14  -3   -0.04    1.00
  -3  14  -3    0.06    1.12
  -4 -14  -3    1.07    1.20
  -4 -14  -3    2.46    1.20
  -4 -14  -3    0.06    1.18
   4 -14   3    1.65    1.12
  -4  14  -3   -0.28    1.22
   3 -15  -3    2.40    1.23
  -3 -15   3    1.51    1.14
  -3  15   3    2.11    1.26
   3  15  -3    1.34    1.39
  -2 -15   3    3.20    1.24
   2  15  -3    1.45    1.25
  -2  15   3    4.86    1.28
  -1 -15   3    0.66    1.06
   1 -15  -3    1.86    0.99
   1 -15  -3    2.18    1.10
  -1  15   3    0.14    1.04
   1  15  -3   -0.03    1.14
   0 -15  -3    1.99    1.05
   0 -15  -3    3.22    1.12
   0 -15   3    3.45    1.21
   0  15  -3    4.93    1.35
   0  15   3    3.94    1.22
   1 -15   3    2.43    1.13
  -1 -15  -3    1.37    1.05
  -1 -15  -3    0.13    0.99
   1  15   3    1.08    1.17
  -1  15  -3    0.04    1.12
  -2 -15  -3    3.29    1.20
  -2 -15  -3    4.07    1.23
   2 -15   3    2.62    1.36
  -2  15  -3    4.39    1.42
   2  15   3    5.16    1.44
  -3 -15  -3   -3.11    1.02
  -3 -15  -3   -0.68    1.32
  -3 -15  -3   -0.57    1.34
   3 -15   3    1.07    1.19
  -3  15  -3    0.63    1.12
   1 -16  -3    0.34    1.17
  -1 -16   3   -0.70    1.33
   1  16  -3   -3.01    1.12
  -1  16   3    0.40    1.34
   0 -16   3   -1.09    1.27
   0 -16  -3    2.13    1.33
   0  16  -3    2.73    1.36
   0  16   3    4.38    1.42
  -1 -16  -3    7.80    1.57
   1 -16   3   10.40    1.80
  -1  16  -3    9.91    1.84
   1  16   3    9.61    1.81
  10   0  -4   -0.79    1.31
 -10   0   4    2.15    1.64
  -9   0   4    0.37    1.00
   9   0  -4    0.17    1.18
   8   0  -4    0.68    0.86
  -8   0   4   -1.39    0.84
   7   0  -4   -0.58    0.58
  -7   0   4    0.44    0.67
   6   0  -4   15.18    1.33
  -6   0   4   15.83    1.26
   6   0  -4   15.79    0.56
   5   0  -4   -0.01    0.16
  -5   0   4    0.08    0.18
  -5   0   4   -0.14    0.34
   4   0  -4   33.86    1.69
   4   0  -4   37.56    1.20
  -4   0   4   38.14    1.24
  -4   0   4   42.61    1.73
   3   0  -4    0.35    0.24
   3   0  -4    0.07    0.14
   3   0  -4   -0.17    0.19
  -3   0   4   -0.41    0.25
  -3   0   4   -0.05    0.18
  -3   0   4    0.01    0.11
  -2   0   4   66.80    2.14
   2   0  -4   69.97    2.14
   2   0  -4   69.46    2.01
  -2   0   4   72.61    2.25
  -2   0   4   69.38    2.02
   2   0  -4   73.77    2.30
  -1   0   4    0.03    0.07
   1   0  -4    0.04    0.09
  -1   0   4   -0.08    0.08
   1   0  -4   -0.05    0.06
  -1   0   4   -0.08    0.08
   1   0  -4   -0.06    0.08
   0   0   4   11.59    0.42
   0   0  -4   11.51    0.45
   0   0   4   10.96    0.45
   0   0  -4   11.26    0.41
   0   0  -4   11.12    0.45
   0   0   4   11.72    0.46
  -1   0  -4    1.62    0.21
   1   0   4    1.08    0.18
  -1   0  -4    0.78    0.17
   1   0   4    1.54    0.22
  -2   0  -4    1.02    0.14
   2   0   4    0.92    0.24
   2   0   4    1.12    0.14
   2   0   4    0.80    0.22
  -2   0  -4    1.20    0.28
  -2   0  -4    0.93    0.25
  -3   0  -4    0.03    0.09
   3   0   4   -0.13    0.19
  -3   0  -4   -0.20    0.27
  -3   0  -4   -0.09    0.21
   3   0   4    0.29    0.09
   3   0   4   -0.16    0.25
   4   0   4    5.75    0.68
  -4   0  -4    4.75    0.68
  -5   0  -4    0.13    0.42
   5   0   4    0.29    0.41
   6   0   4   12.56    1.22
  -6   0  -4   13.20    1.23
   7   0   4    0.32    0.73
  -7   0  -4    0.04    0.62
  -8   0  -4    3.17    1.14
   8   0   4    2.61    1.01
  -9   0  -4   -0.94    1.07
   9   0   4    0.04    1.07
  10  -1  -4   21.93    2.67
 -10  -1   4   19.88    2.38
   9  -1  -4    0.08    0.98
  -9  -1   4    0.41    1.09
  -9   1   4    3.43    1.37
   9   1  -4    2.36    1.13
  -8  -1   4   -0.23    0.88
   8  -1  -4    0.11    0.76
   8   1  -4   -0.29    0.77
  -8   1   4   -0.93    0.75
  -7  -1   4   12.44    1.49
   7  -1  -4   12.11    1.48
  -7   1   4   11.65    1.41
   7   1  -4    8.71    1.26
  -6  -1   4   -0.45    0.42
   6  -1  -4    0.57    0.52
   6  -1  -4    0.74    0.23
  -6   1   4    0.61    0.25
  -6   1   4    0.06    0.47
   6   1  -4    0.11    0.45
  -5  -1   4    6.87    0.38
  -5  -1   4    6.97    0.90
   5  -1  -4    7.96    0.50
   5   1  -4    7.48    0.39
  -5   1   4    7.96    0.52
  -5   1   4    7.27    0.89
  -4  -1   4    1.60    0.22
   4  -1  -4    1.29    0.25
  -4  -1   4    1.35    0.41
   4  -1  -4    1.13    0.44
   4   1  -4    1.29    0.19
   4   1  -4    0.44    0.31
  -4   1   4    1.77    0.41
  -4   1   4    1.15    0.22
  -3  -1   4    1.07    0.32
  -3  -1   4    0.58    0.30
   3  -1  -4    1.49    0.36
  -3  -1   4    1.74    0.37
  -3  -1   4    1.11    0.19
   3  -1  -4    1.57    0.34
   3  -1  -4    1.03    0.21
  -3   1   4    0.78    0.30
  -3   1   4    0.82    0.27
  -3   1   4    0.69    0.19
   3   1  -4    0.96    0.17
   3   1  -4    1.22    0.32
  -2  -1   4  248.87    6.56
  -2  -1   4  243.64    6.57
  -2  -1   4  244.67    6.34
   2  -1  -4  236.65    6.65
   2  -1  -4  243.85    6.39
   2  -1  -4  240.01    6.45
  -2  -1   4  239.51    6.57
   2   1  -4  242.48    6.61
   2   1  -4  242.00    6.33
  -2   1   4  239.16    6.40
  -2   1   4  233.06    6.59
  -2   1   4  235.64    6.46
   1  -1  -4  116.91    3.25
   1  -1  -4  116.22    3.14
  -1  -1   4  117.78    3.27
  -1  -1   4  118.75    3.22
  -1  -1   4  120.29    3.25
   1  -1  -4  121.75    3.35
   1   1  -4  118.86    3.22
   1   1  -4  117.68    3.28
  -1   1   4  118.96    3.26
   1   1  -4  117.64    3.26
  -1   1   4  118.88    3.14
  -1   1   4  118.64    3.33
   0  -1  -4  100.12    2.58
   0  -1  -4   99.07    2.77
   0  -1  -4   99.58    2.72
   0  -1   4   98.88    2.72
   0  -1   4   95.45    2.73
   0   1  -4  100.13    2.74
   0   1   4   96.29    2.76
   0   1  -4   98.19    2.72
   0   1   4   98.56    2.73
   0   1   4   99.49    2.58
   0   1  -4   99.26    2.62
   1  -1   4  185.13    4.91
  -1  -1  -4  185.50    4.87
  -1  -1  -4  189.77    4.99
   1  -1   4  187.12    4.96
  -1  -1  -4  181.31    5.05
   1  -1   4  183.36    5.04
  -1   1  -4  181.73    4.91
  -1   1  -4  184.85    4.96
   1   1   4  185.42    4.88
   1   1   4  188.17    4.99
   1   1   4  180.16    5.05
  -1   1  -4  184.84    5.05
  -2  -1  -4   18.33    0.89
  -2  -1  -4   17.45    0.59
   2  -1   4   16.07    0.63
   2  -1   4   18.10    0.87
  -2  -1  -4   19.31    0.88
   2   1   4   18.25    0.88
   2   1   4   18.89    0.88
  -2   1  -4   16.59    0.82
  -2   1  -4   17.43    0.67
   2   1   4   17.56    0.60
  -2   1  -4   16.90    0.86
  -3  -1  -4    0.26    0.32
   3  -1   4    0.25    0.28
  -3  -1  -4   -0.16    0.21
   3  -1   4    0.15    0.22
   3  -1   4    0.27    0.12
   3   1   4    0.35    0.32
  -3   1  -4    0.21    0.26
   3   1   4   -0.16    0.23
   3   1   4    0.20    0.08
  -3   1  -4    0.21    0.33
   4  -1   4   12.06    0.52
   4  -1   4   13.72    0.95
  -4  -1  -4   11.85    0.92
   4  -1   4   11.64    0.48
   4   1   4   11.26    0.90
  -4   1  -4   11.73    0.91
   5  -1   4   24.97    1.52
  -5  -1  -4   25.31    1.51
   5   1   4   23.86    1.50
  -5   1  -4   23.29    1.47
  -6  -1  -4   16.91    1.44
   6  -1   4   17.48    1.42
   6   1   4   14.46    1.38
  -6   1  -4   16.87    1.42
  -7  -1  -4    1.71    0.74
   7  -1   4    0.87    0.71
   7   1   4    2.03    0.88
  -7   1  -4    1.32    0.78
  -8  -1  -4   -0.14    0.96
   8  -1   4    1.07    0.89
   8   1   4    0.68    0.89
  -8   1  -4    0.18    0.86
   9  -1   4   -0.15    1.20
  -9  -1  -4    3.20    1.16
  -9   1  -4    1.07    1.14
   9   1   4    2.01    1.11
   9  -2  -4    2.60    1.27
  -9  -2   4    1.68    1.05
   9   2  -4    2.57    1.16
  -9   2   4    2.07    1.22
  -8  -2   4   -1.18    0.81
   8  -2  -4   -0.38    0.90
   8   2  -4   -0.59    0.86
  -8   2   4   -1.13    0.80
   7  -2  -4    0.77    0.32
   7  -2  -4    1.98    0.69
   7  -2  -4    1.82    0.36
  -7  -2   4    1.64    0.81
   7   2  -4    0.01    0.67
  -7   2   4    1.89    0.76
   6  -2  -4   -0.02    0.50
   6  -2  -4    1.40    0.37
  -6  -2   4    1.31    0.60
   6   2  -4    1.75    0.64
  -6   2   4    2.38    0.41
  -6   2   4    0.94    0.55
   5  -2  -4    3.82    0.71
  -5  -2   4    2.64    0.26
   5  -2  -4    2.16    0.38
  -5  -2   4    2.09    0.66
   5   2  -4    2.70    0.28
  -5   2   4    2.80    0.41
  -5   2   4    2.03    0.57
   4  -2  -4    2.22    0.34
  -4  -2   4    1.81    0.44
  -4  -2   4    2.12    0.25
   4  -2  -4    2.83    0.55
   4   2  -4    2.00    0.51
  -4   2   4    1.67    0.43
   4   2  -4    2.00    0.27
  -4   2   4    1.90    0.32
  -3  -2   4  162.82    4.31
   3  -2  -4  159.29    4.82
   3  -2  -4  159.62    4.43
  -3  -2   4  162.75    4.77
  -3  -2   4  154.65    4.69
  -3  -2   4  154.79    4.71
   3  -2  -4  160.30    4.60
   3   2  -4  155.66    4.31
  -3   2   4  164.16    4.77
   3   2  -4  158.46    4.74
  -3   2   4  157.20    4.61
   2  -2  -4    1.28    0.24
   2  -2  -4    1.30    0.24
  -2  -2   4    1.41    0.28
   2  -2  -4    1.07    0.29
  -2  -2   4    1.44    0.27
  -2  -2   4    1.86    0.23
   2   2  -4    1.26    0.27
  -2   2   4    0.88    0.25
   2   2  -4    0.88    0.22
   2   2  -4    0.98    0.18
  -2   2   4    0.87    0.19
  -2   2   4    1.46    0.24
   1  -2  -4   55.79    1.85
   1  -2  -4   58.90    1.64
  -1  -2   4   58.16    1.84
  -1  -2   4   58.92    1.72
   1  -2  -4   59.94    1.82
  -1  -2   4   59.83    1.78
   1   2  -4   60.31    1.74
  -1   2   4   58.17    1.85
  -1   2   4   57.60    1.82
   1   2  -4   58.56    1.78
  -1   2   4   61.13    1.65
   1   2  -4   59.79    1.86
   0  -2   4   45.47    1.49
   0  -2   4   49.10    1.53
   0  -2  -4   47.34    1.33
   0  -2  -4   44.74    1.51
   0  -2  -4   48.46    1.49
   0   2   4   48.07    1.33
   0   2  -4   47.39    1.50
   0   2  -4   48.29    1.53
   0   2   4   47.51    1.50
   0   2   4   50.48    1.55
   1  -2   4   32.84    1.06
   1  -2   4   32.72    1.12
   1  -2   4   32.44    1.21
  -1  -2  -4   33.03    1.07
  -1  -2  -4   32.26    1.13
  -1  -2  -4   32.06    1.21
  -1   2  -4   32.39    1.07
   1   2   4   32.92    1.09
   1   2   4   32.56    1.12
  -1   2  -4   33.48    1.21
  -1   2  -4   33.06    1.13
   1   2   4   33.40    1.21
   2  -2   4   38.88    1.44
   2  -2   4   40.22    1.33
  -2  -2  -4   40.30    1.50
  -2  -2  -4   39.28    1.22
  -2   2  -4   42.63    1.57
   2   2   4   40.52    1.49
  -2   2  -4   40.71    1.36
   2   2   4   39.59    1.25
  -2   2  -4   40.33    1.47
   2   2   4   41.17    1.55
   3  -2   4   22.77    0.91
   3  -2   4   23.40    1.14
   3  -2   4   21.87    0.88
  -3  -2  -4   23.82    1.19
  -3  -2  -4   23.74    0.74
   3   2   4   22.25    1.17
   3   2   4   22.96    1.20
  -3   2  -4   23.90    1.20
  -3   2  -4   23.85    1.19
   3   2   4   22.77    0.75
   4  -2   4    0.73    0.25
   4  -2   4    1.19    0.22
  -4  -2  -4    1.12    0.41
   4  -2   4    1.55    0.42
   4   2   4    0.48    0.32
  -4   2  -4    0.22    0.33
   5  -2   4    0.74    0.22
  -5  -2  -4   -0.21    0.40
   5  -2   4    0.11    0.35
   5  -2   4    0.35    0.24
  -5   2  -4    0.06    0.39
   5   2   4    0.19    0.44
   6  -2   4    0.25    0.17
   6  -2   4    0.29    0.20
   6  -2   4   -0.60    0.53
  -6  -2  -4   -0.37    0.53
   6   2   4    0.55    0.50
  -6   2  -4   -0.13    0.56
  -7  -2  -4    0.36    0.70
   7  -2   4    0.60    0.69
  -7   2  -4    0.54    0.71
   7   2   4    0.12    0.70
   8  -2   4    0.08    0.92
  -8  -2  -4    0.26    0.81
   8   2   4   -0.40    0.77
  -8   2  -4    0.52    0.90
   9  -2   4   -0.81    1.17
  -9  -2  -4    0.95    1.23
   9   2   4    0.31    1.10
  -9   2  -4    0.80    1.11
  -9  -3   4    0.52    1.10
   9  -3  -4    0.25    1.21
  -9   3   4    1.14    1.21
   9   3  -4    2.29    1.28
   8  -3  -4    0.97    0.88
  -8  -3   4    1.07    1.03
   8  -3  -4    0.71    0.41
   8   3  -4   -0.89    0.91
  -8   3   4    0.25    0.96
  -7  -3   4    5.23    1.02
   7  -3  -4    8.30    1.31
   7  -3  -4    8.25    0.72
   7  -3  -4    8.15    0.73
   7   3  -4    7.20    1.22
  -7   3   4    8.96    1.26
  -6  -3   4    0.21    0.59
   6  -3  -4   -0.57    0.37
   6  -3  -4   -0.12    0.55
  -6   3   4   -0.41    0.47
   6   3  -4   -0.09    0.54
  -6   3   4    0.29    0.34
   5  -3  -4    0.20    0.34
   5  -3  -4    0.01    0.42
  -5  -3   4    0.18    0.41
  -5  -3   4    0.25    0.19
  -5   3   4    0.45    0.32
  -5   3   4    0.36    0.39
   5   3  -4    0.69    0.44
  -4  -3   4   31.44    1.09
   4  -3  -4   31.26    1.26
  -4  -3   4   30.31    1.58
   4  -3  -4   34.73    1.68
   4   3  -4   32.58    1.58
  -4   3   4   31.94    1.49
   4   3  -4   32.26    1.15
  -4   3   4   31.25    1.30
  -3  -3   4    4.17    0.58
  -3  -3   4    4.73    0.36
  -3  -3   4    4.21    0.56
   3  -3  -4    4.69    0.65
  -3   3   4    4.67    0.53
  -3   3   4    3.84    0.61
  -3   3   4    4.75    0.51
   3   3  -4    4.76    0.40
   3   3  -4    4.63    0.56
  -2  -3   4    1.65    0.29
  -2  -3   4    1.47    0.24
   2  -3  -4    1.41    0.27
  -2  -3   4    1.90    0.34
   2  -3  -4    1.60    0.26
   2  -3  -4    1.21    0.30
  -2   3   4    1.24    0.31
   2   3  -4    2.19    0.37
  -2   3   4    2.15    0.29
   2   3  -4    0.92    0.24
   2   3  -4    1.78    0.28
  -2   3   4    1.71    0.31
   1  -3  -4  148.74    4.34
  -1  -3   4  153.00    4.26
   1  -3  -4  151.72    4.31
  -1  -3   4  149.81    4.11
   1  -3  -4  150.54    4.10
  -1  -3   4  160.27    4.36
  -1   3   4  151.92    4.09
  -1   3   4  154.81    4.34
   1   3  -4  154.25    4.11
   1   3  -4  150.85    4.36
  -1   3   4  156.30    4.32
   1   3  -4  155.57    4.29
   0   3  -4 1000.00   25.30
   0   3   4  964.65   25.28
   1  -3   4   79.91    2.24
  -1  -3  -4   79.38    2.37
  -1  -3  -4   79.42    2.39
   1  -3   4   80.38    2.51
   1  -3   4   75.74    2.42
  -1  -3  -4   79.76    2.37
  -1  -3  -4   80.34    2.50
  -1   3  -4   78.22    2.43
  -1   3  -4   80.50    2.50
   1   3   4   82.60    2.40
   1   3   4   76.84    2.48
  -1   3  -4   80.42    2.25
  -2  -3  -4    9.92    0.51
  -2  -3  -4   10.89    0.77
   2  -3   4    7.83    0.64
   2  -3   4   10.32    0.61
   2  -3   4   10.21    0.58
  -2  -3  -4   10.87    0.69
  -2  -3  -4   10.05    0.70
  -2   3  -4    9.17    0.59
   2   3   4    9.83    0.67
   2   3   4   10.91    0.54
  -2   3  -4   10.19    0.61
  -2   3  -4    8.62    0.65
  -3  -3  -4   22.11    1.16
   3  -3   4   22.01    1.11
   3  -3   4   20.06    0.92
  -3  -3  -4   21.30    0.78
   3  -3   4   21.89    0.96
   3   3   4   21.89    0.81
  -3   3  -4   21.98    1.13
  -3   3  -4   22.94    1.22
   3   3   4   21.67    1.18
   4  -3   4    9.97    0.60
   4  -3   4    9.68    0.80
   4  -3   4    8.56    0.63
  -4  -3  -4    7.88    0.35
  -4  -3  -4    8.45    0.82
  -4  -3  -4    8.50    0.36
  -4   3  -4    8.35    0.96
   4   3   4    6.51    0.82
   5  -3   4    8.94    1.03
   5  -3   4    8.14    0.62
  -5  -3  -4    7.93    1.04
   5  -3   4    7.26    0.55
   5   3   4    8.08    0.99
  -5   3  -4    6.44    0.94
   6  -3   4   59.22    2.77
   6  -3   4   61.41    2.00
  -6  -3  -4   63.92    2.90
   6   3   4   61.46    2.88
  -6   3  -4   62.57    2.85
   7  -3   4    0.99    0.24
   7  -3   4    0.71    0.27
   7  -3   4    0.81    0.74
  -7   3  -4    0.62    0.70
   8  -3   4    1.89    1.06
  -8  -3  -4    2.15    0.96
  -8   3  -4    2.17    1.00
   8   3   4    2.58    1.02
   9  -3   4   -0.66    1.11
  -9  -3  -4   -2.60    2.05
  -9   3  -4    0.09    1.39
  -9  -4   4    2.30    1.17
   9  -4  -4    1.67    1.30
   9   4  -4    0.31    1.26
  -9   4   4   -0.85    1.22
   8  -4  -4    0.27    0.97
   8  -4  -4    0.08    0.54
  -8  -4   4   -0.55    1.00
  -8   4   4    0.08    0.92
   8   4  -4    1.82    0.94
  -7  -4   4   -0.01    0.82
   7  -4  -4    0.25    0.46
   7  -4  -4    0.29    0.80
   7   4  -4    0.38    0.75
  -7   4   4   -0.12    0.63
  -6  -4   4    4.16    0.86
  -6  -4   4    4.29    0.35
   6  -4  -4    4.34    0.93
  -6  -4   4    4.06    0.36
   6   4  -4    4.33    0.92
  -6   4   4    3.97    0.77
  -5  -4   4   24.35    1.52
  -5  -4   4   22.92    0.97
  -5  -4   4   22.21    0.92
   5  -4  -4   24.93    1.61
  -5   4   4   22.97    1.41
  -5   4   4   23.50    1.20
   5   4  -4   22.96    1.48
  -4  -4   4    7.41    0.51
   4  -4  -4    9.04    0.86
  -4  -4   4    8.32    0.98
   4  -4  -4    8.14    0.66
  -4   4   4    9.36    0.71
   4   4  -4    7.61    0.74
  -4   4   4    8.83    0.80
   4   4  -4    9.62    0.62
   3  -4  -4   26.10    1.18
  -3  -4   4   26.12    1.06
   3  -4  -4   26.65    1.34
   3  -4  -4   26.47    1.20
  -3  -4   4   26.46    1.29
   3   4  -4   26.88    1.27
  -3   4   4   27.62    1.22
   3   4  -4   27.72    1.12
  -3   4   4   27.80    1.23
   3   4  -4   26.47    1.34
  -2  -4   4    1.34    0.30
  -2  -4   4    0.85    0.35
   2  -4  -4    1.47    0.30
   2  -4  -4    1.41    0.32
   2  -4  -4    1.58    0.35
  -2  -4   4    1.22    0.25
   2   4  -4    1.66    0.30
   2   4  -4    1.81    0.35
  -2   4   4    1.58    0.29
   2   4  -4    1.82    0.33
  -2   4   4    2.01    0.39
  -2   4   4    2.09    0.37
  -1  -4   4   10.05    0.64
  -1  -4   4   10.37    0.47
   1  -4  -4    9.96    0.64
  -1  -4   4    9.93    0.61
   1  -4  -4    9.41    0.50
   1  -4  -4    8.96    0.59
  -1   4   4    9.89    0.60
  -1   4   4    9.88    0.49
  -1   4   4    9.69    0.63
   1   4  -4    9.83    0.61
   1   4  -4    9.57    0.64
   1   4  -4    9.92    0.45
   0  -4  -4    2.29    0.33
   0  -4   4    3.59    0.43
   0  -4  -4    2.46    0.29
   0  -4  -4    2.03    0.31
   0  -4   4    4.03    0.52
   0   4  -4    2.69    0.39
   0   4   4    2.74    0.37
   0   4   4    2.85    0.27
  -1  -4  -4   73.23    2.22
  -1  -4  -4   72.51    2.26
  -1  -4  -4   67.82    2.31
   1  -4   4   72.35    2.36
   1  -4   4   68.39    2.29
   1  -4   4   70.54    2.03
  -1   4  -4   67.78    2.30
   1   4   4   71.14    2.33
  -1   4  -4   69.90    2.34
  -1   4  -4   71.55    2.01
   1   4   4   71.70    2.27
   1   4   4   69.71    2.23
  -2  -4  -4   88.40    2.92
   2  -4   4   87.72    2.71
  -2  -4  -4   89.83    2.68
   2  -4   4   86.49    2.78
   2  -4   4   88.34    2.81
   2  -4   4   85.17    2.91
  -2  -4  -4   89.62    2.87
  -2  -4  -4   89.23    2.84
   2   4   4   88.50    2.70
  -2   4  -4   87.72    2.69
   2   4   4   91.15    2.93
  -2   4  -4   91.83    2.96
   3  -4   4    5.17    0.49
  -3  -4  -4    4.64    0.40
   3  -4   4    3.82    0.51
   3  -4   4    5.16    0.61
  -3  -4  -4    5.27    0.67
  -3   4  -4    3.62    0.55
   3   4   4    4.78    0.40
   3   4   4    4.83    0.65
  -3   4  -4    4.66    0.66
   4  -4   4   14.38    0.84
   4  -4   4   13.47    0.88
  -4  -4  -4   12.81    1.07
  -4  -4  -4   13.76    0.64
   4  -4   4   15.38    1.05
  -4  -4  -4   14.49    0.63
   4   4   4   16.00    1.12
  -4   4  -4   16.18    1.13
   5  -4   4  101.68    3.10
   5  -4   4  100.28    3.65
  -5  -4  -4   97.68    3.72
   5  -4   4   95.58    3.13
  -5   4  -4  102.12    3.78
   5   4   4   97.98    3.74
   6  -4   4    4.26    0.65
   6  -4   4    5.64    1.02
   6  -4   4    5.60    0.58
  -6  -4  -4    5.63    1.01
   6   4   4    3.53    0.93
  -6   4  -4    4.70    0.97
  -7  -4  -4    9.48    1.39
   7  -4   4    7.92    0.68
   7  -4   4    9.78    1.33
   7   4   4    9.02    1.32
  -8  -4  -4   -0.56    0.89
   8  -4   4    0.26    0.93
   8   4   4    0.91    0.94
  -8   4  -4    0.48    1.03
  -9  -4  -4   -0.44    1.30
   9  -4   4    0.60    1.29
  -9   4  -4   -0.70    1.34
   9   4   4    0.28    1.18
   9  -5  -4   -1.72    1.25
  -9  -5   4    0.44    1.41
  -9   5   4   -0.66    1.27
   9   5  -4    0.99    1.26
   8  -5  -4    0.92    1.11
   8  -5  -4    0.56    0.63
  -8  -5   4    0.76    0.97
  -8   5   4    0.19    0.91
   8   5  -4    0.94    0.94
  -7  -5   4   -0.64    0.72
   7  -5  -4   -0.71    0.82
   7  -5  -4   -0.36    0.54
  -7   5   4    0.68    0.79
   7   5  -4    0.78    0.80
  -6  -5   4   25.59    1.07
  -6  -5   4   29.23    1.90
   6  -5  -4   25.25    1.88
  -6  -5   4   26.17    1.02
  -6   5   4   29.69    1.78
   6   5  -4   30.18    1.88
  -5  -5   4    0.30    0.43
   5  -5  -4   -0.29    0.51
  -5  -5   4    0.40    0.25
  -5  -5   4    0.41    0.35
  -5   5   4    0.13    0.35
   5   5  -4    0.52    0.50
  -5   5   4   -0.59    0.37
  -4  -5   4    0.73    0.34
  -4  -5   4    0.31    0.40
   4  -5  -4    0.76    0.40
  -4  -5   4    1.04    0.28
  -4   5   4    0.62    0.36
   4   5  -4    0.68    0.40
  -4   5   4    0.56    0.34
   3  -5  -4    2.52    0.54
  -3  -5   4    1.35    0.42
  -3  -5   4    2.50    0.40
   3  -5  -4    2.11    0.46
   3   5  -4    2.57    0.44
   3   5  -4    2.18    0.44
  -3   5   4    2.77    0.49
   3   5  -4    2.07    0.48
  -3   5   4    2.73    0.47
  -2  -5   4   27.34    1.15
  -2  -5   4   27.71    1.20
   2  -5  -4   29.12    1.31
   2  -5  -4   27.43    1.15
   2   5  -4   26.82    1.32
   2   5  -4   28.69    1.27
   2   5  -4   27.91    1.23
  -2   5   4   27.32    1.25
  -2   5   4   26.89    1.28
  -2   5   4   27.48    1.13
   1  -5  -4    1.96    0.34
   1  -5  -4    1.92    0.31
  -1  -5   4    1.61    0.35
   1  -5  -4    2.16    0.40
  -1  -5   4    1.83    0.25
  -1  -5   4    1.82    0.36
  -1   5   4    2.21    0.40
   1   5  -4    1.62    0.35
   1   5  -4    1.67    0.23
  -1   5   4    2.03    0.38
   1   5  -4    3.08    0.47
  -1   5   4    2.29    0.31
   0  -5  -4   18.40    0.96
   0  -5   4   18.26    0.61
   0  -5   4   19.55    0.98
   0  -5  -4   19.64    0.94
   0  -5  -4   20.20    1.06
   0  -5  -4   18.03    0.83
   0  -5   4   19.09    0.61
   0  -5   4   19.35    0.99
   0   5  -4   18.01    0.99
   0   5  -4   20.14    1.00
   0   5   4   19.84    0.98
   0   5   4   17.87    0.83
  -1  -5  -4    7.48    0.62
  -1  -5  -4    8.77    0.62
   1  -5   4    7.92    0.68
   1  -5   4    8.13    0.44
   1  -5   4    8.34    0.66
   1  -5   4    9.43    0.69
  -1  -5  -4    8.41    0.59
   1   5   4    8.11    0.58
  -1   5  -4    8.81    0.66
  -1   5  -4    8.64    0.42
   1   5   4    8.65    0.63
  -2  -5  -4   12.45    0.75
  -2  -5  -4   14.02    0.87
  -2  -5  -4   15.10    0.90
   2  -5   4   12.22    0.70
   2  -5   4   12.71    0.82
  -2   5  -4   13.09    0.71
  -2   5  -4   12.23    0.85
   2   5   4   14.65    0.79
   2   5   4   13.21    0.86
  -3  -5  -4    0.21    0.26
   3  -5   4    0.04    0.26
  -3  -5  -4    0.40    0.29
   3  -5   4    0.03    0.23
   3   5   4    0.05    0.29
  -3   5  -4    0.48    0.34
  -3   5  -4   -0.06    0.29
  -4  -5  -4   16.80    0.79
   4  -5   4   15.13    1.07
   4  -5   4   14.20    0.91
  -4  -5  -4   16.18    0.79
   4   5   4   12.86    1.28
  -4   5  -4   15.15    1.15
   5  -5   4   16.76    1.02
  -5  -5  -4   16.95    0.70
   5  -5   4   17.42    1.33
  -5  -5  -4   19.33    1.42
  -5  -5  -4   17.75    0.72
   5   5   4   17.60    1.36
  -5   5  -4   16.17    1.33
   6  -5   4   -0.52    0.56
   6  -5   4    0.35    0.42
  -6  -5  -4   -0.12    0.58
   6   5   4    0.66    0.62
  -6   5  -4   -1.03    0.64
   7  -5   4    3.51    1.02
  -7  -5  -4    3.36    0.99
   7  -5   4    3.15    0.57
   7   5   4    2.77    1.02
  -7   5  -4    1.97    0.96
  -8  -5  -4   -0.97    0.94
   8  -5   4    1.22    1.07
   8   5   4    0.42    0.97
  -8   5  -4    1.17    1.02
   9  -5   4    0.34    1.38
  -9  -5  -4    1.58    1.30
  -9   5  -4    0.44    1.32
   9   5   4    0.45    1.42
  -9  -6   4    0.25    1.22
  -9   6   4    0.24    1.19
  -8  -6   4    4.88    1.24
   8  -6  -4    4.36    1.32
  -8   6   4    4.36    1.24
   8   6  -4    4.68    1.32
   7  -6  -4    0.83    0.65
  -7  -6   4    0.18    0.84
  -7   6   4    2.26    0.91
   7   6  -4    1.00    0.78
  -6  -6   4    0.17    0.32
  -6  -6   4    0.26    0.62
   6  -6  -4    0.88    0.86
   6  -6  -4    1.42    0.72
   6   6  -4    0.93    0.65
  -6   6   4    0.73    0.64
  -5  -6   4   20.84    1.59
  -5  -6   4   22.47    1.05
  -5  -6   4   20.80    1.16
   5  -6  -4   21.03    1.54
  -5   6   4   24.24    1.62
  -5   6   4   20.89    1.30
   5   6  -4   21.86    1.46
  -4  -6   4    1.46    0.55
   4  -6  -4    3.08    0.72
  -4  -6   4    1.68    0.51
  -4  -6   4    1.53    0.35
  -4   6   4    1.55    0.48
   4   6  -4    0.90    0.43
  -4   6   4    1.36    0.44
   3  -6  -4    0.54    0.37
  -3  -6   4    0.04    0.25
   3  -6  -4    0.34    0.37
  -3  -6   4    0.14    0.38
   3   6  -4    0.20    0.30
  -3   6   4    0.57    0.34
  -3   6   4    0.24    0.29
   3   6  -4   -0.05    0.31
   2  -6  -4   32.04    1.50
   2  -6  -4   34.09    1.39
  -2  -6   4   33.42    1.34
  -2  -6   4   35.17    1.46
   2   6  -4   34.77    1.32
   2   6  -4   34.00    1.60
  -2   6   4   34.30    1.56
  -2   6   4   32.19    1.35
  -2   6   4   30.93    1.57
   1  -6  -4    1.13    0.31
   1  -6  -4    0.99    0.29
  -1  -6   4    0.72    0.22
  -1  -6   4    0.96    0.32
   1   6  -4    0.78    0.34
  -1   6   4    1.32    0.34
  -1   6   4    0.87    0.28
  -1   6   4    0.48    0.28
   0  -6   4   27.59    0.90
   0  -6  -4   25.99    1.13
   0  -6  -4   29.11    1.26
   0  -6   4   27.65    0.89
   0  -6  -4   29.04    1.26
   0  -6   4   27.05    1.30
   0   6   4   25.94    1.29
   0   6  -4   27.97    1.33
   0   6   4   28.18    1.16
  -1  -6  -4   20.87    1.11
   1  -6   4   22.08    0.83
   1  -6   4   20.43    1.13
  -1  -6  -4   22.15    1.06
  -1  -6  -4   22.94    1.12
   1   6   4   21.41    1.10
  -1   6  -4   21.20    0.79
   1   6   4   21.33    1.06
  -1   6  -4   22.64    1.18
   2  -6   4    4.15    0.57
  -2  -6  -4    2.31    0.44
  -2  -6  -4    2.94    0.53
   2   6   4    2.27    0.42
  -2   6  -4    2.59    0.49
  -2   6  -4    2.57    0.38
   2   6   4    2.41    0.45
  -3  -6  -4    4.35    0.55
  -3  -6  -4    3.94    0.64
   3  -6   4    4.56    0.64
  -3  -6  -4    2.82    0.49
   3  -6   4    3.31    0.53
  -3   6  -4    2.81    0.52
   3   6   4    3.92    0.60
  -3   6  -4    5.26    0.77
  -4  -6  -4   12.78    0.83
  -4  -6  -4   11.74    0.80
  -4  -6  -4   11.10    1.11
   4  -6   4   14.72    1.00
   4  -6   4   12.78    1.02
   4   6   4   13.45    1.09
  -4   6  -4   15.37    1.19
  -5  -6  -4    8.99    1.19
   5  -6   4   10.12    0.90
  -5  -6  -4    8.34    0.61
  -5  -6  -4    6.85    0.62
   5  -6   4    8.65    1.07
   5   6   4   10.27    1.23
  -5   6  -4    9.14    1.22
   6  -6   4   -0.33    0.47
  -6  -6  -4    0.52    0.66
  -6  -6  -4    0.01    0.04
   6  -6   4   -0.71    0.64
   6   6   4   -0.28    0.68
  -6   6  -4    1.12    0.73
  -7  -6  -4   -1.63    0.74
   7  -6   4   -0.08    0.71
   7  -6   4   -0.11    0.57
  -7   6  -4    0.38    0.86
   7   6   4   -0.50    0.93
  -8  -6  -4    1.95    1.04
   8  -6   4    0.09    1.10
  -8   6  -4    0.67    1.28
   8   6   4    0.45    1.00
  -9  -6  -4    2.33    1.38
  -9   6  -4    2.45    1.46
   9   6   4    1.95    1.38
   9  -7  -4    0.84    1.54
  -9  -7   4   -2.18    1.30
   9   7  -4    4.09    1.59
  -9   7   4    0.14    1.44
  -8  -7   4    0.67    1.14
   8  -7  -4   -0.41    0.83
   8  -7  -4   -0.95    0.97
   8   7  -4    0.44    1.19
  -8   7   4   -0.31    1.02
   7  -7  -4   -0.25    0.87
  -7  -7   4    0.38    0.88
   7  -7  -4    0.11    0.70
   7   7  -4   -1.07    1.36
  -7   7   4   -0.65    0.71
   6  -7  -4    4.35    0.80
   6  -7  -4    6.27    1.10
  -6  -7   4    4.11    0.54
  -6  -7   4    3.66    0.95
  -6  -7   4    4.92    0.79
   6   7  -4    2.87    0.84
  -6   7   4    3.24    0.90
   5  -7  -4    1.08    0.69
  -5  -7   4    1.47    0.65
  -5  -7   4    1.92    0.45
  -5   7   4    1.43    0.59
  -5   7   4    2.03    0.60
   5   7  -4    0.84    0.58
   4  -7  -4    8.40    1.28
  -4  -7   4    6.50    0.71
  -4  -7   4    7.07    0.99
   4   7  -4    5.86    0.76
  -4   7   4    7.98    0.89
  -4   7   4    4.80    0.75
  -3  -7   4    3.36    0.54
   3  -7  -4    3.77    0.70
   3   7  -4    5.13    0.81
   3   7  -4    2.71    0.49
  -3   7   4    4.59    0.61
  -3   7   4    3.68    0.63
   2  -7  -4   -0.22    0.35
   2  -7  -4   -0.40    0.28
  -2  -7   4    0.04    0.33
  -2  -7   4    0.37    0.31
   2   7  -4   -0.43    0.31
  -2   7   4    0.33    0.28
   2   7  -4    0.07    0.25
  -2   7   4    0.11    0.32
  -1  -7   4   18.25    0.82
   1  -7  -4   18.89    1.05
   1  -7  -4   18.77    1.01
  -1  -7   4   19.81    0.81
  -1  -7   4   21.69    1.16
   1   7  -4   19.37    1.14
  -1   7   4   18.69    0.97
  -1   7   4   16.81    1.02
  -1   7   4   19.31    1.15
   0  -7   4   24.51    1.30
   0  -7  -4   22.86    1.16
   0  -7   4   25.41    0.89
   0  -7   4   24.99    0.90
   0  -7  -4   28.16    1.27
   0  -7  -4   26.78    1.27
   0   7  -4   26.87    1.34
   0   7   4   26.88    1.36
   0   7   4   24.66    1.17
   1  -7   4    9.85    0.54
   1  -7   4   10.23    0.81
  -1  -7  -4    8.69    0.70
  -1   7  -4    8.71    0.50
   1   7   4    9.50    0.74
  -1   7  -4    8.66    0.77
   1   7   4    9.39    0.77
   2  -7   4   20.41    1.19
   2  -7   4   19.76    0.96
  -2   7  -4   19.04    0.91
   2   7   4   19.43    1.11
   2   7   4   21.11    1.20
  -2   7  -4   19.02    1.19
  -3  -7  -4   20.74    1.15
   3  -7   4   18.58    1.18
   3  -7   4   20.17    1.12
  -3  -7  -4   19.35    1.30
  -3   7  -4   19.60    1.10
   3   7   4   20.26    1.25
  -3   7  -4   19.77    1.28
   4  -7   4    6.01    0.92
  -4  -7  -4    7.78    0.78
   4  -7   4    6.77    0.83
  -4  -7  -4    5.85    0.92
   4   7   4    6.33    0.92
  -4   7  -4    6.60    0.93
  -5  -7  -4    0.05    0.45
  -5  -7  -4    0.28    0.36
   5  -7   4    1.57    0.57
   5  -7   4   -0.03    0.52
  -5  -7  -4    1.36    0.70
   5   7   4    0.30    0.55
  -5   7  -4    0.65    0.58
  -6  -7  -4   -0.56    0.78
   6  -7   4   -0.49    0.68
   6  -7   4    0.61    0.62
  -6   7  -4    0.11    0.72
   6   7   4    0.98    0.72
   7  -7   4    2.00    1.01
   7  -7   4    4.55    0.85
  -7  -7  -4    2.38    1.04
  -7   7  -4    3.31    1.10
   7   7   4    2.73    1.10
   8  -7   4    0.01    1.18
  -8  -7  -4    0.18    1.13
   8   7   4    1.20    1.20
  -8   7  -4   -1.03    1.21
  -8  -8   4   -0.87    1.26
   8  -8  -4   -1.27    1.23
   8  -8  -4   -1.07    0.99
  -8   8   4    1.86    1.42
   8   8  -4   -1.45    1.14
  -7  -8   4   11.32    1.72
   7  -8  -4   10.67    1.27
   7  -8  -4   11.31    1.67
  -7   8   4    8.90    1.41
   7   8  -4    7.06    1.41
   6  -8  -4   10.11    1.37
  -6  -8   4    9.63    0.84
   6  -8  -4    9.55    1.17
  -6  -8   4    8.71    1.41
  -6   8   4    4.81    1.03
   6   8  -4    6.50    1.12
  -5  -8   4   18.59    1.59
   5  -8  -4   18.41    1.38
  -5  -8   4   18.73    1.13
   5  -8  -4   21.19    1.61
  -5   8   4   17.13    1.36
   5   8  -4   18.26    1.40
  -4  -8   4   38.33    1.74
   4  -8  -4   38.76    2.01
  -4   8   4   38.63    1.87
   4   8  -4   35.49    1.81
  -4   8   4   41.73    2.01
  -3  -8   4    0.14    0.38
   3  -8  -4    0.35    0.43
  -3   8   4    0.12    0.41
   3   8  -4    0.43    0.43
   3   8  -4    0.39    0.33
  -3   8   4   -0.13    0.35
  -2  -8   4    0.93    0.39
   2  -8  -4    1.38    0.47
  -2  -8   4    0.77    0.42
   2   8  -4    1.09    0.46
   2   8  -4    1.22    0.35
  -2   8   4    0.25    0.32
  -2   8   4    1.37    0.51
  -1  -8   4    0.45    0.24
  -1  -8   4    0.72    0.30
   1  -8  -4    0.72    0.36
  -1  -8   4    0.67    0.38
  -1   8   4    0.20    0.37
  -1   8   4    0.43    0.31
   1   8  -4    0.76    0.49
   0  -8   4    2.03    0.29
   0  -8  -4    1.79    0.48
   0  -8   4    1.97    0.31
   0   8   4    2.27    0.51
   0   8  -4    2.61    0.55
   0   8   4    1.72    0.44
   1  -8   4   -0.02    0.22
  -1  -8  -4    0.42    0.35
   1  -8   4    0.04    0.22
   1  -8   4   -0.06    0.38
  -1   8  -4   -0.15    0.35
   1   8   4   -0.42    0.32
   1   8   4    0.05    0.35
  -2  -8  -4   43.75    1.92
   2  -8   4   41.78    1.95
   2  -8   4   42.60    1.60
   2   8   4   39.87    1.87
  -2   8  -4   42.41    1.53
  -2   8  -4   40.84    1.95
  -3  -8  -4    4.56    0.80
   3  -8   4    5.40    0.81
   3  -8   4    4.47    0.64
  -3  -8  -4    4.65    0.67
  -3   8  -4    6.14    0.89
  -3   8  -4    4.96    0.66
   3   8   4    3.64    0.67
   4  -8   4    5.54    0.83
  -4  -8  -4    4.41    0.68
   4  -8   4    5.25    0.83
  -4  -8  -4    5.11    0.91
  -4   8  -4    4.66    0.98
   4   8   4    4.22    0.81
   5  -8   4    1.11    0.69
  -5  -8  -4    2.61    0.57
  -5  -8  -4    1.71    0.78
   5  -8   4    2.89    0.71
   5   8   4    2.12    0.79
  -5   8  -4    0.72    0.66
  -6  -8  -4   -0.20    0.44
   6  -8   4    1.10    0.69
   6  -8   4   -0.32    0.80
  -6  -8  -4    0.63    0.81
  -6   8  -4    0.26    0.77
   7  -8   4    1.63    0.83
  -7  -8  -4    1.54    1.20
   7  -8   4    0.99    1.69
   7   8   4    0.33    0.90
  -7   8  -4    0.69    1.15
   8  -8   4    4.03    1.31
  -8  -8  -4    4.38    1.56
   8   8   4    2.15    1.57
  -8   8  -4    3.78    1.41
   8  -9  -4    3.83    1.46
  -8  -9   4    3.09    1.37
   8  -9  -4    3.33    1.42
  -8   9   4    0.02    1.29
   8   9  -4    3.08    1.45
  -7  -9   4    0.54    1.06
   7  -9  -4    0.06    0.84
   7  -9  -4    0.81    1.12
  -7   9   4    0.43    1.01
   7   9  -4   -0.09    1.01
  -6  -9   4   10.57    1.58
   6  -9  -4   11.53    1.41
  -6  -9   4   11.77    1.11
   6  -9  -4   10.09    1.54
   6   9  -4   18.23    1.61
  -6   9   4   12.64    1.43
  -5  -9   4    0.18    0.51
   5  -9  -4    0.12    0.72
  -5  -9   4    0.15    0.69
   5  -9  -4    0.35    0.63
  -5   9   4    0.68    0.68
   5   9  -4    0.55    0.62
   4  -9  -4   10.89    1.25
  -4  -9   4   10.28    1.00
   4   9  -4   13.44    1.49
  -4   9   4   10.06    1.09
   4   9  -4   10.83    1.04
   3  -9  -4   47.24    2.21
  -3  -9   4   46.65    2.09
   3   9  -4   45.53    2.34
  -3   9   4   47.86    2.06
   3   9  -4   47.55    1.94
  -3   9   4   49.75    2.30
  -2  -9   4   30.50    1.38
  -2  -9   4   29.80    1.41
  -2  -9   4   33.61    1.73
   2  -9  -4   31.16    1.62
  -2   9   4   32.63    1.59
  -2   9   4   36.09    1.84
   2   9  -4   35.61    1.87
  -1  -9   4    0.23    0.35
   1  -9  -4    0.25    0.35
  -1  -9   4    0.33    0.32
  -1   9   4    0.61    0.46
  -1   9   4    0.13    0.32
   1   9  -4    0.56    0.40
   0  -9   4   -0.38    0.25
   0  -9  -4   -0.33    0.36
   0  -9   4   -0.74    0.36
   0  -9   4   -0.24    0.22
   0   9  -4    0.04    0.38
   0   9   4    0.20    0.38
   0   9   4    0.64    0.41
   1  -9   4    4.48    0.76
  -1  -9  -4    3.84    0.62
   1  -9   4    4.03    0.45
   1  -9   4    4.34    0.47
  -1   9  -4    4.01    0.75
   1   9   4    3.27    0.62
  -2  -9  -4    1.77    0.57
   2  -9   4    1.44    0.52
  -2  -9  -4    2.03    0.63
   2  -9   4    1.59    0.42
  -2   9  -4    1.25    0.41
  -2   9  -4    1.64    0.54
   3  -9   4    0.67    0.51
   3  -9   4    0.42    0.42
  -3  -9  -4    0.41    0.56
  -3  -9  -4    0.80    0.51
   3   9   4    0.74    0.45
  -3   9  -4    0.50    0.51
  -3   9  -4    0.53    0.55
   4  -9   4    3.58    0.79
  -4  -9  -4    2.74    0.89
   4  -9   4    5.18    0.80
   4   9   4    3.47    0.77
  -4   9  -4    3.77    0.80
  -5  -9  -4    1.45    0.82
   5  -9   4    0.30    0.73
   5  -9   4    0.55    0.69
  -5  -9  -4    0.89    0.54
   5   9   4    0.79    0.81
  -5   9  -4    1.65    0.69
  -6  -9  -4   -0.60    0.92
  -6  -9  -4    0.47    0.57
   6  -9   4   -0.04    0.88
   6  -9   4   -0.16    0.69
   6   9   4   -1.20    0.80
  -6   9  -4    0.11    0.92
  -7  -9  -4    0.30    1.27
   7  -9   4    2.71    1.18
   7  -9   4    3.20    1.04
   7   9   4    1.22    1.16
  -7   9  -4    3.37    1.12
   8  -9   4    1.31    1.38
  -8  -9  -4    0.02    1.35
   8   9   4   -0.58    1.37
  -8   9  -4   -0.97    1.22
   7 -10  -4   -0.33    0.99
  -7 -10   4   -0.43    1.12
   7 -10  -4    0.85    1.18
  -7  10   4   -1.08    1.14
   7  10  -4   -0.98    1.06
  -6 -10   4   -0.48    1.07
  -6 -10   4    2.56    0.71
   6 -10  -4    2.00    1.13
  -6  10   4    2.09    0.94
   6  10  -4   -0.29    0.93
  -5 -10   4   15.26    1.20
   5 -10  -4   12.82    1.49
   5 -10  -4   14.92    1.59
  -5 -10   4   16.94    1.86
   5  10  -4   13.72    1.42
  -5  10   4   15.99    1.45
   4 -10  -4   19.72    1.56
  -4 -10   4   20.39    1.42
   4 -10  -4   22.46    1.63
  -4  10   4   19.61    1.47
   4  10  -4   20.90    1.74
   4  10  -4   20.63    1.65
   3 -10  -4    0.26    0.50
   3 -10  -4    0.42    0.57
  -3 -10   4   -0.63    0.50
  -3  10   4   -0.01    0.52
   3  10  -4    0.34    0.45
   3  10  -4    0.06    0.62
   2 -10  -4    2.20    0.64
  -2 -10   4    1.49    0.58
  -2 -10   4    2.09    0.49
  -2 -10   4    1.79    0.61
   2  10  -4    4.17    0.79
  -2  10   4    3.67    0.68
  -1 -10   4    5.78    0.56
  -1 -10   4    5.11    0.90
   1 -10  -4    3.98    0.68
  -1 -10   4    5.16    0.58
  -1  10   4    7.64    0.91
   1  10  -4    6.35    0.97
   0 -10   4    5.63    0.53
   0 -10   4    8.05    1.08
   0 -10   4    6.33    0.59
   0 -10  -4    7.86    0.86
   0  10  -4    6.50    0.95
   0  10   4    8.31    0.92
  -1 -10  -4    4.27    0.74
   1 -10   4    4.30    0.50
  -1 -10  -4    3.99    0.83
   1 -10   4    3.88    0.47
   1 -10   4    3.62    0.80
  -1  10  -4    3.71    0.82
   2 -10   4    9.17    0.78
  -2 -10  -4   10.30    1.01
   2 -10   4    9.16    1.19
  -2 -10  -4   11.98    1.07
   2  10   4   10.13    1.00
  -2  10  -4   11.39    1.26
   3 -10   4    1.06    0.62
  -3 -10  -4    0.46    0.64
  -3 -10  -4    1.13    0.61
  -3 -10  -4    0.93    0.55
   3 -10   4    1.33    0.49
  -3  10  -4    0.84    0.58
  -4 -10  -4    4.79    1.05
   4 -10   4    3.25    0.76
   4 -10   4    3.87    0.92
  -4 -10  -4    2.51    0.67
  -4  10  -4    2.41    0.87
   4  10   4    2.75    0.86
  -5 -10  -4    2.16    1.06
   5 -10   4    1.77    0.73
   5 -10   4    3.12    0.88
  -5 -10  -4    2.35    0.72
  -5  10  -4    1.73    1.06
   5  10   4    2.15    0.92
   6 -10   4   -0.12    0.95
   6 -10   4   -0.09    0.96
  -6 -10  -4   -0.31    1.12
  -6  10  -4    2.06    0.98
   6  10   4    2.01    1.09
  -7 -10  -4    0.96    1.42
   7 -10   4    2.16    1.19
   7 -10   4    2.18    1.14
  -7  10  -4    2.09    1.15
   7  10   4    1.93    1.26
   7 -11  -4    2.27    1.37
  -7 -11   4    0.01    1.30
   7 -11  -4   -1.62    1.15
  -7  11   4    0.99    1.33
   7  11  -4    1.50    1.25
  -6 -11   4    4.82    1.42
   6 -11  -4    6.43    1.33
  -6 -11   4    4.13    0.97
   6 -11  -4    1.87    1.09
   6  11  -4    5.75    1.25
   5 -11  -4    2.06    0.91
  -5 -11   4    0.64    0.73
   5 -11  -4    0.59    0.82
  -5 -11   4    0.47    0.92
   5  11  -4    1.77    0.82
  -5  11   4    0.17    0.88
   4 -11  -4    8.27    1.21
  -4 -11   4    6.63    1.00
   4  11  -4    5.39    1.05
   4  11  -4    7.66    0.99
  -4  11   4    7.57    1.05
   3 -11  -4    2.33    0.75
   3 -11  -4    2.52    0.79
  -3 -11   4    1.27    0.58
  -3 -11   4    2.30    0.67
   3  11  -4    2.29    0.89
  -3  11   4    0.42    0.64
  -2 -11   4    0.83    0.66
   2 -11  -4    0.87    0.63
  -2 -11   4    1.67    0.48
   2 -11  -4    2.25    0.66
  -2 -11   4    0.83    0.59
  -2  11   4    2.03    0.63
   2  11  -4    1.16    0.64
  -1 -11   4    1.02    0.39
   1 -11  -4    1.54    0.67
  -1 -11   4   -0.28    0.49
  -1 -11   4    1.10    0.59
   1 -11  -4    1.60    0.59
   1  11  -4    1.52    0.72
  -1  11   4    1.99    0.63
   0 -11   4   11.55    1.33
   0 -11   4   10.99    0.76
   0 -11  -4   12.08    1.06
   0 -11  -4   10.66    1.29
   0  11  -4    9.94    1.16
   0  11   4   10.05    1.10
  -1 -11  -4    1.70    0.65
   1 -11   4    1.47    0.45
  -1 -11  -4    2.01    0.65
   1 -11   4    0.86    0.67
   1  11   4    1.51    0.62
  -1  11  -4    2.00    0.66
  -2 -11  -4   11.13    1.21
  -2 -11  -4   11.09    1.28
   2 -11   4   10.43    1.31
   2 -11   4   11.07    0.88
  -2  11  -4   11.16    1.33
   2  11   4   11.62    1.26
   3 -11   4    1.34    0.56
  -3 -11  -4    2.04    0.79
  -3 -11  -4    1.20    0.70
   3 -11   4    0.89    0.77
  -3 -11  -4    0.89    0.77
  -3  11  -4    0.77    0.65
   4 -11   4    0.65    0.69
  -4 -11  -4    0.57    0.72
  -4 -11  -4    0.53    0.72
  -4 -11  -4    0.63    0.74
  -4  11  -4   -0.39    0.82
  -5 -11  -4    2.19    0.83
   5 -11   4    2.19    1.00
   5 -11   4    1.38    0.89
  -5 -11  -4    2.78    1.07
   5  11   4    3.41    1.25
  -5  11  -4    3.00    1.03
   6 -11   4    5.20    1.27
   6 -11   4    5.58    1.28
  -6 -11  -4    3.86    1.44
  -6 -11  -4    4.04    0.98
   6  11   4    2.08    1.21
  -6  11  -4    3.70    1.26
   7 -11   4    3.48    1.30
  -7 -11  -4    1.20    1.58
   7 -11   4    3.50    1.41
   7  11   4   -0.15    1.39
  -6 -12   4    1.05    0.96
   6 -12  -4    0.38    1.10
   6 -12  -4   -1.03    1.21
  -6  12   4    0.91    1.20
   6  12  -4    0.10    1.11
  -5 -12   4    0.95    1.01
  -5 -12   4    2.14    0.90
   5 -12  -4    1.03    1.07
   5 -12  -4    0.73    1.06
  -5  12   4    1.40    1.04
   5  12  -4    2.10    1.00
  -4 -12   4    0.29    0.77
   4 -12  -4    1.63    0.94
  -4 -12   4   -0.01    0.74
   4 -12  -4   -0.54    0.84
  -4  12   4    0.13    0.83
   4  12  -4   -0.37    0.82
   3 -12  -4   -0.01    0.75
  -3 -12   4    1.06    0.62
   3 -12  -4    0.28    0.80
  -3 -12   4    1.18    0.80
  -3  12   4    1.03    0.78
   3  12  -4    0.48    0.75
  -2 -12   4   19.97    1.15
   2 -12  -4   17.30    1.37
  -2 -12   4   20.29    1.56
   2 -12  -4   18.14    1.60
   2  12  -4   19.22    1.70
  -2  12   4   17.43    1.42
  -1 -12   4   14.88    1.40
  -1 -12   4   14.52    0.91
   1 -12  -4   14.24    1.21
  -1  12   4   14.19    1.26
   1  12  -4   15.28    1.52
   0 -12  -4    1.94    0.64
   0 -12   4    2.14    0.78
   0 -12   4    0.65    0.47
   0 -12  -4    0.80    0.77
   0  12   4    1.73    0.69
   0  12  -4    1.90    0.75
  -1 -12  -4    4.17    0.81
   1 -12   4    3.56    0.61
  -1 -12  -4    3.96    0.96
  -1  12  -4    5.24    1.04
   1  12   4    4.04    0.89
   2 -12   4    7.33    1.13
  -2 -12  -4    8.27    1.12
   2 -12   4    7.32    0.77
  -2 -12  -4    8.71    1.23
  -2  12  -4    5.89    1.07
   2  12   4    7.24    1.08
  -3 -12  -4    4.29    1.05
  -3 -12  -4    5.46    1.09
   3 -12   4    4.16    1.11
   3 -12   4    4.28    0.77
  -3 -12  -4    5.67    1.03
  -3  12  -4    4.86    1.27
   4 -12   4    0.36    0.85
  -4 -12  -4    0.57    0.91
  -4 -12  -4    1.55    1.02
   4 -12   4    0.69    0.78
  -4 -12  -4   -0.09    0.78
  -4  12  -4   -0.51    0.92
  -5 -12  -4    0.82    0.98
  -5 -12  -4    0.56    1.05
   5 -12   4    1.33    1.04
   5 -12   4    3.29    1.07
  -5  12  -4    1.40    1.03
   6 -12   4   -1.67    1.10
   6 -12   4   -1.84    1.67
  -6 -12  -4    0.44    1.39
  -6  12  -4    0.91    1.36
   6  12   4   -0.34    1.19
  -6 -13   4    2.19    1.13
  -6 -13   4    1.70    1.47
   6 -13  -4    1.33    1.41
   6 -13  -4    0.44    1.54
   6  13  -4   -0.20    1.26
  -6  13   4    0.93    1.30
   5 -13  -4    2.23    1.48
   5 -13  -4   -0.86    1.14
  -5 -13   4   -1.83    1.04
  -5 -13   4   -0.57    0.94
  -5 -13   4   -0.81    1.15
  -5  13   4    1.28    1.13
   4 -13  -4    2.18    1.01
  -4 -13   4    2.51    1.00
   4 -13  -4    3.13    1.08
  -4 -13   4    4.38    1.03
  -4  13   4    3.37    1.07
   4  13  -4    3.14    1.10
   3 -13  -4    2.17    0.94
  -3 -13   4    0.26    0.74
   3 -13  -4   -0.08    0.85
  -3 -13   4    0.29    0.73
   3  13  -4    1.53    1.08
  -3  13   4    1.56    0.88
   2 -13  -4   -0.12    0.75
   2 -13  -4   -0.16    0.75
  -2 -13   4   -0.06    0.70
  -2 -13   4    0.34    0.58
   2  13  -4   -0.79    0.75
  -2  13   4   -0.85    0.77
   1 -13  -4    3.24    0.82
  -1 -13   4    0.88    0.52
   1 -13  -4    1.60    0.84
  -1 -13   4    1.96    0.82
  -1  13   4    2.37    0.84
   1  13  -4    0.73    0.78
   0 -13  -4    2.60    0.82
   0 -13  -4    3.58    1.04
   0 -13   4    1.48    0.92
   0 -13   4    3.25    0.68
   0  13   4    3.36    0.88
   1 -13   4    2.05    0.93
   1 -13   4    2.76    0.69
  -1 -13  -4    2.93    0.89
  -1 -13  -4    3.24    0.90
   1  13   4    3.81    1.01
  -2 -13  -4    6.54    1.28
  -2 -13  -4    5.23    1.07
   2 -13   4    6.76    1.27
   2  13   4    6.73    1.18
  -2  13  -4    4.96    1.13
   3 -13   4   -1.33    0.83
  -3 -13  -4   -1.31    0.83
  -3 -13  -4    0.17    1.00
  -3 -13  -4    0.56    0.87
  -3  13  -4    0.46    0.98
  -4 -13  -4   12.11    1.51
  -4 -13  -4   14.90    1.71
   4 -13   4   22.31    1.91
  -4 -13  -4   16.57    2.01
  -4  13  -4   18.50    1.82
  -5 -13  -4   -0.54    1.19
   5 -13   4   -1.64    1.08
  -5 -13  -4    1.50    1.07
  -5 -13  -4    0.70    1.21
  -5  13  -4    2.97    1.33
   5 -14  -4    0.05    1.18
  -5 -14   4    0.45    1.30
  -5 -14   4   -2.16    1.10
   5 -14  -4   -1.65    1.37
  -5  14   4   -1.11    1.28
   4 -14  -4    0.36    1.16
   4 -14  -4    0.10    1.18
  -4 -14   4    1.91    1.12
  -4  14   4    1.69    1.24
  -3 -14   4    0.61    0.87
   3 -14  -4    1.12    1.06
   3 -14  -4    1.12    1.00
   3  14  -4    1.16    1.07
  -3  14   4    2.04    1.04
   2 -14  -4    6.54    1.37
   2 -14  -4    5.35    1.12
  -2 -14   4    5.65    1.29
   2  14  -4    5.98    1.24
  -2  14   4    5.07    1.12
   1 -14  -4   18.65    2.01
   1 -14  -4   15.73    1.56
  -1 -14   4   15.59    1.86
  -1  14   4   14.76    1.61
   1  14  -4   12.98    1.59
   0 -14   4    0.01    0.87
   0 -14  -4    0.46    0.83
   0 -14  -4    0.12    0.84
   0  14  -4   -0.16    0.96
   0  14   4    0.70    0.90
   1 -14   4   10.15    1.54
  -1 -14  -4    6.06    1.11
  -1 -14  -4    8.20    1.33
   1  14   4    8.15    1.30
  -1  14  -4   10.07    1.45
  -2 -14  -4    2.72    1.03
  -2 -14  -4    2.81    1.09
   2 -14   4    3.32    1.19
  -2  14  -4    1.29    1.05
   2  14   4    2.55    1.07
  -3 -14  -4    4.02    1.20
   3 -14   4    2.76    1.07
  -3 -14  -4    1.06    1.05
  -3 -14  -4    3.32    1.27
  -3  14  -4    2.15    1.11
   4 -14   4    1.48    1.35
  -4 -14  -4    2.96    1.44
  -4 -14  -4    1.10    1.26
  -4 -14  -4    2.21    1.30
  -4  14  -4    0.70    1.34
  -3 -15   4    0.27    1.18
   3 -15  -4    1.00    1.18
   3  15  -4   -1.42    1.31
  -3  15   4   -2.45    1.13
   2 -15  -4    0.02    1.13
  -2 -15   4   -0.08    0.98
   2  15  -4    2.63    1.31
  -2  15   4    2.07    1.16
   1 -15  -4   -0.36    1.03
  -1 -15   4    1.38    1.16
   1 -15  -4    0.81    0.99
   1  15  -4   -0.45    1.15
  -1  15   4   -0.12    1.24
   0 -15   4    2.77    1.13
   0 -15  -4    5.43    1.25
   0 -15  -4    4.01    1.12
   0  15  -4    3.11    1.34
   0  15   4    5.65    1.35
  -1 -15  -4    5.56    1.31
   1 -15   4    3.58    1.28
  -1 -15  -4    2.88    1.16
  -1  15  -4    4.07    1.30
   1  15   4    3.90    1.19
  -2 -15  -4    0.36    1.12
   2 -15   4   -1.24    1.35
  -2 -15  -4   -0.28    1.00
  -2  15  -4   -1.59    1.18
   3 -15   4    0.02    1.15
  -3 -15  -4    1.13    1.32
  -3 -15  -4    0.48    1.21
  -3 -15  -4    2.98    1.40
  -3  15  -4   -0.80    1.27
  -1 -16   4   -0.96    1.26
   1 -16  -4    0.45    1.24
   1  16  -4    0.14    1.57
  -1  16   4   -0.28    1.38
   0 -16   4    2.01    1.36
   0 -16  -4   -0.17    1.35
   0  16   4   -1.77    1.28
   0  16  -4   -0.58    1.44
   1 -16   4    3.19    1.35
  -1 -16  -4    4.09    1.48
  -1  16  -4    3.92    1.38
   1  16   4    3.76    1.49
 -10   0   5    0.79    1.41
  10   0  -5    1.58    1.49
   9   0  -5    9.15    1.74
  -9   0   5    8.51    1.60
   8   0  -5   -0.11    0.80
  -8   0   5   -1.60    0.80
  -7   0   5    2.10    0.83
   7   0  -5    3.37    0.88
   6   0  -5    0.17    0.21
  -6   0   5    0.21    0.43
  -6   0   5    0.10    0.22
   6   0  -5   -0.17    0.51
  -5   0   5   37.24    1.77
   5   0  -5   33.90    1.17
  -5   0   5   34.74    1.22
   4   0  -5    0.21    0.16
  -4   0   5   -0.14    0.14
  -4   0   5   -0.50    0.26
   4   0  -5   -0.29    0.27
   3   0  -5   35.60    1.18
  -3   0   5   36.80    1.21
  -3   0   5   33.72    1.41
   3   0  -5   33.78    1.51
  -3   0   5   35.86    1.50
   2   0  -5   -0.01    0.10
  -2   0   5    0.03    0.13
  -2   0   5   -0.06    0.15
  -2   0   5   -0.13    0.08
  -2   0   5    0.04    0.12
  -1   0   5  351.61    9.24
   1   0  -5  352.89    9.25
  -1   0   5  360.04    9.20
  -1   0   5  347.05    9.12
   1   0  -5  345.98    9.18
   1   0  -5  358.08    9.14
   0   0   5    0.03    0.09
   0   0   5    0.12    0.09
   0   0  -5   -0.01    0.08
   0   0   5    0.23    0.08
   0   0  -5    0.04    0.08
   0   0  -5   -0.10    0.09
   1   0   5  233.18    6.11
   1   0   5  221.52    5.97
   1   0   5  227.86    6.12
  -1   0  -5  224.35    5.97
  -1   0  -5  231.99    6.11
  -1   0  -5  225.07    6.11
  -2   0  -5   -0.07    0.15
   2   0   5    0.10    0.17
  -2   0  -5   -0.04    0.09
  -2   0  -5    0.00    0.18
   2   0   5    0.21    0.19
   2   0   5    0.02    0.09
   3   0   5   -0.59    0.29
  -3   0  -5    0.03    0.25
   3   0   5   -0.11    0.21
  -3   0  -5   -0.10    0.11
  -3   0  -5   -0.10    0.28
   3   0   5    0.15    0.11
   4   0   5   -0.28    0.27
  -4   0  -5    0.18    0.25
   4   0   5    0.12    0.09
   4   0   5    0.00    0.10
   5   0   5   48.05    2.25
  -5   0  -5   47.02    2.21
   6   0   5   -0.34    0.51
  -6   0  -5   -0.21    0.48
  -7   0  -5    0.95    0.78
   7   0   5    0.74    0.63
  -8   0  -5   -0.23    0.86
   8   0   5    0.50    0.84
  -9   0  -5    0.51    1.27
   9   0   5    0.32    1.20
  10  -1  -5   -0.96    1.25
 -10  -1   5    0.66    1.53
  10   1  -5   -0.47    1.52
 -10   1   5    2.31    1.45
   9  -1  -5    7.29    1.45
  -9  -1   5    8.41    1.53
  -9   1   5   14.88    1.85
   9   1  -5   12.61    1.86
  -8  -1   5    1.21    0.93
   8  -1  -5    1.62    1.01
  -8   1   5    0.82    0.76
   8   1  -5    0.51    0.91
   7  -1  -5    6.11    0.42
   7  -1  -5    6.21    0.45
  -7  -1   5    4.25    0.96
   7  -1  -5    4.37    0.92
   7   1  -5    7.09    1.16
  -7   1   5    4.44    0.98
  -6  -1   5    1.18    0.58
   6  -1  -5    0.34    0.55
  -6  -1   5    0.44    0.19
   6  -1  -5    0.22    0.26
   6   1  -5    0.42    0.19
   6   1  -5   -0.20    0.49
  -6   1   5    1.05    0.30
  -6   1   5    0.38    0.53
  -5  -1   5   12.98    0.59
   5  -1  -5   11.78    0.65
   5  -1  -5   11.68    1.06
  -5  -1   5   13.81    1.09
  -5   1   5   11.29    0.93
   5   1  -5   12.23    0.57
  -4  -1   5   71.99    2.15
   4  -1  -5   72.76    2.20
  -4  -1   5   74.12    2.66
   4  -1  -5   72.59    2.77
  -4   1   5   73.86    2.58
   4   1  -5   72.62    2.13
   4   1  -5   71.53    2.71
  -4   1   5   71.68    2.35
  -3  -1   5    1.33    0.33
   3  -1  -5    2.16    0.37
  -3  -1   5    2.10    0.40
  -3  -1   5    1.80    0.39
  -3  -1   5    1.74    0.25
   3  -1  -5    1.87    0.41
   3  -1  -5    1.68    0.26
   3   1  -5    1.40    0.36
  -3   1   5    2.17    0.36
  -3   1   5    1.38    0.27
  -3   1   5    1.81    0.41
   3   1  -5    2.05    0.25
  -2  -1   5    6.24    0.37
  -2  -1   5    6.89    0.49
   2  -1  -5    6.08    0.39
   2  -1  -5    6.07    0.39
  -2  -1   5    6.86    0.45
   2  -1  -5    5.82    0.48
   2   1  -5    6.05    0.36
  -2   1   5    5.95    0.39
  -2   1   5    6.46    0.40
  -2   1   5    6.92    0.50
   2   1  -5    6.38    0.47
  -1  -1   5   26.63    0.95
   1  -1  -5   28.69    1.03
  -1  -1   5   27.66    0.93
  -1  -1   5   27.09    0.93
   1  -1  -5   28.00    0.95
   1   1  -5   26.99    0.92
  -1   1   5   26.55    0.81
   1   1  -5   26.77    0.96
  -1   1   5   26.81    0.96
  -1   1   5   26.21    0.99
   1   1  -5   27.13    0.95
  -1   1   5   26.95    0.81
   0  -1  -5   65.36    1.90
   0  -1   5   66.91    1.91
   0  -1   5   64.01    1.91
   0  -1  -5   63.29    1.95
   0  -1  -5   67.54    1.76
   0   1  -5   65.56    1.82
   0   1   5   64.83    1.91
   0   1  -5   64.86    1.91
   0   1  -5   64.61    1.90
   0   1   5   63.54    1.95
  -1  -1  -5   47.82    1.62
  -1  -1  -5   47.38    1.54
   1  -1   5   48.23    1.49
   1  -1   5   51.12    1.54
  -1  -1  -5   49.34    1.47
   1  -1   5   48.60    1.61
   1   1   5   48.90    1.62
   1   1   5   49.40    1.48
  -1   1  -5   50.02    1.51
  -1   1  -5   50.08    1.63
   1   1   5   48.40    1.55
  -1   1  -5   51.00    1.55
   2  -1   5   23.24    0.84
   2  -1   5   25.35    1.05
  -2  -1  -5   25.39    1.11
   2  -1   5   24.37    1.19
  -2  -1  -5   23.63    1.04
  -2  -1  -5   23.56    0.79
  -2   1  -5   24.52    1.06
   2   1   5   23.07    1.07
  -2   1  -5   23.85    0.87
   2   1   5   21.90    1.02
   2   1   5   25.72    0.82
  -2   1  -5   24.26    1.08
  -3  -1  -5   32.18    1.00
   3  -1   5   35.20    1.10
   3  -1   5   36.00    1.50
  -3  -1  -5   36.15    1.52
   3   1   5   33.91    1.50
   3   1   5   32.89    1.49
   3   1   5   34.29    1.02
  -3   1  -5   31.22    1.46
  -3   1  -5   33.21    1.13
  -3   1  -5   33.72    1.51
   4  -1   5    1.88    0.48
   4  -1   5    1.92    0.22
  -4  -1  -5    2.32    0.53
   4  -1   5    1.81    0.25
  -4   1  -5    1.55    0.46
   4   1   5    0.63    0.40
   5  -1   5    3.91    0.27
  -5  -1  -5    4.05    0.70
   5  -1   5    3.99    0.79
   5  -1   5    3.27    0.24
   5   1   5    2.79    0.62
  -5   1  -5    3.52    0.74
   6  -1   5   13.31    1.22
  -6  -1  -5   14.30    1.28
  -6   1  -5   11.12    1.49
   6   1   5   14.86    1.33
  -7  -1  -5   -0.52    0.64
   7  -1   5    0.05    0.71
   7   1   5    1.45    0.80
  -7   1  -5   -0.62    0.63
  -8  -1  -5    1.69    0.94
   8  -1   5    0.45    0.85
  -8   1  -5    0.75    0.96
   8   1   5    2.10    0.97
  -9  -1  -5    0.58    1.30
   9  -1   5   -0.23    1.11
   9   1   5   -0.54    1.31
  -9   1  -5   -0.18    1.14
   9  -2  -5    0.26    1.17
  -9  -2   5   -0.66    1.15
   9   2  -5    0.25    1.06
  -9   2   5   -0.20    1.17
  -8  -2   5    2.03    0.89
   8  -2  -5    3.72    1.10
  -8   2   5    1.73    1.00
   8   2  -5    3.29    0.97
  -7  -2   5    2.28    0.84
   7  -2  -5    1.34    0.85
   7  -2  -5    1.82    0.41
  -7   2   5    0.89    0.65
   7   2  -5    2.11    0.76
  -6  -2   5   -0.08    0.48
  -6  -2   5   -0.07    0.16
   6  -2  -5   -0.49    0.53
  -6   2   5   -0.10    0.30
   6   2  -5   -0.12    0.45
  -6   2   5   -0.04    0.45
   5  -2  -5   11.90    1.07
  -5  -2   5   11.80    0.57
  -5   2   5   12.55    0.73
   5   2  -5   11.98    0.59
  -5   2   5   10.58    0.93
  -4  -2   5    9.15    0.49
   4  -2  -5    7.97    0.81
   4  -2  -5    8.86    0.57
  -4  -2   5    9.33    0.78
  -4   2   5    7.91    0.56
  -4   2   5    7.64    0.68
   4   2  -5    9.14    0.82
   4   2  -5    9.04    0.50
   3  -2  -5   53.23    1.89
  -3  -2   5   55.40    2.01
   3  -2  -5   55.04    1.81
  -3  -2   5   57.76    1.72
  -3  -2   5   59.42    2.10
  -3  -2   5   53.24    2.01
   3  -2  -5   53.76    2.10
  -3   2   5   52.90    1.82
  -3   2   5   54.12    2.06
  -3   2   5   53.85    1.89
   3   2  -5   54.00    1.71
   3   2  -5   59.71    2.09
  -2  -2   5   76.22    2.22
   2  -2  -5   74.89    2.23
  -2  -2   5   78.21    2.41
   2  -2  -5   79.66    2.51
   2  -2  -5   77.09    2.30
  -2  -2   5   73.55    2.35
   2   2  -5   74.76    2.41
   2   2  -5   72.08    2.22
  -2   2   5   77.17    2.45
   2   2  -5   72.67    2.36
  -2   2   5   73.93    2.23
  -1  -2   5   53.00    1.73
  -1  -2   5   56.06    1.69
  -1  -2   5   54.95    1.60
   1  -2  -5   53.23    1.70
   1  -2  -5   52.49    1.77
   1   2  -5   55.58    1.76
   1   2  -5   54.01    1.62
   1   2  -5   51.47    1.67
  -1   2   5   53.55    1.76
  -1   2   5   55.02    1.49
  -1   2   5   54.07    1.73
   0  -2   5  941.63   29.58
   0   2  -5  943.38   29.77
   0   2   5  950.05   27.90
  -1  -2  -5   37.67    1.38
   1  -2   5   36.44    1.20
  -1  -2  -5   37.65    1.27
   1  -2   5   38.07    1.38
   1  -2   5   38.33    1.29
  -1  -2  -5   38.74    1.24
  -1   2  -5   37.61    1.29
   1   2   5   38.51    1.25
  -1   2  -5   36.99    1.21
   1   2   5   39.35    1.28
  -2  -2  -5   20.63    0.75
   2  -2   5   19.13    1.00
   2  -2   5   22.08    0.84
  -2  -2  -5   21.28    1.05
  -2  -2  -5   21.27    0.98
   2  -2   5   19.57    1.00
  -2   2  -5   20.61    1.03
   2   2   5   21.02    0.77
  -2   2  -5   20.23    0.93
   2   2   5   21.17    1.02
  -2   2  -5   21.00    0.86
   2   2   5   20.57    0.96
   3  -2   5    2.95    0.46
   3  -2   5    3.61    0.34
  -3  -2  -5    4.03    0.27
  -3  -2  -5    3.97    0.58
  -3   2  -5    4.58    0.64
  -3   2  -5    3.83    0.58
  -3   2  -5    4.15    0.36
   3   2   5    2.83    0.50
   3   2   5    3.91    0.28
   4  -2   5   16.79    0.72
  -4  -2  -5   17.03    1.12
   4  -2   5   17.13    0.79
   4  -2   5   15.59    1.05
  -4   2  -5   15.54    1.09
   4   2   5   16.61    1.12
   5  -2   5    4.28    0.38
   5  -2   5    4.74    0.73
  -5  -2  -5    3.34    0.70
   5  -2   5    5.87    0.48
   5   2   5    4.31    0.79
  -5   2  -5    5.03    0.81
   6  -2   5   42.92    1.29
   6  -2   5   41.92    1.30
   6  -2   5   41.77    2.25
  -6  -2  -5   45.62    2.32
   6   2   5   43.38    2.31
  -6   2  -5   47.39    2.36
  -7  -2  -5    9.44    1.53
   7  -2   5   12.71    1.48
  -7   2  -5    9.11    1.37
   7   2   5   11.57    1.72
  -8  -2  -5   12.08    1.73
   8  -2   5    8.57    1.56
  -8   2  -5   12.03    1.66
   8   2   5   11.84    1.61
   9  -2   5   -0.94    1.10
  -9  -3   5    0.52    1.24
   9  -3  -5    3.15    1.34
  -9   3   5    1.79    1.16
   9   3  -5    3.35    1.20
   8  -3  -5    0.29    0.98
  -8  -3   5   -0.08    0.98
  -8   3   5   -0.24    0.89
   8   3  -5   -0.97    0.89
  -7  -3   5    4.26    0.94
   7  -3  -5    3.45    0.57
   7  -3  -5    1.88    0.80
   7  -3  -5    3.14    0.56
  -7   3   5    1.78    0.81
   7   3  -5    3.45    0.97
  -6  -3   5   -0.11    0.18
   6  -3  -5    0.31    0.42
  -6  -3   5    0.53    0.51
   6  -3  -5    0.07    0.50
  -6  -3   5    0.26    0.23
  -6   3   5   -0.50    0.31
   6   3  -5    0.55    0.57
  -6   3   5    0.16    0.54
  -5  -3   5    1.47    0.28
   5  -3  -5    0.84    0.52
  -5  -3   5    2.17    0.59
   5  -3  -5    1.71    0.42
   5   3  -5    0.84    0.29
  -5   3   5    1.50    0.47
  -5   3   5    0.84    0.34
   4  -3  -5   27.31    1.51
   4  -3  -5   28.81    1.18
  -4  -3   5   28.29    1.46
  -4  -3   5   27.71    1.11
  -4   3   5   25.85    1.31
   4   3  -5   24.83    1.38
   4   3  -5   26.97    1.06
  -4   3   5   29.44    1.23
   3  -3  -5    5.81    0.69
   3  -3  -5    7.20    0.55
   3  -3  -5    7.77    0.59
  -3  -3   5    8.83    0.70
   3   3  -5    8.53    0.68
  -3   3   5    7.76    0.57
  -3   3   5    6.73    0.57
   3   3  -5    7.02    0.51
   2  -3  -5    7.55    0.46
  -2  -3   5    7.16    0.52
   2  -3  -5    8.18    0.56
  -2  -3   5    8.12    0.49
  -2  -3   5    7.03    0.60
   2  -3  -5    7.08    0.57
   2   3  -5    7.31    0.56
   2   3  -5    8.64    0.51
  -2   3   5    8.61    0.47
  -2   3   5    6.43    0.49
  -2   3   5    7.70    0.61
   2   3  -5    8.17    0.53
  -1  -3   5    2.86    0.24
   1  -3  -5    2.91    0.37
  -1  -3   5    3.62    0.38
   1  -3  -5    3.26    0.23
   1  -3  -5    3.37    0.40
  -1  -3   5    3.83    0.43
   1   3  -5    3.86    0.41
  -1   3   5    2.96    0.21
   1   3  -5    2.95    0.38
  -1   3   5    2.64    0.34
  -1   3   5    3.55    0.41
   1   3  -5    2.83    0.23
   0  -3   5   62.81    1.99
   0  -3  -5   59.02    1.72
   0  -3   5   59.54    1.93
   0  -3  -5   59.08    1.93
   0   3  -5   62.71    1.99
   0   3   5   59.57    1.72
   0   3   5   61.23    2.09
   0   3   5   56.47    1.94
   0   3  -5   63.67    1.97
   1  -3   5    0.44    0.13
   1  -3   5    0.65    0.18
  -1  -3  -5    0.51    0.18
  -1  -3  -5    1.04    0.27
  -1  -3  -5    0.76    0.21
  -1  -3  -5    0.96    0.21
   1  -3   5    0.51    0.22
  -1   3  -5    0.45    0.20
   1   3   5    0.57    0.20
   1   3   5    0.79    0.19
  -1   3  -5    0.50    0.21
  -1   3  -5    0.55    0.15
   2  -3   5   37.55    1.37
  -2  -3  -5   36.56    1.26
  -2  -3  -5   38.83    1.56
   2  -3   5   37.37    1.36
   2  -3   5   38.66    1.57
  -2  -3  -5   37.42    1.47
   2   3   5   38.01    1.29
  -2   3  -5   38.48    1.55
   2   3   5   37.53    1.54
  -2   3  -5   35.55    1.38
  -2   3  -5   36.44    1.38
   3  -3   5   13.78    0.87
   3  -3   5   13.52    0.76
   3  -3   5   13.64    0.72
  -3  -3  -5   17.06    1.01
  -3  -3  -5   14.03    0.61
  -3   3  -5   14.64    0.93
   3   3   5   16.57    1.00
   3   3   5   15.09    0.65
  -3   3  -5   13.93    0.95
   4  -3   5   11.17    0.82
  -4  -3  -5   13.50    1.01
  -4  -3  -5   11.34    0.47
  -4  -3  -5   11.70    0.50
   4  -3   5   11.70    0.67
   4  -3   5   13.40    0.95
   4   3   5   12.48    0.98
  -4   3  -5   10.98    0.97
   5  -3   5    5.06    0.81
   5  -3   5    4.92    0.49
   5  -3   5    4.18    0.59
  -5  -3  -5    5.17    0.88
  -5   3  -5    4.84    0.82
   5   3   5    5.03    0.89
  -6  -3  -5    4.63    0.96
   6  -3   5    4.67    0.52
   6  -3   5    3.69    0.84
   6  -3   5    4.74    0.56
   6   3   5    6.82    1.11
  -6   3  -5    4.03    0.88
   7  -3   5   -0.14    0.25
   7  -3   5    0.07    0.70
   7  -3   5   -0.11    0.22
  -7  -3  -5    0.96    0.92
   7   3   5   -0.21    0.75
   8  -3   5   -0.85    0.93
  -8  -3  -5    1.06    1.08
  -8   3  -5    0.25    0.90
   8   3   5   -0.57    0.83
   9  -3   5    2.61    1.49
  -9  -3  -5    2.32    1.29
   9   3   5    1.64    1.30
   9  -4  -5    0.31    1.27
  -9  -4   5    0.55    1.20
  -9   4   5    0.82    1.28
   9   4  -5   -0.06    1.06
   8  -4  -5    7.65    1.54
  -8  -4   5    5.58    1.39
   8  -4  -5    7.76    0.83
   8   4  -5    7.43    1.37
  -8   4   5    6.95    1.32
   7  -4  -5    1.80    0.82
   7  -4  -5    1.81    0.57
  -7  -4   5    2.06    0.86
  -7   4   5    1.46    0.74
   7   4  -5    1.20    0.67
  -6  -4   5    2.63    0.34
  -6  -4   5    1.26    0.70
   6  -4  -5    2.04    0.77
  -6  -4   5    2.25    0.38
  -6   4   5    1.88    0.70
   6   4  -5    2.70    0.77
  -6   4   5    1.67    0.49
  -5  -4   5   29.49    1.12
  -5  -4   5   29.84    1.70
   5  -4  -5   27.19    1.71
  -5   4   5   29.63    1.55
  -5   4   5   28.77    1.38
   5   4  -5   28.04    1.64
  -4  -4   5    0.65    0.22
   4  -4  -5   -0.56    0.32
  -4  -4   5    0.36    0.34
   4   4  -5    0.97    0.32
  -4   4   5    0.49    0.32
   4   4  -5    0.59    0.40
  -4   4   5    0.94    0.39
  -3  -4   5   13.49    0.68
   3  -4  -5   12.21    0.82
   3  -4  -5   12.67    0.90
  -3  -4   5   12.18    0.84
  -3   4   5   13.91    0.83
   3   4  -5   13.12    0.90
   3   4  -5   12.08    0.80
   3   4  -5   13.28    0.84
  -3   4   5   12.60    0.77
  -2  -4   5   15.44    0.88
  -2  -4   5   15.41    0.77
  -2  -4   5   14.89    0.76
   2  -4  -5   14.55    0.71
   2  -4  -5   14.57    0.82
   2  -4  -5   14.21    0.86
  -2   4   5   14.49    0.70
  -2   4   5   13.38    0.84
   2   4  -5   14.67    0.74
  -2   4   5   13.71    0.82
   2   4  -5   15.00    0.89
   1  -4  -5   51.10    1.85
  -1  -4   5   52.84    1.57
   1  -4  -5   53.38    1.62
   1  -4  -5   52.07    1.86
  -1  -4   5   53.17    1.82
  -1  -4   5   52.94    1.89
   1   4  -5   52.70    1.85
  -1   4   5   55.49    1.87
  -1   4   5   53.92    1.89
  -1   4   5   51.73    1.61
   1   4  -5   54.06    1.91
   1   4  -5   54.23    1.56
   0  -4   5   27.54    1.17
   0  -4   5   25.06    1.11
   0  -4  -5   28.40    0.97
   0  -4  -5   27.64    1.26
   0  -4  -5   26.74    1.14
   0   4  -5   26.20    1.15
   0   4  -5   28.41    1.17
   0   4   5   27.34    1.15
   0   4   5   28.12    0.97
   1  -4   5  107.84    2.96
  -1  -4  -5  113.24    3.19
   1  -4   5  109.54    3.31
   1  -4   5  104.25    3.35
  -1  -4  -5  106.99    3.34
  -1  -4  -5  105.83    3.22
  -1  -4  -5  109.38    3.20
  -1   4  -5  111.58    3.38
  -1   4  -5  106.80    2.96
   1   4   5  111.33    3.37
  -1   4  -5  107.54    3.32
   1   4   5  107.97    3.25
   2  -4   5   73.86    2.47
  -2  -4  -5   75.40    2.63
  -2  -4  -5   73.27    2.36
  -2  -4  -5   73.40    2.52
  -2  -4  -5   78.76    2.55
   2  -4   5   78.08    2.38
  -2   4  -5   72.17    2.47
  -2   4  -5   79.68    2.67
   2   4   5   79.33    2.65
   2   4   5   78.05    2.40
  -2   4  -5   76.28    2.38
   3  -4   5    0.38    0.31
  -3  -4  -5    1.05    0.24
   3  -4   5    0.96    0.31
   3  -4   5    0.77    0.27
  -3  -4  -5    0.34    0.30
   3   4   5    0.41    0.21
   3   4   5    1.30    0.43
  -3   4  -5    0.61    0.32
  -3   4  -5    0.85    0.35
   4  -4   5   17.61    1.14
  -4  -4  -5   16.91    0.70
  -4  -4  -5   17.07    1.19
  -4  -4  -5   16.64    0.74
   4  -4   5   18.10    0.93
   4  -4   5   16.08    0.95
   4   4   5   16.89    1.36
  -5  -4  -5    9.86    1.19
   5  -4   5   10.67    0.76
   5  -4   5   10.34    0.86
   5  -4   5   10.08    1.15
  -5   4  -5    8.75    1.09
   5   4   5    8.30    1.02
  -6  -4  -5    0.32    0.70
   6  -4   5    0.87    0.52
   6  -4   5    0.79    0.36
   6  -4   5    0.29    0.57
   6   4   5    0.72    0.58
  -6   4  -5   -0.14    0.60
  -7  -4  -5    3.41    0.99
   7  -4   5    3.91    0.97
   7  -4   5    4.52    0.52
   7   4   5    3.85    1.04
  -7   4  -5    2.52    0.91
  -8  -4  -5    1.40    0.99
   8  -4   5    1.46    0.98
  -8   4  -5    0.90    0.96
   8   4   5    1.87    1.03
  -9  -4  -5   -0.37    1.22
   9  -4   5   -0.15    1.38
  -9   4  -5    1.78    1.45
   9   4   5    0.75    1.19
   9  -5  -5   -0.95    1.36
   9   5  -5    0.65    1.15
  -9   5   5    1.49    1.33
   8  -5  -5    0.37    0.95
  -8  -5   5    0.13    0.94
   8  -5  -5   -0.53    0.68
  -8   5   5   -0.56    0.86
   8   5  -5    0.19    0.96
   7  -5  -5    4.91    1.06
  -7  -5   5    3.50    1.10
   7  -5  -5    4.01    0.75
  -7   5   5    4.90    1.02
   7   5  -5    5.93    1.16
   6  -5  -5   -0.07    0.59
  -6  -5   5    1.41    0.72
  -6  -5   5    0.17    0.29
  -6  -5   5    0.72    0.40
  -6   5   5   -0.05    0.57
  -6   5   5   -0.04    0.46
   6   5  -5   -0.58    0.53
  -5  -5   5    1.82    0.37
  -5  -5   5    1.92    0.45
   5  -5  -5    3.08    0.69
  -5  -5   5    1.23    0.54
  -5   5   5    1.25    0.45
   5   5  -5    2.86    0.64
  -5   5   5    2.54    0.53
  -4  -5   5    6.52    0.52
  -4  -5   5    7.39    0.91
   4  -5  -5    7.66    0.97
  -4   5   5    6.60    0.75
   4   5  -5    6.43    0.62
  -4   5   5    7.72    0.83
   4   5  -5    6.34    0.80
   3  -5  -5    2.59    0.42
   3  -5  -5    2.42    0.51
  -3  -5   5    3.10    0.50
  -3  -5   5    2.60    0.40
   3   5  -5    2.03    0.48
  -3   5   5    2.18    0.47
   3   5  -5    2.64    0.45
   3   5  -5    2.44    0.46
  -3   5   5    2.34    0.42
   2  -5  -5    0.31    0.25
  -2  -5   5    0.06    0.24
  -2  -5   5    0.08    0.20
   2  -5  -5    0.27    0.25
  -2   5   5    0.64    0.37
  -2   5   5    0.25    0.22
   2   5  -5    0.51    0.28
   2   5  -5    0.57    0.20
  -2   5   5    0.29    0.28
   2   5  -5   -0.19    0.26
  -1  -5   5    0.37    0.24
   1  -5  -5    0.48    0.31
  -1  -5   5   -0.06    0.29
   1  -5  -5    0.51    0.23
   1  -5  -5    0.54    0.21
  -1  -5   5    0.40    0.16
   1   5  -5    0.28    0.13
   1   5  -5    0.57    0.26
   1   5  -5    0.65    0.29
  -1   5   5    0.20    0.22
  -1   5   5    0.39    0.28
  -1   5   5    0.33    0.18
   0  -5  -5   60.37    2.13
   0  -5   5   58.60    2.13
   0  -5  -5   58.04    2.09
   0  -5  -5   59.99    2.10
   0  -5   5   61.30    2.14
   0  -5  -5   60.23    1.91
   0   5  -5   61.60    2.18
   0   5   5   63.26    2.17
   0   5   5   59.51    1.91
   0   5  -5   60.75    2.15
  -1  -5  -5    8.18    0.58
  -1  -5  -5    8.19    0.65
  -1  -5  -5    6.90    0.60
  -1  -5  -5    9.24    0.69
   1  -5   5    7.86    0.61
   1  -5   5    7.31    0.39
   1   5   5    8.13    0.58
  -1   5  -5    7.89    0.38
  -1   5  -5    8.81    0.68
   1   5   5    8.78    0.62
   2  -5   5   91.44    2.71
  -2  -5  -5   91.53    2.81
   2  -5   5   86.74    2.90
  -2  -5  -5   87.74    2.93
  -2  -5  -5   87.85    2.91
  -2   5  -5   87.91    2.68
   2   5   5   90.88    2.83
  -2   5  -5   83.87    3.00
   2   5   5   89.12    3.01
   3  -5   5    0.26    0.23
  -3  -5  -5   -0.01    0.28
   3  -5   5    0.13    0.27
  -3   5  -5    0.13    0.35
   3   5   5    0.28    0.29
  -3   5  -5    0.16    0.29
   3   5   5    0.12    0.22
   4  -5   5   10.89    0.90
  -4  -5  -5   10.12    0.66
  -4  -5  -5   11.75    0.67
   4  -5   5   13.00    0.84
   4   5   5   10.09    0.97
  -4   5  -5   11.09    1.02
   5  -5   5   14.07    0.88
  -5  -5  -5   12.10    0.59
  -5  -5  -5   11.28    0.60
  -5  -5  -5   13.11    1.25
   5  -5   5   12.54    1.07
   5   5   5   12.91    1.19
  -5   5  -5   11.70    1.33
   6  -5   5    0.34    0.61
   6  -5   5    0.18    0.43
  -6  -5  -5   -0.36    0.57
  -6   5  -5    0.63    0.75
   6   5   5    0.77    0.65
  -7  -5  -5    0.13    0.92
   7  -5   5    2.07    0.92
   7  -5   5    1.01    0.50
  -7   5  -5    1.35    0.87
   7   5   5    2.13    0.96
   8  -5   5    2.37    1.05
  -8  -5  -5    2.51    1.12
   8   5   5    3.23    1.11
  -8   5  -5    6.04    1.50
  -9  -5  -5    2.05    1.44
   9   5   5    2.63    1.37
  -9   5  -5    0.07    1.55
   9  -6  -5    1.84    1.71
  -9  -6   5    1.47    1.33
  -9   6   5   -2.15    1.32
   8  -6  -5    0.98    0.77
   8  -6  -5   -0.28    0.98
  -8  -6   5    0.73    1.05
  -8   6   5   -0.32    1.02
   8   6  -5    0.76    1.00
   7  -6  -5    1.36    1.18
  -7  -6   5    1.21    0.34
   7  -6  -5    1.86    0.70
  -7  -6   5    1.14    0.84
  -7   6   5    4.42    1.03
   7   6  -5    1.66    0.86
  -6  -6   5   10.24    0.72
  -6  -6   5   11.89    1.46
  -6  -6   5    9.65    0.88
   6  -6  -5    9.20    1.30
  -6   6   5    8.15    1.04
   6   6  -5    7.21    1.12
  -6   6   5   10.27    1.01
  -5  -6   5   15.00    0.96
  -5  -6   5   15.76    1.39
   5  -6  -5   14.37    1.26
  -5  -6   5   13.60    0.82
   5   6  -5   12.74    1.11
  -5   6   5   12.08    1.01
  -5   6   5   13.13    1.11
  -4  -6   5    4.54    0.55
   4  -6  -5    5.68    0.99
  -4  -6   5    3.90    0.75
  -4   6   5    4.48    0.68
   4   6  -5    3.93    0.66
  -4   6   5    4.47    0.63
  -3  -6   5   15.06    0.98
   3  -6  -5   14.20    1.03
  -3  -6   5   16.74    0.93
   3  -6  -5   14.08    0.92
  -3   6   5   15.88    1.05
  -3   6   5   13.75    0.88
   3   6  -5   14.98    0.93
   3   6  -5   12.52    1.00
  -2  -6   5    5.10    0.61
  -2  -6   5    5.08    0.54
   2  -6  -5    4.01    0.59
   2  -6  -5    4.02    0.57
   2   6  -5    4.49    0.54
   2   6  -5    3.93    0.59
  -2   6   5    4.49    0.51
  -2   6   5    3.71    0.58
  -1  -6   5   37.91    1.25
   1  -6  -5   39.87    1.44
  -1  -6   5   37.34    1.59
   1  -6  -5   38.21    1.59
  -1   6   5   38.10    1.57
   1   6  -5   40.39    1.70
  -1   6   5   36.03    1.64
  -1   6   5   39.55    1.43
   0  -6  -5   16.06    0.82
   0  -6   5   14.93    0.94
   0  -6  -5   17.01    0.94
   0  -6   5   16.30    0.52
   0  -6  -5   16.02    0.93
   0   6   5   15.35    0.80
   0   6  -5   16.25    0.99
   0   6   5   15.69    0.98
  -1  -6  -5   89.55    2.94
   1  -6   5   86.29    2.43
   1  -6   5   84.42    2.93
  -1  -6  -5   83.27    2.74
   1   6   5   85.11    2.89
  -1   6  -5   89.01    2.99
   1   6   5   84.89    2.77
  -1   6  -5   86.75    2.40
  -2  -6  -5   -0.26    0.26
   2  -6   5    0.54    0.34
   2  -6   5    0.13    0.22
  -2   6  -5    0.24    0.23
   2   6   5    0.00    0.28
   2   6   5    0.46    0.29
  -2   6  -5   -0.32    0.29
  -3  -6  -5    2.45    0.52
   3  -6   5    1.52    0.44
   3  -6   5    1.33    0.40
  -3  -6  -5    1.66    0.41
   3   6   5    1.88    0.40
  -3   6  -5    1.41    0.46
   3   6   5    1.79    0.43
  -3   6  -5    1.45    0.46
   4  -6   5    6.11    0.80
  -4  -6  -5    7.06    0.95
  -4  -6  -5    7.19    0.65
   4  -6   5    7.30    0.82
  -4  -6  -5    6.80    0.63
   4   6   5    6.25    0.88
  -4   6  -5    7.57    1.00
  -5  -6  -5    3.43    0.47
   5  -6   5    4.61    0.68
  -5  -6  -5    4.84    0.51
  -5  -6  -5    2.69    0.75
   5  -6   5    3.63    0.77
  -5   6  -5    3.03    0.77
   5   6   5    3.53    0.78
   6  -6   5    1.86    0.72
  -6  -6  -5    1.07    0.69
   6  -6   5    1.62    0.55
  -6   6  -5    0.63    0.82
   6   6   5    1.15    0.81
   7  -6   5    0.40    0.58
  -7  -6  -5    0.69    1.01
   7  -6   5    0.86    0.84
   7   6   5    0.17    0.96
  -7   6  -5   -0.77    0.83
  -8  -6  -5   -0.82    1.10
   8  -6   5   -0.85    1.11
  -8   6  -5   -2.65    1.09
   8   6   5    0.53    1.04
  -9  -7   5    2.01    1.48
   9  -7  -5    1.96    1.57
   9   7  -5    3.37    1.63
  -9   7   5    1.94    1.53
  -8  -7   5    2.32    1.20
   8  -7  -5    1.06    1.22
   8  -7  -5    1.50    0.98
  -8   7   5    1.79    1.28
   8   7  -5    1.31    1.11
  -7  -7   5    1.12    0.44
   7  -7  -5   -0.37    0.76
   7  -7  -5    1.07    0.81
  -7  -7   5    1.31    0.93
  -7   7   5    3.32    0.97
   6  -7  -5    0.41    0.71
  -6  -7   5    0.29    0.40
  -6  -7   5    0.27    0.65
   6   7  -5    0.04    0.65
  -6   7   5    0.34    0.68
  -5  -7   5    0.73    0.40
   5  -7  -5    0.50    0.59
  -5  -7   5    0.82    0.63
  -5   7   5    0.48    0.51
  -5   7   5    0.87    0.59
   5   7  -5    0.06    0.47
  -4  -7   5   31.54    1.46
   4  -7  -5   34.32    1.86
  -4   7   5   35.48    1.64
  -4   7   5   31.07    1.65
   4   7  -5   31.21    1.60
   3  -7  -5    1.12    0.51
  -3  -7   5    0.92    0.51
  -3  -7   5    2.09    0.47
   3   7  -5    1.35    0.42
  -3   7   5    1.06    0.37
   3   7  -5    1.31    0.49
  -2  -7   5   30.37    1.29
  -2  -7   5   31.17    1.48
   2  -7  -5   30.72    1.50
   2  -7  -5   31.82    1.39
  -2   7   5   29.48    1.54
   2   7  -5   30.09    1.58
  -2   7   5   31.99    1.35
   2   7  -5   31.23    1.24
  -1  -7   5   16.13    0.72
   1  -7  -5   16.61    1.00
   1  -7  -5   16.73    0.91
  -1  -7   5   16.25    0.69
  -1  -7   5   16.49    1.03
  -1   7   5   17.50    1.10
   1   7  -5   16.48    1.08
  -1   7   5   17.04    0.88
   0  -7   5    7.54    0.36
   0  -7  -5    8.93    0.73
   0  -7   5    7.24    0.36
   0  -7  -5    7.97    0.64
   0  -7   5    6.33    0.74
   0   7  -5    8.23    0.79
   0   7   5    8.69    0.65
   0   7   5    8.48    0.92
   1  -7   5   24.64    1.30
   1  -7   5   24.08    0.86
  -1  -7  -5   23.74    1.23
  -1  -7  -5   22.13    1.17
   1   7   5   24.93    1.20
  -1   7  -5   23.80    1.31
  -1   7  -5   22.64    0.82
   1   7   5   19.84    1.18
   2  -7   5    9.16    0.98
  -2  -7  -5    6.84    0.81
   2  -7   5    7.65    0.73
  -2   7  -5    7.55    0.86
  -2   7  -5    8.72    0.59
   2   7   5    8.51    0.76
   2   7   5    8.67    0.92
   3  -7   5    2.41    0.50
  -3  -7  -5    2.08    0.55
   3  -7   5    2.38    0.51
  -3   7  -5    3.25    0.57
   3   7   5    2.85    0.68
  -3   7  -5    2.80    0.67
   4  -7   5    2.91    0.58
   4  -7   5    1.67    0.56
  -4  -7  -5    1.21    0.58
  -4  -7  -5    1.69    0.49
  -4   7  -5    1.68    0.66
   4   7   5    2.45    0.64
   5  -7   5   -0.28    0.56
   5  -7   5    0.82    0.53
  -5  -7  -5   -0.24    0.56
  -5  -7  -5    0.15    0.39
  -5  -7  -5    1.02    0.48
   5   7   5    0.48    0.65
  -5   7  -5    0.16    0.65
  -6  -7  -5    2.53    1.00
   6  -7   5    6.13    0.89
   6  -7   5    4.02    0.99
   6   7   5    4.20    1.02
  -6   7  -5    5.80    1.13
   7  -7   5    0.20    0.69
   7  -7   5   -0.73    0.86
  -7  -7  -5    0.92    1.07
  -7   7  -5    2.93    1.17
   7   7   5    2.26    1.09
   8  -7   5    4.10    1.37
  -8  -7  -5    1.95    1.20
   8   7   5    5.29    1.45
  -8   7  -5    2.06    1.40
   8  -8  -5    2.84    1.36
   8  -8  -5    0.05    1.01
  -8   8   5    0.60    1.20
   8   8  -5   -1.00    1.26
   7  -8  -5   -0.02    0.78
   7  -8  -5   -0.99    0.88
  -7  -8   5   -0.32    1.02
  -7  -8   5    0.91    0.61
  -7   8   5    0.54    0.95
   7   8  -5    0.46    0.96
  -6  -8   5   18.09    1.72
  -6  -8   5   14.65    1.03
   6  -8  -5   14.74    1.35
   6  -8  -5   14.02    1.57
  -6   8   5   13.59    1.43
   6   8  -5   15.34    1.40
   5  -8  -5   20.30    1.53
  -5  -8   5   16.35    1.60
  -5  -8   5   17.59    1.07
  -5   8   5   17.34    1.33
   5   8  -5   15.47    1.31
  -5   8   5   15.99    1.33
   4  -8  -5   38.46    2.02
  -4  -8   5   37.76    1.73
  -4   8   5   38.28    1.95
   4   8  -5   37.15    2.07
   4   8  -5   39.58    1.85
  -4   8   5   37.59    1.80
  -3  -8   5   14.02    1.02
   3  -8  -5   13.88    1.07
  -3   8   5   11.06    1.01
   3   8  -5   13.42    1.15
   3   8  -5   13.66    0.92
  -3   8   5   12.62    0.94
   2  -8  -5    5.04    0.72
  -2  -8   5    3.19    0.63
  -2  -8   5    2.34    0.47
   2   8  -5    3.22    0.67
  -2   8   5    4.97    0.78
  -2   8   5    3.50    0.52
   2   8  -5    3.72    0.47
   1  -8  -5    5.66    0.74
  -1  -8   5    4.39    0.39
  -1  -8   5    4.56    0.44
   1  -8  -5    5.41    0.64
  -1   8   5    4.46    0.72
  -1   8   5    4.90    0.62
   0  -8   5    3.36    0.31
   0  -8  -5    3.11    0.57
   0  -8   5    4.33    0.68
   0  -8   5    4.23    0.32
   0   8  -5    4.43    0.69
   0   8   5    3.97    0.57
   1  -8   5   11.49    0.94
  -1  -8  -5   11.49    0.87
   1  -8   5   10.89    0.56
   1  -8   5   10.23    0.54
   1   8   5    9.03    0.85
  -1   8  -5   12.28    1.11
   1   8   5   11.01    0.87
   2  -8   5   33.08    1.69
  -2  -8  -5   32.98    1.66
  -2   8  -5   35.00    1.77
   2   8   5   32.70    1.62
  -2   8  -5   32.55    1.26
   3  -8   5   21.38    1.16
  -3  -8  -5   21.76    1.44
  -3  -8  -5   22.37    1.30
   3  -8   5   20.12    1.34
   3   8   5   17.42    1.31
  -3   8  -5   20.74    1.13
  -3   8  -5   19.72    1.36
  -4  -8  -5    6.89    0.84
   4  -8   5    9.37    0.99
   4  -8   5    8.59    1.04
  -4  -8  -5    7.31    1.03
  -4   8  -5    8.98    1.12
   4   8   5    8.82    1.17
   5  -8   5   12.45    1.13
  -5  -8  -5    8.90    1.25
  -5  -8  -5   10.36    0.94
   5  -8   5   11.90    1.32
  -5   8  -5   12.43    1.41
   5   8   5   11.90    1.35
   6  -8   5    0.08    0.68
   6  -8   5   -0.40    0.80
  -6  -8  -5   -0.87    0.88
  -6  -8  -5    0.73    0.46
   6   8   5    1.01    0.76
  -6   8  -5   -0.18    0.78
  -7  -8  -5   10.09    1.62
   7  -8   5   11.71    1.27
   7   8   5   11.88    1.78
  -7   8  -5    8.40    1.52
  -8  -8  -5    7.08    1.77
   8  -8   5    6.27    1.48
   8  -9  -5    4.26    1.60
  -8  -9   5    5.66    1.65
   8   9  -5    8.02    1.65
  -8   9   5    7.76    1.57
   7  -9  -5    2.58    1.02
   7  -9  -5    5.04    1.36
  -7  -9   5    2.88    1.26
  -7   9   5    4.47    1.35
   7   9  -5    4.65    1.25
   6  -9  -5    0.14    0.94
  -6  -9   5    1.67    0.91
   6  -9  -5    0.89    0.80
  -6  -9   5    0.81    0.68
  -6   9   5    1.99    0.85
   6   9  -5    1.01    0.80
   5  -9  -5   -0.54    0.64
   5  -9  -5   -0.64    0.70
  -5  -9   5    0.64    0.52
  -5  -9   5    0.11    0.86
   5   9  -5    0.09    0.61
  -5   9   5   -0.20    0.60
   4  -9  -5    2.05    0.72
  -4  -9   5    2.03    0.56
  -4   9   5    0.46    0.59
   4   9  -5    0.32    0.70
  -4   9   5    0.72    0.64
   4   9  -5    1.26    0.55
  -3  -9   5   -0.23    0.40
   3  -9  -5    0.12    0.48
  -3   9   5    0.42    0.45
   3   9  -5   -0.45    0.36
   3   9  -5   -0.44    0.45
  -3   9   5   -0.30    0.49
  -2  -9   5   14.10    0.84
  -2  -9   5   14.68    1.11
   2  -9  -5   10.63    0.98
   2   9  -5   12.88    1.14
  -2   9   5   14.11    1.15
  -2   9   5   13.63    1.00
  -1  -9   5    0.49    0.29
  -1  -9   5    0.46    0.24
   1  -9  -5    0.10    0.39
  -1  -9   5    0.43    0.40
   1   9  -5   -0.09    0.38
  -1   9   5    0.04    0.43
  -1   9   5    0.21    0.37
   0  -9   5    3.15    0.68
   0  -9  -5    3.13    0.60
   0  -9   5    3.18    0.33
   0  -9   5    3.14    0.31
   0   9  -5    2.38    0.59
   0   9   5    2.68    0.51
   0   9   5    2.95    0.65
  -1  -9  -5   17.37    1.16
   1  -9   5   17.48    0.75
   1  -9   5   16.28    0.71
   1  -9   5   18.84    1.31
   1   9   5   17.14    1.13
  -1   9  -5   15.68    1.17
   1   9   5   12.52    1.13
   2  -9   5   20.13    1.00
   2  -9   5   22.79    1.48
  -2   9  -5   20.74    1.47
  -2   9  -5   20.74    0.97
  -3  -9  -5    1.34    0.58
  -3  -9  -5    2.00    0.68
   3  -9   5    0.97    0.60
   3  -9   5    1.43    0.48
  -3   9  -5    1.92    0.68
  -3   9  -5    0.58    0.51
   3   9   5    2.19    0.58
  -4  -9  -5   -0.32    0.58
   4  -9   5    1.12    0.65
   4  -9   5   -0.83    0.49
  -4  -9  -5    0.45    0.54
  -4   9  -5   -0.06    0.57
   4   9   5    0.88    0.69
   5  -9   5    1.49    0.68
   5  -9   5    1.90    0.74
  -5  -9  -5    0.56    0.63
  -5  -9  -5    1.09    0.86
   5   9   5    0.44    0.70
  -5   9  -5    1.84    0.88
   6  -9   5    0.78    0.73
   6  -9   5   -0.21    0.81
  -6  -9  -5    2.16    0.64
  -6  -9  -5    1.06    1.00
   6   9   5    1.34    0.87
  -6   9  -5    1.23    1.00
   7  -9   5    4.45    1.05
  -7  -9  -5    5.43    1.41
   7  -9   5    4.73    1.31
   7   9   5    1.76    1.13
  -7   9  -5    1.47    1.24
   8  -9   5    1.72    1.44
  -8  -9  -5   -0.78    1.40
  -8   9  -5    1.08    1.50
   8   9   5   -2.08    1.37
   7 -10  -5    2.08    1.11
  -7 -10   5   -0.09    1.17
   7 -10  -5   -1.44    1.05
   7  10  -5    2.44    1.23
  -7  10   5    1.17    1.14
   6 -10  -5    1.56    1.06
   6 -10  -5    2.58    1.24
  -6 -10   5    3.75    0.74
  -6 -10   5    2.14    1.07
  -6  10   5    1.67    0.99
   6  10  -5    1.33    0.98
   5 -10  -5    4.28    1.10
  -5 -10   5    6.21    1.20
  -5 -10   5    7.01    0.96
   5 -10  -5    5.65    1.02
  -5  10   5    7.37    1.14
   5  10  -5    6.15    1.02
   4 -10  -5   33.69    1.99
  -4 -10   5   33.20    1.77
   4  10  -5   27.92    1.96
  -4  10   5   33.91    1.81
   4  10  -5   31.60    1.73
   3 -10  -5    4.60    0.85
  -3 -10   5    6.00    0.94
   3  10  -5    4.61    0.92
   3  10  -5    6.38    0.75
  -3  10   5    6.00    0.97
  -3  10   5    5.28    0.79
  -2 -10   5    1.10    0.40
  -2 -10   5    1.23    0.54
  -2 -10   5    0.59    0.45
  -2  10   5    1.39    0.51
  -2  10   5    1.00    0.54
   2  10  -5    0.76    0.61
  -1 -10   5    1.96    0.67
   1 -10  -5    2.80    0.63
  -1 -10   5    1.61    0.39
  -1 -10   5    1.45    0.33
   1  10  -5    1.58    0.60
  -1  10   5    1.72    0.62
  -1  10   5    1.95    0.55
   0 -10   5    0.59    0.28
   0 -10  -5    0.83    0.47
   0 -10   5   -0.22    0.24
   0 -10   5    0.06    0.50
   0  10   5    0.06    0.40
   0  10   5    0.25    0.44
   0  10  -5    0.10    0.44
  -1 -10  -5   18.59    1.51
   1 -10   5   21.01    0.88
   1 -10   5   19.54    1.43
   1 -10   5   19.10    0.84
  -1  10  -5   22.21    1.48
   1  10   5   21.56    1.35
   2 -10   5   11.79    0.80
   2 -10   5   12.21    1.18
  -2 -10  -5   12.06    1.18
  -2 -10  -5   10.70    1.05
  -2  10  -5   11.87    1.33
   2  10   5   12.14    1.08
   3 -10   5    3.46    0.89
  -3 -10  -5    3.16    0.82
  -3 -10  -5    3.27    0.74
  -3 -10  -5    3.14    0.83
   3 -10   5    3.03    0.58
  -3  10  -5    4.23    0.72
  -3  10  -5    1.33    0.75
   4 -10   5    1.59    0.80
  -4 -10  -5    1.87    0.84
  -4 -10  -5    1.32    0.70
   4 -10   5    1.90    0.68
  -4  10  -5    0.99    0.79
   4  10   5    2.29    0.82
  -5 -10  -5    4.82    1.23
   5 -10   5    4.19    0.94
  -5 -10  -5    4.80    0.89
   5 -10   5    4.10    0.96
   5  10   5    2.64    0.92
  -5  10  -5    2.17    0.83
   6 -10   5    0.04    0.88
  -6 -10  -5   -0.27    1.02
  -6  10  -5    1.27    1.06
   6  10   5   -0.72    0.86
  -7 -10  -5    0.17    1.35
   7 -10   5    0.02    1.12
   7 -10   5    0.92    1.26
  -7  10  -5    1.79    1.32
   7  10   5    1.06    1.30
   7 -11  -5    2.46    1.31
  -7 -11   5    3.88    1.47
   7 -11  -5    3.90    1.52
  -7  11   5    0.63    1.31
   7  11  -5    4.36    1.38
  -6 -11   5    2.11    1.19
   6 -11  -5    0.84    1.03
  -6 -11   5   -0.32    0.77
   6 -11  -5    0.41    1.14
  -6  11   5    0.97    1.01
   6  11  -5    1.80    1.05
   5 -11  -5    1.31    0.87
  -5 -11   5    0.60    0.73
  -5 -11   5    0.66    1.03
   5 -11  -5    0.71    0.98
   5  11  -5    0.40    0.79
  -5  11   5   -0.52    0.80
   4 -11  -5    0.22    0.79
  -4 -11   5   -0.02    0.60
   4 -11  -5    0.83    0.96
   4  11  -5    0.16    0.74
   4  11  -5   -1.18    0.70
  -4  11   5   -0.14    0.65
   3 -11  -5    4.51    0.95
   3 -11  -5    4.91    0.96
  -3 -11   5    5.64    0.77
  -3 -11   5    5.54    0.95
  -3  11   5    6.42    0.98
   3  11  -5    5.40    1.02
   2 -11  -5    0.09    0.61
  -2 -11   5    0.14    0.42
  -2 -11   5    0.04    0.59
  -2 -11   5    0.85    0.63
  -2  11   5   -0.15    0.50
   2  11  -5    0.06    0.67
  -1 -11   5   -0.31    0.46
   1 -11  -5   -0.01    0.50
  -1 -11   5    0.05    0.54
  -1 -11   5   -0.52    0.41
   1  11  -5   -0.17    0.65
   0 -11  -5   -0.01    0.50
   0 -11   5    0.90    0.54
   0 -11  -5   -0.01    0.56
   0 -11   5    0.45    0.32
   0 -11   5    0.80    0.30
   0  11  -5    0.74    0.56
   0  11   5    1.31    0.61
  -1 -11  -5    1.03    0.57
   1 -11   5    0.61    0.33
   1 -11   5    1.08    0.35
   1 -11   5    0.37    0.54
  -1 -11  -5   -0.46    0.61
   1  11   5    0.59    0.60
  -1  11  -5    1.25    0.67
   2 -11   5   -0.63    0.42
   2 -11   5   -0.48    0.42
  -2 -11  -5    0.47    0.67
  -2 -11  -5    0.64    0.60
   2 -11   5    0.86    0.62
  -2  11  -5    0.24    0.67
   2  11   5    0.39    0.62
  -3 -11  -5    1.97    0.84
   3 -11   5    1.73    0.55
  -3 -11  -5    2.39    0.88
   3 -11   5    1.57    0.74
  -3 -11  -5    0.44    0.67
  -3  11  -5    2.79    0.93
  -3  11  -5    2.11    0.68
  -4 -11  -5    0.51    0.79
   4 -11   5    2.56    0.76
   4 -11   5    0.88    0.89
  -4 -11  -5    2.36    0.93
  -4 -11  -5    2.80    0.85
  -4  11  -5    1.36    0.96
  -5 -11  -5    3.50    1.23
   5 -11   5    4.13    0.98
  -5 -11  -5    4.33    0.97
   5 -11   5    3.51    0.95
   5  11   5    4.89    1.20
  -5  11  -5    4.69    1.15
   6 -11   5   -0.28    1.04
  -6 -11  -5   -1.31    1.07
   6 -11   5   -0.39    0.95
   6  11   5    0.84    1.09
  -6  11  -5    0.77    1.18
   7 -11   5    2.71    1.26
   7 -11   5    1.44    1.45
  -7 -11  -5    3.38    1.47
  -7  11  -5    2.00    1.50
   6 -12  -5   -0.35    1.09
  -6 -12   5    0.39    0.97
   6 -12  -5   -0.75    1.26
  -6  12   5   -1.71    1.08
  -5 -12   5   -1.16    1.05
   5 -12  -5   -1.48    0.99
  -5 -12   5    0.11    0.87
   5 -12  -5   -1.62    0.98
   5  12  -5   -1.23    0.86
  -5  12   5   -1.28    0.91
  -4 -12   5    0.71    0.80
   4 -12  -5    1.54    0.88
   4 -12  -5   -0.84    0.90
  -4 -12   5    1.07    0.80
   4  12  -5   -0.80    0.95
  -4  12   5    0.42    0.84
   3 -12  -5    7.65    1.09
   3 -12  -5    7.46    1.31
  -3 -12   5    6.08    0.87
  -3 -12   5    6.72    1.15
   3  12  -5    6.63    1.25
  -3  12   5    5.66    1.00
  -2 -12   5   11.34    0.92
   2 -12  -5   13.62    1.58
   2 -12  -5    8.95    1.18
  -2 -12   5    9.59    1.21
  -2  12   5   10.13    1.13
   2  12  -5   12.15    1.47
   1 -12  -5    1.60    0.67
  -1 -12   5    3.00    0.86
  -1 -12   5    2.45    0.52
  -1  12   5    2.49    0.75
   1  12  -5    2.06    0.83
   0 -12   5    2.22    0.79
   0 -12  -5    1.98    0.71
   0 -12   5    1.55    0.34
   0 -12   5    1.39    0.35
   0 -12  -5    1.42    0.87
   0  12  -5    2.88    0.91
   0  12   5    2.77    0.76
   1 -12   5   -0.06    0.31
   1 -12   5    0.18    0.32
   1 -12   5   -0.21    0.65
  -1 -12  -5    0.95    0.70
  -1 -12  -5    0.13    0.64
   1  12   5   -0.14    0.65
  -1  12  -5    0.34    0.66
  -2 -12  -5   -0.55    0.63
  -2 -12  -5   -1.25    0.64
   2 -12   5   -0.55    0.70
   2  12   5   -0.22    0.69
  -2  12  -5   -0.21    0.65
   3 -12   5    5.96    0.80
   3 -12   5    7.21    1.20
  -3 -12  -5    5.40    1.10
  -3 -12  -5    7.11    1.11
  -3 -12  -5    8.12    1.21
  -3  12  -5    7.20    1.24
  -4 -12  -5   21.56    2.00
   4 -12   5   21.07    1.50
  -4 -12  -5   19.86    1.67
  -4 -12  -5   22.81    1.92
   4 -12   5   21.12    1.91
  -4  12  -5   19.24    1.81
  -5 -12  -5    0.87    0.97
  -5 -12  -5   -0.73    1.16
  -5 -12  -5    0.41    1.10
   5 -12   5    0.31    0.95
   5 -12   5    1.34    0.95
  -5  12  -5    0.88    1.10
  -6 -12  -5   -0.19    1.30
   6 -12   5    0.71    1.08
   6  12   5   -0.14    1.20
  -6  12  -5    0.55    1.39
   6 -13  -5    1.24    1.45
  -6 -13   5    0.00    1.32
  -6 -13   5   -0.41    1.12
   6  13  -5    0.37    1.43
  -6  13   5   -1.70    1.26
  -5 -13   5    1.92    1.14
  -5 -13   5    2.54    1.11
   5 -13  -5    1.82    1.13
   5 -13  -5    2.66    1.24
  -5 -13   5    0.32    1.18
   4 -13  -5   -0.28    1.01
  -4 -13   5    1.81    0.93
  -4 -13   5    0.48    0.84
   4 -13  -5    1.07    1.11
  -4  13   5    0.90    1.00
   4  13  -5    1.21    1.18
  -3 -13   5    1.00    0.72
   3 -13  -5    0.46    0.91
   3 -13  -5    0.28    0.94
  -3 -13   5    1.84    0.88
  -3  13   5    1.45    0.89
   3  13  -5   -0.17    1.03
  -2 -13   5    3.82    0.98
   2 -13  -5    4.89    1.13
  -2 -13   5    3.66    0.64
   2 -13  -5    3.84    0.96
  -2  13   5    4.29    0.99
   2  13  -5    3.66    1.03
   1 -13  -5    2.41    1.00
  -1 -13   5    0.22    0.83
   1 -13  -5    2.53    0.86
  -1 -13   5    1.22    0.66
  -1  13   5    1.09    0.76
   1  13  -5    1.30    0.80
   0 -13  -5    3.26    1.00
   0 -13  -5    3.68    0.91
   0 -13   5    4.58    1.07
   0  13  -5    2.68    1.04
   0  13   5    3.73    0.89
   1 -13   5    2.14    0.81
  -1 -13  -5    1.37    0.92
  -1 -13  -5    1.42    0.77
  -1  13  -5    1.32    0.82
   1  13   5    1.18    0.80
  -2 -13  -5    9.83    1.29
   2 -13   5    7.54    1.24
  -2 -13  -5    5.61    1.16
  -2  13  -5   10.46    1.38
  -3 -13  -5    4.95    1.20
   3 -13   5    7.47    1.32
  -3 -13  -5    7.79    1.27
  -3 -13  -5    4.79    1.29
  -3  13  -5    6.63    1.35
  -4 -13  -5    1.47    1.04
  -4 -13  -5    1.74    1.06
  -4 -13  -5    2.26    1.21
   4 -13   5   -0.57    1.01
  -4  13  -5    2.10    1.20
  -5 -13  -5    1.71    1.35
  -5 -13  -5    2.58    1.52
   5 -13   5    1.97    1.10
  -5 -13  -5    2.33    1.19
  -5  13  -5    4.22    1.40
  -5 -14   5    0.90    1.14
   5 -14  -5    1.63    1.50
  -5 -14   5   -0.63    1.30
   5 -14  -5    2.09    1.41
  -5  14   5    0.38    1.38
   4 -14  -5   -2.69    1.27
  -4 -14   5    1.87    1.06
   4 -14  -5   -1.25    1.19
   4  14  -5    0.39    1.20
   3 -14  -5    4.02    1.23
   3 -14  -5    2.83    1.14
  -3 -14   5    4.38    1.17
   3  14  -5    0.89    1.21
  -3  14   5    4.07    1.19
   2 -14  -5    3.35    1.21
  -2 -14   5    4.84    1.08
   2 -14  -5    4.22    1.08
   2  14  -5    1.98    1.04
  -2  14   5    5.21    1.16
  -1 -14   5    0.86    0.89
   1 -14  -5   -0.09    0.90
   1 -14  -5   -0.48    0.86
   1  14  -5   -0.69    0.84
  -1  14   5    0.62    0.85
   0 -14  -5   12.53    1.73
   0 -14   5   15.69    1.79
   0 -14  -5   16.97    1.58
   0  14   5   15.14    1.57
   0  14  -5   15.81    1.82
  -1 -14  -5    5.62    1.27
  -1 -14  -5    6.79    1.11
   1 -14   5    5.37    1.35
  -1  14  -5    5.54    1.28
   1  14   5    4.07    1.16
   2 -14   5    0.36    1.08
  -2 -14  -5    1.01    0.93
  -2 -14  -5    1.22    0.99
  -2  14  -5    2.60    1.10
  -3 -14  -5    3.73    1.40
  -3 -14  -5    4.91    1.27
   3 -14   5    1.81    1.03
  -3  14  -5    3.97    1.23
  -4 -14  -5    2.49    1.40
  -4 -14  -5    3.81    1.34
  -4 -14  -5    7.25    1.42
  -4  14  -5    5.81    1.56
   3 -15  -5    0.82    1.31
   3 -15  -5   -0.46    1.19
  -3 -15   5   -1.28    1.14
   3  15  -5   -2.41    1.91
  -3  15   5    0.51    1.23
   2 -15  -5   -0.31    1.02
   2 -15  -5   -0.97    1.10
  -2 -15   5    1.88    1.15
   2  15  -5   -0.85    1.21
   1 -15  -5    1.04    1.14
  -1 -15   5   -0.32    1.00
   1 -15  -5    0.09    1.06
   1  15  -5    1.27    1.26
  -1  15   5    0.30    1.12
   0 -15  -5    7.72    1.32
   0 -15  -5    8.03    1.63
   0 -15   5    7.13    1.36
   0  15  -5    5.04    1.44
  -1 -15  -5    1.90    1.13
  -1 -15  -5    1.50    1.15
  -1  15  -5    1.50    1.29
   1  15   5    2.87    1.25
  -2 -15  -5    0.44    1.04
   2 -15   5    0.18    1.06
  -2 -15  -5    0.60    1.32
  -2 -15  -5   -0.16    1.13
  -2  15  -5    0.85    1.25
  -3 -15  -5   -1.21    1.37
  -3 -15  -5   -0.93    1.21
  -3 -15  -5   -1.69    1.30
   3 -15   5   -1.54    1.25
  -3  15  -5   -0.63    1.30
  -1 -16   5    1.27    1.13
   1 -16  -5   -1.41    1.23
  -1  16   5   -3.00    1.34
   0 -16   5    3.00    1.33
   0 -16  -5    4.95    1.44
   0  16  -5    5.86    1.59
   0  16   5    1.80    1.45
  -1 -16  -5    0.95    1.25
   1 -16   5    0.36    1.41
   1  16   5   -1.70    1.34
 -10   0   6    5.46    1.76
  10   0  -6    7.48    1.76
  -9   0   6   -0.63    1.03
   9   0  -6    0.55    1.18
  -8   0   6    3.40    1.00
   8   0  -6    1.47    0.89
  -7   0   6   -0.54    0.67
   7   0  -6    0.10    0.67
   7   0  -6    0.07    0.22
  -6   0   6    6.91    1.01
   6   0  -6    7.34    1.10
  -6   0   6    8.84    0.56
   6   0  -6    8.52    0.54
   5   0  -6   -0.09    0.22
   5   0  -6    0.08    0.49
  -5   0   6    0.24    0.35
   4   0  -6    2.11    0.51
  -4   0   6    2.67    0.49
   4   0  -6    1.44    0.25
  -4   0   6    2.18    0.31
   3   0  -6    0.78    0.20
  -3   0   6    0.28    0.21
   3   0  -6    0.14    0.24
  -3   0   6    0.83    0.20
  -3   0   6    0.97    0.30
  -2   0   6   55.70    1.75
  -2   0   6   53.96    1.76
   2   0  -6   53.67    1.70
   2   0  -6   54.03    1.89
  -2   0   6   55.58    1.72
  -2   0   6   57.27    1.89
  -1   0   6    0.76    0.14
  -1   0   6    0.42    0.14
   1   0  -6    0.48    0.16
   1   0  -6    1.03    0.16
   0   0  -6    9.82    0.46
   0   0   6   10.21    0.49
   0   0   6    9.91    0.48
   0   0  -6    9.44    0.47
   0   0  -6   10.12    0.43
   0   0   6   10.06    0.44
  -1   0  -6   -0.03    0.11
   1   0   6   -0.05    0.12
  -1   0  -6    0.09    0.13
   1   0   6   -0.01    0.10
   1   0   6    0.01    0.08
  -1   0  -6    0.08    0.10
  -2   0  -6    0.12    0.21
  -2   0  -6    0.20    0.20
   2   0   6    0.43    0.23
  -2   0  -6    0.52    0.13
   2   0   6    0.27    0.22
   2   0   6    0.83    0.16
   3   0   6    0.21    0.13
  -3   0  -6   -0.11    0.22
  -3   0  -6   -0.66    0.46
   3   0   6    0.34    0.25
  -3   0  -6    0.04    0.13
   4   0   6    2.38    0.51
   4   0   6    2.24    0.22
  -4   0  -6    1.71    0.48
  -5   0  -6    0.65    0.40
   5   0   6    0.12    0.38
  -6   0  -6    1.13    0.60
   6   0   6    1.20    0.61
  -7   0  -6   -0.14    0.73
   7   0   6    0.38    0.66
   8   0   6   14.80    1.87
  -8   0  -6   14.39    1.88
   9   0   6   -0.46    1.17
 -10  -1   6   -2.01    1.35
  10  -1  -6    0.07    1.36
 -10   1   6    1.66    1.42
  10   1  -6    1.67    1.49
  -9  -1   6    1.32    1.23
   9  -1  -6   -0.76    1.11
   9   1  -6    0.29    1.03
  -9   1   6   -2.21    1.06
   8  -1  -6    2.54    0.91
  -8  -1   6    0.29    0.91
  -8   1   6    2.19    1.08
   8   1  -6    1.98    0.98
   7  -1  -6    0.30    0.66
  -7  -1   6    0.66    0.60
   7  -1  -6   -0.09    0.32
  -7   1   6    0.20    0.31
   7   1  -6    0.59    0.62
  -7   1   6    0.53    0.67
  -6  -1   6   12.48    0.62
  -6  -1   6   13.96    1.22
   6  -1  -6   11.38    0.68
   6  -1  -6   10.04    1.29
   6   1  -6   12.58    0.62
  -6   1   6   14.08    1.22
  -6   1   6   12.49    0.73
   6   1  -6   12.25    1.40
  -5  -1   6    0.41    0.41
  -5  -1   6    0.20    0.20
   5  -1  -6    0.23    0.44
   5  -1  -6    0.36    0.26
  -5   1   6    0.09    0.36
   5   1  -6    0.22    0.22
  -5   1   6    0.20    0.22
   4  -1  -6   -0.11    0.28
   4  -1  -6    0.07    0.23
  -4  -1   6    0.82    0.22
  -4  -1   6    0.38    0.32
   4   1  -6    0.20    0.31
   4   1  -6    0.37    0.18
  -4   1   6    0.11    0.27
  -4   1   6    0.89    0.27
  -3  -1   6    6.26    0.44
  -3  -1   6    7.30    0.59
  -3  -1   6    7.91    0.64
  -3  -1   6    7.86    0.62
   3  -1  -6    8.32    0.50
   3  -1  -6    5.63    0.52
   3  -1  -6    7.00    0.63
  -3   1   6    6.81    0.52
  -3   1   6    5.81    0.67
   3   1  -6    8.66    0.69
  -3   1   6    6.03    0.52
   3   1  -6    7.28    0.44
   2  -1  -6    0.64    0.22
   2  -1  -6    0.14    0.14
  -2  -1   6    0.55    0.19
  -2  -1   6    0.53    0.16
   2  -1  -6    0.38    0.15
  -2  -1   6    0.24    0.16
  -2   1   6    0.60    0.16
   2   1  -6    0.24    0.14
  -2   1   6    0.32    0.22
   2   1  -6    0.27    0.19
   2   1  -6    0.13    0.19
  -2   1   6    0.38    0.14
  -1  -1   6   16.52    0.68
   1  -1  -6   16.54    0.74
  -1  -1   6   17.20    0.69
   1  -1  -6   17.95    0.71
  -1  -1   6   16.50    0.66
   1   1  -6   16.72    0.69
  -1   1   6   16.71    0.74
  -1   1   6   16.46    0.70
   1   1  -6   15.31    0.66
   1   1  -6   16.07    0.67
  -1   1   6   16.27    0.54
  -1   1   6   16.26    0.53
   0  -1   6    9.97    0.48
   0  -1  -6   10.78    0.53
   0  -1  -6   10.41    0.50
   0  -1  -6   10.12    0.38
   0  -1   6    9.85    0.49
   0   1   6    9.20    0.48
   0   1  -6    9.50    0.42
   0   1  -6    9.24    0.47
   0   1  -6    9.10    0.48
   0   1   6   10.51    0.54
   0   1   6    9.89    0.38
  -1  -1  -6    0.37    0.12
  -1  -1  -6    0.43    0.15
   1  -1   6    0.53    0.18
  -1  -1  -6    0.38    0.18
   1  -1   6    0.31    0.13
   1  -1   6    0.57    0.15
  -1   1  -6    0.47    0.15
   1   1   6    0.41    0.15
   1   1   6    0.44    0.14
  -1   1  -6    0.48    0.15
   1   1   6    0.31    0.15
  -1   1  -6    0.75    0.20
   2  -1   6    1.00    0.17
  -2  -1  -6    0.68    0.25
   2  -1   6    1.01    0.27
  -2  -1  -6    1.06    0.16
   2  -1   6    0.94    0.27
  -2  -1  -6    1.13    0.30
   2   1   6    1.22    0.19
  -2   1  -6    1.03    0.30
   2   1   6    0.74    0.28
  -2   1  -6    0.81    0.18
   2   1   6    0.60    0.23
  -2   1  -6    1.05    0.28
   3  -1   6    4.48    0.33
   3  -1   6    4.12    0.55
  -3  -1  -6    4.25    0.27
  -3  -1  -6    3.27    0.51
   3   1   6    3.76    0.28
  -3   1  -6    2.82    0.50
  -3   1  -6    4.01    0.34
  -3   1  -6    3.73    0.57
   3   1   6    4.25    0.60
   4  -1   6   12.37    0.94
   4  -1   6   12.22    0.59
  -4  -1  -6   14.47    1.02
   4  -1   6   13.12    0.56
  -4   1  -6   13.19    1.03
   4   1   6   14.35    1.02
   4   1   6   12.48    0.44
   5  -1   6    3.05    0.27
  -5  -1  -6    2.80    0.66
   5  -1   6    2.71    0.27
   5  -1   6    2.19    0.59
  -5   1  -6    3.59    0.75
   5   1   6    2.33    0.65
   6  -1   6    0.31    0.59
  -6  -1  -6    0.21    0.52
   6   1   6    0.12    0.49
  -6   1  -6   -0.35    0.52
   7  -1   6   13.36    1.62
   7   1   6   15.02    1.92
   8  -1   6    0.76    0.87
  -8  -1  -6    1.22    1.03
   8   1   6   -0.18    0.86
  -8   1  -6    3.54    1.16
   9  -1   6    0.94    1.29
   9  -2  -6    2.82    1.32
  -9  -2   6    3.68    1.40
  -9   2   6    4.39    1.23
   9   2  -6    3.21    1.31
   8  -2  -6    1.27    0.93
  -8  -2   6    1.32    0.88
   8  -2  -6    1.42    0.37
   8   2  -6   -0.06    0.76
   7  -2  -6    0.84    0.71
  -7  -2   6   -0.23    0.67
  -7   2   6   -0.14    0.66
  -7   2   6    0.33    0.37
   7   2  -6    0.13    0.61
   6  -2  -6   12.27    0.81
  -6  -2   6   10.35    1.23
   6  -2  -6   15.37    1.40
  -6  -2   6   12.48    0.60
  -6   2   6   11.49    1.08
   6   2  -6   11.20    1.32
  -6   2   6   12.55    0.80
   6   2  -6   12.15    0.62
  -5  -2   6    4.07    0.41
   5  -2  -6    4.23    0.50
   5  -2  -6    3.41    0.74
   5   2  -6    3.37    0.40
  -5   2   6    5.07    0.75
  -5   2   6    4.29    0.51
   4  -2  -6    0.49    0.35
  -4  -2   6    0.09    0.18
   4  -2  -6   -0.22    0.25
  -4  -2   6   -0.20    0.28
   4  -2  -6    0.21    0.31
   4   2  -6   -0.21    0.19
  -4   2   6   -0.09    0.23
   4   2  -6    0.29    0.34
  -4   2   6    0.00    0.20
  -3  -2   6  118.15    3.50
   3  -2  -6  117.65    3.46
  -3  -2   6  120.68    3.69
   3  -2  -6  121.82    3.83
  -3  -2   6  118.20    3.73
   3  -2  -6  114.47    3.51
  -3  -2   6  118.05    3.68
  -3   2   6  118.06    3.50
   3   2  -6  121.65    3.39
   3   2  -6  121.81    3.74
  -3   2   6  115.87    3.94
  -3   2   6  121.40    3.55
  -2  -2   6   31.77    1.23
  -2  -2   6   30.08    1.18
  -2  -2   6   31.00    1.10
   2  -2  -6   30.67    1.06
   2  -2  -6   31.72    1.31
   2  -2  -6   29.94    1.17
   2   2  -6   30.35    1.24
  -2   2   6   31.36    1.43
  -2   2   6   30.45    1.06
  -2   2   6   30.67    1.18
   2   2  -6   31.27    1.22
   2   2  -6   30.64    1.11
  -1  -2   6    2.41    0.30
   1  -2  -6    1.65    0.11
  -1  -2   6    2.05    0.30
   1  -2  -6    1.97    0.29
  -1  -2   6    2.06    0.23
   1   2  -6    1.86    0.29
   1   2  -6    1.88    0.28
  -1   2   6    2.05    0.12
   1   2  -6    1.75    0.22
  -1   2   6    1.72    0.28
   0  -2  -6   91.76    2.50
   0  -2   6   94.37    2.74
   0  -2  -6   97.68    2.80
   0  -2  -6   93.37    2.70
   0  -2   6   90.15    2.69
   0  -2  -6   91.13    2.46
   0   2   6   90.86    2.71
   0   2  -6   89.09    2.48
   0   2  -6   91.25    2.48
   0   2   6   93.87    2.77
   0   2  -6   90.81    2.70
   0   2  -6   96.13    2.75
  -1  -2  -6   -0.10    0.17
   1  -2   6    0.15    0.13
  -1  -2  -6    0.13    0.11
   1  -2   6   -0.05    0.17
  -1  -2  -6    0.21    0.13
   1  -2   6    0.06    0.11
   1   2   6    0.00    0.13
   1   2   6    0.01    0.11
  -1   2  -6    0.14    0.11
  -1   2  -6    0.16    0.19
   1   2   6    0.11    0.14
  -1   2  -6    0.17    0.16
  -2  -2  -6    6.90    0.62
   2  -2   6    7.84    0.53
  -2  -2  -6    6.91    0.41
   2  -2   6    5.97    0.43
  -2  -2  -6    6.94    0.53
   2  -2   6    8.22    0.62
  -2   2  -6    8.42    0.64
  -2   2  -6    6.75    0.47
   2   2   6    7.24    0.55
  -2   2  -6    7.73    0.55
   2   2   6    8.05    0.61
   2   2   6    6.95    0.41
  -3  -2  -6   74.22    2.13
   3  -2   6   77.31    2.72
  -3  -2  -6   76.83    2.64
   3  -2   6   75.85    2.58
  -3   2  -6   74.65    2.59
   3   2   6   71.62    2.66
  -3   2  -6   72.65    2.68
   3   2   6   73.90    2.15
  -3   2  -6   75.55    2.31
  -4  -2  -6    8.08    0.33
   4  -2   6    8.19    0.81
   4  -2   6    7.70    0.55
  -4  -2  -6    8.54    0.80
   4  -2   6    7.41    0.55
   4   2   6    8.39    0.98
  -4   2  -6    8.38    0.96
   4   2   6    8.59    0.35
   5  -2   6    1.29    0.31
   5  -2   6    1.97    0.30
   5  -2   6    1.46    0.51
  -5  -2  -6    1.01    0.53
   5   2   6    1.11    0.49
  -5   2  -6    2.28    0.58
   6  -2   6    3.54    0.34
   6  -2   6    3.87    0.82
  -6  -2  -6    5.13    0.99
   6  -2   6    3.52    0.34
  -6   2  -6    5.49    0.99
   6   2   6    2.29    0.76
   7  -2   6   -0.32    0.68
  -7   2  -6    0.90    1.33
   7   2   6    0.23    0.79
  -8  -2  -6    3.16    1.13
   8  -2   6    2.97    1.18
  -8   2  -6    2.61    1.05
   8   2   6    2.98    1.14
   9  -2   6    1.12    1.25
  -9  -2  -6    1.19    1.21
  -9   2  -6    1.39    1.36
   9   2   6    1.55    1.15
   9  -3  -6    0.67    1.20
  -9  -3   6    6.96    1.49
  -9   3   6    2.22    1.18
   9   3  -6    1.48    1.17
   8  -3  -6    4.64    1.29
  -8  -3   6    5.41    1.28
   8  -3  -6    5.29    0.68
   8   3  -6    2.58    1.07
  -7  -3   6    2.36    0.98
   7  -3  -6    1.49    0.88
   7  -3  -6    1.50    0.58
  -7   3   6    2.80    0.87
  -7   3   6    2.16    0.53
   7   3  -6    2.84    0.84
   6  -3  -6    3.82    0.95
  -6  -3   6    1.77    0.65
  -6  -3   6    2.46    0.32
   6   3  -6    3.19    0.76
   6   3  -6    2.57    0.38
  -6   3   6    2.81    0.76
  -6   3   6    3.03    0.55
  -5  -3   6    0.85    0.49
   5  -3  -6    2.76    0.72
  -5  -3   6    2.11    0.37
   5  -3  -6    1.82    0.42
  -5   3   6    1.61    0.40
   5   3  -6    2.06    0.37
  -5   3   6    1.83    0.52
   4  -3  -6   13.52    1.05
  -4  -3   6   15.17    0.72
   4  -3  -6   14.50    0.94
  -4  -3   6   13.17    1.02
   4  -3  -6   14.55    0.83
   4   3  -6   12.57    0.99
  -4   3   6   13.07    0.82
  -4   3   6   15.08    0.93
   4   3  -6   15.39    0.76
   3  -3  -6    2.50    0.41
  -3  -3   6    3.36    0.37
  -3  -3   6    3.05    0.50
   3  -3  -6    2.86    0.51
   3  -3  -6    3.43    0.44
   3   3  -6    3.79    0.53
   3   3  -6    3.07    0.39
   3   3  -6    3.32    0.46
  -3   3   6    3.55    0.47
  -3   3   6    3.54    0.46
   2  -3  -6   52.52    1.65
  -2  -3   6   54.06    1.75
  -2  -3   6   52.44    1.77
   2  -3  -6   51.49    1.80
   2  -3  -6   53.86    1.96
  -2  -3   6   53.63    1.91
  -2   3   6   51.77    1.65
  -2   3   6   53.78    1.86
   2   3  -6   52.68    1.78
  -2   3   6   53.16    1.92
   2   3  -6   54.31    1.93
   2   3  -6   51.84    1.76
   1  -3  -6   40.85    1.21
  -1  -3   6   41.82    1.28
   1  -3  -6   43.78    1.57
  -1  -3   6   42.95    1.54
   1  -3  -6   44.46    1.52
  -1  -3   6   41.18    1.46
   1   3  -6   40.08    1.53
  -1   3   6   41.75    1.54
   1   3  -6   40.02    1.47
   1   3  -6   43.18    1.30
  -1   3   6   43.17    1.53
  -1   3   6   42.35    1.20
   0  -3  -6   36.58    1.11
   0  -3  -6   36.07    1.10
   0  -3   6   35.52    1.32
   0  -3   6   39.15    1.40
   0  -3  -6   34.74    1.36
   0  -3  -6   36.46    1.32
   0   3  -6   33.62    1.31
   0   3   6   39.07    1.37
   0   3  -6   36.48    1.38
   0   3   6   36.94    1.38
   1  -3   6   48.42    1.66
  -1  -3  -6   48.01    1.61
  -1  -3  -6   48.25    1.59
   1  -3   6   49.63    1.78
  -1  -3  -6   48.95    1.60
   1  -3   6   49.44    1.47
  -1   3  -6   47.11    1.67
   1   3   6   49.49    1.77
  -1   3  -6   48.49    1.76
  -1   3  -6   49.80    1.49
   2  -3   6  130.72    3.76
  -2  -3  -6  132.70    4.01
  -2  -3  -6  130.31    3.88
   2  -3   6  133.15    3.78
   2  -3   6  125.21    3.95
  -2  -3  -6  129.70    3.65
  -2   3  -6  127.31    3.77
  -2   3  -6  131.44    3.81
   2   3   6  125.62    3.67
  -2   3  -6  128.73    3.99
   2   3   6  127.66    3.98
   3  -3   6    4.80    0.58
  -3  -3  -6    3.57    0.56
  -3  -3  -6    3.90    0.35
   3  -3   6    3.90    0.43
   3   3   6    3.03    0.54
  -3   3  -6    5.22    0.69
   3   3   6    3.80    0.35
  -3   3  -6    3.66    0.55
   4  -3   6   39.94    1.80
  -4  -3  -6   39.79    1.23
  -4  -3  -6   39.18    1.87
   4  -3   6   39.22    1.52
   4  -3   6   40.57    1.47
   4   3   6   42.31    1.96
   4   3   6   40.75    1.26
  -4   3  -6   40.31    1.92
   5  -3   6    0.24    0.25
  -5  -3  -6    0.04    0.42
   5  -3   6    0.65    0.49
  -5   3  -6   -0.12    0.43
   5   3   6   -0.19    0.42
   6  -3   6    0.00    0.49
  -6  -3  -6   -0.15    0.50
   6  -3   6    0.39    0.41
   6  -3   6   -0.06    0.27
   6   3   6    0.41    0.60
  -6   3  -6   -0.04    0.62
   7  -3   6    0.32    0.83
  -7  -3  -6   -0.34    0.74
   7  -3   6    0.62    0.29
  -7   3  -6   -0.65    0.70
   7   3   6   -0.10    0.70
  -8  -3  -6    3.00    1.11
   8  -3   6    2.26    1.15
  -8   3  -6    2.39    1.09
   8   3   6    3.66    1.08
  -9  -3  -6   -0.62    1.27
   9  -3   6   -1.31    1.25
   9   3   6    0.40    1.22
  -9   3  -6   -0.99    1.12
   9  -4  -6    1.60    1.36
  -9  -4   6    0.79    1.20
  -9   4   6    1.81    1.32
   9   4  -6    1.10    1.14
  -8  -4   6    0.98    1.05
   8  -4  -6    0.15    0.86
   8  -4  -6    0.03    0.61
  -8   4   6   -0.77    0.93
   8   4  -6    1.31    1.00
  -7  -4   6    3.32    0.95
   7  -4  -6    2.24    0.83
  -7   4   6    2.76    0.99
   7   4  -6    2.89    0.85
  -6  -4   6    2.91    0.77
   6  -4  -6    2.87    0.85
  -6  -4   6    2.61    0.42
  -6   4   6    3.18    0.56
   6   4  -6    2.56    0.73
  -6   4   6    2.62    0.73
  -5  -4   6   -0.17    0.40
  -5  -4   6    0.19    0.25
   5  -4  -6    0.33    0.47
  -5   4   6   -0.36    0.32
  -5   4   6    0.42    0.46
   5   4  -6   -0.27    0.48
   5   4  -6    0.18    0.34
  -4  -4   6   11.13    0.95
  -4  -4   6   10.96    0.64
   4  -4  -6   11.88    1.00
   4   4  -6   11.00    0.72
  -4   4   6    9.64    0.77
  -4   4   6   10.53    0.81
   4   4  -6    9.88    0.84
   3  -4  -6  144.63    4.24
  -3  -4   6  142.98    4.18
  -3  -4   6  144.39    4.39
   3  -4  -6  145.79    4.61
  -3   4   6  145.73    4.39
   3   4  -6  150.17    4.41
   3   4  -6  143.74    4.23
  -3   4   6  147.57    4.26
   3   4  -6  147.72    4.58
   2  -4  -6  112.98    3.61
   2  -4  -6  115.83    3.52
   2  -4  -6  113.74    3.27
  -2  -4   6  114.06    3.36
  -2  -4   6  120.29    3.81
  -2  -4   6  114.71    3.42
  -2   4   6  115.68    3.27
   2   4  -6  117.13    3.64
   2   4  -6  116.86    3.46
   2   4  -6  113.80    3.36
  -2   4   6  107.79    3.52
  -2   4   6  114.49    3.55
   1  -4  -6    2.84    0.26
  -1  -4   6    2.87    0.45
  -1  -4   6    2.82    0.23
   1  -4  -6    2.50    0.41
   1  -4  -6    3.07    0.42
  -1  -4   6    3.38    0.42
  -1   4   6    2.48    0.40
   1   4  -6    2.41    0.22
   1   4  -6    3.39    0.47
   1   4  -6    2.37    0.40
  -1   4   6    3.40    0.45
  -1   4   6    2.82    0.25
   0  -4  -6    1.19    0.19
   0  -4   6    1.11    0.27
   0  -4   6    1.54    0.34
   0  -4  -6    1.11    0.27
   0  -4  -6    1.06    0.27
   0   4   6    1.14    0.25
   0   4  -6    1.38    0.31
   0   4  -6    0.98    0.27
   0   4   6    1.45    0.21
   1  -4   6  178.01    5.41
  -1  -4  -6  185.63    5.20
   1  -4   6  193.43    5.36
  -1  -4  -6  193.82    5.45
  -1  -4  -6  191.71    5.22
   1  -4   6  186.54    4.97
  -1   4  -6  185.22    5.43
  -1   4  -6  185.30    5.37
   1   4   6  189.99    5.31
  -1   4  -6  191.07    4.98
  -2  -4  -6   30.32    1.33
   2  -4   6   31.96    1.21
  -2  -4  -6   32.94    1.38
   2  -4   6   32.02    1.31
  -2  -4  -6   31.99    1.22
  -2   4  -6   32.74    1.23
   2   4   6   31.35    1.44
  -2   4  -6   30.85    1.33
  -2   4  -6   32.01    1.46
   2   4   6   29.45    1.21
   3  -4   6    0.86    0.30
  -3  -4  -6    0.03    0.28
   3  -4   6    0.75    0.26
   3  -4   6   -0.04    0.29
  -3  -4  -6   -0.14    0.21
  -3   4  -6   -0.32    0.33
   3   4   6    0.31    0.34
   3   4   6    0.08    0.21
  -3   4  -6    0.35    0.32
   4  -4   6    0.38    0.26
   4  -4   6    0.76    0.38
   4  -4   6    0.36    0.37
  -4  -4  -6    0.56    0.40
  -4  -4  -6    0.57    0.21
  -4   4  -6    0.29    0.41
   4   4   6    0.14    0.20
   4   4   6   -0.27    0.34
   5  -4   6    6.14    0.76
  -5  -4  -6    5.79    0.88
   5  -4   6    7.38    0.97
   5  -4   6    6.06    0.63
  -5   4  -6    4.47    0.88
   5   4   6    7.63    1.05
  -6  -4  -6    9.76    1.26
   6  -4   6   11.45    0.96
   6  -4   6   11.61    0.79
   6  -4   6   12.75    1.43
  -6   4  -6   10.55    1.36
   6   4   6   10.72    1.31
   7  -4   6   -0.30    0.38
  -7  -4  -6    0.30    0.76
   7  -4   6   -0.48    0.77
  -7   4  -6    0.54    0.82
   7   4   6    0.86    0.74
  -8  -4  -6    2.70    0.98
   8  -4   6   -0.36    1.01
   8   4   6    0.00    1.06
  -8   4  -6    1.93    1.15
  -9  -4  -6    0.50    1.40
   9  -4   6   -1.39    1.89
  -9   4  -6    1.75    1.54
   9   4   6    0.56    1.27
   9  -5  -6    1.29    1.51
   9   5  -6    0.59    1.19
  -9   5   6   -0.02    1.08
   8  -5  -6   -0.12    0.67
  -8  -5   6    0.33    0.94
   8  -5  -6    1.67    1.22
   8   5  -6   -1.67    0.94
  -8   5   6   -1.23    0.91
   7  -5  -6    1.29    0.92
  -7  -5   6    2.68    0.91
  -7  -5   6    1.02    0.30
  -7   5   6    0.88    0.80
   7   5  -6    1.49    0.83
  -6  -5   6    0.13    0.31
  -6  -5   6    0.51    0.61
   6  -5  -6    0.00    0.60
  -6   5   6    0.47    0.57
  -6   5   6    1.33    0.50
   6   5  -6    1.12    0.66
  -5  -5   6    1.43    0.58
   5  -5  -6    2.34    0.70
  -5  -5   6    1.08    0.31
  -5   5   6    1.25    0.52
  -5   5   6    1.94    0.51
   5   5  -6    1.15    0.53
  -4  -5   6   17.62    0.93
   4  -5  -6   19.94    1.33
  -4  -5   6   19.90    1.30
   4   5  -6   21.45    1.25
  -4   5   6   19.97    1.13
  -4   5   6   19.43    1.14
   4   5  -6   18.20    1.06
   3  -5  -6   31.77    1.37
   3  -5  -6   31.19    1.60
  -3  -5   6   33.08    1.45
  -3  -5   6   35.68    1.39
  -3   5   6   35.19    1.40
   3   5  -6   33.96    1.45
   3   5  -6   35.98    1.68
  -3   5   6   31.99    1.51
   3   5  -6   34.31    1.44
  -2  -5   6   24.68    1.09
  -2  -5   6   22.44    0.97
   2  -5  -6   21.34    0.93
   2  -5  -6   23.40    1.19
  -2   5   6   20.88    1.12
  -2   5   6   22.25    0.93
   2   5  -6   21.85    1.10
   2   5  -6   20.71    0.94
   2   5  -6   23.46    1.22
   1  -5  -6   67.53    2.37
  -1  -5   6   67.38    2.33
  -1  -5   6   66.53    1.95
   1  -5  -6   68.21    2.08
  -1   5   6   68.62    2.07
   1   5  -6   69.81    1.94
   1   5  -6   71.56    2.46
  -1   5   6   70.99    2.36
   1   5  -6   69.87    2.39
  -1   5   6   66.85    2.39
   0  -5   6   42.78    1.63
   0  -5  -6   38.79    1.59
   0  -5  -6   37.54    1.57
   0  -5  -6   40.09    1.61
   0  -5  -6   40.29    1.36
   0   5   6   40.70    1.38
   0   5   6   40.96    1.62
   0   5  -6   43.00    1.68
  -1  -5  -6  156.97    4.61
  -1  -5  -6  153.89    4.70
  -1  -5  -6  155.44    4.51
  -1  -5  -6  154.15    4.47
  -1  -5  -6  153.06    4.70
   1  -5   6  154.61    4.17
   1  -5   6  163.07    4.69
  -1   5  -6  161.34    4.77
  -1   5  -6  161.31    4.16
   1   5   6  157.31    4.63
  -2  -5  -6    4.68    0.62
  -2  -5  -6    4.03    0.53
   2  -5   6    4.02    0.55
   2  -5   6    4.45    0.42
  -2  -5  -6    3.99    0.60
   2   5   6    4.54    0.51
  -2   5  -6    4.62    0.65
   2   5   6    4.89    0.64
  -2   5  -6    4.76    0.44
  -3  -5  -6   32.87    1.32
   3  -5   6   33.57    1.48
   3  -5   6   35.15    1.47
  -3  -5  -6   32.32    1.59
  -3   5  -6   33.18    1.67
   3   5   6   36.17    1.37
  -3   5  -6   34.37    1.47
   3   5   6   33.60    1.65
   4  -5   6    2.94    0.57
  -4  -5  -6    2.10    0.37
   4  -5   6    1.54    0.42
  -4  -5  -6    3.05    0.70
  -4   5  -6    2.67    0.71
   4   5   6    1.90    0.53
   5  -5   6    0.49    0.37
  -5  -5  -6    1.02    0.57
  -5  -5  -6    0.62    0.24
  -5  -5  -6    0.62    0.27
   5  -5   6    0.50    0.53
   5   5   6    0.90    0.50
  -5   5  -6    0.34    0.54
   6  -5   6    0.94    0.62
  -6  -5  -6    0.07    0.62
   6  -5   6    0.17    0.44
  -6   5  -6   -0.04    0.67
   6   5   6   -0.50    0.59
   7  -5   6   11.34    1.52
  -7  -5  -6    9.80    1.47
   7  -5   6   10.13    0.91
  -7   5  -6   10.96    1.57
   7   5   6   10.56    1.47
  -8  -5  -6    0.71    1.06
   8  -5   6    1.60    1.18
  -8   5  -6    0.42    1.11
   8   5   6    1.85    1.07
  -9  -5  -6    2.05    1.37
  -9   5  -6    0.40    1.41
   9   5   6    0.14    1.29
  -9  -6   6    0.38    1.26
   9  -6  -6    0.15    1.45
  -9   6   6    2.33    1.39
   9   6  -6   -0.03    1.54
   8  -6  -6   -0.06    1.12
   8  -6  -6    0.22    0.79
  -8  -6   6    0.74    1.12
   8   6  -6    1.21    1.07
  -8   6   6   -0.82    0.99
   7  -6  -6    3.05    0.76
  -7  -6   6    2.96    1.05
   7  -6  -6    2.98    1.06
   7   6  -6    3.38    0.99
  -7   6   6    4.31    1.00
  -6  -6   6    3.78    0.65
   6  -6  -6    2.88    0.89
  -6  -6   6    2.15    0.46
  -6  -6   6    1.14    0.72
  -6   6   6    2.60    0.79
   6   6  -6    2.50    0.82
  -6   6   6    3.56    0.75
   5  -6  -6    2.55    0.72
  -5  -6   6    1.34    0.63
  -5  -6   6    2.52    0.47
  -5   6   6    2.04    0.56
   5   6  -6    2.18    0.56
   4  -6  -6    2.47    0.63
  -4  -6   6    2.20    0.42
  -4   6   6    2.17    0.52
   4   6  -6    2.19    0.54
  -4   6   6    1.55    0.48
  -3  -6   6    2.36    0.42
   3  -6  -6    2.25    0.51
  -3  -6   6    2.30    0.51
   3  -6  -6    1.13    0.42
  -3   6   6    2.15    0.48
   3   6  -6    2.60    0.46
  -3   6   6    1.47    0.35
   3   6  -6    2.23    0.58
   2  -6  -6   42.87    1.82
   2  -6  -6   43.22    1.58
  -2  -6   6   43.59    1.73
  -2  -6   6   43.34    1.56
   2   6  -6   44.04    1.53
   2   6  -6   42.13    1.88
  -2   6   6   42.96    1.56
  -2   6   6   43.60    1.86
   1  -6  -6   11.11    0.65
  -1  -6   6   10.95    0.78
   1  -6  -6   10.80    0.79
  -1  -6   6   11.32    0.51
  -1   6   6   12.17    0.85
  -1   6   6   11.28    0.71
   1   6  -6   11.86    0.88
   0  -6  -6   -0.04    0.25
   0  -6  -6   -0.39    0.20
   0  -6   6    0.31    0.26
   0   6   6    0.08    0.19
   0   6  -6    0.34    0.28
   0   6   6    0.31    0.25
   1  -6   6    0.64    0.15
   1  -6   6    0.55    0.28
  -1  -6  -6    0.33    0.29
  -1  -6  -6    0.42    0.29
   1   6   6    0.82    0.30
  -1   6  -6    0.46    0.14
   1   6   6    1.11    0.35
  -1   6  -6    1.21    0.36
   2  -6   6    2.40    0.35
  -2  -6  -6    1.47    0.43
   2  -6   6    3.03    0.51
   2   6   6    1.62    0.41
  -2   6  -6    1.56    0.44
  -2   6  -6    1.56    0.33
   2   6   6    2.18    0.43
   3  -6   6    4.99    0.64
  -3  -6  -6    4.24    0.56
   3  -6   6    4.28    0.57
  -3  -6  -6    3.99    0.66
  -3   6  -6    5.20    0.91
   3   6   6    4.30    0.74
   3   6   6    5.30    0.62
  -3   6  -6    4.79    0.64
   4  -6   6    6.40    0.81
  -4  -6  -6    7.50    1.01
  -4  -6  -6    7.42    0.66
   4  -6   6    6.91    0.80
  -4  -6  -6    8.41    0.70
   4   6   6    9.65    1.12
  -4   6  -6    6.87    0.97
   5  -6   6    5.29    0.71
   5  -6   6    4.86    0.84
  -5  -6  -6    5.59    1.00
  -5  -6  -6    4.71    0.53
  -5  -6  -6    5.09    0.53
  -5   6  -6    5.06    0.97
   5   6   6    5.73    1.01
   6  -6   6    0.50    0.60
  -6  -6  -6   -0.41    0.78
   6  -6   6    0.12    0.49
  -6   6  -6    0.34    0.72
   6   6   6   -0.89    0.61
   7  -6   6    0.60    0.78
  -7  -6  -6    0.71    0.85
   7  -6   6    1.08    0.61
  -7   6  -6    0.39    0.86
   7   6   6    0.07    0.92
  -8  -6  -6   -1.26    1.19
   8  -6   6   -0.04    1.18
  -8   6  -6   -0.63    1.19
   8   6   6   -0.61    1.02
   9  -7  -6    3.66    1.70
  -9  -7   6    2.08    1.70
  -9   7   6    5.46    1.59
   9   7  -6    5.70    1.49
   8  -7  -6    6.12    1.43
   8  -7  -6    5.33    1.10
  -8  -7   6    2.93    1.23
   8   7  -6    5.29    1.31
  -8   7   6    3.57    1.33
   7  -7  -6   -0.31    0.96
   7  -7  -6    0.34    0.65
  -7  -7   6   -0.42    0.46
  -7  -7   6    0.27    0.97
  -7   7   6    0.05    0.81
   7   7  -6   -0.39    0.94
  -6  -7   6    0.17    0.40
  -6  -7   6   -0.14    0.67
   6  -7  -6    0.60    0.77
  -6   7   6   -0.69    0.65
   6   7  -6    0.36    0.71
  -6   7   6    0.44    0.55
  -5  -7   6    3.52    0.84
   5  -7  -6    2.94    0.82
  -5  -7   6    3.20    0.54
   5   7  -6    4.47    0.84
  -5   7   6    1.98    0.63
   4  -7  -6    0.59    0.49
  -4  -7   6    0.54    0.34
   4   7  -6    0.30    0.40
   4   7  -6   -0.30    0.42
  -4   7   6    0.46    0.40
  -4   7   6    0.34    0.40
   3  -7  -6   -0.29    0.45
  -3  -7   6   -0.82    0.43
  -3  -7   6    0.15    0.30
   3  -7  -6   -0.37    0.36
   3   7  -6    0.19    0.33
  -3   7   6    0.21    0.39
  -3   7   6    0.33    0.33
   3   7  -6    0.55    0.43
   2  -7  -6   70.48    2.43
  -2  -7   6   73.34    2.62
   2  -7  -6   73.46    2.69
  -2  -7   6   72.62    2.34
  -2   7   6   73.89    2.42
  -2   7   6   71.20    2.74
   2   7  -6   73.36    2.80
   1  -7  -6   12.10    0.88
  -1  -7   6   11.93    0.51
  -1  -7   6   11.34    0.54
  -1  -7   6   11.50    0.86
  -1   7   6   11.51    0.71
  -1   7   6   11.80    0.91
   1   7  -6   10.53    0.88
   0  -7   6    0.73    0.34
   0  -7  -6    0.43    0.31
   0  -7  -6    0.78    0.34
   0   7   6    0.15    0.24
   0   7   6    0.68    0.36
   0   7  -6    0.49    0.34
  -1  -7  -6    1.24    0.40
   1  -7   6    2.15    0.22
  -1  -7  -6    2.55    0.50
   1  -7   6    2.30    0.48
  -1   7  -6    2.19    0.53
   1   7   6    3.11    0.54
   1   7   6    2.03    0.41
   2  -7   6    6.10    0.50
   2  -7   6    7.41    0.72
  -2  -7  -6    7.10    0.82
  -2   7  -6    6.13    0.50
   2   7   6    6.13    0.72
  -2   7  -6    5.66    0.78
  -3  -7  -6   13.54    1.11
   3  -7   6   13.08    0.87
  -3   7  -6   12.69    1.08
  -3   7  -6   13.77    0.89
   3   7   6   13.25    1.10
   3   7   6   13.01    0.92
   4  -7   6   22.01    1.33
  -4  -7  -6   20.75    1.50
   4  -7   6   19.20    1.25
  -4  -7  -6   22.24    1.19
  -4   7  -6   22.35    1.55
   4   7   6   18.56    1.39
   5  -7   6    2.51    0.63
   5  -7   6    4.55    0.85
  -5  -7  -6    3.83    0.93
  -5  -7  -6    3.90    0.58
  -5  -7  -6    3.50    0.61
   5   7   6    5.22    1.02
  -5   7  -6    3.14    0.91
   6  -7   6    4.83    0.81
   6  -7   6    6.67    1.13
  -6   7  -6    6.49    1.38
  -7  -7  -6    2.24    1.11
   7  -7   6    0.00    1.01
   7  -7   6    1.50    0.75
  -7   7  -6   -0.33    1.05
   7   7   6    2.54    1.09
   8  -7   6    5.86    1.53
  -8  -7  -6    8.37    1.65
  -8   7  -6    6.64    1.58
   8   7   6    7.53    1.60
   8  -8  -6    2.11    1.36
   8  -8  -6    1.35    1.03
  -8   8   6   -0.79    1.20
   8   8  -6    1.15    1.26
   7  -8  -6   15.96    1.98
  -7  -8   6   14.99    1.95
   7  -8  -6   16.62    1.58
  -7  -8   6   13.89    1.05
   7   8  -6   15.31    1.75
  -7   8   6   16.12    1.69
  -6  -8   6   11.02    1.46
  -6  -8   6   11.83    0.97
   6  -8  -6   10.59    1.42
   6   8  -6   15.33    1.56
  -6   8   6   11.65    1.32
  -5  -8   6    8.66    1.26
   5  -8  -6   12.50    1.49
  -5  -8   6    8.47    0.90
  -5   8   6   11.39    1.28
   5   8  -6   11.43    1.20
  -5   8   6    7.74    1.01
   4  -8  -6   25.10    1.65
  -4  -8   6   23.46    1.33
   4   8  -6   25.55    1.69
   4   8  -6   23.15    1.38
  -4   8   6   24.64    1.41
  -4   8   6   24.26    1.52
   3  -8  -6    3.71    0.81
  -3  -8   6    3.05    0.61
  -3   8   6    4.56    0.64
   3   8  -6    2.09    0.65
   3   8  -6    4.18    0.57
  -3   8   6    3.39    0.68
   2  -8  -6    1.36    0.51
   2  -8  -6    1.70    0.48
  -2  -8   6    1.36    0.40
  -2   8   6    1.59    0.41
  -2   8   6    0.95    0.44
   2   8  -6    2.03    0.37
   2   8  -6    2.12    0.62
  -1  -8   6    0.01    0.22
  -1  -8   6    0.23    0.33
   1  -8  -6   -0.01    0.38
  -1  -8   6    0.37    0.19
   1  -8  -6    0.18    0.35
  -1   8   6    0.30    0.29
  -1   8   6    0.09    0.32
   1   8  -6    0.23    0.41
   0  -8  -6    0.46    0.38
   0  -8   6    0.29    0.47
   0  -8  -6    0.84    0.37
   0   8   6    0.39    0.32
   0   8   6   -0.17    0.39
   1  -8   6    1.39    0.20
   1  -8   6    1.64    0.48
   1  -8   6    1.62    0.21
  -1  -8  -6    0.81    0.42
   1   8   6    1.78    0.48
  -1   8  -6    1.51    0.50
   1   8   6    0.76    0.40
  -2  -8  -6    5.77    0.80
   2  -8   6    5.04    0.50
  -2  -8  -6    5.83    0.78
   2  -8   6    3.45    0.66
   2   8   6    6.23    0.80
  -2   8  -6    5.69    0.51
  -2   8  -6    4.54    0.78
   3  -8   6   20.45    1.32
   3  -8   6   15.26    0.99
  -3  -8  -6   18.35    1.29
  -3   8  -6   16.52    1.25
   3   8   6   17.29    1.27
  -3   8  -6   16.94    1.03
  -4  -8  -6    8.19    1.11
   4  -8   6    7.26    0.93
   4  -8   6    8.32    0.92
  -4  -8  -6    9.20    0.94
   4   8   6    7.24    1.08
  -4   8  -6    7.79    1.12
  -5  -8  -6    2.20    0.86
   5  -8   6    2.17    0.71
  -5  -8  -6    1.62    0.55
   5  -8   6    0.98    0.60
  -5   8  -6    0.78    0.77
   5   8   6    1.68    0.82
   6  -8   6    1.76    0.78
  -6  -8  -6   -0.92    0.81
   6  -8   6    1.02    0.72
  -6  -8  -6    0.15    0.45
  -6   8  -6   -1.62    0.73
   6   8   6    1.16    0.88
  -7  -8  -6    0.92    1.06
   7  -8   6    2.23    0.86
  -7   8  -6    2.13    1.21
   7   8   6    2.02    1.02
  -8  -8  -6    2.26    1.56
   8  -8   6    1.49    1.35
   8   8   6   -1.11    1.31
  -8   8  -6   -1.20    1.25
  -8  -9   6    0.87    1.38
   8  -9  -6    1.01    1.41
   8  -9  -6    2.80    1.23
  -8   9   6    2.11    1.41
   8   9  -6    4.04    1.55
   7  -9  -6    1.10    1.01
   7  -9  -6    0.16    0.93
  -7  -9   6    0.90    1.06
  -7   9   6    1.39    1.15
   7   9  -6   -0.46    0.98
  -6  -9   6    2.25    0.64
   6  -9  -6   -0.18    0.73
   6  -9  -6    1.46    1.00
  -6  -9   6    1.75    1.03
  -6   9   6    1.26    0.86
   6   9  -6    1.46    0.93
   5  -9  -6   18.43    1.67
  -5  -9   6   17.76    1.21
   5   9  -6   16.19    1.37
  -5   9   6   18.17    1.45
  -5   9   6   18.60    1.47
  -4  -9   6    7.52    0.94
   4  -9  -6   10.11    1.21
   4   9  -6    9.19    1.01
  -4   9   6    7.57    0.92
   4   9  -6    9.47    1.25
  -4   9   6    6.31    0.98
   3  -9  -6   20.30    1.39
  -3  -9   6   17.58    1.26
   3   9  -6   18.04    1.09
   3   9  -6   17.59    1.44
  -3   9   6   19.24    1.17
  -3   9   6   16.24    1.34
  -2  -9   6   -0.10    0.39
   2  -9  -6    0.24    0.44
  -2  -9   6    0.30    0.44
  -2  -9   6    0.09    0.30
  -2   9   6   -0.26    0.40
  -2   9   6    0.44    0.42
   2   9  -6   -0.16    0.40
   1  -9  -6    2.81    0.60
  -1  -9   6    3.82    0.72
  -1  -9   6    3.07    0.35
  -1  -9   6    3.25    0.33
  -1   9   6    2.45    0.60
   1   9  -6    2.45    0.69
  -1   9   6    2.50    0.53
   0  -9  -6    0.28    0.37
   0  -9   6    0.06    0.38
   0   9   6    0.18    0.37
   0   9   6    0.16    0.43
   0   9  -6    0.48    0.42
   1  -9   6   32.18    0.99
   1  -9   6   30.72    1.00
  -1  -9  -6   31.61    1.65
   1  -9   6   29.62    1.68
   1   9   6   31.99    1.56
  -1   9  -6   31.40    1.74
   1   9   6   32.93    1.73
  -2  -9  -6   17.75    1.31
   2  -9   6   18.89    0.88
  -2  -9  -6   18.94    1.30
   2  -9   6   19.58    1.35
  -2   9  -6   16.89    1.30
  -2   9  -6   18.44    0.86
   2   9   6   18.80    1.29
   3  -9   6    1.18    0.58
  -3  -9  -6    0.86    0.63
   3  -9   6    0.83    0.43
  -3  -9  -6    1.11    0.55
  -3   9  -6    1.02    0.53
  -3   9  -6    0.91    0.61
   4  -9   6    0.90    0.54
  -4  -9  -6    0.37    0.54
  -4  -9  -6    0.52    0.66
   4  -9   6    0.11    0.56
  -4   9  -6    0.19    0.60
   4   9   6    1.31    0.64
  -5  -9  -6    0.51    0.57
   5  -9   6   -0.77    0.62
  -5  -9  -6    0.47    0.84
   5  -9   6   -0.57    0.63
   5   9   6    1.11    0.82
   6  -9   6    3.17    0.95
  -6  -9  -6    2.36    1.14
  -6  -9  -6    2.98    0.68
   6  -9   6    4.11    1.04
   6   9   6    3.72    1.11
  -6   9  -6    3.24    1.09
  -7  -9  -6   -0.17    1.13
   7  -9   6    0.75    0.94
   7  -9   6   -0.78    1.05
   7   9   6    0.37    1.17
  -7   9  -6    1.48    1.22
   7 -10  -6    0.68    1.03
  -7 -10   6    2.99    1.26
   7 -10  -6   -0.50    1.26
  -7  10   6    1.02    1.12
   7  10  -6    1.57    1.16
  -6 -10   6    3.01    1.03
   6 -10  -6    1.71    0.92
   6 -10  -6    1.83    0.93
  -6 -10   6    1.57    0.77
  -6  10   6    2.33    0.98
   6  10  -6    1.95    1.00
   5 -10  -6    6.54    1.18
  -5 -10   6    6.07    0.92
   5 -10  -6    5.23    1.06
  -5 -10   6    6.57    1.29
  -5  10   6    6.33    0.98
   5  10  -6    5.76    0.95
  -4 -10   6    0.41    0.58
   4 -10  -6   -1.18    0.61
   4  10  -6   -0.07    0.55
  -4  10   6    1.34    0.67
  -4  10   6    0.24    0.62
   4  10  -6   -0.06    0.72
  -3 -10   6    5.43    0.87
   3 -10  -6    5.31    0.87
   3  10  -6    8.86    0.85
  -3  10   6    8.56    1.12
  -3  10   6    6.90    0.88
   3  10  -6    7.88    1.13
  -2 -10   6    2.38    0.66
  -2 -10   6    3.00    0.56
   2 -10  -6    1.11    0.56
  -2 -10   6    3.27    0.47
  -2  10   6    2.90    0.67
  -2  10   6    2.76    0.73
   2  10  -6    2.42    0.73
  -1 -10   6    0.30    0.24
  -1 -10   6    1.33    0.56
  -1 -10   6    0.13    0.28
  -1  10   6    0.68    0.46
  -1  10   6    0.55    0.51
   1  10  -6   -0.07    0.50
   0 -10   6   18.16    1.36
   0  10   6   19.81    1.21
   0  10   6   16.39    1.32
   0  10  -6   18.51    1.41
   1 -10   6   17.82    1.37
  -1 -10  -6   18.15    1.31
   1  10   6   19.78    1.31
  -1  10  -6   18.34    1.38
   1  10   6   20.40    1.38
   2 -10   6    9.75    0.68
  -2 -10  -6    9.86    1.15
  -2 -10  -6    9.64    1.12
  -2 -10  -6   11.22    1.24
   2 -10   6   10.14    1.20
  -2  10  -6   11.75    1.13
   3 -10   6   10.28    0.85
  -3 -10  -6    9.96    1.26
  -3 -10  -6   11.60    1.24
   3 -10   6    9.75    1.20
  -3 -10  -6   11.24    1.29
  -3  10  -6    7.23    1.18
  -3  10  -6    9.27    0.86
   4 -10   6    2.16    0.66
   4 -10   6    0.38    0.73
  -4 -10  -6    0.90    0.62
  -4 -10  -6    2.08    0.76
   4  10   6    1.97    0.82
  -4  10  -6    0.84    0.81
  -5 -10  -6    1.34    0.72
   5 -10   6   -0.43    0.75
   5 -10   6   -0.35    0.73
  -5 -10  -6    1.69    1.02
   5  10   6    0.74    0.96
  -5  10  -6    1.19    0.84
   6 -10   6    0.02    1.53
   6 -10   6    2.60    1.02
  -6 -10  -6   -1.53    1.10
   6  10   6    3.35    1.20
  -6  10  -6    3.18    1.12
  -7 -10  -6    2.64    1.50
   7 -10   6    2.73    1.26
   7 -10   6   -1.03    1.05
   7  10   6    1.07    1.34
  -7  10  -6    1.44    1.18
   7 -11  -6    0.61    1.25
   7 -11  -6   -0.71    1.38
  -7 -11   6   -0.16    1.29
  -7  11   6   -1.13    1.31
   7  11  -6    1.37    1.20
  -6 -11   6    0.74    0.83
   6 -11  -6    1.27    1.11
   6 -11  -6    1.88    1.16
  -6 -11   6    1.10    1.06
  -6  11   6    2.98    1.11
   6  11  -6    2.51    1.07
  -5 -11   6   23.18    2.12
  -5 -11   6   23.90    1.61
   5 -11  -6   27.42    2.09
   5 -11  -6   27.14    2.09
  -5  11   6   25.63    1.82
   5  11  -6   23.29    1.73
   4 -11  -6   11.65    1.51
  -4 -11   6   10.09    1.25
   4 -11  -6   10.72    1.37
   4  11  -6    8.25    0.99
  -4  11   6   10.25    1.19
   4  11  -6    9.97    1.50
   3 -11  -6    8.62    1.14
  -3 -11   6   10.06    0.96
  -3 -11   6   10.78    1.19
  -3  11   6    8.63    1.00
   3  11  -6   10.28    1.33
  -2 -11   6   10.24    1.00
  -2 -11   6   10.64    0.78
   2 -11  -6   10.30    1.23
  -2 -11   6    9.53    1.14
  -2  11   6    8.84    1.17
  -2  11   6   12.34    1.08
   2  11  -6   11.62    1.45
  -1 -11   6   15.51    0.68
  -1 -11   6   13.57    0.73
  -1 -11   6   15.56    1.35
   1 -11  -6   13.33    1.18
   1  11  -6   17.58    1.51
  -1  11   6   13.42    1.29
  -1  11   6   14.36    1.12
   0 -11  -6   11.68    1.14
   0 -11   6   14.66    1.31
   0  11  -6   15.84    1.46
   1 -11   6    1.82    0.68
  -1 -11  -6    2.06    0.69
  -1 -11  -6    0.73    0.70
  -1  11  -6    0.66    0.67
   1  11   6    0.56    0.56
  -2 -11  -6    1.41    0.68
   2 -11   6    1.07    0.36
   2 -11   6    1.70    0.65
  -2 -11  -6    0.22    0.70
   2 -11   6    0.96    0.38
  -2  11  -6    1.39    0.70
  -3 -11  -6   19.30    1.51
   3 -11   6   17.12    1.08
  -3 -11  -6   18.47    1.55
   3 -11   6   18.12    1.53
  -3 -11  -6   14.54    1.55
  -3  11  -6   14.17    1.25
  -3  11  -6   18.48    1.59
   4 -11   6    1.69    0.88
  -4 -11  -6    0.99    0.91
  -4 -11  -6    1.00    0.86
   4 -11   6    2.43    0.72
  -4 -11  -6    0.02    0.71
  -4  11  -6    2.36    0.92
  -5 -11  -6    1.03    1.05
  -5 -11  -6    0.01    0.81
   5 -11   6   -0.05    0.84
   5 -11   6   -0.67    0.86
   5  11   6    1.04    0.99
  -5  11  -6   -0.36    0.92
   6 -11   6    3.06    1.12
   6 -11   6    1.77    1.17
  -6 -11  -6    4.55    1.51
   6  11   6    6.18    1.40
  -6  11  -6    4.47    1.30
  -6 -12   6    2.25    2.26
   6 -12  -6   -0.38    1.33
  -6 -12   6   -0.46    0.95
   6 -12  -6    0.86    1.17
  -6  12   6   -0.25    1.10
   6  12  -6   -0.94    1.14
  -5 -12   6    0.48    1.14
   5 -12  -6   -0.17    1.00
  -5 -12   6    0.24    0.83
  -5  12   6    1.64    0.98
   5  12  -6   -0.60    0.87
  -4 -12   6    0.47    0.76
   4 -12  -6   -0.58    0.78
  -4 -12   6   -0.40    0.76
   4 -12  -6    0.93    0.90
  -4  12   6    0.57    0.84
   4  12  -6   -0.22    0.86
   3 -12  -6    8.56    1.20
   3 -12  -6    8.42    1.29
  -3 -12   6    7.70    0.87
  -3 -12   6    7.72    1.18
  -3  12   6    8.42    1.10
   3  12  -6    7.86    1.34
   2 -12  -6   -1.07    0.64
  -2 -12   6    0.53    0.61
   2 -12  -6    0.00    0.67
  -2 -12   6   -0.70    0.41
  -2  12   6   -0.27    0.63
   1 -12  -6    5.12    1.03
  -1 -12   6    3.41    1.01
   1 -12  -6    3.42    0.82
   1  12  -6    4.72    0.93
  -1  12   6    4.29    0.86
   0 -12  -6    0.42    0.65
   0 -12  -6    0.51    0.78
   0  12  -6    0.97    0.77
   0  12   6    0.47    0.64
   1 -12   6    4.99    1.02
  -1 -12  -6    4.66    1.10
  -1 -12  -6    4.15    0.85
  -1  12  -6    3.59    1.02
   1  12   6    3.23    0.86
  -2 -12  -6    4.39    0.99
  -2 -12  -6    5.18    1.06
   2 -12   6    3.96    0.95
   2 -12   6    3.98    0.39
  -2  12  -6    4.92    1.01
  -3 -12  -6    0.94    0.83
   3 -12   6    1.69    0.95
  -3 -12  -6    2.28    0.96
   3 -12   6    1.94    0.55
  -3 -12  -6    0.00    0.82
  -3  12  -6    1.00    0.78
  -4 -12  -6   -0.60    0.83
   4 -12   6    2.06    0.98
  -4 -12  -6   -0.35    0.96
   4 -12   6   -0.53    0.71
  -4 -12  -6    0.67    0.95
  -4  12  -6    0.45    0.98
  -5 -12  -6   -0.07    0.98
  -5 -12  -6   -1.30    1.17
   5 -12   6   -0.28    1.05
  -5 -12  -6    1.56    1.04
  -5  12  -6    2.36    1.22
  -6 -12  -6    1.36    1.48
   6 -12   6    1.49    1.20
  -6  12  -6   -0.63    2.06
   6 -13  -6    0.47    1.49
  -6 -13   6   -1.18    1.15
  -6 -13   6   -0.79    1.35
  -6  13   6    2.64    1.43
   6  13  -6    1.85    1.96
  -5 -13   6    1.84    1.06
   5 -13  -6    0.12    1.17
  -5 -13   6   -0.86    1.17
  -5 -13   6    4.75    1.12
   5 -13  -6   -0.62    1.23
  -5  13   6    1.38    1.25
   4 -13  -6   -0.25    0.90
  -4 -13   6    0.11    0.85
   4 -13  -6    1.57    1.09
  -4 -13   6    0.09    0.87
  -4  13   6   -0.01    0.91
   4  13  -6    0.00    1.07
   3 -13  -6    0.57    0.88
  -3 -13   6    0.63    0.66
   3 -13  -6   -0.94    0.88
  -3 -13   6    1.70    0.89
   3  13  -6    0.66    1.05
  -3  13   6   -0.96    0.84
   2 -13  -6    5.06    1.10
   2 -13  -6    6.46    1.09
  -2 -13   6    8.23    1.28
  -2  13   6    5.32    1.02
   2  13  -6    9.16    1.39
  -1 -13   6    1.71    0.85
   1 -13  -6    2.71    0.89
   1 -13  -6    1.42    0.88
  -1  13   6    0.60    0.77
   1  13  -6    1.40    0.87
   0 -13  -6   21.00    1.65
   0 -13  -6   20.27    1.81
   0 -13   6   20.38    1.77
   0  13   6   19.27    1.60
   0  13  -6   20.29    1.85
  -1 -13  -6   -0.50    0.74
   1 -13   6    0.35    0.76
  -1 -13  -6    0.74    0.80
   1  13   6    0.69    0.78
  -1  13  -6    0.80    0.80
  -2 -13  -6   10.42    1.45
  -2 -13  -6    8.38    1.32
   2 -13   6   10.27    1.40
  -2 -13  -6    9.90    1.31
  -2  13  -6    8.08    1.33
   3 -13   6    9.59    1.43
  -3 -13  -6    9.32    1.45
  -3 -13  -6   10.51    1.48
  -3 -13  -6    8.86    1.38
  -3  13  -6    6.92    1.40
  -4 -13  -6    2.27    1.08
  -4 -13  -6    3.47    1.28
   4 -13   6    3.47    1.21
  -4 -13  -6    2.05    1.08
  -4  13  -6    2.18    1.10
  -5 -13  -6    0.90    1.24
  -5 -13  -6    2.72    1.35
  -5 -13  -6    2.71    1.15
   5 -13   6    2.95    1.12
  -5  13  -6    1.62    1.26
  -5 -14   6   -0.24    1.39
  -5 -14   6   -1.94    1.10
   5 -14  -6   -0.32    1.40
   5 -14  -6   -1.14    1.44
  -5  14   6    0.05    1.31
   4 -14  -6    1.76    1.36
  -4 -14   6    3.66    1.15
  -4  14   6    3.04    1.30
   4  14  -6    2.37    1.36
   3 -14  -6    0.30    1.18
   3 -14  -6    1.20    1.11
  -3 -14   6    0.80    1.01
  -3  14   6    2.17    1.08
   3  14  -6    2.91    1.30
  -2 -14   6    0.34    0.98
   2 -14  -6    3.11    0.99
   2 -14  -6    0.56    1.07
   2  14  -6    0.26    0.97
  -2  14   6    1.24    0.96
   1 -14  -6   -0.19    0.86
   1 -14  -6    1.17    1.10
  -1 -14   6    0.21    0.84
   1  14  -6    0.62    1.03
  -1  14   6   -0.55    0.90
   0 -14  -6    3.84    1.15
   0 -14   6    2.77    1.04
   0 -14  -6    4.94    1.03
   0  14   6    2.50    1.03
   0  14  -6    2.90    1.04
  -1 -14  -6    3.59    1.20
   1 -14   6    1.43    0.93
  -1 -14  -6    2.48    0.99
  -1  14  -6    1.32    0.95
   1  14   6    1.98    1.07
  -2 -14  -6    0.88    1.10
   2 -14   6    0.64    0.93
  -2 -14  -6    0.93    0.98
  -2 -14  -6   -0.26    0.96
  -2  14  -6    1.75    1.06
  -3 -14  -6    2.39    1.27
  -3 -14  -6    1.24    1.09
   3 -14   6    0.40    1.16
  -3 -14  -6    0.00    1.02
  -3  14  -6   -0.32    1.04
   4 -14   6    1.06    2.06
  -4 -14  -6    1.21    1.25
  -4 -14  -6    0.39    1.21
  -4 -14  -6    0.58    1.24
  -4  14  -6    0.61    1.22
   3 -15  -6   -1.15    1.13
  -3 -15   6    0.58    1.19
   2 -15  -6   -1.43    1.02
  -2 -15   6   -0.64    0.95
   2 -15  -6   -1.17    1.13
  -2  15   6    0.44    1.19
   2  15  -6   -1.25    1.29
   1 -15  -6    2.20    1.19
  -1 -15   6    2.50    1.25
   1 -15  -6    3.70    1.47
   1  15  -6    5.10    1.50
  -1  15   6    5.08    1.20
   0 -15   6    4.68    1.38
   0 -15  -6    1.98    1.17
   0 -15  -6    3.23    1.18
   0  15   6    1.96    1.13
   0  15  -6    3.57    1.17
  -1 -15  -6   -0.80    1.11
  -1 -15  -6   -1.06    0.99
   1  15   6    0.86    1.14
  -1  15  -6    1.14    1.10
   2 -15   6    4.06    1.31
  -2 -15  -6    2.69    1.26
  -2 -15  -6    4.43    1.41
  -2 -15  -6    2.41    1.20
  -2  15  -6    5.37    1.46
  -3 -15  -6    1.28    1.14
   3 -15   6    0.28    1.12
  -3 -15  -6    0.32    1.40
  -3 -15  -6    1.74    1.40
  -3  15  -6    2.07    1.57
   1 -16  -6    0.97    1.47
  -1 -16   6    0.29    1.17
   1  16  -6    1.42    1.33
  -1  16   6    2.66    1.48
   0 -16  -6    0.56    1.26
   0 -16   6   -1.02    1.09
   0  16  -6   -0.62    1.59
   0  16   6    1.70    1.42
 -10   0   7   -0.26    1.52
  10   0  -7   -1.74    1.44
  -9   0   7    0.32    1.14
   9   0  -7    1.26    1.07
  -8   0   7   -0.06    0.77
   8   0  -7   -0.07    0.80
  -7   0   7   29.11    1.09
   7   0  -7   28.18    1.07
   7   0  -7   31.20    2.08
  -7   0   7   32.42    2.02
   6   0  -7   -0.24    0.53
  -6   0   7   -0.06    0.46
   6   0  -7   -0.17    0.29
  -6   0   7   -0.26    0.26
   5   0  -7    1.06    0.47
   5   0  -7    1.54    0.31
  -5   0   7    1.27    0.30
  -5   0   7    1.25    0.46
   4   0  -7    0.00    0.28
  -4   0   7   -0.15    0.27
  -4   0   7    0.12    0.19
   4   0  -7   -0.29    0.19
  -3   0   7   20.29    0.87
   3   0  -7   19.12    1.08
   3   0  -7   20.49    0.85
  -3   0   7   19.91    1.08
  -3   0   7   19.59    0.98
   2   0  -7   -0.08    0.15
  -2   0   7    0.24    0.18
  -2   0   7    0.10    0.14
  -2   0   7    0.20    0.13
  -2   0   7   -0.25    0.12
   2   0  -7    0.19    0.14
   1   0  -7   12.46    0.58
  -1   0   7   11.88    0.58
   1   0  -7   11.58    0.59
  -1   0   7   11.70    0.59
  -1   0   7   12.04    0.50
   1   0  -7   10.69    0.48
   0   0   7    0.04    0.11
   0   0   7    0.11    0.13
   0   0  -7   -0.10    0.10
   0   0  -7    0.03    0.09
   0   0   7    0.20    0.14
   0   0  -7    0.08    0.10
  -1   0  -7   20.80    0.79
   1   0   7   21.32    0.90
  -1   0  -7   21.19    0.87
   1   0   7   21.10    0.81
  -1   0  -7   19.30    0.87
   1   0   7   20.57    0.85
   2   0   7    0.17    0.14
   2   0   7   -0.10    0.17
  -2   0  -7    0.02    0.17
   2   0   7   -0.27    0.22
  -2   0  -7   -0.23    0.12
  -2   0  -7    0.15    0.23
  -3   0  -7   10.11    0.51
   3   0   7   11.60    0.80
  -3   0  -7   11.42    0.81
   3   0   7   10.98    0.53
   4   0   7    0.05    0.31
   4   0   7   -0.24    0.13
  -4   0  -7    0.41    0.37
  -4   0  -7   -0.09    0.16
  -5   0  -7  168.05    5.55
   5   0   7  172.26    5.58
   6   0   7    0.41    0.55
  -6   0  -7   -0.56    0.51
   7   0   7    0.84    0.79
  -7   0  -7    2.46    1.05
   8   0   7   -0.38    0.91
  -8   0  -7   -0.69    0.83
  -9   0  -7   16.11    2.11
  10  -1  -7    3.00    1.68
 -10  -1   7   -0.58    1.55
  10   1  -7    0.31    1.52
 -10   1   7    1.47    1.51
   9  -1  -7    2.16    1.26
  -9  -1   7    1.37    1.11
  -9   1   7    1.23    1.17
   9   1  -7    3.77    1.31
   8  -1  -7    0.14    0.84
  -8  -1   7   -1.27    0.70
   8   1  -7   -1.28    0.86
   7  -1  -7    0.74    0.38
  -7  -1   7    0.83    0.25
  -7  -1   7    0.57    0.66
   7  -1  -7    0.81    0.67
  -7   1   7    0.60    0.70
   7   1  -7    0.66    0.27
   7   1  -7    0.39    0.62
  -7   1   7    0.65    0.35
   6  -1  -7   27.68    1.78
  -6  -1   7   26.33    1.71
  -6  -1   7   25.07    1.32
  -6   1   7   25.20    1.11
   6   1  -7   23.58    1.00
   6   1  -7   25.93    1.75
  -6   1   7   24.54    1.57
  -5  -1   7    2.02    0.34
  -5  -1   7    1.50    0.52
   5  -1  -7    2.40    0.63
   5   1  -7    2.41    0.35
  -5   1   7    3.02    0.44
  -5   1   7    2.04    0.52
   5   1  -7    2.24    0.78
   4  -1  -7   12.22    0.98
   4  -1  -7   12.42    0.69
   4  -1  -7   12.44    0.97
  -4  -1   7   11.38    0.87
  -4  -1   7   13.71    0.67
   4   1  -7   11.24    0.61
  -4   1   7   13.14    0.88
   4   1  -7   11.81    0.94
  -4   1   7   11.45    0.68
  -3  -1   7    7.18    0.66
   3  -1  -7    7.77    0.68
  -3  -1   7    6.84    0.60
   3  -1  -7    7.06    0.50
  -3  -1   7    7.65    0.62
  -3  -1   7    7.82    0.51
   3  -1  -7    6.77    0.54
  -3   1   7    6.89    0.65
   3   1  -7    6.12    0.44
  -3   1   7    7.13    0.55
  -3   1   7    7.54    0.51
   3   1  -7    5.89    0.59
  -2  -1   7   25.28    1.06
   2  -1  -7   24.58    0.99
  -2  -1   7   25.03    1.02
   2  -1  -7   24.46    1.12
  -2   1   7   24.06    1.21
   2   1  -7   25.12    1.09
   2   1  -7   25.95    0.96
  -2   1   7   25.70    1.01
  -2   1   7   26.55    0.95
  -2   1   7   25.65    0.93
   1  -1  -7   27.84    1.07
   1  -1  -7   27.72    1.13
  -1  -1   7   30.38    1.08
  -1  -1   7   29.88    1.05
  -1  -1   7   30.04    1.06
   1  -1  -7   30.90    0.90
   1   1  -7   31.05    1.07
   1   1  -7   28.82    1.05
   1   1  -7   29.74    1.06
  -1   1   7   30.01    1.14
  -1   1   7   29.99    1.11
  -1   1   7   29.97    0.88
   0  -1  -7    0.45    0.16
   0  -1  -7    0.57    0.11
   0  -1   7    0.37    0.16
   0  -1  -7    0.23    0.13
   0  -1   7    0.36    0.13
   0   1  -7    0.46    0.14
   0   1   7    0.38    0.14
   0   1   7    0.32    0.16
   0   1  -7    0.38    0.14
   0   1  -7    0.45    0.15
   0   1  -7    0.35    0.12
   0   1   7    0.67    0.12
  -1  -1  -7    7.06    0.42
   1  -1   7    6.79    0.48
  -1  -1  -7    7.35    0.45
   1  -1   7    6.96    0.41
  -1  -1  -7    7.47    0.50
   1  -1   7    7.19    0.44
  -1   1  -7    6.87    0.44
   1   1   7    7.02    0.45
   1   1   7    6.63    0.41
  -1   1  -7    6.63    0.41
   1   1   7    7.27    0.50
  -2  -1  -7  114.28    3.60
   2  -1   7  116.32    3.50
  -2  -1  -7  116.10    3.24
   2  -1   7  116.69    3.29
  -2  -1  -7  115.95    3.53
   2  -1   7  115.00    3.56
   2   1   7  119.03    3.27
   2   1   7  117.20    3.70
  -2   1  -7  118.44    3.31
  -2   1  -7  114.37    3.51
   2   1   7  121.88    3.62
  -2   1  -7  115.33    3.59
  -3  -1  -7    2.73    0.51
   3  -1   7    3.10    0.32
  -3  -1  -7    3.82    0.30
   3  -1   7    2.89    0.48
  -3   1  -7    3.61    0.37
  -3   1  -7    3.89    0.56
   3   1   7    3.79    0.30
  -3   1  -7    2.97    0.50
   3   1   7    3.42    0.53
   4  -1   7   16.65    0.69
   4  -1   7   14.64    1.05
  -4  -1  -7   16.21    1.12
  -4  -1  -7   16.96    0.61
   4   1   7   17.11    1.15
   4   1   7   16.98    0.61
  -4   1  -7   17.47    1.20
  -4   1  -7   16.08    0.74
   5  -1   7   28.95    0.97
  -5  -1  -7   28.70    1.69
   5  -1   7   28.55    1.00
   5  -1   7   30.15    1.68
   5   1   7   27.93    1.70
  -5   1  -7   29.17    1.72
  -6  -1  -7    1.22    0.69
   6  -1   7    1.22    0.68
   6   1   7    0.90    0.58
  -6   1  -7    1.83    0.67
  -7  -1  -7    1.98    0.90
   7  -1   7    2.46    0.83
  -7   1  -7    2.19    0.87
  -8  -1  -7    0.26    0.91
   8  -1   7    1.81    1.06
  -8   1  -7    2.29    1.04
   8   1   7    0.09    1.00
  -9  -1  -7   -0.30    1.27
  -9   1  -7    1.83    1.35
   9   1   7    2.17    1.20
  -9  -2   7    0.96    1.08
   9  -2  -7   -0.31    1.07
  -9   2   7    0.87    1.09
   9   2  -7    1.02    1.06
   8  -2  -7    1.84    0.99
  -8  -2   7    0.80    0.90
   8   2  -7    4.11    1.15
   7  -2  -7    0.94    0.70
  -7  -2   7    0.84    0.76
   7  -2  -7    1.00    0.47
  -7   2   7    1.20    0.75
   7   2  -7    1.03    0.77
  -7   2   7    0.42    0.41
   6  -2  -7    2.55    0.52
  -6  -2   7    1.86    0.69
   6  -2  -7    1.87    0.75
  -6  -2   7    2.23    0.34
   6   2  -7    2.08    0.39
  -6   2   7    2.43    0.47
   6   2  -7    1.55    0.67
  -6   2   7    1.38    0.59
  -5  -2   7    4.63    0.43
   5  -2  -7    4.63    0.54
   5  -2  -7    3.24    0.71
  -5   2   7    3.97    0.66
   5   2  -7    3.94    0.44
  -5   2   7    4.10    0.49
   4  -2  -7   37.32    1.80
   4  -2  -7   36.81    1.54
  -4  -2   7   36.13    1.32
   4  -2  -7   34.55    1.38
  -4  -2   7   36.11    1.70
   4   2  -7   36.41    1.31
  -4   2   7   38.72    1.58
  -4   2   7   37.18    1.44
   4   2  -7   34.69    1.69
  -3  -2   7    1.25    0.27
  -3  -2   7    1.15    0.32
   3  -2  -7    0.62    0.26
  -3  -2   7    1.04    0.35
  -3  -2   7    0.97    0.34
   3  -2  -7    0.87    0.29
   3  -2  -7    1.10    0.38
  -3   2   7    0.85    0.26
   3   2  -7    1.05    0.37
  -3   2   7    0.72    0.26
   3   2  -7    0.81    0.24
  -2  -2   7   40.88    1.41
   2  -2  -7   41.40    1.46
   2  -2  -7   40.79    1.31
   2  -2  -7   36.74    1.57
  -2  -2   7   40.42    1.47
  -2  -2   7   42.50    1.54
  -2   2   7   41.47    1.58
  -2   2   7   42.53    1.32
   2   2  -7   41.21    1.52
  -2   2   7   40.16    1.47
   2   2  -7   40.21    1.41
   2   2  -7   43.66    1.56
   1  -2  -7   11.25    0.60
  -1  -2   7   11.85    0.52
  -1  -2   7   10.87    0.61
   1  -2  -7   11.48    0.65
  -1  -2   7   11.41    0.58
   1   2  -7   11.36    0.60
  -1   2   7   10.62    0.63
   1   2  -7   11.07    0.52
  -1   2   7   10.94    0.61
   0  -2  -7   14.17    0.66
   0  -2  -7   13.71    0.47
   0  -2   7   14.11    0.67
   0  -2   7   15.21    0.71
   0  -2  -7   13.28    0.70
   0   2  -7   14.60    0.53
   0   2  -7   13.42    0.52
   0   2   7   14.58    0.73
   0   2  -7   12.24    0.64
   0   2  -7   13.88    0.76
   0   2   7   13.94    0.48
  -1  -2  -7   -0.04    0.19
  -1  -2  -7    0.05    0.13
  -1  -2  -7    0.02    0.14
   1  -2   7    0.66    0.26
   1  -2   7    0.25    0.14
   1  -2   7    0.12    0.12
  -1   2  -7    0.06    0.12
  -1   2  -7    0.16    0.15
   1   2   7    0.46    0.18
   1   2   7    0.01    0.14
  -1   2  -7    0.13    0.16
   1   2   7    0.30    0.18
   2  -2   7    2.14    0.35
   2  -2   7    1.98    0.41
   2  -2   7    1.76    0.28
  -2  -2  -7    1.93    0.27
  -2  -2  -7    1.34    0.30
  -2  -2  -7    3.07    0.47
   2   2   7    1.99    0.39
  -2   2  -7    2.15    0.44
  -2   2  -7    2.23    0.34
  -2   2  -7    1.79    0.33
   2   2   7    1.69    0.39
   2   2   7    2.40    0.30
   3  -2   7    7.99    0.67
  -3  -2  -7    8.26    0.69
   3  -2   7    7.52    0.49
  -3  -2  -7    7.26    0.42
  -3   2  -7    6.44    0.76
   3   2   7    7.68    0.44
   3   2   7    7.51    0.70
  -3   2  -7    6.51    0.52
  -3   2  -7    5.29    0.65
   4  -2   7   43.87    1.52
  -4  -2  -7   45.90    1.35
  -4  -2  -7   46.31    2.05
   4  -2   7   47.14    2.00
   4   2   7   45.07    1.38
   4   2   7   48.27    2.11
  -4   2  -7   47.29    2.09
   5  -2   7    6.57    0.56
   5  -2   7    5.87    0.51
   5  -2   7    7.98    0.96
  -5  -2  -7    6.96    0.94
  -5   2  -7    5.83    0.89
   5   2   7    6.80    0.95
   6  -2   7    6.67    0.46
   6  -2   7    5.46    0.98
  -6  -2  -7    5.05    1.04
   6  -2   7    6.33    0.49
   6   2   7    8.23    1.18
  -6   2  -7    6.67    1.15
  -7  -2  -7    0.58    0.81
   7  -2   7   -0.30    0.79
  -7   2  -7   -0.51    0.75
   7   2   7   -0.58    0.66
  -8  -2  -7    4.34    1.17
   8  -2   7    3.09    1.17
   8   2   7    4.34    1.23
  -8   2  -7    5.15    1.34
   9  -2   7    0.43    1.89
  -9  -2  -7    1.31    1.28
  -9   2  -7    2.07    1.27
   9   2   7    2.25    1.33
   9  -3  -7   -1.73    1.21
  -9  -3   7   -0.21    1.06
  -9   3   7    0.18    1.05
   9   3  -7    1.60    1.23
  -8  -3   7   -0.85    0.91
   8  -3  -7    1.51    0.96
   8  -3  -7    1.73    0.60
   8   3  -7   -0.29    0.95
   7  -3  -7    1.24    0.76
  -7  -3   7   -0.11    0.68
   7   3  -7    0.34    0.64
  -7   3   7    0.11    0.72
  -7   3   7    0.75    0.48
  -6  -3   7   21.93    1.64
  -6  -3   7   21.13    1.28
   6  -3  -7   20.20    1.60
   6   3  -7   20.45    1.52
   6   3  -7   20.26    0.94
  -6   3   7   22.08    1.42
  -6   3   7   20.87    1.16
  -5  -3   7    4.20    0.73
   5  -3  -7    3.98    0.79
  -5  -3   7    4.19    0.46
  -5   3   7    4.27    0.55
  -5   3   7    4.13    0.65
   5   3  -7    4.91    0.53
   4  -3  -7   37.62    1.58
  -4  -3   7   35.77    1.34
  -4  -3   7   40.52    1.80
   4  -3  -7   35.21    1.78
   4  -3  -7   35.24    1.44
   4   3  -7   37.13    1.50
  -4   3   7   35.56    1.50
   4   3  -7   35.20    1.70
  -4   3   7   34.81    1.53
   3  -3  -7    7.88    0.71
  -3  -3   7    7.61    0.51
   3  -3  -7    8.62    0.59
   3  -3  -7    8.34    0.63
  -3  -3   7    7.42    0.68
   3   3  -7    7.29    0.66
  -3   3   7    7.83    0.61
   3   3  -7    8.25    0.68
  -3   3   7    7.91    0.58
   2  -3  -7   12.80    0.58
  -2  -3   7   12.13    0.76
   2  -3  -7   13.93    0.76
  -2  -3   7   12.63    0.67
   2  -3  -7   13.18    0.82
  -2  -3   7   13.02    0.70
   2   3  -7   12.86    0.79
  -2   3   7   14.34    0.78
   2   3  -7   14.44    0.73
  -2   3   7   13.16    0.81
   2   3  -7   12.91    0.76
  -2   3   7   12.94    0.59
   1  -3  -7    3.77    0.43
   1  -3  -7    4.38    0.20
  -1  -3   7    4.25    0.29
   1  -3  -7    5.24    0.46
  -1  -3   7    4.15    0.37
   1   3  -7    5.32    0.49
  -1   3   7    4.59    0.42
  -1   3   7    3.75    0.52
   1   3  -7    4.74    0.31
  -1   3   7    4.69    0.20
   1   3  -7    4.26    0.41
   0  -3  -7   77.76    2.12
   0  -3   7   80.82    2.49
   0  -3  -7   75.21    2.47
   0  -3   7   76.42    2.41
   0  -3  -7   75.81    2.11
   0  -3  -7   74.39    2.38
   0   3  -7   78.67    2.47
   0   3  -7   75.50    2.04
   0   3   7   75.56    2.42
   0   3   7   76.57    2.64
  -1  -3  -7   22.82    0.91
   1  -3   7   22.18    0.96
  -1  -3  -7   21.29    1.05
   1  -3   7   21.22    0.78
   1  -3   7   20.05    1.03
  -1  -3  -7   22.78    0.94
   1   3   7   21.68    1.05
   1   3   7   22.81    0.95
  -1   3  -7   21.94    1.04
  -1   3  -7   21.00    0.80
  -1   3  -7   23.41    1.13
  -2  -3  -7   14.57    0.69
  -2  -3  -7   15.64    0.85
   2  -3   7   13.81    0.75
   2   3   7   14.00    0.89
   2   3   7   14.38    0.82
  -2   3  -7   14.29    0.90
  -2   3  -7   15.29    0.79
  -2   3  -7   15.00    0.80
   3  -3   7    0.47    0.31
   3  -3   7    0.73    0.26
  -3  -3  -7    0.45    0.29
  -3  -3  -7    0.96    0.23
   3   3   7    0.47    0.20
  -3   3  -7    1.29    0.42
  -3   3  -7    0.58    0.31
   3   3   7    0.53    0.33
  -3   3  -7    0.49    0.34
   4  -3   7   27.33    1.22
   4  -3   7   26.87    1.43
  -4  -3  -7   27.07    0.95
   4  -3   7   28.52    1.16
  -4  -3  -7   28.68    1.55
   4   3   7   27.50    0.99
   4   3   7   29.89    1.88
  -4   3  -7   28.09    1.82
   5  -3   7   12.37    0.82
   5  -3   7   11.03    0.68
   5  -3   7   12.39    1.09
  -5  -3  -7   11.19    1.07
  -5   3  -7    9.51    1.12
   5   3   7   11.32    1.26
   6  -3   7    1.07    0.43
   6  -3   7    0.64    0.33
  -6  -3  -7    0.56    0.59
   6  -3   7    0.85    0.67
   6   3   7    0.56    0.64
  -6   3  -7   -0.16    0.55
   7  -3   7    0.13    0.27
   7  -3   7    0.57    0.76
   7  -3   7    0.26    0.32
  -7  -3  -7   -0.55    0.78
  -7   3  -7   -0.41    0.72
   7   3   7   -0.57    0.68
   8  -3   7    2.37    1.07
  -8  -3  -7    3.82    1.12
   8   3   7    1.16    1.10
  -8   3  -7    2.05    1.08
  -9  -3  -7    0.47    1.20
   9   3   7   -0.27    1.30
  -9   3  -7    1.24    1.21
   9  -4  -7    1.52    1.33
  -9  -4   7    3.69    1.47
   9   4  -7    0.68    1.33
  -9   4   7    2.25    1.34
  -8  -4   7    0.68    1.05
   8  -4  -7    0.34    0.64
   8  -4  -7    0.72    0.94
   8   4  -7   -1.14    0.91
   7  -4  -7    0.64    0.85
  -7  -4   7   -0.62    0.79
  -7  -4   7    0.84    0.34
  -7  -4   7    0.70    0.28
  -7   4   7    1.28    0.56
   7   4  -7    0.02    0.63
  -7   4   7   -0.58    0.71
   6  -4  -7    0.13    0.56
  -6  -4   7   -0.13    0.29
  -6  -4   7    0.06    0.61
  -6   4   7    0.43    0.52
   6   4  -7   -0.51    0.41
  -6   4   7    0.73    0.46
   6   4  -7   -0.24    0.62
  -5  -4   7    8.42    1.07
   5  -4  -7   10.36    1.21
  -5  -4   7    8.61    0.63
  -5   4   7    8.68    0.77
   5   4  -7    8.69    0.73
  -5   4   7    9.22    0.89
   5   4  -7   10.12    1.25
  -4  -4   7   32.63    1.68
   4  -4  -7   31.71    1.46
  -4  -4   7   32.52    1.28
   4  -4  -7   31.16    1.69
   4   4  -7   31.60    1.33
  -4   4   7   32.36    1.46
   4   4  -7   32.96    1.60
  -4   4   7   34.08    1.47
  -3  -4   7   38.97    1.45
   3  -4  -7   40.40    1.79
  -3  -4   7   39.45    1.59
   3  -4  -7   35.65    1.41
   3   4  -7   36.98    1.48
  -3   4   7   38.89    1.60
   3   4  -7   39.90    1.59
  -3   4   7   36.48    1.44
   3   4  -7   38.96    1.74
   2  -4  -7   31.38    1.37
   2  -4  -7   33.21    1.48
  -2  -4   7   34.82    1.34
   2  -4  -7   32.97    1.15
  -2  -4   7   33.40    1.25
  -2   4   7   32.43    1.46
   2   4  -7   32.72    1.46
  -2   4   7   35.80    1.45
   2   4  -7   32.64    1.25
   2   4  -7   34.11    1.37
  -2   4   7   35.22    1.16
   1  -4  -7  115.71    3.49
   1  -4  -7  109.79    3.03
  -1  -4   7  107.64    3.37
  -1  -4   7  113.89    3.47
   1  -4  -7  111.41    3.42
  -1  -4   7  114.46    3.04
  -1   4   7  110.41    3.45
   1   4  -7  107.32    3.40
  -1   4   7  114.67    3.48
   1   4  -7  111.95    3.04
  -1   4   7  113.52    3.03
   0  -4  -7    3.74    0.49
   0  -4   7    3.21    0.46
   0  -4   7    3.39    0.42
   0  -4  -7    3.57    0.51
   0  -4  -7    3.97    0.50
   0  -4  -7    3.42    0.28
   0   4  -7    2.74    0.44
   0   4   7    3.76    0.47
   0   4  -7    3.54    0.47
   1  -4   7    7.77    0.67
  -1  -4  -7    7.14    0.61
   1  -4   7    8.40    0.39
  -1  -4  -7    8.95    0.54
  -1  -4  -7    7.91    0.59
   1  -4   7    9.10    0.62
  -1  -4  -7    8.33    0.53
  -1  -4  -7    7.53    0.66
   1   4   7    8.75    0.60
  -1   4  -7    9.22    0.68
  -1   4  -7    8.04    0.40
  -1   4  -7    8.73    0.63
   2  -4   7   12.65    0.70
  -2  -4  -7   14.57    0.86
  -2  -4  -7   13.34    0.83
  -2  -4  -7   13.89    0.82
   2  -4   7   13.76    0.80
  -2   4  -7   13.80    0.94
   2   4   7   15.06    0.93
   2   4   7   14.21    0.75
  -2   4  -7   13.55    0.73
  -2   4  -7   13.35    0.83
  -3  -4  -7    5.12    0.46
  -3  -4  -7    5.79    0.70
   3  -4   7    6.04    0.67
   3  -4   7    5.24    0.58
   3   4   7    5.56    0.47
  -3   4  -7    3.96    0.54
   3   4   7    4.92    0.68
  -3   4  -7    5.61    0.73
  -3   4  -7    6.05    0.69
   4  -4   7   -0.01    0.26
  -4  -4  -7   -0.07    0.22
   4  -4   7    0.21    0.33
  -4  -4  -7    0.06    0.37
   4   4   7    0.05    0.21
  -4   4  -7    0.32    0.39
   4   4   7    0.05    0.36
   5  -4   7    8.88    1.05
  -5  -4  -7   10.74    0.46
  -5  -4  -7    9.49    1.14
  -5  -4  -7    9.79    0.44
   5  -4   7   11.49    0.78
  -5   4  -7   10.77    1.24
   5   4   7    9.53    1.18
   6  -4   7   10.41    1.01
   6  -4   7    9.51    1.20
   6  -4   7   10.54    0.77
  -6  -4  -7    9.37    1.24
  -6   4  -7    9.55    1.31
   6   4   7    9.16    1.26
   7  -4   7    1.46    0.44
   7  -4   7    0.30    0.84
  -7  -4  -7    1.65    0.89
  -7   4  -7    1.21    0.87
   7   4   7    2.00    0.95
  -8  -4  -7    6.24    1.32
   8  -4   7    3.99    1.22
  -8   4  -7    2.99    1.22
   8   4   7    4.30    1.34
  -9  -4  -7    0.47    1.21
   9   4   7   -0.06    1.22
  -9   4  -7   -3.86    1.20
  -9   5   7   -0.35    1.25
   9   5  -7    0.43    1.30
   8  -5  -7    0.94    0.73
  -8  -5   7    0.64    1.00
   8  -5  -7    1.04    1.21
  -8   5   7    1.42    1.05
   8   5  -7    0.69    0.94
  -7  -5   7    3.28    1.03
  -7   5   7    2.75    0.93
   7   5  -7    3.10    0.97
  -6  -5   7    1.07    0.70
  -6  -5   7    1.55    0.40
   6  -5  -7    1.64    0.78
  -6  -5   7    1.66    0.53
  -6   5   7    1.23    0.56
   6   5  -7    1.78    0.65
  -6   5   7    1.48    0.66
   5  -5  -7   74.84    3.16
  -5  -5   7   74.86    3.12
  -5  -5   7   73.14    2.40
  -5   5   7   72.37    2.77
   5   5  -7   75.66    2.97
  -5   5   7   72.99    2.72
   5   5  -7   71.79    2.49
   4  -5  -7    4.42    0.88
  -4  -5   7    5.17    0.58
   4   5  -7    5.13    0.73
  -4   5   7    4.55    0.65
   4   5  -7    5.00    0.70
  -4   5   7    4.93    0.64
  -3  -5   7    8.40    0.62
  -3  -5   7    8.98    0.76
   3  -5  -7    7.06    0.82
   3  -5  -7    7.56    0.60
   3   5  -7    7.77    0.76
  -3   5   7    7.76    0.68
   3   5  -7    7.26    0.65
  -3   5   7    6.52    0.57
  -2  -5   7    1.00    0.27
   2  -5  -7    0.82    0.25
  -2  -5   7    0.28    0.26
   2  -5  -7    1.31    0.42
  -2   5   7    0.69    0.22
   2   5  -7    1.52    0.40
   2   5  -7    0.99    0.25
  -2   5   7    1.12    0.35
   1  -5  -7    7.12    0.61
  -1  -5   7    8.68    0.63
  -1  -5   7    7.07    0.35
   1  -5  -7    7.62    0.46
  -1   5   7    8.65    0.46
  -1   5   7    7.13    0.64
   1   5  -7    7.28    0.65
   1   5  -7    8.24    0.36
  -1   5   7    8.28    0.66
   0  -5  -7    2.18    0.41
   0  -5  -7    2.52    0.31
   0  -5   7    1.46    0.34
   0  -5  -7    2.60    0.45
   0   5   7    2.96    0.47
   0   5   7    2.34    0.31
   0   5  -7    2.42    0.43
  -1  -5  -7   23.86    1.22
   1  -5   7   25.32    0.79
  -1  -5  -7   23.86    1.14
   1  -5   7   24.49    1.17
  -1  -5  -7   25.33    1.06
  -1  -5  -7   25.39    1.09
  -1   5  -7   27.48    1.30
  -1   5  -7   24.17    0.78
   1   5   7   23.91    1.15
  -2  -5  -7   37.54    1.51
  -2  -5  -7   41.50    1.65
   2  -5   7   40.46    1.42
   2  -5   7   40.85    1.63
  -2  -5  -7   38.32    1.59
   2   5   7   39.87    1.56
  -2   5  -7   38.36    1.75
   2   5   7   39.33    1.75
  -2   5  -7   39.15    1.41
  -3  -5  -7    4.28    0.52
   3  -5   7    5.64    0.57
   3  -5   7    5.60    0.63
  -3  -5  -7    8.30    0.90
  -3   5  -7    5.50    0.65
  -3   5  -7    5.30    0.76
   3   5   7    4.50    0.68
   3   5   7    5.52    0.52
  -4  -5  -7    0.44    0.30
   4  -5   7    0.66    0.34
   4  -5   7    0.70    0.39
  -4  -5  -7   -0.05    0.44
   4   5   7    0.05    0.40
   4   5   7    0.52    0.28
  -4   5  -7    0.22    0.40
  -5  -5  -7    5.59    0.93
   5  -5   7    5.14    0.84
  -5  -5  -7    6.67    0.51
  -5  -5  -7    6.11    0.51
   5  -5   7    6.29    0.71
  -5   5  -7    6.68    1.05
   5   5   7    6.78    1.02
   6  -5   7    0.33    0.64
  -6  -5  -7    0.69    0.68
   6  -5   7    1.27    0.49
  -6   5  -7    0.41    0.69
   6   5   7   -0.41    0.67
   7  -5   7    1.20    0.53
   7  -5   7   -0.35    0.87
  -7  -5  -7    2.36    0.94
  -7   5  -7   -0.61    0.95
   7   5   7    1.10    0.93
  -8  -5  -7    0.74    0.97
   8  -5   7    1.84    0.99
  -8   5  -7    0.15    1.06
   8   5   7   -0.21    0.96
   9  -5   7    2.45    1.65
  -9  -5  -7    0.96    1.44
  -9   5  -7   -0.54    1.57
   9   5   7    1.10    1.37
  -9  -6   7   -1.15    1.41
   9  -6  -7    1.15    1.44
  -9   6   7   -1.09    1.28
   9   6  -7   -1.15    1.36
   8  -6  -7    0.58    0.84
  -8  -6   7    0.21    1.00
   8  -6  -7    1.86    1.21
   8   6  -7    1.35    1.02
  -8   6   7    0.36    0.98
  -7  -6   7    3.83    0.56
   7  -6  -7    4.36    1.27
  -7  -6   7    4.68    1.21
   7   6  -7    4.29    1.03
  -7   6   7    5.65    1.12
   6  -6  -7    4.93    1.01
  -6  -6   7    7.52    1.23
  -6  -6   7    4.90    0.61
  -6   6   7    6.86    1.05
  -6   6   7    6.13    0.87
   6   6  -7    6.57    1.08
  -5  -6   7    0.75    0.36
   5  -6  -7    2.32    0.73
  -5  -6   7    0.88    0.58
  -5   6   7    0.46    0.51
   5   6  -7    0.49    0.53
  -5   6   7    0.90    0.56
  -4  -6   7   49.42    1.91
   4  -6  -7   51.85    2.39
  -4   6   7   50.47    2.01
   4   6  -7   52.00    2.14
   4   6  -7   52.59    2.37
  -4   6   7   49.88    2.16
  -3  -6   7    0.25    0.42
  -3  -6   7    0.34    0.30
   3  -6  -7   -0.17    0.34
   3  -6  -7    0.53    0.37
   3   6  -7    0.73    0.31
  -3   6   7    0.48    0.37
  -3   6   7    0.14    0.26
   2  -6  -7   30.64    1.49
  -2  -6   7   27.76    1.14
   2  -6  -7   27.99    1.16
  -2  -6   7   28.76    1.35
   2   6  -7   29.09    1.13
  -2   6   7   30.67    1.48
  -2   6   7   31.60    1.28
   2   6  -7   26.08    1.44
   1  -6  -7   67.63    2.13
  -1  -6   7   66.66    1.89
  -1  -6   7   70.53    2.46
   1  -6  -7   65.05    2.44
  -1   6   7   66.42    2.50
  -1   6   7   70.27    2.13
   1   6  -7   71.55    2.57
   0  -6  -7    0.40    0.26
   0  -6   7    0.52    0.27
   0  -6  -7   -0.08    0.23
   0   6  -7    0.20    0.28
   0   6   7    0.33    0.27
   1  -6   7   19.46    1.10
   1  -6   7   20.42    0.63
  -1  -6  -7   18.92    0.95
  -1  -6  -7   19.41    1.14
  -1  -6  -7   19.53    1.00
  -1   6  -7   20.99    1.18
   1   6   7   20.07    1.11
   2  -6   7   21.82    1.20
   2  -6   7   22.62    0.95
  -2  -6  -7   21.43    1.18
  -2   6  -7   23.00    0.94
   2   6   7   24.48    1.35
  -2   6  -7   23.05    1.32
   2   6   7   21.94    1.17
  -3  -6  -7   41.94    1.90
   3  -6   7   38.27    1.73
   3  -6   7   40.78    1.63
  -3   6  -7   38.50    1.92
   3   6   7   40.58    1.65
  -3   6  -7   39.74    1.62
   4  -6   7    1.05    0.45
   4  -6   7    0.80    0.39
  -4  -6  -7    1.12    0.42
  -4  -6  -7    1.99    0.64
   4   6   7    0.65    0.47
  -4   6  -7    1.33    0.55
  -5  -6  -7    0.86    0.36
  -5  -6  -7    0.67    0.62
   5  -6   7    1.24    0.59
   5  -6   7    1.09    0.47
  -5  -6  -7   -0.22    0.41
   5   6   7    0.18    0.54
  -5   6  -7    0.05    0.56
   6  -6   7    0.86    0.52
  -6  -6  -7    1.76    0.84
   6  -6   7    0.39    0.68
   6   6   7    0.22    0.72
  -6   6  -7    0.67    0.85
  -7  -6  -7    0.83    0.98
   7  -6   7    1.80    1.00
   7  -6   7    1.99    0.67
   7   6   7    3.31    1.19
  -7   6  -7    3.02    1.07
  -8  -6  -7    0.85    1.30
   8  -6   7    0.21    1.14
   8   6   7    0.62    1.10
  -8   6  -7    2.88    1.27
  -9  -7   7   -1.82    1.32
   9  -7  -7    2.27    1.52
  -9   7   7    0.67    1.40
   9   7  -7    1.51    1.53
  -8  -7   7    2.15    1.20
   8  -7  -7    0.95    0.92
   8  -7  -7    0.96    1.09
  -8   7   7    1.41    1.11
   8   7  -7    0.52    1.12
   7  -7  -7    1.87    0.97
  -7  -7   7    2.52    1.11
   7  -7  -7    1.00    0.75
  -7  -7   7    0.99    0.53
  -7   7   7   -0.08    0.87
   7   7  -7   -0.16    0.92
   6  -7  -7    2.10    0.80
  -6  -7   7    1.84    0.49
  -6  -7   7    1.47    0.92
  -6   7   7    0.77    0.70
  -6   7   7    1.38    0.68
   6   7  -7    2.59    0.83
   5  -7  -7   13.60    1.31
  -5  -7   7   13.75    1.34
  -5  -7   7   13.38    0.95
   5   7  -7   14.61    1.21
  -5   7   7   15.78    1.22
  -5   7   7   14.51    1.14
   4  -7  -7    0.83    0.51
  -4  -7   7    0.85    0.35
  -4   7   7    1.34    0.44
   4   7  -7    0.82    0.43
   4   7  -7    0.72    0.53
  -4   7   7    0.27    0.47
  -3  -7   7    1.39    0.49
   3  -7  -7    0.63    0.48
   3  -7  -7    1.42    0.45
  -3  -7   7    2.04    0.48
   3   7  -7    1.35    0.52
  -3   7   7    1.09    0.44
  -3   7   7    2.20    0.44
   3   7  -7    2.21    0.47
   2  -7  -7   12.09    0.96
  -2  -7   7   10.11    0.66
  -2  -7   7    8.89    0.80
  -2   7   7    9.39    0.65
   2   7  -7   10.26    0.61
  -2   7   7   11.79    1.28
  -1  -7   7    1.71    0.44
  -1  -7   7    1.61    0.20
   1  -7  -7    1.84    0.38
   1  -7  -7    1.21    0.43
  -1  -7   7    1.89    0.19
  -1   7   7    2.22    0.36
  -1   7   7    1.82    0.45
   1   7  -7    1.08    0.40
   0  -7   7    0.65    0.36
   0  -7  -7    0.18    0.29
   0   7  -7    0.23    0.31
   0   7   7    0.34    0.26
   0   7   7   -0.01    0.27
   1  -7   7    9.09    0.82
  -1  -7  -7   11.30    0.82
  -1  -7  -7   11.46    0.92
   1   7   7   10.42    0.84
  -1   7  -7   10.79    0.94
   2  -7   7    9.86    0.60
   2  -7   7   10.45    0.94
  -2  -7  -7    9.05    0.84
   2   7   7   11.35    0.88
  -2   7  -7    9.76    0.59
  -2   7  -7   10.36    0.93
   3  -7   7    9.23    0.89
   3  -7   7    8.11    0.70
  -3  -7  -7    8.84    1.02
   3   7   7    8.10    1.02
  -3   7  -7    8.11    0.79
  -3   7  -7    9.33    1.10
   3   7   7   10.13    0.81
   4  -7   7   -0.20    0.44
  -4  -7  -7    0.26    0.40
  -4  -7  -7    0.03    0.59
   4  -7   7    0.18    0.43
   4   7   7   -0.06    0.45
  -4   7  -7    0.73    0.53
   5  -7   7   10.63    1.00
  -5  -7  -7   10.42    0.88
  -5  -7  -7   12.72    0.89
   5  -7   7   10.32    1.16
  -5  -7  -7   11.58    1.45
   5   7   7   10.58    1.36
  -5   7  -7   11.47    1.42
   6  -7   7    2.26    0.87
   6  -7   7    2.66    0.72
   6   7   7    1.97    0.86
  -6   7  -7    3.82    1.01
   7  -7   7    1.62    1.13
  -7  -7  -7    5.17    1.24
   7  -7   7    3.74    0.85
  -7   7  -7    1.73    1.07
   7   7   7    0.72    1.03
   8  -7   7    1.48    1.26
   8  -8  -7   -0.11    1.30
   8  -8  -7    2.01    1.12
  -8   8   7    2.00    1.25
   8   8  -7    2.69    1.19
   7  -8  -7    0.09    0.93
  -7  -8   7    0.50    0.94
   7  -8  -7    0.24    0.84
  -7  -8   7   -0.16    0.56
   7   8  -7   -0.10    1.09
  -7   8   7    0.15    0.85
   6  -8  -7    0.93    0.88
  -6  -8   7   -0.59    0.45
  -6  -8   7    0.41    0.87
   6   8  -7    0.43    0.75
  -6   8   7   -0.04    0.72
  -6   8   7    1.11    0.72
  -5  -8   7   29.53    1.95
   5  -8  -7   24.36    1.78
  -5   8   7   23.74    1.66
  -5   8   7   25.65    1.52
   5   8  -7   27.16    1.63
   4  -8  -7   10.31    1.25
  -4  -8   7   13.12    1.09
  -4   8   7   10.51    1.15
   4   8  -7   12.10    1.37
  -4   8   7   12.69    1.02
   4   8  -7   11.53    0.97
  -3  -8   7    4.21    0.63
   3  -8  -7    3.83    0.77
  -3  -8   7    5.07    0.71
  -3   8   7    4.07    0.60
  -3   8   7    3.48    0.73
   3   8  -7    3.07    0.54
   3   8  -7    4.13    0.77
  -2  -8   7    0.54    0.41
  -2  -8   7   -0.08    0.32
   2  -8  -7    0.12    0.36
   2  -8  -7    0.41    0.42
   2   8  -7    0.21    0.25
   2   8  -7    0.36    0.40
  -2   8   7   -0.01    0.32
  -2   8   7   -0.14    0.37
   1  -8  -7    0.10    0.36
  -1  -8   7    0.11    0.16
  -1  -8   7    0.78    0.15
  -1  -8   7    0.59    0.38
   1  -8  -7    0.50    0.40
  -1   8   7    0.91    0.40
  -1   8   7    0.63    0.33
   1   8  -7    0.04    0.42
   0  -8   7    4.06    0.66
   0  -8  -7    4.68    0.64
   0  -8  -7    4.13    0.66
   0   8   7    5.02    0.75
   0   8   7    4.53    0.57
   0   8  -7    4.51    0.73
  -1  -8  -7    3.24    0.64
   1  -8   7    2.62    0.55
  -1   8  -7    3.33    0.63
   1   8   7    5.03    0.64
  -2  -8  -7    6.62    0.83
   2  -8   7    4.61    0.73
  -2  -8  -7    7.11    0.96
   2  -8   7    5.68    0.48
   2   8   7    6.04    0.77
  -2   8  -7    4.85    0.46
  -2   8  -7    5.77    0.82
   3  -8   7    0.95    0.52
   3  -8   7    0.26    0.35
  -3  -8  -7    0.72    0.54
  -3   8  -7    0.05    0.53
   3   8   7    0.36    0.42
   3   8   7    0.68    0.56
  -3   8  -7    1.07    0.47
  -4  -8  -7    0.88    0.52
   4  -8   7    1.15    0.53
  -4  -8  -7    0.18    0.65
   4  -8   7    0.89    0.51
   4   8   7    0.33    0.55
  -4   8  -7    1.55    0.73
   5  -8   7    4.26    0.80
   5  -8   7    3.55    0.76
  -5  -8  -7    3.61    0.95
  -5  -8  -7    2.57    0.65
  -5   8  -7    2.66    0.81
   5   8   7    4.72    1.00
   6  -8   7   -0.25    0.77
   6  -8   7   -0.14    0.68
  -6  -8  -7    0.21    0.49
  -6  -8  -7    2.37    1.03
   6   8   7    1.27    0.92
  -6   8  -7    0.87    0.88
  -7  -8  -7   10.85    1.82
   7  -8   7   11.15    1.22
   7   8   7   10.78    1.62
  -7   8  -7    7.87    1.54
  -8  -8  -7   -0.19    1.44
   8  -8   7    3.42    1.39
   8   8   7    2.11    1.31
  -8   8  -7    0.99    1.50
  -8  -9   7    0.46    1.50
   8  -9  -7   -1.87    1.15
   8  -9  -7    1.57    1.35
   8   9  -7    0.01    1.33
  -8   9   7   -1.94    1.27
   7  -9  -7    0.59    1.06
  -7  -9   7    0.63    1.05
   7  -9  -7    0.38    1.17
  -7   9   7   -0.03    0.94
   7   9  -7    0.25    1.00
  -6  -9   7    2.46    0.70
  -6  -9   7    0.01    1.03
   6   9  -7    1.38    0.89
  -6   9   7    1.19    0.81
  -5  -9   7    1.77    0.61
  -5  -9   7    1.27    0.93
   5  -9  -7    1.13    0.81
   5   9  -7    1.19    0.72
  -5   9   7    1.62    0.69
  -5   9   7    1.50    0.72
   4  -9  -7    1.44    0.73
  -4  -9   7    1.79    0.58
   4   9  -7    2.12    0.76
  -4   9   7    1.92    0.59
   4   9  -7    2.38    0.63
  -4   9   7    1.30    0.68
   3  -9  -7   -0.83    0.48
  -3  -9   7   -0.51    0.54
  -3  -9   7    0.10    0.49
  -3   9   7   -0.48    0.45
  -3   9   7    0.29    0.42
   3   9  -7    0.02    0.53
   3   9  -7   -0.33    0.38
  -2  -9   7    4.00    0.74
   2  -9  -7    3.98    0.82
  -2  -9   7    3.95    0.50
  -2   9   7    3.85    0.60
   2   9  -7    4.08    0.82
  -2   9   7    4.16    0.77
   1  -9  -7    2.79    0.61
  -1  -9   7    2.35    0.58
  -1  -9   7    2.57    0.23
   1   9  -7    2.36    0.61
  -1   9   7    2.45    0.46
  -1   9   7    2.25    0.60
   0  -9   7    5.42    0.80
   0  -9  -7    3.51    0.65
   0   9   7    3.16    0.69
   0   9   7    3.55    0.59
   0   9  -7    3.12    0.67
  -1  -9  -7   12.91    1.28
   1  -9   7   12.37    1.12
  -1   9  -7   13.11    1.12
   1   9   7   11.93    1.02
   1   9   7    9.63    0.93
   2  -9   7   15.75    0.75
   2  -9   7   16.93    1.26
  -2  -9  -7   18.23    1.25
  -2  -9  -7   17.55    1.31
   2   9   7   16.81    1.25
  -2   9  -7   16.53    0.75
  -2   9  -7   16.56    1.35
  -3  -9  -7    0.68    0.54
  -3  -9  -7    1.53    0.65
   3  -9   7    1.97    0.44
   3  -9   7    0.83    0.53
  -3   9  -7    0.86    0.66
  -3   9  -7    1.95    0.53
   4  -9   7    3.40    0.69
   4  -9   7    4.22    0.81
  -4  -9  -7    4.38    0.79
  -4  -9  -7    3.20    0.84
   4   9   7    4.08    0.89
  -4   9  -7    3.66    0.83
   5  -9   7    0.83    0.71
   5  -9   7    0.04    0.62
  -5  -9  -7    0.01    0.58
  -5  -9  -7    1.20    0.81
   5   9   7   -0.07    0.69
  -5   9  -7    0.37    0.85
   6  -9   7    0.32    0.94
  -6  -9  -7   -0.49    0.61
  -6  -9  -7    1.02    1.07
   6  -9   7    0.12    0.76
   6   9   7   -0.38    0.87
  -6   9  -7   -0.63    0.86
  -7  -9  -7   -0.31    1.28
   7  -9   7    1.37    0.98
   7  -9   7   -0.16    1.22
   7   9   7    1.25    1.11
  -7   9  -7    0.98    1.25
   7 -10  -7   -1.85    0.96
  -7 -10   7   -0.13    1.15
   7 -10  -7    0.19    1.26
   7  10  -7   -0.52    1.06
  -7  10   7    1.81    1.09
  -6 -10   7    2.66    1.08
  -6 -10   7    3.04    0.80
   6 -10  -7    1.81    0.97
   6 -10  -7    2.08    1.04
  -6  10   7    3.14    1.02
   6  10  -7    3.08    0.99
  -5 -10   7    6.31    1.25
   5 -10  -7    8.71    1.35
  -5 -10   7    7.13    0.97
  -5  10   7    9.68    1.19
  -5  10   7    7.57    1.15
   5  10  -7    7.05    1.02
   4 -10  -7    6.90    1.15
  -4 -10   7    8.51    1.02
  -4  10   7    6.23    1.03
   4  10  -7    9.55    1.31
   4  10  -7    7.43    0.90
  -4  10   7    7.47    1.16
  -3 -10   7   10.83    1.06
  -3 -10   7   10.38    1.11
   3 -10  -7   13.32    1.26
  -3  10   7   10.88    1.27
  -3  10   7   11.30    1.05
   3  10  -7   11.48    0.93
   3  10  -7   13.33    1.30
  -2 -10   7    0.23    0.53
  -2 -10   7   -0.15    0.40
   2 -10  -7   -0.23    0.50
  -2  10   7   -0.48    0.46
  -2  10   7   -0.68    0.43
   2  10  -7    0.26    0.55
   1 -10  -7    0.63    0.53
  -1 -10   7    2.50    0.68
  -1  10   7   -0.62    0.44
  -1  10   7    1.25    0.49
   1  10  -7    1.34    0.58
   0 -10  -7    8.02    0.99
   0 -10   7    8.27    1.07
   0  10   7   10.03    1.12
   0  10   7    8.58    0.94
   0  10  -7    8.49    1.06
  -1 -10  -7   45.12    2.16
   1 -10   7   45.07    2.23
  -1  10  -7   46.43    2.30
   1  10   7   45.45    2.03
   1  10   7   43.45    2.19
   2 -10   7    0.78    0.29
  -2 -10  -7    0.86    0.61
   2 -10   7    0.99    0.62
   2 -10   7    0.77    0.28
  -2 -10  -7   -0.01    0.54
  -2  10  -7    1.74    0.71
  -3 -10  -7    0.14    0.64
   3 -10   7    0.26    0.41
  -3 -10  -7   -0.07    0.65
   3 -10   7   -0.45    0.53
  -3 -10  -7   -0.88    0.60
  -3  10  -7   -0.99    0.55
  -3  10  -7    0.13    0.87
  -4 -10  -7    1.15    0.68
   4 -10   7   -0.12    0.60
   4 -10   7    0.59    0.73
  -4 -10  -7   -0.47    0.77
  -4  10  -7    1.45    0.84
   5 -10   7    0.72    0.84
   5 -10   7    1.68    0.77
  -5 -10  -7    2.24    0.76
  -5 -10  -7    0.51    0.95
   5  10   7   -1.16    0.74
  -5  10  -7    1.36    0.95
  -6 -10  -7    4.19    1.28
   6 -10   7    1.85    0.97
   6 -10   7    0.96    0.99
   6  10   7    1.86    1.22
  -6  10  -7    1.42    1.12
  -7 -10  -7    2.30    1.38
   7 -10   7    3.82    1.42
   7 -10   7    5.86    1.32
  -7  10  -7    5.47    1.65
   7  10   7    4.66    1.34
   7 -11  -7   -3.33    1.30
  -7 -11   7    2.17    1.35
   7 -11  -7    1.28    1.28
  -7  11   7   -1.12    1.21
   7  11  -7    1.10    1.28
   6 -11  -7    0.67    1.04
  -6 -11   7    1.97    0.89
  -6 -11   7    2.82    1.25
   6 -11  -7    2.25    1.29
   6  11  -7    1.90    1.08
  -6  11   7    0.42    1.07
  -5 -11   7    0.42    0.67
   5 -11  -7    0.63    0.79
   5 -11  -7    0.15    0.95
  -5 -11   7    0.05    0.88
   5  11  -7    0.25    0.76
  -5  11   7    0.43    0.77
  -4 -11   7    5.14    0.99
   4 -11  -7    5.79    1.07
  -4  11   7    3.47    0.80
   4  11  -7    3.67    1.09
   4  11  -7    3.67    0.79
  -3 -11   7    8.72    0.84
   3 -11  -7    6.12    1.08
  -3 -11   7    6.98    1.08
  -3  11   7    7.01    1.25
   3  11  -7    5.40    1.10
  -2 -11   7    5.39    0.64
  -2 -11   7    4.95    0.90
   2 -11  -7    5.93    1.00
  -2  11   7    6.29    0.82
  -2  11   7    7.70    1.14
   2  11  -7    4.24    0.92
  -1 -11   7    2.65    0.74
   1 -11  -7    2.18    0.66
  -1  11   7    1.28    0.58
   1  11  -7    2.02    0.74
  -1  11   7    0.86    0.65
   0 -11   7    2.39    0.78
   0 -11  -7    3.30    0.75
   0  11  -7    5.54    0.99
   0  11   7    4.15    0.86
   0  11   7    3.70    0.72
  -1 -11  -7   14.79    1.24
   1 -11   7   12.04    1.35
  -1  11  -7   12.18    1.36
   1  11   7   12.61    1.12
  -2 -11  -7    0.09    0.67
   2 -11   7    0.07    0.57
  -2 -11  -7    0.47    0.67
  -2 -11  -7   -1.02    0.64
  -2  11  -7   -0.05    0.61
  -3 -11  -7    1.19    0.66
  -3 -11  -7    1.13    0.81
  -3 -11  -7    1.19    0.84
   3 -11   7    0.01    1.13
   3 -11   7    1.30    0.50
  -3  11  -7    2.00    0.87
   4 -11   7    1.42    0.77
  -4 -11  -7    3.01    1.01
   4 -11   7    1.51    0.69
  -4 -11  -7    1.48    0.79
  -4 -11  -7    2.49    0.84
  -4  11  -7    2.04    0.90
  -5 -11  -7    2.68    1.20
  -5 -11  -7    1.59    0.88
   5 -11   7    3.86    1.00
   5 -11   7    4.96    1.15
  -5  11  -7    1.98    1.00
  -6 -11  -7    3.00    1.40
   6 -11   7    3.07    1.13
   6 -11   7    1.72    1.15
   6  11   7    2.61    1.26
  -6  11  -7    2.08    1.26
   6 -12  -7   -1.26    1.12
   6 -12  -7    0.24    1.26
  -6 -12   7   -0.52    1.39
  -6  12   7    1.44    1.35
   6  12  -7    0.18    1.16
   5 -12  -7    4.12    1.20
  -5 -12   7    2.79    1.21
   5 -12  -7    3.84    1.23
  -5  12   7    3.48    1.10
   5  12  -7    3.46    0.99
   4 -12  -7    0.69    0.95
  -4 -12   7    0.91    0.77
   4 -12  -7    0.18    0.92
  -4  12   7   -0.25    0.80
   4  12  -7    0.88    0.96
  -3 -12   7    1.30    0.58
   3 -12  -7   -0.12    0.77
  -3  12   7   -0.26    0.68
   3  12  -7    0.26    0.86
   2 -12  -7    2.31    0.83
  -2 -12   7    0.99    0.39
  -2  12   7    0.37    0.63
   2  12  -7   -0.11    0.76
   1 -12  -7   10.47    1.27
   1  12  -7   14.36    1.59
  -1  12   7   12.34    1.19
   0 -12  -7    6.59    1.02
   0 -12   7    5.99    1.09
   0  12   7    6.44    0.99
   0  12  -7    7.98    1.25
   1 -12   7    9.03    1.20
  -1 -12  -7   12.09    1.44
  -1 -12  -7    9.16    1.22
  -1  12  -7    8.42    1.29
   1  12   7   10.06    1.19
   2 -12   7   21.01    1.69
  -2 -12  -7   18.19    1.58
  -2 -12  -7   16.58    1.64
  -2 -12  -7   19.54    1.69
  -2  12  -7   16.15    1.98
  -3 -12  -7    1.42    0.86
  -3 -12  -7    2.60    0.95
   3 -12   7    1.12    0.85
  -3 -12  -7    0.14    0.88
  -3  12  -7    1.88    1.02
   4 -12   7    1.36    0.92
  -4 -12  -7    2.38    1.08
  -4 -12  -7    2.58    1.11
  -4 -12  -7    2.66    0.99
  -4  12  -7    1.36    1.11
  -5 -12  -7    0.07    1.16
   5 -12   7    2.32    1.01
  -5 -12  -7   -0.13    1.21
  -5 -12  -7    2.24    1.05
  -5  12  -7    1.22    1.23
   6 -12   7   -1.34    1.12
  -6 -12  -7    1.36    1.41
  -6  12  -7    1.71    1.42
   5 -13  -7    2.25    1.35
  -5 -13   7    0.59    1.03
   5 -13  -7   -1.45    1.20
  -5  13   7   -0.36    1.16
   4 -13  -7   -1.25    1.13
  -4 -13   7    1.04    0.93
   4 -13  -7   -0.56    0.93
  -4  13   7    1.28    0.98
   4  13  -7    1.69    1.19
   3 -13  -7    7.32    1.30
   3 -13  -7   10.82    1.54
  -3 -13   7   10.76    1.42
  -3  13   7    9.18    1.23
   3  13  -7    9.54    1.57
   2 -13  -7    2.90    0.92
  -2 -13   7    2.05    0.91
   2 -13  -7    1.05    1.01
   2  13  -7    2.76    0.97
  -2  13   7    1.71    0.86
   1 -13  -7   11.84    1.67
  -1 -13   7   10.71    1.47
   1 -13  -7   10.17    1.31
   1  13  -7   10.69    1.49
  -1  13   7   10.94    1.26
   0 -13  -7    2.00    0.83
   0 -13  -7    0.76    0.94
   0 -13   7    2.01    0.92
   0  13  -7    1.65    0.83
   0  13   7    1.77    0.77
  -1 -13  -7    1.44    0.79
   1 -13   7   -0.72    0.74
  -1 -13  -7    1.74    0.85
  -1  13  -7    1.23    0.95
   1  13   7   -0.20    0.76
   2 -13   7    2.18    0.89
  -2 -13  -7    1.06    0.92
  -2 -13  -7    1.44    0.98
  -2 -13  -7    1.26    0.90
  -2  13  -7    0.08    0.86
   3 -13   7    1.81    1.05
  -3 -13  -7    0.18    1.53
  -3 -13  -7   -1.21    0.94
  -3  13  -7    0.21    0.88
  -4 -13  -7    2.50    1.21
  -4 -13  -7    2.98    1.24
  -4 -13  -7    3.10    1.19
   4 -13   7    4.35    1.23
  -4  13  -7    2.64    1.21
  -5 -13  -7   -2.84    1.33
  -5 -13  -7   -0.97    1.38
  -5 -13  -7   -0.04    1.15
   5 -13   7    1.33    1.26
  -5  13  -7    3.55    1.49
   5 -14  -7    0.16    1.51
  -5  14   7   -0.81    1.38
  -4 -14   7    5.11    1.24
   4 -14  -7    2.40    1.29
  -4  14   7    1.64    1.21
  -3 -14   7    1.71    0.99
   3 -14  -7   -1.19    1.09
   3 -14  -7   -0.98    1.12
   3  14  -7    0.50    1.07
  -3  14   7   -0.16    0.99
   2 -14  -7    4.75    1.16
   2 -14  -7    4.80    1.26
  -2 -14   7    4.86    1.21
  -2  14   7    4.48    1.12
   2  14  -7    5.61    1.34
   1 -14  -7    4.47    1.13
   1 -14  -7    5.62    1.40
  -1 -14   7    9.76    1.40
  -1  14   7    6.60    1.19
   1  14  -7    6.88    1.46
   0 -14  -7    5.02    1.23
   0 -14  -7    3.83    1.08
   0 -14   7    4.76    1.20
   0  14  -7    2.23    1.16
   0  14   7    2.65    1.01
  -1 -14  -7    3.29    1.16
  -1 -14  -7    2.10    1.06
   1 -14   7    2.59    1.06
  -1  14  -7    3.32    1.22
   1  14   7    2.53    1.01
   2 -14   7   -0.03    0.94
  -2 -14  -7    0.30    0.99
  -2  14  -7    0.19    0.92
  -3 -14  -7    1.61    1.16
  -3 -14  -7    1.85    1.27
   3 -14   7    2.36    1.28
  -3 -14  -7    1.90    1.04
  -3  14  -7    3.32    1.31
   4 -14   7    6.65    1.58
  -4 -14  -7   12.39    1.74
  -4 -14  -7    8.71    1.81
  -4 -14  -7   12.76    1.88
  -4  14  -7    5.96    1.79
   3 -15  -7    0.34    1.24
  -3 -15   7    1.71    1.41
   3 -15  -7    0.54    1.38
   3  15  -7    1.56    1.51
  -3  15   7    1.88    1.35
   2 -15  -7    0.30    1.17
   2 -15  -7   -0.22    1.28
  -2 -15   7   -1.29    1.13
   2  15  -7   -0.18    1.29
  -2  15   7    0.72    1.16
  -1 -15   7    1.34    1.04
   1 -15  -7    0.37    1.18
  -1  15   7    2.40    1.17
   1  15  -7    2.38    1.17
   0 -15  -7    2.01    1.15
   0 -15  -7   -0.80    1.10
   0  15  -7   -0.91    1.17
   0  15   7    1.51    1.14
   1 -15   7   -0.12    1.23
  -1 -15  -7   -0.49    1.04
  -1  15  -7   -0.30    1.24
   2 -15   7   -1.03    1.13
  -2 -15  -7    1.24    1.24
  -2 -15  -7    1.49    1.27
  -2 -15  -7   -0.09    1.18
  -2  15  -7    0.40    1.32
   3 -15   7    8.89    1.60
  -3 -15  -7    5.67    1.54
  -3 -15  -7    7.39    1.63
  -3 -15  -7    7.36    1.61
  -3  15  -7    7.98    2.01
   0  16   7    1.78    1.42
   0  16  -7    1.72    1.49
  10   0  -8    0.55    1.43
 -10   0   8    1.72    1.59
   9   0  -8   -1.34    1.00
  -9   0   8    0.30    1.02
   8   0  -8    2.26    0.95
  -8   0   8    0.16    0.93
   7   0  -8    0.26    0.67
  -7   0   8    0.06    0.33
   7   0  -8    0.00    0.38
  -7   0   8    0.15    0.67
   6   0  -8    0.52    0.57
  -6   0   8    0.90    0.53
  -6   0   8    0.87    0.32
   5   0  -8   -0.32    0.43
  -5   0   8   -0.42    0.22
   5   0  -8    0.24    0.29
  -5   0   8   -0.04    0.36
  -4   0   8    0.15    0.27
   4   0  -8    0.28    0.38
  -4   0   8   -0.04    0.20
  -3   0   8   -0.07    0.16
  -3   0   8    0.47    0.31
   3   0  -8   -0.26    0.18
   3   0  -8   -0.10    0.22
  -3   0   8   -0.19    0.19
  -2   0   8   60.26    1.92
   2   0  -8   61.33    1.96
   2   0  -8   62.36    2.13
  -2   0   8   62.00    1.99
  -2   0   8   63.36    2.09
  -1   0   8    0.01    0.13
  -1   0   8    0.13    0.10
   1   0  -8    0.19    0.15
   1   0  -8    0.29    0.10
   1   0  -8    0.19    0.15
  -1   0   8    0.24    0.15
   0   0  -8   59.54    1.79
   0   0  -8   59.87    1.86
   0   0   8   58.74    1.79
   0   0  -8   60.91    1.89
  -1   0  -8    0.07    0.17
  -1   0  -8    0.14    0.14
   1   0   8    0.27    0.15
   1   0   8    0.33    0.16
   1   0   8    0.36    0.19
  -1   0  -8    0.20    0.20
   2   0   8   95.84    3.01
  -2   0  -8   95.45    2.73
   2   0   8   93.28    3.00
  -2   0  -8   95.57    3.03
  -2   0  -8   94.39    3.00
   2   0   8   92.98    2.75
  -3   0  -8   -0.31    0.23
  -3   0  -8   -0.19    0.16
   3   0   8   -0.21    0.22
   3   0   8    0.29    0.16
   4   0   8    2.89    0.58
  -4   0  -8    1.89    0.27
   4   0   8    2.67    0.29
  -4   0  -8    3.51    0.64
   5   0   8    0.12    0.14
   5   0   8    0.52    0.42
   5   0   8   -0.01    0.16
  -5   0  -8    0.44    0.53
  -6   0  -8   61.19    2.87
   6   0   8   62.32    2.86
  -7   0  -8    0.52    0.77
   7   0   8    1.04    1.34
   8   0   8    2.14    1.03
  -8   0  -8    1.51    1.10
  -9   0  -8    1.30    1.22
   9   0   8    0.34    1.17
  -9  -1   8    2.37    1.36
   9  -1  -8    3.10    1.28
  -9   1   8    2.46    1.10
   9   1  -8    1.87    1.09
   8  -1  -8    8.96    1.44
  -8  -1   8    9.89    1.45
   8   1  -8   10.32    1.56
   7  -1  -8    4.83    0.59
  -7  -1   8    5.58    1.04
   7  -1  -8    5.52    1.09
  -7  -1   8    5.63    0.53
  -7   1   8    4.67    0.95
   7   1  -8    6.00    1.16
   7   1  -8    4.99    0.49
  -7   1   8    4.94    0.58
   6  -1  -8    1.57    0.43
   6  -1  -8    1.98    0.70
  -6  -1   8    1.95    0.37
  -6  -1   8    2.50    0.67
  -6   1   8    1.60    0.42
  -6   1   8    1.51    0.57
   6   1  -8    1.42    0.57
   6   1  -8    1.59    0.39
  -5  -1   8    9.85    0.62
   5  -1  -8    8.96    1.10
   5  -1  -8    9.58    0.67
  -5  -1   8    9.08    0.88
  -5   1   8    8.12    0.93
   5   1  -8    9.86    1.12
   5   1  -8    8.77    0.68
  -5   1   8   10.51    0.69
   4  -1  -8   15.79    1.13
  -4  -1   8   18.28    1.10
  -4  -1   8   17.87    0.85
   4  -1  -8   17.26    0.86
   4   1  -8   19.01    1.20
  -4   1   8   18.06    0.89
   4   1  -8   17.15    0.81
  -4   1   8   17.24    1.02
  -3  -1   8    2.57    0.43
   3  -1  -8    2.68    0.51
  -3  -1   8    2.68    0.49
  -3  -1   8    3.10    0.39
  -3  -1   8    2.40    0.43
  -3   1   8    2.11    0.35
   3   1  -8    2.50    0.50
  -3   1   8    2.95    0.40
  -3   1   8    3.10    0.42
   3   1  -8    2.12    0.32
   2  -1  -8   11.96    0.64
  -2  -1   8   12.12    0.69
  -2  -1   8   13.44    0.68
  -2  -1   8   12.50    0.65
   2  -1  -8   11.61    0.73
  -2   1   8   11.40    0.72
   2   1  -8   12.22    0.67
  -2   1   8   12.09    0.57
   2   1  -8   11.35    0.69
  -2   1   8   11.84    0.56
  -2   1   8   11.51    0.65
   2   1  -8   12.82    0.63
   1  -1  -8    5.63    0.44
  -1  -1   8    5.29    0.38
   1  -1  -8    4.80    0.26
   1  -1  -8    5.75    0.42
  -1  -1   8    5.38    0.39
  -1  -1   8    5.50    0.40
  -1   1   8    5.38    0.26
   1   1  -8    5.72    0.39
   1   1  -8    5.58    0.39
  -1   1   8    5.87    0.44
   1   1  -8    5.56    0.39
  -1   1   8    4.46    0.40
   0  -1   8   11.18    0.58
   0  -1  -8   10.96    0.57
   0  -1   8   10.83    0.57
   0  -1  -8   11.73    0.46
   0   1  -8   11.31    0.54
   0   1  -8   11.38    0.58
   0   1  -8   11.40    0.57
   0   1   8   10.89    0.65
   0   1  -8   11.31    0.54
   0   1   8   11.15    0.46
   0   1   8   10.67    0.61
  -1  -1  -8   51.62    1.70
   1  -1   8   51.48    1.78
  -1  -1  -8   52.12    1.67
   1  -1   8   54.81    1.73
  -1  -1  -8   54.00    1.84
   1  -1   8   56.07    1.82
  -1   1  -8   50.52    1.67
   1   1   8   52.94    1.84
   1   1   8   50.91    1.69
  -1   1  -8   50.26    1.71
  -1   1  -8   51.95    1.78
   1   1   8   51.93    1.68
   2  -1   8   54.32    1.96
  -2  -1  -8   52.42    1.90
  -2  -1  -8   53.18    1.67
   2  -1   8   54.16    1.90
  -2  -1  -8   53.33    1.98
   2   1   8   55.42    1.71
  -2   1  -8   55.12    1.99
   2   1   8   51.84    1.91
   2   1   8   56.55    2.01
  -2   1  -8   50.32    1.71
  -3  -1  -8   97.61    3.15
   3  -1   8   95.66    3.10
  -3  -1  -8   89.58    2.62
   3  -1   8   86.96    2.78
  -3   1  -8   89.77    2.71
  -3   1  -8   93.11    3.16
   3   1   8   93.20    2.66
   3   1   8   89.81    3.14
  -4  -1  -8   16.01    1.17
   4  -1   8   17.70    1.13
   4  -1   8   17.70    0.75
  -4  -1  -8   16.16    0.66
  -4   1  -8   16.72    0.78
   4   1   8   15.58    1.15
   4   1   8   17.54    0.67
  -4   1  -8   16.98    1.16
  -5  -1  -8    5.65    0.93
   5  -1   8    4.48    0.80
   5  -1   8    4.64    0.45
   5  -1   8    4.82    0.41
   5   1   8    4.73    0.83
  -5   1  -8    6.27    0.98
   6  -1   8   15.40    1.46
  -6  -1  -8   19.11    1.51
   6   1   8   17.48    1.46
  -6   1  -8   19.00    1.54
   7  -1   8    7.25    1.52
  -7  -1  -8    5.05    1.04
   7   1   8    7.72    1.26
  -7   1  -8    7.30    1.27
  -8  -1  -8    2.57    0.98
   8  -1   8    2.08    0.96
  -8   1  -8    0.73    1.05
   8   1   8    1.00    0.91
  -9  -1  -8    1.02    1.38
   9  -1   8    0.39    1.40
  -9   1  -8    1.20    1.44
   9   1   8    1.12    1.32
   9  -2  -8    1.66    1.16
  -9  -2   8    2.87    1.32
   9   2  -8    3.66    1.15
  -9   2   8    2.63    1.24
  -8  -2   8    0.09    0.96
   8  -2  -8    0.11    0.86
   8   2  -8    1.05    1.05
  -8   2   8    1.48    0.94
   7  -2  -8   19.64    1.08
   7  -2  -8   18.27    1.68
  -7  -2   8   17.38    1.64
  -7  -2   8   18.20    0.82
  -7   2   8   19.91    1.10
  -7   2   8   17.35    1.52
   7   2  -8   19.52    0.88
   7   2  -8   17.62    1.59
  -6  -2   8    4.82    0.91
  -6  -2   8    4.55    0.48
   6  -2  -8    3.68    0.83
   6  -2  -8    4.07    0.67
  -6   2   8    4.13    0.57
   6   2  -8    2.39    0.72
  -6   2   8    4.53    0.82
   6   2  -8    3.48    0.50
   5  -2  -8    0.67    0.45
  -5  -2   8    1.29    0.33
   5  -2  -8    0.65    0.38
   5   2  -8    0.90    0.54
  -5   2   8    1.18    0.35
  -5   2   8    1.16    0.44
  -4  -2   8    0.48    0.24
   4  -2  -8    0.12    0.35
   4  -2  -8    0.57    0.39
   4  -2  -8    0.31    0.28
  -4  -2   8    0.78    0.35
  -4   2   8   -0.03    0.24
   4   2  -8    0.46    0.35
  -4   2   8    0.36    0.32
   3  -2  -8    8.56    0.59
  -3  -2   8    8.40    0.72
  -3  -2   8    8.41    0.66
   3  -2  -8    8.17    0.74
  -3  -2   8    8.76    0.57
   3  -2  -8    8.96    0.59
  -3   2   8    9.50    0.64
   3   2  -8    9.27    0.69
   3   2  -8    8.79    0.73
   3   2  -8    8.58    0.63
  -3   2   8    9.72    0.60
  -2  -2   8   15.09    0.77
   2  -2  -8   14.97    0.77
   2  -2  -8   17.17    0.92
  -2  -2   8   15.47    0.74
   2   2  -8   15.95    0.83
  -2   2   8   16.86    0.82
   2   2  -8   15.38    0.75
  -2   2   8   13.86    0.84
  -2   2   8   15.01    0.63
   1  -2  -8   27.26    1.11
  -1  -2   8   28.22    1.09
   1  -2  -8   29.65    1.20
  -1  -2   8   25.82    1.08
  -1  -2   8   27.23    0.98
   1   2  -8   29.47    1.13
  -1   2   8   27.21    1.17
   1   2  -8   26.80    1.08
   1   2  -8   29.79    1.02
  -1   2   8   29.51    1.15
   0  -2  -8   29.57    1.23
   0  -2  -8   31.85    0.94
   0  -2  -8   31.58    1.17
   0  -2   8   30.99    1.17
   0  -2   8   30.99    1.19
   0   2   8   32.56    1.27
   0   2  -8   31.71    1.02
   0   2  -8   30.69    1.19
   0   2   8   31.65    0.94
   0   2  -8   30.72    1.17
   0   2  -8   32.00    1.03
   0   2   8   29.50    1.18
   1  -2   8    6.97    0.43
   1  -2   8    8.38    0.52
  -1  -2  -8    6.39    0.44
  -1  -2  -8    6.51    0.56
  -1  -2  -8    7.21    0.46
   1   2   8    7.06    0.47
   1   2   8    7.37    0.49
  -1   2  -8    6.18    0.52
  -1   2  -8    7.27    0.48
  -1   2  -8    6.72    0.44
   1   2   8    6.88    0.57
   2  -2   8   28.50    1.10
   2  -2   8   28.39    1.17
  -2  -2  -8   28.97    1.23
  -2  -2  -8   28.14    1.05
   2  -2   8   27.41    1.29
  -2  -2  -8   28.24    1.32
   2   2   8   27.19    1.07
  -2   2  -8   28.39    1.13
   2   2   8   28.58    1.32
  -2   2  -8   28.44    1.32
   2   2   8   27.41    1.35
  -2   2  -8   26.83    1.18
  -3  -2  -8   10.22    0.53
   3  -2   8   10.52    0.78
   3  -2   8   10.89    0.61
  -3  -2  -8   11.27    0.85
  -3   2  -8   10.07    0.65
   3   2   8   10.91    0.84
   3   2   8   10.71    0.56
  -3   2  -8   10.30    0.84
  -3   2  -8   10.59    0.86
   4  -2   8    6.66    0.81
   4  -2   8    8.37    0.56
  -4  -2  -8    9.31    0.46
  -4  -2  -8   10.15    0.88
   4   2   8    9.16    0.48
  -4   2  -8    8.89    0.64
   5  -2   8    0.49    0.49
  -5  -2  -8    2.28    0.60
   5  -2   8    1.02    0.29
   5  -2   8    1.10    0.36
  -5   2  -8    0.79    0.50
   5   2   8    0.45    0.46
   6  -2   8    1.30    0.30
   6  -2   8    0.37    0.64
  -6  -2  -8    1.60    0.63
   6  -2   8    1.88    0.36
   6   2   8    1.28    0.65
  -6   2  -8    1.71    0.73
   7  -2   8    2.26    0.80
  -7  -2  -8    4.67    1.08
   7   2   8    3.66    0.99
  -7   2  -8    2.57    0.90
  -8  -2  -8   -0.92    0.91
   8  -2   8    0.33    0.98
  -8   2  -8   -0.40    0.87
   8   2   8    2.24    1.06
  -9  -2  -8    0.42    1.28
   9   2   8   -1.50    1.32
  -9   2  -8   -0.87    1.15
   9  -3  -8    2.12    1.31
  -9  -3   8    3.73    1.36
  -9   3   8    1.60    1.14
   9   3  -8    1.62    1.15
  -8  -3   8   -0.24    0.95
   8  -3  -8   -0.03    0.88
   8   3  -8    0.71    0.93
  -8   3   8    0.15    0.93
  -7  -3   8    0.41    0.69
  -7  -3   8   -0.33    0.31
   7  -3  -8   -0.38    0.64
  -7   3   8   -0.32    0.45
   7   3  -8   -0.91    0.71
  -7   3   8    0.21    0.67
  -6  -3   8   -0.03    0.52
  -6  -3   8    0.36    0.29
   6  -3  -8    0.56    0.62
   6   3  -8    0.26    0.63
  -6   3   8    1.01    0.42
   6   3  -8   -0.16    0.56
  -6   3   8    0.84    0.55
  -5  -3   8    7.28    0.97
  -5  -3   8    6.49    0.55
   5  -3  -8    5.58    0.93
  -5   3   8    6.87    0.65
   5   3  -8    7.69    0.66
  -5   3   8    6.63    0.83
   4  -3  -8   20.38    1.10
  -4  -3   8   19.81    0.94
   4  -3  -8   20.89    1.34
  -4  -3   8   20.96    1.26
   4   3  -8   21.59    1.00
   4   3  -8   18.94    1.22
  -4   3   8   20.60    1.08
  -4   3   8   21.97    1.10
   3  -3  -8   15.21    0.86
  -3  -3   8   13.99    0.74
   3  -3  -8   15.67    1.01
  -3  -3   8   15.07    0.91
   3  -3  -8   13.79    0.74
   3   3  -8   12.61    0.89
   3   3  -8   14.04    0.77
   3   3  -8   14.85    0.90
  -3   3   8   12.60    0.81
   2  -3  -8   10.80    0.50
   2  -3  -8   10.67    0.74
  -2  -3   8   11.02    0.63
   2  -3  -8   10.30    0.67
  -2  -3   8   10.40    0.71
  -2  -3   8   10.97    0.64
  -2   3   8   11.05    0.70
   2   3  -8   11.03    0.66
   2   3  -8   11.36    0.68
   2   3  -8    9.20    0.68
  -2   3   8   10.41    0.76
  -2   3   8   11.28    0.51
   1  -3  -8    2.18    0.35
   1  -3  -8    1.69    0.32
  -1  -3   8    1.65    0.29
  -1  -3   8    1.77    0.22
  -1  -3   8    1.46    0.32
   1   3  -8    1.78    0.30
   1   3  -8    2.07    0.35
   1   3  -8    1.54    0.22
  -1   3   8    1.20    0.28
  -1   3   8    1.00    0.28
   0  -3   8   15.27    0.79
   0  -3  -8   11.87    0.47
   0  -3   8   12.32    0.69
   0  -3  -8   12.17    0.74
   0  -3  -8   11.06    0.67
   0  -3  -8   12.22    0.47
   0   3  -8   13.43    0.75
   0   3   8   13.29    0.72
   0   3  -8   13.08    0.71
   0   3  -8   12.48    0.46
   0   3  -8   12.23    0.46
  -1  -3  -8    1.82    0.28
  -1  -3  -8    1.09    0.33
   1  -3   8    1.58    0.39
  -1  -3  -8    1.16    0.25
   1  -3   8    1.85    0.24
   1  -3   8    1.44    0.29
   1   3   8    1.34    0.28
   1   3   8    1.61    0.28
  -1   3  -8    1.51    0.33
  -1   3  -8    1.19    0.22
  -1   3  -8    1.32    0.33
   2  -3   8    6.60    0.50
  -2  -3  -8    6.28    0.47
  -2  -3  -8    7.01    0.59
   2  -3   8    6.79    0.50
   2   3   8    6.75    0.62
   2   3   8    6.58    0.58
  -2   3  -8    7.80    0.57
  -2   3  -8    7.25    0.67
  -2   3  -8    6.27    0.53
   2   3   8    6.86    0.50
  -3  -3  -8   -0.16    0.20
  -3  -3  -8   -0.16    0.30
   3  -3   8   -0.34    0.24
   3  -3   8   -0.12    0.20
  -3   3  -8    0.16    0.29
  -3   3  -8    0.09    0.30
   3   3   8    0.24    0.29
  -3   3  -8    0.21    0.35
  -4  -3  -8    0.62    0.21
   4  -3   8    1.15    0.42
   4  -3   8    0.46    0.26
  -4  -3  -8    0.35    0.35
   4   3   8    0.78    0.23
   4   3   8    0.46    0.40
  -4   3  -8    1.01    0.47
   5  -3   8    9.15    0.65
   5  -3   8    9.07    0.77
  -5  -3  -8   10.24    1.21
   5  -3   8   10.06    0.99
   5   3   8   10.20    1.18
  -5   3  -8    8.69    1.11
   6  -3   8    5.33    0.96
   6  -3   8    6.93    0.58
  -6  -3  -8    6.37    1.08
   6   3   8    5.79    1.07
  -6   3  -8    7.02    1.16
  -7  -3  -8    0.96    0.80
   7  -3   8    1.18    0.77
   7  -3   8    1.23    0.33
   7   3   8    1.05    0.77
  -7   3  -8    0.79    0.91
   8  -3   8    0.19    0.89
  -8  -3  -8    0.39    0.94
  -8   3  -8    0.92    0.98
   8   3   8    0.86    0.99
   9  -3   8    1.62    1.41
  -9  -3  -8    0.79    1.41
   9   3   8    2.07    1.50
  -9   3  -8    3.29    1.48
  -9  -4   8    2.42    1.31
   9  -4  -8    2.13    1.20
   9   4  -8    3.04    1.39
  -9   4   8    2.52    1.30
   8  -4  -8   -0.10    0.97
  -8  -4   8    0.60    1.02
   8  -4  -8    1.22    0.66
  -8   4   8    0.86    1.14
   8   4  -8   -0.06    0.92
   7  -4  -8   -1.11    0.65
  -7  -4   8   -0.55    0.43
  -7  -4   8    0.61    0.83
  -7   4   8    0.18    0.71
  -7   4   8   -0.21    0.51
   7   4  -8    0.06    0.73
  -6  -4   8   -0.11    0.51
  -6  -4   8   -0.06    0.31
   6  -4  -8    0.45    0.61
   6   4  -8   -0.30    0.48
   6   4  -8    0.47    0.64
  -6   4   8   -0.17    0.40
  -6   4   8    1.24    0.58
   5  -4  -8    8.84    1.15
  -5  -4   8   11.48    1.12
  -5  -4   8    9.22    0.67
   5   4  -8    9.35    1.23
  -5   4   8    8.12    0.77
  -5   4   8    7.06    0.85
   5   4  -8   10.42    0.79
   4  -4  -8   14.65    0.97
   4  -4  -8   16.32    1.18
  -4  -4   8   15.30    1.11
  -4  -4   8   15.51    0.83
  -4   4   8   14.80    0.92
   4   4  -8   14.64    1.05
  -4   4   8   15.24    0.96
   4   4  -8   15.76    0.94
   3  -4  -8    0.14    0.30
  -3  -4   8    0.73    0.35
   3  -4  -8    1.06    0.28
  -3  -4   8    0.85    0.26
  -3   4   8    0.49    0.30
   3   4  -8    0.50    0.31
  -3   4   8    0.80    0.29
   3   4  -8    1.00    0.35
   3   4  -8    0.52    0.33
  -2  -4   8   59.44    2.03
   2  -4  -8   58.27    1.77
   2  -4  -8   57.28    2.20
  -2  -4   8   56.97    1.91
   2   4  -8   60.23    2.20
   2   4  -8   59.31    1.93
   2   4  -8   56.23    2.04
  -2   4   8   61.80    2.17
  -2   4   8   59.17    1.76
  -1  -4   8   48.86    1.91
   1  -4  -8   51.17    1.88
  -1  -4   8   53.56    1.52
  -1  -4   8   52.86    1.86
   1  -4  -8   52.49    1.46
   1  -4  -8   50.20    1.92
  -1   4   8   54.38    1.94
   1   4  -8   51.46    1.53
  -1   4   8   53.54    1.46
   1   4  -8   52.78    1.95
   1   4  -8   50.71    1.87
  -1   4   8   49.41    1.90
   0  -4  -8    2.64    0.25
   0  -4  -8    2.81    0.48
   0  -4   8    2.78    0.40
   0  -4  -8    2.95    0.46
   0  -4   8    3.08    0.48
   0  -4  -8    2.42    0.43
   0  -4  -8    2.91    0.29
   0   4  -8    3.26    0.47
   0   4   8    2.29    0.40
   0   4  -8    2.65    0.45
  -1  -4  -8   27.39    1.08
  -1  -4  -8   27.91    1.09
  -1  -4  -8   27.56    1.17
   1  -4   8   28.45    0.92
   1  -4   8   26.26    1.20
  -1  -4  -8   28.40    1.32
   1   4   8   28.94    1.23
  -1   4  -8   27.59    1.29
  -1   4  -8   27.41    0.94
  -1   4  -8   27.00    1.22
  -2  -4  -8    7.93    0.64
  -2  -4  -8    8.25    0.59
  -2  -4  -8    7.40    0.65
   2  -4   8    8.85    0.64
   2  -4   8    9.21    0.65
   2   4   8    7.74    0.70
  -2   4  -8    8.37    0.59
   2   4   8    9.07    0.62
  -2   4  -8    8.29    0.79
  -2   4  -8    7.80    0.72
  -3  -4  -8   -0.05    0.22
   3  -4   8    0.27    0.25
   3  -4   8    0.30    0.29
  -3  -4  -8   -0.15    0.33
  -3   4  -8    0.03    0.33
   3   4   8    0.03    0.22
   3   4   8   -0.30    0.29
  -3   4  -8    0.22    0.35
   4  -4   8    6.33    0.61
   4  -4   8    6.04    0.77
  -4  -4  -8    6.93    0.53
  -4  -4  -8    8.98    1.15
   4   4   8    7.46    0.98
  -4   4  -8    8.89    1.07
   5  -4   8    1.94    0.63
  -5  -4  -8    1.91    0.26
  -5  -4  -8    1.73    0.28
   5  -4   8    1.71    0.41
  -5  -4  -8    1.61    0.68
   5   4   8    1.67    0.64
  -5   4  -8    1.52    0.70
  -6  -4  -8   -0.20    0.59
   6  -4   8   -0.37    0.59
   6  -4   8    0.91    0.40
  -6   4  -8    0.72    0.68
   6   4   8   -0.04    0.65
   7  -4   8    0.43    0.83
  -7  -4  -8    0.05    0.73
   7  -4   8    1.50    0.46
  -7   4  -8    1.38    0.88
   7   4   8   -0.18    0.77
  -8  -4  -8    5.73    1.29
   8  -4   8    6.20    1.25
  -8   4  -8    2.22    1.18
   8   4   8    4.10    1.23
   9  -4   8    1.06    1.36
  -9  -4  -8    2.02    1.31
   9   4   8   -1.00    1.16
  -9   4  -8    2.58    1.47
  -9   5   8   -1.47    1.23
   9   5  -8   -1.02    1.08
  -8  -5   8    2.81    1.20
   8  -5  -8   -0.56    1.07
   8  -5  -8    1.76    1.24
   8   5  -8    0.34    1.06
  -7  -5   8    0.67    0.79
  -7  -5   8    1.04    0.42
   7  -5  -8    0.58    0.78
   7   5  -8    1.22    0.86
  -7   5   8   -0.58    0.59
  -7   5   8    0.86    0.81
  -6  -5   8    2.18    0.45
   6  -5  -8    0.35    0.62
  -6  -5   8    2.02    0.74
   6   5  -8    1.22    0.73
   6   5  -8    2.81    0.62
  -6   5   8    2.12    0.69
  -5  -5   8   82.23    3.37
   5  -5  -8   81.15    3.41
  -5  -5   8   80.53    2.66
  -5   5   8   81.28    2.99
   5   5  -8   83.79    3.22
  -5   5   8   83.63    3.00
   4  -5  -8   39.40    1.71
  -4  -5   8   41.69    1.62
   4  -5  -8   44.54    2.12
   4   5  -8   42.75    1.88
  -4   5   8   42.04    1.72
   4   5  -8   40.84    2.00
  -4   5   8   41.65    1.83
   3  -5  -8   33.02    1.31
   3  -5  -8   31.37    1.61
  -3  -5   8   32.13    1.38
  -3  -5   8   35.04    1.47
   3   5  -8   33.19    1.64
  -3   5   8   34.15    1.55
  -3   5   8   32.28    1.29
   3   5  -8   31.35    1.40
   2  -5  -8   25.92    1.33
  -2  -5   8   26.03    1.05
   2  -5  -8   25.59    0.99
  -2  -5   8   25.85    1.20
  -2   5   8   25.39    1.29
   2   5  -8   25.35    1.33
   2   5  -8   26.95    1.05
  -2   5   8   27.93    0.99
  -1  -5   8   58.24    1.61
   1  -5  -8   57.45    1.72
  -1  -5   8   61.73    2.13
   1  -5  -8   57.35    2.15
  -1   5   8   57.91    1.71
   1   5  -8   57.71    1.61
  -1   5   8   55.14    2.13
   1   5  -8   55.17    2.16
   0  -5   8   65.24    2.31
   0  -5  -8   65.49    2.36
   0  -5  -8   63.46    1.96
   0   5   8   69.01    2.37
   0   5  -8   65.45    2.38
   1  -5   8    0.46    0.25
   1  -5   8    0.67    0.13
  -1  -5  -8    0.33    0.26
  -1  -5  -8    0.53    0.23
  -1  -5  -8    0.81    0.27
  -1   5  -8    0.32    0.30
   1   5   8    0.81    0.32
  -1   5  -8    0.73    0.13
   2  -5   8    4.93    0.60
   2  -5   8    4.10    0.45
  -2  -5  -8    3.87    0.53
  -2  -5  -8    4.92    0.62
  -2  -5  -8    3.36    0.47
   2   5   8    3.20    0.58
   2   5   8    3.61    0.51
  -2   5  -8    5.30    0.70
  -2   5  -8    4.70    0.46
   3  -5   8   11.36    0.81
  -3  -5  -8    9.84    0.71
  -3  -5  -8    9.02    0.85
   3  -5   8    9.85    0.72
   3   5   8    9.67    0.93
  -3   5  -8   10.38    0.85
   3   5   8   10.52    0.72
   4  -5   8    0.28    0.36
  -4  -5  -8   -0.31    0.36
  -4  -5  -8    0.24    0.32
   4  -5   8   -0.45    0.28
   4   5   8    0.26    0.29
  -4   5  -8    0.67    0.48
   4   5   8   -0.29    0.36
  -5  -5  -8    2.15    0.74
  -5  -5  -8    2.86    0.38
   5  -5   8    2.23    0.52
   5  -5   8    3.30    0.73
  -5  -5  -8    3.36    0.54
   5   5   8    3.33    0.84
  -5   5  -8    2.81    0.79
  -6  -5  -8    0.39    0.78
   6  -5   8    0.22    0.71
   6  -5   8   -0.28    0.46
  -6   5  -8    0.58    0.70
   6   5   8    0.08    0.66
   7  -5   8   -0.18    0.83
  -7  -5  -8    1.39    1.00
   7  -5   8    0.50    0.52
   7   5   8   -0.09    0.78
  -7   5  -8    0.62    1.02
  -8  -5  -8    1.63    1.08
   8  -5   8    0.46    1.14
  -8   5  -8    3.04    1.40
   8   5   8    2.42    1.13
  -9  -6   8   -1.09    1.48
   9  -6  -8    1.03    1.28
   9   6  -8    1.07    1.40
  -9   6   8    0.79    1.38
  -8  -6   8    3.18    1.16
   8  -6  -8    1.14    1.28
   8  -6  -8    1.64    0.92
  -8   6   8    3.79    1.12
   8   6  -8    3.36    1.29
   7  -6  -8   -0.76    0.80
  -7  -6   8    0.07    0.77
  -7  -6   8   -0.27    0.47
  -7   6   8    0.64    0.80
   7   6  -8    1.35    0.91
  -7   6   8   -0.24    0.65
  -6  -6   8   12.70    1.55
  -6  -6   8   10.28    0.85
   6  -6  -8   13.01    1.59
   6   6  -8   11.69    1.35
  -6   6   8   12.00    1.19
  -6   6   8   11.16    1.09
  -5  -6   8   -0.06    0.34
   5  -6  -8    0.72    0.58
  -5  -6   8    0.97    0.54
  -5   6   8    0.50    0.46
  -5   6   8    0.33    0.48
   5   6  -8   -0.05    0.51
   4  -6  -8   16.96    1.36
  -4  -6   8   19.01    1.03
   4   6  -8   17.59    1.14
   4   6  -8   17.14    1.32
  -4   6   8   20.27    1.10
   3  -6  -8    1.75    0.50
  -3  -6   8    2.12    0.50
  -3  -6   8    2.63    0.46
  -3   6   8    2.78    0.57
  -3   6   8    2.29    0.40
   3   6  -8    2.67    0.46
   3   6  -8    2.40    0.56
   2  -6  -8    9.86    0.60
  -2  -6   8    8.34    0.57
  -2  -6   8    8.73    0.71
   2  -6  -8    8.84    0.78
   2   6  -8    8.97    0.56
  -2   6   8    8.47    0.53
  -2   6   8    8.68    0.80
   2   6  -8   10.09    0.84
   1  -6  -8    1.71    0.40
   1  -6  -8    1.20    0.28
  -1  -6   8    1.32    0.39
  -1   6   8    1.54    0.37
   1   6  -8    1.62    0.43
  -1   6   8    1.39    0.26
   0  -6   8  197.84    5.82
   0  -6  -8  196.90    5.42
   0  -6  -8  195.16    5.86
   0   6   8  196.07    5.85
   0   6  -8  202.12    5.94
   0   6   8  196.15    5.43
  -1  -6  -8    0.75    0.35
   1  -6   8    0.87    0.30
  -1  -6  -8    0.86    0.29
   1   6   8    0.80    0.35
  -1   6  -8    0.33    0.32
  -2  -6  -8    0.89    0.37
   2  -6   8    1.46    0.42
   2  -6   8    1.43    0.28
  -2   6  -8    1.91    0.48
   2   6   8    1.57    0.46
  -2   6  -8    1.31    0.30
   2   6   8    1.90    0.44
  -3  -6  -8   26.14    1.45
   3  -6   8   26.03    1.21
   3  -6   8   24.37    1.33
  -3   6  -8   25.35    1.27
   3   6   8   27.42    1.26
   3   6   8   22.59    1.47
  -3   6  -8   25.57    1.49
  -4  -6  -8    1.52    0.43
   4  -6   8    1.20    0.44
  -4  -6  -8    0.40    0.55
   4  -6   8    1.42    0.45
   4   6   8    1.83    0.42
   4   6   8    1.01    0.61
  -4   6  -8    0.70    0.54
   5  -6   8    4.78    0.83
  -5  -6  -8    3.59    0.53
   5  -6   8    3.08    0.65
  -5  -6  -8    3.22    0.84
  -5  -6  -8    2.98    0.76
  -5   6  -8    2.96    0.90
   5   6   8    3.65    0.95
  -6  -6  -8    2.49    0.85
   6  -6   8    3.16    0.96
   6  -6   8    3.06    0.85
   6   6   8    4.39    1.25
  -6   6  -8    3.64    1.13
   7  -6   8    2.36    0.68
   7  -6   8    2.77    1.11
  -7  -6  -8    2.63    1.12
  -7   6  -8    0.32    0.96
   7   6   8    1.20    0.93
  -8  -6  -8    0.42    1.29
   8  -6   8    4.40    1.31
   8   6   8    6.28    1.56
  -8   6  -8    2.80    1.41
  -9  -7   8    2.56    1.52
   9  -7  -8   -0.76    1.53
   9   7  -8    0.92    2.25
  -9   7   8    0.03    1.48
   8  -7  -8   -0.93    1.06
   8  -7  -8    0.37    0.95
  -8  -7   8    2.40    1.20
  -8   7   8   -0.96    1.06
   8   7  -8    0.79    0.99
  -7  -7   8   -0.24    0.96
   7  -7  -8    1.25    1.03
  -7  -7   8    0.08    0.53
  -7   7   8    0.16    0.87
  -7   7   8    0.02    0.72
   7   7  -8    0.20    0.76
   6  -7  -8   14.27    1.65
  -6  -7   8   14.76    1.00
  -6   7   8   17.28    1.44
  -6   7   8   15.79    1.34
   6   7  -8   14.64    1.42
  -5  -7   8   16.37    1.03
  -5  -7   8   15.40    1.43
   5  -7  -8   15.18    1.39
  -5   7   8   15.45    1.24
   5   7  -8   14.13    1.19
  -5   7   8   12.35    1.09
   4  -7  -8    3.28    0.75
  -4  -7   8    3.05    0.56
   4   7  -8    3.11    0.83
  -4   7   8    3.83    0.61
   4   7  -8    4.17    0.66
  -4   7   8    2.15    0.61
   3  -7  -8    0.18    0.40
  -3  -7   8    0.45    0.45
  -3  -7   8    0.58    0.38
  -3   7   8    0.12    0.37
   3   7  -8    0.82    0.36
   3   7  -8    0.65    0.44
  -3   7   8    0.14    0.30
   2  -7  -8    3.66    0.64
  -2  -7   8    4.27    0.63
  -2  -7   8    3.17    0.42
   2  -7  -8    4.23    0.50
   2   7  -8    3.00    0.63
  -2   7   8    3.61    0.71
  -2   7   8    4.36    0.48
   2   7  -8    4.30    0.45
  -1  -7   8    2.77    0.51
   1  -7  -8    2.35    0.53
   1  -7  -8    3.00    0.42
   1   7  -8    2.79    0.56
  -1   7   8    3.83    0.42
  -1   7   8    3.01    0.57
   0  -7   8    7.52    0.72
   0  -7  -8    7.33    0.72
   0  -7  -8    7.44    0.61
   0   7   8    6.66    0.57
   0   7  -8    8.24    0.79
   0   7   8    7.20    0.86
  -1  -7  -8    0.02    0.29
   1  -7   8    1.03    0.41
  -1  -7  -8    0.78    0.38
  -1  -7  -8   -0.17    0.35
  -1   7  -8    0.25    0.37
   1   7   8    0.97    0.44
  -2  -7  -8    2.81    0.53
  -2  -7  -8    3.28    0.71
   2  -7   8    2.65    0.36
   2  -7   8    3.11    0.72
   2   7   8    2.04    0.46
  -2   7  -8    3.52    0.38
  -2   7  -8    2.57    0.63
   3  -7   8    4.27    0.58
   3  -7   8    3.99    0.66
  -3  -7  -8    4.98    0.78
  -3   7  -8    4.11    0.78
   3   7   8    4.32    0.65
  -3   7  -8    4.30    0.62
   3   7   8    5.56    0.86
  -4  -7  -8    4.92    0.91
   4  -7   8    6.07    0.82
   4  -7   8    4.55    0.74
  -4   7  -8    5.81    0.97
   4   7   8    5.68    0.94
   5  -7   8    0.91    0.48
   5  -7   8    1.49    0.63
  -5  -7  -8    0.38    0.63
  -5  -7  -8    1.21    0.49
   5   7   8    1.57    0.65
  -5   7  -8    0.70    0.69
  -6  -7  -8    1.14    1.09
   6  -7   8   -0.10    0.55
   6  -7   8    0.26    0.76
  -6   7  -8    0.33    0.79
   6   7   8   -0.69    0.69
   7  -7   8   16.34    1.39
  -7  -7  -8   16.79    1.95
  -7   7  -8   16.06    1.97
   7   7   8   14.30    1.82
   8  -7   8    3.60    1.30
   8   7   8    4.36    1.49
  -8   7  -8    4.70    1.62
   8  -8  -8    0.46    1.17
   8  -8  -8    0.82    1.09
  -8   8   8   -0.39    1.20
   8   8  -8    0.22    1.24
   7  -8  -8    1.73    1.12
  -7  -8   8    0.39    0.97
  -7  -8   8    1.57    0.65
  -7   8   8    3.37    1.05
   6  -8  -8    3.79    1.10
  -6  -8   8    6.80    1.25
  -6   8   8    2.75    0.79
  -6   8   8    3.80    0.88
   6   8  -8    5.75    1.08
   5  -8  -8   13.19    1.53
  -5  -8   8   14.11    1.04
  -5  -8   8   10.31    1.41
   5   8  -8   13.86    1.20
  -5   8   8   12.77    1.38
  -5   8   8   14.43    1.24
  -4  -8   8    0.97    0.47
   4  -8  -8   -0.21    0.57
  -4   8   8    1.15    0.51
  -4   8   8    1.06    0.50
   4   8  -8    1.83    0.73
   4   8  -8    0.66    0.50
   3  -8  -8    6.58    0.75
  -3  -8   8    6.39    0.74
  -3  -8   8    6.83    0.85
   3  -8  -8    5.67    0.82
  -3   8   8    7.65    0.98
   3   8  -8    5.92    0.67
  -3   8   8    6.48    0.70
   3   8  -8    7.83    1.00
   2  -8  -8    0.00    0.38
  -2  -8   8    0.63    0.31
   2  -8  -8    0.88    0.44
  -2  -8   8    0.74    0.42
  -2   8   8    0.80    0.44
   2   8  -8    0.52    0.27
   2   8  -8    0.84    0.50
  -2   8   8    0.20    0.32
   1  -8  -8   -0.20    0.33
  -1  -8   8   -0.52    0.28
   1  -8  -8    0.19    0.39
  -1   8   8    0.11    0.28
  -1   8   8   -0.45    0.37
   1   8  -8    0.41    0.38
   0  -8  -8    5.70    0.76
   0  -8  -8    6.18    0.66
   0  -8   8    6.04    0.81
   0   8  -8    4.80    0.80
   0   8   8    5.71    0.63
   0   8   8    5.93    0.81
   1  -8   8    2.79    0.59
  -1  -8  -8    2.44    0.62
  -1   8  -8    2.91    0.68
   1   8   8    1.50    0.49
  -2  -8  -8    7.47    1.02
   2  -8   8    6.35    0.80
  -2  -8  -8    6.59    0.83
   2  -8   8    4.94    0.43
   2   8   8    5.42    0.75
  -2   8  -8    5.71    0.45
  -2   8  -8    4.98    0.81
  -3  -8  -8    0.46    0.53
   3  -8   8   -0.15    0.35
   3  -8   8    0.57    0.50
  -3   8  -8   -0.27    0.46
   3   8   8    0.18    0.48
  -3   8  -8   -0.05    0.43
   3   8   8   -0.04    0.44
   4  -8   8    0.89    0.51
  -4  -8  -8    1.04    0.66
   4  -8   8    1.82    0.56
  -4  -8  -8    1.56    0.56
   4   8   8    1.39    0.62
  -4   8  -8    0.36    0.59
  -5  -8  -8   -0.02    0.77
   5  -8   8   -0.37    0.59
   5  -8   8    0.50    0.67
  -5  -8  -8   -0.41    0.54
   5   8   8    0.37    0.67
  -5   8  -8    0.80    0.72
   6  -8   8    1.46    0.83
  -6  -8  -8    1.10    0.96
   6  -8   8    2.37    0.81
  -6  -8  -8    2.08    0.56
  -6   8  -8    2.20    0.92
   6   8   8    0.19    0.78
   7  -8   8    1.37    1.29
  -7  -8  -8    3.29    1.08
   7  -8   8    0.06    0.87
   7   8   8    2.00    1.21
  -7   8  -8    0.54    1.10
   8  -8   8    7.48    1.59
  -8  -8  -8    6.06    1.70
   8   8   8    2.49    1.51
  -8   8  -8    6.50    1.69
  -8  -9   8    1.38    1.60
   8  -9  -8    6.35    1.60
   8  -9  -8    6.55    1.39
  -8   9   8    5.70    1.59
   8   9  -8    3.82    1.50
  -7  -9   8    4.81    1.39
  -7  -9   8    2.61    0.75
   7  -9  -8    2.66    1.23
   7   9  -8    4.19    1.19
  -7   9   8    5.37    1.16
  -6  -9   8    0.40    0.86
   6  -9  -8    0.95    0.99
  -6  -9   8    0.59    0.63
  -6   9   8    1.27    0.86
   6   9  -8    0.98    0.86
  -6   9   8    0.85    0.77
  -5  -9   8   -0.24    0.81
   5  -9  -8    0.60    0.67
  -5  -9   8   -0.11    0.55
  -5   9   8    0.12    0.66
  -5   9   8    0.39    0.65
   5   9  -8    0.28    0.64
  -4  -9   8   -0.03    0.46
   4  -9  -8    0.90    0.64
   4   9  -8    1.54    0.59
  -4   9   8    0.48    0.53
  -4   9   8    0.21    0.58
   4   9  -8    1.45    0.75
  -3  -9   8   16.38    1.24
  -3  -9   8   17.96    1.16
   3  -9  -8   18.77    1.37
  -3   9   8   16.54    1.06
   3   9  -8   17.84    1.42
   3   9  -8   16.65    1.02
  -3   9   8   17.05    1.32
  -2  -9   8    7.12    0.54
   2  -9  -8    7.24    0.95
  -2  -9   8    7.16    0.61
  -2  -9   8    9.70    1.08
   2   9  -8    9.14    1.12
  -2   9   8    6.75    0.72
  -2   9   8    5.78    0.93
   1  -9  -8    2.29    0.77
[truncated: 633,740 more chars]
