# Supplementary material for: Virtual Screening, Structural Analysis, and Formation Thermodynamics of Carbamazepine Cocrystals
Source: Pharmaceutics. 2023 Mar 3;15(3):836. doi: 10.3390/pharmaceutics15030836 (PMC10052035; doi:10.3390/pharmaceutics15030836)
Supplement: Supplementary file 1 [file pharmaceutics-15-00836-s001.zip › [CBZ+4AcAmBA].cif]

 
data_[CBZ+4AcAmBA]
 
_audit_creation_method            'SHELXL-2018/3'
_shelx_SHELXL_version_number      '2018/3'
_chemical_name_systematic         ?
_chemical_name_common             ?
_chemical_melting_point           ?
_chemical_formula_moiety          'C15 H12 N2 O, C9 H9 N O3'
_chemical_formula_sum
 'C24 H21 N3 O4' 
_chemical_formula_weight          415.44

loop_
 _atom_type_symbol
 _atom_type_description
 _atom_type_scat_dispersion_real
 _atom_type_scat_dispersion_imag
 _atom_type_scat_source
 'C'  'C'   0.0033   0.0016
 'International Tables Vol C Tables 4.2.6.8 and 6.1.1.4'
 'H'  'H'   0.0000   0.0000
 'International Tables Vol C Tables 4.2.6.8 and 6.1.1.4'
 'N'  'N'   0.0061   0.0033
 'International Tables Vol C Tables 4.2.6.8 and 6.1.1.4'
 'O'  'O'   0.0106   0.0060
 'International Tables Vol C Tables 4.2.6.8 and 6.1.1.4'
 
_space_group_crystal_system       monoclinic
_space_group_IT_number            14
_space_group_name_H-M_alt         'P 21/c'
_space_group_name_Hall            '-P 2ybc'
 
_shelx_space_group_comment
;
The symmetry employed for this shelxl refinement is uniquely defined
by the following loop, which should always be used as a source of
symmetry information in preference to the above space-group names.
They are only intended as comments.
;
 
loop_
 _space_group_symop_operation_xyz
 'x, y, z'
 '-x, y+1/2, -z+1/2'
 '-x, -y, -z'
 'x, -y-1/2, z-1/2'
 
_cell_length_a                    6.7920(2)
_cell_length_b                    24.9978(8)
_cell_length_c                    12.1120(4)
_cell_angle_alpha                 90
_cell_angle_beta                  94.9744(12)
_cell_angle_gamma                 90
_cell_volume                      2048.69(11)
_cell_formula_units_Z             4
_cell_measurement_temperature     150(2)
_cell_measurement_reflns_used     9967
_cell_measurement_theta_min       2.971
_cell_measurement_theta_max       30.526
 
_exptl_crystal_description        prism
_exptl_crystal_colour             colourless
_exptl_crystal_density_meas       ?
_exptl_crystal_density_method     ?
_exptl_crystal_density_diffrn     1.347          
_exptl_crystal_F_000              872
_exptl_transmission_factor_min    ?
_exptl_transmission_factor_max    ?
_exptl_crystal_size_max           0.250
_exptl_crystal_size_mid           0.250
_exptl_crystal_size_min           0.200
_exptl_absorpt_coefficient_mu     0.093
_shelx_estimated_absorpt_T_min    0.977
_shelx_estimated_absorpt_T_max    0.982
_exptl_absorpt_correction_type    multi-scan
_exptl_absorpt_correction_T_min   0.8829
_exptl_absorpt_correction_T_max   0.9281
_exptl_absorpt_process_details    'SADABS (Bruker, 2016)'
_exptl_absorpt_special_details    ?
_diffrn_ambient_temperature       150(2)
_diffrn_radiation_wavelength      0.71073
_diffrn_radiation_type            MoK\a
_diffrn_source                    ?
_diffrn_measurement_device_type   'Bruker D8 Venture'
_diffrn_measurement_method        \w
_diffrn_detector_area_resol_mean  ?
_diffrn_reflns_number             29190
_diffrn_reflns_av_unetI/netI      0.0193
_diffrn_reflns_av_R_equivalents   0.0293
_diffrn_reflns_limit_h_min        -8
_diffrn_reflns_limit_h_max        8
_diffrn_reflns_limit_k_min        -33
_diffrn_reflns_limit_k_max        33
_diffrn_reflns_limit_l_min        -15
_diffrn_reflns_limit_l_max        15
_diffrn_reflns_theta_min          1.874
_diffrn_reflns_theta_max          27.999
_diffrn_reflns_theta_full         25.242
_diffrn_measured_fraction_theta_max   1.000
_diffrn_measured_fraction_theta_full  0.999
_diffrn_reflns_Laue_measured_fraction_max    1.000
_diffrn_reflns_Laue_measured_fraction_full   0.999
_diffrn_reflns_point_group_measured_fraction_max   1.000
_diffrn_reflns_point_group_measured_fraction_full  0.999
_reflns_number_total              4922
_reflns_number_gt                 4316
_reflns_threshold_expression      'I > 2\s(I)'
_reflns_Friedel_coverage          0.000
_reflns_Friedel_fraction_max      .
_reflns_Friedel_fraction_full     .
 
_reflns_special_details
;
 Reflections were merged by SHELXL according to the crystal
 class for the calculation of statistics and refinement.
 
 _reflns_Friedel_fraction is defined as the number of unique
 Friedel pairs measured divided by the number that would be
 possible theoretically, ignoring centric projections and
 systematic absences.
;
 
_computing_data_collection        '<i>APEX3</i> (Bruker, 2018)'
_computing_cell_refinement        'SAINT (Bruker, 2018)'
_computing_data_reduction         'SAINT (Bruker, 2018)'
_computing_structure_solution     'SHELXT (Sheldrick, 2016)'
_computing_structure_refinement 'SHELXL-2018/3 (Sheldrick, 2018)'
_computing_molecular_graphics     ?
_computing_publication_material   ?
_refine_special_details           ?
_refine_ls_structure_factor_coef  Fsqd
_refine_ls_matrix_type            full
_refine_ls_weighting_scheme       calc
_refine_ls_weighting_details
'w=1/[\s^2^(Fo^2^)+(0.0461P)^2^+0.8097P] where P=(Fo^2^+2Fc^2^)/3'
_atom_sites_solution_primary      direct
_atom_sites_solution_secondary    difmap
_atom_sites_solution_hydrogens    difmap
_refine_ls_hydrogen_treatment     refall
_refine_ls_extinction_method      'SHELXL-2018/3 (Sheldrick 2018)'
_refine_ls_extinction_coef        0.0036(9)
_refine_ls_extinction_expression
 'Fc^*^=kFc[1+0.001xFc^2^\l^3^/sin(2\q)]^-1/4^'
_refine_ls_number_reflns          4922
_refine_ls_number_parameters      365
_refine_ls_number_restraints      0
_refine_ls_R_factor_all           0.0454
_refine_ls_R_factor_gt            0.0389
_refine_ls_wR_factor_ref          0.1015
_refine_ls_wR_factor_gt           0.0973
_refine_ls_goodness_of_fit_ref    1.042
_refine_ls_restrained_S_all       1.042
_refine_ls_shift/su_max           0.001
_refine_ls_shift/su_mean          0.000
 
loop_
 _atom_site_label
 _atom_site_type_symbol
 _atom_site_fract_x
 _atom_site_fract_y
 _atom_site_fract_z
 _atom_site_U_iso_or_equiv
 _atom_site_adp_type
 _atom_site_occupancy
 _atom_site_site_symmetry_order  
 _atom_site_calc_flag
 _atom_site_refinement_flags_posn
 _atom_site_refinement_flags_adp
 _atom_site_refinement_flags_occupancy
 _atom_site_disorder_assembly
 _atom_site_disorder_group
O1 O 0.84204(14) 0.23694(4) 0.54915(8) 0.0312(2) Uani 1 1 d . . . . .
H1 H 0.904(3) 0.2133(9) 0.5036(18) 0.063(6) Uiso 1 1 d . . . . .
O2 O 0.60014(15) 0.17597(4) 0.54476(8) 0.0327(2) Uani 1 1 d . . . . .
O3 O 0.04515(16) 0.31080(4) 0.90520(9) 0.0356(3) Uani 1 1 d . . . . .
N1 N 0.25378(15) 0.36692(4) 0.82644(8) 0.0200(2) Uani 1 1 d . . . . .
H10 H 0.300(2) 0.4003(7) 0.8277(13) 0.032(4) Uiso 1 1 d . . . . .
C1 C 0.66539(19) 0.21956(5) 0.57212(10) 0.0238(3) Uani 1 1 d . . . . .
C2 C 0.55749(18) 0.25931(5) 0.63588(10) 0.0211(2) Uani 1 1 d . . . . .
C3 C 0.65093(18) 0.30437(5) 0.68343(11) 0.0245(3) Uani 1 1 d . . . . .
C4 C 0.54921(18) 0.33877(5) 0.74791(11) 0.0239(3) Uani 1 1 d . . . . .
C5 C 0.35223(17) 0.32924(4) 0.76382(9) 0.0189(2) Uani 1 1 d . . . . .
C6 C 0.25609(19) 0.28512(5) 0.71347(11) 0.0245(3) Uani 1 1 d . . . . .
C7 C 0.35973(19) 0.25042(5) 0.65054(11) 0.0249(3) Uani 1 1 d . . . . .
C8 C 0.10888(18) 0.35631(5) 0.89247(10) 0.0217(2) Uani 1 1 d . . . . .
C9 C 0.0277(2) 0.40349(6) 0.94998(12) 0.0303(3) Uani 1 1 d . . . . .
H3 H 0.790(3) 0.3108(7) 0.6736(14) 0.037(4) Uiso 1 1 d . . . . .
H4 H 0.613(2) 0.3697(7) 0.7847(14) 0.034(4) Uiso 1 1 d . . . . .
H6 H 0.116(2) 0.2796(6) 0.7200(14) 0.035(4) Uiso 1 1 d . . . . .
H7 H 0.294(2) 0.2198(7) 0.6153(14) 0.034(4) Uiso 1 1 d . . . . .
H91 H -0.098(5) 0.4124(13) 0.910(3) 0.124(11) Uiso 1 1 d . . . . .
H92 H 0.110(4) 0.4350(11) 0.957(2) 0.087(8) Uiso 1 1 d . . . . .
H93 H -0.013(4) 0.3936(10) 1.020(2) 0.083(8) Uiso 1 1 d . . . . .
O11 O 0.41779(12) 0.47156(3) 0.86623(7) 0.02043(18) Uani 1 1 d . . . . .
N11 N 0.43188(16) 0.55938(4) 0.91137(9) 0.0213(2) Uani 1 1 d . . . . .
H11 H 0.485(2) 0.5501(6) 0.9785(14) 0.031(4) Uiso 1 1 d . . . . .
H12 H 0.399(2) 0.5930(7) 0.8967(13) 0.029(4) Uiso 1 1 d . . . . .
N12 N 0.28658(14) 0.53189(4) 0.74013(8) 0.0175(2) Uani 1 1 d . . . . .
C10 C 0.37938(15) 0.51911(4) 0.84197(9) 0.0160(2) Uani 1 1 d . . . . .
C11 C 0.22164(17) 0.58525(4) 0.71357(9) 0.0190(2) Uani 1 1 d . . . . .
C12 C 0.02828(18) 0.60018(5) 0.73071(10) 0.0218(2) Uani 1 1 d . . . . .
C13 C -0.0245(2) 0.65392(5) 0.71151(11) 0.0290(3) Uani 1 1 d . . . . .
C14 C 0.1072(2) 0.68990(5) 0.67289(11) 0.0323(3) Uani 1 1 d . . . . .
C15 C 0.2963(2) 0.67391(5) 0.65317(11) 0.0303(3) Uani 1 1 d . . . . .
C16 C 0.35413(19) 0.62133(5) 0.67375(10) 0.0244(3) Uani 1 1 d . . . . .
C17 C -0.11915(19) 0.56222(5) 0.76438(11) 0.0259(3) Uani 1 1 d . . . . .
C21 C 0.19874(17) 0.48966(4) 0.67245(9) 0.0182(2) Uani 1 1 d . . . . .
C22 C -0.00148(18) 0.47783(5) 0.67775(10) 0.0211(2) Uani 1 1 d . . . . .
C23 C -0.0778(2) 0.43299(5) 0.61863(11) 0.0270(3) Uani 1 1 d . . . . .
C24 C 0.0384(2) 0.40253(5) 0.55549(11) 0.0299(3) Uani 1 1 d . . . . .
C25 C 0.2349(2) 0.41628(5) 0.54797(11) 0.0290(3) Uani 1 1 d . . . . .
C26 C 0.31498(19) 0.46003(5) 0.60608(10) 0.0233(2) Uani 1 1 d . . . . .
C27 C -0.13197(18) 0.50978(5) 0.74158(11) 0.0255(3) Uani 1 1 d . . . . .
H13 H -0.157(3) 0.6648(7) 0.7270(14) 0.036(4) Uiso 1 1 d . . . . .
H14 H 0.065(3) 0.7260(7) 0.6604(14) 0.041(5) Uiso 1 1 d . . . . .
H15 H 0.390(2) 0.6993(7) 0.6260(14) 0.038(4) Uiso 1 1 d . . . . .
H16 H 0.490(3) 0.6087(6) 0.6614(14) 0.034(4) Uiso 1 1 d . . . . .
H17 H -0.226(2) 0.5779(6) 0.8021(13) 0.033(4) Uiso 1 1 d . . . . .
H23 H -0.217(3) 0.4236(7) 0.6235(14) 0.036(4) Uiso 1 1 d . . . . .
H24 H -0.017(3) 0.3712(7) 0.5159(14) 0.039(4) Uiso 1 1 d . . . . .
H25 H 0.318(3) 0.3948(7) 0.5042(15) 0.040(5) Uiso 1 1 d . . . . .
H26 H 0.453(2) 0.4707(6) 0.6045(13) 0.027(4) Uiso 1 1 d . . . . .
H27 H -0.247(3) 0.4912(7) 0.7649(14) 0.038(4) Uiso 1 1 d . . . . .
 
loop_
 _atom_site_aniso_label
 _atom_site_aniso_U_11
 _atom_site_aniso_U_22
 _atom_site_aniso_U_33
 _atom_site_aniso_U_23
 _atom_site_aniso_U_13
 _atom_site_aniso_U_12
O1 0.0328(5) 0.0256(5) 0.0379(6) -0.0012(4) 0.0183(4) 0.0049(4)
O2 0.0431(6) 0.0203(4) 0.0360(5) -0.0046(4) 0.0112(4) 0.0020(4)
O3 0.0444(6) 0.0251(5) 0.0411(6) -0.0063(4) 0.0252(5) -0.0135(4)
N1 0.0231(5) 0.0147(4) 0.0231(5) -0.0017(4) 0.0076(4) -0.0018(4)
C1 0.0317(6) 0.0188(5) 0.0219(6) 0.0036(4) 0.0076(5) 0.0056(5)
C2 0.0259(6) 0.0173(5) 0.0208(6) 0.0026(4) 0.0062(4) 0.0028(4)
C3 0.0208(6) 0.0216(6) 0.0321(7) -0.0013(5) 0.0073(5) 0.0001(5)
C4 0.0228(6) 0.0186(5) 0.0307(6) -0.0044(5) 0.0048(5) -0.0034(4)
C5 0.0226(6) 0.0150(5) 0.0196(5) 0.0005(4) 0.0052(4) 0.0005(4)
C6 0.0214(6) 0.0226(6) 0.0302(6) -0.0042(5) 0.0074(5) -0.0040(5)
C7 0.0282(6) 0.0192(6) 0.0279(6) -0.0048(5) 0.0059(5) -0.0044(5)
C8 0.0237(6) 0.0217(5) 0.0204(6) -0.0024(4) 0.0054(4) -0.0032(4)
C9 0.0349(7) 0.0280(7) 0.0302(7) -0.0077(5) 0.0152(6) -0.0021(6)
O11 0.0261(4) 0.0142(4) 0.0201(4) 0.0012(3) -0.0028(3) 0.0001(3)
N11 0.0293(5) 0.0148(5) 0.0187(5) 0.0006(4) -0.0045(4) 0.0011(4)
N12 0.0194(5) 0.0145(4) 0.0180(5) 0.0003(3) -0.0020(4) 0.0009(3)
C10 0.0140(5) 0.0169(5) 0.0174(5) 0.0015(4) 0.0022(4) -0.0006(4)
C11 0.0246(6) 0.0162(5) 0.0153(5) -0.0004(4) -0.0032(4) 0.0025(4)
C12 0.0264(6) 0.0211(5) 0.0174(5) -0.0026(4) -0.0015(4) 0.0049(5)
C13 0.0371(7) 0.0246(6) 0.0242(6) -0.0044(5) -0.0035(5) 0.0123(5)
C14 0.0534(9) 0.0174(6) 0.0245(6) -0.0010(5) -0.0061(6) 0.0079(6)
C15 0.0453(8) 0.0208(6) 0.0235(6) 0.0039(5) -0.0045(6) -0.0042(6)
C16 0.0287(6) 0.0221(6) 0.0215(6) 0.0022(4) -0.0033(5) -0.0017(5)
C17 0.0223(6) 0.0322(7) 0.0233(6) -0.0021(5) 0.0029(5) 0.0070(5)
C21 0.0218(5) 0.0169(5) 0.0151(5) 0.0013(4) -0.0021(4) 0.0012(4)
C22 0.0225(6) 0.0212(6) 0.0192(5) 0.0017(4) -0.0012(4) 0.0002(4)
C23 0.0261(6) 0.0258(6) 0.0279(6) 0.0000(5) -0.0056(5) -0.0045(5)
C24 0.0412(8) 0.0237(6) 0.0230(6) -0.0050(5) -0.0076(5) -0.0020(5)
C25 0.0392(7) 0.0275(6) 0.0202(6) -0.0049(5) 0.0012(5) 0.0071(6)
C26 0.0247(6) 0.0254(6) 0.0196(6) -0.0005(4) 0.0015(4) 0.0044(5)
C27 0.0192(6) 0.0316(6) 0.0258(6) 0.0003(5) 0.0029(5) -0.0006(5)
 
_geom_special_details
;
 All esds (except the esd in the dihedral angle between two l.s. planes)
 are estimated using the full covariance matrix.  The cell esds are taken
 into account individually in the estimation of esds in distances, angles
 and torsion angles; correlations between esds in cell parameters are only
 used when they are defined by crystal symmetry.  An approximate (isotropic)
 treatment of cell esds is used for estimating esds involving l.s. planes.
;
 
loop_
 _geom_bond_atom_site_label_1
 _geom_bond_atom_site_label_2
 _geom_bond_distance
 _geom_bond_site_symmetry_2
 _geom_bond_publ_flag
O1 C1 1.3280(16) . ?
O1 H1 0.93(2) . ?
O2 C1 1.2117(16) . ?
O3 C8 1.2316(15) . ?
N1 C8 1.3473(15) . ?
N1 C5 1.4132(14) . ?
N1 H10 0.892(17) . ?
C1 C2 1.4897(16) . ?
C2 C7 1.3880(17) . ?
C2 C3 1.3927(17) . ?
C3 C4 1.3858(17) . ?
C3 H3 0.976(17) . ?
C4 C5 1.3887(16) . ?
C4 H4 0.976(17) . ?
C5 C6 1.3950(16) . ?
C6 C7 1.3863(17) . ?
C6 H6 0.972(17) . ?
C7 H7 0.967(17) . ?
C8 C9 1.4990(17) . ?
C9 H91 0.96(3) . ?
C9 H92 0.97(3) . ?
C9 H93 0.94(3) . ?
O11 C10 1.2465(13) . ?
N11 C10 1.3399(14) . ?
N11 H11 0.890(17) . ?
N11 H12 0.883(16) . ?
N12 C10 1.3734(14) . ?
N12 C11 1.4327(14) . ?
N12 C21 1.4345(14) . ?
C11 C16 1.3896(17) . ?
C11 C12 1.3979(17) . ?
C12 C13 1.4046(17) . ?
C12 C17 1.4629(18) . ?
C13 C14 1.379(2) . ?
C13 H13 0.977(17) . ?
C14 C15 1.386(2) . ?
C14 H14 0.954(18) . ?
C15 C16 1.3882(17) . ?
C15 H15 0.977(18) . ?
C16 H16 0.997(17) . ?
C17 C27 1.3409(19) . ?
C17 H17 0.971(16) . ?
C21 C26 1.3886(16) . ?
C21 C22 1.3986(16) . ?
C22 C23 1.4049(17) . ?
C22 C27 1.4628(17) . ?
C23 C24 1.376(2) . ?
C23 H23 0.980(17) . ?
C24 C25 1.389(2) . ?
C24 H24 0.977(17) . ?
C25 C26 1.3859(18) . ?
C25 H25 0.968(18) . ?
C26 H26 0.978(16) . ?
C27 H27 0.971(18) . ?
 
loop_
 _geom_angle_atom_site_label_1
 _geom_angle_atom_site_label_2
 _geom_angle_atom_site_label_3
 _geom_angle
 _geom_angle_site_symmetry_1
 _geom_angle_site_symmetry_3
 _geom_angle_publ_flag
C1 O1 H1 112.1(13) . . ?
C8 N1 C5 126.26(10) . . ?
C8 N1 H10 116.6(10) . . ?
C5 N1 H10 116.8(11) . . ?
O2 C1 O1 123.54(11) . . ?
O2 C1 C2 123.85(12) . . ?
O1 C1 C2 112.60(11) . . ?
C7 C2 C3 119.21(11) . . ?
C7 C2 C1 118.98(11) . . ?
C3 C2 C1 121.80(11) . . ?
C4 C3 C2 120.22(11) . . ?
C4 C3 H3 120.2(10) . . ?
C2 C3 H3 119.6(10) . . ?
C3 C4 C5 120.34(11) . . ?
C3 C4 H4 121.7(10) . . ?
C5 C4 H4 118.0(10) . . ?
C4 C5 C6 119.67(11) . . ?
C4 C5 N1 117.81(10) . . ?
C6 C5 N1 122.43(11) . . ?
C7 C6 C5 119.63(11) . . ?
C7 C6 H6 120.2(10) . . ?
C5 C6 H6 120.1(10) . . ?
C6 C7 C2 120.88(11) . . ?
C6 C7 H7 120.0(10) . . ?
C2 C7 H7 119.1(10) . . ?
O3 C8 N1 122.61(11) . . ?
O3 C8 C9 121.42(11) . . ?
N1 C8 C9 115.97(11) . . ?
C8 C9 H91 107.1(19) . . ?
C8 C9 H92 116.4(15) . . ?
H91 C9 H92 110(2) . . ?
C8 C9 H93 111.0(15) . . ?
H91 C9 H93 101(2) . . ?
H92 C9 H93 111(2) . . ?
C10 N11 H11 116.2(10) . . ?
C10 N11 H12 122.6(10) . . ?
H11 N11 H12 120.4(15) . . ?
C10 N12 C11 121.78(9) . . ?
C10 N12 C21 118.53(9) . . ?
C11 N12 C21 116.89(9) . . ?
O11 C10 N11 121.99(10) . . ?
O11 C10 N12 120.26(10) . . ?
N11 C10 N12 117.71(10) . . ?
C16 C11 C12 121.56(11) . . ?
C16 C11 N12 119.09(11) . . ?
C12 C11 N12 119.34(10) . . ?
C11 C12 C13 117.39(12) . . ?
C11 C12 C17 122.88(11) . . ?
C13 C12 C17 119.71(12) . . ?
C14 C13 C12 121.11(13) . . ?
C14 C13 H13 121.4(10) . . ?
C12 C13 H13 117.5(10) . . ?
C13 C14 C15 120.56(12) . . ?
C13 C14 H14 118.4(11) . . ?
C15 C14 H14 121.0(11) . . ?
C14 C15 C16 119.63(13) . . ?
C14 C15 H15 120.8(10) . . ?
C16 C15 H15 119.6(10) . . ?
C15 C16 C11 119.68(13) . . ?
C15 C16 H16 121.6(10) . . ?
C11 C16 H16 118.7(9) . . ?
C27 C17 C12 127.62(12) . . ?
C27 C17 H17 117.0(10) . . ?
C12 C17 H17 115.2(9) . . ?
C26 C21 C22 121.18(11) . . ?
C26 C21 N12 119.62(10) . . ?
C22 C21 N12 119.16(10) . . ?
C21 C22 C23 117.56(11) . . ?
C21 C22 C27 123.02(11) . . ?
C23 C22 C27 119.42(11) . . ?
C24 C23 C22 121.37(12) . . ?
C24 C23 H23 120.2(10) . . ?
C22 C23 H23 118.4(10) . . ?
C23 C24 C25 120.04(12) . . ?
C23 C24 H24 120.0(10) . . ?
C25 C24 H24 120.0(10) . . ?
C26 C25 C24 119.94(12) . . ?
C26 C25 H25 119.6(11) . . ?
C24 C25 H25 120.4(10) . . ?
C25 C26 C21 119.81(12) . . ?
C25 C26 H26 122.7(9) . . ?
C21 C26 H26 117.5(9) . . ?
C17 C27 C22 127.67(12) . . ?
C17 C27 H27 116.6(10) . . ?
C22 C27 H27 115.5(10) . . ?
 
loop_
 _geom_torsion_atom_site_label_1
 _geom_torsion_atom_site_label_2
 _geom_torsion_atom_site_label_3
 _geom_torsion_atom_site_label_4
 _geom_torsion
 _geom_torsion_site_symmetry_1
 _geom_torsion_site_symmetry_2
 _geom_torsion_site_symmetry_3
 _geom_torsion_site_symmetry_4
 _geom_torsion_publ_flag
O2 C1 C2 C7 -10.65(19) . . . . ?
O1 C1 C2 C7 169.83(11) . . . . ?
O2 C1 C2 C3 167.70(13) . . . . ?
O1 C1 C2 C3 -11.82(17) . . . . ?
C7 C2 C3 C4 2.33(19) . . . . ?
C1 C2 C3 C4 -176.02(11) . . . . ?
C2 C3 C4 C5 -1.3(2) . . . . ?
C3 C4 C5 C6 -0.74(19) . . . . ?
C3 C4 C5 N1 -177.35(11) . . . . ?
C8 N1 C5 C4 -147.63(12) . . . . ?
C8 N1 C5 C6 35.86(18) . . . . ?
C4 C5 C6 C7 1.76(19) . . . . ?
N1 C5 C6 C7 178.21(11) . . . . ?
C5 C6 C7 C2 -0.7(2) . . . . ?
C3 C2 C7 C6 -1.30(19) . . . . ?
C1 C2 C7 C6 177.09(12) . . . . ?
C5 N1 C8 O3 -0.1(2) . . . . ?
C5 N1 C8 C9 -179.82(12) . . . . ?
C11 N12 C10 O11 173.36(10) . . . . ?
C21 N12 C10 O11 12.88(16) . . . . ?
C11 N12 C10 N11 -8.83(16) . . . . ?
C21 N12 C10 N11 -169.31(10) . . . . ?
C10 N12 C11 C16 85.84(14) . . . . ?
C21 N12 C11 C16 -113.37(12) . . . . ?
C10 N12 C11 C12 -92.68(13) . . . . ?
C21 N12 C11 C12 68.11(14) . . . . ?
C16 C11 C12 C13 -3.18(17) . . . . ?
N12 C11 C12 C13 175.30(10) . . . . ?
C16 C11 C12 C17 175.18(11) . . . . ?
N12 C11 C12 C17 -6.34(17) . . . . ?
C11 C12 C13 C14 2.61(18) . . . . ?
C17 C12 C13 C14 -175.81(12) . . . . ?
C12 C13 C14 C15 -0.7(2) . . . . ?
C13 C14 C15 C16 -0.8(2) . . . . ?
C14 C15 C16 C11 0.21(19) . . . . ?
C12 C11 C16 C15 1.83(18) . . . . ?
N12 C11 C16 C15 -176.66(11) . . . . ?
C11 C12 C17 C27 -29.7(2) . . . . ?
C13 C12 C17 C27 148.62(14) . . . . ?
C10 N12 C21 C26 -84.00(13) . . . . ?
C11 N12 C21 C26 114.57(12) . . . . ?
C10 N12 C21 C22 93.68(13) . . . . ?
C11 N12 C21 C22 -67.75(14) . . . . ?
C26 C21 C22 C23 3.66(17) . . . . ?
N12 C21 C22 C23 -173.98(10) . . . . ?
C26 C21 C22 C27 -176.45(11) . . . . ?
N12 C21 C22 C27 5.91(17) . . . . ?
C21 C22 C23 C24 -1.60(18) . . . . ?
C27 C22 C23 C24 178.50(12) . . . . ?
C22 C23 C24 C25 -0.9(2) . . . . ?
C23 C24 C25 C26 1.4(2) . . . . ?
C24 C25 C26 C21 0.61(19) . . . . ?
C22 C21 C26 C25 -3.21(18) . . . . ?
N12 C21 C26 C25 174.42(11) . . . . ?
C12 C17 C27 C22 0.1(2) . . . . ?
C21 C22 C27 C17 29.7(2) . . . . ?
C23 C22 C27 C17 -150.36(13) . . . . ?
 
loop_
 _geom_hbond_atom_site_label_D 
 _geom_hbond_atom_site_label_H 
 _geom_hbond_atom_site_label_A 
 _geom_hbond_distance_DH 
 _geom_hbond_distance_HA 
 _geom_hbond_distance_DA 
 _geom_hbond_angle_DHA 
 _geom_hbond_site_symmetry_A 
 _geom_hbond_publ_flag
N1 H10 O11  0.892(17) 1.991(17) 2.8676(13) 167.3(15) . yes
O1 H1 O3  0.93(2) 1.70(2) 2.6046(13) 161(2) 4_665 yes
N11 H11 O11  0.890(17) 2.014(17) 2.9017(13) 175.5(15) 3_667 yes
N11 H12 O2  0.883(16) 2.193(16) 2.9737(14) 147.2(14) 2_656 yes
 
_refine_diff_density_max    0.348
_refine_diff_density_min   -0.170
_refine_diff_density_rms    0.040

_shelx_res_file
;
TITL a in P2(1)/c
    a.res
    created by SHELXL-2018/3 at 16:31:43 on 01-Aug-2022
CELL  0.71073   6.7920  24.9978  12.1120   90.000   94.9744   90.000
ZERR    4.000   0.0002   0.0008   0.0004    0.000    0.0012    0.000
LATT  1
SYMM -X, 1/2+Y, 1/2-Z
SFAC C H N O
UNIT 96 84 12 16
TEMP -123
SIZE .25 .25 .20

EQIV $1 1+X, 0.5-Y, -0.5+Z
EQIV $2 1-X, 1-Y, 2-Z
EQIV $3 1-X, 0.5+Y, 1.5-Z
HTAB N1 O11
HTAB O1 O3_$1
HTAB N11 O11_$2
HTAB N11 O2_$3

L.S. 10
BOND $H
ACTA
CONF
FMAP 2
PLAN 16
OMIT -2 56
OMIT 0 2 0

WGHT    0.046100    0.809700
EXTI    0.003565
FVAR       0.17437
O1    4    0.842043    0.236937    0.549154    11.00000    0.03281    0.02564 =
         0.03795   -0.00120    0.01825    0.00493
H1    2    0.903624    0.213303    0.503571    11.00000    0.06345
O2    4    0.600143    0.175965    0.544757    11.00000    0.04311    0.02029 =
         0.03599   -0.00465    0.01118    0.00196
O3    4    0.045151    0.310797    0.905198    11.00000    0.04442    0.02511 =
         0.04111   -0.00627    0.02524   -0.01346
N1    3    0.253784    0.366916    0.826438    11.00000    0.02313    0.01465 =
         0.02309   -0.00170    0.00762   -0.00184
H10   2    0.300043    0.400324    0.827749    11.00000    0.03173
C1    1    0.665389    0.219556    0.572124    11.00000    0.03173    0.01878 =
         0.02188    0.00364    0.00760    0.00555
C2    1    0.557493    0.259312    0.635878    11.00000    0.02589    0.01726 =
         0.02083    0.00259    0.00624    0.00283
C3    1    0.650928    0.304368    0.683429    11.00000    0.02076    0.02158 =
         0.03208   -0.00133    0.00732    0.00009
C4    1    0.549208    0.338775    0.747907    11.00000    0.02275    0.01865 =
         0.03066   -0.00442    0.00485   -0.00340
C5    1    0.352229    0.329244    0.763821    11.00000    0.02255    0.01501 =
         0.01965    0.00054    0.00517    0.00054
C6    1    0.256087    0.285119    0.713471    11.00000    0.02140    0.02262 =
         0.03023   -0.00420    0.00735   -0.00400
C7    1    0.359727    0.250419    0.650543    11.00000    0.02824    0.01923 =
         0.02787   -0.00482    0.00590   -0.00437
C8    1    0.108876    0.356306    0.892470    11.00000    0.02366    0.02167 =
         0.02037   -0.00239    0.00537   -0.00317
C9    1    0.027720    0.403490    0.949981    11.00000    0.03488    0.02797 =
         0.03018   -0.00769    0.01523   -0.00213
H3    2    0.790055    0.310761    0.673570    11.00000    0.03736
H4    2    0.613273    0.369729    0.784707    11.00000    0.03410
H6    2    0.115959    0.279610    0.719952    11.00000    0.03454
H7    2    0.293872    0.219778    0.615321    11.00000    0.03375
H91   2   -0.097519    0.412379    0.910488    11.00000    0.12445
H92   2    0.110369    0.434957    0.956640    11.00000    0.08746
H93   2   -0.013088    0.393603    1.019735    11.00000    0.08313
O11   4    0.417786    0.471562    0.866231    11.00000    0.02613    0.01423 =
         0.02009    0.00124   -0.00277    0.00011
N11   3    0.431885    0.559384    0.911368    11.00000    0.02930    0.01478 =
         0.01875    0.00056   -0.00448    0.00112
H11   2    0.484645    0.550102    0.978466    11.00000    0.03068
H12   2    0.398937    0.592964    0.896683    11.00000    0.02921
N12   3    0.286575    0.531894    0.740131    11.00000    0.01939    0.01447 =
         0.01802    0.00033   -0.00197    0.00095
C10   1    0.379378    0.519107    0.841974    11.00000    0.01398    0.01689 =
         0.01737    0.00151    0.00223   -0.00065
C11   1    0.221640    0.585252    0.713575    11.00000    0.02457    0.01624 =
         0.01534   -0.00039   -0.00317    0.00246
C12   1    0.028282    0.600175    0.730706    11.00000    0.02640    0.02109 =
         0.01742   -0.00256   -0.00153    0.00494
C13   1   -0.024465    0.653917    0.711505    11.00000    0.03713    0.02464 =
         0.02416   -0.00441   -0.00348    0.01230
C14   1    0.107205    0.689905    0.672895    11.00000    0.05340    0.01738 =
         0.02451   -0.00099   -0.00615    0.00786
C15   1    0.296296    0.673906    0.653166    11.00000    0.04528    0.02076 =
         0.02350    0.00394   -0.00447   -0.00419
C16   1    0.354131    0.621327    0.673754    11.00000    0.02865    0.02206 =
         0.02154    0.00223   -0.00329   -0.00175
C17   1   -0.119146    0.562220    0.764379    11.00000    0.02228    0.03218 =
         0.02335   -0.00213    0.00289    0.00697
C21   1    0.198743    0.489658    0.672452    11.00000    0.02181    0.01693 =
         0.01511    0.00128   -0.00213    0.00117
C22   1   -0.001477    0.477833    0.677753    11.00000    0.02253    0.02120 =
         0.01919    0.00168   -0.00119    0.00021
C23   1   -0.077836    0.432993    0.618630    11.00000    0.02609    0.02576 =
         0.02790   -0.00005   -0.00561   -0.00451
C24   1    0.038442    0.402532    0.555493    11.00000    0.04120    0.02371 =
         0.02304   -0.00504   -0.00756   -0.00203
C25   1    0.234914    0.416281    0.547975    11.00000    0.03921    0.02751 =
         0.02016   -0.00491    0.00120    0.00712
C26   1    0.314981    0.460034    0.606076    11.00000    0.02475    0.02541 =
         0.01957   -0.00046    0.00148    0.00445
C27   1   -0.131967    0.509780    0.741578    11.00000    0.01920    0.03158 =
         0.02576    0.00026    0.00293   -0.00060
H13   2   -0.157453    0.664801    0.727005    11.00000    0.03601
H14   2    0.065012    0.725983    0.660427    11.00000    0.04072
H15   2    0.390139    0.699329    0.626013    11.00000    0.03796
H16   2    0.489626    0.608655    0.661448    11.00000    0.03397
H17   2   -0.225577    0.577895    0.802103    11.00000    0.03254
H23   2   -0.216897    0.423618    0.623455    11.00000    0.03580
H24   2   -0.017232    0.371224    0.515896    11.00000    0.03893
H25   2    0.317758    0.394822    0.504236    11.00000    0.04005
H26   2    0.453316    0.470674    0.604487    11.00000    0.02705
H27   2   -0.246803    0.491157    0.764875    11.00000    0.03786
HKLF 4


REM  a in P2(1)/c
REM wR2 = 0.1015, GooF = S = 1.042, Restrained GooF = 1.042 for all data
REM R1 = 0.0389 for 4316 Fo > 4sig(Fo) and 0.0454 for all 4922 data
REM 365 parameters refined using 0 restraints

END

WGHT      0.0461      0.8097

REM Highest difference peak  0.348,  deepest hole -0.170,  1-sigma level  0.040
Q1    1   0.6079  0.2419  0.6011  11.00000  0.05    0.35
Q2    1   0.2618  0.4683  0.6539  11.00000  0.05    0.27
Q3    1   0.2985  0.6078  0.7169  11.00000  0.05    0.26
Q4    1  -0.0300  0.5809  0.7540  11.00000  0.05    0.26
Q5    1   0.3019  0.3467  0.7970  11.00000  0.05    0.26
Q6    1   0.0119  0.6275  0.7207  11.00000  0.05    0.26
Q7    1   0.1039  0.4827  0.6867  11.00000  0.05    0.26
Q8    1   0.0736  0.3816  0.9205  11.00000  0.05    0.26
Q9    1   0.2444  0.5095  0.7084  11.00000  0.05    0.26
Q10   1   0.3040  0.3091  0.7311  11.00000  0.05    0.25
Q11   1  -0.0427  0.4595  0.6405  11.00000  0.05    0.24
Q12   1   0.2407  0.4809  0.6241  11.00000  0.05    0.24
Q13   1   0.1359  0.5953  0.7474  11.00000  0.05    0.23
Q14   1  -0.0485  0.4930  0.7204  11.00000  0.05    0.23
Q15   1   0.2767  0.6023  0.6788  11.00000  0.05    0.23
Q16   1   0.4651  0.3268  0.7778  11.00000  0.05    0.23
;
_shelx_res_checksum   98812

_shelx_hkl_file
;
   1   0   0   33.57    0.64
  -1   0   0   32.84    0.57
   1   0   0   33.08    0.57
  -1   0   0   32.92    0.58
   1   0   0   33.85    0.59
  -1   0   0   34.72    0.65
  -2   0   0    6.64    0.22
   2   0   0    6.88    0.23
   2   0   0    7.66    0.29
   2   0   0    6.77    0.20
  -2   0   0    7.29    0.30
  -2   0   0    7.25    0.21
  -3   0   0  199.79    3.37
   3   0   0  209.97    3.31
  -3   0   0  211.51    3.59
   3   0   0  203.04    3.52
   3   0   0  207.40    3.39
  -3   0   0  209.10    3.35
   4   0   0    9.26    0.37
   4   0   0    8.32    0.30
  -4   0   0    8.69    0.34
  -4   0   0    7.99    0.47
   5   0   0   10.08    0.44
  -5   0   0    9.68    0.56
  -5   0   0   10.54    0.41
   5   0   0   11.00    0.37
  -6   0   0    1.66    0.24
   6   0   0    1.57    0.18
  -6   0   0    1.20    0.31
   6   0   0    1.67    0.25
   7   0   0    3.08    0.31
  -7   0   0    3.30    0.49
   7   0   0    3.18    0.23
  -8   0   0    2.59    0.46
   8   0   0    2.99    0.24
  -9   0   0    7.35    0.69
   9   0   0    8.36    0.43
  -1  -1   0   34.98    0.63
   1  -1   0   35.23    0.67
   1  -1   0   34.38    0.59
   1  -1   0   33.90    0.58
  -1  -1   0   33.90    0.57
  -1  -1   0   34.85    0.65
  -1   1   0   35.40    0.60
   1   1   0   33.52    0.63
   1   1   0   35.29    0.65
  -1   1   0   33.67    0.67
  -1   1   0   34.30    0.57
   1   1   0   34.13    0.57
  -2  -1   0   92.42    1.67
   2  -1   0   92.30    1.52
   2  -1   0   90.74    1.53
  -2  -1   0   90.56    1.51
  -2  -1   0   93.69    1.57
   2  -1   0   90.35    1.66
  -2   1   0   92.81    1.68
   2   1   0   94.55    1.59
   2   1   0   92.39    1.50
  -2   1   0   93.17    1.51
  -2   1   0   90.26    1.53
   2   1   0   91.36    1.64
   3  -1   0   50.07    1.13
   3  -1   0   51.06    0.95
  -3  -1   0   50.81    0.94
  -3  -1   0   51.72    1.02
   3  -1   0   50.64    0.99
  -3  -1   0   50.98    1.17
   3   1   0   49.24    1.10
   3   1   0   50.68    0.93
  -3   1   0   50.90    1.17
  -3   1   0   50.50    0.96
  -3   1   0   49.51    0.96
   3   1   0   52.79    1.05
   4  -1   0   49.69    0.97
  -4  -1   0   47.62    1.03
  -4  -1   0   47.64    1.24
   4  -1   0   48.49    1.03
  -4  -1   0   46.47    0.96
  -4   1   0   49.03    0.98
  -4   1   0   48.55    1.26
   4   1   0   48.25    0.94
   4   1   0   46.19    1.07
  -5  -1   0    9.97    0.42
  -5  -1   0   10.48    0.59
   5  -1   0   11.06    0.45
   5  -1   0   10.98    0.38
  -5   1   0   11.06    0.60
  -5   1   0   10.58    0.39
   5   1   0   10.76    0.37
   5   1   0   11.36    0.48
  -6  -1   0    5.66    0.50
   6  -1   0    5.13    0.28
   6  -1   0    5.12    0.34
  -6   1   0    5.15    0.32
   6   1   0    5.05    0.27
   6   1   0    5.03    0.36
  -6   1   0    5.43    0.49
   7  -1   0    3.81    0.26
  -7  -1   0    3.12    0.46
   7  -1   0    3.81    0.32
   7   1   0    4.00    0.36
  -7   1   0    4.07    0.53
   7   1   0    4.10    0.27
  -8  -1   0   -0.21    0.21
   8  -1   0    0.78    0.20
  -8   1   0    0.49    0.22
  -8   1   0    0.24    0.25
   8   1   0    0.41    0.13
   8   1   0    0.75    0.23
  -9  -1   0    3.37    0.57
   9  -1   0    3.49    0.27
   9   1   0    2.88    0.30
  -9   1   0    1.49    0.41
   0   2   0    0.01    0.00
  -1  -2   0   36.67    0.61
   1  -2   0   39.00    0.72
  -1  -2   0   36.98    0.69
  -1  -2   0   36.55    0.69
   1  -2   0   37.25    0.64
  -1   2   0   38.21    0.72
   1   2   0   36.65    0.68
  -1   2   0   36.47    0.64
   1   2   0   36.64    0.70
   1   2   0   37.94    0.60
  -2  -2   0    2.46    0.21
  -2  -2   0    2.47    0.15
   2  -2   0    2.57    0.18
   2  -2   0    2.67    0.12
   2  -2   0    2.52    0.12
  -2  -2   0    2.44    0.11
  -2   2   0    2.62    0.10
   2   2   0    2.17    0.15
  -2   2   0    2.51    0.12
  -2   2   0    2.67    0.18
   2   2   0    2.41    0.10
   2   2   0    2.62    0.16
   3  -2   0    4.39    0.21
  -3  -2   0    4.45    0.32
   3  -2   0    4.30    0.20
   3  -2   0    4.52    0.31
  -3  -2   0    4.26    0.25
  -3  -2   0    4.11    0.18
  -3   2   0    4.31    0.19
   3   2   0    3.66    0.26
  -3   2   0    4.39    0.20
  -3   2   0    4.05    0.30
   3   2   0    4.34    0.17
   4  -2   0   18.77    0.50
  -4  -2   0   17.75    0.47
  -4  -2   0   17.42    0.55
   4  -2   0   19.03    0.53
  -4  -2   0   19.03    0.71
  -4   2   0   18.49    0.47
   4   2   0   18.71    0.59
  -4   2   0   18.78    0.70
   4   2   0   18.83    0.46
  -5  -2   0    4.38    0.30
   5  -2   0    4.82    0.28
   5  -2   0    4.67    0.25
  -5  -2   0    4.42    0.41
   5   2   0    4.54    0.22
  -5   2   0    4.78    0.25
  -5   2   0    4.49    0.40
   5   2   0    4.62    0.32
   6  -2   0    4.35    0.26
  -6  -2   0    4.71    0.46
   6  -2   0    4.11    0.29
   6   2   0    4.26    0.34
   6   2   0    4.48    0.25
  -6   2   0    4.72    0.45
  -7  -2   0    3.71    0.51
   7  -2   0    3.99    0.27
   7   2   0    4.16    0.38
   7   2   0    4.45    0.27
  -7   2   0    3.97    0.54
  -7   2   0    4.18    0.29
   8  -2   0    0.05    0.12
  -8  -2   0   -0.34    0.23
   8   2   0   -0.12    0.19
  -8   2   0   -0.13    0.20
  -8   2   0   -0.13    0.19
   8   2   0   -0.01    0.09
   9  -2   0    0.13    0.13
  -9  -2   0   -0.20    0.26
  -9   2   0   -0.11    0.22
   9   2   0    0.18    0.13
   0  -3   0    0.00    0.02
   0  -3   0    0.06    0.02
   0  -3   0    0.03    0.01
   0   3   0    0.02    0.01
   0   3   0    0.00    0.02
   0   3   0    0.05    0.02
  -1  -3   0   60.13    1.06
  -1  -3   0   58.03    1.03
   1  -3   0   59.65    0.94
   1  -3   0   59.58    1.06
   1  -3   0   59.61    0.98
  -1  -3   0   58.31    0.92
  -1   3   0   58.96    1.06
  -1   3   0   57.82    0.93
  -1   3   0   59.58    0.99
   1   3   0   59.82    1.06
   1   3   0   58.94    0.92
   1   3   0   57.49    1.02
   2  -3   0   54.89    1.03
  -2  -3   0   53.31    0.93
   2  -3   0   56.34    1.13
  -2  -3   0   54.54    1.06
  -2  -3   0   56.91    1.19
   2   3   0   55.10    1.06
   2   3   0   55.69    1.08
  -2   3   0   54.87    0.92
  -2   3   0   55.38    0.99
   2   3   0   55.32    0.92
   3  -3   0    3.94    0.30
  -3  -3   0    4.09    0.26
   3  -3   0    4.44    0.21
  -3  -3   0    4.38    0.33
   3  -3   0    4.22    0.19
  -3  -3   0    4.03    0.17
   3   3   0    4.68    0.28
  -3   3   0    3.78    0.20
  -3   3   0    4.41    0.17
   3   3   0    4.19    0.26
  -3   3   0    4.34    0.31
   4  -3   0    3.70    0.21
  -4  -3   0    3.43    0.25
  -4  -3   0    3.42    0.18
   4  -3   0    3.40    0.20
  -4  -3   0    3.18    0.32
   4   3   0    3.18    0.26
  -4   3   0    3.48    0.18
  -4   3   0    3.34    0.30
   4   3   0    3.50    0.17
   5  -3   0    4.51    0.25
   5  -3   0    4.68    0.27
  -5  -3   0    5.39    0.46
   5   3   0    4.61    0.34
  -5   3   0    4.38    0.23
   5   3   0    4.71    0.23
  -5   3   0    4.56    0.39
  -6  -3   0    8.17    0.58
   6  -3   0    8.27    0.37
   6   3   0    8.32    0.34
  -6   3   0    8.46    0.57
  -6   3   0    8.04    0.35
   6   3   0    8.14    0.48
   7  -3   0    0.93    0.15
  -7  -3   0    0.71    0.33
   7   3   0    0.79    0.15
  -7   3   0    1.27    0.20
   7   3   0    0.94    0.24
  -7   3   0    0.79    0.27
   8  -3   0    0.49    0.14
  -8  -3   0    0.07    0.24
  -8   3   0    0.42    0.19
   8   3   0    0.51    0.13
  -8   3   0    0.39    0.24
   8   3   0    0.28    0.22
   9  -3   0   -0.06    0.12
  -9  -3   0   -0.08    0.28
   9   3   0    0.19    0.13
  -9   3   0   -0.01    0.28
   0  -4   0   36.03    0.67
   0  -4   0   36.51    0.59
   0  -4   0   36.87    0.65
   0   4   0   35.58    0.67
   0   4   0   36.05    0.59
   0   4   0   36.41    0.65
   1  -4   0  129.65    2.05
  -1  -4   0  130.46    2.18
  -1  -4   0  129.38    1.99
   1  -4   0  136.31    2.18
  -1   4   0  130.87    2.04
  -1   4   0  130.56    2.09
   1   4   0  130.29    2.18
  -2  -4   0   42.47    0.89
   2  -4   0   43.16    0.81
   2  -4   0   44.09    0.95
  -2  -4   0   42.60    0.90
  -2  -4   0   42.06    0.73
   2   4   0   43.48    0.91
   2   4   0   42.77    0.87
  -2   4   0   42.27    0.70
  -2   4   0   42.35    0.81
  -2   4   0   42.95    0.69
   2   4   0   43.41    0.72
  -2   4   0   42.33    0.93
   3  -4   0   27.99    0.62
  -3  -4   0   26.85    0.76
  -3  -4   0   26.76    0.55
  -3  -4   0   28.24    0.78
   3  -4   0   27.26    0.78
   3   4   0   26.53    0.53
  -3   4   0   26.44    0.50
  -3   4   0   27.78    0.79
  -3   4   0   26.91    0.54
   3   4   0   24.47    0.68
   3   4   0   26.67    0.72
  -3   4   0   26.86    0.62
   4  -4   0   49.09    1.00
  -4  -4   0   49.53    1.26
  -4  -4   0   46.92    1.10
  -4  -4   0   47.58    0.94
  -4   4   0   48.78    1.24
  -4   4   0   49.00    0.94
  -4   4   0   47.71    0.88
   4   4   0   48.92    1.15
   4   4   0   49.01    0.92
  -5  -4   0    0.57    0.23
  -5   4   0    0.28    0.17
   5   4   0    0.48    0.10
  -5   4   0    0.46    0.11
   5   4   0    0.35    0.17
  -5   4   0    0.55    0.11
   6  -4   0    2.65    0.23
  -6  -4   0    3.18    0.45
   6   4   0    3.45    0.34
  -6   4   0    2.59    0.20
  -6   4   0    2.70    0.42
   6   4   0    3.10    0.20
  -6   4   0    2.98    0.23
  -7  -4   0    5.77    0.57
   7  -4   0    4.48    0.30
  -7   4   0    4.44    0.28
   7   4   0    4.89    0.41
  -7   4   0    4.79    0.25
   7   4   0    5.14    0.27
  -7   4   0    4.96    0.48
   8  -4   0    0.55    0.16
  -8  -4   0    0.31    0.30
  -8   4   0    0.43    0.26
   8   4   0    0.61    0.13
   8   4   0    1.20    0.30
  -9  -4   0    0.00    0.32
   9  -4   0    0.49    0.17
  -9   4   0    0.07    0.32
   9   4   0    0.20    0.13
   9   4   0    0.17    0.25
   0  -5   0    0.03    0.03
   0  -5   0    0.06    0.02
   0  -5   0    0.03    0.06
   0   5   0    0.01    0.03
   0   5   0    0.04    0.03
   0   5   0    0.02    0.06
   1  -5   0    1.35    0.12
  -1  -5   0    1.14    0.10
   1  -5   0    1.54    0.09
   1  -5   0    1.49    0.09
  -1  -5   0    1.60    0.14
  -1   5   0    1.55    0.11
   1   5   0    1.58    0.14
  -1   5   0    1.72    0.09
   1   5   0    1.32    0.10
  -1   5   0    1.61    0.09
   2  -5   0   79.57    1.36
  -2  -5   0   80.27    1.48
   2  -5   0   76.44    1.49
  -2  -5   0   77.04    1.25
  -2  -5   0   79.96    1.47
  -2   5   0   79.42    1.23
   2   5   0   77.42    1.24
  -2   5   0   76.50    1.36
   2   5   0   77.90    1.49
   2   5   0   76.47    1.42
  -2   5   0   79.55    1.49
  -3  -5   0    0.07    0.11
  -3  -5   0    0.10    0.13
  -3  -5   0    0.10    0.06
   3  -5   0    0.27    0.14
   3  -5   0    0.14    0.08
  -3   5   0   -0.02    0.04
   3   5   0    0.03    0.12
   3   5   0    0.09    0.10
  -3   5   0    0.16    0.09
  -3   5   0    0.11    0.05
   3   5   0    0.13    0.05
  -3   5   0    0.15    0.12
  -4  -5   0    1.18    0.11
  -4  -5   0    1.27    0.24
   4  -5   0    1.17    0.14
   4   5   0    1.17    0.10
  -4   5   0    0.94    0.21
  -4   5   0    1.06    0.09
  -4   5   0    1.14    0.10
   4   5   0    1.20    0.21
   5  -5   0    6.10    0.30
  -5  -5   0    5.89    0.48
  -5   5   0    6.30    0.22
  -5   5   0    6.44    0.46
   5   5   0    5.73    0.24
  -5   5   0    5.37    0.23
   5   5   0    5.53    0.39
   6  -5   0    0.35    0.11
  -6  -5   0    0.18    0.22
  -6   5   0    0.28    0.09
  -6   5   0    0.17    0.20
  -6   5   0    0.24    0.10
   6   5   0    0.14    0.07
   6   5   0    0.27    0.18
   7  -5   0    0.00    0.10
  -7  -5   0    0.12    0.27
   7   5   0    0.31    0.10
   7   5   0    0.28    0.18
  -7   5   0    0.50    0.21
  -7   5   0    0.32    0.09
  -7   5   0    0.38    0.10
  -8  -5   0   -0.03    0.26
   8  -5   0    0.40    0.14
  -8   5   0    0.21    0.26
   8   5   0    0.61    0.14
   8   5   0    0.41    0.25
   9  -5   0    0.17    0.14
  -9  -5   0   -0.04    0.41
   9   5   0    0.63    0.28
  -9   5   0    0.18    0.32
   9   5   0    0.12    0.13
   0  -6   0   12.97    0.35
   0  -6   0   12.59    0.25
   0  -6   0   13.09    0.32
   0   6   0   12.67    0.32
   0   6   0   12.94    0.26
   0   6   0   12.62    0.35
   1  -6   0   54.59    0.95
  -1  -6   0   53.16    1.00
   1  -6   0   55.54    0.95
   1  -6   0   54.80    1.04
  -1  -6   0   53.45    1.06
  -1   6   0   54.34    0.95
  -1   6   0   55.28    0.94
  -1   6   0   55.75    1.03
   1   6   0   53.47    1.07
   1   6   0   53.81    0.99
  -2  -6   0    1.03    0.15
   2  -6   0    0.83    0.06
  -2  -6   0    1.02    0.15
   2  -6   0    1.44    0.20
   2  -6   0    0.86    0.10
  -2  -6   0    0.89    0.05
  -2   6   0    0.95    0.05
  -2   6   0    0.97    0.15
   2   6   0    1.05    0.16
   2   6   0    0.92    0.05
  -2   6   0    1.23    0.14
   3  -6   0   20.13    0.51
  -3  -6   0   18.84    0.41
  -3  -6   0   20.17    0.64
  -3  -6   0   19.54    0.61
  -3   6   0   20.14    0.64
   3   6   0   19.34    0.40
   3   6   0   19.35    0.63
   4  -6   0   11.27    0.39
  -4  -6   0   11.34    0.54
  -4  -6   0   11.08    0.32
   4   6   0   12.40    0.53
   4   6   0   12.00    0.31
  -4   6   0   11.84    0.54
  -5  -6   0    0.25    0.19
   5  -6   0    0.01    0.08
   5   6   0   -0.05    0.11
   5   6   0   -0.03    0.05
  -5   6   0   -0.06    0.13
   6  -6   0    0.14    0.09
  -6  -6   0    0.54    0.24
   6   6   0    0.07    0.07
  -6   6   0    0.22    0.18
   7  -6   0    1.22    0.20
  -7  -6   0    1.31    0.39
   7   6   0    1.56    0.33
  -7   6   0    1.49    0.33
   7   6   0    1.37    0.17
   8  -6   0    0.72    0.18
  -8  -6   0    0.00    0.23
  -8   6   0    0.72    0.29
   8   6   0    0.96    0.26
   8   6   0    0.75    0.14
   9  -6   0    0.01    0.14
   9   6   0   -0.26    0.27
   0  -7   0    0.07    0.07
   0  -7   0    0.06    0.04
   0  -7   0    0.01    0.02
   0   7   0    0.07    0.04
   0   7   0    0.12    0.07
   0   7   0    0.03    0.02
  -1  -7   0    6.66    0.28
  -1  -7   0    6.68    0.27
   1  -7   0    6.45    0.20
   1  -7   0    6.86    0.26
   1  -7   0    5.92    0.21
  -1   7   0    6.19    0.21
   1   7   0    6.34    0.32
  -1   7   0    6.14    0.20
   1   7   0    6.49    0.23
   2  -7   0   59.70    1.09
  -2  -7   0   59.41    1.23
   2  -7   0   58.72    1.24
  -2  -7   0   58.95    1.19
   2  -7   0   61.10    1.03
   2   7   0   59.61    0.93
   2   7   0   58.02    1.15
  -2   7   0   59.44    1.10
  -2   7   0   58.64    0.97
   2   7   0   59.88    1.26
  -2   7   0   60.44    1.22
  -3  -7   0    9.18    0.42
   3  -7   0    8.94    0.32
  -3  -7   0    9.01    0.24
  -3  -7   0    9.30    0.43
   3   7   0    9.07    0.43
  -3   7   0    9.17    0.42
   3   7   0    8.72    0.22
   4  -7   0    8.94    0.34
  -4  -7   0    8.74    0.47
  -4  -7   0    8.82    0.27
   4   7   0    8.71    0.25
  -4   7   0    8.64    0.46
   4   7   0    8.31    0.44
  -5  -7   0    4.08    0.40
   5  -7   0    4.70    0.27
  -5  -7   0    4.12    0.21
   5   7   0    4.30    0.36
  -5   7   0    4.62    0.39
   5   7   0    4.57    0.20
  -6  -7   0    0.20    0.23
   6  -7   0   -0.07    0.08
   6   7   0    0.15    0.08
  -6   7   0   -0.05    0.15
   6   7   0   -0.18    0.13
   7  -7   0    5.81    0.34
   7   7   0    5.59    0.27
   7   7   0    4.87    0.46
  -7   7   0    5.54    0.59
  -8  -7   0   -0.14    0.26
   8  -7   0    0.08    0.12
   8   7   0    0.10    0.22
   8   7   0    0.08    0.10
  -8   7   0   -0.09    0.20
  -9  -7   0   -0.17    0.40
   9  -7   0   -0.22    0.12
   9   7   0    0.07    0.11
  -9   7   0    0.53    0.31
   9   7   0   -0.11    0.25
   0  -8   0   22.29    0.41
   0  -8   0   21.62    0.51
   0  -8   0   21.83    0.54
   0   8   0   22.02    0.42
   0   8   0   22.08    0.55
   1  -8   0    0.56    0.09
  -1  -8   0    0.39    0.08
   1  -8   0    0.45    0.07
  -1  -8   0    0.33    0.10
   1  -8   0    0.48    0.09
   1   8   0    0.36    0.07
   1   8   0    0.58    0.12
  -1   8   0    0.37    0.07
  -1   8   0    0.24    0.06
  -1   8   0    0.40    0.08
  -2  -8   0   12.03    0.42
   2  -8   0   12.05    0.34
  -2  -8   0   11.41    0.45
   2  -8   0   11.86    0.30
   2  -8   0   11.82    0.45
   2   8   0   11.99    0.20
  -2   8   0   11.90    0.35
   2   8   0   11.54    0.38
   2   8   0   12.38    0.47
  -2   8   0   11.77    0.42
  -2   8   0   11.88    0.28
   3  -8   0    8.02    0.30
  -3  -8   0    7.25    0.20
  -3  -8   0    6.98    0.38
  -3   8   0    7.65    0.39
   3   8   0    7.80    0.19
   3   8   0    7.36    0.40
  -4  -8   0    0.60    0.08
  -4  -8   0    0.50    0.18
   4  -8   0    0.47    0.12
   4   8   0    0.43    0.08
   4   8   0    0.44    0.16
  -4   8   0    0.47    0.16
   5  -8   0    7.05    0.34
  -5  -8   0    7.17    0.28
  -5  -8   0    7.40    0.53
   5   8   0    7.87    0.25
  -5   8   0    6.63    0.46
   5   8   0    7.20    0.46
  -6  -8   0    6.90    0.58
   6  -8   0    7.47    0.37
  -6   8   0    8.74    0.57
   6   8   0    7.73    0.29
   6   8   0    7.32    0.53
  -7  -8   0    0.43    0.32
   7  -8   0    0.49    0.15
   7   8   0    0.95    0.26
   7   8   0    0.67    0.14
  -8  -8   0    2.09    0.46
   8  -8   0    3.07    0.26
  -8   8   0    3.15    0.49
   8   8   0    2.57    0.20
   8   8   0    2.37    0.42
  -9  -8   0   -0.04    0.36
   9  -8   0    0.48    0.17
  -9   8   0    0.31    0.24
   9   8   0    0.49    0.31
   9   8   0    0.26    0.13
   0  -9   0    0.08    0.07
   0  -9   0    0.20    0.06
   0  -9   0    0.03    0.03
   0   9   0    0.05    0.03
   0   9   0   -0.04    0.08
  -1  -9   0   46.64    0.73
   1  -9   0   46.50    0.92
  -1  -9   0   46.27    0.94
   1  -9   0   46.37    0.86
   1   9   0   45.67    1.00
  -1   9   0   47.62    0.86
   1   9   0   47.19    1.04
  -1   9   0   46.24    0.91
  -1   9   0   47.28    0.96
  -2  -9   0    5.73    0.29
   2  -9   0    6.03    0.24
  -2  -9   0    6.08    0.35
   2  -9   0    5.72    0.22
   2  -9   0    5.69    0.31
   2   9   0    5.59    0.26
  -2   9   0    6.71    0.32
   2   9   0    5.46    0.34
  -2   9   0    6.11    0.20
  -2   9   0    5.67    0.24
  -3  -9   0    9.32    0.43
   3  -9   0    7.50    0.30
   3   9   0    8.54    0.20
   3   9   0    8.00    0.42
   3   9   0    8.47    0.19
  -3   9   0    9.06    0.42
  -4  -9   0    1.54    0.10
   4  -9   0    1.65    0.16
  -4  -9   0    1.98    0.29
  -4   9   0    1.48    0.24
   4   9   0    1.54    0.26
   4   9   0    1.65    0.09
  -5  -9   0    2.93    0.18
  -5  -9   0    2.38    0.35
   5  -9   0    2.85    0.22
   5   9   0    3.36    0.47
   5   9   0    3.02    0.15
  -5   9   0    2.46    0.35
  -6  -9   0    0.05    0.22
   6  -9   0    0.02    0.10
   6   9   0    0.13    0.07
  -6   9   0    0.26    0.18
   6   9   0    0.16    0.20
  -7  -9   0    3.26    0.53
   7   9   0    3.66    0.46
   7   9   0    3.30    0.20
  -7   9   0    2.85    0.42
  -8  -9   0    4.47    0.67
   8  -9   0    4.20    0.32
   8   9   0    4.70    0.57
  -8   9   0    3.86    0.52
   8   9   0    4.48    0.26
  -9  -9   0    0.99    0.46
   9   9   0    1.22    0.38
   9   9   0    1.02    0.19
  -9   9   0    1.01    0.36
   0 -10   0    3.95    0.24
   0 -10   0    4.07    0.21
   0 -10   0    3.83    0.13
   0 -10   0    4.01    0.20
   0  10   0    3.85    0.24
   0  10   0    4.17    0.14
  -1 -10   0  147.95    2.60
   1 -10   0  145.90    2.46
   1 -10   0  145.85    2.53
  -1 -10   0  144.73    2.22
  -1 -10   0  147.50    2.23
  -1 -10   0  145.14    2.48
   1 -10   0  147.64    2.37
  -1  10   0  146.28    2.45
  -1  10   0  149.20    2.50
   1  10   0  141.43    2.47
  -1  10   0  143.35    2.37
   1  10   0  143.85    2.60
   2 -10   0    0.33    0.10
  -2 -10   0    0.51    0.13
   2 -10   0    0.31    0.10
   2 -10   0    0.34    0.13
  -2  10   0    0.37    0.11
  -2  10   0    0.48    0.10
  -2  10   0    0.53    0.10
   2  10   0    0.44    0.16
  -3 -10   0   19.53    0.65
   3 -10   0   20.55    0.54
   3  10   0   21.53    0.73
   3  10   0   19.53    0.36
   3  10   0   20.42    0.35
  -3  10   0   20.57    0.66
   4  10   0   11.91    0.58
   4  10   0   11.70    0.29
   4  10   0   11.65    0.27
  -4  10   0   11.67    0.61
   5 -10   0   11.21    0.44
  -5 -10   0   11.95    0.64
   5  10   0   11.93    0.31
  -5  10   0   11.47    0.62
   5  10   0   10.45    0.36
   5  10   0   11.01    0.61
   6 -10   0    1.83    0.24
  -6 -10   0    1.97    0.38
   6  10   0    1.95    0.14
  -6  10   0    1.88    0.33
   6  10   0    2.44    0.37
   7 -10   0    9.87    0.47
  -7 -10   0   10.39    0.74
   7  10   0    9.62    0.65
   7  10   0   10.01    0.34
  -7  10   0    9.79    0.67
  -8 -10   0    1.29    0.44
   8 -10   0    2.26    0.28
   8  10   0    1.82    0.18
  -8  10   0    2.21    0.43
   8  10   0    2.48    0.45
  -9 -10   0    0.88    0.39
   9 -10   0    0.58    0.20
   9  10   0    0.33    0.30
  -9  10   0    0.49    0.32
   0 -11   0    0.18    0.08
   0 -11   0    0.10    0.04
   0 -11   0    0.02    0.06
   0 -11   0    0.20    0.12
   0  11   0    0.19    0.13
   0  11   0   -0.02    0.05
   1 -11   0    0.33    0.11
  -1 -11   0    0.14    0.08
  -1 -11   0    0.29    0.14
   1 -11   0    0.25    0.07
  -1 -11   0    0.20    0.04
  -1 -11   0    0.18    0.03
   1 -11   0    0.23    0.13
  -1  11   0    0.25    0.11
  -1  11   0    0.18    0.08
   1  11   0    0.44    0.16
  -1  11   0    0.14    0.08
   1  11   0    0.16    0.07
  -2 -11   0    8.96    0.38
   2 -11   0    9.14    0.31
   2 -11   0    9.20    0.31
  -2  11   0    9.23    0.32
  -2  11   0    9.42    0.39
   2  11   0    9.16    0.45
  -2  11   0   10.20    0.31
   3 -11   0    6.03    0.27
   3 -11   0    5.99    0.19
  -3 -11   0    6.37    0.36
   3  11   0    5.93    0.39
  -3  11   0    5.97    0.35
  -3  11   0    6.29    0.17
   4 -11   0   58.13    1.31
  -4 -11   0   63.28    1.61
   4  11   0   59.01    1.02
   4  11   0   61.51    1.54
   4  11   0   61.09    1.00
  -4  11   0   59.91    1.46
   5 -11   0   57.09    1.25
  -5 -11   0   56.37    1.54
   5  11   0   56.25    1.04
   5  11   0   56.60    1.54
   5  11   0   56.70    0.99
  -5  11   0   56.29    1.52
   6 -11   0    7.19    0.38
  -6 -11   0    7.96    0.62
   6  11   0    7.37    0.32
  -6  11   0    8.58    0.57
   6  11   0    7.97    0.26
   6  11   0    8.10    0.57
   7 -11   0    1.88    0.26
  -7 -11   0    2.36    0.45
   7  11   0    1.12    0.33
   7  11   0    1.39    0.14
  -7  11   0    1.70    0.33
   8 -11   0    1.72    0.26
  -8 -11   0    1.57    0.45
   8  11   0    2.02    0.39
   8  11   0    2.10    0.18
  -8  11   0    1.85    0.36
  -9 -11   0    5.78    0.79
   9 -11   0    6.39    0.44
  -9  11   0    6.60    0.68
   9  11   0    7.05    0.65
   0 -12   0   68.63    1.34
   0 -12   0   67.28    1.39
   0 -12   0   68.76    1.15
   0 -12   0   71.98    1.36
   0  12   0   68.18    1.40
   0  12   0   67.58    1.17
   1 -12   0   15.79    0.40
  -1 -12   0   16.67    0.30
  -1 -12   0   15.51    0.56
  -1 -12   0   17.24    0.51
   1 -12   0   16.63    0.51
  -1 -12   0   16.37    0.29
   1  12   0   16.45    0.59
  -1  12   0   16.97    0.51
  -1  12   0   16.59    0.50
  -2 -12   0   15.16    0.52
   2 -12   0   15.87    0.44
   2 -12   0   15.01    0.44
  -2  12   0   15.60    0.52
   2  12   0   15.56    0.61
  -2  12   0   15.65    0.43
  -3 -12   0   17.71    0.63
   3 -12   0   18.27    0.52
   3 -12   0   17.21    0.42
  -3  12   0   18.08    0.63
   3  12   0   18.19    0.70
  -3  12   0   17.78    0.39
  -4 -12   0   -0.17    0.14
   4 -12   0    0.03    0.08
  -4  12   0    0.00    0.11
   4  12   0    0.09    0.04
   4  12   0    0.07    0.03
   4  12   0    0.18    0.17
  -5 -12   0   20.88    0.88
   5 -12   0   20.96    0.65
  -5  12   0   19.60    0.81
   5  12   0   22.47    0.90
   5  12   0   20.94    0.46
   5  12   0   21.12    0.46
  -6 -12   0    0.98    0.29
   6 -12   0    0.64    0.16
   6  12   0    0.72    0.25
   6  12   0    0.87    0.09
  -6  12   0    0.81    0.25
   6  12   0    0.98    0.13
   7 -12   0    0.55    0.16
  -7 -12   0    0.65    0.29
   7  12   0    0.52    0.10
  -7  12   0    0.60    0.27
   7  12   0    0.71    0.26
   8 -12   0    0.23    0.15
  -8 -12   0    0.04    0.29
  -8  12   0   -0.17    0.19
   8  12   0   -0.28    0.24
  -9 -12   0    0.19    0.37
   9 -12   0    1.40    0.25
   9  12   0    1.41    0.40
  -9  12   0    1.21    0.35
   0 -13   0    0.07    0.13
   0 -13   0    0.10    0.05
   0 -13   0    0.15    0.08
   0  13   0    0.08    0.05
   0  13   0    0.05    0.11
   1 -13   0   13.63    0.37
   1 -13   0   14.82    0.49
  -1 -13   0   14.57    0.28
  -1 -13   0   13.59    0.46
  -1 -13   0   14.09    0.26
  -1  13   0   14.46    0.39
   1  13   0   14.32    0.56
  -1  13   0   14.12    0.47
  -1  13   0   14.65    0.48
  -2 -13   0    5.62    0.31
   2 -13   0    6.18    0.25
   2 -13   0    5.26    0.27
  -2  13   0    5.99    0.26
  -2  13   0    5.46    0.30
   2  13   0    5.52    0.37
   3 -13   0   21.52    0.59
  -3 -13   0   23.45    0.74
   3 -13   0   22.23    0.52
  -3  13   0   23.56    0.74
  -3  13   0   22.18    0.49
   3  13   0   22.26    0.81
  -4 -13   0    1.08    0.24
   4 -13   0    0.71    0.14
   4  13   0    0.89    0.24
  -4  13   0    0.77    0.19
   5 -13   0    7.05    0.36
  -5 -13   0    7.68    0.54
   5  13   0    8.71    0.57
  -5  13   0    6.96    0.48
   5  13   0    7.21    0.19
   5  13   0    7.05    0.21
  -6 -13   0   11.77    0.74
   6 -13   0   12.53    0.52
   6  13   0   11.46    0.71
  -6  13   0   12.35    0.67
   6  13   0   13.33    0.32
  -7 -13   0    8.69    0.71
   7 -13   0    9.42    0.48
  -7  13   0   10.07    0.66
   7  13   0   10.39    0.30
   7  13   0   10.02    0.71
  -8 -13   0    3.13    0.56
   8 -13   0    3.15    0.30
   8  13   0    3.84    0.56
  -8  13   0    3.21    0.49
  -9 -13   0    0.80    0.42
  -9  13   0    0.28    0.25
   9  13   0   -0.03    0.30
   0 -14   0   67.52    1.46
   0 -14   0   71.70    1.19
   0 -14   0   71.20    1.41
   0  14   0   70.10    1.49
   0  14   0   69.68    1.21
   1 -14   0   43.22    1.00
  -1 -14   0   42.98    0.99
   1 -14   0   43.99    0.85
  -1 -14   0   44.21    0.74
  -1 -14   0   44.33    0.72
  -1  14   0   43.09    0.87
  -1  14   0   44.24    1.01
   1  14   0   43.58    1.12
  -1  14   0   43.55    1.00
  -2 -14   0   31.11    0.82
   2 -14   0   28.68    0.72
   2 -14   0   31.89    0.70
   2  14   0   29.50    0.93
  -2  14   0   30.01    0.82
   3 -14   0   68.44    1.29
   3 -14   0   71.10    1.37
  -3  14   0   69.02    1.68
  -3  14   0   69.25    1.25
   4 -14   0    1.54    0.20
  -4 -14   0    1.26    0.25
   4  14   0    1.69    0.31
  -4  14   0    1.20    0.22
  -5 -14   0    6.55    0.50
   5 -14   0    6.78    0.35
   5  14   0    5.98    0.14
   5  14   0    6.08    0.16
   5  14   0    6.24    0.51
  -5  14   0    5.97    0.44
   6 -14   0    7.60    0.41
  -6 -14   0    8.00    0.61
  -6  14   0    8.07    0.55
   6  14   0    7.99    0.24
   6  14   0    7.31    0.57
   7 -14   0    2.86    0.32
  -7 -14   0    3.23    0.52
   7  14   0    2.70    0.15
  -7  14   0    3.35    0.46
   8 -14   0    1.54    0.27
  -8 -14   0    2.17    0.47
   8  14   0    1.28    0.40
  -8  14   0    1.54    0.35
   0 -15   0   -0.07    0.05
   0 -15   0    0.02    0.04
   0  15   0   -0.04    0.05
   0  15   0   -0.10    0.08
  -1 -15   0   23.68    0.42
   1 -15   0   23.36    0.69
  -1 -15   0   23.39    0.44
  -1 -15   0   24.11    0.68
   1 -15   0   23.93    0.54
   1  15   0   22.53    0.77
  -1  15   0   23.87    0.56
  -1  15   0   23.44    0.67
  -1  15   0   23.42    0.69
   2 -15   0    6.78    0.32
   2 -15   0    6.76    0.28
  -2 -15   0    7.53    0.38
   2  15   0    7.39    0.45
  -2  15   0    7.59    0.37
  -2  15   0    7.36    0.32
  -3 -15   0    4.65    0.33
   3 -15   0    4.59    0.24
   3 -15   0    3.97    0.24
  -3  15   0    4.63    0.32
  -3  15   0    4.40    0.22
   3  15   0    4.75    0.66
  -4 -15   0   10.35    0.55
   4 -15   0    9.14    0.39
  -4  15   0    9.67    0.52
   4  15   0    9.91    0.61
  -5 -15   0    5.09    0.48
   5 -15   0    5.34    0.31
   5  15   0    4.71    0.45
  -5  15   0    5.15    0.41
  -6  15   0    3.28    0.42
   6  15   0    3.65    0.13
   6  15   0    3.59    0.12
   6  15   0    3.76    0.51
   7 -15   0    1.86    0.26
  -7 -15   0    1.13    0.36
   7  15   0    2.53    0.47
   7  15   0    1.57    0.12
  -7  15   0    1.56    0.33
  -8 -15   0    0.89    0.44
   8 -15   0    1.18    0.21
   8  15   0    1.89    0.46
  -8  15   0    1.19    0.29
   0 -16   0    1.82    0.11
   0 -16   0    1.80    0.19
   0  16   0    1.81    0.12
   0  16   0    1.71    0.24
  -1 -16   0    0.13    0.04
   1 -16   0    0.13    0.12
  -1 -16   0    0.10    0.07
  -1 -16   0    0.15    0.03
   1 -16   0    0.10    0.05
  -1  16   0    0.23    0.12
  -1  16   0    0.22    0.08
  -1  16   0    0.19    0.09
   1  16   0    0.14    0.14
   2 -16   0    0.11    0.06
  -2 -16   0    0.02    0.08
  -2  16   0    0.07    0.10
   2  16   0    0.12    0.14
  -2  16   0   -0.03    0.07
   3 -16   0   20.02    0.56
  -3 -16   0   21.18    0.73
   3 -16   0   19.99    0.58
  -3  16   0   19.79    0.53
   3  16   0   18.91    0.81
  -3  16   0   19.75    0.70
   4 -16   0   45.51    1.06
  -4 -16   0   46.63    1.29
  -4  16   0   45.23    1.24
   4  16   0   45.16    1.40
   5 -16   0    2.96    0.25
  -5 -16   0    3.63    0.45
   5  16   0    2.94    0.44
  -5  16   0    3.03    0.39
  -6 -16   0    0.93    0.31
   6 -16   0    1.15    0.20
   6  16   0    2.13    0.43
  -6  16   0    1.41    0.30
  -7 -16   0    6.36    0.61
   7 -16   0    5.16    0.36
  -7  16   0    5.75    0.49
   7  16   0    4.81    0.53
   8  16   0    0.30    0.30
  -8  16   0   -0.11    0.20
   0 -17   0    0.07    0.07
   0 -17   0    0.05    0.04
   0  17   0    0.04    0.06
   0  17   0   -0.12    0.10
  -1 -17   0    0.47    0.04
  -1 -17   0    0.57    0.06
  -1 -17   0    0.63    0.14
   1 -17   0    0.57    0.09
   1  17   0    0.47    0.18
  -1  17   0    0.42    0.15
  -1  17   0    0.51    0.13
  -1  17   0    0.51    0.11
  -2 -17   0    3.20    0.26
   2 -17   0    2.65    0.24
   2 -17   0    3.04    0.20
  -2  17   0    2.85    0.24
  -2  17   0    2.67    0.23
   2  17   0    3.32    0.34
  -3 -17   0    1.71    0.26
   3 -17   0    2.04    0.19
   3 -17   0    1.96    0.20
  -3  17   0    2.28    0.24
   3  17   0    2.14    0.35
   4 -17   0    2.70    0.23
  -4 -17   0    2.17    0.32
  -4  17   0    2.43    0.32
   4  17   0    2.38    0.42
  -5 -17   0    1.89    0.34
   5 -17   0    2.25    0.26
  -5  17   0    2.03    0.34
   5  17   0    1.94    0.38
   6 -17   0    1.24    0.21
  -6 -17   0    1.48    0.35
  -6  17   0    1.41    0.28
  -7 -17   0    0.00    0.21
   7 -17   0    0.06    0.13
   7  17   0   -0.09    0.23
  -7  17   0    0.16    0.16
  -8 -17   0   -0.17    0.34
   8 -17   0    0.22    0.16
   8  17   0    0.39    0.34
  -8  17   0   -0.07    0.19
   0 -18   0   25.33    0.54
   0  18   0   25.30    0.60
   0  18   0   26.92    0.85
  -1 -18   0    5.82    0.34
   1 -18   0    6.10    0.24
  -1 -18   0    5.75    0.15
  -1 -18   0    5.88    0.17
  -1  18   0    5.47    0.32
  -1  18   0    4.62    0.34
   1  18   0    5.99    0.42
  -2 -18   0    1.86    0.25
   2 -18   0    1.87    0.16
   2 -18   0    1.76    0.23
  -2  18   0    2.05    0.25
  -2  18   0    1.78    0.23
   2  18   0    1.92    0.31
  -3 -18   0    2.15    0.30
   3 -18   0    1.92    0.19
   3 -18   0    2.01    0.19
  -3  18   0    1.90    0.26
  -3  18   0    1.99    0.19
   3  18   0    1.90    0.35
   4 -18   0    1.57    0.11
   4 -18   0    1.59    0.21
  -4 -18   0    1.37    0.28
   4  18   0    2.17    0.38
  -4  18   0    1.70    0.27
   5 -18   0    1.67    0.23
  -5 -18   0    1.36    0.31
   5  18   0    1.87    0.39
  -5  18   0    1.73    0.29
   6 -18   0    2.21    0.28
  -6 -18   0    3.05    0.47
  -6  18   0    2.73    0.40
   6  18   0    3.57    0.54
   7 -18   0    0.54    0.18
  -7 -18   0    0.47    0.31
  -7  18   0    0.77    0.24
   7  18   0    0.72    0.33
   8 -18   0    1.39    0.23
  -8 -18   0    1.60    0.47
   8  18   0    1.97    0.45
  -8  18   0    2.30    0.41
   0 -19   0    0.01    0.09
   0 -19   0    0.02    0.04
   0  19   0   -0.21    0.10
   0  19   0    0.03    0.06
  -1 -19   0    4.90    0.32
   1 -19   0    5.36    0.23
  -1 -19   0    5.27    0.17
  -1 -19   0    5.25    0.15
  -1  19   0    5.08    0.32
  -1  19   0    4.91    0.36
   1  19   0    5.74    0.44
  -2 -19   0   20.05    0.71
   2 -19   0   21.81    0.78
   2 -19   0   20.26    0.56
  -2  19   0   20.60    0.71
  -2  19   0   19.89    0.67
   2  19   0   21.45    0.86
   3 -19   0   23.08    0.65
  -3 -19   0   22.59    0.82
   3  19   0   24.85    0.98
  -3  19   0   23.16    0.66
  -3  19   0   20.93    0.77
   4 -19   0    7.77    0.27
   4 -19   0    7.84    0.38
  -4 -19   0    8.12    0.52
  -4  19   0    7.85    0.26
   4  19   0    7.78    0.58
  -4  19   0    7.43    0.46
  -5 -19   0    3.33    0.43
   5 -19   0    3.59    0.29
  -5  19   0    3.05    0.33
   5  19   0    3.89    0.53
   6 -19   0    2.92    0.28
  -6 -19   0    2.71    0.45
   6  19   0    2.86    0.50
  -6  19   0    2.83    0.41
   7 -19   0    0.71    0.18
  -7 -19   0    0.63    0.34
  -7  19   0    0.39    0.22
   7  19   0    1.12    0.38
   8 -19   0    0.55    0.18
  -8 -19   0   -0.19    0.38
  -8  19   0    0.44    0.28
   0 -20   0   10.14    0.47
   0 -20   0   10.37    0.29
   0  20   0    8.91    0.50
   1 -20   0   31.16    0.70
  -1 -20   0   31.82    0.56
  -1 -20   0   31.23    0.91
  -1 -20   0   30.93    0.59
   1  20   0   32.00    1.06
  -1  20   0   30.65    0.93
  -2 -20   0   22.95    0.78
   2 -20   0   23.26    0.61
  -2  20   0   22.50    0.76
   2  20   0   22.31    0.92
  -2  20   0   22.05    0.73
   3 -20   0    3.40    0.27
  -3 -20   0    3.21    0.33
   3 -20   0    3.09    0.23
  -3  20   0    3.24    0.25
  -3  20   0    3.58    0.31
   3  20   0    2.38    0.40
   4 -20   0    0.43    0.15
  -4 -20   0    0.30    0.18
   4 -20   0    0.20    0.10
  -4  20   0    0.29    0.10
   4  20   0    0.17    0.22
  -4  20   0    0.19    0.13
   5 -20   0    0.50    0.17
  -5 -20   0    0.29    0.19
   5  20   0    0.63    0.30
  -5  20   0    0.60    0.23
   6 -20   0    2.71    0.26
  -6 -20   0    2.88    0.44
  -6  20   0    1.96    0.35
   6  20   0    2.66    0.46
   7 -20   0   -0.02    0.11
  -7 -20   0   -0.01    0.25
  -7  20   0    0.06    0.18
   7  20   0    0.10    0.30
   8 -20   0    0.73    0.22
  -8 -20   0    0.14    0.35
  -8  20   0    0.35    0.27
   8  20   0   -0.10    0.33
   0 -21   0    0.14    0.11
   0 -21   0    0.02    0.04
   0 -21   0   -0.09    0.06
   0  21   0    0.29    0.17
   1 -21   0    4.21    0.32
  -1 -21   0    3.44    0.14
  -1 -21   0    4.57    0.33
  -1 -21   0    4.05    0.13
   1 -21   0    4.03    0.21
   1  21   0    3.11    0.41
  -1  21   0    4.35    0.36
   2 -21   0    9.99    0.43
  -2 -21   0    9.25    0.49
  -2  21   0    8.83    0.46
   2  21   0   11.14    0.65
  -2  21   0    8.51    0.47
  -3 -21   0    1.48    0.26
   3 -21   0    1.45    0.22
   3 -21   0    1.40    0.19
  -3  21   0    1.26    0.22
   3  21   0    1.46    0.33
  -3  21   0    1.50    0.22
   4 -21   0    1.87    0.24
  -4 -21   0    1.82    0.33
   4 -21   0    1.67    0.17
  -4  21   0    1.51    0.18
   4  21   0    1.36    0.34
  -4  21   0    1.79    0.28
   5 -21   0    8.04    0.42
  -5 -21   0    7.84    0.57
  -5  21   0    7.64    0.53
   5  21   0    8.29    0.66
  -6 -21   0    0.24    0.23
   6 -21   0    0.35    0.12
  -6  21   0    0.17    0.17
   6  21   0    0.30    0.22
   7 -21   0   -0.15    0.10
  -7 -21   0   -0.12    0.31
   7  21   0    0.54    0.28
  -7  21   0    0.07    0.17
   0 -22   0    0.05    0.07
   0 -22   0    0.37    0.14
   0 -22   0    0.09    0.06
   0  22   0   -0.09    0.17
  -1 -22   0   11.28    0.28
  -1 -22   0   11.25    0.25
   1 -22   0   11.03    0.52
   1 -22   0   11.37    0.36
  -1 -22   0   11.69    0.54
   1  22   0   12.30    0.67
  -1  22   0   10.17    0.56
  -2 -22   0   15.58    0.66
   2 -22   0   15.44    0.49
   2  22   0   14.79    0.79
  -2  22   0   16.27    0.64
  -2  22   0   15.98    0.65
   3 -22   0    0.74    0.20
   3 -22   0    0.45    0.13
  -3 -22   0    0.41    0.18
  -3  22   0    0.59    0.17
   3  22   0   -0.05    0.17
  -3  22   0    0.46    0.16
   4 -22   0    5.58    0.34
   4 -22   0    6.24    0.30
  -4 -22   0    6.69    0.52
   4  22   0    6.20    0.58
  -4  22   0    6.19    0.44
  -4  22   0    6.79    0.30
  -5 -22   0    0.84    0.28
   5 -22   0    0.87    0.18
   5  22   0    0.65    0.28
  -5  22   0    0.68    0.22
   6 -22   0    0.23    0.13
  -6 -22   0    0.13    0.21
   6  22   0   -0.06    0.27
  -6  22   0    0.17    0.15
  -7 -22   0   -0.09    0.26
   7 -22   0    0.12    0.17
   7  22   0    0.27    0.27
   0 -23   0    0.08    0.05
   0 -23   0    0.02    0.09
   0 -23   0   -0.03    0.07
   0  23   0   -0.13    0.15
  -1 -23   0    0.78    0.07
  -1 -23   0    0.91    0.08
   1 -23   0    0.56    0.11
  -1 -23   0    0.90    0.18
   1 -23   0    0.64    0.17
   1  23   0    1.19    0.30
  -1  23   0    0.91    0.28
  -2 -23   0   18.79    0.74
   2 -23   0   17.65    0.53
  -2  23   0   17.17    0.70
   2  23   0   18.94    0.89
  -2  23   0   17.66    0.70
   3 -23   0    0.79    0.15
  -3 -23   0    0.63    0.21
  -3  23   0    0.75    0.19
  -3  23   0    0.86    0.19
   3  23   0    0.61    0.24
   4 -23   0    1.52    0.22
  -4 -23   0    1.43    0.31
   4  23   0    1.42    0.36
  -4  23   0    1.15    0.26
  -5 -23   0    1.16    0.30
   5 -23   0    1.72    0.25
  -5  23   0    1.08    0.28
   5  23   0    1.86    0.40
  -6 -23   0    1.17    0.34
   6 -23   0    1.50    0.25
   6  23   0    0.95    0.37
  -6  23   0    1.14    0.30
  -7 -23   0    0.97    0.36
   7 -23   0    0.76    0.19
  -7  23   0    0.52    0.26
   7  23   0    1.28    0.44
   0 -24   0    6.56    0.28
   0 -24   0    7.33    0.25
   0 -24   0    6.47    0.42
   0  24   0    7.33    0.53
   1 -24   0   34.91    0.77
  -1 -24   0   34.64    0.61
  -1 -24   0   33.50    0.63
  -1 -24   0   33.57    1.04
   1 -24   0   32.81    1.03
  -1  24   0   34.93    1.11
   1  24   0   34.77    1.22
  -2 -24   0   43.72    1.25
   2 -24   0   43.09    0.98
  -2  24   0   43.96    1.23
   2  24   0   44.80    1.47
  -2  24   0   44.18    1.22
  -3 -24   0    0.17    0.14
   3 -24   0   -0.04    0.10
   3  24   0    0.18    0.23
  -3  24   0    0.20    0.14
  -3  24   0    0.24    0.17
  -4 -24   0    2.05    0.36
   4 -24   0    2.30    0.27
   4  24   0    2.22    0.43
  -4  24   0    2.21    0.33
  -4  24   0    2.16    0.23
  -5 -24   0   -0.02    0.19
   5 -24   0    0.07    0.12
   5  24   0   -0.17    0.23
  -5  24   0    0.22    0.18
   6 -24   0    0.15    0.14
  -6 -24   0    0.62    0.28
  -6  24   0    0.09    0.19
   6  24   0    0.49    0.36
   7 -24   0    3.10    0.36
  -7 -24   0    3.71    0.57
   7  24   0    3.46    0.59
  -7  24   0    2.98    0.47
   0 -25   0    0.18    0.12
   0 -25   0    0.02    0.05
   0  25   0    0.15    0.22
  -1 -25   0   12.92    0.28
   1 -25   0   13.07    0.41
  -1 -25   0   12.49    0.29
  -1 -25   0   12.21    0.60
   1 -25   0   12.54    0.60
  -1  25   0   12.45    0.66
   1  25   0   12.74    0.74
  -2 -25   0    2.06    0.31
   2 -25   0    2.26    0.19
  -2  25   0    2.77    0.29
   2  25   0    2.39    0.41
  -3 -25   0    8.14    0.52
   3 -25   0    7.31    0.36
   3  25   0    7.49    0.63
  -3  25   0    6.92    0.45
  -3  25   0    7.45    0.49
  -4 -25   0    2.03    0.36
  -4  25   0    2.00    0.25
   4  25   0    2.02    0.42
  -4  25   0    1.76    0.30
  -5 -25   0    2.45    0.42
   5 -25   0    2.89    0.28
  -5  25   0    2.73    0.38
   5  25   0    2.64    0.50
  -6 -25   0    0.42    0.29
   6 -25   0    0.15    0.12
  -6  25   0   -0.03    0.16
   6  25   0    0.03    0.32
   0 -26   0   17.54    0.74
   0 -26   0   19.11    0.46
   0  26   0   19.46    0.88
   1 -26   0    3.16    0.20
  -1 -26   0    2.81    0.12
  -1 -26   0    2.83    0.35
   1 -26   0    2.76    0.30
  -1 -26   0    2.79    0.11
   1  26   0    2.66    0.47
  -1  26   0    3.08    0.41
   2 -26   0    0.92    0.16
  -2 -26   0    1.41    0.27
  -2  26   0    1.21    0.26
   2  26   0    0.90    0.29
  -3 -26   0    5.90    0.46
   3 -26   0    5.11    0.31
  -3  26   0    5.75    0.44
   3  26   0    5.72    0.56
  -3  26   0    5.49    0.40
   4 -26   0   -0.01    0.11
  -4 -26   0    0.15    0.18
  -4  26   0    0.03    0.15
   4  26   0    0.27    0.24
  -4  26   0    0.08    0.16
  -5 -26   0    4.71    0.49
   5 -26   0    5.58    0.37
   5  26   0    6.21    0.66
  -5  26   0    5.52    0.48
  -6 -26   0    0.95    0.32
   6 -26   0    1.23    0.22
  -6  26   0    1.37    0.30
   6  26   0    0.73    0.38
   0 -27   0    0.00    0.13
   0 -27   0    0.02    0.05
   0  27   0    0.22    0.19
   1 -27   0    1.63    0.26
   1 -27   0    1.50    0.19
  -1 -27   0    1.17    0.23
  -1 -27   0    1.53    0.07
  -1  27   0    1.44    0.30
   1  27   0    1.44    0.35
   2 -27   0    1.26    0.17
   2 -27   0    1.58    0.26
  -2 -27   0    1.24    0.25
   2  27   0    1.14    0.32
  -2  27   0    1.10    0.28
   3 -27   0    1.56    0.20
  -3 -27   0    1.17    0.27
  -3  27   0    0.90    0.26
   3  27   0    0.77    0.31
  -3  27   0    1.40    0.26
   4 -27   0    0.96    0.18
  -4 -27   0    0.85    0.24
  -4  27   0    0.69    0.25
   4  27   0    1.29    0.35
  -4  27   0    0.88    0.23
   5 -27   0    2.28    0.30
  -5 -27   0    2.40    0.43
  -5  27   0    1.54    0.29
   5  27   0    1.76    0.42
   6 -27   0   -0.01    0.13
  -6 -27   0   -0.05    0.26
  -6  27   0   -0.11    0.20
   6  27   0   -0.11    0.27
   0 -28   0    0.28    0.07
   0 -28   0    0.26    0.13
   0  28   0    0.08    0.20
   1 -28   0    0.26    0.16
  -1 -28   0    0.48    0.19
  -1 -28   0    0.48    0.05
   1 -28   0    0.35    0.10
  -1  28   0    0.48    0.25
   1  28   0    0.75    0.30
   2 -28   0    2.94    0.37
   2 -28   0    2.14    0.20
  -2 -28   0    2.74    0.38
   2  28   0    1.99    0.43
  -2  28   0    2.77    0.38
   3 -28   0    2.43    0.26
  -3 -28   0    2.94    0.40
  -3  28   0    2.19    0.33
   3  28   0    2.61    0.49
   4 -28   0    0.23    0.11
  -4 -28   0    0.53    0.24
  -4  28   0    0.39    0.19
   4  28   0   -0.12    0.24
   5 -28   0    8.25    0.45
  -5  28   0    7.16    0.64
  -6 -28   0    1.45    0.39
   6  28   0    1.26    0.44
  -6  28   0    0.96    0.31
   0 -29   0    0.07    0.06
   0 -29   0    0.29    0.13
   0  29   0   -0.19    0.21
   1 -29   0    6.55    0.46
   1 -29   0    6.64    0.29
  -1 -29   0    6.80    0.50
   1  29   0    6.94    0.63
  -1  29   0    6.85    0.55
   2 -29   0   -0.02    0.13
   2 -29   0    0.08    0.08
  -2 -29   0    0.17    0.14
   2  29   0    0.16    0.26
  -2  29   0    0.36    0.22
  -3 -29   0    0.29    0.18
   3 -29   0   -0.15    0.09
  -3  29   0    0.15    0.21
   3  29   0    0.53    0.32
  -4 -29   0    0.61    0.22
   4 -29   0    0.28    0.15
  -4  29   0    0.49    0.22
   4  29   0    0.57    0.33
   5 -29   0    0.54    0.16
  -5 -29   0    0.36    0.23
  -5  29   0    0.35    0.21
   5  29   0    0.31    0.31
   0 -30   0    1.16    0.25
   0 -30   0    1.04    0.12
   0  30   0    1.49    0.43
   1 -30   0    0.20    0.14
  -1 -30   0   -0.01    0.13
   1 -30   0    0.21    0.09
  -1  30   0   -0.13    0.20
   1  30   0    0.11    0.26
   2 -30   0    2.00    0.32
   2 -30   0    1.61    0.20
  -2 -30   0    2.00    0.35
  -2  30   0    1.96    0.36
   2  30   0    1.64    0.36
  -3 -30   0    0.05    0.16
   3 -30   0    0.07    0.11
  -3  30   0    0.15    0.24
   3  30   0    0.09    0.27
   4 -30   0   -0.28    0.10
  -4  30   0    0.13    0.14
   4  30   0    0.02    0.28
   5 -30   0    1.97    0.28
  -5 -30   0    2.07    0.42
   5  30   0    2.67    0.53
  -5  30   0    2.02    0.37
   0 -31   0    0.11    0.07
   0 -31   0    0.09    0.14
   0  31   0   -0.28    0.25
   1 -31   0    2.50    0.19
  -1 -31   0    2.58    0.38
   1 -31   0    2.38    0.35
  -1  31   0    1.91    0.40
   1  31   0    1.96    0.41
   2 -31   0    1.20    0.17
   2 -31   0    1.06    0.26
  -2 -31   0    1.17    0.26
   2  31   0    0.80    0.30
  -2  31   0    0.65    0.32
   3 -31   0    0.28    0.19
   3 -31   0    0.38    0.12
  -3 -31   0    0.54    0.24
   3  31   0    0.62    0.37
  -3  31   0    0.39    0.27
  -4 -31   0    0.30    0.18
   4 -31   0    0.04    0.12
   4  31   0    0.16    0.32
  -4  31   0   -0.11    0.13
   0 -32   0   10.23    0.63
   0  32   0   10.13    0.74
   1 -32   0    1.05    0.26
   1 -32   0    0.56    0.12
  -1 -32   0    0.51    0.20
   1  32   0    0.52    0.32
   2 -32   0    5.47    0.30
   2 -32   0    5.49    0.46
  -2 -32   0    5.49    0.51
   2  32   0    4.60    0.63
  -2  32   0    6.59    0.59
   3 -32   0    3.21    0.26
   3 -32   0    3.22    0.54
  -3 -32   0    3.45    0.54
   3  32   0    4.04    0.62
  -4 -32   0    1.65    0.35
   4 -32   0    0.98    0.21
   4  32   0    0.96    0.47
  -4  32   0    1.38    0.30
   0 -33   0    0.35    0.16
   0  33   0    0.12    0.27
  -1 -33   0    5.03    0.45
   1 -33   0    4.72    0.42
  -1  33   0    3.56    0.53
   1  33   0    4.67    0.64
  -2 -33   0    0.28    0.27
   2 -33   0    0.28    0.11
  -2  33   0   -0.11    0.29
   2  33   0    0.22    0.27
   3 -33   0    1.69    0.32
  -3 -33   0    0.62    0.23
   3 -33   0    0.72    0.17
   3  33   0    0.30    0.31
   0 -34   0    0.12    0.16
   0  34   0    0.28    0.36
  -1 -34   0    3.68    0.46
   1 -34   0    2.98    0.41
  -1  34   0    2.75    0.51
   1  34   0    3.42    0.55
  -2 -34   0    0.18    0.21
   2 -34   0    0.14    0.15
   2 -34   0    0.03    0.12
  -3 -34   0    2.66    0.51
   0 -35   0   -0.06    0.14
   0  35   0   -0.05    0.32
   1 -35   0    0.47    0.21
  -1 -35   0    0.50    0.20
  -1  35   0    0.11    0.37
   1  35   0   -0.03    0.28
  -2 -35   0    1.72    0.42
   9   0  -1    0.22    0.14
  -9   0   1   -0.12    0.24
   8   0  -1    0.01    0.09
  -8   0   1   -0.11    0.21
   7   0  -1    0.16    0.09
  -7   0   1    0.08    0.19
   7   0  -1   -0.14    0.13
   6   0  -1    0.07    0.13
   6   0  -1    0.02    0.08
  -6   0   1    0.17    0.18
  -6   0   1   -0.03    0.13
  -5   0   1   -0.09    0.14
   5   0  -1    0.06    0.10
   5   0  -1    0.19    0.08
  -4   0   1   -0.02    0.11
   4   0  -1    0.04    0.06
  -4   0   1    0.14    0.10
  -3   0   1    0.01    0.10
  -3   0   1    0.24    0.14
   3   0  -1    0.19    0.13
   3   0  -1    0.05    0.07
   3   0  -1    0.03    0.08
  -3   0   1    0.09    0.08
  -2   0   1    0.06    0.08
   2   0  -1    0.03    0.07
  -2   0   1   -0.07    0.05
   2   0  -1    0.04    0.04
   2   0  -1    0.07    0.05
  -2   0   1    0.02    0.04
   1   0  -1    0.04    0.05
  -1   0   1   -0.01    0.05
   1   0  -1    0.04    0.03
  -1   0   1    0.02    0.06
   1   0  -1   -0.02    0.03
   1   0  -1   -0.02    0.05
   1   0   1   -0.04    0.05
  -1   0  -1    0.06    0.03
  -1   0  -1    0.04    0.06
  -1   0  -1    0.05    0.06
   1   0   1    0.04    0.06
   1   0   1   -0.04    0.02
  -2   0  -1    0.06    0.07
  -2   0  -1    0.13    0.07
  -2   0  -1    0.04    0.03
   2   0   1    0.00    0.06
   2   0   1    0.03    0.06
   2   0   1    0.04    0.03
  -3   0  -1    0.05    0.09
  -3   0  -1    0.04    0.13
   3   0   1    0.07    0.12
   3   0   1   -0.04    0.11
  -3   0  -1    0.06    0.06
   3   0   1    0.03    0.05
  -4   0  -1    0.00    0.08
   4   0   1    0.03    0.04
  -4   0  -1    0.13    0.13
   4   0   1    0.20    0.08
   5   0   1    0.01    0.12
  -5   0  -1   -0.07    0.09
   5   0   1   -0.07    0.05
  -5   0  -1    0.06    0.14
   6   0   1   -0.03    0.06
  -6   0  -1    0.21    0.18
   6   0   1   -0.05    0.14
   7   0   1   -0.14    0.07
  -7   0  -1   -0.20    0.14
   7   0   1    0.12    0.16
   8   0   1    0.08    0.11
  -8   0  -1    0.34    0.23
  -8   0  -1    0.09    0.21
   9   0   1    0.15    0.12
  -9   0  -1   -0.12    0.28
  -9  -1   1    0.09    0.30
   9  -1  -1    0.17    0.12
  -9   1   1   -0.34    0.23
   9   1  -1    0.09    0.13
   8  -1  -1    0.02    0.09
  -8  -1   1   -0.19    0.19
   8   1  -1    0.09    0.10
   8   1  -1    0.20    0.17
  -8   1   1   -0.01    0.22
   7  -1  -1    3.00    0.23
   7  -1  -1    2.58    0.27
  -7  -1   1    1.76    0.38
  -7   1   1    2.71    0.26
  -7   1   1    2.09    0.38
   7   1  -1    2.45    0.31
   7   1  -1    2.45    0.22
  -6  -1   1   28.59    1.08
   6  -1  -1   26.54    0.72
   6  -1  -1   25.97    0.76
   6   1  -1   26.40    0.82
  -6   1   1   27.20    0.74
  -6   1   1   26.74    1.05
   6   1  -1   26.50    0.70
   5  -1  -1    0.46    0.12
   5  -1  -1    0.80    0.14
  -5  -1   1    0.59    0.21
  -5  -1   1    0.96    0.18
  -5   1   1    0.51    0.22
  -5   1   1    0.80    0.15
   5   1  -1    0.82    0.17
   5   1  -1    0.60    0.12
   4  -1  -1   25.47    0.61
   4  -1  -1   25.42    0.62
  -4  -1   1   24.89    0.66
  -4  -1   1   25.53    0.83
  -4  -1   1   25.14    0.60
  -4   1   1   24.59    0.61
   4   1  -1   25.23    0.59
   4   1  -1   25.10    0.67
  -4   1   1   25.08    0.83
  -3  -1   1    4.17    0.19
  -3  -1   1    4.51    0.34
   3  -1  -1    4.65    0.32
   3  -1  -1    4.11    0.19
   3  -1  -1    3.99    0.19
  -3  -1   1    3.88    0.23
  -3   1   1    3.74    0.19
   3   1  -1    4.13    0.18
  -3   1   1    3.85    0.21
  -3   1   1    4.16    0.30
   3   1  -1    4.27    0.23
   3   1  -1    3.99    0.28
   2  -1  -1  467.35   12.60
  -2  -1   1  441.46   12.44
   2   1  -1  472.11   12.90
  -2   1   1  453.15   12.43
   1  -1  -1  791.89   15.32
  -1  -1   1  807.95   15.66
   1   1  -1  790.75   15.69
   0  -1   1    0.34    0.02
   0  -1   1    0.26    0.02
   0   1   1    0.34    0.02
   0   1  -1    0.35    0.05
   0   1   1    0.30    0.02
   1  -1   1  112.24    1.83
  -1  -1  -1  113.27    1.86
  -1   1  -1  108.34    1.84
   1   1   1  108.46    1.81
  -1   1  -1  114.69    1.84
  -1   1  -1  113.24    1.84
   1   1   1  113.05    1.88
   2  -1   1   36.20    0.78
  -2  -1  -1   35.30    0.78
  -2  -1  -1   34.93    0.73
  -2  -1  -1   35.27    0.64
   2  -1   1   33.98    0.65
   2  -1   1   34.78    0.73
  -2   1  -1   35.68    0.79
   2   1   1   34.21    0.74
   2   1   1   33.92    0.63
  -2   1  -1   33.02    0.70
  -2   1  -1   34.85    0.65
   2   1   1   34.28    0.76
   3  -1   1   28.29    0.69
   3  -1   1   27.96    0.59
   3  -1   1   28.17    0.75
  -3  -1  -1   27.04    0.78
  -3  -1  -1   27.87    0.68
  -3  -1  -1   26.74    0.58
  -3   1  -1   27.52    0.60
   3   1   1   27.25    0.57
  -3   1  -1   28.48    0.64
  -3   1  -1   28.01    0.78
   3   1   1   27.35    0.73
   4  -1   1   15.13    0.51
  -4  -1  -1   13.51    0.53
   4  -1   1   13.68    0.40
  -4  -1  -1   14.22    0.60
  -4   1  -1   14.07    0.44
   4   1   1   13.89    0.52
   4   1   1   15.07    0.40
  -4   1  -1   13.40    0.59
   5  -1   1   25.67    0.77
   5  -1   1   25.34    0.64
  -5  -1  -1   25.66    0.73
  -5  -1  -1   26.75    0.94
  -5   1  -1   25.47    0.94
  -5   1  -1   25.13    0.68
   5   1   1   25.39    0.62
   5   1   1   25.14    0.80
  -6  -1  -1    0.41    0.20
   6  -1   1    0.48    0.12
   6  -1   1    0.21    0.16
   6   1   1    0.51    0.17
  -6   1  -1    0.44    0.16
  -6   1  -1    0.24    0.18
   6   1   1    0.46    0.10
   7  -1   1    3.16    0.24
  -7  -1  -1    3.33    0.48
   7   1   1    3.25    0.24
   7   1   1    3.10    0.34
  -7   1  -1    3.10    0.36
  -7   1  -1    3.01    0.47
  -8  -1  -1    1.21    0.34
  -8   1  -1    1.96    0.32
   8   1   1    1.75    0.23
  -8   1  -1    1.19    0.33
  -9  -1  -1    1.71    0.37
   9  -1   1    1.57    0.23
  -9   1  -1    1.21    0.37
   9   1   1    1.61    0.23
   9  -2  -1    0.54    0.18
  -9  -2   1    0.32    0.28
   9   2  -1    0.67    0.17
  -9   2   1    0.36    0.30
  -8  -2   1    0.75    0.31
   8  -2  -1    1.03    0.22
  -8   2   1    0.96    0.22
   8   2  -1    0.99    0.17
  -8   2   1    1.35    0.38
   8   2  -1    1.44    0.31
   7  -2  -1    1.06    0.19
  -7  -2   1    0.92    0.32
   7  -2  -1    1.25    0.18
   7   2  -1    1.15    0.24
   7   2  -1    1.10    0.17
  -7   2   1    1.16    0.30
  -7   2   1    1.22    0.18
  -6  -2   1    2.88    0.41
   6  -2  -1    3.24    0.24
   6  -2  -1    3.24    0.24
   6   2  -1    3.01    0.21
  -6   2   1    3.51    0.45
  -6   2   1    3.50    0.26
   6   2  -1    3.14    0.29
  -5  -2   1    0.16    0.16
   5  -2  -1   -0.02    0.07
   5  -2  -1    0.11    0.10
  -5  -2   1   -0.03    0.12
  -5   2   1   -0.02    0.14
   5   2  -1    0.07    0.07
   5   2  -1   -0.03    0.11
  -5   2   1    0.03    0.09
   4  -2  -1   33.51    0.73
  -4  -2   1   32.06    0.97
   4  -2  -1   35.16    0.76
  -4  -2   1   33.65    0.73
  -4   2   1   33.65    0.72
   4   2  -1   34.95    0.72
   4   2  -1   33.56    0.83
  -4   2   1   33.32    0.99
   3  -2  -1    1.28    0.23
   3  -2  -1    0.96    0.11
   3  -2  -1    0.85    0.12
  -3  -2   1    0.85    0.11
  -3  -2   1    1.18    0.23
  -3  -2   1    1.10    0.17
   3   2  -1    1.12    0.18
   3   2  -1    0.85    0.11
  -3   2   1    0.82    0.12
  -3   2   1    1.01    0.13
  -3   2   1    0.91    0.19
  -2  -2   1   45.16    1.05
  -2  -2   1   47.64    0.83
   2  -2  -1   48.01    0.80
  -2  -2   1   46.91    0.92
   2  -2  -1   47.29    0.87
   2  -2  -1   47.02    0.99
   2   2  -1   46.17    0.82
  -2   2   1   48.41    0.87
  -2   2   1   48.79    0.81
   2   2  -1   46.89    0.95
   2   2  -1   47.45    0.92
  -1  -2   1    7.75    0.23
   1  -2  -1    7.23    0.20
   1  -2  -1    8.12    0.25
  -1  -2   1    7.65    0.25
  -1  -2   1    7.80    0.17
   1  -2  -1    7.89    0.18
   1   2  -1    7.43    0.24
   1   2  -1    7.94    0.22
  -1   2   1    7.38    0.20
  -1   2   1    7.32    0.18
   1   2  -1    7.74    0.17
  -1   2   1    7.79    0.24
   0  -2  -1    0.38    0.06
   0  -2   1    0.16    0.02
   0  -2   1    0.13    0.04
   0  -2  -1    0.18    0.04
   0   2   1    0.10    0.02
   0   2   1    0.18    0.02
   0   2  -1    0.20    0.04
   0   2  -1    0.16    0.02
   0   2   1    0.19    0.04
   1  -2   1   29.69    0.60
   1  -2   1   28.71    0.53
  -1  -2  -1   30.29    0.50
  -1  -2  -1   30.47    0.62
  -1  -2  -1   30.28    0.58
   1  -2   1   29.47    0.59
  -1   2  -1   29.98    0.60
   1   2   1   29.48    0.50
   1   2   1   29.98    0.64
   1   2   1   30.20    0.57
  -1   2  -1   30.25    0.54
  -1   2  -1   29.47    0.59
  -2  -2  -1   57.08    0.97
   2  -2   1   56.61    1.13
  -2  -2  -1   57.23    1.13
  -2  -2  -1   56.87    1.10
  -2   2  -1   54.87    1.00
   2   2   1   58.55    1.14
   2   2   1   56.03    1.09
  -2   2  -1   55.74    1.05
  -2   2  -1   58.12    1.04
  -2   2  -1   57.65    1.14
   2   2   1   56.30    0.96
   3  -2   1    1.93    0.25
  -3  -2  -1    1.35    0.11
  -3  -2  -1    1.76    0.24
   3  -2   1    1.68    0.17
  -3  -2  -1    1.73    0.20
   3  -2   1    1.51    0.13
   3   2   1    1.49    0.11
  -3   2  -1    1.45    0.15
  -3   2  -1    1.39    0.13
   3   2   1    1.62    0.20
   3   2   1    1.56    0.20
  -3   2  -1    2.22    0.27
   4  -2   1   10.08    0.34
  -4  -2  -1   10.59    0.41
   4  -2   1   10.15    0.41
  -4  -2  -1    9.83    0.33
  -4  -2  -1   10.10    0.51
   4   2   1   10.07    0.31
  -4   2  -1   10.04    0.35
   4   2   1   10.33    0.46
  -4   2  -1    9.50    0.49
   5  -2   1    1.21    0.15
   5  -2   1    1.38    0.21
  -5  -2  -1    1.22    0.26
  -5   2  -1    1.52    0.28
   5   2   1    0.88    0.21
   5   2   1    1.22    0.15
  -5   2  -1    1.68    0.19
   6  -2   1    1.83    0.20
  -6  -2  -1    1.73    0.35
   6   2   1    1.70    0.28
  -6   2  -1    1.26    0.20
   6   2   1    1.51    0.17
  -6   2  -1    1.16    0.29
   7  -2   1    0.07    0.09
  -7  -2  -1    0.32    0.24
   7   2   1    0.22    0.19
   7   2   1    0.16    0.09
  -7   2  -1    0.19    0.18
  -7   2  -1    0.18    0.17
  -8  -2  -1   -0.30    0.22
   8  -2   1    0.19    0.10
  -8   2  -1    0.38    0.20
  -8   2  -1    0.06    0.22
   8   2   1    0.19    0.11
   8   2   1    0.21    0.20
  -9  -2  -1   -0.54    0.22
   9  -2   1    0.11    0.13
   9   2   1    0.01    0.11
  -9   2  -1   -0.11    0.25
  -9  -3   1    3.42    0.55
   9  -3  -1    3.44    0.31
  -9   3   1    2.44    0.51
   9   3  -1    3.63    0.28
  -8  -3   1    0.19    0.22
   8  -3  -1    0.05    0.10
   8   3  -1    0.27    0.11
  -8   3   1    0.13    0.24
   8   3  -1    0.40    0.19
  -8   3   1    0.30    0.23
   7  -3  -1    4.19    0.28
  -7  -3   1    4.17    0.56
   7   3  -1    4.16    0.39
   7   3  -1    4.62    0.27
  -7   3   1    4.49    0.26
  -7   3   1    5.05    0.49
   6  -3  -1    2.50    0.21
  -6  -3   1    2.98    0.43
   6   3  -1    2.28    0.31
  -6   3   1    2.48    0.39
   6   3  -1    2.45    0.19
  -6   3   1    2.30    0.19
   5  -3  -1    2.16    0.18
   5  -3  -1    2.09    0.17
  -5  -3   1    2.01    0.32
  -5   3   1    1.96    0.30
   5   3  -1    2.22    0.27
  -5   3   1    2.23    0.17
   5   3  -1    1.97    0.16
  -4  -3   1   34.47    0.75
  -4  -3   1   35.10    0.88
   4  -3  -1   36.44    0.74
   4  -3  -1   35.65    0.79
  -4  -3   1   35.82    1.03
  -4   3   1   35.67    1.02
   4   3  -1   35.13    0.73
   4   3  -1   36.69    0.90
  -4   3   1   35.43    0.72
   3  -3  -1    0.81    0.12
  -3  -3   1    1.02    0.18
   3  -3  -1    0.99    0.10
  -3  -3   1    1.17    0.12
   3  -3  -1    1.37    0.22
  -3  -3   1    0.65    0.18
  -3   3   1    0.95    0.13
   3   3  -1    0.71    0.17
  -3   3   1    0.89    0.19
   3   3  -1    1.33    0.14
   3   3  -1    0.77    0.15
  -3   3   1    0.97    0.11
   2  -3  -1  132.64    2.17
   2  -3  -1  131.26    2.31
   2  -3  -1  132.37    2.04
  -2  -3   1  130.04    2.24
  -2  -3   1  131.97    2.29
   2   3  -1  132.70    2.24
  -2   3   1  133.73    2.06
  -2   3   1  130.51    2.16
   2   3  -1  129.14    2.23
   2   3  -1  132.80    2.10
  -2   3   1  135.81    2.33
   1  -3  -1    4.42    0.15
  -1  -3   1    4.40    0.17
   1  -3  -1    4.59    0.13
  -1  -3   1    4.60    0.20
  -1  -3   1    4.39    0.11
   1  -3  -1    4.43    0.13
   1  -3  -1    4.47    0.19
   1   3  -1    4.19    0.19
  -1   3   1    4.66    0.19
  -1   3   1    4.24    0.15
   1   3  -1    4.20    0.16
   1   3  -1    4.47    0.11
   0  -3  -1   55.52    0.92
   0  -3   1   55.08    0.88
   0  -3   1   55.70    0.91
   0  -3   1   53.08    0.97
   0  -3  -1   56.69    0.98
   0  -3  -1   56.09    0.89
   0   3   1   56.48    0.98
   0   3   1   55.95    0.92
   0   3  -1   55.40    0.98
   0   3  -1   56.02    0.88
   0   3  -1   55.12    0.91
   0   3   1   54.93    0.89
   1  -3   1  191.52    3.03
  -1  -3  -1  192.32    3.09
  -1   3  -1  188.02    3.02
  -2  -3  -1  115.92    2.07
  -2  -3  -1  112.92    1.97
  -2  -3  -1  111.75    1.79
   2  -3   1  112.90    1.85
   2  -3   1  112.37    1.99
   2   3   1  110.77    1.93
  -2   3  -1  113.26    1.85
   2   3   1  112.73    2.00
   2   3   1  108.25    1.78
  -2   3  -1  111.66    1.88
  -2   3  -1  110.79    1.86
  -3  -3  -1    0.91    0.10
  -3  -3  -1    1.14    0.21
   3  -3   1    0.90    0.19
  -3  -3  -1    1.17    0.18
   3  -3   1    0.87    0.12
  -3   3  -1    1.03    0.13
  -3   3  -1    0.97    0.14
   3   3   1    1.12    0.20
   3   3   1    0.74    0.15
  -3   3  -1    0.76    0.11
   3   3   1    0.96    0.09
  -3   3  -1    0.84    0.18
  -4  -3  -1   48.11    1.09
   4  -3   1   48.23    0.98
  -4  -3  -1   46.71    0.94
  -4  -3  -1   48.73    1.25
  -4   3  -1   48.37    1.04
  -4   3  -1   50.28    1.26
   4   3   1   47.60    0.92
  -4   3  -1   48.31    0.96
   4   3   1   47.61    1.17
  -5  -3  -1    5.36    0.44
   5  -3   1    5.13    0.30
  -5   3  -1    5.05    0.40
   5   3   1    5.40    0.24
  -5   3  -1    4.87    0.26
  -5   3  -1    4.74    0.30
   5   3   1    4.17    0.34
   6  -3   1    0.39    0.10
  -6  -3  -1    0.55    0.23
  -6   3  -1    0.33    0.14
  -6   3  -1    0.57    0.24
   6   3   1    0.25    0.16
  -7  -3  -1    7.17    0.61
   7  -3   1    7.15    0.35
   7   3   1    7.34    0.34
  -7   3  -1    6.44    0.39
  -7   3  -1    6.57    0.55
  -7   3  -1    6.43    0.35
  -8  -3  -1    0.21    0.27
   8  -3   1    0.43    0.15
  -8   3  -1    0.52    0.21
  -8   3  -1   -0.08    0.21
   8   3   1    0.32    0.12
   8   3   1    0.57    0.25
  -9  -3  -1    4.75    0.66
  -9  -3  -1    4.85    0.59
   9  -3   1    5.33    0.36
   9   3   1    5.48    0.34
  -9   3  -1    6.30    0.76
  -9  -4   1    0.91    0.44
   9  -4  -1    1.52    0.25
  -9   4   1    1.20    0.35
   9   4  -1    0.98    0.30
   9   4  -1    1.18    0.19
   8  -4  -1    0.92    0.21
  -8  -4   1    0.53    0.29
   8   4  -1    0.66    0.23
   8   4  -1    0.93    0.17
  -8   4   1    0.31    0.25
   7  -4  -1    0.11    0.11
  -7  -4   1   -0.02    0.25
  -7   4   1    0.20    0.10
  -7   4   1   -0.16    0.15
   7   4  -1    0.13    0.08
  -7   4   1    0.30    0.11
  -6  -4   1    2.14    0.40
   6  -4  -1    2.58    0.22
  -6   4   1    2.60    0.18
   6   4  -1    2.82    0.35
  -6   4   1    2.31    0.39
   6   4  -1    2.16    0.18
  -5  -4   1    1.79    0.32
   5  -4  -1    1.61    0.14
  -5   4   1    1.55    0.14
   5   4  -1    1.72    0.25
   5   4  -1    1.66    0.14
  -5   4   1    1.53    0.30
  -4  -4   1    3.66    0.19
  -4  -4   1    4.67    0.36
  -4  -4   1    4.01    0.28
   4  -4  -1    3.98    0.17
   4  -4  -1    3.98    0.22
   4   4  -1    4.23    0.28
  -4   4   1    4.03    0.16
   4   4  -1    4.44    0.19
  -4   4   1    4.31    0.34
   3  -4  -1    6.38    0.26
   3  -4  -1    6.27    0.36
  -3  -4   1    6.51    0.37
  -3  -4   1    6.57    0.22
  -3  -4   1    6.75    0.34
   3  -4  -1    6.65    0.17
   3   4  -1    6.18    0.32
  -3   4   1    6.51    0.36
   3   4  -1    6.47    0.21
  -3   4   1    6.67    0.27
   3   4  -1    6.65    0.32
  -3   4   1    6.07    0.18
  -2  -4   1   12.98    0.41
  -2  -4   1   13.20    0.41
   2  -4  -1   13.22    0.43
   2  -4  -1   12.75    0.34
   2   4  -1   13.18    0.29
   2   4  -1   13.21    0.28
   2   4  -1   13.31    0.41
  -2   4   1   13.33    0.35
  -2   4   1   13.65    0.44
   2   4  -1   12.93    0.39
   1  -4  -1    6.56    0.19
  -1  -4   1    6.44    0.14
  -1  -4   1    5.86    0.25
   1  -4  -1    6.46    0.23
  -1  -4   1    6.41    0.21
  -1   4   1    6.36    0.18
  -1   4   1    6.36    0.19
   1   4  -1    6.26    0.24
   1   4  -1    6.49    0.21
  -1   4   1    6.45    0.23
   1   4  -1    5.94    0.13
   0  -4   1   97.15    1.54
   0  -4  -1   96.14    1.60
   0  -4   1   93.71    1.61
   0   4  -1   93.82    1.60
  -1  -4  -1  116.71    1.90
   1  -4   1  113.86    1.92
   1  -4   1  115.26    1.90
  -1  -4  -1  119.12    1.98
  -1   4  -1  115.08    1.89
  -1   4  -1  116.18    1.91
  -1   4  -1  113.53    1.84
   1   4   1  111.97    1.98
   1   4   1  114.17    1.88
  -2  -4  -1   17.04    0.34
   2  -4   1   17.35    0.51
  -2  -4  -1   16.87    0.49
   2  -4   1   17.70    0.40
  -2  -4  -1   16.68    0.47
  -2   4  -1   16.86    0.40
  -2   4  -1   16.99    0.40
   2   4   1   16.80    0.57
  -2   4  -1   16.75    0.41
   2   4   1   17.03    0.45
  -2   4  -1   17.04    0.49
   2   4   1   17.70    0.34
   3  -4   1    0.20    0.13
  -3  -4  -1    0.09    0.06
  -3  -4  -1    0.05    0.11
   3  -4   1    0.06    0.06
  -3  -4  -1    0.03    0.14
   3   4   1    0.07    0.09
  -3   4  -1    0.09    0.12
  -3   4  -1    0.11    0.08
  -3   4  -1    0.00    0.06
  -3   4  -1    0.19    0.10
   3   4   1    0.07    0.14
   4  -4   1    6.72    0.28
  -4  -4  -1    6.87    0.42
  -4  -4  -1    6.58    0.25
  -4  -4  -1    6.36    0.34
   4   4   1    6.11    0.38
  -4   4  -1    6.34    0.25
  -4   4  -1    6.33    0.40
   4   4   1    6.26    0.22
  -4   4  -1    6.54    0.29
  -5  -4  -1    3.43    0.37
   5  -4   1    3.96    0.23
  -5   4  -1    3.87    0.26
  -5   4  -1    4.25    0.23
   5   4   1    4.16    0.20
   5   4   1    3.61    0.33
  -5   4  -1    4.14    0.37
  -6  -4  -1    0.03    0.21
   6  -4   1   -0.07    0.07
  -6   4  -1   -0.01    0.10
  -6   4  -1   -0.02    0.12
  -6   4  -1   -0.12    0.13
   6   4   1   -0.05    0.07
   6   4   1    0.05    0.14
   7  -4   1    1.86    0.22
  -7  -4  -1    2.00    0.40
  -7   4  -1    1.58    0.31
   7   4   1    1.58    0.19
   7   4   1    1.64    0.32
  -7   4  -1    1.62    0.35
  -7   4  -1    2.35    0.27
  -8  -4  -1    4.45    0.64
   8  -4   1    4.09    0.30
  -8   4  -1    3.62    0.52
   8   4   1    4.08    0.41
   8   4   1    4.03    0.26
  -9  -4  -1    0.53    0.35
   9  -4   1    0.36    0.15
  -9   4  -1    0.22    0.30
   9   4   1    0.50    0.15
   9  -5  -1    1.40    0.23
  -9  -5   1    1.83    0.73
   9   5  -1    1.33    0.34
   9   5  -1    0.94    0.18
  -9   5   1    0.82    0.36
   8  -5  -1    0.25    0.15
  -8  -5   1    0.27    0.22
   8   5  -1    0.24    0.11
  -8   5   1    0.23    0.23
   8   5  -1    0.75    0.25
  -7  -5   1   -0.23    0.22
   7  -5  -1   -0.03    0.10
   7   5  -1   -0.02    0.08
   7   5  -1    0.37    0.18
  -7   5   1    0.18    0.22
   6  -5  -1    0.03    0.09
  -6  -5   1    0.09    0.19
  -6   5   1    0.14    0.06
   6   5  -1    0.06    0.07
   6   5  -1    0.24    0.18
  -6   5   1   -0.28    0.13
  -6   5   1    0.07    0.06
   5  -5  -1    5.54    0.29
  -5  -5   1    5.86    0.47
  -5   5   1    5.88    0.19
   5   5  -1    6.35    0.39
  -5   5   1    5.82    0.18
  -5   5   1    6.19    0.44
   5   5  -1    5.34    0.24
  -4  -5   1   11.65    0.48
  -4  -5   1   12.66    0.36
   4  -5  -1   13.08    0.42
  -4  -5   1   13.22    0.58
   4   5  -1   12.84    0.35
  -4   5   1   12.81    0.57
   4   5  -1   12.92    0.51
  -3  -5   1    0.97    0.21
   3  -5  -1    0.85    0.18
   3  -5  -1    0.83    0.12
  -3  -5   1    0.84    0.18
  -3   5   1    1.05    0.20
   3   5  -1    0.71    0.14
   3   5  -1    1.17    0.19
   3   5  -1    0.94    0.09
  -3   5   1    0.67    0.12
  -2  -5   1   10.96    0.39
   2  -5  -1   11.80    0.41
   2  -5  -1   11.82    0.32
  -2  -5   1   10.83    0.37
   2   5  -1   11.04    0.24
  -2   5   1   12.65    0.41
   2   5  -1   11.38    0.25
   2   5  -1   10.86    0.38
  -2   5   1   11.40    0.32
   2   5  -1   11.64    0.36
   1  -5  -1   48.74    0.94
  -1  -5   1   48.52    0.77
  -1  -5   1   47.53    0.96
   1  -5  -1   47.85    0.85
  -1  -5   1   49.04    0.90
   1  -5  -1   46.48    0.82
  -1   5   1   48.12    0.92
   1   5  -1   49.88    0.97
  -1   5   1   46.98    0.85
  -1   5   1   48.70    0.85
   1   5  -1   49.37    0.89
   1   5  -1   46.77    0.77
   0  -5   1   73.68    1.16
   0  -5   1   73.73    1.23
   0  -5  -1   73.27    1.28
   0  -5   1   73.65    1.30
   0  -5  -1   73.44    1.18
   0  -5  -1   73.90    1.24
   0   5  -1   74.37    1.17
   0   5   1   72.61    1.30
   0   5  -1   72.22    1.29
   0   5  -1   72.21    1.23
   0   5   1   71.94    1.23
   1  -5   1   11.72    0.34
   1  -5   1   11.75    0.32
   1  -5   1   12.03    0.28
  -1  -5  -1   11.57    0.37
  -1  -5  -1   11.08    0.31
  -1  -5  -1   11.55    0.21
  -1   5  -1   11.80    0.32
   1   5   1   11.51    0.38
  -1   5  -1   11.69    0.28
   1   5   1   11.46    0.30
   1   5   1   11.91    0.22
  -1   5  -1   12.59    0.32
   2  -5   1    0.04    0.07
   2  -5   1    0.07    0.05
  -2  -5  -1   -0.03    0.07
  -2  -5  -1    0.05    0.07
  -2  -5  -1    0.11    0.03
   2  -5   1    0.10    0.06
   2   5   1    0.03    0.08
   2   5   1    0.02    0.05
  -2   5  -1    0.10    0.05
  -2   5  -1    0.07    0.05
   2   5   1    0.14    0.03
  -2   5  -1    0.02    0.06
  -3  -5  -1   11.02    0.46
  -3  -5  -1   11.20    0.45
  -3  -5  -1   11.39    0.29
   3  -5   1   10.39    0.46
   3  -5   1   11.56    0.35
   3   5   1   11.59    0.28
   3   5   1   10.73    0.40
   3   5   1   10.99    0.47
  -3   5  -1   11.55    0.32
  -3   5  -1   11.73    0.48
  -3   5  -1   10.63    0.33
   4  -5   1    1.04    0.14
  -4  -5  -1    0.83    0.21
  -4  -5  -1    0.94    0.11
  -4   5  -1    1.09    0.11
   4   5   1    0.96    0.09
   4   5   1    1.22    0.22
  -4   5  -1    0.90    0.20
  -4   5  -1    0.96    0.14
   5  -5   1    2.25    0.19
  -5  -5  -1    2.54    0.38
   5   5   1    2.40    0.15
  -5   5  -1    2.10    0.32
  -5   5  -1    2.21    0.16
   5   5   1    2.77    0.30
  -5   5  -1    2.25    0.20
   6  -5   1    2.07    0.20
  -6  -5  -1    3.71    0.48
   6   5   1    2.51    0.18
  -6   5  -1    1.82    0.33
   6   5   1    2.79    0.38
  -6   5  -1    2.91    0.24
  -6   5  -1    2.82    0.20
  -7  -5  -1    6.94    0.60
   7  -5   1    6.31    0.35
  -7   5  -1    6.25    0.31
  -7   5  -1    6.10    0.28
   7   5   1    5.82    0.50
   7   5   1    6.52    0.31
  -7   5  -1    6.55    0.55
   8  -5   1    0.08    0.11
  -8  -5  -1    0.22    0.28
   8   5   1    0.23    0.24
   8   5   1    0.00    0.10
  -8   5  -1    0.29    0.21
   9  -5   1    8.24    0.46
   9   5   1    7.59    0.66
   9   5   1    8.65    0.41
   9  -6  -1    0.30    0.16
   9   6  -1   -0.05    0.25
   8  -6  -1    0.40    0.13
  -8  -6   1    0.50    0.30
  -8   6   1    0.17    0.22
   8   6  -1    0.35    0.12
   8   6  -1    0.48    0.25
  -7  -6   1    3.16    0.48
   7  -6  -1    2.44    0.24
   7   6  -1    2.76    0.21
  -7   6   1    2.43    0.41
   7   6  -1    2.98    0.41
   6  -6  -1    8.84    0.41
  -6  -6   1    9.29    0.66
   6   6  -1    8.86    0.52
   6   6  -1    9.09    0.34
  -6   6   1    9.66    0.61
   5  -6  -1   41.22    0.96
  -5  -6   1   42.98    1.27
   5   6  -1   41.29    0.85
  -5   6   1   42.62    1.25
   5   6  -1   41.26    1.13
  -4  -6   1   11.86    0.56
   4  -6  -1   11.78    0.40
   4   6  -1   12.15    0.33
   4   6  -1   11.94    0.51
  -4   6   1   12.17    0.56
  -3  -6   1   75.28    1.54
  -3  -6   1   73.47    1.50
   3  -6  -1   72.11    1.35
  -3   6   1   73.22    1.54
   3   6  -1   72.58    1.49
   3   6  -1   71.31    1.24
   3   6  -1   71.63    1.22
   2  -6  -1   99.94    1.71
  -2  -6   1  101.00    1.81
  -2  -6   1  100.14    1.86
   2   6  -1  101.08    1.59
   2   6  -1  100.03    1.59
  -2   6   1  100.62    1.85
   2   6  -1  100.88    1.85
   1  -6  -1   49.99    0.96
  -1  -6   1   47.12    0.99
  -1  -6   1   49.49    0.77
  -1  -6   1   46.51    0.91
   1  -6  -1   48.92    0.87
   1  -6  -1   47.51    0.85
  -1   6   1   50.17    0.88
   1   6  -1   48.62    0.99
  -1   6   1   47.89    0.87
   1   6  -1   48.14    0.90
  -1   6   1   49.79    0.95
   0  -6  -1    8.17    0.27
   0  -6   1    7.82    0.23
   0  -6   1    7.73    0.28
   0  -6  -1    7.78    0.24
   0  -6  -1    8.15    0.19
   0  -6  -1    7.66    0.19
   0  -6   1    7.93    0.18
   0   6  -1    7.71    0.28
   0   6   1    7.45    0.23
   0   6   1    7.83    0.28
   0   6  -1    7.82    0.18
  -1  -6  -1   47.77    0.91
  -1  -6  -1   47.33    0.98
   1  -6   1   48.02    0.85
  -1  -6  -1   47.42    0.76
   1  -6   1   47.21    0.91
   1  -6   1   47.83    0.93
  -1   6  -1   48.87    0.92
  -1   6  -1   47.50    0.89
   1   6   1   48.84    0.90
  -1   6  -1   47.73    0.85
   1   6   1   49.24    0.77
   1   6   1   48.69    1.01
  -2  -6  -1    2.96    0.10
  -2  -6  -1    2.62    0.19
   2  -6   1    3.14    0.21
  -2  -6  -1    3.19    0.25
   2  -6   1    3.12    0.16
   2  -6   1    3.10    0.15
  -2   6  -1    2.84    0.15
  -2   6  -1    3.33    0.21
  -2   6  -1    3.16    0.16
   2   6   1    3.01    0.23
   2   6   1    2.82    0.09
   3  -6   1   12.33    0.76
  -3  -6  -1   10.93    0.46
   3  -6   1   11.59    0.35
  -3  -6  -1   10.82    0.28
  -3  -6  -1   11.05    0.47
  -3   6  -1   11.32    0.32
   3   6   1   10.83    0.26
  -3   6  -1   11.05    0.46
  -3   6  -1   11.48    0.31
   3   6   1   10.94    0.48
  -4  -6  -1    2.19    0.16
  -4  -6  -1    1.95    0.28
   4  -6   1    2.04    0.16
  -4   6  -1    1.88    0.15
   4   6   1    1.94    0.27
  -4   6  -1    1.97    0.13
   4   6   1    2.00    0.12
  -4   6  -1    2.15    0.28
   5  -6   1    3.03    0.22
  -5  -6  -1    3.02    0.38
   5   6   1    2.67    0.34
  -5   6  -1    2.63    0.18
  -5   6  -1    3.16    0.40
  -5   6  -1    2.64    0.16
   5   6   1    2.47    0.16
  -6  -6  -1    1.28    0.33
   6  -6   1    1.17    0.18
  -6   6  -1    1.36    0.15
  -6   6  -1    1.69    0.32
   6   6   1    1.35    0.15
   6   6   1    0.94    0.27
  -6   6  -1    1.35    0.16
   7  -6   1    3.34    0.25
  -7  -6  -1    3.84    0.52
  -7   6  -1    3.12    0.18
  -7   6  -1    3.23    0.46
  -7   6  -1    3.07    0.17
   7   6   1    3.24    0.21
   7   6   1    3.30    0.45
  -8  -6  -1    1.74    0.45
   8  -6   1    1.57    0.23
   8   6   1    1.55    0.35
   8   6   1    1.98    0.19
  -8   6  -1    1.90    0.38
   9  -6   1    0.92    0.19
   9   6   1    1.69    0.21
   9   6   1    1.48    0.37
  -9  -7   1    1.41    0.58
   9  -7  -1    0.96    0.21
   9   7  -1    0.91    0.33
  -9   7   1    0.85    0.35
   9   7  -1    0.77    0.15
   8  -7  -1    7.56    0.42
  -8  -7   1    7.71    0.69
   8   7  -1    7.98    0.35
  -8   7   1    7.45    0.64
   8   7  -1    7.71    0.59
   7  -7  -1    0.61    0.16
   7   7  -1    0.31    0.11
   7   7  -1    0.57    0.25
  -6  -7   1   18.81    0.90
   6  -7  -1   17.22    0.59
   6   7  -1   18.09    0.77
  -6   7   1   19.57    0.87
   6   7  -1   17.76    0.49
   5  -7  -1    3.50    0.24
  -5  -7   1    3.23    0.42
   5   7  -1    3.20    0.17
   5   7  -1    3.07    0.32
  -5   7   1    2.76    0.36
   5   7  -1    2.86    0.18
  -4  -7   1    0.55    0.19
   4  -7  -1    0.72    0.12
   4   7  -1    0.86    0.08
  -4   7   1    0.83    0.19
   4   7  -1    0.65    0.16
   4   7  -1    0.58    0.09
  -3  -7   1    1.49    0.23
  -3  -7   1    1.64    0.25
   3  -7  -1    1.60    0.17
  -3   7   1    1.48    0.22
   3   7  -1    1.99    0.25
   3   7  -1    1.45    0.09
   3   7  -1    1.15    0.09
   2  -7  -1    0.11    0.08
   2  -7  -1    0.07    0.04
  -2  -7   1   -0.01    0.11
   2  -7  -1    0.01    0.06
  -2  -7   1    0.02    0.08
  -2   7   1    0.08    0.07
   2   7  -1   -0.07    0.09
  -2   7   1    0.00    0.04
  -2   7   1    0.11    0.07
   2   7  -1    0.15    0.03
   2   7  -1    0.01    0.03
   2   7  -1   -0.03    0.04
   1  -7  -1    4.83    0.17
   1  -7  -1    4.66    0.17
   1  -7  -1    4.35    0.21
  -1  -7   1    4.52    0.24
  -1  -7   1    4.48    0.10
   1   7  -1    4.27    0.18
   1   7  -1    4.96    0.25
  -1   7   1    4.37    0.18
   1   7  -1    4.85    0.11
  -1   7   1    4.58    0.17
  -1   7   1    4.37    0.20
   0  -7  -1    0.04    0.02
   0  -7  -1    0.03    0.03
   0  -7   1    0.03    0.02
   0  -7   1    0.07    0.03
   0  -7  -1    0.02    0.03
   0  -7   1   -0.02    0.06
   0  -7  -1   -0.01    0.05
   0   7   1    0.01    0.03
   0   7   1   -0.05    0.05
   0   7  -1   -0.01    0.06
   0   7  -1    0.03    0.03
   1  -7   1    4.22    0.15
  -1  -7  -1    4.19    0.19
   1  -7   1    4.35    0.20
  -1  -7  -1    3.79    0.22
  -1  -7  -1    4.12    0.09
   1  -7   1    4.38    0.20
   1   7   1    4.38    0.18
   1   7   1    4.03    0.24
   1   7   1    4.28    0.10
  -1   7  -1    3.90    0.19
  -1   7  -1    4.07    0.15
  -2  -7  -1   40.05    0.89
   2  -7   1   39.59    0.81
  -2  -7  -1   40.97    0.68
   2  -7   1   41.16    0.95
  -2  -7  -1   40.60    0.95
   2  -7   1   42.78    0.81
  -2   7  -1   43.42    0.82
   2   7   1   40.58    0.67
  -2   7  -1   40.70    0.91
   2   7   1   40.58    0.86
  -2   7  -1   40.96    0.78
   2   7   1   40.41    0.98
  -3  -7  -1   -0.11    0.12
  -3  -7  -1    0.48    0.23
  -3  -7  -1    0.25    0.06
   3  -7   1    0.07    0.07
  -3   7  -1    0.18    0.11
   3   7   1    0.30    0.16
  -3   7  -1    0.17    0.08
  -3   7  -1    0.23    0.07
   3   7   1    0.23    0.04
  -4  -7  -1    1.79    0.12
   4  -7   1    1.77    0.16
  -4  -7  -1    1.79    0.26
  -4   7  -1    1.60    0.12
   4   7   1    1.99    0.29
  -4   7  -1    1.58    0.24
   4   7   1    1.69    0.11
  -4   7  -1    1.77    0.11
  -5  -7  -1   18.43    0.68
  -5  -7  -1   19.63    0.82
   5  -7   1   18.61    0.57
  -5   7  -1   17.92    0.40
   5   7   1   18.08    0.75
  -5   7  -1   18.27    0.43
  -5   7  -1   19.51    0.79
   5   7   1   18.14    0.45
  -6  -7  -1    7.23    0.57
   6  -7   1    7.69    0.37
  -6   7  -1    7.00    0.22
  -6   7  -1    6.87    0.51
  -6   7  -1    7.16    0.21
   6   7   1    7.86    0.54
   6   7   1    7.50    0.29
   7  -7   1    6.72    0.37
   7   7   1    6.68    0.54
  -7   7  -1    5.89    0.62
   7   7   1    6.57    0.29
   8  -7   1   -0.10    0.10
  -8  -7  -1    0.30    0.28
   8   7   1    0.14    0.22
   8   7   1   -0.07    0.09
  -8   7  -1    0.02    0.23
   9  -7   1    0.76    0.18
  -9  -7  -1    1.06    0.41
  -9   7  -1    1.35    0.44
   9   7   1    1.00    0.19
   9  -8  -1    9.13    0.49
  -9  -8   1    8.03    0.82
  -9   8   1    7.13    0.68
   9   8  -1    8.34    0.38
  -8  -8   1    0.77    0.36
   8  -8  -1    1.11    0.20
   8   8  -1    1.28    0.27
   8   8  -1    1.19    0.16
  -8   8   1    1.02    0.31
  -7  -8   1    1.89    0.47
   7  -8  -1    2.24    0.28
   7   8  -1    2.06    0.36
  -7   8   1    1.85    0.56
   6  -8  -1    0.22    0.13
  -6  -8   1    0.22    0.24
  -6   8   1    0.05    0.17
   6   8  -1    0.08    0.07
   6   8  -1    0.04    0.15
   5  -8  -1    5.21    0.29
  -5  -8   1    5.06    0.43
   5   8  -1    4.85    0.39
   5   8  -1    5.14    0.21
  -5   8   1    5.29    0.41
   5   8  -1    5.57    0.24
  -4  -8   1    0.30    0.15
   4  -8  -1    0.31    0.10
   4   8  -1    0.62    0.08
   4   8  -1    0.34    0.07
  -4   8   1    0.62    0.18
   4   8  -1    0.57    0.16
  -3  -8   1   13.32    0.52
   3  -8  -1   13.94    0.42
   3   8  -1   14.43    0.55
  -3   8   1   13.29    0.53
   3   8  -1   14.30    0.30
   3   8  -1   14.04    0.31
  -2  -8   1   48.47    1.11
   2  -8  -1   49.45    0.84
   2  -8  -1   49.53    1.10
   2  -8  -1   47.63    0.94
  -2  -8   1   50.67    1.05
   2   8  -1   49.27    1.01
  -2   8   1   49.26    0.86
   2   8  -1   48.60    0.78
   2   8  -1   49.51    0.78
   2   8  -1   49.79    1.12
  -2   8   1   49.15    1.06
  -2   8   1   47.88    0.95
   1  -8  -1    2.57    0.17
  -1  -8   1    2.85    0.16
   1  -8  -1    2.25    0.14
   1  -8  -1    2.22    0.14
  -1  -8   1    2.58    0.07
  -1  -8   1    2.60    0.20
  -1   8   1    2.38    0.15
  -1   8   1    2.45    0.13
   1   8  -1    2.63    0.07
   1   8  -1    2.34    0.14
   1   8  -1    2.67    0.20
  -1   8   1    2.35    0.15
   0  -8   1   20.68    0.54
   0  -8   1   20.58    0.39
   0  -8  -1   20.11    0.49
   0  -8   1   20.41    0.48
   0  -8  -1   20.28    0.40
   0  -8  -1   19.76    0.52
   0  -8  -1   20.88    0.41
   0   8  -1   20.42    0.39
   0   8  -1   20.61    0.53
   0   8   1   20.78    0.49
   0   8   1   20.05    0.54
   1  -8   1   42.80    0.87
   1  -8   1   42.76    0.88
  -1  -8  -1   42.38    0.94
  -1  -8  -1   42.37    0.68
  -1  -8  -1   43.42    0.86
   1   8   1   43.37    0.69
  -1   8  -1   42.57    0.79
  -1   8  -1   42.32    0.85
   1   8   1   40.50    0.84
  -1   8  -1   41.68    0.86
   1   8   1   43.06    0.97
  -2  -8  -1    0.64    0.05
  -2  -8  -1    0.61    0.13
   2  -8   1    0.97    0.16
   2  -8   1    0.63    0.11
   2  -8   1    0.66    0.10
  -2  -8  -1    0.59    0.16
   2   8   1    0.90    0.19
  -2   8  -1    0.70    0.14
  -2   8  -1    0.84    0.11
  -2   8  -1    0.98    0.13
   2   8   1    0.73    0.12
   2   8   1    0.73    0.04
  -3  -8  -1    0.78    0.07
  -3  -8  -1    0.91    0.20
   3  -8   1    0.77    0.12
  -3   8  -1    0.80    0.10
  -3   8  -1    0.90    0.11
   3   8   1    0.99    0.21
   3   8   1    0.75    0.06
  -3   8  -1    0.62    0.15
  -4  -8  -1    0.18    0.06
   4  -8   1    0.29    0.10
  -4  -8  -1    0.00    0.12
   4   8   1    0.14    0.05
  -4   8  -1    0.10    0.05
   4   8   1    0.28    0.14
  -4   8  -1    0.16    0.06
  -4   8  -1   -0.05    0.10
  -5  -8  -1    8.78    0.57
  -5  -8  -1    7.76    0.29
   5  -8   1    8.09    0.36
   5   8   1    8.57    0.27
  -5   8  -1    8.27    0.52
   5   8   1    8.18    0.52
  -6  -8  -1    5.80    0.52
   6  -8   1    5.47    0.32
  -6   8  -1    5.96    0.49
   6   8   1    5.68    0.49
   6   8   1    5.39    0.24
  -7  -8  -1   -0.07    0.32
   7  -8   1    0.13    0.11
   7   8   1    0.07    0.08
   7   8   1   -0.06    0.21
   8  -8   1    0.75    0.19
  -8  -8  -1    0.55    0.34
  -8   8  -1    0.43    0.27
   8   8   1    1.03    0.31
   8   8   1    0.99    0.15
   9  -8   1    5.13    0.45
  -9  -8  -1    5.76    0.75
  -9   8  -1    5.70    0.70
   9   8   1    6.16    0.59
   9   8   1    5.44    0.31
  -9  -9   1    2.21    0.51
  -9   9   1    1.26    0.42
   9   9  -1    2.39    0.25
   9   9  -1    2.97    0.46
  -8  -9   1    0.28    0.33
   8  -9  -1   -0.19    0.07
   8   9  -1   -0.09    0.09
   8   9  -1    0.11    0.22
  -8   9   1   -0.16    0.18
  -7  -9   1    0.09    0.24
  -7   9   1    0.16    0.19
   7   9  -1    0.39    0.21
   7   9  -1    0.46    0.10
   6  -9  -1    0.08    0.11
  -6  -9   1    0.06    0.22
   6   9  -1    0.02    0.06
   6   9  -1    0.09    0.15
  -6   9   1   -0.01    0.13
  -5  -9   1   28.70    1.02
   5  -9  -1   28.71    0.77
  -5   9   1   29.45    1.00
   5   9  -1   28.68    0.64
   5   9  -1   29.06    0.61
   4  -9  -1   -0.03    0.06
  -4  -9   1   -0.11    0.10
   4   9  -1    0.01    0.04
   4   9  -1    0.06    0.12
   4   9  -1    0.01    0.04
  -4   9   1    0.10    0.12
   3  -9  -1    1.39    0.16
  -3  -9   1    1.19    0.20
   3   9  -1    1.43    0.07
   3   9  -1    1.54    0.24
  -3   9   1    1.31    0.21
   3   9  -1    1.22    0.07
   2  -9  -1  125.43    2.12
  -2  -9   1  127.00    2.34
   2  -9  -1  121.81    2.02
  -2  -9   1  127.71    2.24
   2  -9  -1  123.55    2.29
   2   9  -1  125.78    1.91
  -2   9   1  126.88    2.05
   2   9  -1  124.83    2.19
  -2   9   1  124.80    2.13
   2   9  -1  123.82    1.91
   2   9  -1  124.35    2.32
  -2   9   1  126.83    2.26
   1  -9  -1    2.30    0.17
   1  -9  -1    2.13    0.15
   1  -9  -1    2.29    0.13
  -1  -9   1    2.37    0.25
  -1  -9   1    2.17    0.07
  -1  -9   1    2.09    0.15
  -1   9   1    2.44    0.14
  -1   9   1    2.50    0.17
  -1   9   1    2.00    0.15
   1   9  -1    2.34    0.07
   1   9  -1    2.42    0.21
   0  -9   1    4.24    0.19
   0  -9  -1    4.05    0.14
   0  -9  -1    4.38    0.20
   0  -9   1    3.72    0.23
   0  -9  -1    4.18    0.14
   0  -9  -1    3.56    0.21
   0  -9   1    3.97    0.13
   0  -9   1    4.16    0.19
   0   9  -1    4.06    0.13
   0   9  -1    3.93    0.23
   1  -9   1   75.49    1.42
  -1  -9  -1   77.01    1.22
  -1  -9  -1   77.28    1.52
   1  -9   1   78.06    1.32
  -1  -9  -1   77.73    1.21
  -1  -9  -1   77.35    1.42
  -1   9  -1   77.94    1.33
  -1   9  -1   76.80    1.41
  -1   9  -1   79.16    1.43
   1   9   1   78.03    1.55
   1   9   1   74.61    1.41
   2  -9   1    0.12    0.07
   2  -9   1    0.08    0.10
  -2  -9  -1   -0.03    0.09
  -2  -9  -1    0.17    0.04
   2  -9   1   -0.12    0.08
  -2  -9  -1    0.13    0.12
  -2   9  -1   -0.03    0.10
  -2   9  -1    0.09    0.08
   2   9   1    0.08    0.02
   2   9   1    0.01    0.14
  -2   9  -1    0.09    0.08
   2   9   1   -0.09    0.06
  -3  -9  -1    2.40    0.10
  -3  -9  -1    2.29    0.23
   3  -9   1    2.50    0.17
   3  -9   1    2.27    0.14
   3   9   1    2.35    0.30
   3   9   1    2.32    0.09
  -3   9  -1    2.25    0.14
  -3   9  -1    2.23    0.22
  -4  -9  -1    0.34    0.16
  -4  -9  -1    0.03    0.04
   4  -9   1    0.11    0.08
  -4   9  -1    0.07    0.04
  -4   9  -1    0.02    0.10
   4   9   1    0.11    0.15
   5  -9   1    0.56    0.13
  -5  -9  -1    0.62    0.24
  -5  -9  -1    0.51    0.10
   5   9   1    0.53    0.08
  -5   9  -1    0.60    0.21
   5   9   1    0.70    0.23
   6  -9   1   17.06    0.59
  -6  -9  -1   16.70    0.85
  -6   9  -1   14.75    0.76
   6   9   1   17.30    0.45
   6   9   1   16.46    0.80
  -7  -9  -1    0.09    0.24
   7  -9   1    0.04    0.11
   7   9   1    0.10    0.08
   7   9   1    0.21    0.20
  -7   9  -1    0.10    0.19
  -8  -9  -1    0.50    0.34
   8  -9   1    0.02    0.11
   8   9   1    0.10    0.24
   8   9   1    0.40    0.11
  -8   9  -1    0.43    0.24
   9  -9   1    0.31    0.18
  -9  -9  -1    0.01    0.29
   9   9   1   -0.22    0.25
   9   9   1    0.56    0.15
  -9   9  -1    0.55    0.31
  -9 -10   1    0.89    0.37
   9 -10  -1    1.71    0.27
  -9  10   1    1.90    0.48
   9  10  -1    1.87    0.38
   8 -10  -1    0.58    0.16
  -8 -10   1    0.15    0.32
   8  10  -1    0.76    0.14
  -8  10   1    0.43    0.26
   8  10  -1    0.58    0.29
   7 -10  -1    0.00    0.11
  -7 -10   1    0.40    0.29
  -7  10   1    0.08    0.18
   7  10  -1    0.00    0.08
   7  10  -1   -0.34    0.12
  -6 -10   1   11.92    0.74
   6 -10  -1   11.40    0.48
   6  10  -1   11.74    0.34
   6  10  -1   11.24    0.64
  -6  10   1   11.75    0.66
   5 -10  -1   26.38    0.74
  -5 -10   1   25.38    0.95
   5  10  -1   25.68    0.54
   5  10  -1   25.63    0.92
   5  10  -1   26.80    0.63
  -5  10   1   26.55    0.96
   4  10  -1    0.05    0.05
   4  10  -1    0.18    0.14
   4  10  -1    0.05    0.03
  -3 -10   1    3.95    0.29
   3 -10  -1    3.53    0.21
   3  10  -1    3.47    0.10
   3  10  -1    3.63    0.11
  -3  10   1    3.28    0.26
   3  10  -1    3.22    0.28
   2 -10  -1   57.16    1.10
  -2 -10   1   59.62    1.22
   2 -10  -1   58.04    1.04
  -2  10   1   58.47    1.06
  -2  10   1   57.05    1.11
  -2  10   1   58.86    1.24
   2  10  -1   57.41    1.30
  -1 -10   1   -0.04    0.06
   1 -10  -1   -0.05    0.08
   1 -10  -1   -0.02    0.07
   1 -10  -1    0.04    0.06
  -1 -10   1    0.02    0.02
  -1 -10   1    0.02    0.12
   1  10  -1    0.04    0.03
   1  10  -1    0.01    0.12
  -1  10   1    0.04    0.07
   1  10  -1    0.01    0.05
  -1  10   1    0.11    0.07
  -1  10   1    0.14    0.09
   0 -10   1   22.08    0.61
   0 -10   1   21.66    0.42
   0 -10  -1   21.41    0.44
   0 -10   1   21.06    0.54
   0 -10  -1   20.57    0.54
   0 -10  -1   21.36    0.54
   0 -10  -1   22.01    0.44
   0 -10   1   21.34    0.54
   0 -10  -1   21.65    0.58
   0  10  -1   21.61    0.43
   0  10  -1   21.47    0.60
   0  10   1   21.85    0.61
   1 -10   1   17.17    0.51
  -1 -10  -1   17.33    0.56
  -1 -10  -1   17.40    0.32
  -1 -10  -1   17.11    0.31
   1 -10   1   17.19    0.51
   1 -10   1   17.52    0.40
  -1 -10  -1   16.76    0.48
   1  10   1   17.18    0.48
  -1  10  -1   17.19    0.48
  -1  10  -1   18.03    0.50
  -1  10  -1   17.57    0.41
   1  10   1   17.59    0.58
   2 -10   1   30.20    0.70
  -2 -10  -1   30.70    0.77
   2 -10   1   30.32    0.82
   2 -10   1   31.27    0.67
  -2  10  -1   31.34    0.69
  -2  10  -1   30.58    0.67
  -2  10  -1   32.06    0.79
   2  10   1   31.07    0.89
   3 -10   1   35.53    0.74
  -3 -10  -1   36.77    0.63
  -3 -10  -1   37.02    0.95
   3 -10   1   36.03    0.80
  -3  10  -1   36.59    0.70
  -3  10  -1   36.56    0.95
   3  10   1   37.61    1.05
   3  10   1   36.77    0.62
  -4 -10  -1   75.46    1.31
   4 -10   1   77.71    1.52
  -4  10  -1   77.31    1.75
   4  10   1   76.91    1.81
   4  10   1   78.71    1.28
   5 -10   1    0.63    0.15
  -5 -10  -1    0.68    0.10
  -5 -10  -1    0.53    0.22
   5  10   1    0.63    0.08
   5  10   1    0.76    0.26
  -5  10  -1    0.55    0.20
  -6 -10  -1    8.32    0.62
   6 -10   1    6.87    0.36
  -6  10  -1    6.71    0.50
   6  10   1    7.38    0.55
   6  10   1    6.91    0.25
   7 -10   1   19.59    0.68
  -7 -10  -1   20.42    1.04
   7  10   1   19.27    0.94
  -7  10  -1   19.26    0.94
   7  10   1   19.86    0.52
   8 -10   1    0.00    0.11
  -8 -10  -1    0.15    0.27
  -8  10  -1   -0.18    0.16
   8  10   1    0.13    0.09
   9 -10   1    1.74    0.27
  -9 -10  -1    1.90    0.47
  -9  10  -1    1.58    0.41
   9  10   1    2.09    0.45
  -9 -11   1    0.11    0.38
   9 -11  -1    0.33    0.16
  -9  11   1    0.33    0.29
   9  11  -1   -0.09    0.26
   8 -11  -1    0.14    0.13
  -8 -11   1   -0.15    0.24
  -8  11   1   -0.26    0.17
   8  11  -1    0.02    0.09
   7 -11  -1    1.62    0.23
  -7 -11   1    2.28    0.49
   7  11  -1    2.10    0.16
   7  11  -1    2.13    0.38
  -7  11   1    1.81    0.35
   6 -11  -1   14.80    0.56
  -6 -11   1   14.01    0.78
   6  11  -1   13.77    0.37
  -6  11   1   13.54    0.73
   6  11  -1   15.13    0.75
   6  11  -1   13.43    0.43
   5 -11  -1    0.38    0.12
  -5 -11   1    0.06    0.19
   5  11  -1    0.30    0.21
   5  11  -1    0.38    0.07
  -5  11   1    0.35    0.16
   5  11  -1    0.27    0.07
  -4 -11   1    0.05    0.12
   4 -11  -1    0.03    0.08
  -4  11   1    0.13    0.12
   4  11  -1    0.10    0.04
   4  11  -1    0.23    0.17
   4  11  -1    0.24    0.05
  -3 -11   1    4.05    0.29
   3 -11  -1    3.88    0.22
  -3  11   1    4.35    0.29
   3  11  -1    4.04    0.09
   3  11  -1    3.72    0.32
   2 -11  -1   12.08    0.34
   2 -11  -1   11.63    0.36
  -2 -11   1   11.19    0.43
  -2  11   1   11.59    0.35
  -2  11   1   10.70    0.36
   2  11  -1   13.31    0.53
  -2  11   1   11.19    0.43
   1 -11  -1    1.09    0.16
   1 -11  -1    1.05    0.16
   1 -11  -1    1.43    0.14
  -1 -11   1    0.99    0.05
  -1 -11   1    0.89    0.14
  -1 -11   1    1.06    0.21
   1  11  -1    0.89    0.13
   1  11  -1    1.14    0.06
  -1  11   1    0.96    0.14
  -1  11   1    1.02    0.16
  -1  11   1    0.87    0.12
   1  11  -1    1.00    0.21
   0 -11   1   27.99    0.66
   0 -11  -1   26.72    0.54
   0 -11  -1   27.82    0.67
   0 -11  -1   26.14    0.78
   0 -11   1   28.15    0.52
   0 -11   1   27.72    0.66
   0 -11  -1   27.52    0.54
   0 -11  -1   27.35    0.67
   0  11  -1   27.47    0.53
   0  11  -1   27.51    0.73
   0  11   1   28.72    0.74
   1 -11   1   16.07    0.50
  -1 -11  -1   15.56    0.29
   1 -11   1   16.04    0.38
  -1 -11  -1   14.82    0.46
  -1 -11  -1   16.15    0.55
   1 -11   1   14.09    0.48
  -1 -11  -1   15.16    0.29
   1  11   1   14.30    0.45
  -1  11  -1   15.42    0.46
  -1  11  -1   15.89    0.48
  -1  11  -1   14.69    0.41
   1  11   1   16.00    0.58
   2 -11   1   81.06    1.47
   2 -11   1   81.39    1.53
  -2 -11  -1   83.88    1.62
  -2  11  -1   84.70    1.49
  -2  11  -1   81.23    1.60
   2  11   1   80.13    1.75
   3 -11   1   59.06    1.18
   3 -11   1   59.28    1.13
  -3 -11  -1   58.38    1.34
  -3 -11  -1   59.10    0.96
  -3  11  -1   59.89    1.07
   3  11   1   59.61    0.94
   3  11   1   60.16    1.47
  -3  11  -1   60.49    1.35
  -4 -11  -1    0.16    0.05
  -4 -11  -1    0.19    0.16
  -4  11  -1    0.08    0.10
   4  11   1    0.04    0.03
  -5 -11  -1    5.73    0.23
   5 -11   1    6.75    0.34
  -5 -11  -1    6.33    0.48
  -5  11  -1    6.43    0.45
   5  11   1    6.16    0.49
   5  11   1    6.60    0.21
  -6 -11  -1   18.16    0.89
   6 -11   1   16.97    0.59
  -6  11  -1   16.47    0.80
   6  11   1   16.51    0.42
   6  11   1   14.91    0.80
   7 -11   1    2.58    0.29
  -7 -11  -1    2.77    0.52
  -7  11  -1    2.64    0.43
   7  11   1    2.97    0.47
   7  11   1    2.73    0.17
  -8 -11  -1    0.73    0.36
   8 -11   1    0.48    0.17
   8  11   1    0.58    0.11
  -8  11  -1    0.15    0.22
   8  11   1    0.35    0.28
  -9 -11  -1    0.37    0.37
   9 -11   1    0.37    0.17
  -9  11  -1    0.44    0.28
   9  11   1    0.87    0.38
  -9 -12   1    2.17    0.52
   9 -12  -1    3.04    0.35
  -9  12   1    2.24    0.46
   9  12  -1    2.58    0.50
  -8 -12   1   -0.06    0.29
   8 -12  -1   -0.03    0.11
   8  12  -1    0.21    0.27
  -8  12   1    0.05    0.21
   7 -12  -1    3.65    0.30
  -7 -12   1    4.84    0.64
   7  12  -1    3.99    0.20
   7  12  -1    3.80    0.49
  -7  12   1    4.10    0.52
  -6 -12   1    7.59    0.59
   6 -12  -1    7.56    0.40
   6  12  -1    7.85    0.57
  -6  12   1    7.01    0.53
   6  12  -1    8.54    0.29
   6  12  -1    7.72    0.25
  -5 -12   1   14.64    0.71
   5 -12  -1   14.93    0.54
   5  12  -1   14.58    0.35
  -5  12   1   14.65    0.69
   5  12  -1   13.91    0.71
   5  12  -1   14.55    0.44
   4 -12  -1    0.16    0.10
  -4 -12   1    0.07    0.14
  -4  12   1    0.12    0.12
   4  12  -1   -0.11    0.13
   4  12  -1    0.18    0.03
   4  12  -1    0.10    0.03
   3 -12  -1    5.73    0.27
   3 -12  -1    5.65    0.18
  -3 -12   1    5.09    0.33
   3  12  -1    5.08    0.37
  -3  12   1    5.58    0.17
  -3  12   1    5.81    0.35
   2 -12  -1   11.79    0.36
   2 -12  -1   12.51    0.38
  -2 -12   1   11.68    0.45
  -2  12   1   12.33    0.38
  -2  12   1   11.18    0.44
   2  12  -1   11.91    0.52
  -1 -12   1   15.19    0.28
   1 -12  -1   14.59    0.39
  -1 -12   1   14.99    0.47
  -1 -12   1   15.25    0.63
   1 -12  -1   15.03    0.46
   1  12  -1   14.42    0.55
  -1  12   1   15.15    0.48
  -1  12   1   15.28    0.49
   1  12  -1   15.17    0.29
   0 -12   1   -0.07    0.13
   0 -12  -1    0.08    0.05
   0 -12  -1    0.04    0.06
   0 -12  -1    0.17    0.08
   0 -12   1    0.22    0.08
   0 -12  -1    0.11    0.07
   0 -12  -1    0.19    0.13
   0 -12   1    0.18    0.08
   0 -12   1    0.09    0.04
   0  12  -1    0.07    0.05
   0  12  -1    0.34    0.15
   0  12   1    0.19    0.14
   1 -12   1    0.08    0.09
   1 -12   1    0.10    0.06
   1 -12   1   -0.20    0.10
  -1 -12  -1    0.00    0.06
  -1 -12  -1    0.03    0.03
  -1 -12  -1    0.00    0.03
  -1 -12  -1    0.16    0.14
  -1  12  -1   -0.03    0.05
   1  12   1    0.07    0.14
  -1  12  -1   -0.01    0.11
  -1  12  -1   -0.02    0.05
   2 -12   1   23.56    0.62
  -2 -12  -1   23.77    0.67
   2 -12   1   23.69    0.56
   2  12   1   23.10    0.78
  -2  12  -1   24.15    0.68
  -2  12  -1   23.19    0.58
   3 -12   1    0.83    0.13
   3 -12   1    0.94    0.12
  -3 -12  -1    0.74    0.17
  -3  12  -1    0.87    0.17
   3  12   1    0.99    0.23
  -3  12  -1    0.79    0.11
  -4 -12  -1    0.74    0.20
   4 -12   1    0.54    0.12
   4  12   1    0.48    0.05
  -4  12  -1    0.77    0.20
   4  12   1    0.47    0.20
   5 -12   1   12.55    0.48
  -5 -12  -1   13.61    0.71
  -5  12  -1   12.77    0.64
   5  12   1   13.10    0.33
   5  12   1   14.04    0.72
  -6 -12  -1   12.08    0.74
   6 -12   1   10.88    0.47
  -6  12  -1   11.07    0.64
   6  12   1    9.63    0.66
   6  12   1   10.23    0.34
   6  12   1   10.19    0.30
  -7 -12  -1    5.49    0.66
   7 -12   1    5.59    0.37
   7  12   1    4.85    0.51
  -7  12  -1    5.74    0.52
   7  12   1    5.25    0.23
  -8 -12  -1    3.69    0.62
   8 -12   1    3.36    0.37
   8  12   1    3.93    0.24
  -8  12  -1    2.94    0.45
   8  12   1    3.63    0.55
  -9 -12  -1    0.37    0.41
   9 -12   1    0.61    0.18
  -9  12  -1    1.36    0.37
   9  12   1    1.05    0.41
   9 -13  -1    0.17    0.16
  -9 -13   1    0.01    0.39
  -9  13   1    0.15    0.28
   9  13  -1    0.02    0.30
   8 -13  -1    4.64    0.38
  -8 -13   1    4.62    0.68
   8  13  -1    4.66    0.61
  -8  13   1    4.52    0.59
   7 -13  -1    1.43    0.24
  -7 -13   1    1.35    0.41
   7  13  -1    1.59    0.13
  -7  13   1    1.59    0.33
   7  13  -1    1.30    0.35
  -6 -13   1    0.48    0.24
   6 -13  -1    0.50    0.15
   6  13  -1    0.77    0.09
  -6  13   1    0.38    0.20
   6  13  -1    0.44    0.22
  -5 -13   1    0.17    0.17
   5 -13  -1    0.07    0.10
   5  13  -1    0.26    0.19
  -5  13   1    0.14    0.14
   5  13  -1    0.23    0.05
   5  13  -1    0.28    0.05
   4 -13  -1    0.89    0.16
  -4 -13   1    0.89    0.22
   4  13  -1    0.76    0.25
  -4  13   1    1.00    0.20
   3 -13  -1   35.34    0.82
   3 -13  -1   34.79    0.68
  -3 -13   1   35.16    0.96
  -3  13   1   35.18    0.68
  -3  13   1   34.67    0.96
   3  13  -1   35.14    1.05
   2 -13  -1   19.25    0.51
  -2 -13   1   17.90    0.58
   2 -13  -1   18.88    0.50
  -2  13   1   18.95    0.60
   2  13  -1   18.78    0.68
  -2  13   1   18.47    0.51
   1 -13  -1    7.37    0.26
  -1 -13   1    7.85    0.17
   1 -13  -1    7.13    0.33
  -1 -13   1    7.79    0.34
   1  13  -1    7.99    0.41
  -1  13   1    7.61    0.35
  -1  13   1    7.17    0.32
   1  13  -1    7.75    0.18
  -1  13   1    7.46    0.26
   0 -13  -1   -0.03    0.04
   0 -13  -1    0.02    0.07
   0 -13   1   -0.03    0.05
   0 -13  -1    0.05    0.05
   0 -13  -1   -0.10    0.10
   0 -13   1    0.00    0.04
   0 -13   1   -0.08    0.12
   0  13  -1    0.02    0.05
   0  13   1    0.03    0.11
   0  13  -1   -0.04    0.10
  -1 -13  -1   16.89    0.32
   1 -13   1   16.62    0.41
  -1 -13  -1   17.11    0.33
  -1 -13  -1   17.58    0.53
  -1  13  -1   17.28    0.44
   1  13   1   16.98    0.63
  -1  13  -1   16.85    0.52
  -1  13  -1   16.97    0.53
   2 -13   1    7.11    0.33
  -2 -13  -1    6.68    0.34
   2 -13   1    7.17    0.27
   2  13   1    6.89    0.42
  -2  13  -1    6.62    0.33
   3 -13   1   29.14    0.70
  -3 -13  -1   28.97    0.85
   3 -13   1   29.02    0.71
   3  13   1   29.05    0.97
  -3  13  -1   29.53    0.64
  -3  13  -1   29.07    0.85
   4 -13   1   32.26    0.81
  -4 -13  -1   31.62    0.99
   4  13   1   32.23    1.09
   4  13   1   31.10    0.54
   4  13   1   31.60    0.53
  -4  13  -1   31.95    0.97
  -5 -13  -1   26.46    0.99
   5 -13   1   27.85    0.77
  -5  13  -1   26.84    0.95
   5  13   1   26.09    0.50
   5  13   1   26.31    1.05
   5  13   1   25.72    0.53
   6 -13   1   28.74    0.84
  -6 -13  -1   29.50    1.16
   6  13   1   27.74    0.62
  -6  13  -1   28.43    1.06
   6  13   1   28.98    1.16
   6  13   1   29.61    0.58
  -7 -13  -1    0.12    0.28
   7 -13   1    0.18    0.11
   7  13   1    0.26    0.20
   7  13   1    0.03    0.06
  -7  13  -1    0.12    0.15
  -8 -13  -1    1.54    0.46
   8 -13   1    2.00    0.27
  -8  13  -1    1.53    0.34
   8  13   1    1.63    0.38
  -8 -14   1    0.19    0.28
   8 -14  -1    0.70    0.19
   8  14  -1    0.62    0.29
  -8  14   1    0.13    0.21
   7 -14  -1    2.27    0.29
  -7 -14   1    2.66    0.51
   7  14  -1    2.61    0.14
  -7  14   1    1.90    0.35
  -6 -14   1    5.02    0.51
   6 -14  -1    5.26    0.34
   6  14  -1    5.53    0.20
   6  14  -1    5.18    0.48
  -6  14   1    5.36    0.45
   5 -14  -1    5.69    0.34
  -5 -14   1    5.91    0.49
   5  14  -1    6.16    0.15
   5  14  -1    5.68    0.14
   5  14  -1    5.88    0.49
  -5  14   1    5.92    0.43
  -4 -14   1    8.86    0.51
   4 -14  -1   10.36    0.42
  -4  14   1    9.22    0.50
   4  14  -1    8.97    0.56
   3 -14  -1    8.47    0.28
   3 -14  -1    8.85    0.35
  -3  14   1    8.26    0.28
   2 -14  -1    0.79    0.12
  -2 -14   1    0.89    0.17
   2 -14  -1    1.05    0.15
   2  14  -1    1.10    0.23
  -2  14   1    0.90    0.16
   1 -14  -1   95.82    1.64
  -1 -14   1   92.73    1.79
  -1 -14   1   96.93    1.49
   1 -14  -1   92.10    1.77
  -1  14   1   93.28    1.65
   1  14  -1   94.14    1.51
  -1  14   1   93.74    1.80
   1  14  -1   95.51    1.95
  -1  14   1   93.55    1.81
   0 -14  -1    0.22    0.06
   0 -14  -1    0.29    0.10
   0 -14   1    0.35    0.16
   0 -14   1    0.32    0.10
   0 -14  -1    0.35    0.07
   0 -14  -1    0.25    0.14
   0  14  -1    0.23    0.06
   0  14  -1    0.18    0.15
   0  14   1    0.37    0.15
  -1 -14  -1    2.31    0.09
   1 -14   1    2.33    0.14
   1 -14   1    2.55    0.24
  -1 -14  -1    2.41    0.09
  -1 -14  -1    2.42    0.20
   1  14   1    2.39    0.29
  -1  14  -1    2.56    0.23
  -1  14  -1    2.34    0.14
  -1  14  -1    2.44    0.20
  -2 -14  -1   76.16    1.57
   2 -14   1   74.15    1.50
   2 -14   1   76.62    1.40
  -2  14  -1   75.06    1.46
   2  14   1   78.03    1.76
  -2  14  -1   74.88    1.55
   3 -14   1    8.66    0.35
   3 -14   1    9.44    0.36
   3  14   1    9.00    0.62
  -3  14  -1    8.69    0.44
  -3  14  -1    9.50    0.32
  -4 -14  -1    0.53    0.20
   4 -14   1    0.58    0.14
  -4  14  -1    0.58    0.07
  -4  14  -1    0.54    0.17
  -4  14  -1    0.57    0.07
   4  14   1    0.66    0.24
  -5 -14  -1    1.02    0.28
   5 -14   1    1.46    0.21
  -5  14  -1    1.26    0.26
   5  14   1    1.59    0.33
   5  14   1    1.38    0.09
   5  14   1    1.29    0.07
  -6 -14  -1    3.36    0.50
   6 -14   1    3.23    0.28
   6  14   1    3.76    0.14
   6  14   1    3.72    0.17
  -6  14  -1    3.57    0.44
   6  14   1    3.74    0.53
   7 -14   1    0.59    0.18
  -7 -14  -1   -0.36    0.21
  -7  14  -1    0.49    0.25
   7  14   1    0.77    0.28
   7  14   1    0.58    0.09
   8 -14   1    2.67    0.32
  -8 -14  -1    3.15    0.53
   8  14   1    3.49    0.58
  -8  14  -1    2.77    0.45
   8 -15  -1    0.65    0.16
  -8 -15   1    0.38    0.31
   8  15  -1    0.19    0.30
  -8  15   1    0.76    0.27
  -7 -15   1    1.46    0.41
   7 -15  -1    1.44    0.23
  -7  15   1    2.00    0.38
   7  15  -1    1.55    0.42
   7  15  -1    1.68    0.11
   6  15  -1   -0.02    0.18
  -6  15   1    0.04    0.15
   6  15  -1    0.10    0.04
   6  15  -1    0.11    0.05
   5 -15  -1   23.64    0.72
  -5 -15   1   24.34    0.95
  -5  15   1   23.24    0.90
   5  15  -1   23.30    0.97
   4 -15  -1   62.21    1.32
  -4 -15   1   60.16    1.53
  -4  15   1   60.65    1.52
   4  15  -1   63.53    1.66
   3 -15  -1    7.81    0.29
  -3 -15   1    7.92    0.43
   3 -15  -1    8.86    0.36
   3  15  -1    8.30    0.73
  -3  15   1    9.01    0.44
  -3  15   1    8.45    0.30
  -2 -15   1    2.22    0.21
   2 -15  -1    2.51    0.21
   2 -15  -1    2.35    0.17
  -2  15   1    2.31    0.20
  -2  15   1    2.11    0.20
   2  15  -1    2.42    0.31
  -1 -15   1   35.87    0.60
  -1 -15   1   33.97    0.86
   1 -15  -1   34.77    0.73
   1 -15  -1   34.46    0.86
  -1  15   1   34.56    0.89
  -1  15   1   34.63    0.87
  -1  15   1   34.44    0.74
   1  15  -1   34.53    0.98
   1  15  -1   34.40    0.61
   0 -15  -1    1.69    0.11
   0 -15   1    1.76    0.10
   0 -15   1    1.62    0.17
   0 -15  -1    1.78    0.12
   0 -15  -1    1.99    0.18
   0  15  -1    2.15    0.26
   0  15   1    1.76    0.24
   0  15  -1    1.82    0.12
  -1 -15  -1   26.30    0.49
   1 -15   1   27.10    0.59
  -1 -15  -1   27.02    0.48
  -1 -15  -1   27.30    0.74
   1 -15   1   25.94    0.76
  -1  15  -1   27.05    0.73
   1  15   1   26.12    0.85
  -1  15  -1   25.78    0.61
  -1  15  -1   26.93    0.74
   2 -15   1    6.56    0.37
  -2 -15  -1    6.40    0.34
   2 -15   1    5.97    0.26
   2  15   1    6.74    0.44
  -2  15  -1    6.10    0.34
  -2  15  -1    6.55    0.31
   3 -15   1    0.45    0.11
  -3 -15  -1    0.36    0.15
   3  15   1    0.36    0.20
  -3  15  -1    0.26    0.09
  -3  15  -1    0.37    0.13
   4 -15   1    2.16    0.20
  -4 -15  -1    2.15    0.31
  -4  15  -1    1.84    0.12
  -4  15  -1    1.78    0.27
   4  15   1    2.37    0.38
  -5 -15  -1    1.29    0.32
   5 -15   1    1.37    0.20
  -5  15  -1    1.55    0.28
   5  15   1    1.30    0.32
   6 -15   1    0.65    0.19
   6  15   1    0.92    0.09
  -6  15  -1    0.64    0.23
   6  15   1    0.87    0.07
   6  15   1    1.21    0.32
   7 -15   1   -0.01    0.11
  -7 -15  -1    0.24    0.25
   7  15   1    0.04    0.06
  -7  15  -1    0.05    0.18
   7  15   1    0.08    0.21
  -8 -15  -1    1.77    0.46
   8 -15   1    1.94    0.27
   8  15   1    2.41    0.49
  -8  15  -1    2.48    0.43
   8 -16  -1    0.37    0.27
  -8 -16   1    1.36    0.65
   8  16  -1    0.20    0.27
  -8  16   1    0.30    0.27
  -7 -16   1    0.02    0.24
   7 -16  -1    0.03    0.10
   7  16  -1   -0.17    0.19
  -7  16   1    0.24    0.21
  -6 -16   1    1.15    0.31
   6 -16  -1    1.21    0.21
   6  16  -1    1.26    0.34
  -6  16   1    1.07    0.26
  -5 -16   1    0.65    0.24
   5 -16  -1    0.97    0.18
   5  16  -1    0.79    0.26
  -5  16   1    0.95    0.23
   4 -16  -1    5.20    0.31
  -4 -16   1    6.27    0.45
   4  16  -1    6.02    0.48
  -4  16   1    6.16    0.41
  -3 -16   1   14.13    0.59
   3 -16  -1   14.06    0.48
   3 -16  -1   13.28    0.41
  -3  16   1   13.34    0.56
   3  16  -1   14.34    0.68
  -3  16   1   13.79    0.43
  -2 -16   1    0.18    0.11
   2 -16  -1    0.22    0.11
   2 -16  -1    0.04    0.06
  -2  16   1    0.16    0.11
   2  16  -1    0.14    0.14
  -2  16   1    0.18    0.10
  -1 -16   1   36.59    0.63
  -1 -16   1   37.12    0.92
   1 -16  -1   36.89    0.77
   1 -16  -1   36.11    0.92
   1  16  -1   36.40    0.65
  -1  16   1   35.36    0.77
  -1  16   1   37.48    0.96
   1  16  -1   36.16    1.04
  -1  16   1   35.84    0.91
   0 -16   1   14.04    0.33
   0 -16  -1   13.39    0.34
   0 -16   1   14.36    0.50
   0 -16  -1   12.76    0.35
   0 -16  -1   13.27    0.49
   0  16   1   13.64    0.56
   0  16  -1   14.11    0.56
   0  16  -1   13.62    0.35
   1 -16   1   -0.18    0.08
  -1 -16  -1    0.01    0.07
  -1 -16  -1    0.03    0.03
   1 -16   1    0.00    0.04
  -1 -16  -1   -0.03    0.02
   1  16   1    0.14    0.14
  -1  16  -1   -0.11    0.05
  -1  16  -1    0.03    0.07
  -1  16  -1    0.13    0.12
   2 -16   1    5.69    0.25
  -2 -16  -1    5.10    0.37
   2 -16   1    6.14    0.32
  -2  16  -1    6.06    0.31
  -2  16  -1    5.32    0.32
   2  16   1    4.91    0.44
  -3 -16  -1    4.45    0.35
   3 -16   1    4.35    0.27
   3 -16   1    5.10    0.26
  -3  16  -1    4.48    0.28
   3  16   1    4.58    0.42
  -3  16  -1    4.75    0.33
   4 -16   1    5.16    0.30
  -4 -16  -1    4.80    0.40
   4 -16   1    5.49    0.22
  -4  16  -1    5.44    0.20
  -4  16  -1    5.18    0.37
   4  16   1    5.74    0.49
  -5 -16  -1    1.13    0.27
   5 -16   1    1.41    0.21
  -5  16  -1    1.21    0.27
   5  16   1    1.32    0.36
   6 -16   1    0.10    0.09
  -6 -16  -1    0.52    0.28
   6  16   1    0.22    0.22
  -6  16  -1    0.54    0.23
   7 -16   1    0.35    0.14
  -7 -16  -1    0.56    0.30
  -7  16  -1    0.70    0.23
   7  16   1    0.74    0.32
   8 -16   1    0.15    0.14
   8  16   1    0.45    0.31
  -8  16  -1   -0.02    0.19
  -8 -17   1    0.38    0.40
   8 -17  -1    0.71    0.20
   8  17  -1    0.91    0.41
  -8  17   1    0.72    0.31
  -7 -17   1    3.21    0.54
   7 -17  -1    3.50    0.31
  -7  17   1    3.38    0.46
   7  17  -1    2.65    0.49
   6 -17  -1    2.75    0.27
  -6 -17   1    1.99    0.39
  -6  17   1    2.28    0.37
   5 -17  -1   19.42    0.65
  -5 -17   1   18.64    0.85
   5  17  -1   17.24    0.87
  -5  17   1   17.83    0.79
   4 -17  -1   -0.06    0.09
  -4 -17   1    0.07    0.14
  -4  17   1   -0.01    0.13
   4  17  -1   -0.05    0.16
   3 -17  -1    0.75    0.14
   3 -17  -1    1.18    0.16
  -3 -17   1    0.61    0.17
  -3  17   1    1.00    0.16
   3  17  -1    0.65    0.23
  -3  17   1    0.90    0.20
   2 -17  -1    2.75    0.24
   2 -17  -1    3.12    0.20
  -2 -17   1    2.72    0.26
   2  17  -1    3.08    0.33
  -2  17   1    2.88    0.25
  -2  17   1    2.57    0.23
  -1 -17   1    8.42    0.20
   1 -17  -1    8.77    0.30
  -1 -17   1    8.60    0.40
   1  17  -1    8.13    0.21
  -1  17   1    8.36    0.42
   1  17  -1    8.38    0.47
  -1  17   1    8.60    0.40
   0 -17  -1    7.10    0.25
   0 -17  -1    7.78    0.24
   0 -17   1    7.47    0.23
   0 -17   1    8.15    0.38
   0 -17  -1    7.92    0.38
   0  17  -1    7.34    0.41
   0  17  -1    7.12    0.25
   0  17   1    7.78    0.43
   1 -17   1    6.93    0.25
  -1 -17  -1    7.30    0.37
  -1 -17  -1    7.31    0.19
  -1 -17  -1    7.12    0.18
   1  17   1    7.06    0.45
  -1  17  -1    7.50    0.37
  -1  17  -1    6.93    0.38
   2 -17   1    8.99    0.43
  -2 -17  -1    9.41    0.45
   2 -17   1    9.33    0.34
   2  17   1    9.65    0.57
  -2  17  -1    9.66    0.41
  -2  17  -1    9.44    0.44
  -3 -17  -1    0.18    0.14
   3 -17   1    0.46    0.12
   3 -17   1    0.53    0.15
   3  17   1    0.45    0.22
  -3  17  -1    0.44    0.14
  -3  17  -1    0.18    0.10
   4 -17   1    3.88    0.21
   4 -17   1    4.45    0.27
  -4 -17  -1    4.28    0.39
   4  17   1    3.25    0.45
  -4  17  -1    3.64    0.32
  -4  17  -1    4.22    0.19
  -5 -17  -1    0.09    0.18
   5 -17   1    0.22    0.13
   5  17   1    0.12    0.21
  -5  17  -1    0.15    0.14
  -6 -17  -1    8.92    0.65
   6 -17   1    9.29    0.46
   6  17   1    8.62    0.68
  -6  17  -1    8.62    0.57
   7 -17   1    9.54    0.49
  -7 -17  -1    9.60    0.74
  -7  17  -1    9.57    0.64
   7  17   1    8.94    0.72
  -8 -17  -1   -0.18    0.35
   8 -17   1   -0.05    0.13
   8  17   1    0.07    0.32
  -8  17  -1    0.10    0.21
  -8 -18   1    2.85    0.59
   8 -18  -1    3.50    0.38
   8  18  -1    3.20    0.56
  -8  18   1    3.26    0.51
   7 -18  -1    0.03    0.13
  -7 -18   1    0.41    0.26
   7  18  -1   -0.44    0.23
  -7  18   1   -0.07    0.16
  -6 -18   1   -0.11    0.20
   6 -18  -1   -0.02    0.08
   6  18  -1    0.13    0.20
  -6  18   1    0.09    0.16
   5 -18  -1   17.03    0.62
  -5 -18   1   17.20    0.81
  -5  18   1   16.12    0.74
   5  18  -1   17.66    0.89
   4 -18  -1   69.31    1.47
  -4 -18   1   72.27    1.76
  -4  18   1   67.55    1.67
   4  18  -1   69.64    1.87
   3 -18  -1    0.70    0.14
   3 -18  -1    0.71    0.14
  -3 -18   1    0.63    0.18
  -3  18   1    0.61    0.17
  -3  18   1    0.57    0.13
   3  18  -1    0.61    0.21
   2 -18  -1    2.60    0.19
   2 -18  -1    2.53    0.24
  -2 -18   1    3.30    0.28
  -2  18   1    2.88    0.26
   2  18  -1    2.63    0.36
  -2  18   1    2.74    0.24
  -1 -18   1    8.94    0.22
  -1 -18   1    9.80    0.44
   1 -18  -1    9.34    0.32
   1  18  -1    9.10    0.24
  -1  18   1    9.88    0.48
   1  18  -1    9.01    0.50
  -1  18   1    9.83    0.44
   0 -18  -1    0.54    0.08
   0 -18   1    0.53    0.07
   0 -18  -1    0.43    0.13
   0  18   1    0.79    0.21
   0  18  -1    0.59    0.10
   0  18  -1    0.60    0.19
   1 -18   1    9.81    0.31
  -1 -18  -1    9.61    0.68
  -1 -18  -1    8.95    0.23
  -1 -18  -1    9.55    0.22
   1  18   1    8.96    0.53
  -1  18  -1    9.25    0.45
  -1  18  -1    9.31    0.43
  -2 -18  -1    3.30    0.27
   2 -18   1    3.50    0.20
   2 -18   1    3.14    0.28
  -2  18  -1    3.41    0.27
  -2  18  -1    4.17    0.29
   2  18   1    3.37    0.37
   3 -18   1    5.72    0.29
  -3 -18  -1    5.49    0.39
  -3  18  -1    5.21    0.29
   3  18   1    4.79    0.44
  -3  18  -1    5.30    0.35
   4 -18   1    0.67    0.15
  -4 -18  -1    0.80    0.23
   4 -18   1    0.89    0.14
  -4  18  -1    0.91    0.20
  -4  18  -1    0.85    0.12
   4  18   1    0.91    0.29
  -5 -18  -1    0.48    0.23
   5 -18   1    0.47    0.14
   5  18   1    0.29    0.21
  -5  18  -1    0.42    0.15
   6 -18   1    0.72    0.18
  -6 -18  -1    1.06    0.32
  -6  18  -1    0.76    0.23
   6  18   1    1.07    0.33
  -7 -18  -1    1.50    0.42
   7 -18   1    1.42    0.25
   7  18   1    1.60    0.41
  -7  18  -1    1.46    0.33
  -8 -18  -1   -0.17    0.33
   8 -18   1    0.18    0.15
   8  18   1    0.06    0.32
  -8  18  -1    0.10    0.20
   8 -19  -1    0.19    0.16
  -8 -19   1   -0.26    0.33
   8  19  -1   -0.42    0.25
  -8  19   1   -0.10    0.23
   7 -19  -1    2.08    0.28
  -7 -19   1    2.00    0.44
  -7  19   1    2.44    0.40
   7  19  -1    2.49    0.50
  -6 -19   1    0.60    0.31
   6 -19  -1    0.40    0.16
  -6  19   1    0.45    0.21
   6  19  -1    0.67    0.29
   5 -19  -1    0.97    0.17
  -5 -19   1    1.45    0.34
  -5  19   1    0.81    0.21
   5  19  -1    1.02    0.32
  -4 -19   1    0.64    0.21
   4 -19  -1    0.84    0.16
   4  19  -1    0.87    0.27
  -4  19   1    0.69    0.19
   3 -19  -1    1.00    0.16
  -3 -19   1    1.62    0.28
   3 -19  -1    1.07    0.18
   3  19  -1    0.62    0.24
  -3  19   1    1.11    0.21
  -3  19   1    1.04    0.18
   2 -19  -1   -0.02    0.06
  -2 -19   1    0.01    0.09
   2 -19  -1    0.02    0.12
  -2  19   1    0.08    0.10
   2  19  -1    0.12    0.17
  -2  19   1   -0.01    0.12
  -1 -19   1   11.51    0.50
  -1 -19   1   12.51    0.28
   1 -19  -1   13.16    0.39
   1  19  -1   13.13    0.64
  -1  19   1   12.77    0.52
  -1  19   1   12.83    0.56
   0 -19   1    3.04    0.25
   0 -19   1    3.76    0.16
   0 -19  -1    3.88    0.19
   0 -19  -1    3.78    0.17
   0 -19  -1    3.87    0.28
   0  19  -1    3.80    0.35
   0  19  -1    3.71    0.19
   0  19   1    3.80    0.35
  -1 -19  -1   32.98    0.59
   1 -19   1   32.85    0.71
  -1 -19  -1   32.87    0.61
  -1 -19  -1   32.56    0.92
  -1  19  -1   33.18    0.95
  -1  19  -1   33.19    0.91
   1  19   1   33.22    1.07
   2 -19   1    0.12    0.07
  -2 -19  -1    0.19    0.12
  -2  19  -1    0.07    0.10
   2  19   1   -0.07    0.15
  -2  19  -1    0.24    0.15
  -3 -19  -1    0.19    0.14
   3 -19   1    0.15    0.13
   3 -19   1    0.14    0.10
  -3  19  -1    0.03    0.12
   3  19   1    0.21    0.22
  -3  19  -1    0.37    0.13
   4 -19   1    1.78    0.22
   4 -19   1    2.01    0.18
  -4 -19  -1    1.55    0.29
  -4  19  -1    1.46    0.16
   4  19   1    2.57    0.43
  -4  19  -1    2.01    0.30
   5 -19   1    1.43    0.21
  -5 -19  -1    1.65    0.37
  -5  19  -1    2.11    0.33
   5  19   1    1.45    0.33
   6 -19   1    1.16    0.21
  -6 -19  -1    1.62    0.37
  -6  19  -1    1.70    0.32
   6  19   1    1.58    0.39
  -7 -19  -1    0.57    0.29
   7 -19   1    0.54    0.19
   7  19   1    0.70    0.38
  -7  19  -1    0.71    0.23
  -8 -19  -1   -0.03    0.34
   8 -19   1    0.47    0.18
  -8  19  -1    0.06    0.25
   8 -20  -1    0.72    0.22
  -8 -20   1    0.78    0.38
   8  20  -1   -0.16    0.34
  -8  20   1    0.78    0.30
   7 -20  -1    0.84    0.21
  -7 -20   1    0.10    0.31
  -7  20   1    0.35    0.23
   7  20  -1    0.62    0.33
  -6 -20   1    0.50    0.24
   6 -20  -1    0.35    0.14
   6  20  -1    0.76    0.29
  -6  20   1    0.39    0.21
   5 -20  -1    3.21    0.28
  -5 -20   1    3.15    0.45
   5  20  -1    3.81    0.63
  -5  20   1    2.73    0.38
   4 -20  -1   10.19    0.44
   4 -20  -1    9.58    0.29
  -4 -20   1   10.53    0.61
   4  20  -1    9.73    0.66
  -4  20   1    9.86    0.55
   3 -20  -1   16.56    0.54
   3 -20  -1   16.16    0.54
  -3 -20   1   15.39    0.68
  -3  20   1   17.20    0.68
  -3  20   1   16.68    0.57
   3  20  -1   16.17    0.80
  -2 -20   1    1.06    0.21
   2 -20  -1    1.27    0.17
  -2  20   1    1.20    0.23
   2  20  -1    1.10    0.30
  -2  20   1    0.93    0.19
  -1 -20   1    0.05    0.03
   1 -20  -1    0.12    0.07
  -1 -20   1    0.07    0.09
  -1  20   1    0.05    0.14
   1  20  -1    0.17    0.17
   0 -20  -1    3.19    0.15
   0 -20   1    3.10    0.27
   0 -20  -1    3.09    0.26
   0 -20  -1    2.57    0.16
   0 -20   1    3.07    0.15
   0  20  -1    2.82    0.35
   0  20   1    3.37    0.40
   0  20  -1    2.95    0.17
  -1 -20  -1    3.26    0.12
   1 -20   1    3.26    0.18
  -1 -20  -1    3.14    0.13
  -1 -20  -1    3.37    0.28
  -1  20  -1    3.34    0.32
   1  20   1    3.94    0.39
   2 -20   1   13.47    0.50
  -2 -20  -1   14.54    0.60
  -2  20  -1   14.66    0.59
   2  20   1   13.80    0.73
  -2  20  -1   14.16    0.57
   3 -20   1    0.11    0.09
   3 -20   1    0.21    0.13
  -3 -20  -1    0.06    0.13
   3  20   1    0.08    0.19
  -3  20  -1    0.22    0.14
  -3  20  -1    0.04    0.11
   4 -20   1    3.44    0.25
   4 -20   1    3.14    0.24
  -4 -20  -1    3.14    0.39
  -4  20  -1    3.07    0.30
   4  20   1    3.16    0.48
  -4  20  -1    3.46    0.21
  -5 -20  -1    4.23    0.45
  -5  20  -1    4.77    0.50
   5  20   1    4.28    0.55
  -6 -20  -1    0.05    0.20
   6 -20   1    0.09    0.11
   6  20   1    0.26    0.30
  -6  20  -1   -0.15    0.13
   7 -20   1    1.45    0.24
  -7 -20  -1    1.74    0.42
   7  20   1    1.67    0.44
  -7  20  -1    2.19    0.38
   7 -21  -1    0.14    0.13
  -7 -21   1    0.21    0.29
  -7  21   1    0.33    0.22
   7  21  -1    0.17    0.30
  -6 -21   1    1.52    0.37
   6 -21  -1    1.35    0.23
  -6  21   1    1.29    0.29
   6  21  -1    0.91    0.34
  -5 -21   1    6.51    0.54
   5 -21  -1    6.35    0.37
   5  21  -1    7.21    0.61
  -5  21   1    6.91    0.49
   4 -21  -1    0.52    0.15
  -4 -21   1    0.94    0.25
   4 -21  -1    0.59    0.11
   4  21  -1    0.84    0.28
  -4  21   1    0.28    0.15
   3 -21  -1    3.51    0.24
  -3 -21   1    3.47    0.35
   3 -21  -1    3.90    0.28
  -3  21   1    2.85    0.30
  -3  21   1    3.52    0.29
   3  21  -1    3.94    0.42
   2 -21  -1   46.64    1.11
  -2 -21   1   45.59    1.22
  -2  21   1   45.58    1.18
   2  21  -1   46.44    1.41
  -2  21   1   45.74    1.21
  -1 -21   1   45.45    1.17
  -1 -21   1   43.25    0.81
   1 -21  -1   45.43    0.93
  -1 -21   1   45.19    0.78
   1  21  -1   46.29    1.34
  -1  21   1   44.95    1.23
   0 -21  -1    0.43    0.08
   0 -21  -1    0.45    0.09
   0 -21   1    0.51    0.08
   0 -21   1    0.26    0.12
   0 -21  -1    0.62    0.16
   0  21  -1    0.72    0.21
   0  21   1    0.32    0.19
   0  21  -1    0.34    0.09
  -1 -21  -1    7.46    0.42
   1 -21   1    7.66    0.29
   1 -21   1    7.38    0.41
  -1 -21  -1    7.43    0.21
  -1 -21  -1    7.28    0.19
   1  21   1    7.55    0.54
  -1  21  -1    7.82    0.47
  -2 -21  -1   54.69    1.36
   2 -21   1   54.19    1.11
  -2  21  -1   52.76    1.29
  -2  21  -1   51.82    1.31
   2  21   1   51.76    1.55
  -3 -21  -1   -0.01    0.12
   3 -21   1    0.17    0.09
   3 -21   1    0.33    0.16
  -3  21  -1    0.19    0.13
  -3  21  -1    0.13    0.13
   3  21   1   -0.08    0.18
   4 -21   1    1.99    0.21
  -4 -21  -1    2.27    0.34
   4 -21   1    2.72    0.24
  -4  21  -1    2.34    0.32
   4  21   1    2.36    0.43
   5 -21   1    1.61    0.23
  -5 -21  -1    1.24    0.30
  -5  21  -1    1.38    0.26
   5  21   1    1.71    0.39
   6 -21   1    0.12    0.12
  -6 -21  -1   -0.42    0.16
   6  21   1   -0.01    0.23
  -6  21  -1    0.01    0.15
  -7 -21  -1    0.32    0.37
   7 -21   1    1.00    0.24
   7  21   1    0.89    0.38
  -7  21  -1    1.16    0.30
  -7 -22   1    3.10    0.60
   7  22  -1    3.26    0.57
  -7  22   1    3.03    0.53
   6 -22  -1    0.89    0.20
  -6 -22   1    0.90    0.29
   6  22  -1    0.69    0.34
  -6  22   1    0.53    0.21
   5 -22  -1   -0.02    0.10
  -5 -22   1    0.22    0.19
  -5  22   1    0.02    0.13
   5  22  -1    0.31    0.23
   4 -22  -1   11.90    0.50
  -4 -22   1   11.10    0.65
   4 -22  -1   12.25    0.39
  -4  22   1   11.69    0.39
   4  22  -1   12.43    0.78
  -4  22   1   11.99    0.63
  -3 -22   1    4.22    0.37
   3 -22  -1    4.05    0.27
   3 -22  -1    4.41    0.31
  -3  22   1    4.10    0.31
   3  22  -1    4.02    0.52
  -3  22   1    3.84    0.35
  -2 -22   1    4.92    0.38
   2 -22  -1    4.93    0.27
  -2  22   1    4.35    0.36
  -2  22   1    4.46    0.34
   2  22  -1    4.34    0.45
  -1 -22   1    0.51    0.14
   1 -22  -1    0.39    0.09
  -1 -22   1    0.35    0.05
  -1 -22   1    0.44    0.07
   1 -22  -1    0.56    0.16
  -1  22   1    0.56    0.20
   1  22  -1    0.63    0.26
   0 -22   1    0.85    0.10
   0 -22  -1    0.76    0.11
   0 -22  -1    0.75    0.12
   0 -22  -1    0.70    0.18
   0 -22   1    0.63    0.17
   0  22  -1    1.09    0.26
   0  22   1    0.57    0.23
   0  22  -1    0.71    0.12
   1 -22   1    2.08    0.28
  -1 -22  -1    1.45    0.08
  -1 -22  -1    1.22    0.09
  -1 -22  -1    1.13    0.22
   1 -22   1    1.30    0.14
   1  22   1    1.74    0.34
  -1  22  -1    1.42    0.29
   2 -22   1    4.44    0.25
  -2 -22  -1    4.15    0.34
  -2  22  -1    4.53    0.35
  -2  22  -1    4.00    0.32
   2  22   1    3.63    0.47
   3 -22   1    0.22    0.10
  -3 -22  -1    0.17    0.16
   3  22   1    0.20    0.23
  -3  22  -1    0.04    0.15
  -3  22  -1    0.03    0.11
  -4 -22  -1    1.11    0.32
   4 -22   1    1.24    0.20
   4 -22   1    1.29    0.20
  -4  22  -1    1.54    0.28
  -4  22  -1    1.20    0.17
  -5 -22  -1    0.58    0.25
   5 -22   1    0.60    0.15
   5  22   1    0.51    0.26
  -5  22  -1    0.29    0.18
  -6 -22  -1    1.77    0.38
   6 -22   1    1.33    0.22
   6  22   1    1.69    0.42
  -6  22  -1    1.92    0.35
  -7 -22  -1    0.86    0.37
   7 -22   1    1.27    0.24
  -7  22  -1    1.24    0.36
   7 -23  -1    0.68    0.20
  -7 -23   1    0.84    0.35
   7  23  -1    1.22    0.50
  -7  23   1    0.48    0.23
   6 -23  -1    0.09    0.14
  -6 -23   1    0.32    0.25
  -6  23   1    0.26    0.20
   6  23  -1   -0.30    0.25
  -5 -23   1    1.37    0.33
   5 -23  -1    0.96    0.18
  -5  23   1    1.16    0.25
   5  23  -1    0.41    0.25
   4 -23  -1    3.08    0.25
  -4 -23   1    2.98    0.40
  -4  23   1    3.50    0.24
   4  23  -1    3.12    0.47
  -4  23   1    2.22    0.33
   3 -23  -1   15.32    0.54
  -3 -23   1   14.21    0.69
   3  23  -1   14.78    0.81
  -3  23   1   15.91    0.68
  -3  23   1   15.97    0.61
  -2 -23   1   11.00    0.55
   2 -23  -1   10.12    0.40
  -2  23   1   10.12    0.54
   2  23  -1   11.16    0.69
  -2  23   1   10.78    0.55
   1 -23  -1   27.04    0.89
   1 -23  -1   28.08    0.66
  -1 -23   1   26.56    0.55
  -1 -23   1   28.14    0.90
  -1 -23   1   27.42    0.51
   1  23  -1   27.77    1.03
  -1  23   1   27.14    1.35
   0 -23   1    0.30    0.12
   0 -23  -1    0.60    0.09
   0 -23  -1    0.27    0.13
   0 -23  -1    0.40    0.09
   0 -23   1    0.35    0.07
   0  23  -1    0.38    0.22
   0  23  -1    0.24    0.08
   0  23   1    0.23    0.19
   1 -23   1   15.56    0.64
  -1 -23  -1   15.35    0.34
  -1 -23  -1   15.30    0.32
  -1 -23  -1   16.19    0.66
   1 -23   1   15.73    0.45
   1  23   1   14.80    0.76
  -1  23  -1   15.87    0.69
  -2 -23  -1    0.09    0.10
   2 -23   1    0.02    0.07
  -2  23  -1    0.16    0.11
  -2  23  -1   -0.08    0.13
   2  23   1    0.13    0.24
   3 -23   1    0.74    0.14
  -3 -23  -1    0.88    0.21
  -3  23  -1    0.75    0.18
  -3  23  -1    0.78    0.21
   3  23   1    0.93    0.28
   4 -23   1    2.52    0.22
  -4 -23  -1    3.30    0.43
  -4  23  -1    2.41    0.23
   4  23   1    2.37    0.43
  -4  23  -1    2.82    0.36
   5 -23   1    0.88    0.18
  -5 -23  -1    1.00    0.28
   5  23   1    0.93    0.31
  -5  23  -1    1.00    0.26
  -6 -23  -1   -0.07    0.21
   6 -23   1    0.08    0.12
  -6  23  -1    0.08    0.17
   6  23   1    0.08    0.25
   7 -23   1   -0.08    0.12
  -7 -23  -1    0.07    0.27
  -7  23  -1   -0.26    0.17
   7  23   1    0.59    0.33
   7 -24  -1    0.10    0.16
  -7 -24   1   -0.04    0.28
  -7  24   1    0.46    0.25
   7  24  -1   -0.11    0.30
   6 -24  -1    0.32    0.17
  -6 -24   1    1.10    0.34
   6  24  -1    0.53    0.32
  -6  24   1    0.34    0.20
   5 -24  -1    0.79    0.18
  -5 -24   1    0.90    0.28
  -5  24   1    0.67    0.21
   5  24  -1    0.67    0.31
  -4 -24   1   11.22    0.66
   4 -24  -1    9.62    0.46
   4  24  -1   10.24    0.73
  -4  24   1   10.73    0.60
  -3 -24   1    7.13    0.50
   3 -24  -1    7.78    0.38
  -3  24   1    8.00    0.49
  -3  24   1    7.76    0.44
   3  24  -1    8.46    0.63
  -2 -24   1    0.30    0.12
   2 -24  -1   -0.04    0.09
  -2  24   1    0.13    0.12
   2  24  -1    0.07    0.21
  -2  24   1    0.09    0.16
  -1 -24   1    1.68    0.09
   1 -24  -1    1.43    0.25
  -1 -24   1    1.60    0.11
  -1 -24   1    2.00    0.28
   1 -24  -1    1.51    0.17
   1  24  -1    1.54    0.33
  -1  24   1    2.20    0.34
   0 -24  -1    0.37    0.10
   0 -24   1    0.03    0.10
   0 -24   1    0.57    0.08
   0 -24  -1    0.42    0.16
   0 -24  -1    0.38    0.08
   0  24  -1    0.07    0.17
   0  24   1    0.00    0.20
   1 -24   1   20.44    0.76
  -1 -24  -1   21.02    0.78
  -1 -24  -1   19.41    0.41
  -1 -24  -1   19.38    0.39
   1 -24   1   19.78    0.53
  -1  24  -1   19.81    0.80
   1  24   1   19.25    0.91
  -2 -24  -1   37.40    1.14
   2 -24   1   38.31    0.89
  -2  24  -1   38.78    1.13
  -2  24  -1   39.10    1.12
   2  24   1   36.31    1.33
  -3 -24  -1   13.22    0.77
   3 -24   1   12.44    0.47
  -3  24  -1   11.81    0.54
   3  24   1   10.78    0.74
  -3  24  -1   12.20    0.60
   4 -24   1    1.66    0.23
  -4 -24  -1    1.82    0.32
  -4  24  -1    1.92    0.23
  -4  24  -1    1.77    0.29
   4  24   1    1.52    0.37
  -5 -24  -1    0.16    0.22
   5 -24   1    0.35    0.13
   5  24   1    0.23    0.26
  -5  24  -1    0.14    0.16
  -6 -24  -1    0.88    0.31
   6 -24   1    0.44    0.17
  -6  24  -1    0.99    0.26
   6  24   1    0.85    0.34
   7 -24   1    0.35    0.18
  -7 -24  -1    0.39    0.31
   7  24   1    0.11    0.35
  -7  24  -1    0.32    0.21
   6 -25  -1    0.63    0.19
  -6 -25   1    1.09    0.38
   6  25  -1    0.45    0.34
  -6  25   1    0.14    0.19
  -5 -25   1    3.39    0.48
   5 -25  -1    2.95    0.27
   5  25  -1    2.36    0.49
  -5  25   1    3.68    0.44
  -4 -25   1    0.45    0.20
   4  25  -1    0.67    0.30
  -4  25   1    0.30    0.18
  -4  25   1    0.54    0.16
   3 -25  -1    0.44    0.11
  -3 -25   1    0.42    0.17
  -3  25   1    0.17    0.14
   3  25  -1    0.38    0.25
  -3  25   1    0.32    0.19
   2 -25  -1    5.67    0.30
  -2 -25   1    5.92    0.42
  -2  25   1    5.63    0.41
  -2  25   1    6.64    0.48
   2  25  -1    5.81    0.52
   1 -25  -1   27.58    0.67
  -1 -25   1   26.99    0.92
  -1 -25   1   27.28    0.51
  -1 -25   1   26.16    0.54
   1 -25  -1   26.79    0.92
  -1  25   1   26.94    1.00
   1  25  -1   27.54    1.07
   0 -25   1   20.90    0.78
   0 -25  -1   19.68    0.77
   0 -25   1   20.66    0.49
   0 -25  -1   20.87    0.49
   0  25   1   22.72    0.94
   0  25  -1   19.84    0.88
  -1 -25  -1    4.39    0.15
  -1 -25  -1    4.94    0.38
  -1 -25  -1    4.65    0.14
   1 -25   1    4.54    0.23
   1 -25   1    5.43    0.39
  -1  25  -1    5.26    0.45
   1  25   1    4.52    0.45
  -2 -25  -1    6.22    0.45
   2 -25   1    6.42    0.31
  -2  25  -1    6.40    0.44
  -2  25  -1    6.50    0.42
   2  25   1    5.70    0.52
  -3 -25  -1   14.76    0.72
   3 -25   1   14.94    0.53
   3  25   1   16.06    0.91
  -3  25  -1   14.51    0.68
  -3  25  -1   14.84    0.62
   4 -25   1    2.28    0.30
  -4 -25  -1    2.38    0.38
  -4  25  -1    2.62    0.36
  -4  25  -1    2.63    0.27
   4  25   1    2.18    0.45
   5 -25   1    8.75    0.45
  -5 -25  -1   11.25    0.72
  -5  25  -1    8.88    0.58
   5  25   1    8.00    0.72
   6 -25   1    0.18    0.14
  -6  25  -1    0.06    0.18
   6  25   1   -0.15    0.26
  -6 -26   1    0.48    0.26
   6 -26  -1    0.37    0.17
  -6  26   1    0.12    0.21
   6  26  -1    0.20    0.31
  -5 -26   1    1.69    0.36
   5 -26  -1    1.32    0.22
   5  26  -1    1.22    0.44
  -5  26   1    1.29    0.27
   4 -26  -1    1.17    0.21
  -4 -26   1    1.28    0.30
  -4  26   1    1.26    0.24
   4  26  -1    2.03    0.43
  -4  26   1    1.17    0.23
   3 -26  -1   -0.03    0.10
  -3 -26   1    0.07    0.15
  -3  26   1    0.06    0.12
  -3  26   1   -0.19    0.17
   3  26  -1    0.09    0.21
  -2 -26   1   12.90    0.77
   2 -26  -1   13.00    0.47
   2  26  -1   14.22    0.81
  -2  26   1   11.87    0.65
  -1 -26   1    9.26    0.52
   1 -26  -1    9.42    0.35
   1 -26  -1    9.24    0.53
  -1 -26   1    9.55    0.26
  -1 -26   1    9.36    0.23
  -1  26   1    9.74    0.60
   1  26  -1   10.49    0.68
   0 -26   1    0.82    0.11
   0 -26  -1    0.46    0.16
   0 -26   1    0.88    0.20
   0 -26  -1    0.76    0.11
   0  26   1    0.73    0.26
   0  26  -1    0.77    0.23
  -1 -26  -1    0.96    0.21
   1 -26   1    0.81    0.20
  -1 -26  -1    0.89    0.07
  -1 -26  -1    0.92    0.08
  -1  26  -1    0.93    0.26
   1  26   1    0.84    0.33
   2 -26   1    6.49    0.31
  -2 -26  -1    5.65    0.45
   2  26   1    6.63    0.60
  -2  26  -1    5.74    0.44
  -3 -26  -1    0.40    0.16
   3 -26   1    0.92    0.16
   3  26   1    0.37    0.26
  -3  26  -1    0.70    0.20
  -3  26  -1    0.80    0.22
   4 -26   1    0.26    0.11
  -4 -26  -1    0.28    0.18
   4  26   1    0.06    0.23
  -4  26  -1    0.47    0.21
  -4  26  -1    0.25    0.18
   5 -26   1    0.38    0.15
  -5 -26  -1    0.80    0.27
   5  26   1    0.43    0.30
  -5  26  -1    0.17    0.20
  -6 -26  -1    0.19    0.25
   6  26   1   -0.45    0.29
  -6  26  -1   -0.08    0.15
   6 -27  -1    8.99    0.52
  -6 -27   1   10.63    0.78
  -6  27   1    7.69    0.60
   6  27  -1    9.30    0.85
   5 -27  -1    0.10    0.14
  -5 -27   1    0.37    0.22
  -5  27   1    0.25    0.18
   5  27  -1    0.02    0.23
   4 -27  -1    0.31    0.11
  -4 -27   1    0.36    0.22
   4  27  -1    0.24    0.25
  -4  27   1    0.07    0.13
   3 -27  -1    0.06    0.11
  -3 -27   1   -0.09    0.13
  -3  27   1    0.15    0.15
   3  27  -1    0.09    0.25
  -3  27   1   -0.11    0.18
   2 -27  -1    0.21    0.13
   2 -27  -1    0.06    0.09
  -2 -27   1    0.25    0.14
   2  27  -1    0.02    0.25
  -2  27   1    0.15    0.20
  -1 -27   1    0.74    0.06
  -1 -27   1    0.97    0.23
   1 -27  -1    1.00    0.16
   1 -27  -1    0.88    0.21
  -1  27   1    0.61    0.25
   1  27  -1    0.53    0.24
   0 -27   1    0.21    0.07
   0 -27  -1    0.06    0.06
   0 -27  -1    0.20    0.13
   0  27  -1   -0.06    0.19
   0  27   1    0.11    0.23
   1 -27   1    0.10    0.07
   1 -27   1    0.15    0.14
  -1 -27  -1    0.08    0.03
  -1 -27  -1    0.20    0.14
  -1  27  -1    0.09    0.18
   1  27   1    0.00    0.20
   2 -27   1    1.45    0.27
   2 -27   1    1.38    0.18
  -2 -27  -1    1.36    0.25
   2  27   1    1.33    0.34
  -2  27  -1    1.17    0.28
   3 -27   1    1.49    0.21
  -3 -27  -1    1.12    0.27
   3  27   1    1.28    0.37
  -3  27  -1    1.59    0.29
  -3  27  -1    1.44    0.29
  -4 -27  -1    0.51    0.23
   4 -27   1    0.37    0.12
  -4  27  -1    0.34    0.17
  -4  27  -1    0.27    0.21
   4  27   1    0.12    0.25
   5 -27   1    0.15    0.14
  -5 -27  -1   -0.14    0.20
  -5  27  -1    0.06    0.15
   5  27   1    0.13    0.26
  -6 -27  -1    4.60    0.61
  -6  27  -1    3.61    0.48
   6  27   1    4.48    0.69
  -6 -28   1    1.24    0.38
   6 -28  -1    1.02    0.23
  -6  28   1    0.80    0.28
   6  28  -1    0.26    0.39
   5 -28  -1    2.19    0.28
  -5  28   1    1.74    0.37
  -4 -28   1    0.34    0.20
   4 -28  -1    0.04    0.12
  -4  28   1    0.06    0.13
   4  28  -1   -0.04    0.19
   3 -28  -1    1.23    0.20
  -3 -28   1    1.40    0.28
   3  28  -1    1.09    0.37
  -3  28   1    0.64    0.27
  -3  28   1    1.48    0.28
  -2 -28   1    0.09    0.12
   2 -28  -1   -0.05    0.09
   2 -28  -1    0.20    0.15
   2  28  -1   -0.08    0.19
  -2  28   1    0.02    0.19
  -1 -28   1    0.64    0.06
   1 -28  -1    0.55    0.19
   1 -28  -1    0.59    0.12
  -1 -28   1    0.33    0.15
  -1  28   1    0.41    0.25
   1  28  -1    0.23    0.23
   0 -28  -1    4.23    0.20
   0 -28  -1    4.42    0.38
   0 -28   1    4.47    0.38
   0 -28   1    4.31    0.20
   0  28   1    4.00    0.53
   0  28  -1    3.54    0.47
   1 -28   1    2.64    0.36
   1 -28   1    2.20    0.18
  -1 -28  -1    2.22    0.08
  -1 -28  -1    1.90    0.31
  -1  28  -1    2.41    0.37
   1  28   1    2.33    0.43
   2 -28   1    5.17    0.42
  -2 -28  -1    4.62    0.41
   2 -28   1    4.78    0.28
   2  28   1    5.01    0.63
  -2  28  -1    4.66    0.43
   3 -28   1    4.32    0.29
  -3 -28  -1    4.85    0.44
  -3  28  -1    3.50    0.36
   3  28   1    3.86    0.58
  -3  28  -1    3.06    0.33
   4 -28   1    1.06    0.19
  -4 -28  -1    1.27    0.30
   4  28   1    1.36    0.38
  -4  28  -1    0.99    0.24
   5 -28   1   -0.26    0.10
  -5  28  -1    0.21    0.19
   5 -29  -1    0.67    0.20
  -5 -29   1    0.63    0.28
   5  29  -1    1.02    0.37
  -5  29   1    0.85    0.27
  -4 -29   1    3.29    0.46
   4 -29  -1    3.26    0.30
   4  29  -1    2.94    0.51
  -4  29   1    4.23    0.41
   3 -29  -1    0.09    0.10
  -3 -29   1    0.17    0.19
  -3  29   1    0.09    0.20
   3  29  -1    0.38    0.29
  -3  29   1    0.00    0.16
   2 -29  -1    0.38    0.10
  -2 -29   1    0.60    0.20
   2 -29  -1    0.13    0.12
  -2  29   1    0.20    0.22
   2  29  -1    0.36    0.24
   1 -29  -1    0.09    0.14
  -1 -29   1    0.44    0.20
   1 -29  -1    0.14    0.08
  -1  29   1   -0.15    0.21
   1  29  -1   -0.02    0.25
   0 -29   1    0.49    0.19
   0 -29  -1    0.45    0.09
   0 -29  -1    0.38    0.17
   0  29  -1    0.45    0.27
   0  29   1    0.31    0.27
  -1 -29  -1    0.47    0.19
   1 -29   1    0.53    0.11
   1 -29   1    0.76    0.20
   1  29   1    0.61    0.26
  -1  29  -1    0.64    0.23
   2 -29   1    5.45    0.29
   2 -29   1    4.87    0.41
  -2 -29  -1    5.04    0.45
   2  29   1    6.10    0.58
  -2  29  -1    5.73    0.48
  -3 -29  -1    5.65    0.50
  -3  29  -1    5.93    0.46
  -3  29  -1    4.99    0.44
   3  29   1    5.99    0.64
   4 -29   1    1.16    0.21
  -4 -29  -1    1.32    0.34
   4  29   1    1.51    0.44
  -4  29  -1    1.00    0.27
   5 -29   1    2.11    0.29
  -5 -29  -1    2.57    0.46
  -5  29  -1    2.08    0.36
   5  29   1    1.95    0.53
   5 -30  -1    0.38    0.16
  -5 -30   1    0.11    0.22
  -5  30   1    0.00    0.16
   5  30  -1   -0.36    0.27
   4 -30  -1    0.61    0.15
  -4 -30   1    0.70    0.28
  -4  30   1    0.89    0.28
   4  30  -1    0.84    0.36
   3 -30  -1    0.31    0.12
  -3 -30   1    0.35    0.20
   3  30  -1    0.29    0.29
  -3  30   1    0.33    0.25
  -2 -30   1    3.28    0.43
   2 -30  -1    2.46    0.38
   2 -30  -1    2.55    0.21
   2  30  -1    2.15    0.41
  -2  30   1    1.99    0.34
   1 -30  -1    1.01    0.14
   1 -30  -1    0.69    0.22
  -1 -30   1    1.04    0.22
  -1  30   1    1.08    0.31
   1  30  -1    1.31    0.34
   0 -30  -1    2.40    0.35
   0 -30   1    2.42    0.16
   0 -30  -1    2.19    0.15
   0 -30   1    2.59    0.37
   0  30   1    2.69    0.46
   1 -30   1    0.97    0.23
   1 -30   1    0.80    0.13
  -1 -30  -1    1.25    0.30
  -1  30  -1    0.94    0.29
   1  30   1    0.74    0.32
  -2 -30  -1    0.67    0.21
   2 -30   1    0.98    0.24
   2 -30   1    1.03    0.15
  -2  30  -1    0.62    0.24
   2  30   1    0.80    0.31
   3 -30   1    0.11    0.11
  -3 -30  -1    0.52    0.20
   3  30   1   -0.04    0.29
  -3  30  -1   -0.29    0.21
   4 -30   1    0.31    0.13
  -4  30  -1    0.19    0.15
  -5 -30  -1    0.88    0.30
   5  30   1    0.67    0.36
  -5  30  -1    1.07    0.26
  -4 -31   1    2.99    0.46
  -4  31   1    2.74    0.40
   4  31  -1    3.22    0.58
   3 -31  -1   -0.23    0.09
   3 -31  -1    0.00    0.16
  -3 -31   1    0.16    0.20
   3  31  -1   -0.20    0.26
  -3  31   1   -0.28    0.26
   2 -31  -1    0.13    0.11
  -2 -31   1    0.37    0.20
   2 -31  -1    0.38    0.15
  -2  31   1    0.04    0.24
   2  31  -1    0.67    0.31
  -1 -31   1    0.09    0.14
   1 -31  -1    0.04    0.13
   1 -31  -1    0.05    0.08
   1  31  -1   -0.06    0.22
  -1  31   1   -0.04    0.23
   0 -31  -1    0.32    0.12
   0 -31   1    0.58    0.21
   0 -31   1    0.24    0.09
   0 -31  -1   -0.01    0.11
   0  31   1    0.04    0.23
   0  31  -1   -0.11    0.24
   1 -31   1    2.66    0.19
   1 -31   1    2.37    0.35
  -1 -31  -1    2.04    0.34
  -1  31  -1    1.74    0.37
   1  31   1    2.02    0.40
   2 -31   1    0.41    0.19
   2 -31   1    0.16    0.11
  -2 -31  -1    0.51    0.19
  -2  31  -1    0.30    0.27
   2  31   1    0.41    0.32
  -3 -31  -1    0.33    0.22
   3 -31   1    0.22    0.16
   3 -31   1   -0.20    0.09
  -3  31  -1    0.21    0.28
   3  31   1   -0.40    0.26
   4 -31   1    7.87    0.43
  -4 -31  -1    7.79    0.63
   4  31   1    7.58    0.79
  -4  31  -1    7.39    0.55
   4 -32  -1    0.27    0.15
  -4 -32   1    0.01    0.18
   4  32  -1    0.42    0.33
  -4  32   1    0.16    0.20
   3 -32  -1    1.16    0.33
  -3 -32   1    1.06    0.32
   3 -32  -1    0.93    0.18
   3  32  -1    1.44    0.48
   2 -32  -1    2.70    0.23
  -2 -32   1    3.31    0.44
   2 -32  -1    3.05    0.42
  -2  32   1    2.30    0.41
   2  32  -1    2.39    0.48
   1 -32  -1    1.20    0.16
   1 -32  -1    1.17    0.26
  -1 -32   1    1.42    0.30
   1  32  -1    0.31    0.33
   0 -32   1    3.74    0.38
   0 -32  -1    3.66    0.37
   0  32   1    3.29    0.53
   0  32  -1    3.73    0.53
   1 -32   1    5.05    0.27
  -1 -32  -1    5.50    0.48
   1 -32   1    5.29    0.46
   1  32   1    5.05    0.65
  -1  32  -1    5.02    0.68
   2 -32   1    3.99    0.27
   2 -32   1    4.31    0.42
  -2 -32  -1    4.81    0.45
   2  32   1    4.59    0.67
  -2  32  -1    4.35    0.55
   3 -32   1    0.09    0.12
  -3 -32  -1    0.27    0.20
  -3  32  -1   -0.21    0.31
   3  32   1    0.22    0.38
  -4 -32  -1    0.43    0.22
   4 -32   1   -0.11    0.13
   4  32   1   -0.38    0.31
  -4  32  -1    0.45    0.19
   3 -33  -1    0.14    0.19
  -3 -33   1   -0.02    0.19
   3  33  -1   -0.05    0.31
   2 -33  -1    3.29    0.50
   2 -33  -1    4.61    0.28
  -2  33   1    4.96    0.62
   2  33  -1    5.31    0.74
   1 -33  -1    1.14    0.27
  -1 -33   1    1.11    0.28
  -1  33   1    1.04    0.38
   1  33  -1    1.00    0.43
   0 -33  -1    0.48    0.20
   0 -33   1    0.25    0.16
   0  33   1    0.46    0.31
   0  33  -1    0.20    0.29
   1 -33   1    0.08    0.14
   1 -33   1    0.04    0.15
  -1 -33  -1    0.13    0.18
  -1  33  -1   -0.13    0.27
   1  33   1    0.31    0.32
  -2 -33  -1    1.21    0.31
   2 -33   1    0.90    0.15
  -2  33  -1    1.02    0.33
   2  33   1    0.99    0.35
  -3 -33  -1    0.61    0.26
   3 -33   1    0.36    0.15
   3 -33   1    0.97    0.25
   3  33   1    0.64    0.39
  -3 -34   1    1.85    0.38
  -2 -34   1    1.41    0.31
   2 -34  -1    1.81    0.34
   2 -34  -1    1.56    0.21
   1 -34  -1    3.01    0.42
  -1 -34   1    1.76    0.35
   1  34  -1    2.00    0.45
  -1  34   1    2.83    0.49
   0 -34  -1    0.87    0.26
   0 -34   1    0.93    0.27
   0  34   1    0.74    0.37
   0  34  -1    1.00    0.36
   1 -34   1    0.59    0.24
  -1 -34  -1    0.61    0.21
  -1  34  -1    0.27    0.34
   1  34   1   -0.03    0.32
  -2 -34  -1    0.37    0.27
   2 -34   1    0.58    0.21
  -2  34  -1    0.69    0.36
   1 -35  -1    2.51    0.40
  -1 -35   1    3.16    0.44
  -1  35   1    2.69    0.55
   1  35  -1    3.07    0.55
   0 -35  -1    1.70    0.33
   0 -35   1    2.57    0.41
   0  35   1    1.73    0.47
   0  35  -1    1.52    0.45
  -1 -35  -1    0.25    0.21
   1 -35   1    0.26    0.18
  -1  35  -1    0.24    0.33
   1  35   1   -0.01    0.30
   9   0  -2    4.24    0.33
  -9   0   2    4.20    0.61
  -8   0   2   17.06    0.97
   8   0  -2   17.38    0.68
   8   0  -2   18.30    0.63
   7   0  -2    0.47    0.13
   7   0  -2    0.55    0.16
  -7   0   2    0.40    0.27
   6   0  -2    0.41    0.12
  -6   0   2    0.16    0.19
  -6   0   2    0.66    0.17
   6   0  -2    0.24    0.14
   5   0  -2    2.06    0.20
  -5   0   2    3.17    0.42
   5   0  -2    2.23    0.18
   4   0  -2    4.75    0.25
   4   0  -2    4.55    0.23
  -4   0   2    5.23    0.37
  -4   0   2    4.58    0.26
   3   0  -2  390.17    6.26
   3   0  -2  388.93    6.07
  -3   0   2  380.78    6.10
   2   0  -2  140.89    2.43
   2   0  -2  141.04    2.36
   2   0  -2  140.14    2.31
   2   0  -2  146.38    2.32
  -2   0   2  147.21    2.38
  -2   0   2  140.82    2.46
  -1   0   2    7.37    0.20
  -1   0   2    7.39    0.23
   1   0  -2    7.09    0.23
   1   0  -2    6.83    0.19
  -1   0   2    7.22    0.26
   1   0  -2    6.92    0.25
   0   0  -2  580.43   10.63
  -1   0  -2   10.06    0.34
  -1   0  -2   10.08    0.23
   1   0   2    9.14    0.25
  -1   0  -2    9.96    0.34
   1   0   2   10.14    0.23
  -1   0  -2    9.32    0.26
  -2   0  -2   21.55    0.57
  -2   0  -2   22.58    0.46
   2   0   2   20.98    0.54
  -2   0  -2   22.18    0.57
   2   0   2   22.87    0.61
   3   0   2  164.38    2.89
   3   0   2  160.95    2.64
  -3   0  -2  165.17    2.90
   3   0   2  160.62    2.83
  -3   0  -2  162.02    2.80
  -3   0  -2  162.72    2.66
   4   0   2   32.95    0.92
  -4   0  -2   33.06    0.97
  -4   0  -2   33.44    0.83
   4   0   2   33.06    0.72
   5   0   2   20.22    0.74
  -5   0  -2   19.64    0.63
  -5   0  -2   23.08    0.86
   5   0   2   20.58    0.55
   6   0   2    0.06    0.13
  -6   0  -2    0.12    0.18
   6   0   2    0.20    0.09
  -7   0  -2    2.96    0.45
  -7   0  -2    3.31    0.40
   7   0   2    2.45    0.21
  -8   0  -2    1.15    0.33
  -8   0  -2    1.52    0.34
   9   0   2    2.18    0.26
  -9   0  -2    1.04    0.40
   9  -1  -2    1.05    0.19
  -9  -1   2    0.88    0.35
   9   1  -2    0.72    0.17
  -9   1   2    0.83    0.38
   8  -1  -2    0.22    0.13
  -8  -1   2    0.24    0.26
   8  -1  -2    0.14    0.14
   8   1  -2    0.22    0.16
   8   1  -2    0.03    0.11
  -8   1   2   -0.18    0.21
  -7  -1   2    3.57    0.50
   7  -1  -2    4.00    0.28
   7  -1  -2    3.77    0.30
   7   1  -2    3.77    0.32
   7   1  -2    4.20    0.27
  -7   1   2    4.65    0.31
  -7   1   2    3.17    0.48
   6  -1  -2    0.46    0.13
  -6  -1   2    0.59    0.24
   6  -1  -2    0.87    0.15
  -6   1   2    0.95    0.30
   6   1  -2    0.63    0.17
  -6   1   2    0.88    0.18
   6   1  -2    0.79    0.16
   5  -1  -2    1.67    0.17
  -5  -1   2    1.92    0.23
   5  -1  -2    1.53    0.18
  -5  -1   2    1.95    0.32
   5   1  -2    1.82    0.23
   5   1  -2    1.72    0.16
  -5   1   2    1.92    0.32
  -5   1   2    1.68    0.20
   4  -1  -2   34.01    0.76
  -4  -1   2   34.89    1.02
  -4  -1   2   34.61    0.84
   4  -1  -2   36.17    0.79
  -4   1   2   34.35    0.79
   4   1  -2   35.29    0.76
  -4   1   2   36.06    1.04
   4   1  -2   34.58    0.81
   3  -1  -2    5.30    0.23
  -3  -1   2    5.44    0.28
  -3  -1   2    5.64    0.35
   3  -1  -2    5.22    0.33
   3  -1  -2    5.68    0.24
   3   1  -2    5.09    0.22
   3   1  -2    5.65    0.28
  -3   1   2    5.85    0.37
   3   1  -2    5.31    0.31
  -3   1   2    5.06    0.25
  -2  -1   2   18.26    0.51
   2  -1  -2   16.90    0.41
   2  -1  -2   18.18    0.42
  -2  -1   2   17.58    0.46
   2  -1  -2   17.39    0.49
  -2   1   2   17.49    0.43
   2   1  -2   17.51    0.40
   2   1  -2   18.26    0.49
  -2   1   2   16.61    0.56
   2   1  -2   18.39    0.40
   2   1  -2   17.87    0.46
   1  -1  -2   84.29    1.43
  -1  -1   2   82.68    1.45
   1  -1  -2   81.23    1.40
   1  -1  -2   82.78    1.36
  -1  -1   2   83.76    1.34
  -1  -1   2   81.73    1.39
   1   1  -2   80.80    1.44
   1   1  -2   80.44    1.37
   1   1  -2   80.25    1.33
  -1   1   2   79.67    1.43
  -1   1   2   83.57    1.40
  -1   1   2   82.46    1.36
   0  -1  -2   10.82    0.34
   0  -1   2   11.08    0.23
   0  -1   2   10.51    0.18
   0  -1   2   10.76    0.33
   0  -1  -2   10.96    0.20
   0  -1   2   10.57    0.19
   0  -1  -2   11.11    0.23
   0   1   2   10.86    0.23
   0   1   2   10.74    0.20
   0   1  -2   11.01    0.34
   0   1   2   10.59    0.33
   0   1  -2   10.87    0.23
   1  -1   2  373.34    8.39
  -1  -1  -2  366.44    8.08
  -1   1  -2  363.15    8.27
  -2  -1  -2    0.63    0.07
   2  -1   2    0.80    0.13
  -2  -1  -2    0.97    0.14
   2  -1   2    0.70    0.07
  -2  -1  -2    0.76    0.12
  -2   1  -2    0.79    0.07
   2   1   2    0.59    0.13
  -2   1  -2    0.73    0.12
  -2   1  -2    0.69    0.12
   2   1   2    0.76    0.07
  -2   1  -2    0.95    0.14
   2   1   2    0.72    0.11
   3  -1   2    0.08    0.12
  -3  -1  -2    0.14    0.07
   3  -1   2    0.13    0.06
  -3  -1  -2    0.13    0.11
  -3  -1  -2    0.10    0.14
   3   1   2    0.12    0.11
  -3   1  -2   -0.01    0.08
   3   1   2    0.03    0.12
   3   1   2    0.12    0.05
  -3   1  -2    0.18    0.07
  -3   1  -2    0.30    0.16
   4  -1   2    2.21    0.27
  -4  -1  -2    1.28    0.19
   4  -1   2    1.88    0.15
  -4  -1  -2    2.19    0.28
   4   1   2    1.91    0.13
   4   1   2    1.68    0.24
  -4   1  -2    1.72    0.25
   5  -1   2   29.32    0.71
  -5  -1  -2   27.53    0.98
   5   1   2   29.71    0.69
   5   1   2   29.72    0.93
  -5   1  -2   29.30    1.01
  -5   1  -2   28.79    0.78
  -6  -1  -2    2.76    0.42
   6  -1   2    1.95    0.18
   6   1   2    2.00    0.19
  -6   1  -2    2.14    0.35
   6   1   2    2.32    0.34
  -6   1  -2    2.40    0.31
   7  -1   2    1.67    0.21
  -7  -1  -2    1.93    0.41
  -7   1  -2    2.02    0.37
   7   1   2    1.72    0.20
  -7   1  -2    1.84    0.31
   8  -1   2    2.31    0.26
  -8  -1  -2    2.49    0.41
  -8  -1  -2    1.09    0.34
   8   1   2    2.55    0.24
  -8   1  -2    2.58    0.38
  -8   1  -2    2.11    0.41
   9  -1   2   -0.11    0.11
  -9  -1  -2    0.02    0.29
  -9   1  -2    0.07    0.28
   9   1   2    0.05    0.13
   9  -2  -2    0.24    0.15
  -9  -2   2    0.32    0.36
   9   2  -2    0.48    0.15
  -9   2   2   -0.21    0.26
   8  -2  -2    2.28    0.31
  -8  -2   2    2.93    0.54
   8   2  -2    2.78    0.35
  -8   2   2    2.78    0.47
   8   2  -2    2.59    0.24
  -7  -2   2    2.74    0.46
   7  -2  -2    1.87    0.23
   7  -2  -2    1.82    0.23
   7   2  -2    2.11    0.29
   7   2  -2    1.69    0.21
  -7   2   2    1.95    0.38
  -6  -2   2    2.51    0.40
   6  -2  -2    1.99    0.19
   6  -2  -2    2.07    0.23
   6   2  -2    1.96    0.26
   6   2  -2    1.86    0.18
  -6   2   2    2.29    0.22
  -6   2   2    1.95    0.35
  -5  -2   2    2.43    0.35
   5  -2  -2    2.03    0.18
  -5  -2   2    1.94    0.26
   5  -2  -2    2.35    0.20
   5   2  -2    2.16    0.23
   5   2  -2    2.43    0.18
  -5   2   2    2.44    0.19
  -5   2   2    2.15    0.32
  -4  -2   2   11.97    0.46
   4  -2  -2   11.97    0.40
  -4  -2   2   12.07    0.56
   4  -2  -2   12.86    0.37
   4   2  -2   12.70    0.38
   4   2  -2   12.31    0.38
   4   2  -2   12.47    0.44
  -4   2   2   12.29    0.39
  -4   2   2   13.61    0.59
   3  -2  -2    1.86    0.25
   3  -2  -2    1.61    0.14
  -3  -2   2    2.24    0.27
   3  -2  -2    1.56    0.14
   3   2  -2    1.80    0.14
  -3   2   2    1.54    0.16
  -3   2   2    1.67    0.16
   3   2  -2    2.03    0.20
  -3   2   2    2.38    0.28
   3   2  -2    1.45    0.20
   3   2  -2    1.87    0.14
   2  -2  -2   75.56    1.31
  -2  -2   2   71.66    1.38
   2  -2  -2   75.65    1.29
   2  -2  -2   74.21    1.42
   2  -2  -2   75.71    1.31
   2   2  -2   75.30    1.27
   2   2  -2   76.06    1.38
  -2   2   2   74.56    1.31
   2   2  -2   75.28    1.27
   2   2  -2   76.04    1.38
  -1  -2   2   19.04    0.43
  -1  -2   2   19.56    0.49
   1  -2  -2   19.62    0.46
   1  -2  -2   19.10    0.41
   1  -2  -2   19.87    0.45
  -1  -2   2   20.07    0.39
  -1   2   2   19.81    0.41
   1   2  -2   19.43    0.48
   1   2  -2   19.84    0.38
  -1   2   2   19.25    0.44
   1   2  -2   19.19    0.41
  -1   2   2   18.99    0.45
   0  -2  -2   75.27    1.19
   0  -2   2   71.66    1.34
   0  -2  -2   73.61    1.20
   0  -2   2   73.68    1.17
   0  -2  -2   76.37    1.35
   0  -2  -2   74.93    1.35
   0   2  -2   73.92    1.34
   0   2   2   74.39    1.18
   0   2  -2   75.33    1.19
   1  -2   2  118.14    1.96
   1  -2   2  118.59    2.06
  -1  -2  -2  119.28    1.94
  -1  -2  -2  121.73    2.09
  -1   2  -2  122.29    1.91
   1   2   2  117.66    1.93
   1   2   2  124.23    2.12
  -1   2  -2  118.68    1.96
  -1   2  -2  118.33    2.06
   2  -2   2    6.43    0.20
  -2  -2  -2    6.29    0.29
  -2  -2  -2    6.34    0.19
   2  -2   2    6.41    0.27
  -2  -2  -2    6.08    0.28
   2   2   2    5.96    0.24
  -2   2  -2    6.44    0.28
  -2   2  -2    6.52    0.28
  -2   2  -2    6.49    0.21
  -2   2  -2    6.74    0.28
   2   2   2    6.19    0.18
   3  -2   2   69.14    1.24
  -3  -2  -2   67.31    1.45
   3  -2   2   68.86    1.43
  -3   2  -2   67.67    1.25
  -3   2  -2   69.13    1.35
  -3   2  -2   68.78    1.46
  -3   2  -2   70.38    1.41
   3   2   2   68.44    1.38
   3   2   2   70.94    1.48
   3   2   2   68.89    1.21
  -4  -2  -2    4.54    0.36
   4  -2   2    4.37    0.22
  -4  -2  -2    3.96    0.28
   4   2   2    4.47    0.20
  -4   2  -2    4.36    0.25
  -4   2  -2    5.02    0.35
  -4   2  -2    4.09    0.30
   4   2   2    3.95    0.30
   5  -2   2    0.11    0.08
  -5  -2  -2   -0.06    0.14
  -5   2  -2    0.07    0.10
   5   2   2    0.02    0.06
   5   2   2    0.07    0.15
  -5   2  -2    0.17    0.15
  -5   2  -2    0.26    0.15
   6  -2   2    1.32    0.18
  -6  -2  -2    1.20    0.30
  -6   2  -2    1.43    0.26
   6   2   2    1.63    0.18
   6   2   2    0.97    0.25
  -6   2  -2    1.50    0.32
  -7  -2  -2   25.23    1.12
   7  -2   2   25.26    0.73
  -7   2  -2   25.08    1.08
  -7   2  -2   25.12    0.89
   7   2   2   26.51    1.15
   7   2   2   26.84    0.72
  -8  -2  -2   -0.21    0.19
  -8  -2  -2   -0.12    0.22
   8  -2   2    0.02    0.10
   8   2   2    0.01    0.09
  -8   2  -2   -0.14    0.18
  -8   2  -2   -0.09    0.21
  -9  -2  -2    0.08    0.32
   9  -2   2    0.07    0.14
  -9   2  -2    0.04    0.24
   9   2   2    0.62    0.16
   9  -3  -2    3.28    0.32
  -9  -3   2    2.94    0.57
   9   3  -2    3.52    0.28
  -9   3   2    3.12    0.56
   8  -3  -2    4.39    0.32
  -8  -3   2    4.43    0.63
  -8   3   2    4.07    0.56
   8   3  -2    4.69    0.40
   8   3  -2    4.71    0.29
   7  -3  -2    3.23    0.26
  -7  -3   2    2.57    0.47
  -7   3   2    2.89    0.45
   7   3  -2    2.57    0.35
   7   3  -2    2.95    0.23
  -7   3   2    2.81    0.22
   6  -3  -2   16.19    0.53
   6  -3  -2   16.34    0.55
  -6  -3   2   16.88    0.82
   6   3  -2   16.90    0.65
  -6   3   2   16.44    0.49
  -6   3   2   16.39    0.80
   5  -3  -2    4.47    0.27
  -5  -3   2    4.28    0.41
   5  -3  -2    4.41    0.22
  -5   3   2    4.85    0.24
  -5   3   2    5.37    0.41
   5   3  -2    4.54    0.24
   5   3  -2    4.13    0.30
  -4  -3   2    0.01    0.11
   4  -3  -2    0.15    0.09
   4  -3  -2    0.21    0.07
  -4  -3   2   -0.08    0.13
   4   3  -2    0.30    0.12
  -4   3   2    0.26    0.09
   4   3  -2    0.23    0.08
   4   3  -2    0.40    0.09
  -4   3   2    0.17    0.13
  -3  -3   2    9.10    0.40
   3  -3  -2    9.35    0.43
   3  -3  -2    9.67    0.32
  -3  -3   2   10.14    0.46
   3  -3  -2    9.62    0.27
   3   3  -2    9.50    0.38
   3   3  -2    9.28    0.39
  -3   3   2    9.64    0.33
  -3   3   2    9.40    0.29
   3   3  -2    9.60    0.29
   3   3  -2    9.57    0.29
  -3   3   2   10.11    0.45
  -2  -3   2   30.91    0.73
   2  -3  -2   30.77    0.60
   2  -3  -2   31.81    0.65
   2  -3  -2   31.72    0.65
   2  -3  -2   31.72    0.75
  -2  -3   2   31.88    0.74
  -2   3   2   32.44    0.76
   2   3  -2   31.07    0.60
   2   3  -2   32.59    0.73
   2   3  -2   31.14    0.69
   2   3  -2   31.66    0.60
  -2   3   2   31.16    0.63
  -1  -3   2   14.09    0.41
   1  -3  -2   13.80    0.36
  -1  -3   2   13.68    0.34
  -1  -3   2   14.32    0.29
   1  -3  -2   13.85    0.36
   1  -3  -2   14.14    0.33
   1   3  -2   13.96    0.29
  -1   3   2   13.49    0.36
  -1   3   2   14.75    0.37
   1   3  -2   14.40    0.33
  -1   3   2   13.85    0.33
   1   3  -2   14.06    0.41
   0  -3  -2   52.62    0.88
   0  -3   2   52.91    0.87
   0  -3  -2   53.95    1.02
   0  -3   2   52.20    0.87
   0  -3   2   52.07    0.87
   0  -3  -2   53.23    0.88
   0  -3   2   52.26    1.02
   0   3   2   53.46    0.88
   0   3  -2   52.38    1.02
   0   3   2   53.78    1.03
   0   3  -2   51.73    0.87
   0   3   2   53.02    0.89
  -1  -3  -2  443.64    9.11
   1  -3   2  428.07    9.65
  -1  -3  -2  409.53   10.34
  -1   3  -2  450.50    9.69
  -2  -3  -2   14.71    0.50
  -2  -3  -2   15.96    0.34
   2  -3   2   15.90    0.38
  -2  -3  -2   16.10    0.50
   2  -3   2   15.05    0.46
  -2   3  -2   16.07    0.46
   2   3   2   15.79    0.43
  -2   3  -2   15.30    0.51
  -2   3  -2   17.02    0.48
   2   3   2   16.09    0.53
   2   3   2   16.18    0.34
  -2   3  -2   15.88    0.38
  -3  -3  -2   17.86    0.42
  -3  -3  -2   18.70    0.59
   3  -3   2   18.63    0.60
  -3  -3  -2   18.64    0.61
   3  -3   2   17.76    0.45
  -3   3  -2   17.28    0.46
   3   3   2   18.69    0.64
   3   3   2   18.49    0.41
  -3   3  -2   18.24    0.56
  -3   3  -2   18.19    0.60
   3   3   2   17.96    0.55
  -3   3  -2   17.38    0.51
  -4  -3  -2   17.01    0.65
  -4  -3  -2   16.34    0.65
   4  -3   2   16.40    0.46
  -4  -3  -2   16.29    0.44
  -4   3  -2   16.78    0.50
  -4   3  -2   16.23    0.56
   4   3   2   16.95    0.65
   4   3   2   16.26    0.42
  -4   3  -2   15.06    0.61
  -5  -3  -2    0.12    0.15
   5  -3   2    0.00    0.06
  -5   3  -2    0.05    0.11
   5   3   2   -0.01    0.15
  -5   3  -2   -0.08    0.12
   5   3   2   -0.06    0.05
  -5   3  -2    0.53    0.17
   6  -3   2    2.02    0.18
  -6  -3  -2    2.15    0.36
  -6   3  -2    2.13    0.29
  -6   3  -2    2.25    0.24
   6   3   2    2.12    0.18
  -6   3  -2    2.09    0.35
   6   3   2    1.88    0.31
  -7  -3  -2    1.53    0.37
   7  -3   2    1.78    0.21
  -7   3  -2    1.56    0.26
   7   3   2    2.00    0.37
   7   3   2    1.74    0.20
  -7   3  -2    2.29    0.39
  -8  -3  -2   -0.16    0.20
   8  -3   2    0.10    0.10
  -8   3  -2   -0.06    0.19
   8   3   2    0.08    0.10
  -8   3  -2   -0.17    0.21
  -9  -3  -2    0.02    0.47
  -9  -3  -2    0.22    0.37
   9  -3   2    0.27    0.14
   9   3   2    0.34    0.14
  -9   3  -2    0.35    0.34
   9  -4  -2    0.42    0.17
  -9  -4   2    0.07    0.33
  -9   4   2    0.03    0.31
   9   4  -2    0.43    0.14
   8  -4  -2    4.07    0.31
  -8  -4   2    4.30    0.62
   8   4  -2    3.26    0.25
   8   4  -2    3.78    0.41
  -8   4   2    3.51    0.51
  -7  -4   2    3.91    0.55
   7  -4  -2    3.71    0.28
  -7   4   2    3.57    0.20
  -7   4   2    4.33    0.53
   7   4  -2    4.41    0.26
  -7   4   2    3.80    0.20
   6  -4  -2    1.34    0.20
   6  -4  -2    1.74    0.15
  -6  -4   2    1.65    0.36
  -6   4   2    1.78    0.16
   6   4  -2    1.61    0.26
   6   4  -2    1.37    0.18
  -6   4   2    1.27    0.31
   5  -4  -2    1.56    0.13
   5  -4  -2    1.79    0.23
  -5  -4   2    1.52    0.30
  -5   4   2    1.91    0.15
   5   4  -2    1.43    0.16
  -5   4   2    1.90    0.31
   5   4  -2    1.89    0.25
   4  -4  -2   12.07    0.40
  -4  -4   2   11.16    0.54
  -4  -4   2   10.75    0.46
   4  -4  -2   11.47    0.30
   4   4  -2   11.64    0.36
  -4   4   2   10.94    0.52
   4   4  -2   11.23    0.34
  -4   4   2   11.69    0.32
   4   4  -2   11.12    0.45
   3  -4  -2   56.05    0.95
  -3  -4   2   58.41    1.28
   3  -4  -2   56.49    1.27
   3  -4  -2   57.11    1.09
  -3   4   2   55.43    1.09
   3   4  -2   56.48    1.02
   3   4  -2   54.55    1.18
   3   4  -2   53.40    1.18
  -3   4   2   56.33    0.99
   3   4  -2   57.82    1.03
  -3   4   2   57.73    1.28
  -2  -4   2   43.15    0.94
   2  -4  -2   41.86    0.83
   2  -4  -2   42.61    0.77
   2  -4  -2   42.12    0.94
  -2  -4   2   43.08    0.91
  -2   4   2   42.65    0.79
  -2   4   2   44.12    0.94
   2   4  -2   43.21    0.93
   2   4  -2   43.63    0.76
   2   4  -2   42.37    0.87
   1  -4  -2   14.77    0.38
  -1  -4   2   14.61    0.30
   1  -4  -2   14.63    0.37
  -1  -4   2   13.77    0.42
  -1  -4   2   14.45    0.35
   1  -4  -2   14.26    0.34
   1  -4  -2   13.99    0.37
   1   4  -2   14.29    0.28
  -1   4   2   14.65    0.37
   1   4  -2   14.46    0.43
   1   4  -2   14.45    0.34
   0  -4  -2    9.46    0.22
   0  -4   2    9.30    0.22
   0  -4   2    9.21    0.32
   0  -4  -2    9.39    0.24
   0  -4   2    9.40    0.22
   0  -4  -2    9.71    0.32
   0  -4   2    9.53    0.21
   0   4   2    9.28    0.23
   0   4   2    8.76    0.32
   0   4  -2    9.24    0.21
   0   4   2    8.93    0.22
   1  -4   2   20.50    0.53
  -1  -4  -2   20.47    0.38
   1  -4   2   19.87    0.41
  -1  -4  -2   20.06    0.55
   1  -4   2   20.86    0.47
  -1  -4  -2   20.65    0.45
  -1   4  -2   20.63    0.52
  -1   4  -2   20.88    0.45
  -1   4  -2   20.31    0.42
   1   4   2   20.06    0.57
   1   4   2   20.34    0.38
   1   4   2   20.01    0.43
  -2  -4  -2   38.10    0.83
  -2  -4  -2   37.83    0.89
   2  -4   2   38.39    0.83
  -2  -4  -2   37.73    0.68
   2  -4   2   38.52    0.86
   2  -4   2   37.28    0.73
   2   4   2   38.75    0.94
  -2   4  -2   37.97    0.84
   2   4   2   39.00    0.68
  -2   4  -2   39.22    0.86
   2   4   2   37.99    0.79
  -3  -4  -2   24.29    0.51
   3  -4   2   24.50    0.72
  -3  -4  -2   22.68    0.69
  -3  -4  -2   25.07    0.72
   3  -4   2   24.06    0.56
  -3   4  -2   24.61    0.62
   3   4   2   23.31    0.50
  -3   4  -2   24.73    0.72
   3   4   2   23.77    0.64
   3   4   2   24.59    0.76
  -3   4  -2   24.41    0.65
  -4  -4  -2   10.88    0.53
   4  -4   2   10.94    0.37
  -4  -4  -2   10.51    0.33
   4   4   2   10.86    0.32
  -4   4  -2   10.41    0.38
  -4   4  -2   11.57    0.50
   4   4   2   11.30    0.54
  -4   4  -2   10.30    0.50
  -5  -4  -2    0.11    0.17
   5  -4   2    0.17    0.09
  -5   4  -2    0.23    0.11
   5   4   2    0.27    0.07
  -5   4  -2    0.14    0.14
   5   4   2    0.35    0.19
  -5   4  -2    0.43    0.17
   6  -4   2    3.12    0.23
  -6  -4  -2    3.49    0.47
  -6   4  -2    3.03    0.24
  -6   4  -2    3.01    0.28
  -6   4  -2    2.62    0.39
   6   4   2    3.28    0.24
   6   4   2    3.24    0.42
   7  -4   2    0.28    0.12
  -7  -4  -2   -0.39    0.16
   7   4   2    0.09    0.18
  -7   4  -2    0.12    0.16
   7   4   2    0.13    0.08
  -7   4  -2    0.16    0.16
  -7   4  -2   -0.01    0.15
  -8  -4  -2    0.05    0.27
   8  -4   2    0.02    0.10
  -8   4  -2    0.10    0.21
   8   4   2   -0.02    0.22
  -8   4  -2    0.03    0.19
   8   4   2    0.04    0.11
  -9  -4  -2    0.74    0.40
   9  -4   2    0.18    0.14
   9   4   2    0.59    0.16
   9  -5  -2    2.83    0.32
   9   5  -2    2.41    0.40
   9   5  -2    2.04    0.25
  -8  -5   2    0.10    0.24
   8  -5  -2   -0.03    0.13
   8   5  -2    0.34    0.21
   8   5  -2   -0.03    0.11
  -8   5   2    0.51    0.27
  -7  -5   2    0.08    0.24
   7  -5  -2    0.10    0.10
   7   5  -2    0.35    0.21
  -7   5   2    0.35    0.21
   7   5  -2    0.30    0.11
  -6  -5   2    3.97    0.49
   6  -5  -2    3.99    0.28
  -6   5   2    5.40    0.52
   6   5  -2    3.85    0.35
   6   5  -2    4.23    0.24
  -5  -5   2   19.95    0.85
   5  -5  -2   20.16    0.42
   5  -5  -2   21.24    0.61
  -5   5   2   20.90    0.43
  -5   5   2   21.04    0.83
   5   5  -2   20.25    0.53
   5   5  -2   20.45    0.71
   4  -5  -2   16.79    0.50
  -4  -5   2   16.92    0.66
   4  -5  -2   15.63    0.33
   4   5  -2   17.00    0.58
  -4   5   2   15.28    0.64
   4   5  -2   16.14    0.43
   4   5  -2   16.47    0.42
   3  -5  -2  100.46    1.58
  -3  -5   2  100.82    1.95
  -3  -5   2   97.52    1.92
   3  -5  -2  101.58    2.11
   3  -5  -2  101.40    1.79
  -3   5   2  105.00    1.99
   3   5  -2   99.21    1.68
   3   5  -2   98.58    1.89
   3   5  -2   96.68    1.86
   3   5  -2  100.79    1.68
  -2  -5   2   17.98    0.54
   2  -5  -2   17.94    0.53
   2  -5  -2   16.96    0.38
   2  -5  -2   17.75    0.38
  -2  -5   2   18.09    0.50
   2  -5  -2   17.34    0.44
  -2  -5   2   17.52    0.37
   2   5  -2   17.17    0.52
  -2   5   2   17.49    0.52
   2   5  -2   18.12    0.48
   2   5  -2   17.64    0.36
  -1  -5   2    9.25    0.21
   1  -5  -2    9.64    0.30
   1  -5  -2    9.39    0.26
  -1  -5   2    9.59    0.35
  -1  -5   2    9.18    0.27
   1  -5  -2    9.34    0.26
   1  -5  -2    9.11    0.28
   1   5  -2    9.43    0.20
   1   5  -2    8.95    0.34
   1   5  -2    9.21    0.26
  -1   5   2    8.92    0.28
   0  -5  -2  949.92   15.10
   0  -5   2  913.72   18.05
   0   5  -2 1000.00   18.58
  -1  -5  -2    2.72    0.14
   1  -5   2    2.60    0.17
  -1  -5  -2    2.48    0.18
   1  -5   2    2.59    0.15
  -1  -5  -2    2.44    0.09
   1  -5   2    2.40    0.11
   1   5   2    2.42    0.09
   1   5   2    2.22    0.21
   1   5   2    2.48    0.13
  -1   5  -2    2.73    0.14
  -1   5  -2    2.50    0.17
  -1   5  -2    2.32    0.11
   2  -5   2   50.62    1.07
  -2  -5  -2   49.65    1.03
   2  -5   2   50.01    1.03
   2  -5   2   50.14    0.93
  -2  -5  -2   51.34    0.86
  -2   5  -2   50.27    0.94
   2   5   2   49.45    0.99
  -2   5  -2   50.90    1.03
   2   5   2   51.55    1.16
  -2   5  -2   50.16    1.04
   2   5   2   51.02    0.86
   3  -5   2    3.30    0.26
   3  -5   2    2.98    0.17
  -3  -5  -2    3.57    0.28
  -3  -5  -2    3.14    0.14
  -3  -5  -2    3.10    0.26
  -3   5  -2    3.20    0.22
  -3   5  -2    2.90    0.20
  -3   5  -2    3.29    0.27
   3   5   2    3.00    0.22
   3   5   2    3.40    0.31
   3   5   2    2.99    0.13
   4  -5   2    4.72    0.24
  -4  -5  -2    4.97    0.21
  -4  -5  -2    4.95    0.37
  -4   5  -2    4.79    0.35
  -4   5  -2    5.28    0.25
   4   5   2    5.18    0.20
   4   5   2    4.75    0.36
  -4   5  -2    4.96    0.28
  -5  -5  -2   -0.21    0.14
   5  -5   2   -0.02    0.06
   5   5   2   -0.04    0.05
  -5   5  -2    0.20    0.09
  -5   5  -2    0.16    0.16
   5   5   2    0.05    0.13
  -5   5  -2    0.06    0.11
   6  -5   2   11.44    0.44
  -6  -5  -2   10.34    0.68
  -6   5  -2   11.62    0.48
  -6   5  -2   10.58    0.56
  -6   5  -2   11.98    0.68
   6   5   2   11.07    0.38
   6   5   2   12.36    0.66
   7  -5   2    0.30    0.12
  -7  -5  -2    0.48    0.28
  -7   5  -2    0.24    0.20
   7   5   2    0.44    0.24
   7   5   2    0.45    0.12
  -7   5  -2    0.29    0.16
   8  -5   2    1.34    0.21
  -8  -5  -2    1.42    0.37
   8   5   2    1.32    0.34
   8   5   2    1.31    0.19
  -8   5  -2    1.05    0.33
   9  -5   2    1.20    0.23
   9   5   2    1.22    0.21
   9  -6  -2    7.04    0.43
   9   6  -2    6.75    0.59
  -8  -6   2    0.28    0.27
   8  -6  -2   -0.02    0.11
   8   6  -2    0.04    0.16
  -8   6   2    0.05    0.23
   8   6  -2   -0.03    0.09
  -7  -6   2    1.25    0.37
   7  -6  -2    1.13    0.19
  -7   6   2    1.38    0.33
   7   6  -2    1.13    0.17
   7   6  -2    1.33    0.29
   6  -6  -2   38.81    0.97
  -6  -6   2   39.17    1.34
   6   6  -2   39.16    0.86
  -6   6   2   36.83    1.38
   6   6  -2   37.39    1.12
  -5  -6   2    0.25    0.22
   5  -6  -2    0.40    0.12
  -5   6   2    0.24    0.16
   5   6  -2    0.48    0.16
   5   6  -2    0.31    0.08
   4  -6  -2    6.93    0.30
  -4  -6   2    6.55    0.42
  -4   6   2    7.42    0.44
   4   6  -2    6.69    0.24
   4   6  -2    7.32    0.26
   4   6  -2    6.68    0.37
   3  -6  -2    7.20    0.29
  -3  -6   2    6.40    0.37
  -3  -6   2    7.19    0.38
   3   6  -2    7.10    0.23
   3   6  -2    6.84    0.36
  -3   6   2    7.79    0.39
   3   6  -2    7.20    0.22
   2  -6  -2   18.92    0.42
   2  -6  -2   20.38    0.41
  -2  -6   2   19.63    0.40
   2  -6  -2   19.83    0.48
   2  -6  -2   18.30    0.62
   2   6  -2   19.59    0.38
   2   6  -2   19.58    0.58
  -2   6   2   18.96    0.48
  -2   6   2   19.00    0.56
  -1  -6   2   35.48    0.72
   1  -6  -2   35.06    0.75
   1  -6  -2   36.79    0.70
   1  -6  -2   36.07    0.70
  -1  -6   2   36.26    0.83
   1  -6  -2   35.77    0.73
  -1  -6   2   36.05    0.62
  -1   6   2   35.27    0.75
  -1   6   2   36.26    0.74
   1   6  -2   35.24    0.70
   1   6  -2   35.75    0.61
   1   6  -2   36.43    0.83
   0  -6   2  316.85    8.18
   0  -6  -2  311.81    5.57
   0   6   2  312.46    5.81
   0   6  -2  331.86    9.71
   1  -6   2    1.67    0.12
  -1  -6  -2    1.46    0.11
   1  -6   2    1.36    0.13
  -1  -6  -2    1.38    0.06
  -1  -6  -2    1.60    0.18
  -1   6  -2    1.50    0.09
   1   6   2    1.45    0.18
   1   6   2    1.45    0.07
  -1   6  -2    1.32    0.13
  -1   6  -2    1.56    0.11
   1   6   2    1.36    0.10
   2  -6   2   13.88    0.46
  -2  -6  -2   13.38    0.49
  -2  -6  -2   13.28    0.29
   2  -6   2   13.16    0.36
  -2  -6  -2   13.78    0.43
   2  -6   2   13.26    0.43
  -2   6  -2   13.43    0.36
   2   6   2   13.68    0.52
  -2   6  -2   14.02    0.45
  -2   6  -2   14.45    0.43
   2   6   2   13.44    0.29
   3  -6   2    1.75    0.14
  -3  -6  -2    1.89    0.24
  -3  -6  -2    1.79    0.11
   3  -6   2    1.73    0.24
  -3   6  -2    1.47    0.17
  -3   6  -2    1.61    0.21
   3   6   2    2.16    0.28
  -3   6  -2    1.66    0.19
   4  -6   2    2.03    0.16
  -4  -6  -2    1.84    0.28
  -4  -6  -2    1.58    0.12
  -4   6  -2    1.86    0.16
   4   6   2    1.70    0.27
  -4   6  -2    2.01    0.18
  -4   6  -2    1.53    0.24
   4   6   2    1.70    0.11
  -5  -6  -2    0.31    0.19
   5  -6   2    0.36    0.11
  -5   6  -2    0.05    0.13
   5   6   2    0.21    0.16
  -5   6  -2    0.20    0.11
   5   6   2    0.26    0.08
  -5   6  -2    0.47    0.12
   6  -6   2    0.90    0.16
  -6  -6  -2    1.09    0.30
  -6   6  -2    1.60    0.18
   6   6   2    1.56    0.15
  -6   6  -2    1.18    0.29
  -6   6  -2    0.77    0.21
   6   6   2    0.73    0.25
  -7  -6  -2   11.27    0.86
   7  -6   2   10.72    0.46
  -7   6  -2   10.35    0.68
   7   6   2   11.49    0.40
   7   6   2    9.86    0.66
  -7   6  -2   10.42    0.37
  -8  -6  -2   -0.02    0.28
   8  -6   2    0.03    0.09
   8   6   2    0.21    0.24
  -8   6  -2    0.15    0.21
   8   6   2    0.25    0.11
  -9  -6  -2    3.23    0.60
   9  -6   2    3.66    0.32
  -9   6  -2    3.98    0.86
   9   6   2    2.82    0.53
   9   6   2    3.26    0.27
   9  -7  -2    1.88    0.29
  -9  -7   2    1.92    0.47
   9   7  -2    1.46    0.36
  -9   7   2    1.49    0.48
   9   7  -2    2.15    0.23
  -8  -7   2    1.28    0.41
   8  -7  -2    1.00    0.22
   8   7  -2    1.13    0.32
  -8   7   2    0.88    0.29
   8   7  -2    1.61    0.19
   7  -7  -2    2.18    0.26
   7   7  -2    2.14    0.19
   7   7  -2    2.30    0.37
  -6  -7   2   25.92    1.07
   6  -7  -2   26.49    0.77
  -6   7   2   25.16    1.01
   6   7  -2   27.70    0.66
   6   7  -2   26.52    0.93
  -5  -7   2    3.28    0.42
   5  -7  -2    3.33    0.24
  -5   7   2    3.24    0.34
   5   7  -2    3.52    0.33
   5   7  -2    3.37    0.19
   4  -7  -2   -0.05    0.06
  -4  -7   2   -0.03    0.12
   4   7  -2    0.12    0.12
   4   7  -2    0.08    0.05
  -4   7   2    0.07    0.10
   4   7  -2    0.06    0.05
   3  -7  -2   55.85    1.10
  -3  -7   2   55.70    1.25
  -3  -7   2   53.54    1.26
   3   7  -2   54.32    0.96
   3   7  -2   55.54    1.25
   3   7  -2   54.38    0.96
  -3   7   2   55.45    1.26
   2  -7  -2   10.82    0.42
   2  -7  -2   11.06    0.31
  -2  -7   2   11.13    0.39
  -2  -7   2   11.94    0.46
   2  -7  -2   10.91    0.28
   2  -7  -2   11.73    0.35
  -2  -7   2   11.23    0.26
  -2   7   2   10.56    0.34
   2   7  -2   10.80    0.24
   2   7  -2   10.79    0.44
   2   7  -2   10.97    0.36
  -2   7   2   11.23    0.41
   1  -7  -2    9.52    0.33
   1  -7  -2   10.22    0.29
  -1  -7   2    9.89    0.21
  -1  -7   2    9.88    0.39
   1  -7  -2    9.92    0.31
  -1   7   2    9.94    0.33
   1   7  -2    9.52    0.29
   1   7  -2   10.33    0.39
  -1   7   2    9.56    0.31
   1   7  -2    9.92    0.21
   0  -7   2   14.95    0.38
   0  -7   2   15.84    0.32
   0  -7  -2   15.63    0.46
   0  -7  -2   15.26    0.39
   0  -7   2   15.67    0.47
   0  -7   2   15.82    0.38
   0  -7  -2   15.69    0.34
   0   7   2   16.42    0.49
   0   7  -2   16.13    0.33
   0   7   2   16.20    0.39
   0   7  -2   16.23    0.48
   0   7   2   15.58    0.35
  -1  -7  -2    3.35    0.22
   1  -7   2    3.12    0.20
   1  -7   2    3.12    0.13
   1  -7   2    3.11    0.17
  -1  -7  -2    3.07    0.10
  -1  -7  -2    3.15    0.17
  -1   7  -2    3.13    0.16
   1   7   2    3.24    0.11
  -1   7  -2    3.03    0.14
  -1   7  -2    3.02    0.19
   1   7   2    3.22    0.16
   1   7   2    3.49    0.24
  -2  -7  -2    6.90    0.17
   2  -7   2    5.91    0.29
  -2  -7  -2    6.70    0.35
  -2  -7  -2    6.89    0.31
   2  -7   2    7.21    0.25
   2  -7   2    7.17    0.34
  -2   7  -2    6.52    0.24
  -2   7  -2    6.74    0.30
   2   7   2    6.71    0.17
   2   7   2    7.05    0.39
  -2   7  -2    6.79    0.30
   2   7   2    7.01    0.28
  -3  -7  -2    5.64    0.33
  -3  -7  -2    5.90    0.19
   3  -7   2    6.66    0.26
  -3   7  -2    6.02    0.28
  -3   7  -2    5.67    0.27
  -3   7  -2    5.90    0.34
   3   7   2    5.44    0.37
   3   7   2    6.02    0.18
  -4  -7  -2    3.67    0.32
  -4  -7  -2    3.57    0.17
   4  -7   2    3.71    0.22
  -4   7  -2    3.44    0.29
   4   7   2    3.24    0.32
   4   7   2    3.71    0.16
  -4   7  -2    3.78    0.21
  -4   7  -2    4.00    0.23
   5  -7   2    0.08    0.08
  -5  -7  -2    0.15    0.17
  -5   7  -2    0.05    0.09
   5   7   2    0.20    0.18
   5   7   2    0.03    0.05
  -5   7  -2   -0.10    0.11
  -5   7  -2   -0.07    0.08
  -6  -7  -2    5.61    0.52
   6  -7   2    5.04    0.31
  -6   7  -2    5.86    0.26
  -6   7  -2    5.45    0.29
   6   7   2    4.96    0.48
  -6   7  -2    6.08    0.48
   6   7   2    6.09    0.26
   7  -7   2    1.99    0.27
   7   7   2    1.94    0.17
  -7   7  -2    1.66    0.17
  -7   7  -2    1.90    0.43
   7   7   2    1.79    0.37
  -7   7  -2    2.14    0.18
   8  -7   2    1.20    0.21
  -8  -7  -2    0.96    0.30
  -8   7  -2    1.05    0.35
   8   7   2    1.66    0.19
   8   7   2    1.73    0.34
   9  -7   2    0.51    0.20
  -9  -7  -2    0.35    0.37
   9   7   2   -0.07    0.32
  -9   7  -2   -0.06    0.24
   9   7   2    0.66    0.17
  -9  -8   2    0.02    0.32
   9  -8  -2    0.19    0.15
  -9   8   2   -0.17    0.23
   9   8  -2    0.50    0.33
   9   8  -2    0.37    0.14
  -8  -8   2    1.87    0.43
   8  -8  -2    1.66    0.25
   8   8  -2    1.31    0.29
  -8   8   2    1.12    0.31
   8   8  -2    1.55    0.19
  -7  -8   2    2.16    0.42
   7  -8  -2    2.29    0.28
   7   8  -2    2.77    0.20
  -7   8   2    1.60    0.35
   7   8  -2    2.97    0.41
  -6  -8   2   39.21    1.33
   6  -8  -2   37.20    0.97
   6   8  -2   37.69    0.81
   6   8  -2   38.41    1.18
  -6   8   2   35.39    1.23
   5  -8  -2   10.60    0.43
  -5  -8   2   11.01    0.62
  -5   8   2   10.08    0.57
   5   8  -2   11.00    0.33
   5   8  -2   10.69    0.55
   5   8  -2   10.58    0.35
   4  -8  -2    0.09    0.08
  -4  -8   2    0.04    0.13
   4   8  -2    0.27    0.14
  -4   8   2    0.01    0.11
   4   8  -2    0.16    0.06
   4   8  -2    0.08    0.05
  -3  -8   2   10.78    0.46
   3  -8  -2   10.81    0.37
   3   8  -2   10.59    0.27
   3   8  -2   11.87    0.49
   3   8  -2   10.67    0.27
  -3   8   2   10.94    0.48
   2  -8  -2   45.42    0.86
   2  -8  -2   45.19    1.03
  -2  -8   2   44.69    0.77
  -2  -8   2   44.90    0.97
   2  -8  -2   45.20    0.90
  -2  -8   2   44.38    1.07
   2  -8  -2   42.65    0.83
   2   8  -2   43.89    0.93
  -2   8   2   46.34    1.00
   2   8  -2   43.97    0.74
   2   8  -2   43.33    1.04
  -2   8   2   43.35    0.89
   1  -8  -2    8.99    0.28
   1  -8  -2    9.21    0.27
  -1  -8   2    9.24    0.20
  -1  -8   2    8.97    0.30
   1  -8  -2    8.55    0.32
   1  -8  -2    8.78    0.30
  -1   8   2    8.46    0.32
   1   8  -2    8.82    0.20
   1   8  -2    8.98    0.29
   1   8  -2    9.35    0.38
  -1   8   2    8.73    0.30
   0  -8   2   16.88    0.35
   0  -8   2   16.67    0.42
   0  -8   2   15.66    0.50
   0  -8  -2   17.03    0.43
   0  -8  -2   17.22    0.36
   0  -8  -2   16.67    0.49
   0   8   2   17.24    0.37
   0   8  -2   16.08    0.34
   0   8  -2   16.33    0.50
  -1  -8  -2   22.44    0.54
  -1  -8  -2   22.00    0.41
   1  -8   2   21.89    0.60
   1  -8   2   22.44    0.47
  -1  -8  -2   23.22    0.73
   1  -8   2   22.97    0.56
   1   8   2   22.41    0.67
   1   8   2   22.11    0.53
  -1   8  -2   22.47    0.59
   1   8   2   22.24    0.43
  -1   8  -2   23.13    0.54
  -1   8  -2   21.71    0.48
   2  -8   2    2.53    0.22
   2  -8   2    2.85    0.22
  -2  -8  -2    2.96    0.10
  -2  -8  -2    3.25    0.27
   2  -8   2    3.08    0.16
  -2  -8  -2    2.65    0.21
  -2   8  -2    2.68    0.21
   2   8   2    3.03    0.19
  -2   8  -2    3.04    0.17
  -2   8  -2    2.90    0.21
   2   8   2    2.93    0.11
   2   8   2    3.12    0.29
  -3  -8  -2   52.08    0.91
   3  -8   2   52.86    1.04
   3  -8   2   51.19    1.06
  -3  -8  -2   50.85    1.19
   3   8   2   52.18    0.90
   3   8   2   52.95    1.32
  -3   8  -2   51.63    1.04
  -3   8  -2   53.04    1.21
  -4  -8  -2    8.41    0.29
  -4  -8  -2    8.38    0.47
   4  -8   2    8.48    0.34
   4   8   2    8.05    0.24
   4   8   2    8.89    0.51
  -4   8  -2    8.07    0.30
  -4   8  -2    7.63    0.43
  -4   8  -2    8.09    0.31
   5  -8   2    4.47    0.26
  -5  -8  -2    4.62    0.42
  -5   8  -2    4.36    0.24
  -5   8  -2    4.28    0.21
   5   8   2    4.49    0.41
   5   8   2    4.38    0.19
  -5   8  -2    4.07    0.36
  -6  -8  -2    8.26    0.64
   6  -8   2    8.49    0.39
  -6   8  -2    8.78    0.28
  -6   8  -2    7.92    0.30
   6   8   2    9.38    0.32
   6   8   2    9.45    0.61
  -6   8  -2    9.16    0.58
   7  -8   2    3.80    0.29
  -7  -8  -2    4.10    0.53
   7   8   2    3.55    0.22
   7   8   2    3.89    0.51
  -8  -8  -2    1.15    0.35
   8  -8   2    0.87    0.18
   8   8   2    1.23    0.18
   8   8   2    1.12    0.32
  -8   8  -2    0.60    0.29
   9  -8   2    0.42    0.20
  -9  -8  -2    0.41    0.36
  -9   8  -2    0.94    0.33
   9   8   2    1.02    0.19
   9   8   2    0.46    0.37
  -9  -9   2    1.77    0.50
   9   9  -2    1.90    0.22
   9   9  -2    1.71    0.40
  -9   9   2    2.38    0.48
  -8  -9   2    0.74    0.34
   8  -9  -2    0.31    0.13
   8   9  -2    0.28    0.22
   8   9  -2    0.41    0.12
  -8   9   2    0.37    0.24
  -7  -9   2    0.71    0.31
   7   9  -2    1.32    0.16
   7   9  -2    1.28    0.32
  -7   9   2    1.14    0.26
  -6  -9   2   45.22    1.46
   6  -9  -2   42.55    1.08
   6   9  -2   44.90    1.32
  -6   9   2   45.69    1.40
   6   9  -2   43.90    0.90
  -5  -9   2    5.32    0.45
   5  -9  -2    4.91    0.29
   5   9  -2    4.97    0.22
  -5   9   2    5.16    0.42
   5   9  -2    5.21    0.21
   4  -9  -2    0.13    0.09
  -4  -9   2    0.13    0.14
  -4   9   2    0.16    0.11
   4   9  -2    0.12    0.05
   4   9  -2    0.16    0.06
   4   9  -2    0.32    0.16
  -3  -9   2    2.07    0.25
   3  -9  -2    2.20    0.18
   3   9  -2    1.90    0.25
   3   9  -2    2.24    0.11
   3   9  -2    2.38    0.10
  -3   9   2    1.99    0.21
  -2  -9   2  160.59    2.46
   2  -9  -2  153.60    2.79
  -2  -9   2  154.51    2.85
  -2  -9   2  159.75    2.73
   2  -9  -2  154.69    2.53
   2  -9  -2  158.41    2.63
  -2   9   2  155.38    2.59
  -2   9   2  157.93    2.76
  -2   9   2  155.99    2.63
   2   9  -2  159.84    2.85
   2   9  -2  159.98    2.44
   2   9  -2  158.16    2.68
   1  -9  -2   84.34    1.50
   1  -9  -2   83.96    1.45
   1  -9  -2   82.18    1.55
   1  -9  -2   83.64    1.44
  -1  -9   2   83.74    1.51
  -1  -9   2   82.76    1.33
  -1  -9   2   80.25    1.64
   1   9  -2   81.55    1.32
   1   9  -2   83.36    1.63
  -1   9   2   82.52    1.54
  -1   9   2   85.73    1.53
   0  -9  -2    5.50    0.27
   0  -9   2    5.55    0.30
   0  -9   2    5.33    0.16
   0  -9  -2    5.41    0.18
   0  -9   2    5.50    0.22
   0  -9  -2    5.50    0.18
   0  -9  -2    5.44    0.23
   0  -9   2    5.45    0.23
   0   9  -2    5.66    0.30
   0   9  -2    5.51    0.17
   0   9   2    5.41    0.29
  -1  -9  -2    0.14    0.13
  -1  -9  -2    0.16    0.07
   1  -9   2    0.19    0.05
   1  -9   2    0.16    0.08
  -1  -9  -2    0.16    0.03
   1  -9   2    0.07    0.11
   1   9   2    0.12    0.06
  -1   9  -2    0.20    0.06
   1   9   2    0.21    0.13
   1   9   2    0.16    0.05
  -1   9  -2    0.30    0.15
  -1   9  -2    0.08    0.06
   2  -9   2   32.69    0.70
   2  -9   2   34.61    0.85
  -2  -9  -2   33.24    0.57
  -2  -9  -2   33.07    0.80
   2  -9   2   33.62    0.81
  -2   9  -2   33.13    0.71
   2   9   2   33.17    0.76
   2   9   2   33.90    0.95
  -2   9  -2   31.98    0.76
  -2   9  -2   33.39    0.80
   2   9   2   33.30    0.58
  -3  -9  -2    3.11    0.26
   3  -9   2    2.86    0.18
  -3  -9  -2    3.16    0.12
   3  -9   2    2.73    0.20
   3   9   2    3.10    0.12
  -3   9  -2    3.30    0.26
  -3   9  -2    3.04    0.20
   3   9   2    3.45    0.32
  -4  -9  -2    1.15    0.24
   4  -9   2    1.02    0.15
  -4  -9  -2    1.15    0.10
   4   9   2    1.00    0.25
  -4   9  -2    1.06    0.13
  -4   9  -2    0.98    0.22
   4   9   2    1.16    0.09
  -4   9  -2    0.77    0.13
   5  -9   2    0.22    0.10
  -5  -9  -2    0.05    0.07
  -5  -9  -2    0.07    0.18
  -5   9  -2    0.18    0.09
   5   9   2    0.16    0.18
  -5   9  -2    0.15    0.07
  -5   9  -2    0.19    0.14
   5   9   2    0.15    0.06
  -6  -9  -2    0.29    0.26
   6  -9   2    0.13    0.11
   6   9   2    0.27    0.08
  -6   9  -2    0.31    0.18
  -6   9  -2    0.16    0.06
   6   9   2    0.16    0.17
   7  -9   2    0.91    0.19
  -7  -9  -2    0.67    0.30
   7   9   2    1.00    0.28
  -7   9  -2    1.12    0.28
   7   9   2    1.10    0.15
   8  -9   2   -0.02    0.10
  -8  -9  -2    0.18    0.26
  -8   9  -2    0.16    0.21
   8   9   2    0.11    0.24
   8   9   2    0.09    0.10
   9  -9   2    1.66    0.27
  -9  -9  -2    1.57    0.47
   9   9   2    0.88    0.40
  -9   9  -2    1.57    0.40
   9   9   2    1.71    0.22
  -9 -10   2    0.22    0.37
   9 -10  -2    0.80    0.21
  -9  10   2    0.54    0.33
   9  10  -2    1.17    0.36
  -8 -10   2    0.16    0.28
   8 -10  -2    0.14    0.12
   8  10  -2    0.26    0.11
   8  10  -2    0.44    0.27
  -8  10   2    0.53    0.26
  -7 -10   2    0.98    0.34
   7 -10  -2    1.34    0.22
   7  10  -2    1.23    0.15
   7  10  -2    1.20    0.30
  -7  10   2    1.31    0.29
  -6 -10   2    6.04    0.56
   6 -10  -2    6.67    0.37
  -6  10   2    5.78    0.48
   6  10  -2    6.26    0.25
   6  10  -2    5.74    0.46
  -5 -10   2   13.21    0.67
   5 -10  -2   13.04    0.49
  -5  10   2   12.53    0.64
   5  10  -2   12.04    0.35
   5  10  -2   12.63    0.34
   5  10  -2   12.20    0.62
   4 -10  -2    8.52    0.43
   4  10  -2    8.58    0.24
   4  10  -2    8.30    0.24
   4  10  -2    8.00    0.47
  -3 -10   2   38.02    0.98
   3 -10  -2   38.26    0.86
   3  10  -2   38.05    1.02
  -3  10   2   37.57    0.98
   3  10  -2   37.31    0.66
   3  10  -2   37.26    0.66
  -2 -10   2  128.09    2.26
   2 -10  -2  123.18    2.06
   2 -10  -2  124.35    2.15
  -2 -10   2  125.25    1.96
  -2  10   2  126.51    2.28
  -2  10   2  120.54    2.14
  -2  10   2  125.97    2.14
   2  10  -2  124.97    2.37
   2  10  -2  125.81    1.94
   1 -10  -2   18.48    0.45
  -1 -10   2   18.38    0.50
  -1 -10   2   18.49    0.62
   1 -10  -2   18.74    0.46
   1 -10  -2   18.17    0.50
   1 -10  -2   17.91    0.53
  -1 -10   2   18.73    0.35
   1  10  -2   18.62    0.61
  -1  10   2   17.79    0.51
   1  10  -2   17.91    0.49
  -1  10   2   18.73    0.54
   1  10  -2   18.57    0.35
   0 -10  -2   -0.03    0.06
   0 -10   2   -0.05    0.05
   0 -10  -2    0.06    0.07
   0 -10   2    0.09    0.04
   0 -10  -2    0.14    0.05
   0 -10  -2   -0.13    0.09
   0 -10  -2    0.09    0.06
   0 -10   2    0.15    0.07
   0  10   2   -0.04    0.10
   0  10  -2    0.03    0.13
   0  10  -2    0.06    0.04
   1 -10   2   13.69    0.44
   1 -10   2   13.26    0.34
  -1 -10  -2   13.59    0.42
   1 -10   2   13.28    0.47
  -1 -10  -2   12.82    0.49
  -1 -10  -2   13.02    0.27
   1  10   2   13.69    0.41
   1  10   2   13.30    0.30
   1  10   2   13.07    0.53
  -1  10  -2   13.81    0.41
  -1  10  -2   12.68    0.39
  -1  10  -2   13.38    0.46
   2 -10   2    4.01    0.27
  -2 -10  -2    3.42    0.24
   2 -10   2    3.43    0.24
   2 -10   2    3.61    0.18
  -2 -10  -2    3.74    0.11
  -2  10  -2    3.57    0.24
   2  10   2    3.62    0.12
  -2  10  -2    3.91    0.25
   2  10   2    3.74    0.32
   3 -10   2    4.54    0.23
   3 -10   2    4.44    0.24
  -3 -10  -2    4.35    0.30
  -3 -10  -2    4.46    0.14
  -3  10  -2    4.52    0.29
   3  10   2    4.52    0.36
   3  10   2    4.53    0.14
  -3  10  -2    4.73    0.24
   4 -10   2   47.29    1.03
  -4 -10  -2   46.84    0.87
  -4  10  -2   46.84    0.94
  -4  10  -2   49.17    1.25
  -4  10  -2   47.89    0.96
   4  10   2   48.48    0.85
   4  10   2   45.80    1.36
  -5 -10  -2   19.34    0.82
   5 -10   2   18.33    0.58
  -5 -10  -2   17.86    0.46
  -5  10  -2   17.77    0.41
  -5  10  -2   18.42    0.43
   5  10   2   18.40    0.43
  -5  10  -2   18.13    0.76
   5  10   2   17.02    0.82
  -6 -10  -2    1.16    0.34
   6 -10   2    1.12    0.19
   6  10   2    1.31    0.12
  -6  10  -2    1.31    0.29
   6  10   2    1.71    0.34
  -7 -10  -2    2.24    0.46
   7 -10   2    2.02    0.25
   7  10   2    2.18    0.17
  -7  10  -2    2.72    0.42
   7  10   2    1.59    0.38
   8 -10   2    0.09    0.13
  -8 -10  -2    0.05    0.24
   8  10   2    0.38    0.10
   8  10   2    0.38    0.29
  -8  10  -2    0.06    0.22
  -9 -10  -2   -0.26    0.37
   9 -10   2    0.57    0.17
   9  10   2    0.10    0.31
  -9  10  -2   -0.25    0.26
  -9 -11   2    0.16    0.34
   9 -11  -2    0.65    0.20
  -9  11   2    0.19    0.29
   9  11  -2    0.85    0.34
   8 -11  -2   -0.13    0.10
  -8 -11   2   -0.06    0.28
   8  11  -2    0.07    0.09
  -8  11   2    0.16    0.22
  -7 -11   2    2.35    0.46
   7 -11  -2    2.44    0.29
   7  11  -2    2.89    0.18
  -7  11   2    2.52    0.41
   7  11  -2    2.97    0.42
  -6 -11   2    1.95    0.38
   6 -11  -2    2.31    0.27
   6  11  -2    2.75    0.40
  -6  11   2    1.71    0.32
   6  11  -2    2.07    0.14
   5 -11  -2    5.47    0.32
  -5 -11   2    4.92    0.44
   5  11  -2    5.58    0.20
  -5  11   2    5.78    0.45
   5  11  -2    5.88    0.46
   4 -11  -2    2.38    0.21
  -4 -11   2    2.92    0.31
   4  11  -2    2.72    0.12
   4  11  -2    2.56    0.12
   4  11  -2    2.48    0.33
  -4  11   2    2.71    0.28
   3 -11  -2    2.75    0.11
   3 -11  -2    3.15    0.21
  -3 -11   2    2.53    0.24
  -3  11   2    3.16    0.25
   3  11  -2    2.88    0.09
   3  11  -2    2.55    0.27
   3  11  -2    2.96    0.10
  -2 -11   2    7.78    0.18
  -2 -11   2    7.49    0.35
   2 -11  -2    7.67    0.30
   2 -11  -2    7.74    0.27
   2  11  -2    7.82    0.16
   2  11  -2    8.33    0.43
  -2  11   2    7.71    0.35
  -2  11   2    7.79    0.31
  -1 -11   2    0.05    0.07
   1 -11  -2    0.11    0.09
  -1 -11   2    0.05    0.03
  -1 -11   2   -0.01    0.15
   1 -11  -2    0.11    0.08
   1 -11  -2    0.12    0.08
   1 -11  -2    0.02    0.09
  -1  11   2   -0.12    0.10
   1  11  -2   -0.02    0.03
  -1  11   2    0.06    0.08
   1  11  -2   -0.07    0.05
   1  11  -2    0.18    0.16
   0 -11  -2   44.73    1.04
   0 -11   2   47.22    1.10
   0 -11  -2   47.74    0.99
   0 -11  -2   47.22    0.99
   0 -11  -2   46.87    0.86
   0 -11  -2   46.89    0.86
   0 -11   2   47.20    0.83
   0 -11   2   47.48    0.97
   0 -11   2   46.10    0.97
   0  11  -2   47.20    0.84
   0  11   2   48.15    1.11
   0  11  -2   47.22    1.08
   1 -11   2   89.19    1.72
   1 -11   2   87.74    1.67
  -1 -11  -2   88.78    1.65
   1 -11   2   89.38    1.51
  -1 -11  -2   87.12    1.76
  -1 -11  -2   88.45    1.42
  -1  11  -2   87.65    1.63
  -1  11  -2   88.74    1.53
  -1  11  -2   90.35    1.70
   1  11   2   86.70    1.82
  -2 -11  -2   40.79    0.96
   2 -11   2   40.55    0.95
  -2 -11  -2   41.10    0.68
   2 -11   2   41.88    0.84
   2  11   2   41.04    0.70
  -2  11  -2   39.98    0.94
   2  11   2   41.52    1.13
   3 -11   2   59.89    1.19
  -3 -11  -2   61.46    1.37
   3 -11   2   59.08    1.23
  -3 -11  -2   59.33    1.00
   3  11   2   59.31    1.51
  -3  11  -2   60.82    1.17
  -3  11  -2   60.73    1.35
   3  11   2   59.77    0.99
  -4 -11  -2   45.99    1.22
   4 -11   2   44.67    1.00
  -4 -11  -2   43.99    0.82
  -4  11  -2   45.33    0.89
  -4  11  -2   44.36    0.92
  -4  11  -2   43.18    1.32
   4  11   2   46.88    1.35
   4  11   2   45.85    0.80
   5 -11   2    4.68    0.28
  -5 -11  -2    5.52    0.46
  -5 -11  -2    4.67    0.21
  -5  11  -2    4.89    0.17
  -5  11  -2    4.81    0.17
   5  11   2    4.61    0.44
   5  11   2    4.64    0.18
  -5  11  -2    5.30    0.42
  -6 -11  -2   27.90    1.12
   6 -11   2   27.79    0.80
   6  11   2   27.63    0.60
   6  11   2   26.52    1.11
  -6  11  -2   25.88    1.02
   7 -11   2    0.06    0.11
  -7 -11  -2    0.08    0.23
   7  11   2    0.04    0.07
   7  11   2    0.39    0.21
  -7  11  -2   -0.28    0.13
   8 -11   2    6.77    0.43
  -8 -11  -2    6.51    0.67
   8  11   2    6.84    0.64
   8  11   2    7.15    0.31
  -8  11  -2    8.80    0.69
   9 -11   2    1.08    0.22
  -9 -11  -2    0.39    0.42
  -9  11  -2    1.01    0.38
   9  11   2    0.31    0.33
   9 -12  -2    4.11    0.36
  -9 -12   2    2.30    0.59
  -9  12   2    4.08    0.59
   9  12  -2    3.37    0.52
  -8 -12   2    0.02    0.29
   8 -12  -2    0.41    0.17
  -8  12   2   -0.02    0.19
   8  12  -2    0.04    0.22
   7 -12  -2    0.28    0.14
  -7 -12   2    0.04    0.25
  -7  12   2   -0.11    0.17
   7  12  -2    0.13    0.21
   7  12  -2    0.17    0.08
  -6 -12   2   -0.16    0.19
   6 -12  -2    0.03    0.11
  -6  12   2    0.11    0.16
   6  12  -2    0.08    0.08
   6  12  -2    0.09    0.14
   6  12  -2    0.11    0.06
   5 -12  -2    0.73    0.17
  -5 -12   2    0.54    0.24
   5  12  -2    0.69    0.09
  -5  12   2    0.65    0.20
   5  12  -2    0.60    0.08
   5  12  -2    0.80    0.24
   4 -12  -2    0.81    0.15
  -4 -12   2    0.75    0.20
   4  12  -2    0.86    0.07
  -4  12   2    0.63    0.17
   4  12  -2    0.70    0.06
   4  12  -2    0.52    0.19
   3 -12  -2    2.12    0.18
  -3 -12   2    2.03    0.25
   3 -12  -2    2.33    0.12
   3 -12  -2    2.20    0.11
   3  12  -2    2.21    0.07
  -3  12   2    2.22    0.22
   3  12  -2    2.39    0.08
   3  12  -2    2.39    0.31
  -2 -12   2    9.59    0.20
   2 -12  -2    9.88    0.32
   2 -12  -2   10.28    0.35
  -2 -12   2    9.44    0.40
   2  12  -2    9.25    0.19
   2  12  -2   10.00    0.48
  -2  12   2    9.06    0.39
  -2  12   2    8.99    0.35
   1 -12  -2    9.80    0.31
  -1 -12   2    9.74    0.37
  -1 -12   2    9.74    0.22
   1 -12  -2    9.80    0.32
   1 -12  -2    9.44    0.36
  -1  12   2   10.63    0.42
   1  12  -2    9.80    0.23
   1  12  -2    9.73    0.46
  -1  12   2    9.46    0.37
   0 -12  -2    0.13    0.13
   0 -12  -2    0.07    0.07
   0 -12  -2    0.23    0.07
   0 -12  -2    0.15    0.07
   0 -12   2    0.25    0.08
   0 -12  -2    0.12    0.08
   0 -12   2    0.13    0.08
   0 -12   2    0.41    0.16
   0  12   2    0.17    0.15
   0  12  -2    0.18    0.05
   0  12  -2    0.22    0.16
  -1 -12  -2    7.22    0.18
  -1 -12  -2    7.46    0.32
  -1 -12  -2    7.14    0.20
   1 -12   2    6.65    0.32
   1 -12   2    6.95    0.24
   1 -12   2    7.18    0.41
  -1  12  -2    6.58    0.30
  -1  12  -2    7.13    0.35
  -1  12  -2    6.72    0.25
   1  12   2    7.81    0.42
   2 -12   2   11.00    0.34
   2 -12   2   10.30    0.42
  -2 -12  -2   10.53    0.42
  -2 -12  -2   10.54    0.21
  -2  12  -2   10.43    0.41
  -2  12  -2   10.83    0.40
   2  12   2   10.85    0.23
   2  12   2   10.51    0.53
   3 -12   2   14.24    0.48
  -3 -12  -2   14.61    0.57
   3 -12   2   14.45    0.44
  -3 -12  -2   14.29    0.29
  -3  12  -2   14.07    0.55
  -3  12  -2   14.92    0.45
   3  12   2   14.26    0.29
   3  12   2   13.16    0.64
  -4 -12  -2    2.28    0.12
   4 -12   2    2.54    0.20
  -4 -12  -2    2.40    0.32
   4  12   2    2.39    0.36
  -4  12  -2    2.45    0.19
  -4  12  -2    2.92    0.28
   4  12   2    2.53    0.11
  -4  12  -2    2.64    0.18
  -5 -12  -2    2.09    0.36
  -5 -12  -2    1.83    0.15
   5 -12   2    1.84    0.22
  -5  12  -2    1.76    0.27
   5  12   2    1.82    0.11
   5  12   2    1.44    0.32
  -6 -12  -2   10.64    0.68
   6 -12   2   10.38    0.46
   6  12   2   11.02    0.32
  -6  12  -2   10.58    0.62
   6  12   2   10.27    0.70
   7 -12   2    3.44    0.30
  -7 -12  -2    4.02    0.58
  -7  12  -2    2.80    0.41
   7  12   2    3.46    0.51
   7  12   2    3.27    0.18
   8 -12   2    3.16    0.35
  -8 -12  -2    2.71    0.52
   8  12   2    2.61    0.45
  -8  12  -2    2.69    0.44
   8  12   2    2.61    0.21
  -9 -13   2    1.40    0.50
   9 -13  -2    1.76    0.28
  -9  13   2    1.44    0.41
   9  13  -2    1.45    0.40
  -8 -13   2    1.25    0.41
   8 -13  -2    0.90    0.21
  -8  13   2    1.75    0.38
   8  13  -2    0.94    0.37
   8  13  -2    1.18    0.21
  -7 -13   2    2.94    0.53
   7 -13  -2    2.59    0.30
  -7  13   2    1.98    0.36
   7  13  -2    2.49    0.41
   7  13  -2    1.77    0.13
  -6 -13   2    0.75    0.29
   6 -13  -2    1.07    0.20
   6  13  -2    0.92    0.27
   6  13  -2    1.01    0.11
  -6  13   2    0.90    0.22
   6  13  -2    1.17    0.10
  -5 -13   2   14.83    0.74
   5 -13  -2   15.77    0.57
   5  13  -2   16.75    0.77
   5  13  -2   15.65    0.35
  -5  13   2   16.83    0.74
   5  13  -2   16.02    0.36
   4 -13  -2   13.55    0.49
  -4 -13   2   14.48    0.65
   4  13  -2   13.78    0.67
  -4  13   2   14.48    0.62
   4  13  -2   14.78    0.28
   4  13  -2   14.54    0.28
   3 -13  -2    2.62    0.20
   3 -13  -2    2.47    0.13
   3 -13  -2    2.37    0.15
  -3 -13   2    2.70    0.25
  -3  13   2    2.22    0.22
   3  13  -2    2.86    0.30
   2 -13  -2   10.96    0.36
   2 -13  -2   11.89    0.39
  -2 -13   2   11.79    0.46
  -2 -13   2   11.43    0.23
   2  13  -2   11.26    0.53
  -2  13   2   12.50    0.47
  -2  13   2   11.67    0.41
   2  13  -2   11.73    0.22
  -1 -13   2   11.24    0.41
  -1 -13   2   11.34    0.25
   1 -13  -2   10.52    0.34
   1 -13  -2   11.22    0.35
   1  13  -2   11.79    0.51
   1  13  -2   10.87    0.25
  -1  13   2   11.37    0.42
  -1  13   2   11.24    0.45
   0 -13  -2    2.17    0.24
   0 -13  -2    2.29    0.16
   0 -13   2    2.30    0.25
   0 -13   2    2.40    0.18
   0 -13   2    2.47    0.12
   0 -13  -2    2.34    0.13
   0 -13  -2    2.45    0.19
   0  13  -2    2.37    0.12
   0  13   2    2.32    0.24
   0  13  -2    2.77    0.26
   1 -13   2   17.20    0.59
  -1 -13  -2   17.53    0.35
  -1 -13  -2   16.93    0.53
  -1 -13  -2   17.53    0.37
   1 -13   2   17.16    0.42
  -1  13  -2   17.51    0.44
  -1  13  -2   17.33    0.57
  -1  13  -2   17.77    0.53
   1  13   2   17.56    0.66
   2 -13   2    1.35    0.13
   2 -13   2    1.35    0.19
  -2 -13  -2    1.52    0.20
  -2 -13  -2    1.58    0.06
   2  13   2    1.82    0.29
  -2  13  -2    1.81    0.17
  -2  13  -2    1.47    0.20
   3 -13   2    8.37    0.33
   3 -13   2    7.91    0.36
  -3 -13  -2    8.02    0.18
  -3 -13  -2    8.45    0.43
  -3  13  -2    8.08    0.40
   3  13   2    8.37    0.18
  -3  13  -2    7.97    0.49
   3  13   2    8.70    0.61
  -4 -13  -2    1.17    0.09
  -4 -13  -2    1.20    0.25
   4 -13   2    1.34    0.18
   4  13   2    1.17    0.28
   4  13   2    1.23    0.07
  -4  13  -2    1.40    0.17
  -4  13  -2    1.10    0.21
  -4  13  -2    1.36    0.15
  -5 -13  -2   69.10    1.24
  -5 -13  -2   68.66    1.79
   5 -13   2   72.83    1.50
  -5  13  -2   71.79    1.75
   5  13   2   71.78    1.34
   5  13   2   72.92    1.96
  -6 -13  -2    0.27    0.09
   6 -13   2   -0.03    0.11
  -6 -13  -2    0.08    0.18
  -6  13  -2    0.12    0.14
   6  13   2    0.30    0.06
   6  13   2    0.28    0.22
   7 -13   2    1.14    0.19
  -7 -13  -2    1.37    0.40
  -7  13  -2    0.85    0.23
   7  13   2    1.30    0.13
   7  13   2    1.30    0.44
  -8 -13  -2   10.47    0.87
   8 -13   2   10.13    0.52
  -8  13  -2   10.44    0.72
   8  13   2   10.91    0.82
  -8 -14   2    0.00    0.28
   8 -14  -2    0.39    0.16
   8  14  -2    0.63    0.31
  -8  14   2    0.08    0.18
   7 -14  -2    0.35    0.15
  -7 -14   2    0.22    0.31
   7  14  -2    0.39    0.08
  -7  14   2    0.45    0.22
  -6 -14   2    8.55    0.63
   6 -14  -2    7.61    0.42
  -6  14   2    8.12    0.56
   6  14  -2    8.84    0.62
   6  14  -2    7.49    0.22
   6  14  -2    7.97    0.24
  -5 -14   2    0.05    0.17
   5 -14  -2   -0.06    0.11
   5  14  -2    0.10    0.04
  -5  14   2    0.01    0.13
   5  14  -2    0.07    0.03
   5  14  -2    0.22    0.20
  -4 -14   2   39.92    1.17
   4 -14  -2   40.13    0.97
  -4  14   2   39.30    1.13
   4  14  -2   39.89    1.22
   3 -14  -2   14.00    0.47
   3 -14  -2   14.62    0.38
  -3  14   2   13.47    0.64
   3  14  -2   14.41    0.76
  -2 -14   2    1.84    0.19
  -2 -14   2    2.06    0.07
   2 -14  -2    2.13    0.17
   2 -14  -2    2.07    0.16
   2  14  -2    2.14    0.09
  -2  14   2    2.00    0.20
   2  14  -2    2.31    0.29
  -2  14   2    2.51    0.20
   1 -14  -2   43.50    0.99
   1 -14  -2   43.08    0.87
  -1 -14   2   42.65    0.98
  -1 -14   2   43.60    0.74
   1 -14  -2   41.14    0.87
   1  14  -2   42.31    1.11
  -1  14   2   42.73    0.99
   1  14  -2   43.50    0.75
  -1  14   2   43.22    1.05
   0 -14   2    3.16    0.14
   0 -14   2    3.05    0.21
   0 -14  -2    2.87    0.21
   0 -14  -2    3.14    0.16
   0 -14  -2    3.48    0.16
   0  14   2    3.27    0.29
   0  14  -2    3.19    0.15
   0  14  -2    3.36    0.28
  -1 -14  -2    0.45    0.11
   1 -14   2    0.39    0.07
  -1 -14  -2    0.38    0.06
   1 -14   2    0.47    0.13
  -1 -14  -2    0.29    0.05
   1  14   2    0.42    0.16
  -1  14  -2    0.40    0.15
  -1  14  -2    0.36    0.10
  -1  14  -2    0.30    0.08
   2 -14   2    0.03    0.05
  -2 -14  -2    0.03    0.02
  -2 -14  -2    0.06    0.03
   2 -14   2    0.16    0.10
  -2 -14  -2   -0.12    0.06
  -2  14  -2    0.02    0.07
   2  14   2    0.09    0.13
  -2  14  -2    0.05    0.10
   3 -14   2   10.27    0.43
  -3 -14  -2    9.34    0.54
   3 -14   2    9.55    0.41
  -3  14  -2    8.94    0.43
  -3  14  -2   10.03    0.37
   3  14   2   10.02    0.65
   4 -14   2   29.03    0.70
  -4 -14  -2   29.42    0.52
  -4 -14  -2   31.17    0.98
   4 -14   2   29.72    0.77
   4  14   2   29.85    0.52
  -4  14  -2   29.53    0.93
  -4  14  -2   28.70    0.65
   4  14   2   30.95    1.12
   5 -14   2    9.31    0.42
  -5 -14  -2    8.92    0.25
  -5 -14  -2    9.59    0.59
  -5  14  -2    9.84    0.55
   5  14   2    9.28    0.23
   5  14   2    9.98    0.67
  -6 -14  -2   -0.30    0.17
   6  14   2    0.01    0.18
   6  14   2    0.07    0.06
  -6  14  -2    0.11    0.14
  -7 -14  -2    0.23    0.28
   7 -14   2   -0.07    0.08
   7  14   2    0.03    0.06
  -7  14  -2    0.15    0.20
   7  14   2    0.32    0.24
  -8 -14  -2    2.48    0.54
   8 -14   2    4.11    0.33
   8  14   2    4.29    0.64
  -8  14  -2    4.16    0.54
  -8 -15   2    1.18    0.45
   8 -15  -2    1.43    0.25
   8  15  -2    1.70    0.43
  -8  15   2    1.52    0.33
  -7 -15   2    0.09    0.28
   7 -15  -2    0.35    0.12
  -7  15   2    0.34    0.22
   7  15  -2    0.23    0.06
   7  15  -2    0.25    0.23
   6  15  -2    0.37    0.06
   6  15  -2    0.33    0.05
   6  15  -2    0.16    0.22
   5 -15  -2    0.01    0.10
  -5 -15   2    0.10    0.18
  -5  15   2    0.00    0.11
   5  15  -2    0.01    0.17
   4 -15  -2   31.50    0.83
  -4 -15   2   30.42    0.99
  -4  15   2   29.64    0.97
   4  15  -2   31.04    1.07
   3 -15  -2    3.49    0.19
  -3 -15   2    3.20    0.29
  -3  15   2    3.70    0.29
   3  15  -2    3.73    0.36
  -3  15   2    3.83    0.22
   2 -15  -2    0.01    0.08
  -2 -15   2    0.00    0.07
   2 -15  -2   -0.06    0.05
  -2  15   2    0.14    0.10
   2  15  -2    0.08    0.13
  -2  15   2    0.07    0.09
   1 -15  -2   13.91    0.40
   1 -15  -2   13.83    0.49
  -1 -15   2   14.58    0.30
   1 -15  -2   13.08    0.40
  -1 -15   2   14.65    0.50
   1  15  -2   14.30    0.59
   1  15  -2   13.98    0.31
  -1  15   2   14.19    0.54
  -1  15   2   14.11    0.50
   0 -15   2    1.64    0.16
   0 -15  -2    1.66    0.12
   0 -15  -2    1.59    0.19
   0 -15  -2    1.67    0.12
   0 -15   2    1.57    0.10
   0  15  -2    1.47    0.23
   0  15  -2    1.71    0.11
   0  15   2    1.69    0.25
  -1 -15  -2   18.55    0.60
  -1 -15  -2   20.27    0.41
   1 -15   2   19.62    0.47
   1 -15   2   19.04    0.65
  -1 -15  -2   19.60    0.39
   1  15   2   20.50    0.75
  -1  15  -2   20.78    0.61
  -1  15  -2   18.90    0.63
  -1  15  -2   19.41    0.50
   2 -15   2   16.64    0.58
  -2 -15  -2   15.84    0.28
  -2 -15  -2   15.38    0.57
   2 -15   2   16.11    0.46
   2  15   2   17.35    0.73
  -2  15  -2   15.80    0.55
  -2  15  -2   17.05    0.55
   3 -15   2    8.94    0.40
   3 -15   2    8.77    0.35
  -3 -15  -2    9.22    0.46
   3  15   2    8.30    0.55
  -3  15  -2    9.40    0.37
  -3  15  -2    8.96    0.44
   4 -15   2    1.34    0.18
   4 -15   2    0.95    0.15
  -4 -15  -2    1.44    0.26
  -4  15  -2    1.19    0.15
  -4  15  -2    1.21    0.24
   4  15   2    1.01    0.29
  -5 -15  -2    0.67    0.24
   5 -15   2    1.24    0.18
   5  15   2    0.98    0.30
   5  15   2    0.94    0.08
  -5  15  -2    1.44    0.27
   5  15   2    1.12    0.07
   6 -15   2    2.63    0.26
  -6 -15  -2    2.81    0.70
  -6  15  -2    2.83    0.41
   6  15   2    3.77    0.54
   6  15   2    2.93    0.15
  -7 -15  -2    4.97    0.62
   7 -15   2    5.22    0.37
   7  15   2    5.84    0.59
  -7  15  -2    5.29    0.48
   7  15   2    5.27    0.20
  -8 -15  -2   -0.33    0.29
  -8  15  -2   -0.16    0.19
   8  15   2    0.10    0.27
   8  16  -2    1.50    0.40
   7 -16  -2    2.35    0.29
  -7 -16   2    2.34    0.45
   7  16  -2    2.72    0.47
  -7  16   2    2.52    0.40
   6 -16  -2    0.10    0.12
  -6 -16   2    0.12    0.22
  -6  16   2    0.34    0.18
   6  16  -2    0.08    0.19
  -5 -16   2    6.99    0.51
   5 -16  -2    7.45    0.39
  -5  16   2    6.94    0.48
   5  16  -2    7.40    0.55
   4 -16  -2   12.08    0.47
  -4 -16   2   11.39    0.59
   4  16  -2   10.43    0.63
  -4  16   2   11.58    0.57
   3 -16  -2    3.96    0.21
   3 -16  -2    3.97    0.25
  -3 -16   2    3.69    0.31
  -3  16   2    3.94    0.30
  -3  16   2    3.55    0.23
   3  16  -2    4.37    0.39
   2 -16  -2    0.74    0.13
   2 -16  -2    0.95    0.18
  -2 -16   2    0.94    0.18
  -2  16   2    0.81    0.17
   1 -16  -2    4.58    0.25
  -1 -16   2    4.40    0.27
   1 -16  -2    3.90    0.28
  -1 -16   2    4.55    0.14
   1 -16  -2    4.63    0.22
   1  16  -2    3.96    0.33
   1  16  -2    4.15    0.15
  -1  16   2    4.06    0.31
  -1  16   2    4.31    0.27
   0 -16  -2    2.86    0.22
   0 -16   2    3.02    0.14
   0 -16  -2    2.73    0.15
   0 -16  -2    2.84    0.15
   0 -16   2    2.81    0.22
   0  16   2    3.17    0.30
   0  16  -2    2.67    0.27
   1 -16   2    0.98    0.12
  -1 -16  -2    1.03    0.08
  -1 -16  -2    0.94    0.07
  -1 -16  -2    1.21    0.18
  -1  16  -2    1.09    0.16
  -1  16  -2    1.08    0.21
   1  16   2    1.04    0.24
   2 -16   2   21.16    0.55
   2 -16   2   19.51    0.67
   2  16   2   19.51    0.93
  -2  16  -2   20.80    0.64
  -2  16  -2   21.00    0.66
   3 -16   2    0.41    0.10
  -3 -16  -2    0.48    0.16
  -3  16  -2    0.32    0.12
  -3  16  -2    0.57    0.14
   3  16   2    0.21    0.20
  -4 -16  -2   20.87    0.81
   4 -16   2   20.15    0.59
   4 -16   2   20.76    0.63
  -4  16  -2   21.82    0.78
   4  16   2   22.71    0.98
  -4  16  -2   21.50    0.54
  -5 -16  -2   30.10    1.10
   5 -16   2   30.80    0.85
  -5  16  -2   29.67    1.03
   5  16   2   31.50    1.24
   6 -16   2    3.95    0.30
  -6 -16  -2    4.49    0.48
  -6  16  -2    3.93    0.38
   6  16   2    3.62    0.12
   7 -16   2    6.50    0.40
  -7 -16  -2    5.52    0.58
  -7  16  -2    6.15    0.54
   7  16   2    5.46    0.70
  -8 -16  -2   -0.20    0.36
   8 -16   2    0.22    0.12
  -8  16  -2    0.15    0.35
   8  16   2    0.08    0.30
  -8 -17   2    3.17    0.59
   8 -17  -2    3.69    0.35
  -8  17   2    2.91    0.50
   8  17  -2    3.87    0.58
  -7 -17   2    0.11    0.24
   7 -17  -2    0.25    0.15
  -7  17   2    0.25    0.21
   7  17  -2    0.22    0.25
  -6 -17   2    0.32    0.27
   6 -17  -2    0.02    0.10
  -6  17   2    0.08    0.15
   5 -17  -2   23.43    0.75
  -5 -17   2   21.12    0.91
   5  17  -2   23.34    0.99
  -5  17   2   22.56    0.89
  -4 -17   2    4.25    0.37
   4 -17  -2    4.55    0.29
  -4  17   2    3.85    0.34
   4  17  -2    4.60    0.43
  -3 -17   2    0.77    0.19
   3 -17  -2    1.26    0.19
   3 -17  -2    0.84    0.14
  -3  17   2    1.22    0.22
  -3  17   2    1.19    0.18
   3  17  -2    1.21    0.27
   2 -17  -2   15.77    0.53
   2 -17  -2   16.62    0.50
  -2 -17   2   17.71    0.63
  -2  17   2   17.16    0.61
  -2  17   2   15.82    0.58
   2  17  -2   15.70    0.70
   1 -17  -2    4.48    0.22
  -1 -17   2    4.74    0.29
  -1 -17   2    4.74    0.15
  -1  17   2    4.57    0.33
  -1  17   2    4.65    0.30
   1  17  -2    4.51    0.16
   1  17  -2    4.33    0.36
   0 -17   2   -0.08    0.05
   0 -17  -2    0.22    0.08
   0 -17   2   -0.02    0.04
   0 -17  -2    0.07    0.05
   0  17  -2    0.03    0.05
   0  17  -2    0.07    0.13
   0  17   2   -0.02    0.14
  -1 -17  -2    0.84    0.07
   1 -17   2    1.10    0.12
  -1 -17  -2    0.73    0.17
  -1 -17  -2    0.82    0.08
   1  17   2    1.10    0.25
  -1  17  -2    0.94    0.16
  -1  17  -2    0.87    0.20
   2 -17   2    0.89    0.12
   2 -17   2    0.60    0.17
  -2 -17  -2    0.86    0.16
  -2  17  -2    0.78    0.18
  -2  17  -2    0.71    0.15
   2  17   2    0.62    0.22
   3 -17   2    1.03    0.19
   3 -17   2    0.50    0.13
  -3 -17  -2    0.58    0.17
   3  17   2    0.56    0.23
  -3  17  -2    0.72    0.17
  -3  17  -2    0.55    0.14
   4 -17   2    0.07    0.11
   4 -17   2    0.04    0.08
  -4 -17  -2   -0.01    0.13
  -4  17  -2    0.22    0.13
  -4  17  -2    0.08    0.09
   4  17   2    0.16    0.17
  -5 -17  -2    0.87    0.26
   5 -17   2    1.13    0.20
  -5  17  -2    0.88    0.22
   5  17   2    1.21    0.33
  -6 -17  -2    6.05    0.56
   6 -17   2    5.45    0.35
   6  17   2    4.99    0.54
  -6  17  -2    6.65    0.51
   7 -17   2    3.19    0.30
  -7 -17  -2    3.33    0.55
   7  17   2    3.17    0.54
  -7  17  -2    3.44    0.46
  -8 -17  -2    0.49    0.37
   8 -17   2    0.77    0.20
   8  17   2    1.09    0.40
  -8  17  -2    0.98    0.30
  -8 -18   2    1.02    0.42
   8 -18  -2    0.41    0.17
   8  18  -2    0.65    0.35
  -8  18   2    0.88    0.32
  -7 -18   2    0.07    0.25
   7 -18  -2    0.29    0.16
   7  18  -2    0.02    0.25
  -7  18   2    0.14    0.17
  -6 -18   2    0.01    0.23
   6 -18  -2   -0.08    0.10
   6  18  -2    0.07    0.21
  -6  18   2   -0.10    0.13
  -5 -18   2    4.17    0.44
   5 -18  -2    4.59    0.33
  -5  18   2    3.96    0.37
   5  18  -2    5.31    0.50
  -4 -18   2    0.39    0.16
   4 -18  -2    0.64    0.16
   4  18  -2    0.75    0.26
  -4  18   2    0.73    0.18
   3 -18  -2    9.17    0.39
   3 -18  -2    8.72    0.36
  -3 -18   2    8.20    0.48
  -3  18   2    8.21    0.45
  -3  18   2    8.99    0.39
   3  18  -2    9.36    0.58
   2 -18  -2    1.10    0.16
   2 -18  -2    0.99    0.18
  -2 -18   2    1.47    0.23
  -2  18   2    0.98    0.18
   2  18  -2    1.32    0.26
  -2  18   2    1.23    0.22
  -1 -18   2    0.47    0.06
  -1 -18   2    0.71    0.15
   1 -18  -2    0.53    0.11
   1  18  -2    0.57    0.07
  -1  18   2    0.58    0.17
  -1  18   2    0.70    0.15
   0 -18  -2    1.30    0.11
   0 -18   2    1.23    0.10
   0 -18  -2    1.29    0.13
   0 -18  -2    1.26    0.20
   0  18  -2    1.17    0.12
   0  18  -2    1.42    0.27
   0  18   2    1.28    0.25
  -1 -18  -2   12.59    0.29
  -1 -18  -2   12.00    0.50
   1 -18   2   13.23    0.38
  -1 -18  -2   12.61    0.30
  -1  18  -2   12.07    0.49
   1  18   2   13.35    0.75
  -1  18  -2   12.46    0.55
  -2 -18  -2    2.49    0.24
   2 -18   2    2.24    0.17
  -2  18  -2    2.38    0.28
  -2  18  -2    2.57    0.23
   2  18   2    2.50    0.39
   3 -18   2    1.30    0.18
  -3 -18  -2    1.23    0.23
   3 -18   2    1.12    0.20
   3  18   2    1.29    0.32
  -3  18  -2    1.35    0.20
  -3  18  -2    1.22    0.20
   4 -18   2    0.08    0.08
   4 -18   2    0.18    0.12
  -4 -18  -2   -0.02    0.15
  -4  18  -2    0.08    0.11
   4  18   2   -0.13    0.19
   5 -18   2    0.62    0.15
  -5 -18  -2    0.52    0.22
   5  18   2    0.69    0.28
  -5  18  -2    0.59    0.20
  -6 -18  -2   -0.02    0.23
   6 -18   2   -0.15    0.08
  -6  18  -2    0.08    0.14
   6  18   2    0.55    0.26
  -7 -18  -2   -0.33    0.30
   7 -18   2    0.17    0.16
  -7  18  -2   -0.07    0.17
   7  18   2    0.18    0.28
  -8 -18  -2    1.12    0.43
   8 -18   2    2.19    0.28
   8  18   2    1.51    0.61
  -8  18  -2    2.00    0.41
   8 -19  -2    0.03    0.14
  -8 -19   2   -0.43    0.34
   8  19  -2    0.13    0.31
  -8  19   2    0.18    0.26
   7 -19  -2   -0.03    0.12
  -7 -19   2   -0.43    0.24
  -7  19   2   -0.16    0.16
   7  19  -2    0.07    0.25
  -6 -19   2    7.27    0.63
   6 -19  -2    6.11    0.40
   6  19  -2    6.65    0.60
  -6  19   2    7.56    0.55
  -5 -19   2    0.62    0.24
   5 -19  -2    0.78    0.16
   5  19  -2    1.13    0.31
  -5  19   2    0.57    0.20
  -4 -19   2    0.74    0.19
   4 -19  -2    1.04    0.18
  -4  19   2    0.90    0.21
   4  19  -2    0.93    0.27
  -3 -19   2    0.99    0.23
   3 -19  -2    1.18    0.18
   3 -19  -2    1.17    0.17
  -3  19   2    0.88    0.19
   3  19  -2    0.87    0.26
  -3  19   2    1.21    0.19
   2 -19  -2   14.94    0.49
  -2 -19   2   16.18    0.63
   2  19  -2   15.28    0.72
  -2  19   2   16.78    0.63
  -2  19   2   15.61    0.61
   1 -19  -2  103.25    1.82
  -1 -19   2  101.10    1.66
  -1 -19   2  101.29    2.04
  -1  19   2  102.07    2.05
   1  19  -2  103.13    2.23
  -1  19   2  103.17    2.16
   1  19  -2  101.46    1.68
   0 -19  -2   15.32    0.42
   0 -19  -2   14.84    0.57
   0 -19  -2   15.60    0.40
   0 -19   2   15.46    0.57
   0 -19   2   16.20    0.39
   0  19   2   15.65    0.69
   0  19  -2   16.56    0.67
   0  19  -2   15.10    0.41
  -1 -19  -2    5.73    0.18
   1 -19   2    6.49    0.26
  -1 -19  -2    6.43    0.37
  -1 -19  -2    6.13    0.19
  -1  19  -2    7.05    0.43
   1  19   2    6.96    0.51
  -2 -19  -2    1.37    0.23
   2 -19   2    1.61    0.18
  -2  19  -2    1.50    0.24
   2  19   2    1.68    0.33
  -2  19  -2    1.81    0.24
   3 -19   2   12.49    0.54
  -3 -19  -2   12.83    0.61
   3 -19   2   12.59    0.45
  -3  19  -2   13.07    0.57
  -3  19  -2   12.89    0.49
   3  19   2   12.94    0.74
   4 -19   2    1.30    0.19
   4 -19   2    1.59    0.22
  -4 -19  -2    1.29    0.28
  -4  19  -2    1.35    0.18
   4  19   2    1.96    0.41
  -4  19  -2    1.07    0.23
   5 -19   2    1.15    0.23
  -5  19  -2    1.87    0.30
  -6 -19  -2    6.36    0.60
   6 -19   2    7.62    0.42
   6  19   2    7.59    0.67
  -6  19  -2    6.95    0.50
  -7 -19  -2   -0.30    0.26
   7 -19   2   -0.04    0.11
  -7  19  -2   -0.14    0.19
   7  19   2    0.03    0.31
   8 -19   2   -0.05    0.15
  -8 -19  -2   -0.24    0.31
   8  19   2    0.09    0.36
  -8  19  -2    0.14    0.25
   8 -20  -2    1.14    0.24
  -8 -20   2    0.73    0.38
   8  20  -2   -0.14    0.34
  -8  20   2    0.44    0.27
  -7 -20   2    0.58    0.33
   7 -20  -2    0.29    0.14
  -7  20   2    0.40    0.20
   7  20  -2   -0.04    0.27
   6 -20  -2    1.68    0.24
  -6 -20   2    2.85    0.44
  -6  20   2    2.08    0.35
   6  20  -2    1.90    0.40
  -5 -20   2    1.85    0.36
   5 -20  -2    1.32    0.25
   5  20  -2    1.38    0.42
  -5  20   2    1.85    0.29
   4 -20  -2    0.12    0.06
   4 -20  -2    0.02    0.06
  -4 -20   2   -0.27    0.13
   4 -20  -2    0.04    0.10
  -4  20   2    0.17    0.14
   4  20  -2   -0.12    0.18
  -3 -20   2    8.22    0.49
   3 -20  -2    8.51    0.38
   3 -20  -2    8.02    0.38
  -3  20   2    8.64    0.41
   3  20  -2    9.40    0.61
  -3  20   2    8.27    0.47
   2 -20  -2    9.57    0.44
  -2 -20   2    9.18    0.48
   2  20  -2   10.45    0.61
  -2  20   2    9.41    0.49
  -2  20   2    9.05    0.46
  -1 -20   2    2.16    0.27
   1 -20  -2    1.56    0.15
  -1 -20   2    1.97    0.11
   1  20  -2    1.81    0.12
  -1  20   2    1.97    0.31
   1  20  -2    1.97    0.33
   0 -20   2    1.12    0.19
   0 -20  -2    1.21    0.14
   0 -20  -2    1.42    0.22
   0 -20  -2    1.23    0.11
   0 -20   2    1.26    0.10
   0  20   2    1.08    0.25
   0  20  -2    1.44    0.14
   1 -20   2    0.72    0.11
   1 -20   2    0.86    0.17
  -1 -20  -2    0.88    0.08
  -1 -20  -2    0.72    0.07
  -1 -20  -2    0.95    0.20
   1  20   2    0.72    0.25
  -1  20  -2    0.97    0.23
  -2 -20  -2    0.64    0.17
   2 -20   2    0.94    0.14
   2  20   2    0.85    0.26
  -2  20  -2    0.83    0.21
  -2  20  -2    0.84    0.19
   3 -20   2    0.10    0.09
  -3 -20  -2    0.20    0.18
   3  20   2    0.34    0.18
  -3  20  -2    0.15    0.13
  -3  20  -2    0.10    0.11
   4 -20   2    3.87    0.52
  -4 -20  -2    3.83    0.38
   4 -20   2    3.91    0.27
  -4  20  -2    4.33    0.36
  -4  20  -2    4.30    0.26
   4  20   2    4.47    0.56
  -5 -20  -2    0.26    0.20
   5 -20   2    0.24    0.11
   5  20   2    0.46    0.26
  -5  20  -2   -0.23    0.14
  -6 -20  -2    3.66    0.51
   6 -20   2    3.83    0.30
   6  20   2    3.71    0.59
  -6  20  -2    3.75    0.39
   7 -20   2    0.44    0.16
  -7 -20  -2    1.17    0.36
  -7  20  -2    0.72    0.25
   7  20   2    0.64    0.36
   7 -21  -2    1.00    0.22
  -7 -21   2    0.80    0.38
   7  21  -2    1.78    0.44
  -7  21   2    1.40    0.34
   6 -21  -2    5.74    0.38
  -6 -21   2    5.76    0.53
   6  21  -2    6.00    0.59
  -6  21   2    5.91    0.50
  -5 -21   2    2.35    0.40
   5 -21  -2    2.64    0.30
   5  21  -2    2.60    0.45
  -5  21   2    1.71    0.30
   4 -21  -2    0.33    0.15
  -4 -21   2    0.18    0.19
   4 -21  -2    0.35    0.09
   4 -21  -2    0.19    0.09
  -4  21   2    0.35    0.15
   4  21  -2    0.00    0.17
   3 -21  -2    3.74    0.28
  -3 -21   2    3.91    0.35
   3 -21  -2    3.97    0.27
   3  21  -2    3.91    0.49
  -3  21   2    3.23    0.29
  -3  21   2    3.42    0.32
  -2 -21   2    9.85    0.50
   2 -21  -2    9.61    0.38
   2  21  -2    9.30    0.59
  -2  21   2    9.27    0.50
  -2  21   2    9.55    0.49
  -1 -21   2    0.09    0.11
   1 -21  -2   -0.02    0.08
   1  21  -2    0.17    0.06
   1  21  -2    0.27    0.19
  -1  21   2    0.20    0.16
   0 -21   2   26.76    0.58
   0 -21   2   26.47    0.83
   0 -21  -2   26.63    0.60
   0 -21  -2   26.55    0.62
   0 -21  -2   26.59    0.84
   0  21  -2   27.45    0.94
   0  21  -2   26.57    0.61
   0  21   2   27.04    0.98
  -1 -21  -2   13.61    0.58
  -1 -21  -2   13.73    0.31
  -1 -21  -2   13.25    0.32
   1 -21   2   14.08    0.58
   1 -21   2   13.97    0.41
  -1  21  -2   13.19    0.61
   1  21   2   14.14    0.72
  -2 -21  -2   10.11    0.51
   2 -21   2    8.64    0.35
  -2  21  -2    9.53    0.49
   2  21   2   10.12    0.67
  -2  21  -2    8.72    0.46
  -3 -21  -2    3.52    0.34
   3 -21   2    3.32    0.23
  -3  21  -2    2.95    0.27
   3  21   2    2.82    0.44
  -3  21  -2    3.42    0.31
   4 -21   2    0.11    0.11
   4 -21   2   -0.06    0.13
  -4 -21  -2    0.08    0.15
  -4  21  -2    0.06    0.11
  -4  21  -2   -0.19    0.10
   4  21   2    0.20    0.22
   5 -21   2    2.21    0.26
  -5 -21  -2    1.85    0.33
  -5  21  -2    2.09    0.31
   5  21   2    1.91    0.41
   6 -21   2    0.08    0.12
  -6 -21  -2   -0.17    0.23
  -6  21  -2    0.19    0.16
   6  21   2    0.06    0.26
   7 -21   2   -0.24    0.12
  -7  21  -2    0.06    0.18
   7  21   2   -0.04    0.25
  -7 -22   2    0.43    0.32
   7  22  -2    0.66    0.31
  -7  22   2    0.60    0.26
   6 -22  -2    0.63    0.19
  -6 -22   2    1.04    0.30
  -6  22   2    0.23    0.19
   6  22  -2    0.76    0.33
   5 -22  -2    4.59    0.33
  -5 -22   2    4.35    0.44
  -5  22   2    3.87    0.39
   5  22  -2    4.02    0.57
   4 -22  -2    1.24    0.21
   4 -22  -2    1.57    0.16
  -4 -22   2    1.26    0.30
   4 -22  -2    1.29    0.16
  -4  22   2    0.98    0.26
   4  22  -2    1.15    0.37
  -3 -22   2   12.35    0.62
   3 -22  -2   12.52    0.48
   3 -22  -2   11.71    0.48
  -3  22   2   11.70    0.58
   3  22  -2   11.57    0.71
  -3  22   2   12.62    0.53
  -2 -22   2    5.46    0.39
   2 -22  -2    5.19    0.29
  -2  22   2    5.27    0.39
   2  22  -2    5.87    0.50
  -2  22   2    5.23    0.36
   1 -22  -2    0.22    0.11
  -1 -22   2   -0.07    0.10
  -1 -22   2    0.04    0.07
   1 -22  -2    0.13    0.09
  -1  22   2   -0.07    0.18
   1  22  -2    0.02    0.22
   1  22  -2   -0.06    0.05
   0 -22   2   21.85    0.75
   0 -22  -2   21.52    0.52
   0 -22   2   21.62    0.50
   0 -22  -2   22.20    0.77
   0 -22  -2   21.17    0.53
   0  22  -2   21.31    0.85
   0  22   2   21.13    0.88
  -1 -22  -2    0.96    0.09
   1 -22   2    0.69    0.18
  -1 -22  -2    0.75    0.18
  -1 -22  -2    1.09    0.08
   1 -22   2    1.03    0.13
  -1  22  -2    0.66    0.27
   1  22   2    0.93    0.27
   2 -22   2    7.12    0.32
  -2 -22  -2    7.92    0.47
  -2  22  -2    8.17    0.47
   2  22   2    7.81    0.59
  -2  22  -2    8.30    0.46
   3 -22   2    0.36    0.11
  -3 -22  -2    0.51    0.18
  -3  22  -2    0.64    0.18
   3  22   2    0.40    0.24
  -3  22  -2    0.64    0.16
   4 -22   2    0.16    0.10
  -4  22  -2    0.09    0.12
   4  22   2   -0.22    0.19
  -4  22  -2    0.10    0.12
  -5 -22  -2    0.33    0.21
   5 -22   2    0.18    0.12
   5  22   2    0.19    0.21
  -5  22  -2    0.17    0.15
   6 -22   2    1.66    0.23
  -6 -22  -2    1.62    0.36
   6  22   2    0.36    0.28
  -6  22  -2    1.21    0.26
   7 -22   2    0.04    0.14
  -7 -22  -2   -0.27    0.25
  -7  22  -2   -0.02    0.19
   7  22   2   -0.31    0.31
   7 -23  -2    0.27    0.16
  -7 -23   2   -0.24    0.26
  -7  23   2    0.01    0.19
   7  23  -2   -0.37    0.32
   6 -23  -2    6.38    0.43
  -6 -23   2    5.99    0.60
   6  23  -2    6.29    0.63
  -6  23   2    6.43    0.52
  -5 -23   2    2.70    0.42
   5 -23  -2    2.33    0.29
  -5  23   2    2.40    0.35
   5  23  -2    2.68    0.47
   4 -23  -2    9.48    0.45
   4 -23  -2    9.24    0.36
  -4 -23   2    8.75    0.59
   4  23  -2    9.46    0.69
  -4  23   2    8.98    0.55
   3 -23  -2    5.26    0.32
  -3 -23   2    4.96    0.40
  -3  23   2    5.25    0.37
   3  23  -2    4.74    0.48
  -3  23   2    5.33    0.39
   2 -23  -2    2.28    0.20
  -2 -23   2    2.02    0.29
   2  23  -2    1.89    0.38
  -2  23   2    1.63    0.25
  -2  23   2    2.06    0.32
   1 -23  -2    0.78    0.13
  -1 -23   2    0.61    0.08
   1 -23  -2    0.87    0.19
  -1 -23   2    0.66    0.17
   1  23  -2    0.74    0.09
  -1  23   2    0.27    0.22
   1  23  -2    0.48    0.24
   0 -23   2    0.07    0.09
   0 -23   2    0.12    0.06
   0 -23  -2    0.17    0.07
   0 -23  -2   -0.02    0.08
   0 -23  -2   -0.03    0.08
   0  23  -2   -0.13    0.15
   0  23   2   -0.08    0.20
  -1 -23  -2   31.70    0.99
   1 -23   2   31.69    0.97
   1 -23   2   32.71    0.74
  -1 -23  -2   32.81    0.72
  -1 -23  -2   30.86    0.61
   1  23   2   32.57    1.20
  -1  23  -2   34.73    1.07
   2 -23   2    0.60    0.12
  -2 -23  -2    0.76    0.21
  -2  23  -2    0.67    0.18
   2  23   2    0.64    0.24
  -2  23  -2    0.97    0.24
   3 -23   2    0.59    0.13
  -3 -23  -2    0.53    0.20
  -3  23  -2    0.31    0.14
  -3  23  -2    0.11    0.15
   3  23   2    0.46    0.26
   4 -23   2    2.55    0.23
  -4 -23  -2    2.74    0.40
  -4  23  -2    2.70    0.35
  -4  23  -2    2.64    0.25
   4  23   2    3.16    0.50
  -5 -23  -2    8.73    0.62
   5 -23   2    7.65    0.41
   5  23   2    9.53    0.76
  -5  23  -2    8.52    0.54
   6 -23   2    6.26    0.41
  -6 -23  -2    7.25    0.65
   6  23   2    7.79    0.77
  -6  23  -2    6.23    0.51
   7 -23   2    0.28    0.17
  -7 -23  -2    0.42    0.35
   7  23   2    0.14    0.33
  -7  23  -2    0.54    0.21
  -7 -24   2    0.58    0.33
   7 -24  -2    0.42    0.18
   7  24  -2    1.15    0.45
  -7  24   2    0.55    0.24
  -6 -24   2    1.58    0.39
   6 -24  -2    1.57    0.27
  -6  24   2    1.59    0.31
   6  24  -2    0.81    0.35
  -5 -24   2    0.83    0.22
   5 -24  -2    0.34    0.13
   5  24  -2    0.12    0.22
  -5  24   2    0.31    0.16
  -4 -24   2    0.53    0.20
   4 -24  -2    0.55    0.15
   4  24  -2    0.59    0.28
  -4  24   2    0.66    0.19
  -3 -24   2    4.06    0.40
   3 -24  -2    4.01    0.29
  -3  24   2    4.34    0.42
   3  24  -2    4.36    0.56
  -3  24   2    3.85    0.35
   2 -24  -2    1.71    0.20
  -2 -24   2    1.53    0.26
   2  24  -2    1.54    0.35
  -2  24   2    1.49    0.26
  -2  24   2    0.93    0.26
  -1 -24   2   41.33    0.75
   1 -24  -2   42.75    1.20
   1 -24  -2   41.53    0.91
  -1 -24   2   41.74    1.18
   1  24  -2   40.74    1.33
  -1  24   2   40.95    1.28
   0 -24  -2    2.51    0.16
   0 -24   2    2.13    0.30
   0 -24  -2    2.54    0.27
   0 -24   2    2.39    0.15
   0  24   2    2.42    0.40
   0  24  -2    3.04    0.41
   1 -24   2    6.06    0.27
   1 -24   2    6.20    0.40
  -1 -24  -2    5.58    0.19
  -1 -24  -2    5.99    0.25
  -1 -24  -2    6.32    0.42
   1  24   2    5.61    0.50
  -1  24  -2    6.41    0.47
   2 -24   2   12.15    0.44
  -2 -24  -2   13.48    0.63
   2  24   2   11.68    0.75
  -2  24  -2   11.48    0.57
  -2  24  -2   12.25    0.68
   3 -24   2    2.49    0.22
  -3  24  -2    2.45    0.33
  -3  24  -2    3.09    0.31
  -4 -24  -2    1.01    0.25
  -4  24  -2    1.44    0.22
  -4  24  -2    1.19    0.23
   4  24   2    1.23    0.37
   5 -24   2    0.17    0.13
  -5 -24  -2    0.09    0.18
  -5  24  -2   -0.20    0.12
   5  24   2    0.14    0.23
  -6 -24  -2    0.27    0.28
   6 -24   2    0.61    0.18
   6  24   2    1.12    0.38
  -6  24  -2    0.77    0.24
   6 -25  -2    1.72    0.28
  -6 -25   2    1.30    0.46
  -6  25   2    2.84    0.52
   6  25  -2    1.13    0.40
  -5 -25   2    0.17    0.20
   5 -25  -2   -0.02    0.10
  -5  25   2    0.21    0.16
   5  25  -2   -0.19    0.21
  -4 -25   2    0.09    0.19
   4  25  -2   -0.06    0.19
  -4  25   2    0.17    0.13
   3 -25  -2    0.21    0.10
  -3 -25   2    0.43    0.20
   3  25  -2   -0.02    0.21
  -3  25   2    0.17    0.20
  -3  25   2    0.33    0.14
   2 -25  -2    0.37    0.11
  -2 -25   2    0.23    0.16
  -2  25   2    0.08    0.20
  -2  25   2    0.16    0.13
   2  25  -2   -0.04    0.19
  -1 -25   2    4.96    0.20
  -1 -25   2    5.36    0.17
  -1 -25   2    6.11    0.43
   1 -25  -2    5.00    0.38
   1 -25  -2    4.90    0.26
  -1  25   2    4.73    0.45
   1  25  -2    5.47    0.51
   0 -25  -2    6.34    0.43
   0 -25   2    7.01    0.25
   0 -25  -2    6.64    0.25
   0 -25   2    6.41    0.44
   0  25   2    6.91    0.55
   0  25  -2    7.47    0.55
  -1 -25  -2   10.14    0.54
   1 -25   2   10.42    0.54
  -1 -25  -2    9.31    0.25
  -1  25  -2   10.27    0.59
   1  25   2   10.06    0.67
   2 -25   2    9.28    0.38
  -2 -25  -2   10.45    0.56
  -2  25  -2   10.29    0.56
   2  25   2   10.36    0.72
  -3 -25  -2    0.70    0.21
   3 -25   2    0.57    0.14
   3  25   2    0.44    0.28
  -3  25  -2    0.27    0.19
  -3  25  -2    0.83    0.20
  -4 -25  -2    4.89    0.47
   4 -25   2    5.02    0.33
  -4  25  -2    5.56    0.44
   4  25   2    4.54    0.62
  -4  25  -2    4.86    0.34
  -5 -25  -2    7.52    0.59
   5 -25   2    6.91    0.39
   5  25   2    5.97    0.64
  -5  25  -2    6.62    0.51
   6 -25   2   -0.22    0.12
  -6  25  -2    0.54    0.22
  -6 -26   2    0.52    0.30
   6 -26  -2    0.17    0.19
   6  26  -2   -0.09    0.32
  -6  26   2    0.30    0.22
  -5 -26   2   -0.16    0.21
   5 -26  -2   -0.10    0.12
   5  26  -2   -0.15    0.23
  -5  26   2   -0.07    0.12
   4 -26  -2    1.32    0.21
  -4 -26   2    0.95    0.24
   4  26  -2    1.09    0.36
  -4  26   2    1.00    0.23
  -3 -26   2    0.56    0.20
   3 -26  -2    0.40    0.14
   3  26  -2    1.02    0.30
  -3  26   2    0.24    0.15
  -3  26   2    0.36    0.21
  -2 -26   2   14.78    0.82
   2 -26  -2   16.26    0.53
  -2  26   2   15.96    0.75
   2  26  -2   16.46    0.89
  -1 -26   2    3.12    0.38
  -1 -26   2    2.78    0.15
   1 -26  -2    2.55    0.33
  -1 -26   2    2.86    0.13
   1  26  -2    2.92    0.42
  -1  26   2    2.68    0.40
   0 -26   2    0.05    0.12
   0 -26  -2    0.20    0.13
   0 -26  -2    0.17    0.07
   0 -26   2    0.22    0.07
   0  26  -2    0.02    0.19
   0  26   2   -0.04    0.17
  -1 -26  -2    0.33    0.06
   1 -26   2    0.29    0.08
  -1 -26  -2    0.31    0.15
  -1 -26  -2    0.25    0.05
   1  26   2    0.12    0.22
  -1  26  -2    0.20    0.21
  -2 -26  -2    0.77    0.23
   2 -26   2    0.31    0.11
  -2  26  -2    0.10    0.19
   2  26   2    0.15    0.26
   3 -26   2    0.69    0.14
  -3 -26  -2    0.90    0.24
  -3  26  -2    0.68    0.18
  -3  26  -2    0.53    0.20
   3  26   2    0.76    0.33
   4 -26   2    2.52    0.28
  -4 -26  -2    3.05    0.42
  -4  26  -2    2.81    0.31
   4  26   2    3.12    0.52
  -4  26  -2    2.43    0.32
  -5 -26  -2    0.22    0.23
   5 -26   2    0.00    0.09
  -5  26  -2    0.04    0.16
   5  26   2    0.38    0.37
  -6 -26  -2    1.26    0.33
   6 -26   2    0.93    0.19
  -6  26  -2    0.58    0.23
   6  26   2    0.47    0.38
   6 -27  -2   -0.18    0.15
  -6 -27   2   -0.05    0.22
  -6  27   2    0.15    0.20
   6  27  -2   -0.26    0.26
  -5 -27   2    0.21    0.20
   5 -27  -2   -0.02    0.12
   5  27  -2   -0.25    0.23
  -5  27   2   -0.01    0.16
  -4 -27   2    4.57    0.47
   4 -27  -2    4.04    0.31
  -4  27   2    4.37    0.42
   4  27  -2    4.28    0.62
   3 -27  -2    2.85    0.25
  -3 -27   2    3.31    0.42
  -3  27   2    3.12    0.38
   3  27  -2    3.61    0.54
  -3  27   2    3.07    0.39
   2 -27  -2    0.79    0.22
  -2 -27   2    0.47    0.17
   2 -27  -2    0.30    0.10
   2  27  -2    0.63    0.31
  -2  27   2    0.35    0.24
   1 -27  -2   11.05    0.39
  -1 -27   2   11.27    0.61
   1 -27  -2   11.72    0.60
   1  27  -2   11.81    0.72
  -1  27   2   10.63    0.66
   0 -27  -2    0.42    0.18
   0 -27  -2    0.27    0.08
   0 -27   2    0.34    0.07
   0  27   2    0.71    0.28
   0  27  -2    0.55    0.26
   1 -27   2    1.81    0.28
  -1 -27  -2    1.77    0.09
  -1 -27  -2    2.11    0.31
   1 -27   2    1.90    0.16
  -1  27  -2    1.46    0.34
   1  27   2    1.79    0.37
   2 -27   2   27.32    0.72
   2 -27   2   26.94    0.97
  -2 -27  -2   26.95    1.00
   2  27   2   26.42    1.21
  -2  27  -2   27.45    0.99
  -3 -27  -2    0.36    0.21
   3 -27   2    0.49    0.12
  -3  27  -2    0.33    0.20
   3  27   2    0.38    0.30
  -3  27  -2    0.17    0.14
  -4 -27  -2   -0.05    0.13
   4 -27   2   -0.03    0.09
  -4  27  -2   -0.10    0.14
   4  27   2    0.10    0.24
  -4  27  -2    0.02    0.21
  -5 -27  -2    0.04    0.19
   5 -27   2    0.01    0.13
   5  27   2    0.30    0.28
  -5  27  -2    0.09    0.19
  -6 -27  -2    0.19    0.23
   6 -27   2    0.25    0.15
   6  27   2   -0.27    0.38
  -6  27  -2   -0.15    0.17
  -6 -28   2    1.71    0.42
  -6  28   2    0.81    0.29
   5 -28  -2    0.84    0.21
   4 -28  -2    0.61    0.17
  -4 -28   2    0.48    0.24
   4  28  -2    0.41    0.30
  -4  28   2    0.36    0.16
   3 -28  -2    0.07    0.11
  -3 -28   2    0.25    0.18
  -3  28   2    0.11    0.15
  -3  28   2   -0.39    0.23
   3  28  -2    0.57    0.27
   2 -28  -2    0.75    0.22
  -2 -28   2    0.79    0.21
   2 -28  -2    0.59    0.14
   2  28  -2    0.37    0.25
  -2  28   2    0.28    0.24
   1 -28  -2    0.32    0.14
   1 -28  -2    0.19    0.09
  -1 -28   2    0.14    0.13
  -1  28   2    0.20    0.21
   0 -28  -2    1.28    0.25
   0 -28  -2    1.38    0.13
   0 -28   2    1.27    0.12
   0 -28   2    1.30    0.26
   0  28   2    1.71    0.38
   0  28  -2    1.54    0.32
  -1 -28  -2    4.02    0.37
   1 -28   2    3.75    0.35
  -1 -28  -2    3.75    0.12
   1 -28   2    3.55    0.22
   1  28   2    4.06    0.65
  -1  28  -2    4.33    0.51
   2 -28   2   12.06    0.63
   2 -28   2   12.29    0.45
  -2 -28  -2   13.48    0.68
  -2  28  -2   13.01    0.68
   2  28   2   12.15    0.85
   3 -28   2    0.79    0.16
  -3 -28  -2    0.73    0.25
   3  28   2    0.47    0.31
  -3  28  -2    0.73    0.22
  -3  28  -2    0.54    0.23
  -4 -28  -2    3.88    0.50
   4 -28   2    3.54    0.29
   4  28   2    2.91    0.55
  -4  28  -2    3.47    0.43
  -5 -28  -2    2.49    0.49
   5 -28   2    2.58    0.30
   5  28   2    2.37    0.50
  -5  28  -2    2.03    0.40
   5 -29  -2    1.49    0.25
  -5 -29   2    1.89    0.38
  -5  29   2    1.15    0.28
   5  29  -2    0.95    0.39
   4 -29  -2    2.21    0.27
  -4 -29   2    2.23    0.39
  -4  29   2    1.69    0.30
   4  29  -2    1.51    0.44
  -3 -29   2    3.60    0.37
   3 -29  -2    3.08    0.34
  -3  29   2    2.37    0.37
   3  29  -2    3.70    0.57
  -3  29   2    2.64    0.38
   2 -29  -2    8.46    0.38
  -2 -29   2    8.98    0.57
   2 -29  -2    9.08    0.57
   2  29  -2    9.71    0.71
  -2  29   2    9.18    0.63
   1 -29  -2   -0.06    0.12
  -1 -29   2    0.21    0.16
   1 -29  -2    0.15    0.09
  -1  29   2    0.73    0.27
   1  29  -2    0.16    0.21
   0 -29   2    0.79    0.11
   0 -29  -2    1.33    0.12
   0 -29  -2    0.97    0.24
   0 -29   2    0.87    0.22
   0  29  -2    0.79    0.30
   0  29   2    1.24    0.35
  -1 -29  -2    8.21    0.55
   1 -29   2    7.11    0.49
   1 -29   2    8.00    0.33
   1  29   2    8.98    0.70
  -1  29  -2    7.45    0.55
  -2 -29  -2    1.79    0.31
   2 -29   2    1.49    0.18
   2 -29   2    1.78    0.29
  -2  29  -2    0.62    0.28
   2  29   2    0.93    0.35
  -3 -29  -2    0.10    0.17
   3 -29   2    0.06    0.09
   3  29   2    0.23    0.28
  -3  29  -2   -0.10    0.21
  -4 -29  -2    0.30    0.20
   4 -29   2    0.31    0.13
   4  29   2   -0.19    0.24
  -4  29  -2    0.00    0.16
   5 -29   2   -0.02    0.14
  -5 -29  -2    0.50    0.26
  -5  29  -2    0.35    0.23
   5  29   2    0.05    0.30
   5 -30  -2    0.29    0.18
  -5 -30   2    0.53    0.29
  -5  30   2    0.61    0.25
   5  30  -2    0.22    0.29
   4 -30  -2    1.66    0.23
  -4 -30   2    1.12    0.32
   4  30  -2    1.63    0.47
  -3 -30   2    0.42    0.20
   3 -30  -2    0.29    0.13
   3  30  -2   -0.01    0.24
  -3  30   2    0.44    0.29
  -2 -30   2    0.86    0.24
   2 -30  -2    0.74    0.15
   2 -30  -2    0.66    0.22
   2  30  -2    0.67    0.30
  -2  30   2    0.71    0.29
   1 -30  -2    0.33    0.17
   1 -30  -2    0.37    0.10
  -1 -30   2    0.63    0.20
  -1  30   2    0.45    0.25
   1  30  -2    0.23    0.26
   0 -30   2    0.21    0.08
   0 -30   2    0.21    0.15
   0 -30  -2    0.15    0.08
   0 -30  -2    0.42    0.18
   0  30  -2    0.35    0.24
   1 -30   2   12.58    0.43
   1 -30   2   13.21    0.68
  -1 -30  -2   12.83    0.69
  -1  30  -2   13.10    0.75
   1  30   2   13.14    0.87
   2 -30   2    0.48    0.12
   2 -30   2    0.71    0.22
  -2 -30  -2    1.03    0.28
  -2  30  -2    0.32    0.25
   2  30   2    0.26    0.30
  -3 -30  -2    1.83    0.37
   3 -30   2    1.83    0.22
   3 -30   2    0.92    0.25
   3  30   2    1.38    0.47
  -3  30  -2    1.49    0.31
   4 -30   2    0.69    0.16
  -4  30  -2    1.07    0.27
  -5 -30  -2    5.09    0.55
   5 -30   2    4.02    0.57
   5  30   2    3.24    0.61
  -5  30  -2    5.32    0.48
   4 -31  -2    2.54    0.30
  -4 -31   2    2.33    0.40
   4  31  -2    2.92    0.52
  -4  31   2    1.85    0.35
  -3 -31   2    1.32    0.32
   3 -31  -2    1.19    0.19
   3 -31  -2    1.79    0.32
   3  31  -2    1.92    0.48
  -3  31   2    1.39    0.37
   2 -31  -2    1.60    0.30
   2 -31  -2    1.85    0.22
  -2 -31   2    2.16    0.38
  -2  31   2    1.16    0.37
   2  31  -2    1.79    0.42
   1 -31  -2    6.78    0.50
  -1 -31   2    6.16    0.49
   1 -31  -2    6.85    0.31
   1  31  -2    7.36    0.64
  -1  31   2    6.43    0.59
   0 -31   2    0.09    0.07
   0 -31  -2    0.26    0.15
   0 -31   2    0.09    0.14
   0  31  -2    0.18    0.26
   0  31   2    0.08    0.25
  -1 -31  -2    0.37    0.18
   1 -31   2    0.12    0.15
   1 -31   2    0.26    0.09
   1  31   2    0.06    0.25
  -1  31  -2    0.08    0.25
   2 -31   2   -0.17    0.08
   2 -31   2    0.09    0.16
  -2 -31  -2    0.41    0.18
   2  31   2   -0.16    0.23
  -2  31  -2    0.01    0.24
   3 -31   2    0.15    0.18
  -3 -31  -2    0.42    0.21
   3 -31   2    0.29    0.13
   3  31   2    0.49    0.31
  -3  31  -2    0.24    0.26
  -4 -31  -2    0.89    0.27
   4 -31   2    0.49    0.18
   4  31   2    0.59    0.41
  -4  31  -2    0.18    0.19
  -4 -32   2    0.48    0.24
   4 -32  -2    0.02    0.14
  -4  32   2    0.08    0.20
   4  32  -2    0.63    0.41
   3 -32  -2    1.36    0.31
  -3 -32   2    1.75    0.42
   3 -32  -2    1.42    0.22
   2 -32  -2    1.10    0.26
  -2 -32   2    1.13    0.28
   2 -32  -2    0.83    0.15
  -2  32   2    1.32    0.37
   2  32  -2    0.30    0.31
  -1 -32   2   -0.02    0.14
   1 -32  -2    0.02    0.09
   1 -32  -2    0.16    0.17
   1  32  -2    0.20    0.27
   0 -32   2    1.68    0.32
   0 -32  -2    1.79    0.32
   0  32   2    1.48    0.38
   0  32  -2    1.81    0.40
  -1 -32  -2    0.39    0.22
   1 -32   2    0.37    0.11
  -1  32  -2    0.26    0.31
   1  32   2    0.50    0.34
  -2 -32  -2    0.06    0.18
   2 -32   2    0.01    0.08
   2 -32   2    0.13    0.17
   2  32   2   -0.09    0.27
  -2  32  -2    0.06    0.28
  -3 -32  -2    0.34    0.23
   3 -32   2    0.18    0.12
  -3  32  -2   -0.25    0.28
  -4 -32  -2    0.33    0.28
   4 -32   2    0.41    0.16
   4  32   2    0.92    0.42
  -3 -33   2    4.35    0.46
   3 -33  -2    4.84    0.32
   3  33  -2    4.35    0.63
   2 -33  -2    1.20    0.28
   2 -33  -2    1.76    0.21
  -2 -33   2    2.54    0.59
   2  33  -2    1.84    0.50
  -2  33   2    1.68    0.44
   1 -33  -2   -0.19    0.18
  -1 -33   2    0.18    0.19
   1  33  -2   -0.15    0.26
  -1  33   2   -0.07    0.28
   0 -33   2    0.47    0.23
   0 -33  -2    0.09    0.16
   0  33  -2    0.32    0.30
   0  33   2    0.44    0.31
   1 -33   2    3.64    0.39
   1 -33   2    3.77    0.39
  -1  33  -2    3.63    0.54
   1  33   2    2.29    0.50
   2 -33   2    5.74    0.33
  -2 -33  -2    6.91    0.58
   2  33   2    5.90    0.74
   3 -33   2    7.73    0.41
   3  33   2    6.85    0.72
   2 -34  -2    1.01    0.20
  -2 -34   2    0.66    0.26
   2 -34  -2    0.78    0.27
   2  34  -2    0.68    0.43
   1 -34  -2    0.07    0.18
  -1 -34   2    0.46    0.24
   1  34  -2    0.09    0.34
  -1  34   2    0.45    0.34
   0 -34   2    1.93    0.35
   0 -34  -2    1.79    0.33
   0  34   2    1.75    0.45
   0  34  -2    1.57    0.43
   1 -34   2    0.71    0.21
  -1 -34  -2    0.01    0.18
   1  34   2    0.05    0.32
  -1  34  -2   -0.17    0.27
   2 -34   2    1.32    0.31
  -2 -34  -2    1.40    0.35
   2 -34   2    0.68    0.18
  -2  34  -2    1.34    0.38
   2  34   2    0.00    0.39
   1 -35  -2    2.66    0.40
  -1 -35   2    1.95    0.34
  -1  35   2    1.76    0.47
   1  35  -2    2.00    0.50
   0 -35  -2    0.35    0.19
   0 -35   2    0.04    0.17
   0  35  -2   -0.21    0.27
   0  35   2    0.11    0.36
  -1 -35  -2    0.21    0.19
   1 -35   2    0.28    0.24
  -1  35  -2   -0.39    0.32
   1  35   2    1.13    0.37
   9   0  -3    0.07    0.14
  -9   0   3    0.00    0.22
   8   0  -3   -0.12    0.11
  -8   0   3    0.05    0.21
   8   0  -3   -0.08    0.14
   7   0  -3   -0.14    0.08
   7   0  -3   -0.07    0.12
  -7   0   3    0.13    0.20
  -6   0   3    0.14    0.16
   6   0  -3    0.01    0.09
  -6   0   3    0.09    0.14
   6   0  -3    0.06    0.11
   5   0  -3   -0.05    0.07
   5   0  -3   -0.05    0.08
  -5   0   3   -0.05    0.10
  -5   0   3   -0.09    0.16
  -4   0   3   -0.04    0.12
   4   0  -3   -0.05    0.06
   4   0  -3    0.13    0.10
  -4   0   3    0.05    0.09
   3   0  -3   -0.01    0.08
   3   0  -3    0.19    0.08
   3   0  -3   -0.15    0.12
  -3   0   3   -0.11    0.10
   3   0  -3    0.13    0.12
  -3   0   3    0.06    0.12
  -2   0   3   -0.02    0.04
   2   0  -3    0.00    0.06
  -2   0   3    0.06    0.07
   2   0  -3   -0.01    0.06
   2   0  -3    0.00    0.04
  -2   0   3   -0.07    0.07
   1   0  -3    0.01    0.03
   1   0  -3    0.05    0.06
  -1   0   3    0.08    0.07
  -1   0   3    0.05    0.05
   1   0  -3    0.03    0.05
  -1   0   3    0.02    0.04
   0   0   3   -0.01    0.02
   0   0  -3    0.05    0.03
   0   0  -3   -0.02    0.08
   0   0   3    0.01    0.08
  -1   0  -3    0.04    0.05
  -1   0  -3    0.07    0.03
   1   0   3    0.05    0.03
   1   0   3    0.08    0.04
  -1   0  -3    0.14    0.09
  -2   0  -3    0.03    0.10
   2   0   3    0.00    0.04
  -2   0  -3    0.19    0.05
  -2   0  -3    0.06    0.12
  -2   0  -3    0.19    0.09
   2   0   3    0.03    0.07
   3   0   3    0.17    0.06
   3   0   3   -0.04    0.10
  -3   0  -3    0.04    0.12
  -3   0  -3   -0.07    0.12
  -3   0  -3   -0.07    0.04
  -3   0  -3    0.12    0.12
   4   0   3    0.07    0.06
  -4   0  -3   -0.06    0.08
  -4   0  -3   -0.03    0.10
  -5   0  -3    0.04    0.16
   5   0   3   -0.09    0.05
  -5   0  -3   -0.02    0.13
  -6   0  -3    0.03    0.20
   6   0   3    0.23    0.08
  -6   0  -3    0.14    0.19
  -7   0  -3    0.13    0.21
  -7   0  -3    0.11    0.21
   7   0   3    0.10    0.10
   8   0   3    0.12    0.11
  -8   0  -3   -0.07    0.22
  -8   0  -3    0.11    0.25
  -9   0  -3    0.39    0.43
   9   0   3   -0.14    0.12
  -9  -1   3    0.25    0.30
   9  -1  -3    0.47    0.14
  -9   1   3    0.05    0.28
   9   1  -3    0.19    0.14
  -8  -1   3    3.22    0.51
   8  -1  -3    2.94    0.28
  -8   1   3    2.60    0.46
   8   1  -3    2.80    0.26
   8   1  -3    2.99    0.34
   7  -1  -3    0.30    0.14
  -7  -1   3    0.18    0.18
   7  -1  -3    0.42    0.13
   7   1  -3    0.34    0.15
  -7   1   3    0.33    0.21
   7   1  -3    0.31    0.13
  -7   1   3    0.56    0.17
  -6  -1   3   29.77    1.12
   6  -1  -3   28.87    0.77
   6  -1  -3   29.83    0.79
   6   1  -3   28.66    0.76
   6   1  -3   27.88    0.82
  -6   1   3   29.04    0.81
  -6   1   3   28.88    1.09
   5  -1  -3    0.11    0.10
   5  -1  -3    0.28    0.10
  -5  -1   3    0.16    0.12
  -5  -1   3    0.37    0.21
  -5   1   3    0.20    0.10
  -5   1   3    0.03    0.14
   5   1  -3    0.01    0.08
   5   1  -3    0.15    0.12
   4  -1  -3   29.50    0.79
   4  -1  -3   29.17    0.71
  -4  -1   3   32.54    0.96
   4   1  -3   30.36    0.71
  -4   1   3   30.66    0.95
   4   1  -3   32.95    0.78
  -4   1   3   29.47    0.75
  -3  -1   3   80.71    1.67
   3  -1  -3   82.07    1.48
   3  -1  -3   83.80    1.48
   3  -1  -3   81.33    1.64
  -3  -1   3   78.64    1.57
   3  -1  -3   82.25    1.50
   3   1  -3   80.99    1.46
   3   1  -3   81.51    1.46
   3   1  -3   82.91    1.55
  -3   1   3   82.29    1.69
  -3   1   3   81.42    1.54
   3   1  -3   80.84    1.61
  -2  -1   3    4.63    0.29
  -2  -1   3    4.70    0.26
   2  -1  -3    4.85    0.25
   2  -1  -3    4.58    0.19
   2  -1  -3    5.07    0.24
  -2  -1   3    4.72    0.19
   2   1  -3    4.58    0.23
  -2   1   3    4.67    0.20
   2   1  -3    4.53    0.24
   2   1  -3    4.98    0.19
  -2   1   3    4.48    0.24
   1  -1  -3    0.68    0.08
  -1  -1   3    0.83    0.09
  -1  -1   3    0.66    0.08
   1  -1  -3    0.83    0.13
  -1  -1   3    0.61    0.12
   1   1  -3    0.68    0.07
   1   1  -3    0.64    0.12
   1   1  -3    0.64    0.06
  -1   1   3    0.81    0.08
  -1   1   3    0.68    0.12
  -1   1   3    0.77    0.08
   0  -1   3   86.93    1.67
   0  -1  -3   94.24    1.70
   0  -1  -3   90.36    1.39
   0  -1  -3   90.21    1.47
   0  -1  -3   90.49    1.40
   0  -1   3   90.29    1.47
   0   1  -3   91.77    1.69
   0   1   3   88.42    1.47
   0   1   3   91.24    1.68
   0   1  -3   86.27    1.46
  -1  -1  -3  261.96    4.35
  -1  -1  -3  266.31    4.34
   1  -1   3  259.36    4.32
  -1   1  -3  261.17    4.34
   2  -1   3    0.01    0.08
   2  -1   3    0.08    0.04
  -2  -1  -3    0.07    0.10
  -2  -1  -3    0.03    0.04
  -2  -1  -3   -0.02    0.08
   2   1   3   -0.06    0.06
  -2   1  -3   -0.07    0.09
   2   1   3    0.01    0.03
  -2   1  -3    0.13    0.12
  -2   1  -3    0.11    0.08
  -3  -1  -3  157.05    2.77
  -3  -1  -3  152.58    2.52
   3  -1   3  153.22    2.53
  -3  -1  -3  155.59    2.77
   3  -1   3  149.76    2.69
  -3   1  -3  153.93    2.77
  -3   1  -3  151.32    2.54
   3   1   3  150.57    2.66
  -3   1  -3  155.27    2.83
   3   1   3  156.97    2.87
   3   1   3  153.27    2.51
   4  -1   3    0.26    0.08
  -4  -1  -3    0.01    0.11
  -4  -1  -3    0.33    0.15
  -4   1  -3    0.74    0.18
  -4   1  -3    0.50    0.16
   4   1   3    0.46    0.09
  -4   1  -3    0.38    0.13
   4   1   3    0.37    0.16
   5  -1   3   -0.02    0.07
  -5  -1  -3   -0.17    0.13
   5   1   3   -0.11    0.05
  -5   1  -3    0.06    0.15
   5   1   3    0.05    0.14
  -5   1  -3    0.16    0.18
   6  -1   3    2.47    0.21
  -6  -1  -3    3.01    0.43
  -6   1  -3    2.46    0.39
  -6   1  -3    2.64    0.36
   6   1   3    2.42    0.19
   7  -1   3    0.79    0.16
  -7  -1  -3    0.17    0.27
  -7  -1  -3    0.30    0.25
  -7   1  -3    0.57    0.23
   7   1   3    0.32    0.11
  -7   1  -3    0.44    0.26
   8  -1   3    0.27    0.13
  -8  -1  -3   -0.16    0.21
  -8  -1  -3    0.42    0.30
  -8   1  -3    0.07    0.25
   8   1   3    0.17    0.12
   9  -1   3    3.17    0.29
   9   1   3    3.19    0.28
  -9   1  -3    2.99    0.61
   9  -2  -3    0.05    0.15
  -9  -2   3   -0.65    0.19
   9   2  -3    0.27    0.14
  -9   2   3    0.25    0.24
   8  -2  -3    3.30    0.29
  -8  -2   3    3.70    0.54
   8  -2  -3    3.45    0.31
  -8   2   3    3.62    0.53
   8   2  -3    3.75    0.28
   8   2  -3    3.86    0.35
  -7  -2   3    2.09    0.39
   7  -2  -3    2.00    0.24
   7  -2  -3    2.55    0.23
  -7   2   3    1.83    0.38
   7   2  -3    1.90    0.23
   7   2  -3    2.12    0.29
  -7   2   3    2.39    0.37
   6  -2  -3    0.24    0.12
  -6  -2   3    0.23    0.18
   6  -2  -3    0.26    0.12
  -6   2   3    0.46    0.15
  -6   2   3    0.46    0.17
   6   2  -3    0.31    0.11
   6   2  -3    0.02    0.13
   5  -2  -3    3.05    0.20
   5  -2  -3    3.14    0.22
  -5  -2   3    3.81    0.44
  -5  -2   3    3.46    0.29
   5   2  -3    3.91    0.27
  -5   2   3    3.11    0.23
   5   2  -3    3.36    0.22
  -5   2   3    2.39    0.34
  -4  -2   3    7.01    0.43
   4  -2  -3    7.55    0.31
  -4  -2   3    6.27    0.34
   4  -2  -3    7.13    0.28
   4   2  -3    7.23    0.34
   4   2  -3    7.06    0.28
  -4   2   3    6.94    0.31
  -4   2   3    7.11    0.43
  -3  -2   3    3.09    0.25
   3  -2  -3    3.36    0.30
   3  -2  -3    3.04    0.20
   3  -2  -3    3.63    0.21
   3  -2  -3    3.53    0.22
  -3  -2   3    3.69    0.30
   3   2  -3    3.56    0.20
   3   2  -3    3.46    0.18
   3   2  -3    3.12    0.25
   3   2  -3    3.78    0.25
  -3   2   3    3.58    0.23
  -3   2   3    3.49    0.28
   2  -2  -3   61.76    1.16
   2  -2  -3   60.34    1.11
  -2  -2   3   60.09    1.24
   2  -2  -3   61.97    1.21
  -2   2   3   60.85    1.22
   2   2  -3   59.44    1.15
   2   2  -3   60.73    1.08
  -2   2   3   59.65    1.18
   1  -2  -3   61.44    1.07
  -1  -2   3   60.32    1.05
   1  -2  -3   61.03    1.20
   1  -2  -3   60.36    1.09
  -1  -2   3   60.06    1.07
  -1  -2   3   61.79    1.23
   1   2  -3   59.80    1.05
  -1   2   3   60.56    1.19
   1   2  -3   60.41    1.21
  -1   2   3   61.55    1.09
   1   2  -3   60.53    1.04
  -1   2   3   62.34    1.09
   0  -2   3  182.27    3.06
   0  -2  -3  179.40    3.05
   0   2  -3  182.32    3.05
   0   2   3  174.46    3.03
   2  -2   3    1.94    0.12
  -2  -2  -3    2.19    0.25
   2  -2   3    1.82    0.18
  -2  -2  -3    2.06    0.11
  -2  -2  -3    2.11    0.18
  -2   2  -3    1.97    0.12
   2   2   3    2.18    0.23
   2   2   3    2.08    0.15
  -2   2  -3    2.07    0.20
   2   2   3    2.14    0.11
  -2   2  -3    1.89    0.17
   3  -2   3   13.29    0.49
  -3  -2  -3   12.65    0.35
  -3  -2  -3   13.32    0.51
   3  -2   3   13.42    0.37
  -3  -2  -3   13.54    0.52
   3   2   3   13.96    0.36
  -3   2  -3   12.57    0.48
   3   2   3   13.10    0.45
  -3   2  -3   13.73    0.51
   3   2   3   13.59    0.57
  -3   2  -3   13.30    0.53
   4  -2   3   33.59    0.75
  -4  -2  -3   33.93    0.99
  -4   2  -3   34.34    0.99
   4   2   3   33.67    1.02
  -4   2  -3   35.33    0.98
   4   2   3   33.66    0.72
  -4   2  -3   32.78    0.87
   5  -2   3    0.24    0.09
  -5  -2  -3    0.32    0.21
   5   2   3   -0.03    0.14
  -5   2  -3    0.06    0.16
  -5   2  -3    0.12    0.14
   5   2   3    0.37    0.09
  -5   2  -3    0.29    0.17
  -6  -2  -3    0.07    0.18
   6  -2   3   -0.12    0.07
  -6   2  -3   -0.06    0.14
  -6   2  -3   -0.16    0.17
   6   2   3    0.13    0.09
   6   2   3   -0.07    0.16
  -7  -2  -3    2.62    0.43
  -7  -2  -3    2.15    0.41
   7  -2   3    2.50    0.22
  -7   2  -3    1.90    0.37
  -7   2  -3    2.81    0.39
   7   2   3    2.49    0.21
  -8  -2  -3   -0.16    0.26
  -8  -2  -3    0.31    0.29
   8  -2   3    0.50    0.15
   8   2   3    0.10    0.13
  -8   2  -3   -0.16    0.22
  -8   2  -3    0.29    0.27
   9  -2   3    0.35    0.15
  -9   2  -3    0.34    0.47
   9   2   3    0.40    0.14
   9  -3  -3   -0.14    0.14
  -9  -3   3   -0.14    0.29
  -9   3   3   -0.59    0.23
   9   3  -3   -0.04    0.12
   8  -3  -3    0.13    0.10
  -8  -3   3    0.08    0.27
   8   3  -3    0.11    0.18
   8   3  -3    0.06    0.12
  -8   3   3   -0.06    0.22
   7  -3  -3    3.00    0.26
  -7  -3   3    3.30    0.49
  -7   3   3    3.24    0.25
   7   3  -3    2.87    0.24
   7   3  -3    3.10    0.33
  -7   3   3    2.71    0.42
  -6  -3   3    3.74    0.47
   6  -3  -3    4.54    0.29
  -6   3   3    4.11    0.26
   6   3  -3    3.79    0.32
   6   3  -3    4.39    0.26
  -6   3   3    3.82    0.41
   5  -3  -3    2.66    0.19
   5  -3  -3    2.86    0.25
  -5  -3   3    3.53    0.37
  -5   3   3    2.73    0.35
  -5   3   3    3.38    0.23
   5   3  -3    3.32    0.21
   5   3  -3    3.27    0.27
   4  -3  -3   82.51    1.56
   4  -3  -3   83.59    1.47
  -4  -3   3   83.76    1.84
  -4  -3   3   81.27    1.69
   4   3  -3   87.25    1.61
  -4   3   3   81.63    1.54
   4   3  -3   82.16    1.65
  -4   3   3   85.02    1.84
   4   3  -3   81.38    1.50
   3  -3  -3    0.86    0.13
  -3  -3   3    1.38    0.22
   3  -3  -3    1.00    0.20
   3  -3  -3    1.48    0.17
   3  -3  -3    1.91    0.16
   3   3  -3    1.54    0.14
   3   3  -3    1.37    0.19
  -3   3   3    1.08    0.15
   3   3  -3    1.07    0.19
  -3   3   3    1.51    0.22
  -2  -3   3    0.77    0.14
  -2  -3   3    0.94    0.11
   2  -3  -3    1.06    0.15
  -2  -3   3    1.03    0.17
   2  -3  -3    0.84    0.11
   2  -3  -3    0.89    0.13
  -2   3   3    1.12    0.14
   2   3  -3    0.89    0.12
   2   3  -3    0.96    0.16
  -2   3   3    0.78    0.13
   2   3  -3    0.93    0.09
   1  -3  -3  128.77    2.25
  -1  -3   3  129.19    2.11
  -1  -3   3  133.35    2.09
   1  -3  -3  129.59    2.16
  -1  -3   3  130.37    2.30
   1  -3  -3  130.18    2.12
  -1   3   3  130.61    2.14
   1   3  -3  128.51    2.07
   1   3  -3  132.51    2.29
   1   3  -3  127.94    2.09
  -1   3   3  126.71    2.13
  -1   3   3  128.34    2.24
   0  -3  -3  120.89    2.18
   0  -3   3  122.42    1.90
   0  -3  -3  121.64    2.17
   0  -3  -3  120.78    1.93
   0  -3   3  122.81    2.18
   0  -3   3  122.66    1.90
   0  -3  -3  119.26    1.95
   0   3   3  122.53    1.97
   0   3  -3  120.78    2.16
   0   3  -3  122.60    1.94
  -1  -3  -3   74.71    1.52
  -1  -3  -3   77.62    1.27
   1  -3   3   76.80    1.30
  -1  -3  -3   79.85    1.32
   1  -3   3   76.47    1.51
   1  -3   3   79.01    1.33
  -1   3  -3   74.66    1.30
  -1   3  -3   77.29    1.31
   1   3   3   77.91    1.28
  -1   3  -3   77.69    1.51
   1   3   3   78.15    1.57
   1   3   3   77.78    1.29
   2  -3   3   16.70    0.40
  -2  -3  -3   14.80    0.52
   2  -3   3   15.17    0.52
  -2  -3  -3   15.62    0.36
  -2  -3  -3   16.39    0.64
   2  -3   3   16.09    0.47
   2   3   3   16.93    0.60
   2   3   3   16.10    0.43
   2   3   3   16.31    0.36
  -2   3  -3   16.14    0.47
  -2   3  -3   17.01    0.40
  -2   3  -3   16.40    0.62
  -3  -3  -3   30.43    0.82
  -3  -3  -3   28.38    0.81
   3  -3   3   30.32    0.65
  -3  -3  -3   29.73    0.62
   3  -3   3   28.95    0.78
   3   3   3   29.56    0.61
  -3   3  -3   29.24    0.82
  -3   3  -3   29.30    0.80
  -3   3  -3   29.50    0.78
   3   3   3   28.53    0.72
   3   3   3   29.61    0.90
   4  -3   3   14.48    0.43
  -4  -3  -3   15.05    0.62
   4   3   3   14.41    0.64
  -4   3  -3   13.57    0.56
   4   3   3   14.23    0.40
  -4   3  -3   15.31    0.61
  -4   3  -3   14.59    0.52
   5  -3   3   12.25    0.42
  -5  -3  -3   10.64    0.61
   5   3   3    9.97    0.58
  -5   3  -3   12.06    0.61
  -5   3  -3   11.67    0.55
  -5   3  -3   11.82    0.48
   5   3   3   11.30    0.37
  -6  -3  -3    0.00    0.18
   6  -3   3    0.16    0.10
   6   3   3    0.07    0.07
  -6   3  -3    0.47    0.18
  -6   3  -3   -0.17    0.16
  -7  -3  -3    1.15    0.34
   7  -3   3    1.92    0.22
   7   3   3    1.77    0.20
   7   3   3    1.39    0.33
  -7   3  -3    1.27    0.32
  -7   3  -3    1.42    0.29
   8  -3   3    0.31    0.13
  -8  -3  -3   -0.01    0.26
  -8  -3  -3    0.65    0.29
  -8   3  -3    0.25    0.27
   8   3   3    0.32    0.12
  -8   3  -3    0.64    0.27
   9  -3   3    1.75    0.25
  -9  -3  -3    1.85    0.50
   9   3   3    1.34    0.22
   9  -4  -3    0.66    0.19
   9   4  -3    1.11    0.20
   8  -4  -3    0.09    0.13
  -8  -4   3   -0.06    0.22
  -8   4   3    0.38    0.27
   8   4  -3    0.32    0.19
   8   4  -3    0.02    0.10
   7  -4  -3    0.44    0.10
  -7  -4   3    0.49    0.25
   7  -4  -3    0.49    0.14
   7   4  -3    0.42    0.12
  -7   4   3    0.77    0.28
  -7   4   3    0.48    0.12
  -6  -4   3    0.06    0.20
   6  -4  -3    0.10    0.08
   6  -4  -3   -0.05    0.10
  -6   4   3   -0.05    0.13
   6   4  -3    0.03    0.09
   6   4  -3   -0.09    0.12
  -6   4   3    0.02    0.10
   5  -4  -3   28.92    0.75
  -5  -4   3   27.12    0.99
   5  -4  -3   26.92    0.61
  -5   4   3   26.60    0.65
   5   4  -3   27.94    0.83
   5   4  -3   28.07    0.68
  -5   4   3   29.06    0.99
  -4  -4   3    0.46    0.15
  -4  -4   3    0.14    0.16
   4  -4  -3    0.16    0.07
   4  -4  -3    0.13    0.09
  -4   4   3    0.14    0.12
   4   4  -3    0.13    0.06
  -4   4   3    0.24    0.09
   4   4  -3    0.23    0.08
   4   4  -3    0.71    0.14
   3  -4  -3   49.85    1.18
  -3  -4   3   48.41    1.15
   3  -4  -3   51.32    1.03
   3  -4  -3   56.24    0.98
  -3  -4   3   51.58    1.18
  -3   4   3   50.32    1.00
   3   4  -3   53.42    1.15
   3   4  -3   51.06    0.96
   3   4  -3   46.86    1.08
   3   4  -3   51.11    0.96
  -3   4   3   51.03    1.20
   2  -4  -3  197.85    3.16
  -2  -4   3  188.91    3.32
   2  -4  -3  197.63    3.19
  -2  -4   3  195.28    3.10
   2  -4  -3  194.15    3.28
  -2  -4   3  196.39    3.24
   2  -4  -3  193.12    3.16
  -2   4   3  196.61    3.27
   2   4  -3  195.87    3.31
   2   4  -3  196.87    3.08
   2   4  -3  193.40    3.19
  -2   4   3  186.39    3.18
   1  -4  -3    5.19    0.25
  -1  -4   3    5.20    0.27
   1  -4  -3    5.42    0.22
  -1  -4   3    5.27    0.19
   1  -4  -3    5.27    0.19
  -1  -4   3    5.25    0.17
   1   4  -3    4.86    0.15
   1   4  -3    5.19    0.31
  -1   4   3    5.01    0.20
   1   4  -3    5.09    0.18
   0  -4   3  596.53   12.89
   0   4   3  596.53   10.27
   0   4  -3  595.77   13.18
   1  -4   3   68.68    1.21
  -1  -4  -3   69.40    1.19
  -1  -4  -3   66.57    1.39
   1  -4   3   68.80    1.38
   1  -4   3   67.18    1.17
  -1  -4  -3   67.77    1.14
  -1   4  -3   67.49    1.18
   1   4   3   69.43    1.15
   1   4   3   71.66    1.45
  -1   4  -3   69.68    1.17
   1   4   3   68.08    1.17
  -1   4  -3   66.08    1.36
  -2  -4  -3   14.87    0.33
   2  -4   3   13.83    0.49
   2  -4   3   14.26    0.46
   2  -4   3   14.67    0.37
  -2  -4  -3   14.94    0.54
  -2  -4  -3   14.08    0.44
  -2   4  -3   14.05    0.50
   2   4   3   14.52    0.40
   2   4   3   15.37    0.58
  -2   4  -3   15.06    0.52
  -2   4  -3   14.08    0.37
  -3  -4  -3    0.44    0.08
  -3  -4  -3    0.27    0.15
   3  -4   3    0.38    0.08
  -3  -4  -3    0.46    0.17
   3  -4   3    0.31    0.11
   3   4   3    0.29    0.11
   3   4   3    0.28    0.06
  -3   4  -3    0.09    0.12
   3   4   3    0.36    0.16
  -3   4  -3    0.26    0.12
  -3   4  -3    0.11    0.10
   4  -4   3    6.02    0.27
  -4  -4  -3    5.51    0.40
   4   4   3    5.54    0.41
   4   4   3    6.21    0.23
  -4   4  -3    6.01    0.35
  -4   4  -3    5.69    0.38
  -4   4  -3    6.03    0.38
  -5  -4  -3    4.55    0.43
   5  -4   3    4.44    0.25
   5   4   3    4.29    0.40
  -5   4  -3    4.46    0.35
  -5   4  -3    4.93    0.30
   5   4   3    4.57    0.23
  -5   4  -3    4.50    0.38
  -6  -4  -3    0.26    0.22
   6  -4   3    0.50    0.12
   6   4   3    0.31    0.10
   6   4   3    0.60    0.25
  -6   4  -3    0.24    0.19
  -6   4  -3    0.25    0.19
  -7  -4  -3    1.00    0.31
   7  -4   3    1.12    0.19
   7   4   3    0.89    0.15
  -7   4  -3    0.88    0.30
   7   4   3    0.81    0.28
  -7   4  -3    0.73    0.23
  -8  -4  -3    0.29    0.28
   8  -4   3    0.77    0.16
  -8  -4  -3    0.61    0.30
  -8   4  -3    0.87    0.31
  -8   4  -3    0.79    0.28
   8   4   3    0.80    0.15
  -9  -4  -3    0.43    0.36
  -9  -4  -3   -0.32    0.54
   9  -4   3    0.40    0.16
   9   4   3    0.33    0.16
   9  -5  -3    1.58    0.26
   9   5  -3    0.99    0.31
   9   5  -3    1.32    0.21
  -8  -5   3   -0.24    0.22
   8  -5  -3   -0.02    0.12
   8   5  -3   -0.09    0.11
   8   5  -3    0.19    0.19
  -8   5   3    0.19    0.25
   7  -5  -3   -0.02    0.08
  -7  -5   3   -0.04    0.14
   7   5  -3   -0.15    0.14
  -7   5   3   -0.05    0.18
   7   5  -3   -0.03    0.09
   6  -5  -3    0.80    0.10
   6  -5  -3    0.86    0.18
  -6  -5   3    1.10    0.31
  -6   5   3    0.68    0.23
   6   5  -3    0.93    0.15
   6   5  -3    0.43    0.18
  -6   5   3    0.91    0.11
   5  -5  -3    0.13    0.06
  -5  -5   3    0.13    0.21
   5  -5  -3    0.28    0.12
  -5   5   3    0.08    0.14
   5   5  -3    0.12    0.08
  -5   5   3    0.21    0.07
   5   5  -3   -0.02    0.12
   4  -5  -3    4.87    0.26
   4  -5  -3    4.66    0.17
  -4  -5   3    4.42    0.36
   4   5  -3    4.65    0.22
   4   5  -3    4.57    0.32
   4   5  -3    4.75    0.22
  -4   5   3    4.96    0.21
  -4   5   3    4.96    0.37
   3  -5  -3   48.31    0.90
  -3  -5   3   44.88    1.12
  -3  -5   3   48.53    1.14
   3  -5  -3   48.35    1.00
   3   5  -3   50.58    1.13
   3   5  -3   48.27    0.91
  -3   5   3   49.12    1.15
   3   5  -3   46.91    1.14
   3   5  -3   48.84    0.91
  -3   5   3   49.13    0.94
  -2  -5   3   50.38    1.05
  -2  -5   3   51.25    0.91
   2  -5  -3   50.22    1.00
   2  -5  -3   49.98    0.98
   2  -5  -3   50.37    0.98
  -2  -5   3   49.05    1.24
   2  -5  -3   50.17    1.09
  -2   5   3   51.25    1.07
   2   5  -3   51.20    1.01
   2   5  -3   49.64    0.89
   2   5  -3   51.57    1.13
   1  -5  -3    0.33    0.09
  -1  -5   3    0.32    0.05
   1  -5  -3    0.29    0.07
  -1  -5   3    0.35    0.07
   1  -5  -3    0.33    0.06
   1  -5  -3    0.24    0.10
  -1  -5   3    0.30    0.11
   1   5  -3    0.34    0.05
  -1   5   3    0.40    0.08
   1   5  -3    0.45    0.12
  -1   5   3    0.25    0.06
   1   5  -3    0.29    0.05
   0  -5  -3  166.80    2.87
   0  -5   3  167.06    2.89
   0  -5   3  166.64    2.64
   0   5   3  164.27    2.89
   0   5  -3  169.24    2.63
  -1  -5  -3   53.99    0.93
   1  -5   3   55.58    1.18
  -1  -5  -3   53.76    1.19
  -1  -5  -3   55.48    1.01
   1  -5   3   55.45    0.98
   1  -5   3   56.80    1.03
  -1   5  -3   54.68    1.16
   1   5   3   55.01    0.99
  -1   5  -3   54.89    0.99
   1   5   3   55.60    0.95
  -1   5  -3   55.60    0.98
   1   5   3   55.32    1.24
  -2  -5  -3   38.65    0.97
  -2  -5  -3   37.48    0.69
   2  -5   3   37.86    0.75
   2  -5   3   38.40    0.87
  -2  -5  -3   38.84    0.85
   2  -5   3   37.45    0.91
   2   5   3   37.05    1.00
   2   5   3   38.58    0.70
   2   5   3   36.64    0.79
  -2   5  -3   37.47    0.76
  -2   5  -3   39.44    0.85
  -2   5  -3   37.97    0.93
   3  -5   3   16.98    0.46
   3  -5   3   16.69    0.58
  -3  -5  -3   17.82    0.60
   3   5   3   17.41    0.40
   3   5   3   16.81    0.66
   3   5   3   15.54    0.50
  -3   5  -3   18.18    0.57
  -3   5  -3   16.63    0.57
  -3   5  -3   16.96    0.57
  -4  -5  -3    1.56    0.15
  -4  -5  -3    1.47    0.25
   4  -5   3    1.48    0.14
   4   5   3    1.47    0.11
  -4   5  -3    1.55    0.22
   4   5   3    1.12    0.24
  -4   5  -3    1.96    0.27
  -4   5  -3    1.72    0.21
  -5  -5  -3    7.23    0.51
   5  -5   3    7.41    0.33
   5   5   3    7.46    0.28
  -5   5  -3    7.44    0.42
   5   5   3    7.39    0.51
  -5   5  -3    6.89    0.48
  -5   5  -3    7.15    0.36
   6  -5   3    1.71    0.21
  -6  -5  -3    2.06    0.36
  -6   5  -3    1.37    0.24
   6   5   3    1.55    0.30
  -6   5  -3    1.78    0.22
   6   5   3    1.65    0.18
  -6   5  -3    1.78    0.33
   7  -5   3    3.86    0.28
  -7  -5  -3    3.33    0.51
   7   5   3    4.15    0.52
  -7   5  -3    3.28    0.45
  -7   5  -3    4.73    0.37
   7   5   3    4.36    0.26
   8  -5   3    0.12    0.11
  -8  -5  -3   -0.59    0.21
  -8   5  -3   -0.04    0.21
   8   5   3    0.18    0.10
  -9  -5  -3    0.91    0.46
   9  -5   3    0.94    0.21
  -9  -5  -3    0.56    0.41
   9   5   3    0.57    0.17
  -9   5  -3    0.62    0.54
  -9  -6   3    0.69    0.62
   9  -6  -3    0.04    0.16
   9   6  -3   -0.22    0.26
   9   6  -3    0.23    0.14
  -9   6   3    0.28    0.36
  -8  -6   3    2.42    0.48
   8  -6  -3    2.31    0.30
   8   6  -3    2.49    0.22
   8   6  -3    2.56    0.39
  -8   6   3    2.34    0.44
   7  -6  -3   -0.03    0.09
  -7  -6   3    0.15    0.25
  -7   6   3    0.43    0.33
   7   6  -3    0.07    0.17
   7   6  -3    0.28    0.11
   6  -6  -3    0.95    0.18
  -6  -6   3    0.61    0.25
   6   6  -3    0.78    0.14
  -6   6   3    0.70    0.22
  -5  -6   3    7.42    0.54
   5  -6  -3    7.30    0.35
   5   6  -3    6.71    0.42
   5   6  -3    7.64    0.30
  -5   6   3    7.13    0.49
   4  -6  -3    1.23    0.16
   4  -6  -3    1.01    0.08
  -4  -6   3    1.00    0.22
  -4   6   3    1.61    0.24
   4   6  -3    1.21    0.11
   4   6  -3    1.27    0.12
   4   6  -3    1.11    0.22
   3  -6  -3   71.08    1.20
   3  -6  -3   69.59    1.33
  -3  -6   3   65.20    1.48
   3  -6  -3   66.80    1.22
  -3  -6   3   69.38    1.47
   3   6  -3   68.71    1.22
   3   6  -3   69.41    1.47
  -3   6   3   70.30    1.49
   3   6  -3   68.76    1.21
   2  -6  -3    5.38    0.24
   2  -6  -3    5.57    0.25
   2  -6  -3    5.25    0.24
   2  -6  -3    5.78    0.31
   2  -6  -3    4.96    0.23
  -2  -6   3    5.67    0.34
  -2  -6   3    5.41    0.20
  -2  -6   3    5.70    0.28
   2   6  -3    5.22    0.33
   2   6  -3    5.21    0.17
  -2   6   3    5.90    0.30
  -1  -6   3    0.59    0.09
   1  -6  -3    0.82    0.13
   1  -6  -3    0.61    0.10
  -1  -6   3    0.62    0.07
   1  -6  -3    0.71    0.09
   1  -6  -3    0.80    0.14
  -1  -6   3    0.83    0.15
  -1   6   3    0.81    0.11
   1   6  -3    0.67    0.08
   1   6  -3    0.82    0.06
   1   6  -3    0.74    0.16
  -1   6   3    0.64    0.09
   0  -6  -3    5.68    0.20
   0  -6   3    5.29    0.18
   0  -6   3    5.40    0.18
   0  -6   3    5.28    0.29
   0  -6  -3    5.53    0.28
   0  -6   3    5.46    0.17
   0  -6  -3    5.41    0.18
   0   6  -3    5.38    0.17
   0   6  -3    5.50    0.29
   0   6   3    5.41    0.19
   1  -6   3    3.06    0.23
  -1  -6  -3    3.32    0.16
   1  -6   3    3.06    0.14
   1  -6   3    3.34    0.18
  -1  -6  -3    3.45    0.12
   1   6   3    3.58    0.27
   1   6   3    3.37    0.13
  -1   6  -3    3.42    0.16
  -1   6  -3    3.44    0.15
   1   6   3    3.65    0.16
   2  -6   3    0.43    0.13
  -2  -6  -3    0.59    0.14
   2  -6   3    0.66    0.16
  -2  -6  -3    0.49    0.07
   2  -6   3    0.48    0.09
  -2  -6  -3    0.55    0.16
   2   6   3    0.39    0.17
   2   6   3    0.51    0.07
  -2   6  -3    0.54    0.09
  -2   6  -3    0.51    0.11
  -3  -6  -3   28.36    0.58
  -3  -6  -3   27.05    0.77
   3  -6   3   29.00    0.65
   3  -6   3   27.30    0.79
  -3   6  -3   28.22    0.77
  -3   6  -3   28.22    0.77
  -3   6  -3   29.15    0.76
   3   6   3   29.12    0.92
   3   6   3   28.46    0.57
   4  -6   3    0.81    0.12
  -4  -6  -3    0.96    0.11
  -4  -6  -3    1.15    0.24
  -4   6  -3    0.86    0.16
   4   6   3    0.83    0.10
  -4   6  -3    1.08    0.19
  -4   6  -3    0.77    0.17
   4   6   3    0.84    0.20
   5  -6   3   10.28    0.40
  -5  -6  -3   10.63    0.60
   5   6   3    9.37    0.67
   5   6   3    9.56    0.33
  -5   6  -3   10.33    0.56
  -5   6  -3   10.06    0.46
  -5   6  -3    9.76    0.41
   6  -6   3    4.46    0.28
  -6  -6  -3    4.62    0.48
  -6   6  -3    3.95    0.27
  -6   6  -3    4.41    0.33
   6   6   3    4.16    0.51
  -6   6  -3    4.54    0.42
   7   6   3    3.62    0.49
  -7   6  -3    3.43    0.31
   7   6   3    3.67    0.23
  -7   6  -3    3.22    0.46
  -8  -6  -3    0.12    0.26
   8  -6   3    0.29    0.12
   8   6   3   -0.03    0.28
  -8   6  -3    0.63    0.29
   8   6   3    0.32    0.12
  -9  -6  -3    2.29    0.51
   9  -6   3    2.95    0.48
  -9  -6  -3    2.48    0.52
  -9   6  -3    2.63    0.51
   9   6   3    2.70    0.24
   9  -7  -3   -0.19    0.13
  -9  -7   3   -0.10    0.34
   9   7  -3   -0.11    0.24
   9   7  -3   -0.05    0.15
  -9   7   3   -0.22    0.23
  -8  -7   3    0.23    0.28
   8  -7  -3    0.84    0.18
   8   7  -3    0.77    0.26
  -8   7   3    0.65    0.27
   8   7  -3    0.65    0.15
   7  -7  -3    4.56    0.34
   7   7  -3    4.60    0.27
   7   7  -3    4.74    0.43
   6  -7  -3   12.80    0.52
  -6  -7   3   13.98    0.78
   6   7  -3   13.32    0.43
   6   7  -3   14.01    0.65
  -6   7   3   14.45    0.73
   5  -7  -3    0.56    0.15
  -5  -7   3    0.98    0.28
   5   7  -3    0.35    0.15
  -5   7   3    0.75    0.22
   5   7  -3    0.49    0.11
  -4  -7   3    9.57    0.51
   4  -7  -3    9.44    0.38
   4   7  -3    9.67    0.30
  -4   7   3    9.32    0.49
   4   7  -3    9.13    0.30
   4   7  -3    9.63    0.47
   3  -7  -3    0.02    0.05
  -3  -7   3    0.10    0.12
   3  -7  -3   -0.04    0.06
   3  -7  -3   -0.10    0.06
   3   7  -3    0.07    0.13
   3   7  -3    0.03    0.04
  -3   7   3   -0.02    0.09
   3   7  -3    0.08    0.07
   2  -7  -3    2.56    0.18
  -2  -7   3    3.06    0.22
   2  -7  -3    2.65    0.23
   2  -7  -3    2.69    0.18
  -2  -7   3    2.79    0.14
   2  -7  -3    2.43    0.17
  -2  -7   3    2.68    0.28
   2  -7  -3    2.19    0.18
   2   7  -3    2.72    0.29
   2   7  -3    2.59    0.11
  -2   7   3    2.74    0.22
   2   7  -3    2.54    0.18
  -1  -7   3    9.48    0.42
   1  -7  -3   10.12    0.36
   1  -7  -3    9.64    0.34
   1  -7  -3    9.87    0.30
  -1  -7   3    9.69    0.24
  -1   7   3   10.68    0.32
  -1   7   3   10.32    0.39
   1   7  -3    8.88    0.40
  -1   7   3   10.49    0.33
   1   7  -3   10.23    0.30
   1   7  -3    9.64    0.23
   0  -7   3   63.39    1.14
   0  -7   3   63.41    1.14
   0  -7   3   63.62    1.09
   0  -7  -3   63.35    1.11
   0  -7   3   66.09    1.36
   0  -7  -3   66.14    1.33
   0  -7  -3   65.57    1.17
   0   7  -3   64.67    1.33
   0   7   3   63.59    1.35
   0   7   3   64.30    1.13
   0   7  -3   64.63    1.09
  -1  -7  -3    1.85    0.09
  -1  -7  -3    1.77    0.13
   1  -7   3    1.68    0.21
  -1  -7  -3    2.01    0.21
   1  -7   3    1.63    0.11
   1  -7   3    1.75    0.14
  -1   7  -3    1.78    0.13
   1   7   3    1.89    0.10
   1   7   3    1.98    0.13
   1   7   3    2.16    0.27
  -1   7  -3    1.89    0.20
   2  -7   3   40.49    0.98
  -2  -7  -3   41.28    1.05
  -2  -7  -3   41.80    0.74
   2  -7   3   41.09    0.82
  -2  -7  -3   42.22    0.92
   2   7   3   40.70    0.74
  -2   7  -3   40.71    0.90
  -2   7  -3   40.64    0.82
   2   7   3   40.61    0.86
  -2   7  -3   42.24    1.07
   2   7   3   41.78    1.11
   3  -7   3    0.93    0.12
  -3  -7  -3    1.07    0.18
  -3  -7  -3    1.00    0.09
  -3   7  -3    1.47    0.21
  -3   7  -3    1.02    0.17
   3   7   3    1.11    0.08
   3   7   3    0.85    0.20
  -4  -7  -3    1.32    0.12
  -4  -7  -3    1.75    0.28
   4   7   3    1.43    0.11
   4   7   3    1.25    0.28
  -4   7  -3    1.70    0.22
  -4   7  -3    1.74    0.24
  -4   7  -3    1.63    0.21
   5  -7   3   12.27    0.45
  -5  -7  -3   12.25    0.66
   5   7   3   10.45    0.64
  -5   7  -3   12.79    0.50
  -5   7  -3   10.85    0.58
   5   7   3   12.53    0.36
  -5   7  -3   11.29    0.48
  -6  -7  -3    4.10    0.52
   6  -7   3    3.46    0.25
  -6   7  -3    3.96    0.30
   6   7   3    3.27    0.47
  -6   7  -3    3.02    0.26
   6   7   3    3.71    0.21
  -6   7  -3    3.92    0.47
  -7  -7  -3    0.52    0.29
   7  -7   3    1.00    0.19
   7   7   3    0.99    0.15
  -7   7  -3    1.16    0.19
   7   7   3    1.06    0.28
  -8  -7  -3    0.62    0.35
   8  -7   3    0.88    0.19
   8   7   3    0.95    0.34
   8   7   3    1.32    0.18
  -8   7  -3    1.34    0.33
  -9  -7  -3    0.25    0.34
   9  -7   3    0.45    0.21
  -9   7  -3    0.30    0.29
   9   7   3    0.77    0.17
   9  -8  -3   -0.06    0.13
  -9  -8   3    0.39    0.35
   9   8  -3    0.22    0.31
   9   8  -3    0.20    0.14
  -9   8   3    0.13    0.27
   8  -8  -3    1.04    0.19
  -8  -8   3    0.77    0.33
   8   8  -3    1.03    0.18
   8   8  -3    0.66    0.26
  -8   8   3    0.20    0.23
   7  -8  -3   13.68    0.64
  -7  -8   3   12.65    0.84
   7   8  -3   12.33    0.68
   7   8  -3   13.31    0.45
  -7   8   3   12.90    0.76
  -6  -8   3   10.01    0.68
   6  -8  -3    9.98    0.46
   6   8  -3   11.43    0.61
  -6   8   3   10.65    0.64
   6   8  -3   10.64    0.37
  -5  -8   3   43.49    1.29
   5  -8  -3   40.71    1.00
  -5   8   3   40.84    1.23
   5   8  -3   42.70    0.87
   5   8  -3   41.67    1.17
  -4  -8   3   12.60    0.59
   4  -8  -3   12.65    0.45
   4   8  -3   12.87    0.35
   4   8  -3   11.87    0.34
   4   8  -3   12.45    0.55
  -4   8   3   12.65    0.57
  -3  -8   3    0.17    0.14
   3  -8  -3    0.05    0.06
   3  -8  -3    0.11    0.09
   3  -8  -3    0.11    0.05
  -3   8   3    0.15    0.10
   3   8  -3   -0.01    0.05
   3   8  -3   -0.19    0.10
   3   8  -3    0.06    0.04
   2  -8  -3   22.78    0.57
   2  -8  -3   21.81    0.57
   2  -8  -3   21.76    0.55
  -2  -8   3   22.11    0.61
  -2  -8   3   21.98    0.46
  -2  -8   3   21.37    0.71
   2  -8  -3   21.88    0.54
   2  -8  -3   21.30    0.65
   2   8  -3   21.80    0.70
  -2   8   3   22.12    0.62
   2   8  -3   22.09    0.57
   2   8  -3   22.27    0.43
  -1  -8   3    1.66    0.09
   1  -8  -3    1.83    0.18
  -1  -8   3    1.81    0.14
   1  -8  -3    1.68    0.16
   1  -8  -3    1.79    0.14
  -1  -8   3    1.61    0.23
   1  -8  -3    1.55    0.13
   1   8  -3    1.73    0.24
   1   8  -3    1.60    0.12
  -1   8   3    2.10    0.21
  -1   8   3    1.69    0.14
   1   8  -3    1.79    0.09
   0  -8  -3    0.68    0.08
   0  -8   3    0.38    0.13
   0  -8   3    0.62    0.10
   0  -8  -3    0.50    0.14
   0  -8   3    0.83    0.10
   0  -8  -3    0.53    0.09
   0   8   3    0.61    0.09
   0   8  -3    0.59    0.07
   0   8  -3    0.34    0.14
   0   8   3    0.63    0.16
   1  -8   3   25.58    0.72
   1  -8   3   25.60    0.54
  -1  -8  -3   25.21    0.59
  -1  -8  -3   25.44    0.49
   1  -8   3   26.46    0.62
  -1  -8  -3   25.36    0.74
   1   8   3   25.15    0.51
  -1   8  -3   25.40    0.58
   1   8   3   25.99    0.59
   1   8   3   26.13    0.79
  -1   8  -3   23.88    0.53
  -1   8  -3   25.57    0.70
   2  -8   3  108.90    2.06
  -2  -8  -3  108.06    1.97
   2  -8   3  109.42    2.03
   2  -8   3  110.09    1.87
  -2  -8  -3  108.48    1.76
  -2   8  -3  111.06    1.97
  -2   8  -3  109.98    2.03
   2   8   3  106.44    1.92
   2   8   3  111.70    2.23
   2   8   3  107.62    1.77
   3  -8   3   -0.02    0.04
  -3  -8  -3   -0.02    0.10
   3  -8   3    0.04    0.08
  -3  -8  -3    0.02    0.04
   3   8   3    0.02    0.04
  -3   8  -3    0.13    0.08
  -3   8  -3    0.01    0.10
   3   8   3    0.18    0.14
  -4  -8  -3   11.20    0.54
   4  -8   3   11.15    0.39
  -4  -8  -3   10.09    0.31
   4   8   3   10.79    0.60
  -4   8  -3   11.79    0.53
  -4   8  -3   10.90    0.42
  -4   8  -3   10.94    0.44
   4   8   3   10.80    0.30
  -5  -8  -3    8.62    0.55
   5  -8   3    8.98    0.38
  -5   8  -3    8.65    0.40
  -5   8  -3    8.86    0.52
  -5   8  -3    7.94    0.35
   5   8   3    8.39    0.29
   5   8   3    8.54    0.58
  -6  -8  -3    4.02    0.51
   6  -8   3    3.87    0.27
  -6   8  -3    3.96    0.39
  -6   8  -3    3.69    0.25
   6   8   3    3.66    0.20
  -6   8  -3    4.15    0.29
   6   8   3    4.19    0.52
  -7  -8  -3    0.72    0.32
   7  -8   3    0.69    0.15
   7   8   3    0.82    0.30
   7   8   3    0.61    0.11
  -7   8  -3    0.65    0.30
  -8  -8  -3    1.41    0.41
   8  -8   3    1.37    0.23
   8   8   3    1.49    0.19
   8   8   3    0.92    0.36
  -8   8  -3    1.36    0.33
  -9  -8  -3    1.30    0.48
   9  -8   3    1.55    0.25
  -9   8  -3    1.88    0.40
   9   8   3    1.69    0.22
  -9  -9   3    0.61    0.31
  -9   9   3    0.40    0.29
   9   9  -3    0.34    0.30
   9   9  -3    0.27    0.14
   8  -9  -3    0.61    0.18
  -8  -9   3    0.71    0.34
   8   9  -3    0.57    0.24
   8   9  -3    0.91    0.16
  -8   9   3    0.59    0.31
  -7  -9   3    0.50    0.29
   7  -9  -3    0.57    0.17
  -7   9   3    0.79    0.27
   7   9  -3    0.96    0.27
   7   9  -3    0.46    0.18
  -6  -9   3   -0.17    0.19
   6  -9  -3    0.13    0.12
   6   9  -3    0.24    0.20
  -6   9   3    0.18    0.16
   6   9  -3    0.08    0.08
  -5  -9   3   36.78    1.19
   5  -9  -3   36.85    0.94
  -5   9   3   36.97    1.16
   5   9  -3   36.37    0.78
   5   9  -3   37.99    0.78
   5   9  -3   37.95    1.12
  -4  -9   3   11.21    0.56
   4   9  -3   11.99    0.33
   4   9  -3   11.56    0.54
   4   9  -3   11.38    0.32
  -4   9   3   12.12    0.57
   3  -9  -3    0.22    0.07
   3  -9  -3    0.15    0.05
  -3  -9   3    0.13    0.12
   3  -9  -3    0.14    0.08
   3   9  -3    0.16    0.05
  -3   9   3    0.12    0.09
   3   9  -3    0.17    0.06
   3   9  -3    0.01    0.13
  -2  -9   3   11.35    0.42
  -2  -9   3   11.26    0.28
   2  -9  -3   11.71    0.38
   2  -9  -3   11.88    0.41
   2  -9  -3   12.54    0.43
   2  -9  -3   11.87    0.36
   2   9  -3   11.64    0.51
   2   9  -3   11.43    0.26
  -2   9   3   11.02    0.42
   2   9  -3   11.23    0.38
  -1  -9   3   13.23    0.29
  -1  -9   3   12.45    0.38
   1  -9  -3   12.42    0.42
   1  -9  -3   12.20    0.36
  -1  -9   3   12.60    0.51
   1  -9  -3   12.75    0.43
   1  -9  -3   12.61    0.36
  -1   9   3   13.45    0.41
   1   9  -3   12.26    0.28
   1   9  -3   12.26    0.51
   0  -9  -3    3.98    0.23
   0  -9   3    4.35    0.16
   0  -9   3    4.44    0.20
   0  -9   3    4.39    0.31
   0  -9  -3    4.99    0.22
   0  -9  -3    4.38    0.17
   0  -9   3    4.51    0.21
   0   9   3    4.20    0.21
   0   9  -3    4.64    0.16
   0   9   3    3.90    0.30
   0   9  -3    4.44    0.31
  -1  -9  -3    0.70    0.12
   1  -9   3    0.80    0.13
   1  -9   3    0.87    0.10
  -1  -9  -3    0.75    0.07
   1  -9   3    0.40    0.15
  -1  -9  -3    0.52    0.16
  -1   9  -3    0.63    0.11
   1   9   3    0.51    0.08
   1   9   3    0.71    0.11
  -1   9  -3    0.77    0.20
  -1   9  -3    0.54    0.08
   1   9   3    0.79    0.19
   2  -9   3    8.87    0.30
  -2  -9  -3    8.87    0.22
   2  -9   3    8.53    0.37
  -2  -9  -3    8.77    0.36
   2  -9   3    8.84    0.41
  -2   9  -3    9.16    0.39
  -2   9  -3    8.99    0.35
   2   9   3    9.47    0.34
   2   9   3    8.58    0.23
   2   9   3    8.36    0.47
  -3  -9  -3   22.16    0.69
   3  -9   3   22.41    0.57
  -3  -9  -3   22.24    0.46
   3  -9   3   20.62    0.64
   3   9   3   22.90    0.50
  -3   9  -3   21.74    0.63
  -3   9  -3   22.84    0.68
   3   9   3   22.74    0.84
  -4  -9  -3    9.60    0.29
  -4  -9  -3    9.84    0.51
   4  -9   3   10.60    0.38
   4   9   3    9.68    0.28
   4   9   3   10.92    0.70
  -4   9  -3   10.44    0.50
  -4   9  -3    9.53    0.40
  -4   9  -3   10.11    0.41
   5  -9   3    8.71    0.38
  -5  -9  -3    9.03    0.59
   5   9   3    9.12    0.61
  -5   9  -3    7.78    0.50
   5   9   3    8.32    0.28
  -5   9  -3    8.49    0.38
  -5   9  -3    8.29    0.35
   6  -9   3   11.38    0.47
  -6  -9  -3   11.14    0.70
   6   9   3   11.02    0.72
  -6   9  -3   11.13    0.37
  -6   9  -3   10.74    0.63
   6   9   3   11.44    0.36
   7  -9   3   -0.02    0.09
  -7  -9  -3   -0.30    0.18
   7   9   3    0.23    0.25
  -7   9  -3    0.04    0.15
   7   9   3    0.03    0.08
  -7   9  -3    0.13    0.11
   8  -9   3    0.01    0.11
  -8  -9  -3    0.39    0.29
  -8   9  -3    0.06    0.22
   8   9   3    0.57    0.30
   8   9   3    0.12    0.09
   9  -9   3    1.99    0.28
  -9  -9  -3    1.63    0.48
  -9   9  -3    1.14    0.39
   9   9   3    2.29    0.28
   9   9   3    1.92    0.48
  -9 -10   3   -0.31    0.35
   9 -10  -3    0.19    0.16
  -9  10   3   -0.01    0.23
   9  10  -3   -0.19    0.23
   8 -10  -3    4.91    0.37
  -8 -10   3    4.47    0.64
   8  10  -3    5.51    0.51
  -8  10   3    4.94    0.52
   8  10  -3    5.16    0.28
   7 -10  -3    1.50    0.23
  -7 -10   3    1.50    0.38
   7  10  -3    1.52    0.17
   7  10  -3    1.43    0.32
  -7  10   3    1.30    0.31
  -6 -10   3    1.08    0.32
   6 -10  -3    1.09    0.20
  -6  10   3    1.46    0.29
   6  10  -3    1.07    0.13
   6  10  -3    1.33    0.29
   5 -10  -3    0.56    0.16
  -5 -10   3    0.41    0.24
   5  10  -3    0.59    0.10
   5  10  -3    0.65    0.10
   5  10  -3    0.68    0.22
  -5  10   3    0.54    0.21
   4 -10  -3    3.49    0.25
  -4  10   3    4.09    0.33
   4  10  -3    3.71    0.33
   4  10  -3    3.64    0.17
   4  10  -3    3.62    0.16
   3 -10  -3    0.35    0.11
   3 -10  -3    0.42    0.06
  -3 -10   3    0.26    0.15
   3 -10  -3    0.43    0.08
  -3  10   3    0.31    0.13
   3  10  -3    0.39    0.06
   3  10  -3    0.46    0.18
   3  10  -3    0.34    0.07
  -2 -10   3   11.38    0.28
  -2 -10   3   11.63    0.43
   2 -10  -3   11.87    0.39
   2 -10  -3   11.73    0.37
   2 -10  -3   11.60    0.41
   2  10  -3   11.97    0.26
   2  10  -3   11.02    0.43
  -2  10   3   11.89    0.44
   2  10  -3   11.56    0.51
  -1 -10   3   99.04    1.60
  -1 -10   3   98.44    1.76
   1 -10  -3  100.94    1.83
   1 -10  -3   95.31    1.70
  -1 -10   3   98.15    1.97
   1 -10  -3   98.00    1.82
   1 -10  -3   97.65    1.71
   1  10  -3   93.87    1.74
   1  10  -3   98.64    1.96
  -1  10   3   97.64    1.78
   1  10  -3  100.79    1.60
  -1  10   3  102.12    1.90
   0 -10   3    0.13    0.05
   0 -10   3    0.13    0.15
   0 -10  -3    0.18    0.08
   0 -10   3    0.08    0.07
   0 -10  -3    0.17    0.07
   0 -10  -3    0.16    0.06
   0 -10  -3    0.23    0.12
   0  10   3    0.11    0.16
   0  10  -3    0.18    0.17
   0  10  -3    0.14    0.05
   0  10   3    0.12    0.09
  -1 -10  -3  297.76    5.02
   1 -10   3  295.31    4.83
   1 -10   3  295.76    5.14
   1  10   3  301.65    5.11
  -1  10  -3  305.13    4.96
  -1  10  -3  299.16    4.71
  -2 -10  -3    0.98    0.16
   2 -10   3    1.12    0.11
   2 -10   3    1.08    0.19
   2 -10   3    0.95    0.17
  -2 -10  -3    1.16    0.07
  -2  10  -3    1.25    0.19
   2  10   3    1.17    0.24
   2  10   3    1.05    0.08
  -2  10  -3    1.28    0.16
  -3 -10  -3    5.07    0.17
   3 -10   3    5.01    0.30
   3 -10   3    5.33    0.25
  -3 -10  -3    5.36    0.33
   3  10   3    5.57    0.18
  -3  10  -3    5.41    0.30
  -3  10  -3    5.47    0.31
   3  10   3    5.76    0.42
  -4 -10  -3   18.58    0.83
   4 -10   3   20.83    0.59
  -4  10  -3   20.04    0.60
  -4  10  -3   20.56    0.72
   4  10   3   20.60    0.86
  -4  10  -3   20.10    0.59
   4  10   3   19.76    0.44
  -5 -10  -3    0.16    0.16
   5 -10   3    0.07    0.09
  -5  10  -3   -0.02    0.13
   5  10   3   -0.05    0.18
  -5  10  -3    0.04    0.10
   5  10   3    0.03    0.05
   6 -10   3    4.30    0.29
  -6 -10  -3    4.45    0.53
   6  10   3    3.98    0.21
  -6  10  -3    4.14    0.23
  -6  10  -3    3.88    0.21
   6  10   3    3.98    0.53
  -6  10  -3    4.18    0.41
   7 -10   3    8.72    0.44
  -7 -10  -3    8.92    0.68
  -7  10  -3    7.95    0.61
   7  10   3    7.82    0.32
   7  10   3    7.23    0.61
   8 -10   3    0.56    0.17
  -8 -10  -3    0.05    0.24
   8  10   3    0.18    0.10
   8  10   3    0.14    0.26
  -8  10  -3   -0.04    0.21
  -9 -11   3   -0.05    0.31
   9 -11  -3    0.14    0.16
   9  11  -3    0.20    0.28
  -9  11   3    0.22    0.30
  -8 -11   3    1.50    0.41
   8 -11  -3    1.54    0.27
  -8  11   3    1.40    0.31
   8  11  -3    1.39    0.18
   7 -11  -3    0.90    0.19
  -7 -11   3    0.10    0.26
  -7  11   3    0.71    0.27
   7  11  -3    0.67    0.27
   7  11  -3    0.69    0.12
  -6 -11   3    6.28    0.56
   6 -11  -3    5.39    0.35
  -6  11   3    6.06    0.48
   6  11  -3    6.53    0.26
   6  11  -3    5.93    0.49
   5 -11  -3   10.26    0.44
  -5 -11   3    9.40    0.59
   5  11  -3    9.76    0.30
   5  11  -3   10.30    0.31
   5  11  -3   10.89    0.59
  -5  11   3   11.25    0.60
  -4 -11   3    0.69    0.22
   4 -11  -3    0.66    0.15
  -4  11   3    0.39    0.14
   4  11  -3    0.73    0.08
   3 -11  -3    0.10    0.05
  -3 -11   3    0.11    0.11
   3 -11  -3    0.21    0.09
   3 -11  -3    0.11    0.06
   3  11  -3    0.05    0.04
   3  11  -3    0.09    0.03
   3  11  -3   -0.06    0.14
  -3  11   3    0.12    0.08
   2 -11  -3    4.21    0.22
  -2 -11   3    3.88    0.26
   2 -11  -3    4.50    0.23
  -2 -11   3    4.26    0.15
  -2  11   3    4.44    0.27
  -2  11   3    4.28    0.26
   2  11  -3    4.13    0.33
   2  11  -3    4.14    0.13
   1 -11  -3    2.55    0.22
  -1 -11   3    2.51    0.11
  -1 -11   3    2.45    0.18
   1 -11  -3    2.84    0.17
   1 -11  -3    2.59    0.21
   1 -11  -3    2.57    0.18
   1  11  -3    2.78    0.29
  -1  11   3    2.59    0.20
   1  11  -3    2.61    0.17
  -1  11   3    2.72    0.24
   1  11  -3    2.59    0.11
   0 -11  -3   31.30    0.73
   0 -11   3   30.22    0.86
   0 -11  -3   31.65    0.83
   0 -11   3   30.73    0.61
   0 -11   3   31.74    0.72
   0 -11   3   30.82    0.72
   0 -11  -3   31.03    0.63
   0 -11  -3   30.97    0.74
   0  11   3   30.95    0.88
   0  11  -3   31.76    0.62
   0  11  -3   32.06    0.88
   1 -11   3   -0.13    0.11
  -1 -11  -3   -0.09    0.05
  -1 -11  -3    0.05    0.03
   1 -11   3    0.06    0.04
  -1 -11  -3    0.05    0.07
   1 -11   3    0.00    0.07
   1  11   3    0.45    0.17
   1  11   3    0.06    0.06
  -1  11  -3    0.06    0.05
  -1  11  -3    0.12    0.13
  -1  11  -3   -0.01    0.05
  -2 -11  -3    1.91    0.09
  -2 -11  -3    2.26    0.20
   2 -11   3    2.10    0.15
  -2  11  -3    1.90    0.17
   2  11   3    1.83    0.28
  -2  11  -3    2.02    0.22
   2  11   3    2.37    0.11
  -3 -11  -3    2.80    0.25
   3 -11   3    2.72    0.18
   3 -11   3    2.28    0.22
  -3 -11  -3    2.28    0.11
  -3  11  -3    2.68    0.23
  -3  11  -3    2.64    0.23
   3  11   3    2.61    0.36
   3  11   3    2.45    0.12
  -4 -11  -3    1.64    0.27
   4 -11   3    1.48    0.19
  -4 -11  -3    1.37    0.10
  -4  11  -3    1.73    0.30
   4  11   3    1.26    0.10
   4  11   3    1.91    0.35
  -4  11  -3    1.21    0.18
  -4  11  -3    1.49    0.19
   5 -11   3   14.99    0.53
  -5 -11  -3   14.42    0.41
  -5 -11  -3   14.80    0.72
  -5  11  -3   15.74    0.47
  -5  11  -3   14.75    0.47
   5  11   3   15.48    0.81
   5  11   3   14.85    0.38
  -5  11  -3   14.14    0.66
   6 -11   3    1.40    0.20
  -6 -11  -3    1.67    0.37
   6  11   3    1.56    0.13
  -6  11  -3    1.28    0.14
   6  11   3    0.81    0.27
  -6  11  -3    1.40    0.30
  -6  11  -3    1.10    0.12
   7 -11   3    0.72    0.16
  -7 -11  -3    0.86    0.35
   7  11   3    1.34    0.36
  -7  11  -3    0.64    0.25
   7  11   3    0.91    0.15
  -8 -11  -3    3.09    0.58
   8 -11   3    4.14    0.34
  -8  11  -3    4.13    0.55
   8  11   3    4.60    0.64
   8  11   3    4.68    0.26
  -9 -12   3    0.02    0.34
   9 -12  -3    0.88    0.24
  -9  12   3    0.68    0.36
   9  12  -3    0.56    0.35
   8 -12  -3    4.77    0.37
  -8 -12   3    5.32    0.71
  -8  12   3    5.20    0.53
   8  12  -3    4.23    0.54
  -7 -12   3    1.85    0.42
   7 -12  -3    2.13    0.28
   7  12  -3    1.94    0.16
  -7  12   3    2.27    0.40
   7  12  -3    1.63    0.35
  -6 -12   3    0.36    0.24
   6 -12  -3    0.31    0.14
   6  12  -3    0.61    0.23
  -6  12   3    0.48    0.20
   6  12  -3    0.37    0.08
  -5 -12   3    1.15    0.30
   5 -12  -3    0.86    0.17
   5  12  -3    0.66    0.23
  -5  12   3    0.29    0.16
   5  12  -3    0.53    0.09
  -4 -12   3    2.18    0.32
   4 -12  -3    2.10    0.21
   4  12  -3    2.49    0.34
   4  12  -3    2.20    0.11
  -4  12   3    2.46    0.31
   4  12  -3    2.09    0.12
   3 -12  -3    0.01    0.06
  -3 -12   3   -0.03    0.10
   3 -12  -3   -0.05    0.05
   3 -12  -3   -0.03    0.07
   3  12  -3    0.16    0.13
   3  12  -3    0.05    0.04
   3  12  -3    0.08    0.03
  -3  12   3    0.11    0.08
  -2 -12   3   31.11    0.81
   2 -12  -3   30.76    0.72
  -2 -12   3   32.01    0.59
   2 -12  -3   30.94    0.73
   2  12  -3   31.72    0.57
  -2  12   3   32.75    0.83
  -2  12   3   32.68    0.82
   2  12  -3   32.55    0.95
   1 -12  -3    0.43    0.09
   1 -12  -3    0.36    0.12
  -1 -12   3    0.41    0.06
   1 -12  -3    0.36    0.09
  -1 -12   3    0.20    0.08
  -1 -12   3    0.43    0.11
  -1  12   3    0.33    0.10
  -1  12   3    0.61    0.14
   1  12  -3    0.39    0.18
   1  12  -3    0.35    0.05
   0 -12  -3   77.12    1.33
   0 -12   3   74.00    1.43
   0 -12  -3   75.19    1.31
   0 -12   3   73.74    1.42
   0 -12  -3   76.86    1.46
   0 -12   3   76.66    1.29
   0 -12   3   72.98    1.61
   0 -12  -3   73.01    1.55
   0  12   3   74.62    1.63
   0  12  -3   75.94    1.61
   0  12  -3   75.42    1.29
  -1 -12  -3    0.53    0.07
   1 -12   3    0.52    0.09
   1 -12   3    0.59    0.17
  -1 -12  -3    0.49    0.11
   1 -12   3    0.56    0.11
  -1  12  -3    0.56    0.17
  -1  12  -3    0.49    0.08
  -1  12  -3    0.54    0.11
   1  12   3    0.77    0.22
   1  12   3    0.44    0.08
  -2 -12  -3    4.87    0.28
  -2 -12  -3    4.57    0.14
   2 -12   3    4.65    0.31
   2 -12   3    4.74    0.22
  -2  12  -3    4.56    0.26
   2  12   3    4.61    0.16
   2  12   3    4.80    0.38
  -2  12  -3    4.68    0.30
  -3 -12  -3   10.85    0.48
   3 -12   3   11.16    0.46
  -3 -12  -3   10.68    0.26
   3 -12   3   10.61    0.38
   3  12   3   10.16    0.67
   3  12   3   10.81    0.26
  -3  12  -3   10.91    0.43
  -3  12  -3   10.99    0.47
  -4 -12  -3   27.44    0.90
   4 -12   3   26.04    0.70
  -4 -12  -3   25.47    0.54
   4  12   3   26.47    0.53
  -4  12  -3   26.73    0.69
  -4  12  -3   26.32    0.73
   4  12   3   26.80    1.04
  -4  12  -3   25.71    0.83
  -5 -12  -3    5.18    0.47
  -5 -12  -3    4.33    0.20
   5 -12   3    4.23    0.28
   5  12   3    4.85    0.19
  -5  12  -3    4.27    0.39
  -5  12  -3    4.70    0.25
   5  12   3    4.64    0.48
  -5  12  -3    4.36    0.25
  -6 -12  -3    0.59    0.27
   6 -12   3    0.52    0.14
  -6  12  -3    0.44    0.08
  -6  12  -3    0.66    0.24
   6  12   3    0.63    0.09
   6  12   3    0.20    0.23
  -6  12  -3    0.49    0.08
  -7 -12  -3    7.30    0.67
   7 -12   3    6.81    0.39
   7  12   3    6.75    0.73
  -7  12  -3    7.68    0.57
   7  12   3    7.24    0.28
   8 -12   3    0.94    0.19
  -8 -12  -3    0.05    0.34
  -8  12  -3    0.69    0.29
   8  12   3    0.73    0.36
   8  12   3    0.30    0.13
  -9 -13   3    2.37    0.53
  -9  13   3    2.42    0.47
   8 -13  -3    4.34    0.35
  -8 -13   3    3.61    0.62
   8  13  -3    3.90    0.31
  -8  13   3    3.57    0.49
   8  13  -3    3.56    0.54
  -7 -13   3    1.26    0.39
   7 -13  -3    2.08    0.28
   7  13  -3    1.43    0.13
  -7  13   3    2.05    0.36
   7  13  -3    1.29    0.29
   6 -13  -3    3.21    0.28
  -6 -13   3    3.18    0.48
   6  13  -3    3.08    0.17
  -6  13   3    3.10    0.41
   6  13  -3    2.82    0.15
   6  13  -3    3.29    0.45
   5 -13  -3   14.57    0.55
  -5 -13   3   13.78    0.71
   5  13  -3   14.59    0.72
   5  13  -3   14.04    0.34
  -5  13   3   13.78    0.66
   5  13  -3   14.33    0.35
   4 -13  -3    8.80    0.40
  -4 -13   3    8.86    0.51
   4  13  -3    9.25    0.54
  -4  13   3    9.20    0.49
   4  13  -3    8.88    0.22
   4  13  -3    9.16    0.24
  -3 -13   3    5.76    0.37
   3 -13  -3    5.34    0.25
   3 -13  -3    5.21    0.21
   3 -13  -3    5.97    0.30
   3  13  -3    5.42    0.17
   3  13  -3    5.25    0.14
  -3  13   3    5.87    0.36
   3  13  -3    5.25    0.45
   2 -13  -3    2.71    0.19
  -2 -13   3    2.16    0.20
  -2 -13   3    2.47    0.11
   2 -13  -3    2.49    0.18
  -2  13   3    2.62    0.23
   2  13  -3    3.07    0.30
   2  13  -3    2.49    0.10
  -2  13   3    2.68    0.22
  -1 -13   3    0.37    0.10
   1 -13  -3    0.52    0.13
   1 -13  -3    0.57    0.11
  -1 -13   3    0.57    0.06
   1 -13  -3    0.43    0.10
   1  13  -3    0.45    0.17
   1  13  -3    0.45    0.06
  -1  13   3    0.46    0.12
  -1  13   3    0.31    0.13
   0 -13  -3    0.26    0.06
   0 -13  -3    0.48    0.09
   0 -13   3    0.37    0.06
   0 -13  -3    0.39    0.10
   0 -13   3    0.25    0.08
   0  13   3    0.22    0.15
   0  13  -3    0.32    0.16
   1 -13   3   15.76    0.40
  -1 -13  -3   14.69    0.33
  -1 -13  -3   14.99    0.49
   1 -13   3   14.79    0.57
  -1  13  -3   15.16    0.44
   1  13   3   14.32    0.63
   1  13   3   15.71    0.37
  -1  13  -3   15.56    0.48
  -1  13  -3   15.53    0.57
  -2 -13  -3   17.46    0.58
   2 -13   3   17.93    0.64
  -2 -13  -3   17.41    0.35
   2 -13   3   17.91    0.48
  -2  13  -3   18.03    0.57
  -2  13  -3   17.35    0.59
   2  13   3   17.37    0.74
   2  13   3   18.16    0.38
  -3 -13  -3   14.85    0.32
  -3 -13  -3   14.48    0.58
  -3  13  -3   15.15    0.56
   3  13   3   15.52    0.34
   3  13   3   16.08    0.75
  -3  13  -3   15.28    0.53
   4 -13   3    1.87    0.20
  -4 -13  -3    1.76    0.11
   4 -13   3    1.91    0.18
  -4 -13  -3    1.90    0.31
   4  13   3    2.04    0.36
  -4  13  -3    1.96    0.21
  -4  13  -3    1.91    0.27
   4  13   3    1.90    0.11
  -5 -13  -3    1.35    0.29
   5 -13   3    1.59    0.21
  -5 -13  -3    1.75    0.16
  -5  13  -3    1.65    0.19
   5  13   3    1.46    0.35
   5  13   3    1.83    0.12
  -5  13  -3    1.52    0.17
  -5  13  -3    1.56    0.29
  -6 -13  -3   11.26    0.73
   6  13   3   12.66    0.80
  -6  13  -3   11.71    0.65
   6  13   3   13.07    0.35
  -7 -13  -3    0.52    0.29
   7 -13   3    0.47    0.13
  -7  13  -3    0.34    0.22
   7  13   3    0.53    0.10
   7  13   3    1.20    0.32
   8 -13   3    0.68    0.20
  -8 -13  -3    0.22    0.28
  -8  13  -3    0.54    0.26
   8  13   3    0.69    0.33
  -8 -14   3    0.25    0.28
   8 -14  -3    0.17    0.13
   8  14  -3   -0.15    0.26
  -8  14   3    0.06    0.21
   7 -14  -3   -0.07    0.11
  -7 -14   3   -0.05    0.24
  -7  14   3    0.12    0.17
   7  14  -3    0.07    0.06
  -6 -14   3    0.45    0.29
   6 -14  -3    0.26    0.14
   6  14  -3    0.66    0.24
  -6  14   3    0.18    0.18
   6  14  -3    0.56    0.11
   6  14  -3    0.48    0.08
   5 -14  -3    0.15    0.11
  -5 -14   3    0.43    0.21
   5  14  -3    0.23    0.06
   5  14  -3    0.32    0.06
  -5  14   3    0.09    0.13
   5  14  -3    0.34    0.21
  -4 -14   3   36.38    1.10
   4 -14  -3   36.02    0.92
   4  14  -3   36.16    0.62
   4  14  -3   34.81    0.63
  -4  14   3   35.40    1.06
   4  14  -3   35.31    1.13
   3 -14  -3    1.64    0.16
   3 -14  -3    1.62    0.14
   3 -14  -3    1.65    0.23
   3  14  -3    1.67    0.09
   3  14  -3    1.72    0.30
  -3  14   3    1.53    0.23
   3  14  -3    1.68    0.07
  -2 -14   3    0.60    0.15
   2 -14  -3    0.48    0.12
   2 -14  -3    0.50    0.10
  -2 -14   3    0.35    0.05
  -2  14   3    0.46    0.14
  -2  14   3    0.65    0.15
   2  14  -3    0.28    0.17
   2  14  -3    0.41    0.05
   1 -14  -3    4.75    0.23
   1 -14  -3    5.02    0.23
  -1 -14   3    5.26    0.17
   1 -14  -3    5.04    0.30
  -1 -14   3    5.30    0.28
   1  14  -3    4.78    0.35
  -1  14   3    5.22    0.28
  -1  14   3    4.91    0.33
   1  14  -3    5.03    0.17
   0 -14  -3    2.40    0.15
   0 -14   3    2.58    0.20
   0 -14   3    2.40    0.13
   0 -14  -3    2.30    0.16
   0 -14  -3    2.47    0.20
   0  14  -3    2.16    0.13
   0  14  -3    2.26    0.30
   0  14   3    2.44    0.27
  -1 -14  -3    3.85    0.14
  -1 -14  -3    3.65    0.24
  -1 -14  -3    3.97    0.17
   1 -14   3    4.13    0.19
  -1  14  -3    4.45    0.32
  -1  14  -3    4.16    0.24
   1  14   3    4.70    0.37
  -2 -14  -3    0.76    0.06
   2 -14   3    1.00    0.19
   2 -14   3    0.99    0.13
  -2 -14  -3    1.29    0.19
  -2  14  -3    1.17    0.18
  -2  14  -3    0.94    0.18
   2  14   3    0.89    0.08
   2  14   3    0.73    0.21
  -3 -14  -3    0.41    0.05
  -3 -14  -3    0.44    0.15
   3 -14   3    0.67    0.13
   3 -14   3    0.68    0.17
  -3  14  -3    0.40    0.12
  -3  14  -3    0.53    0.17
   3  14   3    0.61    0.07
   3  14   3    0.77    0.24
   4 -14   3    0.62    0.13
  -4 -14  -3    0.63    0.08
  -4 -14  -3    0.48    0.21
   4 -14   3    0.75    0.14
   4  14   3    0.55    0.07
  -4  14  -3    0.52    0.14
   4  14   3    0.23    0.20
  -4  14  -3    0.63    0.17
   5 -14   3   22.93    0.70
  -5 -14  -3   22.20    0.50
  -5 -14  -3   22.50    0.91
  -5  14  -3   22.48    0.58
   5  14   3   23.14    1.04
  -5  14  -3   22.82    0.86
  -5  14  -3   22.54    0.55
   5  14   3   22.57    0.47
   6 -14   3    8.55    0.43
  -6 -14  -3    9.62    0.70
  -6  14  -3    9.72    0.59
   6  14   3    8.62    0.69
   6  14   3    9.32    0.28
   7 -14   3    3.93    0.31
  -7 -14  -3    3.37    0.53
  -7  14  -3    3.33    0.46
   7  14   3    3.17    0.18
   7  14   3    3.01    0.52
  -8 -14  -3    1.20    0.46
  -8  14  -3    2.20    0.42
   8  14   3    2.20    0.48
   8 -15  -3    0.23    0.16
  -8 -15   3    0.12    0.30
   8  15  -3   -0.29    0.24
  -8  15   3    0.20    0.22
   7 -15  -3    2.21    0.29
  -7 -15   3    2.85    0.50
   7  15  -3    2.84    0.15
   7  15  -3    3.24    0.47
  -7  15   3    2.68    0.39
   6 -15  -3    1.10    0.22
   6  15  -3    0.94    0.09
   6  15  -3    0.99    0.30
  -6  15   3    1.01    0.30
  -5 -15   3    1.10    0.29
   5 -15  -3    1.13    0.20
   5  15  -3    0.92    0.07
  -5  15   3    0.98    0.23
   5  15  -3    1.33    0.30
   5  15  -3    1.03    0.07
  -4 -15   3   32.04    1.03
   4 -15  -3   32.76    0.87
  -4  15   3   31.31    1.00
   4  15  -3   33.34    0.55
   4  15  -3   32.27    1.11
   4  15  -3   32.60    0.54
   3 -15  -3    0.11    0.09
   3 -15  -3    0.11    0.10
   3 -15  -3    0.10    0.08
  -3 -15   3    0.06    0.12
   3  15  -3    0.05    0.16
   3  15  -3    0.04    0.03
  -3  15   3    0.00    0.07
   3  15  -3    0.04    0.02
   2 -15  -3    0.13    0.08
  -2 -15   3    0.01    0.08
  -2 -15   3    0.08    0.03
  -2  15   3    0.13    0.11
   2  15  -3   -0.03    0.14
   2  15  -3    0.03    0.03
  -2  15   3    0.14    0.09
  -1 -15   3    6.80    0.34
   1 -15  -3    6.68    0.28
   1 -15  -3    6.56    0.35
   1  15  -3    7.15    0.43
   1  15  -3    6.92    0.21
  -1  15   3    6.97    0.34
  -1  15   3    6.55    0.38
   0 -15   3    8.56    0.26
   0 -15  -3    8.32    0.37
   0 -15  -3    8.60    0.29
   0 -15   3    8.68    0.37
   0 -15  -3    8.38    0.28
   0  15  -3    8.59    0.27
   0  15   3    8.99    0.49
   0  15  -3    9.53    0.47
  -1 -15  -3    2.08    0.11
  -1 -15  -3    2.16    0.12
  -1 -15  -3    2.08    0.19
   1 -15   3    1.90    0.14
   1  15   3    2.04    0.31
  -1  15  -3    2.28    0.29
  -1  15  -3    1.95    0.18
   2 -15   3    1.19    0.21
  -2 -15  -3    1.22    0.19
   2 -15   3    1.03    0.13
  -2 -15  -3    1.01    0.06
  -2  15  -3    0.95    0.16
  -2  15  -3    1.09    0.21
  -3 -15  -3    0.43    0.15
  -3 -15  -3    0.44    0.05
   3 -15   3    0.55    0.11
   3 -15   3    0.61    0.16
   3  15   3    0.61    0.27
  -3  15  -3    0.43    0.15
   3  15   3    0.54    0.06
  -3  15  -3    0.46    0.14
   4 -15   3    4.97    0.29
  -4 -15  -3    5.37    0.41
   4 -15   3    5.13    0.32
  -4 -15  -3    5.21    0.16
   4  15   3    5.28    0.16
   4  15   3    5.23    0.49
  -4  15  -3    5.46    0.30
  -4  15  -3    4.73    0.35
  -5 -15  -3    0.15    0.07
  -5 -15  -3    0.04    0.18
   5 -15   3    0.11    0.08
   5  15   3    0.17    0.05
   5  15   3    0.42    0.23
  -5  15  -3    0.12    0.10
  -5  15  -3    0.09    0.10
  -5  15  -3    0.23    0.15
   6 -15   3    1.95    0.26
  -6 -15  -3    2.37    0.42
  -6  15  -3    1.75    0.36
   6  15   3    2.09    0.12
   6  15   3    2.27    0.64
  -7 -15  -3   12.60    0.87
   7 -15   3   12.53    0.56
   7  15   3   13.36    0.91
   7  15   3   11.76    0.41
  -7  15  -3   12.62    0.72
   8 -15   3    0.72    0.19
  -8  15  -3    0.23    0.24
   8  15   3    0.49    0.34
   8  16  -3    3.34    0.54
   7 -16  -3    0.25    0.15
  -7 -16   3    0.25    0.32
  -7  16   3    0.22    0.19
   7  16  -3    0.68    0.30
   6 -16  -3    0.03    0.11
  -6 -16   3   -0.17    0.23
   6  16  -3    0.10    0.20
   6  16  -3    0.07    0.03
   6  16  -3    0.09    0.05
  -6  16   3    0.13    0.18
   5 -16  -3    1.43    0.22
  -5 -16   3    1.40    0.32
   5  16  -3    1.32    0.32
  -5  16   3    1.58    0.30
  -4 -16   3   23.93    0.89
   4 -16  -3   25.66    0.74
  -4  16   3   22.93    0.83
   4  16  -3   24.69    0.96
   3 -16  -3    0.86    0.22
  -3 -16   3    0.81    0.21
   3 -16  -3    0.62    0.14
   3 -16  -3    0.56    0.13
  -3  16   3    0.80    0.19
   3  16  -3    0.74    0.23
  -2 -16   3    7.97    0.40
   2 -16  -3    7.69    0.33
  -2 -16   3    7.34    0.20
   2 -16  -3    7.42    0.34
  -2  16   3    7.79    0.46
  -2  16   3    7.30    0.39
   2  16  -3    8.05    0.49
   2  16  -3    7.74    0.19
  -1 -16   3    1.78    0.10
   1 -16  -3    1.98    0.16
  -1 -16   3    1.78    0.18
  -1  16   3    1.97    0.23
   1  16  -3    1.83    0.11
  -1  16   3    2.33    0.30
   1  16  -3    2.31    0.33
   0 -16  -3   42.66    0.86
   0 -16  -3   43.49    1.04
   0 -16   3   43.81    0.83
   0 -16  -3   43.80    0.86
   0 -16   3   43.59    1.02
   0  16  -3   42.97    0.85
   0  16   3   43.71    1.21
   0  16  -3   44.50    1.16
  -1 -16  -3    3.12    0.24
  -1 -16  -3    3.32    0.14
   1 -16   3    3.66    0.18
  -1  16  -3    3.48    0.24
   1  16   3    3.53    0.37
  -1  16  -3    4.24    0.31
   2 -16   3    1.37    0.13
  -2 -16  -3    1.34    0.09
  -2 -16  -3    1.25    0.07
  -2 -16  -3    1.00    0.22
   2  16   3    1.45    0.30
  -2  16  -3    1.16    0.18
  -2  16  -3    1.50    0.24
   3 -16   3   24.38    0.65
  -3 -16  -3   24.21    0.43
  -3 -16  -3   24.16    0.81
   3 -16   3   24.03    0.78
  -3  16  -3   25.21    0.73
  -3  16  -3   25.32    0.79
   3  16   3   24.88    1.01
   4 -16   3    3.05    0.24
  -4 -16  -3    3.02    0.33
  -4 -16  -3    2.50    0.09
  -4  16  -3    2.54    0.26
   4  16   3    2.74    0.44
  -4  16  -3    2.19    0.22
   4  16   3    2.61    0.09
   5 -16   3    1.44    0.21
  -5 -16  -3    1.10    0.08
  -5 -16  -3    1.57    0.31
  -5  16  -3    0.97    0.15
  -5  16  -3    1.43    0.26
   5  16   3    0.99    0.30
   5  16   3    1.05    0.08
  -5  16  -3    1.15    0.15
   6 -16   3    3.27    0.28
  -6 -16  -3    3.97    0.51
   6  16   3    3.34    0.55
  -6  16  -3    3.24    0.35
   7 -16   3    1.52    0.24
  -7 -16  -3    1.70    0.42
  -7  16  -3    1.62    0.31
   7  16   3    0.89    0.39
  -8 -16  -3    0.75    0.40
   8 -16   3    0.09    0.15
   8  16   3    0.17    0.33
   8 -17  -3    8.40    0.49
  -8 -17   3    7.51    0.88
   8  17  -3    7.80    0.73
  -8  17   3    7.78    0.64
  -7 -17   3    1.11    0.32
   7 -17  -3    1.51    0.26
   7  17  -3    0.97    0.31
  -7  17   3    0.73    0.27
   6 -17  -3   -0.02    0.11
  -6 -17   3    0.05    0.23
  -6  17   3   -0.01    0.15
   6  17  -3    0.26    0.25
   5 -17  -3    0.29    0.14
  -5 -17   3    0.08    0.21
   5  17  -3    0.29    0.20
  -5  17   3    0.24    0.16
   4 -17  -3    1.74    0.23
  -4 -17   3    1.24    0.26
  -4  17   3    1.42    0.25
   4  17  -3    1.01    0.28
   3 -17  -3   -0.12    0.09
  -3 -17   3    0.10    0.15
   3 -17  -3    0.06    0.10
   3  17  -3    0.03    0.16
  -3  17   3    0.18    0.11
  -2 -17   3    1.94    0.09
  -2 -17   3    2.16    0.27
   2 -17  -3    1.95    0.19
   2 -17  -3    2.07    0.21
  -2  17   3    1.55    0.22
   2  17  -3    1.78    0.09
   2  17  -3    2.08    0.31
  -2  17   3    2.15    0.27
   1 -17  -3   42.31    0.89
  -1 -17   3   41.13    0.76
  -1 -17   3   41.94    1.03
  -1  17   3   39.66    1.12
   1  17  -3   41.44    0.77
   1  17  -3   41.44    1.19
   0 -17  -3   31.51    0.68
   0 -17   3   31.39    0.83
   0 -17  -3   30.92    0.85
   0 -17   3   32.90    0.66
   0 -17  -3   30.98    0.68
   0  17  -3   31.34    0.96
   0  17  -3   31.27    0.67
   0  17   3   32.12    1.02
  -1 -17  -3    2.29    0.12
  -1 -17  -3    2.36    0.15
   1 -17   3    2.07    0.15
  -1  17  -3    2.73    0.32
   1  17   3    1.97    0.32
  -1  17  -3    2.36    0.21
  -2 -17  -3    0.10    0.04
   2 -17   3    0.14    0.08
  -2 -17  -3    0.15    0.03
  -2 -17  -3    0.04    0.09
   2  17   3   -0.19    0.12
  -2  17  -3   -0.15    0.12
  -2  17  -3    0.04    0.08
  -3 -17  -3   10.31    0.52
   3 -17   3    9.68    0.48
   3 -17   3   10.31    0.39
  -3  17  -3   10.69    0.46
  -3  17  -3   10.87    0.49
   3  17   3   11.35    0.68
  -4 -17  -3   27.46    0.95
   4 -17   3   26.54    0.75
   4 -17   3   26.66    0.84
  -4  17  -3   27.65    0.90
  -4  17  -3   26.82    0.71
   4  17   3   27.46    1.14
  -5 -17  -3    0.06    0.17
   5 -17   3    0.10    0.11
  -5  17  -3    0.02    0.10
  -5  17  -3   -0.10    0.08
   5  17   3    0.01    0.19
  -5  17  -3    0.05    0.12
   6 -17   3   12.26    0.53
  -6 -17  -3   12.88    0.78
  -6  17  -3   13.07    0.71
   6  17   3   13.58    0.89
  -7 -17  -3    0.52    0.30
   7 -17   3    0.53    0.16
   7  17   3    0.49    0.29
  -7  17  -3    0.00    0.21
   8 -17   3    0.20    0.14
  -8 -17  -3    0.19    0.37
  -8  17  -3    0.46    0.26
   8  17   3    0.77    0.37
   8 -18  -3    0.24    0.16
  -8 -18   3   -0.40    0.31
  -8  18   3    0.22    0.22
   8  18  -3    0.18    0.30
  -7 -18   3    0.75    0.33
   7 -18  -3    0.62    0.20
  -7  18   3    0.90    0.25
   7  18  -3    1.39    0.35
  -6 -18   3    0.60    0.27
   6 -18  -3    0.27    0.15
  -6  18   3    0.52    0.20
   6  18  -3    0.67    0.27
  -5 -18   3   10.41    0.66
   5 -18  -3   12.33    0.52
   5  18  -3   11.36    0.71
  -5  18   3   11.81    0.63
   4 -18  -3    3.53    0.28
  -4 -18   3    3.95    0.38
   4  18  -3    4.04    0.42
  -4  18   3    3.99    0.34
  -3 -18   3   15.42    0.65
   3 -18  -3   14.71    0.52
   3 -18  -3   15.35    0.48
  -3  18   3   14.59    0.53
  -3  18   3   14.52    0.61
   3  18  -3   15.01    0.74
  -2 -18   3    0.08    0.04
   2 -18  -3    0.19    0.11
  -2 -18   3    0.13    0.12
   2 -18  -3    0.09    0.09
  -2  18   3    0.15    0.15
   2  18  -3    0.01    0.15
   2  18  -3    0.12    0.04
  -2  18   3    0.26    0.12
   1 -18  -3   16.29    0.48
  -1 -18   3   16.71    0.60
  -1 -18   3   16.50    0.38
  -1  18   3   17.92    0.62
   1  18  -3   18.30    0.75
  -1  18   3   17.23    0.69
   1  18  -3   15.99    0.39
   0 -18  -3   17.93    0.47
   0 -18   3   19.71    0.72
   0 -18   3   19.35    0.45
   0 -18  -3   19.18    0.64
   0 -18  -3   18.61    0.48
   0  18  -3   19.58    0.75
   0  18  -3   18.42    0.47
   0  18   3   18.89    0.77
  -1 -18  -3    4.66    0.31
   1 -18   3    4.75    0.22
  -1 -18  -3    4.35    0.16
  -1 -18  -3    4.47    0.18
  -1  18  -3    4.85    0.36
   1  18   3    4.50    0.41
  -2 -18  -3    0.41    0.16
  -2 -18  -3    0.64    0.06
  -2 -18  -3    0.65    0.05
  -2  18  -3    0.56    0.18
  -2  18  -3    0.59    0.15
   2  18   3    0.91    0.27
  -3 -18  -3    6.16    0.41
   3 -18   3    5.40    0.29
  -3  18  -3    6.75    0.40
  -3  18  -3    6.05    0.35
   3  18   3    5.29    0.50
  -4 -18  -3   -0.01    0.13
   4 -18   3    0.14    0.14
   4 -18   3    0.26    0.10
   4  18   3    0.12    0.24
  -4  18  -3    0.08    0.11
  -4  18  -3   -0.02    0.11
  -5 -18  -3    0.58    0.22
   5 -18   3    0.83    0.18
  -5  18  -3    0.73    0.14
  -5  18  -3    0.83    0.12
   5  18   3    0.12    0.24
  -5  18  -3    0.92    0.23
  -6 -18  -3    8.44    0.66
   6 -18   3    7.39    0.42
  -6  18  -3    8.79    0.56
   6  18   3    8.21    0.69
   7 -18   3    1.23    0.23
  -7 -18  -3    1.23    0.41
   7  18   3    1.16    0.37
  -7  18  -3    0.95    0.29
  -8 -18  -3    0.24    0.42
   8 -18   3    0.23    0.15
   8  18   3    0.15    0.32
  -8  18  -3    0.34    0.28
  -8 -19   3    1.62    0.49
   8  19  -3    3.51    0.83
  -8  19   3    3.22    0.51
   7 -19  -3    2.26    0.32
  -7 -19   3    1.55    0.42
  -7  19   3    1.96    0.38
   7  19  -3    1.85    0.41
  -6 -19   3    0.09    0.21
   6 -19  -3    0.03    0.12
   6  19  -3    0.23    0.25
  -6  19   3   -0.07    0.13
  -5 -19   3   -0.07    0.18
   5 -19  -3    0.01    0.10
   5  19  -3    0.09    0.22
   4 -19  -3    3.93    0.29
   4 -19  -3    3.34    0.15
   4 -19  -3    3.34    0.14
  -4 -19   3    3.65    0.38
  -4  19   3    3.87    0.34
   4  19  -3    4.01    0.50
  -3 -19   3    0.80    0.22
   3 -19  -3    0.52    0.15
   3 -19  -3    0.71    0.15
   3  19  -3    0.29    0.20
  -3  19   3    0.28    0.14
  -3  19   3    0.51    0.16
  -2 -19   3    0.11    0.03
   2 -19  -3    0.10    0.09
  -2 -19   3    0.04    0.12
  -2  19   3    0.22    0.14
   2  19  -3    0.13    0.04
  -2  19   3    0.10    0.11
   2  19  -3    0.22    0.22
  -1 -19   3    0.70    0.08
  -1 -19   3    0.87    0.17
   1 -19  -3    0.75    0.13
  -1  19   3    1.15    0.25
  -1  19   3    0.45    0.14
   1  19  -3    0.80    0.10
   1  19  -3    1.22    0.28
   0 -19   3    0.62    0.09
   0 -19  -3    0.32    0.09
   0 -19  -3    0.51    0.14
   0 -19  -3    0.67    0.10
   0 -19   3    0.43    0.14
   0  19  -3    0.44    0.10
   0  19   3    0.60    0.19
  -1 -19  -3    0.37    0.13
  -1 -19  -3    0.53    0.08
   1 -19   3    0.53    0.14
   1 -19   3    0.44    0.09
  -1 -19  -3    0.45    0.07
   1  19   3    0.08    0.18
  -1  19  -3    0.38    0.19
  -2 -19  -3    2.54    0.26
  -2 -19  -3    2.72    0.10
   2 -19   3    2.88    0.19
  -2 -19  -3    2.71    0.09
  -2  19  -3    2.46    0.25
   2  19   3    3.00    0.43
  -2  19  -3    3.12    0.31
   3 -19   3    1.34    0.18
  -3 -19  -3    0.94    0.22
   3  19   3    0.78    0.29
  -3  19  -3    0.95    0.21
  -3  19  -3    1.00    0.21
  -4 -19  -3    2.52    0.35
   4 -19   3    2.75    0.23
   4 -19   3    2.06    0.27
  -4  19  -3    2.08    0.22
   4  19   3    2.58    0.44
  -4  19  -3    2.00    0.29
  -5 -19  -3    4.59    0.78
   5 -19   3    3.52    0.28
   5  19   3    3.12    0.50
  -5  19  -3    3.24    0.19
  -5  19  -3    3.42    0.34
  -5  19  -3    3.16    0.23
  -6 -19  -3   11.77    0.74
   6 -19   3   12.36    0.54
  -6  19  -3   12.84    0.68
   6  19   3   11.38    0.83
  -7 -19  -3    0.16    0.30
   7 -19   3    0.36    0.14
   7  19   3    0.06    0.33
  -7  19  -3    0.57    0.23
  -7 -20   3    1.93    0.49
   7 -20  -3    0.78    0.21
  -7  20   3    1.59    0.34
   7  20  -3    2.01    0.42
   6 -20  -3    3.96    0.34
  -6 -20   3    2.86    0.45
  -6  20   3    3.32    0.43
   6  20  -3    4.05    0.55
  -5 -20   3    1.22    0.28
   5 -20  -3    1.06    0.26
  -5  20   3    0.75    0.22
   5  20  -3    1.64    0.35
  -4 -20   3   38.60    1.22
   4 -20  -3   39.20    1.01
   4 -20  -3   37.38    0.74
   4 -20  -3   37.47    0.77
   4  20  -3   38.04    1.33
  -4  20   3   38.11    1.17
  -3 -20   3   11.39    0.58
   3 -20  -3   12.76    0.48
   3 -20  -3   11.48    0.46
   3  20  -3   14.43    0.74
  -3  20   3   12.19    0.57
  -3  20   3   12.38    0.52
  -2 -20   3    1.52    0.24
   2 -20  -3    1.44    0.19
  -2 -20   3    1.43    0.07
   2  20  -3    1.68    0.33
  -2  20   3    1.28    0.22
   2  20  -3    1.31    0.08
  -2  20   3    1.57    0.26
   1 -20  -3   85.11    1.56
  -1 -20   3   84.18    1.40
  -1 -20   3   81.94    1.76
   1  20  -3   81.54    1.96
  -1  20   3   81.99    1.92
   1  20  -3   82.18    1.42
   0 -20   3   48.07    1.19
   0 -20   3   49.04    0.93
   0 -20  -3   49.37    1.22
   0 -20  -3   45.61    0.95
   0 -20  -3   48.08    0.96
   0  20  -3   48.61    1.33
   0  20   3   49.74    1.58
   1 -20   3    3.67    0.29
  -1 -20  -3    3.36    0.15
  -1 -20  -3    3.27    0.14
   1 -20   3    3.13    0.19
  -1 -20  -3    3.35    0.28
  -1  20  -3    3.13    0.37
   1  20   3    3.10    0.44
  -2 -20  -3    2.42    0.31
  -2 -20  -3    1.85    0.07
  -2 -20  -3    1.86    0.07
   2 -20   3    1.77    0.17
  -2  20  -3    1.94    0.26
   2  20   3    1.35    0.31
  -2  20  -3    1.86    0.28
   3 -20   3    4.41    0.27
  -3 -20  -3    5.72    0.42
   3  20   3    4.57    0.49
  -3  20  -3    5.75    0.37
  -3  20  -3    5.01    0.36
  -4 -20  -3    0.31    0.17
   4 -20   3    0.28    0.11
   4 -20   3    0.34    0.18
  -4  20  -3    0.11    0.12
  -4  20  -3    0.23    0.14
   4  20   3    0.10    0.24
   5 -20   3    6.28    0.36
  -5 -20  -3    5.40    0.48
   5  20   3    5.39    0.58
  -5  20  -3    5.92    0.25
  -5  20  -3    5.67    0.50
  -6 -20  -3    0.30    0.21
   6 -20   3    0.58    0.16
   6  20   3    0.63    0.36
  -6  20  -3    0.55    0.21
  -7 -20  -3    1.49    0.42
   7  20   3    0.75    0.38
  -7  20  -3    0.95    0.26
   7 -21  -3   -0.01    0.13
  -7 -21   3   -0.06    0.25
  -7  21   3    0.18    0.22
   7  21  -3    0.08    0.25
   6 -21  -3    0.43    0.17
  -6 -21   3    0.62    0.28
  -6  21   3    0.93    0.26
   6  21  -3    0.74    0.32
   5 -21  -3    2.12    0.27
  -5 -21   3    2.18    0.37
   5  21  -3    2.37    0.45
  -5  21   3    2.01    0.32
   4 -21  -3   32.28    0.70
   4 -21  -3   33.28    0.74
   4 -21  -3   33.39    0.93
  -4 -21   3   34.96    1.17
  -4  21   3   34.36    1.10
   4  21  -3   33.45    1.26
   3 -21  -3    3.65    0.26
   3 -21  -3    3.06    0.26
  -3 -21   3    2.47    0.33
  -3  21   3    3.39    0.30
  -3  21   3    3.36    0.31
   3  21  -3    2.85    0.43
   2 -21  -3    7.01    0.34
  -2 -21   3    7.49    0.18
  -2 -21   3    7.72    0.46
   2  21  -3    7.41    0.17
  -2  21   3    7.61    0.47
  -2  21   3    7.48    0.43
   2  21  -3    7.72    0.55
   1 -21  -3   22.52    0.77
  -1 -21   3   20.67    0.73
  -1 -21   3   22.71    0.48
   1 -21  -3   22.20    0.59
   1  21  -3   22.95    0.53
  -1  21   3   22.80    0.87
   1  21  -3   22.58    0.89
   0 -21  -3    1.60    0.14
   0 -21   3    1.82    0.13
   0 -21  -3    2.20    0.28
   0 -21   3    1.90    0.25
   0 -21  -3    2.21    0.26
   0  21   3    1.73    0.32
   0  21  -3    1.99    0.32
   1 -21   3    0.70    0.11
  -1 -21  -3    0.90    0.10
  -1 -21  -3    0.84    0.08
   1 -21   3    0.71    0.17
  -1 -21  -3    0.71    0.17
   1  21   3    1.23    0.31
  -1  21  -3    0.84    0.28
  -2 -21  -3   14.71    0.63
   2 -21   3   16.08    0.49
   2  21   3   14.95    0.82
  -2  21  -3   15.61    0.65
  -2  21  -3   15.14    0.61
   3 -21   3    3.80    0.25
  -3 -21  -3    4.30    0.38
  -3  21  -3    4.31    0.34
  -3  21  -3    4.28    0.33
   3  21   3    2.82    0.46
   4 -21   3    1.38    0.20
  -4 -21  -3    1.12    0.28
  -4  21  -3    1.27    0.20
  -4  21  -3    0.82    0.20
  -5 -21  -3    0.14    0.16
   5 -21   3    0.30    0.12
  -5  21  -3    0.17    0.16
   5  21   3    0.64    0.29
  -5  21  -3    0.20    0.11
  -6 -21  -3    0.61    0.30
   6 -21   3    0.73    0.18
  -6  21  -3    0.73    0.21
   6  21   3    0.23    0.29
  -7 -21  -3    0.24    0.50
   7 -21   3    0.00    0.12
  -7  21  -3   -0.07    0.20
  -7 -22   3    0.45    0.34
   7 -22  -3    0.69    0.18
   7  22  -3    0.94    0.35
  -7  22   3    0.86    0.26
  -6 -22   3    6.09    0.57
   6 -22  -3    5.53    0.41
   6  22  -3    5.76    0.61
  -6  22   3    5.20    0.46
  -5 -22   3   -0.02    0.14
   5 -22  -3   -0.13    0.11
  -5  22   3    0.08    0.14
   5  22  -3    0.37    0.25
   4 -22  -3    3.51    0.22
   4 -22  -3    3.79    0.21
   4 -22  -3    3.71    0.29
  -4 -22   3    3.84    0.46
   4  22  -3    3.62    0.61
  -3 -22   3    0.35    0.17
   3 -22  -3    0.67    0.15
  -3  22   3    0.81    0.20
  -3  22   3    0.69    0.20
   3  22  -3    0.81    0.27
   2 -22  -3    0.90    0.16
  -2 -22   3    1.00    0.21
  -2  22   3    0.86    0.24
  -2  22   3    0.71    0.18
   2  22  -3    1.26    0.29
   1 -22  -3   28.55    0.92
  -1 -22   3   29.80    0.59
  -1 -22   3   30.95    0.93
   1 -22  -3   31.17    0.74
   1  22  -3   28.63    1.06
   0 -22  -3   12.14    0.37
   0 -22   3   10.87    0.51
   0 -22  -3   11.39    0.53
   0 -22   3   12.14    0.35
   0  22   3   11.60    0.67
   0  22  -3   12.12    0.65
   1 -22   3    2.85    0.27
   1 -22   3    2.61    0.18
  -1 -22  -3    3.07    0.28
  -1 -22  -3    2.98    0.14
  -1 -22  -3    2.98    0.14
   1  22   3    2.95    0.44
  -1  22  -3    2.56    0.36
  -2 -22  -3   36.49    1.09
   2 -22   3   37.72    0.87
   2  22   3   35.84    1.33
  -2  22  -3   36.01    1.07
  -2  22  -3   37.44    1.06
  -3 -22  -3   12.59    0.63
   3 -22   3   13.27    0.48
  -3  22  -3   13.20    0.60
   3  22   3   11.46    0.78
  -3  22  -3   12.51    0.56
   4 -22   3    0.07    0.08
  -4 -22  -3    0.06    0.19
  -4  22  -3    0.10    0.11
  -4  22  -3   -0.09    0.13
   4  22   3    0.15    0.19
   5 -22   3    0.97    0.17
  -5 -22  -3    0.74    0.22
  -5  22  -3    0.67    0.21
   5  22   3    0.94    0.32
   6 -22   3    2.39    0.29
  -6 -22  -3    2.59    0.43
   6  22   3    2.38    0.50
  -6  22  -3    2.51    0.37
  -7 -22  -3    0.46    0.34
   7 -22   3    0.03    0.14
  -7  22  -3   -0.30    0.20
   7  22   3    0.09    0.32
   7 -23  -3    0.80    0.20
  -7 -23   3    0.29    0.35
   7  23  -3    1.23    0.43
  -7  23   3    0.63    0.26
   6 -23  -3    0.36    0.17
  -6 -23   3    0.48    0.30
  -6  23   3    0.34    0.19
   6  23  -3    0.27    0.24
  -5 -23   3    0.20    0.19
   5 -23  -3   -0.18    0.10
   5  23  -3   -0.01    0.27
  -5  23   3    0.26    0.16
  -4 -23   3    8.09    0.56
   4 -23  -3    6.85    0.39
  -4  23   3    6.37    0.45
   4  23  -3    6.91    0.60
  -3 -23   3    1.64    0.29
   3 -23  -3    1.89    0.23
  -3  23   3    1.68    0.27
   3  23  -3    2.20    0.39
  -3  23   3    1.03    0.22
   2 -23  -3    0.09    0.10
  -2 -23   3    0.02    0.12
   2  23  -3    0.62    0.24
  -2  23   3    0.06    0.17
  -2  23   3    0.05    0.11
   1 -23  -3    2.95    0.21
   1 -23  -3    3.62    0.32
  -1 -23   3    3.43    0.30
  -1 -23   3    3.03    0.14
   1  23  -3    3.26    0.45
  -1  23   3    3.61    0.46
   0 -23  -3    1.17    0.21
   0 -23   3    1.28    0.12
   0 -23  -3    1.46    0.14
   0 -23   3    1.44    0.24
   0  23   3    1.21    0.29
   0  23  -3    1.31    0.29
   1 -23   3   19.11    0.52
  -1 -23  -3   18.36    0.42
   1 -23   3   19.18    0.71
  -1 -23  -3   17.93    0.41
  -1 -23  -3   19.05    0.73
  -1  23  -3   18.88    0.78
   1  23   3   17.65    0.89
  -2 -23  -3   10.05    0.54
   2 -23   3    9.89    0.39
  -2  23  -3    9.74    0.54
  -2  23  -3   10.42    0.52
   2  23   3    9.32    0.70
  -3 -23  -3    0.23    0.16
   3 -23   3    0.21    0.11
  -3  23  -3    0.41    0.18
  -3  23  -3    0.24    0.15
   3  23   3    0.46    0.27
  -4 -23  -3    0.12    0.17
   4 -23   3    0.01    0.16
   4  23   3    0.09    0.23
  -4  23  -3    0.17    0.13
  -4  23  -3    0.24    0.16
  -5 -23  -3    0.05    0.17
   5 -23   3   -0.04    0.11
   5  23   3    0.09    0.25
  -5  23  -3   -0.03    0.12
  -6 -23  -3    2.19    0.45
   6 -23   3    1.65    0.25
   6  23   3    1.90    0.51
  -6  23  -3    1.29    0.27
   7 -23   3    0.16    0.15
  -7 -23  -3   -0.15    0.32
  -7  23  -3   -0.10    0.15
   7  23   3   -0.26    0.35
  -7 -24   3    0.57    0.35
   7 -24  -3    0.86    0.23
  -7  24   3    0.85    0.27
   6 -24  -3    3.18    0.36
  -6 -24   3    3.33    0.51
  -6  24   3    3.94    0.48
   6  24  -3    2.29    0.48
  -5 -24   3    0.53    0.23
   5 -24  -3    0.07    0.10
  -5  24   3    0.08    0.15
   5  24  -3   -0.32    0.19
   4 -24  -3    3.92    0.31
  -4 -24   3    3.21    0.44
   4  24  -3    2.93    0.49
  -4  24   3    3.08    0.32
  -3 -24   3    0.87    0.24
   3 -24  -3    0.69    0.16
  -3  24   3    0.59    0.20
   2 -24  -3    2.21    0.24
  -2 -24   3    3.05    0.31
  -2  24   3    2.39    0.33
   2  24  -3    2.04    0.38
  -2  24   3    2.20    0.32
  -1 -24   3   26.63    0.55
  -1 -24   3   26.42    0.89
   1 -24  -3   27.00    0.68
   1 -24  -3   27.23    0.91
  -1  24   3   26.39    1.02
   1  24  -3   26.10    0.74
   1  24  -3   25.13    1.02
   0 -24  -3    9.57    0.33
   0 -24   3    9.09    0.49
   0 -24  -3    9.40    0.52
   0 -24   3    9.13    0.31
   0  24  -3    9.44    0.60
   0  24   3    9.31    0.62
  -1 -24  -3    6.75    0.44
   1 -24   3    7.71    0.36
   1 -24   3    6.27    0.41
  -1 -24  -3    6.33    0.21
  -1 -24  -3    6.41    0.21
  -1  24  -3    7.35    0.51
   1  24   3    7.03    0.57
  -2 -24  -3    2.53    0.34
   2 -24   3    2.27    0.19
  -2  24  -3    2.15    0.34
   2  24   3    1.67    0.35
  -3 -24  -3   17.51    0.93
   3 -24   3   19.93    0.62
   3  24   3   17.70    1.01
  -3  24  -3   18.72    0.71
  -3  24  -3   20.05    0.77
   4 -24   3    4.71    0.30
  -4 -24  -3    4.98    0.45
  -4  24  -3    4.87    0.35
   4  24   3    4.20    0.61
  -4  24  -3    4.94    0.40
  -5 -24  -3    2.23    0.40
   5 -24   3    1.63    0.24
  -5  24  -3    1.19    0.27
   5  24   3    1.68    0.46
   6 -24   3    2.03    0.28
  -6 -24  -3    2.20    0.41
   6  24   3    1.09    0.47
  -6  24  -3    1.25    0.30
  -6 -25   3   -0.11    0.28
   6 -25  -3    0.04    0.16
   6  25  -3    0.10    0.34
   5 -25  -3    0.07    0.14
  -5 -25   3   -0.02    0.18
   5  25  -3   -0.02    0.22
  -5  25   3    0.11    0.17
   4 -25  -3    7.83    0.42
  -4 -25   3    8.45    0.59
   4 -25  -3    7.32    0.37
  -4  25   3    8.68    0.55
   4  25  -3    7.40    0.64
  -3 -25   3    3.37    0.36
   3 -25  -3    3.16    0.25
  -3  25   3    3.13    0.38
  -3  25   3    2.56    0.34
   3  25  -3    3.77    0.56
  -2 -25   3    2.77    0.36
   2 -25  -3    2.95    0.23
  -2  25   3    2.72    0.35
  -2  25   3    2.53    0.42
   2  25  -3    3.21    0.43
   1 -25  -3    1.88    0.29
  -1 -25   3    2.36    0.12
  -1 -25   3    1.81    0.28
   1  25  -3    2.07    0.23
  -1  25   3    2.56    0.40
   1  25  -3    1.95    0.39
   0 -25   3    6.32    0.25
   0 -25  -3    6.84    0.44
   0 -25  -3    6.22    0.26
   0 -25   3    6.13    0.41
   0  25  -3    6.22    0.50
   0  25   3    7.37    0.58
   1 -25   3    7.07    0.30
   1 -25   3    6.83    0.44
  -1 -25  -3    6.49    0.21
  -1 -25  -3    7.27    0.46
  -1 -25  -3    6.78    0.22
   1  25   3    7.33    0.63
  -1  25  -3    6.70    0.51
  -2 -25  -3    0.21    0.16
   2 -25   3    0.10    0.10
   2 -25   3    0.07    0.09
  -2  25  -3    0.20    0.21
   2  25   3   -0.21    0.19
   3 -25   3    4.53    0.28
  -3 -25  -3    4.94    0.41
   3  25   3    4.60    0.59
  -3  25  -3    5.23    0.39
  -4 -25  -3    2.97    0.43
   4 -25   3    3.11    0.27
  -4  25  -3    2.69    0.32
  -4  25  -3    3.24    0.34
   4  25   3    2.93    0.51
  -5 -25  -3    0.19    0.20
   5 -25   3    0.36    0.16
   5  25   3   -0.09    0.25
  -5  25  -3    0.08    0.17
  -6 -25  -3    0.34    0.29
  -6  25  -3   -0.08    0.19
   6  25   3    0.26    0.32
  -6 -26   3    0.19    0.27
  -6  26   3    0.30    0.19
   6  26  -3   -0.41    0.25
  -5 -26   3    1.16    0.31
   5 -26  -3    1.47    0.25
  -5  26   3    0.89    0.25
   5  26  -3    1.26    0.37
  -4 -26   3    1.67    0.33
   4 -26  -3    1.48    0.21
  -4  26   3    2.01    0.32
   4  26  -3    1.19    0.37
   3 -26  -3    1.99    0.26
  -3 -26   3    1.74    0.29
   3  26  -3    1.48    0.38
  -3  26   3    2.39    0.33
  -3  26   3    1.78    0.29
  -2 -26   3    1.61    0.34
   2 -26  -3    1.33    0.19
  -2  26   3    1.56    0.32
  -1 -26   3    2.26    0.32
   1 -26  -3    2.00    0.19
  -1 -26   3    2.25    0.12
   1  26  -3    2.04    0.37
  -1  26   3    2.09    0.40
   0 -26   3    3.69    0.33
   0 -26  -3    3.08    0.19
   0 -26   3    2.98    0.17
   0 -26  -3    2.66    0.35
   0  26  -3    3.16    0.43
   0  26   3    2.73    0.44
  -1 -26  -3    2.14    0.12
   1 -26   3    2.14    0.29
   1 -26   3    2.35    0.18
  -1  26  -3    1.94    0.35
   1  26   3    1.75    0.37
   2 -26   3    8.95    0.38
  -2 -26  -3    8.99    0.56
  -2  26  -3    9.79    0.57
   2  26   3    9.61    0.84
   3 -26   3    2.62    0.22
  -3 -26  -3    3.23    0.41
   3  26   3    2.66    0.50
  -3  26  -3    3.06    0.36
  -3  26  -3    2.58    0.35
   4 -26   3    0.08    0.12
  -4 -26  -3    0.60    0.22
  -4  26  -3    0.37    0.20
  -4  26  -3    0.24    0.15
   4  26   3    0.48    0.31
   5 -26   3    0.35    0.16
  -5 -26  -3    1.34    0.33
   5  26   3    0.83    0.37
  -5  26  -3    1.02    0.25
   6 -26   3    0.09    0.12
  -6 -26  -3    0.61    0.29
   6  26   3   -0.48    0.28
  -6  26  -3    0.79    0.27
  -6 -27   3    4.38    0.61
   6 -27  -3    3.90    0.35
   6  27  -3    4.32    0.68
  -6  27   3    4.19    0.45
   5 -27  -3   -0.07    0.14
  -5 -27   3    0.55    0.27
  -5  27   3   -0.20    0.13
   5  27  -3    0.20    0.26
  -4 -27   3    4.76    0.48
   4 -27  -3    5.51    0.35
  -4  27   3    4.65    0.42
   4  27  -3    4.69    0.64
  -3 -27   3    0.62    0.21
   3 -27  -3    0.99    0.18
  -3  27   3    0.55    0.19
  -3  27   3    0.78    0.25
   3  27  -3    0.27    0.27
   2 -27  -3    0.54    0.19
  -2 -27   3    0.56    0.21
   2 -27  -3    0.16    0.10
  -2  27   3    0.71    0.28
   2  27  -3    0.09    0.23
  -1 -27   3    0.56    0.18
  -1 -27   3    0.36    0.06
   1 -27  -3    0.60    0.12
   1 -27  -3    0.28    0.16
   1  27  -3    0.30    0.22
  -1  27   3    0.10    0.21
   0 -27  -3    0.22    0.16
   0 -27  -3    0.17    0.08
   0 -27   3    0.34    0.08
   0  27   3    0.33    0.24
   0  27  -3    0.33    0.24
   1 -27   3   -0.03    0.10
   1 -27   3    0.03    0.08
  -1 -27  -3    0.30    0.14
   1  27   3    0.56    0.28
  -1  27  -3    0.21    0.20
  -2 -27  -3    4.31    0.39
   2 -27   3    3.09    0.23
   2 -27   3    3.77    0.35
   2  27   3    3.75    0.55
  -2  27  -3    3.35    0.42
  -3 -27  -3    0.50    0.22
   3 -27   3    0.46    0.13
  -3  27  -3    0.47    0.18
  -3  27  -3    0.19    0.20
   3  27   3    0.31    0.26
   4 -27   3    0.41    0.14
  -4 -27  -3    0.41    0.19
   4  27   3    0.21    0.23
  -4  27  -3    0.56    0.24
  -4  27  -3    0.72    0.23
  -5 -27  -3    4.04    0.52
   5 -27   3    2.70    0.32
  -5  27  -3    2.97    0.42
   5 -28  -3    4.76    0.36
   5  28  -3    3.55    0.73
  -5  28   3    3.62    0.73
   4 -28  -3    2.76    0.30
  -4 -28   3    2.68    0.41
   4  28  -3    3.29    0.55
  -4  28   3    2.69    0.38
  -3 -28   3    0.26    0.20
   3 -28  -3    0.26    0.12
   3  28  -3    0.44    0.27
  -3  28   3    0.13    0.15
  -3  28   3    0.04    0.22
   2 -28  -3    1.93    0.31
  -2 -28   3    2.69    0.35
   2 -28  -3    2.16    0.23
   2  28  -3    2.29    0.45
  -2  28   3    2.31    0.39
  -1 -28   3    2.26    0.12
   1 -28  -3    1.82    0.20
   1 -28  -3    2.07    0.31
  -1 -28   3    2.04    0.30
   1  28  -3    2.11    0.40
  -1  28   3    2.07    0.38
   0 -28  -3    0.47    0.16
   0 -28   3    0.79    0.11
   0 -28  -3    0.95    0.12
   0 -28   3    0.52    0.19
   0  28  -3    0.85    0.28
   0  28   3    0.87    0.32
   1 -28   3    4.99    0.41
   1 -28   3    5.45    0.28
  -1 -28  -3    6.93    0.48
  -1  28  -3    6.30    0.53
   1  28   3    5.15    0.75
   2 -28   3    0.16    0.09
  -2 -28  -3    0.63    0.20
   2 -28   3    0.49    0.16
   2  28   3    0.26    0.22
  -2  28  -3    0.17    0.19
  -3 -28  -3    0.97    0.27
   3 -28   3    1.02    0.22
   3  28   3    0.81    0.35
  -3  28  -3    0.97    0.28
   4 -28   3    0.06    0.12
  -4 -28  -3    0.28    0.19
  -4  28  -3    0.06    0.15
   4  28   3   -0.27    0.25
  -5 -28  -3    0.86    0.29
   5 -28   3    0.42    0.18
   5  28   3    0.66    0.34
  -5 -29   3    1.52    0.40
   5 -29  -3    1.43    0.24
  -5  29   3    1.24    0.28
   5  29  -3    0.59    0.40
   4 -29  -3    1.71    0.23
  -4 -29   3    2.63    0.42
   4  29  -3    2.10    0.45
  -4  29   3    2.79    0.40
  -3 -29   3   -0.04    0.18
  -3  29   3    0.51    0.25
   3  29  -3    0.20    0.26
  -3  29   3    0.09    0.15
  -2 -29   3    0.78    0.21
   2 -29  -3    0.44    0.12
   2 -29  -3    0.42    0.16
   2  29  -3    0.40    0.27
  -2  29   3    0.32    0.23
  -1 -29   3    0.36    0.16
   1 -29  -3    0.26    0.18
   1 -29  -3    0.16    0.09
  -1  29   3    0.31    0.26
   1  29  -3    0.01    0.23
   0 -29  -3    0.16    0.14
   0 -29   3    0.53    0.10
   0 -29   3    0.41    0.18
   0 -29  -3    0.40    0.09
   0  29   3    0.12    0.27
  -1 -29  -3    4.56    0.40
   1 -29   3    4.60    0.25
   1 -29   3    4.30    0.38
  -1  29  -3    4.79    0.49
   1  29   3    4.43    0.60
   2 -29   3    0.72    0.21
   2 -29   3    1.38    0.18
  -2 -29  -3    1.07    0.25
  -2  29  -3    1.29    0.30
   2  29   3    1.36    0.38
   3 -29   3    0.44    0.14
  -3 -29  -3    0.63    0.24
   3  29   3    0.42    0.31
  -3  29  -3    0.29    0.26
   4 -29   3    2.78    0.26
  -4 -29  -3    2.88    0.43
  -4  29  -3    3.06    0.38
   4  29   3    2.45    0.53
  -5 -29  -3    1.95    0.41
  -5  29  -3    2.31    0.39
   5  29   3    1.91    0.53
  -5 -30   3    5.16    0.65
   5  30  -3    3.18    0.61
  -5  30   3    4.04    0.50
  -4 -30   3    0.18    0.23
   4 -30  -3    0.08    0.14
   3 -30  -3    2.68    0.29
  -3 -30   3    2.81    0.41
  -3  30   3    3.04    0.45
   3  30  -3    3.60    0.56
  -2 -30   3    1.22    0.29
   2 -30  -3    0.54    0.20
   2 -30  -3    0.83    0.16
  -2  30   3    1.38    0.34
   2  30  -3    0.31    0.26
  -1 -30   3    0.76    0.21
   1 -30  -3    0.49    0.19
   1 -30  -3    0.53    0.13
  -1  30   3    0.25    0.27
   1  30  -3    0.54    0.30
   0 -30  -3    0.29    0.17
   0 -30  -3    0.29    0.09
   0 -30   3    0.41    0.17
   0 -30   3    0.28    0.08
   0  30  -3    0.64    0.31
   0  30   3    0.23    0.30
  -1 -30  -3    6.93    0.52
   1 -30   3    6.45    0.30
   1 -30   3    7.23    0.50
  -1  30  -3    6.93    0.60
   1  30   3    7.23    0.67
   2 -30   3    0.05    0.09
   2 -30   3    0.16    0.16
  -2 -30  -3    0.41    0.17
   2  30   3    0.41    0.28
  -2  30  -3    0.16    0.25
   3 -30   3    0.45    0.20
   3 -30   3    0.47    0.14
  -3 -30  -3    0.44    0.21
  -3  30  -3    0.31    0.25
   3  30   3    0.13    0.28
  -4 -30  -3    0.68    0.26
   4 -30   3    0.14    0.13
   4  30   3    0.32    0.33
  -4  30  -3    0.42    0.22
   4 -31  -3    0.24    0.16
  -4 -31   3    0.48    0.27
   4  31  -3    0.32    0.30
  -4  31   3    0.07    0.15
   3 -31  -3    0.14    0.13
   3 -31  -3   -0.04    0.14
  -3 -31   3    0.51    0.25
  -3  31   3   -0.29    0.30
   3  31  -3   -0.01    0.29
   2 -31  -3    1.83    0.22
   2 -31  -3    1.90    0.32
  -2 -31   3    2.05    0.37
  -2  31   3    1.97    0.44
   2  31  -3    2.12    0.47
   1 -31  -3    1.46    0.18
  -1 -31   3    2.01    0.35
   1 -31  -3    1.90    0.34
  -1  31   3    1.50    0.37
   1  31  -3    1.40    0.39
   0 -31   3    1.56    0.15
   0 -31   3    1.12    0.24
   0 -31  -3    1.25    0.27
   0  31  -3    1.68    0.42
   0  31   3    1.74    0.44
   1 -31   3    0.78    0.21
  -1 -31  -3    0.94    0.25
   1 -31   3    0.97    0.14
   1  31   3    1.29    0.38
  -1  31  -3    0.62    0.30
   2 -31   3    0.17    0.15
   2 -31   3    0.26    0.13
  -2 -31  -3    0.51    0.19
   2  31   3   -0.04    0.27
  -2  31  -3   -0.17    0.24
   3 -31   3    4.40    0.45
   3 -31   3    5.31    0.33
  -3 -31  -3    5.44    0.89
  -3  31  -3    5.67    0.53
   3  31   3    4.92    0.72
  -4 -31  -3    7.67    0.61
   4 -31   3    7.24    0.42
   4  31   3    7.17    0.91
  -4 -32   3    6.03    0.61
   4 -32  -3    5.25    0.39
   4  32  -3    5.44    0.75
  -4  32   3    5.83    0.51
   3 -32  -3    1.39    0.23
   3 -32  -3    2.45    0.40
  -3 -32   3    1.83    0.35
   3  32  -3    1.95    0.55
   2 -32  -3    0.49    0.20
  -2 -32   3    0.73    0.25
   2 -32  -3    0.38    0.13
   2  32  -3    0.54    0.32
  -2  32   3    0.34    0.33
  -1 -32   3    4.91    0.45
   1 -32  -3    4.86    0.44
   1 -32  -3    4.25    0.25
  -1  32   3    4.33    0.60
   1  32  -3    4.79    0.65
   0 -32   3    0.72    0.23
   0 -32  -3    0.77    0.23
   0  32   3    1.20    0.36
   0  32  -3    0.75    0.30
   1 -32   3    1.05    0.25
   1 -32   3    1.66    0.19
  -1 -32  -3    1.23    0.25
  -1  32  -3    0.95    0.32
   1  32   3    1.49    0.45
   2 -32   3    1.90    0.21
  -2 -32  -3    2.22    0.37
   2 -32   3    1.87    0.34
  -2  32  -3    1.88    0.43
   2  32   3    1.54    0.41
   3 -32   3    1.11    0.34
  -3 -32  -3    1.28    0.30
   3 -32   3    0.92    0.18
   3  32   3    1.37    0.43
  -3  32  -3    0.56    0.36
   3 -33  -3    2.01    0.35
  -3 -33   3    2.14    0.38
   3 -33  -3    1.79    0.25
   3  33  -3    1.70    0.47
   2 -33  -3    0.15    0.11
  -2 -33   3    0.23    0.25
   2 -33  -3    0.26    0.19
  -2  33   3    0.25    0.39
   2  33  -3   -0.29    0.29
  -1 -33   3    0.04    0.15
   1  33  -3   -0.07    0.25
  -1  33   3   -0.34    0.28
   0 -33  -3    2.58    0.57
   0 -33   3    2.06    0.33
   0  33   3    1.58    0.43
   0  33  -3    2.18    0.47
   1 -33   3    0.64    0.20
  -1  33  -3    0.26    0.27
   1  33   3    0.64    0.37
  -2 -33  -3    0.24    0.21
   2 -33   3    0.20    0.11
   2  33   3    0.44    0.33
  -2  33  -3   -0.14    0.32
  -3 -33  -3    8.04    0.63
   3 -33   3    6.04    0.50
   3 -33   3    6.41    0.38
   3  33   3    5.52    0.80
   2 -34  -3    4.27    0.46
   2 -34  -3    3.19    0.36
   2  34  -3    3.71    0.55
  -2  34   3    4.20    0.69
  -1 -34   3    4.84    0.47
   1 -34  -3    3.33    0.46
  -1  34   3    4.11    0.61
   1  34  -3    3.99    0.60
   0 -34   3    6.99    0.53
   0  34  -3    6.77    0.67
   0  34   3    7.69    0.75
  -1 -34  -3    0.23    0.19
   1 -34   3   -0.11    0.20
  -1  34  -3    0.61    0.32
   1  34   3    0.11    0.39
   2 -34   3    1.35    0.28
   2 -34   3    1.25    0.21
  -2 -34  -3    1.02    0.30
  -2  34  -3    1.64    0.42
   2  34   3    0.86    0.46
   1 -35  -3    0.22    0.22
  -1 -35   3    0.19    0.19
  -1  35   3   -0.11    0.33
   1  35  -3    0.22    0.40
   0 -35  -3    1.88    0.35
   0 -35   3    1.77    0.35
   0  35   3    1.05    0.45
   0  35  -3    1.01    0.41
   9   0  -4    0.49    0.13
  -9   0   4    0.28    0.34
   8   0  -4    3.80    0.34
  -8   0   4    3.99    0.55
  -7   0   4    0.65    0.29
   7   0  -4    1.00    0.18
   7   0  -4    0.72    0.19
   6   0  -4    3.98    0.27
   6   0  -4    3.78    0.28
  -6   0   4    3.97    0.48
   5   0  -4    0.14    0.11
  -5   0   4    0.63    0.23
   5   0  -4    0.45    0.12
  -5   0   4    0.69    0.15
   4   0  -4   19.25    0.58
  -4   0   4   18.12    0.61
  -4   0   4   19.06    0.72
   4   0  -4   18.41    0.53
  -3   0   4   93.38    1.80
   3   0  -4   93.47    1.65
   3   0  -4   88.68    1.77
  -3   0   4   92.79    1.84
   3   0  -4   91.01    1.65
   3   0  -4   90.05    1.73
   2   0  -4   78.14    1.38
   2   0  -4   78.86    1.46
   2   0  -4   78.01    1.53
  -2   0   4   76.60    1.40
  -2   0   4   78.89    1.58
   1   0  -4    7.54    0.36
  -1   0   4    8.05    0.24
   1   0  -4    7.75    0.24
  -1   0   4    7.66    0.36
  -1   0   4    8.05    0.25
   1   0  -4    7.92    0.24
   0   0   4   15.17    0.53
   0   0  -4   16.27    0.36
   0   0  -4   15.52    0.54
   0   0   4   16.47    0.38
   1   0   4  397.23    6.47
   2   0   4    0.32    0.10
  -2   0  -4    0.22    0.16
  -2   0  -4    0.21    0.06
  -2   0  -4    0.34    0.12
  -2   0  -4    0.20    0.15
   2   0   4    0.33    0.07
   3   0   4    2.85    0.22
   3   0   4    3.20    0.17
  -3   0  -4    3.66    0.33
  -3   0  -4    3.33    0.26
  -3   0  -4    3.33    0.27
  -4   0  -4    8.15    0.50
   4   0   4    7.71    0.30
  -4   0  -4    7.82    0.45
  -5   0  -4    2.72    0.37
   5   0   4    2.30    0.19
  -5   0  -4    2.75    0.38
  -6   0  -4    2.38    0.37
  -6   0  -4    3.27    0.43
   6   0   4    2.71    0.22
  -7   0  -4    3.02    0.45
  -7   0  -4    3.22    0.45
   7   0   4    2.63    0.23
  -8   0  -4    3.32    0.47
   8   0   4    2.98    0.27
  -8   0  -4    2.61    0.48
   9   0   4    1.58    0.25
  -9  -1   4    0.17    0.29
   9  -1  -4    0.04    0.12
   9   1  -4    0.29    0.15
  -9   1   4    0.03    0.33
   8  -1  -4    0.08    0.13
   8  -1  -4    0.26    0.15
  -8  -1   4   -0.13    0.24
   8   1  -4    0.32    0.14
   8   1  -4    0.33    0.18
  -8   1   4    0.12    0.22
   7  -1  -4    2.08    0.25
  -7  -1   4    1.86    0.39
   7  -1  -4    1.77    0.25
   7   1  -4    1.68    0.23
  -7   1   4    1.81    0.39
   7   1  -4    1.70    0.25
  -7   1   4    2.03    0.32
   6  -1  -4    1.56    0.21
   6  -1  -4    1.83    0.22
  -6  -1   4    1.36    0.32
   6   1  -4    1.42    0.19
  -6   1   4    1.67    0.23
  -6   1   4    1.20    0.30
   6   1  -4    1.72    0.24
  -5  -1   4    2.71    0.36
   5  -1  -4    2.34    0.21
  -5  -1   4    2.47    0.25
  -5   1   4    2.32    0.24
  -5   1   4    2.11    0.35
   5   1  -4    2.43    0.21
   5   1  -4    2.15    0.24
   4  -1  -4    4.46    0.26
   4  -1  -4    5.09    0.28
  -4  -1   4    3.80    0.29
  -4  -1   4    4.36    0.35
  -4   1   4    4.32    0.29
   4   1  -4    4.06    0.27
   4   1  -4    4.85    0.25
  -4   1   4    5.02    0.36
   3  -1  -4    0.48    0.15
   3  -1  -4    0.33    0.15
   3  -1  -4    0.46    0.11
  -3  -1   4    0.38    0.14
  -3  -1   4    0.43    0.17
   3   1  -4    0.47    0.11
   3   1  -4    0.30    0.12
  -3   1   4    0.29    0.14
  -3   1   4    0.30    0.13
   3   1  -4    0.28    0.15
   3   1  -4    0.25    0.08
   2  -1  -4    3.46    0.18
   2  -1  -4    3.49    0.23
  -2  -1   4    4.02    0.20
  -2  -1   4    3.67    0.27
   2   1  -4    3.69    0.20
  -2   1   4    3.78    0.20
   2   1  -4    4.01    0.23
   2   1  -4    3.44    0.27
  -2   1   4    3.58    0.26
  -2   1   4    3.93    0.27
  -1  -1   4    5.48    0.31
  -1  -1   4    5.68    0.20
  -1  -1   4    5.30    0.20
   1  -1  -4    5.69    0.20
   1  -1  -4    5.66    0.20
   1   1  -4    5.22    0.19
  -1   1   4    5.24    0.29
  -1   1   4    5.33    0.21
   1   1  -4    5.63    0.18
  -1   1   4    5.61    0.20
   1   1  -4    5.05    0.29
   0  -1  -4  203.65    3.10
   0  -1   4  201.38    3.50
   0  -1  -4  198.11    3.49
   0   1   4  205.05    3.50
   0   1  -4  203.49    3.50
  -1  -1  -4    0.17    0.10
   1  -1   4    0.07    0.10
  -1  -1  -4    0.24    0.12
   1  -1   4    0.13    0.04
  -1  -1  -4    0.26    0.05
  -1  -1  -4    0.07    0.06
   1  -1   4    0.18    0.05
  -1   1  -4    0.07    0.04
  -1   1  -4    0.17    0.12
  -1   1  -4    0.25    0.05
   1   1   4    0.14    0.04
   1   1   4    0.14    0.04
   2  -1   4   20.92    0.53
  -2  -1  -4   20.27    0.46
  -2  -1  -4   21.04    0.73
   2  -1   4   20.93    0.48
  -2  -1  -4   19.83    0.67
  -2  -1  -4   20.97    0.56
  -2   1  -4   20.85    0.71
  -2   1  -4   21.37    0.56
   2   1   4   19.65    0.49
  -2   1  -4   20.86    0.48
   2   1   4   21.32    0.47
  -2   1  -4   20.76    0.69
  -3  -1  -4    0.73    0.17
   3  -1   4    0.78    0.11
  -3  -1  -4    0.75    0.17
  -3  -1  -4    1.00    0.22
   3  -1   4    0.59    0.13
   3   1   4    0.72    0.13
  -3   1  -4    0.92    0.22
   3   1   4    0.83    0.11
  -3   1  -4    0.77    0.17
  -3   1  -4    1.07    0.20
   4  -1   4    0.02    0.05
  -4  -1  -4    0.31    0.17
  -4  -1  -4    0.07    0.15
  -4   1  -4    0.25    0.14
  -4   1  -4    0.00    0.14
   4   1   4    0.00    0.06
  -5  -1  -4    0.16    0.16
  -5  -1  -4    0.05    0.17
   5  -1   4    0.13    0.08
   5   1   4   -0.04    0.06
  -5   1  -4   -0.19    0.13
  -5   1  -4    0.14    0.18
  -6  -1  -4   -0.13    0.17
   6  -1   4    0.25    0.08
  -6  -1  -4    0.18    0.20
  -6   1  -4    0.18    0.19
   6   1   4    0.05    0.08
  -6   1  -4   -0.06    0.16
   7  -1   4    0.66    0.14
  -7  -1  -4    0.35    0.26
  -7  -1  -4   -0.22    0.21
  -7   1  -4    0.47    0.26
   7   1   4    0.21    0.11
  -7   1  -4    0.62    0.22
  -8  -1  -4    0.60    0.29
  -8  -1  -4    1.06    0.34
   8  -1   4    0.78    0.16
  -8   1  -4    0.61    0.29
   8   1   4    0.78    0.15
  -8   1  -4    0.44    0.29
   9  -1   4    0.06    0.13
   9   1   4   -0.03    0.13
   9  -2  -4    3.11    0.33
  -9  -2   4    1.41    0.56
   9   2  -4    2.37    0.27
   8  -2  -4    5.71    0.36
  -8  -2   4    6.40    0.65
   8   2  -4    5.73    0.35
  -8   2   4    5.20    0.56
   7  -2  -4    0.08    0.11
   7  -2  -4   -0.03    0.11
  -7  -2   4   -0.09    0.20
  -7   2   4    0.01    0.19
   7   2  -4    0.07    0.09
   7   2  -4   -0.08    0.13
  -7   2   4    0.37    0.17
   6  -2  -4    0.41    0.13
   6  -2  -4    0.36    0.12
  -6  -2   4    0.86    0.29
  -6   2   4    0.61    0.24
   6   2  -4    0.32    0.12
   6   2  -4    0.35    0.15
  -6   2   4    0.76    0.17
  -5  -2   4   39.00    1.19
   5  -2  -4   36.85    0.85
   5  -2  -4   36.76    0.90
  -5   2   4   35.48    0.93
   5   2  -4   37.28    0.96
   5   2  -4   36.45    0.86
  -5   2   4   37.27    1.17
   4  -2  -4   12.83    0.44
  -4  -2   4   13.19    0.60
   4  -2  -4   13.24    0.44
  -4  -2   4   13.31    0.53
   4   2  -4   13.30    0.49
  -4   2   4   12.64    0.47
  -4   2   4   13.00    0.58
   4   2  -4   13.34    0.42
  -3  -2   4   11.59    0.50
   3  -2  -4   12.27    0.40
  -3  -2   4   12.08    0.49
   3  -2  -4   11.65    0.48
   3   2  -4   13.51    0.50
  -3   2   4   13.24    0.51
  -3   2   4   12.47    0.46
   3   2  -4   12.16    0.36
   3   2  -4   11.18    0.43
   2  -2  -4    7.19    0.27
  -2  -2   4    7.50    0.38
   2  -2  -4    7.44    0.35
   2  -2  -4    7.97    0.33
  -2  -2   4    8.13    0.39
  -2  -2   4    7.45    0.27
   2   2  -4    7.81    0.29
   2   2  -4    7.22    0.29
   2   2  -4    7.59    0.38
  -2   2   4    7.27    0.32
  -2   2   4    7.21    0.28
  -2   2   4    7.32    0.35
   1  -2  -4  216.56    3.50
  -1  -2   4  222.20    3.76
  -1  -2   4  219.99    3.47
   1   2  -4  218.92    3.44
  -1   2   4  216.20    3.71
   1   2  -4  221.39    3.74
   0  -2  -4    0.65    0.15
   0  -2   4    0.60    0.04
   0  -2  -4    0.65    0.04
   0  -2   4    0.70    0.15
   0  -2   4    0.77    0.08
   0  -2  -4    0.62    0.07
   0  -2   4    0.60    0.03
   0  -2  -4    0.65    0.05
   0   2  -4    0.67    0.06
   0   2  -4    0.72    0.15
   0   2   4    0.62    0.08
   0   2   4    0.56    0.14
   1  -2   4    0.05    0.10
  -1  -2  -4    0.08    0.11
   1  -2   4    0.06    0.05
   1  -2   4    0.05    0.04
  -1  -2  -4    0.06    0.05
  -1  -2  -4    0.11    0.13
  -1  -2  -4    0.08    0.04
  -1   2  -4    0.04    0.03
   1   2   4    0.04    0.03
  -1   2  -4    0.08    0.10
   1   2   4    0.02    0.03
   2  -2   4    5.73    0.27
  -2  -2  -4    5.20    0.20
   2  -2   4    5.71    0.22
  -2  -2  -4    5.08    0.35
  -2  -2  -4    5.07    0.27
  -2  -2  -4    5.53    0.40
  -2   2  -4    5.23    0.37
   2   2   4    4.88    0.22
   2   2   4    5.69    0.20
  -2   2  -4    5.51    0.21
  -2   2  -4    5.84    0.27
  -2   2  -4    5.31    0.34
   3  -2   4    8.39    0.37
  -3  -2  -4    8.98    0.32
  -3  -2  -4    8.79    0.41
   3  -2   4    7.99    0.29
  -3   2  -4    8.61    0.42
  -3   2  -4    8.46    0.39
   3   2   4    8.48    0.28
   3   2   4    8.34    0.34
  -3   2  -4    9.02    0.47
   4  -2   4    2.07    0.16
  -4  -2  -4    2.28    0.31
  -4   2  -4    1.92    0.30
   4   2   4    2.05    0.15
  -4   2  -4    1.92    0.26
  -5  -2  -4    3.69    0.39
   5  -2   4    3.46    0.22
   5   2   4    3.30    0.24
  -5   2  -4    3.46    0.34
  -5   2  -4    3.14    0.39
   6  -2   4    1.92    0.22
  -6  -2  -4    1.85    0.37
  -6  -2  -4    1.94    0.37
   6   2   4    2.06    0.19
  -6   2  -4    1.75    0.33
  -6   2  -4    2.24    0.35
  -7  -2  -4    4.20    0.54
   7  -2   4    3.41    0.26
  -7  -2  -4    3.77    0.52
  -7   2  -4    4.76    0.49
   7   2   4    3.72    0.26
  -7   2  -4    4.20    0.50
   8  -2   4   -0.08    0.10
  -8  -2  -4   -0.18    0.26
  -8  -2  -4   -0.30    0.21
   8   2   4    0.12    0.09
  -8   2  -4   -0.01    0.27
  -8   2  -4   -0.18    0.19
   9  -2   4    0.44    0.17
  -9  -2  -4    0.71    0.56
   9   2   4    0.28    0.15
   9  -3  -4   -0.05    0.13
   9   3  -4    0.02    0.13
  -8  -3   4    0.67    0.29
   8  -3  -4    0.55    0.16
  -8   3   4    0.38    0.25
   8   3  -4    0.29    0.20
   8   3  -4    0.55    0.15
   7  -3  -4    0.92    0.16
   7  -3  -4    0.95    0.20
  -7  -3   4    1.01    0.32
  -7   3   4    0.92    0.28
  -7   3   4    0.86    0.18
   7   3  -4    0.94    0.18
   7   3  -4    1.08    0.24
   6  -3  -4   23.15    0.71
   6  -3  -4   23.01    0.62
  -6  -3   4   23.16    0.99
  -6   3   4   22.70    0.68
  -6   3   4   23.45    0.99
   6   3  -4   23.76    0.67
   6   3  -4   25.60    0.81
   5  -3  -4   13.68    0.43
  -5  -3   4   14.91    0.71
   5  -3  -4   13.55    0.49
   5   3  -4   14.16    0.56
  -5   3   4   14.00    0.68
  -5   3   4   12.97    0.48
   5   3  -4   13.28    0.45
   4  -3  -4   13.40    0.45
  -4  -3   4   13.74    0.55
  -4  -3   4   13.76    0.61
   4   3  -4   14.07    0.53
  -4   3   4   13.82    0.49
   4   3  -4   14.54    0.43
  -4   3   4   14.42    0.60
  -3  -3   4    0.52    0.17
   3  -3  -4    0.32    0.12
   3  -3  -4    0.74    0.13
   3  -3  -4    0.40    0.15
  -3  -3   4    0.41    0.16
  -3   3   4    0.24    0.12
  -3   3   4    0.40    0.14
   3   3  -4    0.46    0.15
   3   3  -4    0.25    0.08
   3   3  -4    0.26    0.10
  -2  -3   4   61.44    1.23
   2  -3  -4   61.47    1.25
  -2  -3   4   62.51    1.14
  -2  -3   4   61.26    1.48
   2  -3  -4   63.95    1.28
   2  -3  -4   60.89    1.16
   2   3  -4   62.13    1.18
  -2   3   4   63.27    1.19
  -2   3   4   62.65    1.25
   2   3  -4   61.33    1.33
   2   3  -4   62.45    1.11
  -2   3   4   61.21    1.28
   1  -3  -4   29.54    0.86
  -1  -3   4   29.76    0.60
   1  -3  -4   29.62    0.61
  -1  -3   4   29.63    0.60
   1  -3  -4   29.85    0.63
  -1  -3   4   28.99    0.80
  -1   3   4   29.38    0.60
  -1   3   4   29.98    0.63
  -1   3   4   28.58    0.76
   1   3  -4   28.79    0.58
   1   3  -4   28.31    0.78
   1   3  -4   28.88    0.56
   0  -3  -4  106.00    1.75
   0  -3   4  106.03    1.67
   0  -3  -4  107.67    2.05
   0  -3   4  105.94    1.76
   0  -3   4  106.71    1.67
   0  -3  -4  105.90    1.70
   0  -3  -4  107.16    2.03
   0  -3   4  106.61    2.04
   0  -3  -4  106.69    1.71
   0   3  -4  107.01    1.75
   0   3   4  105.08    1.77
   0   3  -4  106.63    2.04
  -1  -3  -4   56.58    1.30
  -1  -3  -4   53.10    0.95
  -1  -3  -4   55.33    0.97
   1  -3   4   53.76    0.98
   1  -3   4   53.29    0.98
   1  -3   4   53.75    1.23
  -1  -3  -4   56.25    1.27
  -1   3  -4   53.45    0.99
  -1   3  -4   54.62    0.94
   1   3   4   53.90    0.97
  -1   3  -4   54.10    1.24
   1   3   4   54.92    0.94
   2  -3   4    5.09    0.21
  -2  -3  -4    5.03    0.19
  -2  -3  -4    4.94    0.34
   2  -3   4    5.25    0.27
  -2   3  -4    4.99    0.34
  -2   3  -4    5.18    0.21
   2   3   4    4.88    0.21
   2   3   4    5.21    0.19
   2   3   4    4.67    0.37
  -2   3  -4    5.49    0.26
  -3  -3  -4   59.90    1.11
   3  -3   4   62.02    1.16
  -3  -3  -4   60.02    1.31
   3  -3   4   58.83    1.27
   3   3   4   61.23    1.11
  -3   3  -4   60.19    1.42
  -3   3  -4   60.67    1.31
   3   3   4   58.50    1.21
   3   3   4   61.75    1.51
  -3   3  -4   59.44    1.37
   4  -3   4   25.80    0.64
  -4  -3  -4   26.36    0.85
   4   3   4   27.34    0.95
   4   3   4   25.50    0.60
  -4   3  -4   25.73    0.86
  -4   3  -4   23.97    0.77
  -4   3  -4   26.06    0.82
  -5  -3  -4    1.86    0.32
   5  -3   4    1.94    0.18
   5   3   4    2.08    0.35
   5   3   4    1.82    0.16
  -5   3  -4    2.16    0.34
  -5   3  -4    1.85    0.30
   6  -3   4    1.57    0.20
  -6  -3  -4    1.54    0.34
   6   3   4    1.75    0.17
  -6   3  -4    1.56    0.33
  -6   3  -4    1.67    0.31
   7  -3   4    4.90    0.31
  -7  -3  -4    4.26    0.53
  -7  -3  -4    4.54    0.56
  -7   3  -4    4.24    0.44
  -7   3  -4    5.36    0.51
   7   3   4    4.15    0.27
   8  -3   4    0.74    0.18
  -8  -3  -4    0.72    0.35
  -8  -3  -4    0.22    0.28
   8   3   4    0.55    0.16
  -8   3  -4    0.51    0.30
  -8   3  -4    0.66    0.25
  -9  -3  -4    0.93    0.44
   9  -3   4    0.83    0.18
  -9  -3  -4    1.24    0.48
  -9   3  -4    0.97    0.60
   9   3   4    1.01    0.21
   9  -4  -4    2.00    0.27
   9   4  -4    2.61    0.28
  -8  -4   4    1.91    0.44
   8  -4  -4    2.33    0.29
   8   4  -4    2.37    0.36
  -8   4   4    2.24    0.44
   8   4  -4    2.16    0.25
   7  -4  -4    0.49    0.11
   7  -4  -4    0.35    0.12
  -7  -4   4    0.37    0.27
   7   4  -4    0.51    0.13
   7   4  -4    0.25    0.18
  -7   4   4    0.48    0.23
  -7   4   4    0.16    0.13
  -6  -4   4    0.09    0.22
   6  -4  -4    0.06    0.07
   6  -4  -4    0.15    0.11
  -6   4   4    0.00    0.11
  -6   4   4    0.12    0.17
   6   4  -4   -0.01    0.09
   6   4  -4    0.08    0.13
  -5  -4   4   43.35    1.29
   5  -4  -4   40.28    0.86
   5  -4  -4   41.40    1.00
   5   4  -4   42.67    1.10
  -5   4   4   41.51    0.95
   5   4  -4   43.37    0.94
  -5   4   4   42.05    1.26
   4  -4  -4    0.26    0.11
  -4  -4   4    0.26    0.17
   4  -4  -4    0.24    0.10
   4   4  -4    0.31    0.09
  -4   4   4    0.25    0.11
  -4   4   4    0.10    0.13
   4   4  -4    0.21    0.14
  -3  -4   4    0.64    0.11
   3  -4  -4    0.72    0.18
   3  -4  -4    0.80    0.14
  -3  -4   4    0.69    0.17
  -3  -4   4    0.63    0.18
   3  -4  -4    0.71    0.14
  -3   4   4    0.85    0.15
   3   4  -4    0.78    0.15
   3   4  -4    0.89    0.21
  -3   4   4    0.73    0.18
   3   4  -4    0.54    0.09
   2  -4  -4  231.03    3.83
   2  -4  -4  230.36    3.72
  -2  -4   4  233.78    3.67
   2  -4  -4  229.12    3.83
  -2  -4   4  230.56    3.95
  -2  -4   4  227.06    3.77
   2   4  -4  224.27    3.71
  -2   4   4  220.08    3.81
   2   4  -4  230.90    3.91
   2   4  -4  231.14    3.63
  -2   4   4  229.01    3.79
  -2   4   4  232.38    3.74
  -1  -4   4    1.00    0.20
  -1  -4   4    0.85    0.08
  -1  -4   4    0.84    0.10
   1  -4  -4    1.03    0.11
   1   4  -4    0.86    0.08
   1   4  -4    0.97    0.17
  -1   4   4    0.91    0.11
   1   4  -4    0.81    0.08
  -1   4   4    1.14    0.17
  -1   4   4    1.01    0.10
   0  -4   4   88.20    1.49
   0  -4   4   88.58    1.43
   0  -4   4   89.53    1.43
   0  -4  -4   89.48    1.47
   0  -4  -4   87.60    1.49
   0  -4  -4   88.31    1.75
   0  -4   4   89.56    1.79
   0  -4  -4   88.56    1.46
   0  -4  -4   86.92    1.78
   0   4  -4   89.01    1.48
   0   4  -4   88.81    1.76
   0   4   4   89.10    1.51
  -1  -4  -4  175.29    3.11
   1  -4   4  173.83    2.80
   1  -4   4  173.40    2.80
  -1  -4  -4  173.87    2.79
   1  -4   4  171.49    3.10
  -1  -4  -4  176.54    2.77
   1   4   4  176.37    2.78
  -1   4  -4  172.77    2.76
   1   4   4  172.35    2.76
  -1   4  -4  174.66    3.10
  -1   4  -4  171.26    2.79
  -2  -4  -4    6.24    0.38
   2  -4   4    6.35    0.29
  -2  -4  -4    6.20    0.29
   2  -4   4    6.21    0.24
   2   4   4    7.01    0.43
   2   4   4    6.15    0.25
   2   4   4    6.45    0.21
  -2   4  -4    6.04    0.38
  -2   4  -4    6.35    0.24
   3  -4   4   90.93    1.81
  -3  -4  -4   92.04    1.61
   3  -4   4   95.73    1.67
  -3  -4  -4   94.78    1.84
   3   4   4   94.59    2.07
  -3   4  -4   93.54    1.94
  -3   4  -4   95.68    1.83
   3   4   4   91.57    1.60
  -3   4  -4   93.60    1.90
   3   4   4   91.85    1.73
   4  -4   4    1.24    0.15
  -4  -4  -4    1.29    0.25
  -4   4  -4    0.98    0.19
  -4   4  -4    1.31    0.22
  -4   4  -4    1.06    0.22
   4   4   4    1.21    0.12
   4   4   4    0.79    0.23
   5  -4   4   17.41    0.54
  -5  -4  -4   16.87    0.76
   5   4   4   17.46    0.49
  -5   4  -4   17.88    0.75
   5   4   4   16.68    0.80
  -5   4  -4   17.69    0.72
   6  -4   4    0.26    0.11
  -6  -4  -4    0.11    0.23
  -6   4  -4    0.24    0.18
  -6   4  -4    0.19    0.17
   6   4   4    0.19    0.21
   6   4   4    0.29    0.10
  -7  -4  -4    2.66    0.47
  -7  -4  -4    1.79    0.40
   7  -4   4    2.16    0.28
  -7   4  -4    2.77    0.37
   7   4   4    2.01    0.20
  -7   4  -4    2.45    0.42
  -8  -4  -4    3.24    0.53
   8  -4   4    2.99    0.26
  -8  -4  -4    2.76    0.51
  -8   4  -4    3.54    0.45
  -8   4  -4    2.48    0.45
   8   4   4    2.93    0.28
  -9  -4  -4    0.72    0.37
  -9  -4  -4    1.69    0.55
   9  -4   4    0.95    0.22
  -9   4  -4    1.36    0.49
   9   4   4    0.66    0.18
  -9  -5   4   -0.17    0.26
   9  -5  -4    0.03    0.15
   9   5  -4    0.14    0.35
  -9   5   4    0.25    0.30
   9   5  -4   -0.11    0.13
  -8  -5   4    1.79    0.44
   8  -5  -4    1.45    0.23
   8   5  -4    1.97    0.24
   8   5  -4    1.27    0.30
  -8   5   4    1.68    0.37
  -7  -5   4    7.65    0.73
   7  -5  -4    7.48    0.40
   7   5  -4    6.35    0.34
   7   5  -4    6.91    0.46
   6  -5  -4    6.04    0.35
   6  -5  -4    6.19    0.24
  -6  -5   4    5.38    0.50
  -6   5   4    6.02    0.50
  -6   5   4    5.82    0.27
   6   5  -4    5.75    0.41
  -5  -5   4   27.81    1.03
   5  -5  -4   29.72    0.80
   5  -5  -4   29.21    0.63
  -5   5   4   30.27    1.03
  -5   5   4   28.31    0.70
   5   5  -4   29.31    0.71
   5   5  -4   29.85    0.90
   4  -5  -4    3.56    0.20
   4  -5  -4    3.88    0.24
  -4  -5   4    3.81    0.34
   4   5  -4    3.33    0.20
   4   5  -4    3.74    0.29
  -4   5   4    3.49    0.22
  -4   5   4    4.18    0.34
  -3  -5   4  181.57    3.13
   3  -5  -4  176.24    2.97
  -3  -5   4  166.66    3.16
  -3  -5   4  177.57    2.88
   3  -5  -4  178.93    2.93
  -3   5   4  174.12    3.12
   3   5  -4  175.22    3.14
   3   5  -4  171.32    2.85
  -3   5   4  172.10    2.97
  -2  -5   4   69.35    1.35
   2  -5  -4   68.95    1.30
   2  -5  -4   69.57    1.39
  -2  -5   4   70.83    1.24
  -2  -5   4   68.67    1.51
   2   5  -4   72.60    1.50
   2   5  -4   69.28    1.30
   2   5  -4   70.08    1.21
  -2   5   4   67.67    1.31
  -2   5   4   68.79    1.37
  -2   5   4   68.63    1.38
   1  -5  -4    5.84    0.38
   1  -5  -4    5.45    0.30
  -1  -5   4    5.87    0.20
   1  -5  -4    5.88    0.22
  -1  -5   4    5.69    0.34
   1  -5  -4    5.80    0.24
  -1  -5   4    5.79    0.22
   1   5  -4    5.78    0.20
  -1   5   4    5.38    0.22
  -1   5   4    6.01    0.24
   1   5  -4    5.71    0.18
   1   5  -4    6.05    0.35
   0  -5  -4   18.60    0.61
   0  -5   4   17.66    0.38
   0  -5   4   18.71    0.39
   0  -5  -4   18.74    0.41
   0  -5   4   18.42    0.41
   0  -5  -4   18.75    0.63
   0  -5  -4   18.16    0.41
   0  -5  -4   18.69    0.41
   0  -5   4   19.07    0.70
   0   5  -4   18.07    0.60
   0   5  -4   18.59    0.41
   0   5   4   17.61    0.43
   1  -5   4    6.14    0.36
  -1  -5  -4    6.29    0.23
   1  -5   4    6.04    0.21
  -1  -5  -4    6.17    0.20
   1  -5   4    6.41    0.24
  -1  -5  -4    5.99    0.36
   1   5   4    6.31    0.39
  -1   5  -4    6.01    0.21
  -1   5  -4    6.37    0.21
  -1   5  -4    6.02    0.36
   1   5   4    6.14    0.21
   1   5   4    5.76    0.20
   2  -5   4   34.89    0.73
  -2  -5  -4   36.51    0.81
  -2  -5  -4   36.41    1.09
   2  -5   4   34.31    0.82
  -2  -5  -4   35.45    0.73
   2   5   4   35.15    1.03
  -2   5  -4   36.12    0.80
  -2   5  -4   35.03    0.95
   2   5   4   35.90    0.69
   2   5   4   34.55    0.74
  -3  -5  -4    1.52    0.21
   3  -5   4    1.50    0.13
  -3  -5  -4    1.79    0.12
   3  -5   4    1.60    0.21
   3   5   4    2.03    0.13
  -3   5  -4    2.06    0.23
  -3   5  -4    1.48    0.23
   3   5   4    1.74    0.29
   3   5   4    1.92    0.17
  -3   5  -4    1.36    0.22
  -4  -5  -4   16.80    0.66
   4   5   4   13.98    0.70
  -4   5  -4   15.29    0.62
  -4   5  -4   15.47    0.59
   4   5   4   15.56    0.42
  -4   5  -4   14.55    0.60
  -5  -5  -4    2.06    0.35
   5  -5   4    1.80    0.18
   5   5   4    1.90    0.16
  -5   5  -4    1.93    0.30
   5   5   4    2.52    0.39
  -5   5  -4    2.04    0.32
  -6  -5  -4    3.80    0.48
   6  -5   4    4.47    0.29
  -6   5  -4    4.58    0.44
   6   5   4    4.71    0.25
   6   5   4    4.18    0.44
  -6   5  -4    4.59    0.40
   7  -5   4    1.39    0.19
  -7  -5  -4    0.46    0.35
   7   5   4    1.16    0.16
   7   5   4    1.19    0.34
  -7   5  -4    1.34    0.27
  -7   5  -4    1.09    0.33
  -8  -5  -4   11.34    0.81
  -8  -5  -4    9.58    0.78
   8  -5   4    9.79    0.48
  -8   5  -4    8.87    0.69
   8   5   4    9.67    0.42
  -8   5  -4   10.28    0.87
  -9  -5  -4    0.31    0.40
  -9  -5  -4    0.27    0.35
   9  -5   4    0.80    0.31
   9   5   4    0.52    0.16
  -9   5  -4    0.42    0.29
  -9  -6   4    8.85    0.80
   9  -6  -4    8.33    0.49
   9   6  -4    8.05    0.42
   9   6  -4    7.38    0.59
  -9   6   4    8.52    0.75
  -8  -6   4    0.82    0.37
   8  -6  -4    1.66    0.24
   8   6  -4    2.22    0.34
   8   6  -4    1.39    0.20
  -8   6   4    1.29    0.34
   7  -6  -4    0.71    0.17
   7   6  -4    1.06    0.17
   7   6  -4    0.96    0.25
   6  -6  -4    0.82    0.17
  -6  -6   4    0.96    0.32
   6   6  -4    0.72    0.20
  -6   6   4    0.99    0.26
   6   6  -4    1.04    0.16
   5  -6  -4   13.11    0.34
   5  -6  -4   13.13    0.50
  -5  -6   4   13.98    0.70
  -5   6   4   14.02    0.67
  -5   6   4   12.96    0.38
   5   6  -4   13.72    0.59
   5   6  -4   13.51    0.43
   4  -6  -4    8.47    0.28
   4  -6  -4    8.50    0.36
  -4  -6   4    8.22    0.49
   4   6  -4    8.32    0.30
  -4   6   4    8.24    0.31
  -4   6   4    8.52    0.47
   4   6  -4    8.62    0.31
   4   6  -4    8.92    0.45
   3  -6  -4    2.34    0.19
   3  -6  -4    2.15    0.18
  -3  -6   4    2.27    0.24
  -3  -6   4    2.36    0.16
  -3   6   4    2.09    0.18
  -3   6   4    2.51    0.24
   3   6  -4    1.89    0.26
   3   6  -4    2.27    0.14
   2  -6  -4    2.54    0.18
  -2  -6   4    2.55    0.30
   2  -6  -4    2.53    0.22
   2  -6  -4    2.97    0.23
  -2  -6   4    2.58    0.21
  -2  -6   4    2.63    0.15
   2  -6  -4    2.78    0.22
   2   6  -4    2.46    0.30
   2   6  -4    2.48    0.13
  -2   6   4    2.50    0.19
   1  -6  -4   49.84    0.99
  -1  -6   4   49.43    0.93
  -1  -6   4   49.57    0.89
   1  -6  -4   49.21    1.12
   1  -6  -4   47.49    0.93
  -1  -6   4   48.17    1.17
   1  -6  -4   49.83    1.10
   1   6  -4   48.89    1.15
  -1   6   4   48.93    0.96
   1   6  -4   48.68    0.90
   1   6  -4   47.91    0.87
  -1   6   4   47.10    1.00
   0  -6  -4    0.08    0.05
   0  -6  -4    0.12    0.05
   0  -6   4    0.14    0.13
   0  -6   4    0.17    0.05
   0  -6  -4    0.20    0.06
   0  -6  -4    0.31    0.14
   0  -6   4    0.14    0.05
   0  -6   4    0.17    0.05
   0   6  -4    0.25    0.06
   0   6   4    0.15    0.07
   0   6  -4    0.21    0.15
  -1  -6  -4  143.60    2.65
  -1  -6  -4  140.57    2.35
   1  -6   4  139.00    2.33
  -1  -6  -4  142.79    2.29
   1  -6   4  144.02    2.37
  -1   6  -4  143.36    2.33
  -1   6  -4  142.67    2.62
   1   6   4  139.61    2.33
  -1   6  -4  141.62    2.33
   1   6   4  142.11    2.31
   1   6   4  146.51    2.73
   2  -6   4   21.47    0.51
   2  -6   4   20.09    0.76
  -2  -6  -4   20.46    0.45
   2  -6   4   20.50    0.58
  -2  -6  -4   20.97    0.57
  -2   6  -4   20.18    0.68
   2   6   4   20.55    0.46
  -2   6  -4   20.51    0.54
   2   6   4   20.63    0.77
  -3  -6  -4    1.42    0.11
  -3  -6  -4    1.51    0.21
   3  -6   4    2.08    0.25
   3  -6   4    1.32    0.13
  -3   6  -4    1.79    0.19
  -3   6  -4    1.68    0.25
   3   6   4    1.56    0.29
   3   6   4    1.57    0.11
   4  -6   4    5.34    0.26
  -4  -6  -4    5.11    0.38
   4   6   4    4.76    0.42
  -4   6  -4    4.99    0.35
   4   6   4    5.31    0.22
  -4   6  -4    5.08    0.33
  -4   6  -4    4.78    0.34
  -5  -6  -4    1.90    0.34
   5  -6   4    1.43    0.18
  -5   6  -4    1.37    0.23
  -5   6  -4    1.59    0.27
   5   6   4    1.33    0.15
  -5   6  -4    1.18    0.23
   5   6   4    1.28    0.32
  -6  -6  -4    0.41    0.23
   6  -6   4    0.44    0.12
  -6   6  -4    0.24    0.16
  -6   6  -4    0.38    0.20
   6   6   4    0.61    0.12
   6   6   4    0.51    0.23
   7  -6   4    0.12    0.10
  -7   6  -4    0.10    0.22
   7   6   4    0.10    0.21
  -7   6  -4    0.17    0.19
  -8  -6  -4    1.28    0.36
  -8  -6  -4    1.00    0.38
   8  -6   4    1.35    0.21
  -8   6  -4    1.50    0.36
   8   6   4    1.07    0.17
   9  -6   4    1.33    0.23
  -9  -6  -4    1.68    0.51
  -9  -6  -4    2.03    0.49
   9   6   4    1.64    0.23
  -9   6  -4    1.96    0.45
   9  -7  -4    5.30    0.40
  -9  -7   4    5.21    0.73
   9   7  -4    4.90    0.51
  -9   7   4    3.26    0.52
   9   7  -4    4.53    0.37
   8  -7  -4    0.22    0.13
  -8  -7   4   -0.24    0.22
   8   7  -4    0.10    0.19
   8   7  -4   -0.03    0.09
  -8   7   4    0.02    0.19
   7  -7  -4    7.77    0.49
  -7  -7   4    7.65    0.75
   7   7  -4    8.30    0.54
  -7   7   4    7.71    0.61
   7   7  -4    8.37    0.37
  -6  -7   4   17.18    0.86
   6  -7  -4   16.70    0.61
   6   7  -4   16.79    0.51
  -6   7   4   16.59    0.80
   6   7  -4   18.70    0.75
   5  -7  -4    9.85    0.43
   5  -7  -4    9.08    0.22
  -5  -7   4   10.18    0.62
  -5   7   4    8.63    0.54
   5   7  -4    9.96    0.51
   5   7  -4    9.03    0.34
   4  -7  -4   17.56    0.42
   4  -7  -4   17.37    0.62
   4  -7  -4   17.33    0.45
  -4  -7   4   17.40    0.70
   4   7  -4   18.53    0.68
   4   7  -4   17.71    0.47
  -4   7   4   17.54    0.68
   4   7  -4   16.52    0.45
   3  -7  -4    2.90    0.20
   3  -7  -4    3.27    0.22
  -3  -7   4    3.35    0.18
   3  -7  -4    3.32    0.21
  -3  -7   4    3.60    0.29
   3   7  -4    3.51    0.32
  -3   7   4    3.26    0.27
  -2  -7   4   11.98    0.43
   2  -7  -4   12.60    0.41
  -2  -7   4   10.56    0.56
   2  -7  -4   12.21    0.46
   2  -7  -4   11.89    0.44
   2  -7  -4   11.65    0.42
  -2  -7   4   11.73    0.33
   2   7  -4   11.44    0.30
  -2   7   4   12.45    0.43
   2   7  -4   11.57    0.52
   2   7  -4   12.12    0.38
  -1  -7   4   57.57    1.01
   1  -7  -4   54.68    1.06
  -1  -7   4   55.08    1.12
   1  -7  -4   56.92    1.22
   1  -7  -4   57.96    1.27
   1  -7  -4   55.27    1.12
  -1  -7   4   55.71    1.31
   1   7  -4   56.74    0.99
  -1   7   4   57.32    1.09
   1   7  -4   57.11    1.04
  -1   7   4   56.15    1.08
   1   7  -4   57.22    1.30
   0  -7   4   17.94    0.41
   0  -7   4   18.07    0.63
   0  -7  -4   18.80    0.49
   0  -7   4   18.64    0.43
   0  -7  -4   18.53    0.42
   0  -7  -4   18.44    0.45
   0  -7  -4   18.13    0.61
   0  -7   4   17.72    0.42
   0   7   4   17.43    0.63
   0   7  -4   18.85    0.63
   0   7  -4   18.16    0.41
   0   7   4   17.74    0.44
  -1  -7  -4   68.18    1.19
   1  -7   4   70.55    1.24
  -1  -7  -4   70.71    1.53
   1  -7   4   69.55    1.30
  -1  -7  -4   69.28    1.27
   1  -7   4   69.68    1.52
  -1   7  -4   69.70    1.50
  -1   7  -4   68.64    1.23
  -1   7  -4   70.49    1.25
   1   7   4   69.61    1.22
   1   7   4   72.12    1.61
   1   7   4   69.10    1.26
   2  -7   4   47.97    0.93
  -2  -7  -4   47.09    1.00
  -2  -7  -4   46.59    0.85
   2  -7   4   45.57    1.14
   2   7   4   46.68    0.86
  -2   7  -4   47.06    1.13
  -2   7  -4   48.04    0.99
   2   7   4   45.87    1.25
   2   7   4   45.15    0.94
  -3  -7  -4    1.14    0.09
   3  -7   4    1.22    0.14
  -3  -7  -4    0.99    0.18
   3  -7   4    1.19    0.20
  -3   7  -4    0.97    0.19
   3   7   4    0.98    0.09
  -3   7  -4    1.31    0.20
   3   7   4    1.22    0.26
   4  -7   4   -0.01    0.06
  -4  -7  -4    0.01    0.14
  -4   7  -4    0.14    0.12
  -4   7  -4    0.18    0.11
  -4   7  -4    0.13    0.12
   4   7   4   -0.01    0.17
   4   7   4    0.07    0.06
  -5  -7  -4   38.37    1.21
   5  -7   4   38.89    0.93
   5   7   4   36.96    1.29
  -5   7  -4   39.56    1.07
  -5   7  -4   40.23    1.17
   5   7   4   40.08    0.83
  -5   7  -4   37.23    0.99
  -6  -7  -4    0.41    0.25
   6  -7   4   -0.04    0.08
   6   7   4    0.20    0.08
   6   7   4    0.18    0.25
  -6   7  -4    0.25    0.21
  -6   7  -4    0.30    0.16
  -7  -7  -4    0.47    0.30
   7  -7   4    0.44    0.13
  -7   7  -4    0.63    0.19
   7   7   4    0.27    0.28
   7   7   4    0.32    0.10
   8  -7   4    5.04    0.34
  -8  -7  -4    4.56    0.64
   8   7   4    4.85    0.29
  -8   7  -4    5.35    0.54
  -9  -7  -4    1.22    0.48
   9  -7   4    3.24    0.36
  -9  -7  -4    3.64    0.62
  -9   7  -4    1.87    0.44
   9   7   4    2.92    0.27
  -9  -8   4    1.49    0.45
   9   8  -4    3.09    0.27
  -9   8   4    2.75    0.50
  -8  -8   4   -0.50    0.22
   8  -8  -4    0.19    0.15
   8   8  -4    0.10    0.10
  -8   8   4    0.66    0.26
   8   8  -4    0.11    0.19
   7  -8  -4    1.46    0.24
  -7  -8   4    1.72    0.42
   7   8  -4    1.21    0.17
   7   8  -4    1.45    0.31
  -7   8   4    0.78    0.27
  -6  -8   4    0.79    0.30
   6  -8  -4    1.29    0.21
   6   8  -4    0.81    0.24
   6   8  -4    0.91    0.14
  -6   8   4    0.87    0.24
   5  -8  -4   19.16    0.62
  -5  -8   4   17.59    0.81
   5   8  -4   17.48    0.83
  -5   8   4   17.80    0.76
   5   8  -4   17.81    0.50
   4  -8  -4    4.97    0.29
  -4  -8   4    4.70    0.38
   4  -8  -4    5.06    0.20
   4  -8  -4    4.93    0.19
   4   8  -4    5.15    0.37
   4   8  -4    4.89    0.22
   4   8  -4    5.21    0.22
  -4   8   4    4.78    0.35
   3  -8  -4   16.96    0.48
  -3  -8   4   17.60    0.61
   3  -8  -4   17.01    0.52
  -3  -8   4   17.39    0.44
   3  -8  -4   17.35    0.49
   3   8  -4   16.82    0.41
   3   8  -4   16.97    0.65
  -3   8   4   18.49    0.62
  -2  -8   4    9.84    0.29
  -2  -8   4    9.64    0.38
   2  -8  -4    9.27    0.41
   2  -8  -4   10.00    0.38
   2  -8  -4   10.23    0.36
   2  -8  -4   10.10    0.41
   2   8  -4    9.16    0.33
  -2   8   4    9.98    0.39
   2   8  -4    9.53    0.48
   2   8  -4   10.18    0.26
  -1  -8   4   80.14    1.34
  -1  -8   4   79.06    1.43
   1  -8  -4   82.09    1.65
   1  -8  -4   79.17    1.42
   1  -8  -4   78.75    1.57
   1  -8  -4   78.29    1.58
  -1  -8   4   75.67    1.67
   1   8  -4   78.55    1.67
   1   8  -4   78.49    1.33
  -1   8   4   78.62    1.45
  -1   8   4   79.06    1.44
   1   8  -4   78.43    1.40
   0  -8   4    1.38    0.11
   0  -8  -4    1.66    0.23
   0  -8  -4    1.38    0.13
   0  -8  -4    1.37    0.11
   0  -8   4    1.54    0.11
   0  -8   4    1.41    0.12
   0  -8  -4    1.42    0.12
   0  -8   4    1.64    0.27
   0   8  -4    1.52    0.25
   0   8   4    1.54    0.24
   0   8   4    1.56    0.14
  -1  -8  -4   52.96    1.04
   1  -8   4   54.77    1.07
  -1  -8  -4   54.06    0.95
   1  -8   4   54.68    1.29
   1  -8   4   53.15    1.00
  -1  -8  -4   51.62    1.26
   1   8   4   54.98    0.99
   1   8   4   54.54    1.36
  -1   8  -4   53.43    1.25
  -1   8  -4   52.18    1.00
  -1   8  -4   55.71    1.03
   2  -8   4    3.33    0.29
   2  -8   4    2.95    0.17
  -2  -8  -4    2.83    0.21
  -2  -8  -4    2.99    0.13
   2  -8   4    2.79    0.21
   2   8   4    3.45    0.34
   2   8   4    2.78    0.17
  -2   8  -4    3.10    0.20
   2   8   4    3.04    0.14
  -2   8  -4    3.48    0.29
  -3  -8  -4    5.39    0.20
   3  -8   4    5.19    0.34
  -3  -8  -4    5.27    0.33
   3  -8   4    5.94    0.26
   3   8   4    5.68    0.20
   3   8   4    5.31    0.42
  -3   8  -4    5.42    0.31
  -3   8  -4    5.76    0.35
   4  -8   4    3.78    0.23
  -4  -8  -4    4.25    0.37
  -4   8  -4    4.02    0.32
  -4   8  -4    4.23    0.31
  -4   8  -4    3.50    0.30
   4   8   4    4.62    0.58
   4   8   4    4.15    0.19
  -5  -8  -4   43.81    1.31
   5  -8   4   45.32    1.03
  -5   8  -4   44.15    1.14
  -5   8  -4   41.63    1.06
   5   8   4   46.09    1.46
  -5   8  -4   44.12    1.26
   5   8   4   44.21    0.90
   6  -8   4    3.27    0.26
  -6  -8  -4    3.73    0.51
   6   8   4    3.20    0.49
  -6   8  -4    3.30    0.28
  -6   8  -4    3.71    0.40
  -6   8  -4    3.35    0.31
   7  -8   4    8.42    0.43
  -7  -8  -4    8.61    0.67
  -7   8  -4    8.84    0.62
   7   8   4    9.75    0.73
   7   8   4    8.32    0.35
  -7   8  -4    8.93    0.45
   8  -8   4    9.51    0.48
  -8  -8  -4    6.72    0.71
   8   8   4    9.64    0.73
   8   8   4    9.73    0.40
  -8   8  -4    8.36    0.65
  -9  -9   4    4.37    0.71
   9   9  -4    4.61    0.31
   9   9  -4    4.41    0.53
  -9   9   4    4.52    0.60
   8  -9  -4    1.83    0.28
  -8  -9   4    0.84    0.36
   8   9  -4    1.44    0.32
  -8   9   4    1.17    0.32
   8   9  -4    1.46    0.19
  -7  -9   4   -0.28    0.19
   7  -9  -4    0.28    0.14
   7   9  -4    0.07    0.19
   7   9  -4   -0.01    0.09
  -7   9   4    0.39    0.20
   6  -9  -4    2.51    0.25
  -6  -9   4    2.49    0.43
   6   9  -4    2.41    0.19
   6   9  -4    2.86    0.40
  -6   9   4    2.86    0.40
   5  -9  -4    6.11    0.35
  -5  -9   4    7.25    0.52
   5   9  -4    7.23    0.46
  -5   9   4    6.71    0.47
   5   9  -4    6.91    0.28
  -4  -9   4    4.26    0.36
   4  -9  -4    3.64    0.15
   4  -9  -4    3.85    0.15
   4  -9  -4    4.29    0.28
   4   9  -4    3.73    0.33
   4   9  -4    3.88    0.20
   4   9  -4    3.52    0.17
  -3  -9   4    0.41    0.14
   3  -9  -4    0.46    0.12
   3  -9  -4    0.58    0.10
   3  -9  -4    0.65    0.12
  -3  -9   4    0.41    0.09
  -3   9   4    0.42    0.13
   3   9  -4    0.27    0.16
   3   9  -4    0.61    0.08
   2  -9  -4   16.03    0.51
  -2  -9   4   17.39    0.41
   2  -9  -4   17.44    0.50
   2  -9  -4   17.51    0.65
  -2  -9   4   16.62    0.53
   2   9  -4   15.79    0.48
   2   9  -4   17.31    0.38
   2   9  -4   18.23    0.66
  -2   9   4   17.31    0.54
   1  -9  -4   92.64    1.73
   1  -9  -4   92.15    1.64
  -1  -9   4   93.37    1.56
  -1  -9   4   93.57    1.67
   1  -9  -4   96.04    1.82
  -1   9   4   93.75    1.66
  -1   9   4   93.89    1.69
   1   9  -4   92.93    1.54
   1   9  -4   95.25    1.92
   1   9  -4   88.27    1.70
   0  -9  -4    0.91    0.18
   0  -9   4    1.04    0.11
   0  -9   4    1.07    0.22
   0  -9  -4    1.02    0.12
   0  -9  -4    0.99    0.13
   0  -9   4    1.10    0.11
   0  -9   4    1.04    0.11
   0   9  -4    1.30    0.25
   0   9   4    1.02    0.22
   0   9   4    1.20    0.14
   0   9  -4    0.90    0.09
  -1  -9  -4   69.21    1.30
  -1  -9  -4   69.81    1.31
   1  -9   4   71.63    1.34
   1  -9   4   68.79    1.55
  -1  -9  -4   69.36    1.20
   1  -9   4   70.94    1.26
  -1   9  -4   69.23    1.28
  -1   9  -4   68.07    1.25
  -1   9  -4   68.85    1.50
   1   9   4   69.76    1.62
   1   9   4   71.50    1.23
  -2  -9  -4    0.56    0.07
   2  -9   4    0.32    0.14
  -2  -9  -4    0.46    0.13
   2  -9   4    0.49    0.12
   2  -9   4    0.46    0.09
   2   9   4    0.60    0.10
   2   9   4    0.46    0.07
  -2   9  -4    0.44    0.16
  -2   9  -4    0.47    0.10
   2   9   4    0.45    0.19
   3  -9   4    2.12    0.16
  -3  -9  -4    1.90    0.11
   3  -9   4    2.22    0.27
  -3  -9  -4    1.91    0.24
   3   9   4    2.18    0.12
  -3   9  -4    2.25    0.25
   3   9   4    2.30    0.35
  -3   9  -4    1.99    0.19
   4  -9   4    1.47    0.18
  -4  -9  -4    1.37    0.12
  -4  -9  -4    1.59    0.28
  -4   9  -4    1.33    0.22
   4   9   4    1.93    0.34
  -4   9  -4    1.19    0.22
  -4   9  -4    1.47    0.23
   4   9   4    1.28    0.11
   5  -9   4    4.65    0.28
  -5  -9  -4    4.69    0.46
  -5   9  -4    4.71    0.33
  -5   9  -4    4.77    0.40
   5   9   4    5.12    0.49
   5   9   4    4.41    0.21
  -5   9  -4    4.16    0.31
  -6  -9  -4   12.37    0.74
   6  -9   4   11.11    0.47
  -6   9  -4   11.31    0.46
  -6   9  -4   11.73    0.50
   6   9   4   11.19    0.75
   6   9   4   12.09    0.39
  -6   9  -4   11.46    0.65
  -7  -9  -4    3.06    0.52
   7  -9   4    2.97    0.27
   7   9   4    3.94    0.56
  -7   9  -4    3.30    0.28
   7   9   4    2.68    0.20
  -7   9  -4    2.88    0.43
   8  -9   4   -0.07    0.12
  -8  -9  -4   -0.33    0.27
   8   9   4    0.47    0.32
   8   9   4    0.40    0.12
  -8   9  -4    0.25    0.26
   9 -10  -4    2.09    0.32
  -9 -10   4    1.89    0.49
   9  10  -4    1.20    0.37
  -9  10   4    1.43    0.37
  -8 -10   4   -0.37    0.21
   8 -10  -4    0.20    0.14
   8  10  -4    0.06    0.10
   8  10  -4   -0.02    0.20
  -8  10   4   -0.29    0.17
   7 -10  -4    0.13    0.14
  -7 -10   4   -0.03    0.25
   7  10  -4    0.28    0.11
  -7  10   4    0.38    0.20
   7  10  -4   -0.05    0.12
  -6 -10   4    7.25    0.62
   6 -10  -4    6.83    0.39
   6  10  -4    6.61    0.29
   6  10  -4    7.29    0.50
  -6  10   4    6.71    0.52
   5 -10  -4   16.55    0.59
  -5 -10   4   16.79    0.78
  -5  10   4   16.66    0.76
   5  10  -4   17.39    0.74
   5  10  -4   16.65    0.45
   4 -10  -4    3.85    0.14
   4 -10  -4    3.52    0.25
   4 -10  -4    3.76    0.14
   4  10  -4    3.74    0.17
   4  10  -4    3.77    0.39
  -4  10   4    3.54    0.31
   4  10  -4    3.74    0.19
   3 -10  -4   10.64    0.38
  -3 -10   4   10.57    0.31
   3 -10  -4   10.54    0.40
   3 -10  -4   10.61    0.34
  -3 -10   4   11.30    0.48
   3  10  -4   10.11    0.51
   3  10  -4   10.67    0.28
  -3  10   4   10.83    0.47
   2 -10  -4    5.57    0.32
  -2 -10   4    5.25    0.28
  -2 -10   4    5.58    0.20
   2 -10  -4    5.56    0.28
   2 -10  -4    5.66    0.27
   2  10  -4    5.31    0.17
   2  10  -4    4.75    0.36
   2  10  -4    5.22    0.38
  -2  10   4    5.21    0.28
   1 -10  -4    0.78    0.12
   1 -10  -4    1.12    0.19
  -1 -10   4    0.76    0.12
   1 -10  -4    0.86    0.14
  -1 -10   4    0.65    0.08
  -1  10   4    0.66    0.18
   1  10  -4    0.53    0.20
  -1  10   4    0.87    0.14
   1  10  -4    0.63    0.10
   1  10  -4    0.76    0.08
   0 -10  -4   24.38    0.62
   0 -10   4   26.34    0.81
   0 -10   4   24.52    0.58
   0 -10  -4   25.73    0.76
   0 -10   4   25.04    0.53
   0 -10  -4   25.35    0.62
   0  10   4   24.52    0.81
   0  10  -4   24.92    0.53
   0  10  -4   24.47    0.78
   0  10   4   24.82    0.57
   1 -10   4    0.09    0.05
   1 -10   4    0.04    0.12
   1 -10   4   -0.03    0.06
  -1 -10  -4    0.05    0.04
  -1 -10  -4    0.05    0.06
  -1 -10  -4   -0.06    0.05
  -1  10  -4    0.07    0.15
   1  10   4   -0.03    0.05
  -1  10  -4    0.07    0.06
   1  10   4    0.02    0.15
  -1  10  -4    0.02    0.06
  -2 -10  -4    5.07    0.28
   2 -10   4    5.37    0.35
   2 -10   4    5.31    0.23
  -2 -10  -4    5.35    0.18
   2 -10   4    4.76    0.28
  -2  10  -4    5.33    0.34
   2  10   4    5.19    0.19
   2  10   4    5.31    0.41
  -2  10  -4    5.44    0.27
   3 -10   4    2.46    0.17
   3 -10   4    2.57    0.26
  -3 -10  -4    2.36    0.25
  -3  10  -4    2.63    0.22
   3  10   4    2.42    0.13
   3  10   4    3.16    0.40
  -3  10  -4    2.76    0.26
  -4 -10  -4    1.03    0.11
   4 -10   4    0.64    0.13
  -4 -10  -4    1.01    0.24
   4  10   4    1.12    0.10
   4  10   4    0.86    0.29
  -4  10  -4    0.71    0.19
  -4  10  -4    1.13    0.21
  -4  10  -4    1.05    0.20
  -5 -10  -4    7.56    0.56
   5 -10   4    8.73    0.39
  -5  10  -4    8.25    0.42
  -5  10  -4    7.71    0.40
   5  10   4    8.38    0.29
   5  10   4    7.80    0.61
  -5  10  -4    8.46    0.51
   6 -10   4    0.15    0.11
  -6 -10  -4    0.22    0.24
   6  10   4    0.20    0.21
   6  10   4    0.00    0.07
  -6  10  -4    0.19    0.16
  -6  10  -4   -0.16    0.12
  -6  10  -4    0.36    0.15
  -7 -10  -4    1.14    0.33
   7 -10   4    1.13    0.22
  -7  10  -4    1.04    0.30
   7  10   4    1.23    0.33
  -7  10  -4    1.38    0.21
   7  10   4    1.43    0.17
   8 -10   4   -0.03    0.09
  -8 -10  -4    0.05    0.28
  -8  10  -4    0.16    0.24
   8  10   4    0.23    0.10
   8  10   4    0.17    0.33
  -9 -11   4    2.63    0.55
   9 -11  -4    2.14    0.30
  -9  11   4    2.62    0.49
   9  11  -4    0.95    0.36
   8 -11  -4    0.69    0.21
  -8 -11   4    0.39    0.29
   8  11  -4    0.34    0.12
   8  11  -4    0.24    0.27
  -8  11   4    0.21    0.24
  -7 -11   4    0.14    0.27
   7 -11  -4    0.82    0.20
   7  11  -4    0.85    0.25
  -7  11   4    0.23    0.22
   7  11  -4    0.27    0.10
   6 -11  -4    0.71    0.17
  -6 -11   4    1.14    0.31
   6  11  -4    1.01    0.14
  -6  11   4    0.58    0.20
   6  11  -4    1.08    0.29
   5 -11  -4    0.09    0.11
  -5 -11   4    0.25    0.22
   5  11  -4    0.17    0.08
  -5  11   4    0.24    0.14
   5  11  -4    0.01    0.17
   5  11  -4    0.20    0.07
   4 -11  -4    0.00    0.09
  -4 -11   4    0.25    0.18
  -4  11   4    0.37    0.16
   4  11  -4    0.15    0.19
   4  11  -4    0.22    0.07
   4  11  -4    0.34    0.08
   3 -11  -4    1.92    0.18
  -3 -11   4    1.62    0.23
   3 -11  -4    1.79    0.17
  -3 -11   4    1.91    0.13
   3 -11  -4    1.88    0.15
   3  11  -4    1.82    0.10
  -3  11   4    1.96    0.25
   3  11  -4    1.55    0.26
   2 -11  -4    0.59    0.13
  -2 -11   4    0.60    0.14
  -2 -11   4    0.54    0.08
   2 -11  -4    0.55    0.16
   2 -11  -4    0.41    0.12
   2  11  -4    0.55    0.07
  -2  11   4    0.58    0.13
   2  11  -4    0.78    0.21
  -1 -11   4    1.11    0.09
   1 -11  -4    0.81    0.17
   1 -11  -4    1.09    0.15
  -1 -11   4    1.26    0.15
   1 -11  -4    1.03    0.13
   1 -11  -4    1.22    0.19
  -1  11   4    1.46    0.23
   1  11  -4    1.06    0.08
   1  11  -4    0.99    0.24
  -1  11   4    1.29    0.16
   0 -11   4   40.94    0.77
   0 -11  -4   39.93    1.03
   0 -11  -4   39.50    0.79
   0 -11  -4   39.13    0.88
   0 -11  -4   40.12    0.88
   0 -11   4   39.24    0.84
   0 -11   4   39.57    0.86
   0  11  -4   40.03    0.77
   0  11  -4   39.73    1.05
   0  11   4   40.11    0.82
   0  11   4   40.36    1.10
  -1 -11  -4   30.68    0.75
  -1 -11  -4   31.18    0.62
   1 -11   4   32.07    0.68
  -1 -11  -4   29.79    0.73
   1 -11   4   31.85    0.77
   1 -11   4   31.94    0.94
  -1  11  -4   31.46    0.73
  -1  11  -4   33.02    0.91
   1  11   4   32.72    1.00
   1  11   4   32.57    0.66
  -2 -11  -4    0.16    0.04
  -2 -11  -4    0.12    0.09
   2 -11   4    0.37    0.14
   2 -11   4    0.13    0.08
   2  11   4    0.30    0.07
   2  11   4    0.06    0.13
  -2  11  -4    0.17    0.14
  -2  11  -4    0.34    0.10
  -3 -11  -4    5.77    0.34
   3 -11   4    5.36    0.35
  -3 -11  -4    5.26    0.19
  -3  11  -4    5.38    0.32
  -3  11  -4    5.86    0.35
   3  11   4    5.60    0.20
  -4 -11  -4   15.13    0.65
   4 -11   4   14.25    0.49
  -4 -11  -4   14.38    0.38
  -4  11  -4   14.89    0.55
  -4  11  -4   14.48    0.57
   4  11   4   14.33    0.76
   4  11   4   15.71    0.38
  -5 -11  -4   43.77    1.33
   5 -11   4   44.75    1.06
  -5  11  -4   42.12    1.05
   5  11   4   45.81    0.88
  -5  11  -4   45.53    1.27
   5  11   4   46.82    1.52
  -5  11  -4   43.19    1.06
   6 -11   4    0.19    0.12
  -6 -11  -4    0.32    0.22
  -6  11  -4    0.66    0.17
   6  11   4    0.54    0.09
  -6  11  -4    0.29    0.17
   6  11   4    0.27    0.24
   7 -11   4    1.24    0.22
  -7 -11  -4    0.88    0.36
   7  11   4    1.14    0.32
  -7  11  -4    1.31    0.30
   7  11   4    1.61    0.17
   8 -11   4    2.50    0.31
  -8 -11  -4    1.88    0.43
   8  11   4    1.15    0.38
  -8  11  -4    1.89    0.39
   8  11   4    1.92    0.20
   9 -12  -4    4.08    0.37
  -9 -12   4    4.33    0.72
  -9  12   4    3.57    0.58
   9  12  -4    4.23    0.61
   8 -12  -4    0.11    0.14
  -8 -12   4    0.23    0.34
   8  12  -4   -0.05    0.10
   8  12  -4   -0.18    0.25
  -8  12   4    0.00    0.18
   7 -12  -4    0.15    0.15
  -7 -12   4    0.38    0.31
   7  12  -4   -0.04    0.08
  -7  12   4    0.13    0.18
   7  12  -4    0.00    0.17
  -6 -12   4   -0.08    0.20
   6 -12  -4    0.10    0.12
  -6  12   4    0.25    0.19
   6  12  -4    0.05    0.07
   6  12  -4    0.17    0.20
  -5 -12   4    2.73    0.42
   5 -12  -4    2.95    0.26
   5  12  -4    3.09    0.16
   5  12  -4    3.78    0.39
   5  12  -4    2.86    0.17
  -5  12   4    3.33    0.34
   4 -12  -4    0.01    0.10
  -4 -12   4    0.05    0.14
   4  12  -4    0.06    0.06
   4  12  -4    0.14    0.20
  -4  12   4    0.28    0.14
   4  12  -4    0.10    0.05
  -3 -12   4    0.64    0.10
  -3 -12   4    0.58    0.16
   3 -12  -4    0.41    0.11
   3 -12  -4    0.47    0.12
   3 -12  -4    0.56    0.11
  -3  12   4    0.60    0.15
   3  12  -4    0.44    0.06
   3  12  -4    0.36    0.19
  -2 -12   4    2.41    0.22
  -2 -12   4    2.48    0.15
   2 -12  -4    2.52    0.21
   2 -12  -4    2.57    0.24
   2 -12  -4    2.61    0.20
   2  12  -4    2.58    0.12
  -2  12   4    2.39    0.20
   2  12  -4    2.57    0.32
   1 -12  -4   10.62    0.36
  -1 -12   4   10.69    0.42
  -1 -12   4    9.92    0.37
   1 -12  -4   10.35    0.44
  -1 -12   4   10.53    0.28
   1 -12  -4   10.28    0.38
  -1  12   4   10.06    0.48
  -1  12   4   10.63    0.39
   1  12  -4   10.31    0.51
   1  12  -4   10.20    0.27
   0 -12   4   34.47    0.78
   0 -12   4   34.33    0.79
   0 -12  -4   34.52    0.81
   0 -12   4   34.85    0.69
   0 -12  -4   34.78    0.71
   0  12  -4   32.75    0.68
   0  12   4   35.10    1.01
   0  12   4   35.34    0.74
   0  12  -4   34.82    0.98
  -1 -12  -4    3.38    0.22
  -1 -12  -4    3.63    0.15
   1 -12   4    3.65    0.22
   1 -12   4    3.91    0.19
   1  12   4    3.70    0.18
   1  12   4    3.70    0.34
  -1  12  -4    4.14    0.31
  -1  12  -4    3.87    0.22
  -2 -12  -4    2.22    0.11
   2 -12   4    1.99    0.15
  -2 -12  -4    1.89    0.20
   2 -12   4    2.62    0.27
[truncated: 645,543 more chars]
